# Supplementary material for: Primary and secondary anti-viral response captured by the dynamics and phenotype of individual T cell clones
Source: eLife journal article supplement (doi:10.7554/elife.53704), 2020-02-21
Supplement: supp [file elife-53704-supp-v1.zip]

Archive with 28 entries (28 files):
- elife_poa_e53704_Figure_3_source_data_3.csv
- elife_poa_e53704_Figure_2_source_data_2.csv
- elife_poa_e53704_Figure_1_figure_supplement_1.pdf
- elife_poa_e53704_Figure_2_figure_supplement_2.pdf
- elife_poa_e53704_Figure_5_figure_supplement_1.pdf
- elife_poa_e53704_Figure_5_source_data_2.csv
- elife_poa_e53704_Figure_3_figure_supplement_1.pdf
- elife_poa_e53704_Figure_1_source_data_3.xlsx
- elife_poa_e53704_Figure_5_figure_supplement_2.pdf
- elife_poa_e53704_Figure_1_source_data_1.xlsx
- elife_poa_e53704_Figure_3_source_data_1.xlsx
- elife_poa_e53704_Figure_2_figure_supplement_4.pdf
- elife_poa_e53704_Figure_4_source_data_1.xlsx
- elife_poa_e53704_Figure_4_source_data_2.csv
- elife_poa_e53704_Transparent_Reporting_File.docx
- elife_poa_e53704_Figure_4_figure_supplement_4.pdf
- elife_poa_e53704_Figure_4_figure_supplement_1.pdf
- elife_poa_e53704_Figure_4_figure_supplement_2.pdf
- elife_poa_e53704_Figure_3_source_data_2.csv
- elife_poa_e53704_Figure_5_figure_supplement_3.pdf
- elife_poa_e53704_Figure_3_figure_supplement_2.pdf
- elife_poa_e53704_Figure_2_source_data_1.xlsx
- elife_poa_e53704_Figure_1_figure_supplement_2.pdf
- elife_poa_e53704_Figure_2_figure_supplement_3.pdf
- elife_poa_e53704_Figure_4_figure_supplement_3.pdf
- elife_poa_e53704_Figure_1_source_data_2.csv
- elife_poa_e53704_Figure_2_figure_supplement_1.pdf
- elife_poa_e53704_Figure_5_source_data_1.csv
