# Supplementary material for: Primary and secondary anti-viral response captured by the dynamics and phenotype of individual T cell clones
Source: eLife journal article supplement (doi:10.7554/elife.53704), 2020-02-21
Supplement: supp [file elife-53704-supp-v1.zip › elife_poa_e53704_Figure_1_source_data_1.xlsx]

## Sheet: Sheet1
Donor	Vaccination	Day_after_vaccination	Sample_id	Number_of_cells	Cell_fraction	Read_number	UMI_number	Unique_clonotypes_number	Method
M1	1	0	M1_0_F1	~4 mln	PBMC	2992472	738123	299183	TCR alpha seq
M1	1	0	M1_0_F1	~4 mln	PBMC	3548289	974827	398473	TCR beta seq
M1	1	0	M1_0_F2	~4 mln	PBMC	2657325	659518	275583	TCR alpha seq
M1	1	0	M1_0_F2	~4 mln	PBMC	3846212	801737	341717	TCR beta seq
M1	1	0	M1_0_CD4	~1 mln	CD4+	2878566	206093	127678	TCR alpha seq
M1	1	0	M1_0_CD4	~1 mln	CD4+	2554826	279602	170231	TCR beta seq
M1	1	0	M1_0_CD8	~1 mln	CD8+	2993176	187645	48697	TCR alpha seq
M1	1	0	M1_0_CD8	~1 mln	CD8+	1913256	215601	55584	TCR beta seq
M1	1	0	M1_0_P4	~20 500	CD3+CD45RA-CCR7+	1592730	11410	1769	TCR alpha seq
M1	1	0	M1_0_P4	~20 500	CD3+CD45RA-CCR7+	1163888	8116	1705	TCR beta seq
M1	1	0	M1_0_P5	~400 000	CD3+CD45RA-CCR7-	768866	85394	28318	TCR alpha seq
M1	1	0	M1_0_P5	~400 000	CD3+CD45RA-CCR7-	1016413	94020	30722	TCR beta seq
M1	1	0	M1_0_P6	~380 000	CD3+CD45RA+CCR7-	1245433	51863	3725	TCR alpha seq
M1	1	0	M1_0_P6	~380 000	CD3+CD45RA+CCR7-	1088093	63623	4048	TCR beta seq
M1	1	0	M1_0_P7	~2100	CD3+CD45RA+CCR7+CD95+	1062	NA	176	RNAseq
M1	1	0	M1_0_P7	~2100	CD3+CD45RA+CCR7+CD95+	1787	NA	201	RNAseq
M1	1	5	M1_5_F1	~4 mln	PBMC	3113602	1383433	515432	TCR alpha seq
M1	1	5	M1_5_F1	~4 mln	PBMC	4892587	1839579	693777	TCR beta seq
M1	1	5	M1_5_F2	~4 mln	PBMC	3034747	1402560	523967	TCR alpha seq
M1	1	5	M1_5_F2	~4 mln	PBMC	5550967	1971752	727225	TCR beta seq
M1	1	5	M1_5_CD4	~1 mln	CD4+	2979171	248235	144669	TCR alpha seq
M1	1	5	M1_5_CD4	~1 mln	CD4+	2536633	274881	160973	TCR beta seq
M1	1	5	M1_5_CD8	~1 mln	CD8+	3692483	224602	62351	TCR alpha seq
M1	1	5	M1_5_CD8	~1 mln	CD8+	1949798	267131	73583	TCR beta seq
M1	1	10	M1_10_F1	~4 mln	PBMC	3345705	1177390	463346	TCR alpha seq
M1	1	10	M1_10_F1	~4 mln	PBMC	4208163	1413473	592995	TCR beta seq
M1	1	10	M1_10_F2	~4 mln	PBMC	3227599	1151288	457836	TCR alpha seq
M1	1	10	M1_10_F2	~4 mln	PBMC	3813734	1266471	547018	TCR beta seq
M1	1	10	M1_10_CD4	~1 mln	CD4+	3575011	144548	97400	TCR alpha seq
M1	1	10	M1_10_CD4	~1 mln	CD4+	2381451	174300	117311	TCR beta seq
M1	1	10	M1_10_CD8	~1 mln	CD8+	2472223	189053	59308	TCR alpha seq
M1	1	10	M1_10_CD8	~1 mln	CD8+	2318788	65413	26948	TCR beta seq
M1	1	15	M1_15_F1	~4 mln	PBMC	2904545	602627	280118	TCR alpha seq
M1	1	15	M1_15_F1	~4 mln	PBMC	3367253	728646	356520	TCR beta seq
M1	1	15	M1_15_F2	~4 mln	PBMC	3169461	508715	233352	TCR alpha seq
M1	1	15	M1_15_F2	~4 mln	PBMC	3523427	641077	304230	TCR beta seq
M1	1	15	M1_15_CD4	~1 mln	CD4+	3827195	64920	50622	TCR alpha seq
M1	1	15	M1_15_CD4	~1 mln	CD4+	1900690	77222	60692	TCR beta seq
M1	1	15	M1_15_CD8	~1 mln	CD8+	2782838	94989	36843	TCR alpha seq
M1	1	15	M1_15_CD8	~1 mln	CD8+	1848246	113204	43294	TCR beta seq
M1	1	15	M1_15_P3	~300 000	CD3+CD45RA+CCR7+	1249283	27094	24787	TCR alpha seq
M1	1	15	M1_15_P3	~300 000	CD3+CD45RA+CCR7+	873036	32768	29786	TCR beta seq
M1	1	15	M1_15_P4	~70 000	CD3+CD45RA-CCR7+	1093009	9583	7579	TCR alpha seq
M1	1	15	M1_15_P4	~70 000	CD3+CD45RA-CCR7+	785905	11695	8757	TCR beta seq
M1	1	15	M1_15_P5	~500 000	CD3+CD45RA-CCR7-	1167712	51244	25343	TCR alpha seq
M1	1	15	M1_15_P5	~500 000	CD3+CD45RA-CCR7-	1036067	53677	26598	TCR beta seq
M1	1	15	M1_15_P6	~340 000	CD3+CD45RA+CCR7-	723995	22341	4101	TCR alpha seq
M1	1	15	M1_15_P6	~340 000	CD3+CD45RA+CCR7-	975528	30025	4767	TCR beta seq
M1	1	15	M1_15_Tet+	~1100	CD3+CD8+A02-NS4B214-222+	2661	NA	545	RNAseq
M1	1	15	M1_15_Tet+	~1100	CD3+CD8+A02-NS4B214-222+	2501	NA	512	RNAseq
M1	1	15	M1_15_Tet-	~500 000	CD3+CD8+A02-NS4B214-222-	936913	170963	85508	TCR alpha seq
M1	1	15	M1_15_Tet-	~500 000	CD3+CD8+A02-NS4B214-222-	967150	196334	96071	TCR beta seq
M1	1	21	M1_21_F1	~4 mln	PBMC	3104512	1377607	485814	TCR alpha seq
M1	1	21	M1_21_F1	~4 mln	PBMC	3944530	1721207	620159	TCR beta seq
M1	1	21	M1_21_F2	~4 mln	PBMC	2874530	1559345	552462	TCR alpha seq
M1	1	21	M1_21_F2	~4 mln	PBMC	3831990	1846524	684885	TCR beta seq
M1	1	21	M1_21_Tet+	~12 300	CD3+CD8+A02-NS4B214-222+	1094764	43185	2113	TCR alpha seq
M1	1	21	M1_21_Tet+	~12 300	CD3+CD8+A02-NS4B214-222+	921429	25621	1497	TCR beta seq
M1	1	21	M1_21_Tet-	~500 000	CD3+CD8+A02-NS4B214-222-	647805	201721	80977	TCR alpha seq
M1	1	21	M1_21_Tet-	~500 000	CD3+CD8+A02-NS4B214-222-	898537	242137	95021	TCR beta seq
M1	1	45	M1_45_F1	~4 mln	PBMC	3378573	681913	305319	TCR alpha seq
M1	1	45	M1_45_F1	~4 mln	PBMC	3786724	754739	359654	TCR beta seq
M1	1	45	M1_45_F2	~4 mln	PBMC	3506852	562084	262692	TCR alpha seq
M1	1	45	M1_45_F2	~4 mln	PBMC	3931720	644763	309569	TCR beta seq
M1	1	45	M1_45_CD4	~1 mln	CD4+	3655784	119431	84166	TCR alpha seq
M1	1	45	M1_45_CD4	~1 mln	CD4+	2335925	159835	111173	TCR beta seq
M1	1	45	M1_45_CD8	~1 mln	CD8+	2501487	164498	55414	TCR alpha seq
M1	1	45	M1_45_CD8	~1 mln	CD8+	2583237	214256	67827	TCR beta seq
M1	1	45	M1_45_P4	~160 000	CD3+CD45RA-CCR7+	1099973	27929	20583	TCR alpha seq
M1	1	45	M1_45_P4	~160 000	CD3+CD45RA-CCR7+	1226245	35679	23861	TCR beta seq
M1	1	45	M1_45_P5	~200 000	CD3+CD45RA-CCR7-	995378	43870	19026	TCR alpha seq
M1	1	45	M1_45_P5	~200 000	CD3+CD45RA-CCR7-	1213869	51884	20792	TCR beta seq
M1	1	45	M1_45_P6	~250 000	CD3+CD45RA+CCR7-	1887133	37760	3944	TCR alpha seq
M1	1	45	M1_45_P6	~250 000	CD3+CD45RA+CCR7-	1161905	47397	4162	TCR beta seq
M1	1	45	M1_45_P7	~1300	CD3+CD45RA+CCR7+CD95+	1529	NA	564	RNAseq
M1	1	45	M1_45_P7	~1300	CD3+CD45RA+CCR7+CD95+	2422	NA	698	RNAseq
M1	1	45	M1_45_Tet+	~16 500	CD3+CD8+A02-NS4B214-222+	1036620	8950	1099	TCR alpha seq
M1	1	45	M1_45_Tet+	~16 500	CD3+CD8+A02-NS4B214-222+	1047645	8757	870	TCR beta seq
M1	1	45	M1_45_Tet-	~400 000	CD3+CD8+A02-NS4B214-222-	1313693	101908	44289	TCR alpha seq
M1	1	45	M1_45_Tet-	~400 000	CD3+CD8+A02-NS4B214-222-	1021553	121666	49397	TCR beta seq
M1	2	0	M1_v2_pre0_F1	~4 mln	PBMC	6506421	1232441	453820	TCR alpha seq
M1	2	0	M1_v2_pre0_F1	~4 mln	PBMC	4417808	1347268	553491	TCR beta seq
M1	2	0	M1_v2_pre0_F2	~4 mln	PBMC	6436252	1271578	461329	TCR alpha seq
M1	2	0	M1_v2_pre0_F2	~4 mln	PBMC	7131242	1688366	638223	TCR beta seq
M1	2	0	M1_v2_0_F1	~4 mln	PBMC	7528577	757262	289693	TCR alpha seq
M1	2	0	M1_v2_0_F1	~4 mln	PBMC	7267785	785482	315831	TCR beta seq
M1	2	0	M1_v2_0_CD4	~1 mln	CD4+	2719745	448005	234359	TCR alpha seq
M1	2	0	M1_v2_0_CD4	~1 mln	CD4+	2868690	586014	293003	TCR beta seq
M1	2	0	M1_v2_0_CD8	~1 mln	CD8+	3074981	557646	122548	TCR alpha seq
M1	2	0	M1_v2_0_CD8	~1 mln	CD8+	2656527	668646	144021	TCR beta seq
M1	2	0	M1_v2_0_P4	~80 000	CD3+CD45RA+CCR7+	1903046	19165	11427	TCR alpha seq
M1	2	0	M1_v2_0_P4	~80 000	CD3+CD45RA+CCR7+	2897592	25833	13201	TCR beta seq
M1	2	0	M1_v2_0_P5	~800 000	CD3+CD45RA-CCR7+	1309379	64375	24264	TCR alpha seq
M1	2	0	M1_v2_0_P5	~800 000	CD3+CD45RA-CCR7+	1558672	69034	24648	TCR beta seq
M1	2	0	M1_v2_0_P6	~620 000	CD3+CD45RA-CCR7-	1030440	75035	36291	TCR alpha seq
M1	2	0	M1_v2_0_P6	~620 000	CD3+CD45RA-CCR7-	1991404	103245	49854	TCR beta seq
M1	2	0	M1_v2_0_P7	~14 000	CD3+CD45RA+CCR7-	1586638	2703	580	TCR alpha seq
M1	2	0	M1_v2_0_P7	~14 000	CD3+CD45RA+CCR7-	1797272	3253	658	TCR beta seq
M1	2	0	M1_v2_0_Tet+	~9 000	CD3+CD8+A02-NS4B214-222+	86909228	24193	164 paired	10x genomics TRA
M1	2	0	M1_v2_0_Tet+	~9 000	CD3+CD8+A02-NS4B214-222+	145621254	40816	164 paired	10x genomics TRB
M1	2	5	M1_v2_5_F1	~4 mln	PBMC	6744286	929158	324544	TCR alpha seq
M1	2	5	M1_v2_5_F1	~4 mln	PBMC	6537014	984742	370791	TCR beta seq
M1	2	5	M1_v2_5_F2	~4 mln	PBMC	6504811	963654	322595	TCR alpha seq
M1	2	5	M1_v2_5_F2	~4 mln	PBMC	6371333	1055201	377589	TCR beta seq
M1	2	5	M1_v2_5_CD4	~1 mln	CD4+	2523995	557137	281044	TCR alpha seq
M1	2	5	M1_v2_5_CD4	~1 mln	CD4+	2562653	682976	345695	TCR beta seq
M1	2	5	M1_v2_5_CD8	~1 mln	CD8+	2543922	574861	127203	TCR alpha seq
M1	2	5	M1_v2_5_CD8	~1 mln	CD8+	1983126	646030	142994	TCR beta seq
M1	2	10	M1_v2_10_F1	~4 mln	PBMC	6774128	1284754	460459	TCR alpha seq
M1	2	10	M1_v2_10_F1	~4 mln	PBMC	6652475	1479105	571330	TCR beta seq
M1	2	10	M1_v2_10_F2	~4 mln	PBMC	5932308	1282652	459955	TCR alpha seq
M1	2	10	M1_v2_10_F2	~4 mln	PBMC	4946870	1457800	569893	TCR beta seq
M1	2	10	M1_v2_10_CD4	~1 mln	CD4+	2718097	364247	204339	TCR alpha seq
M1	2	10	M1_v2_10_CD4	~1 mln	CD4+	3210904	416576	237739	TCR beta seq
M1	2	10	M1_v2_10_CD8	~1 mln	CD8+	4055164	372108	99613	TCR alpha seq
M1	2	10	M1_v2_10_CD8	~1 mln	CD8+	2204834	421161	106734	TCR beta seq
M1	2	15	M1_v2_15_F1	~4 mln	PBMC	8188326	786419	326750	TCR alpha seq
M1	2	15	M1_v2_15_F1	~4 mln	PBMC	6446855	803300	357771	TCR beta seq
M1	2	15	M1_v2_15_F2	~4 mln	PBMC	8405035	506132	235288	TCR alpha seq
M1	2	15	M1_v2_15_F2	~4 mln	PBMC	8304820	504669	248318	TCR beta seq
M1	2	15	M1_v2_15_CD4	~1 mln	CD4+	2573616	741552	348243	TCR alpha seq
M1	2	15	M1_v2_15_CD4	~1 mln	CD4+	2521963	867586	418114	TCR beta seq
M1	2	15	M1_v2_15_CD8	~1 mln	CD8+	2514378	675027	169158	TCR alpha seq
M1	2	15	M1_v2_15_CD8	~1 mln	CD8+	2953112	840008	205557	TCR beta seq
M1	2	45	M1_v2_45_F1	~4 mln	PBMC	5222312	1187313	438475	TCR alpha seq
M1	2	45	M1_v2_45_F1	~4 mln	PBMC	6131174	1339208	533758	TCR beta seq
M1	2	45	M1_v2_45_F2	~4 mln	PBMC	6082676	1363912	467431	TCR alpha seq
M1	2	45	M1_v2_45_F2	~4 mln	PBMC	7421728	1631287	591344	TCR beta seq
M1	2	45	M1_v2_45_CD4	~1 mln	CD4+	2087060	726025	327965	TCR alpha seq
M1	2	45	M1_v2_45_CD4	~1 mln	CD4+	2548972	917140	409914	TCR beta seq
M1	2	45	M1_v2_45_CD8	~1 mln	CD8+	2672716	701110	159731	TCR alpha seq
M1	2	45	M1_v2_45_CD8	~1 mln	CD8+	2959858	874612	195704	TCR beta seq
P30	2	0	P30_0_F1	~4 mln	PBMC	3136044	1023608	482671	TCR alpha seq
P30	2	0	P30_0_F1	~4 mln	PBMC	3548289	1240401	657089	TCR beta seq
P30	2	0	P30_0_F2	~4 mln	PBMC	3022765	996770	472542	TCR alpha seq
P30	2	0	P30_0_F2	~4 mln	PBMC	3846212	1162816	621945	TCR beta seq
P30	2	0	P30_0_CD4	~1 mln	CD4+	3484442	282941	197366	TCR alpha seq
P30	2	0	P30_0_CD4	~1 mln	CD4+	2587737	321819	231430	TCR beta seq
P30	2	0	P30_0_CD8	~1 mln	CD8+	2992761	208364	60913	TCR alpha seq
P30	2	0	P30_0_CD8	~1 mln	CD8+	1596710	232850	73602	TCR beta seq
P30	2	0	P30_0_P4	~38 000	CD3+CD45RA-CCR7+	550338	12508	9654	TCR alpha seq
P30	2	0	P30_0_P4	~38 000	CD3+CD45RA-CCR7+	913400	15987	10717	TCR beta seq
P30	2	0	P30_0_P5	~230 000	CD3+CD45RA-CCR7-	730594	61701	24865	TCR alpha seq
P30	2	0	P30_0_P5	~230 000	CD3+CD45RA-CCR7-	812266	85869	28348	TCR beta seq
P30	2	0	P30_0_P6	~110 000	CD3+CD45RA+CCR7-	1266521	40591	2713	TCR alpha seq
P30	2	0	P30_0_P6	~110 000	CD3+CD45RA+CCR7-	1082579	36826	3270	TCR beta seq
P30	2	0	P30_0_P7	~230	CD3+CD45RA+CCR7+CD95+	190	NA	18	RNAseq
P30	2	0	P30_0_P7	~230	CD3+CD45RA+CCR7+CD95+	204	NA	16	RNAseq
P30	2	5	P30_5_F1	~4 mln	PBMC	3311021	335139	199884	TCR alpha seq
P30	2	5	P30_5_F1	~4 mln	PBMC	5054740	436731	282653	TCR beta seq
P30	2	5	P30_5_F2	~4 mln	PBMC	3002899	438316	248514	TCR alpha seq
P30	2	5	P30_5_F2	~4 mln	PBMC	4290357	565288	353105	TCR beta seq
P30	2	5	P30_5_CD4	~1 mln	CD4+	3332866	135520	107214	TCR alpha seq
P30	2	5	P30_5_CD4	~1 mln	CD4+	2420198	161282	129741	TCR beta seq
P30	2	5	P30_5_CD8	~1 mln	CD8+	3174925	67443	23324	TCR alpha seq
P30	2	5	P30_5_CD8	~1 mln	CD8+	2464740	74862	27824	TCR beta seq
P30	2	10	P30_10_F1	~4 mln	PBMC	3322691	617756	318494	TCR alpha seq
P30	2	10	P30_10_F1	~4 mln	PBMC	4342257	819542	458455	TCR beta seq
P30	2	10	P30_10_F2	~4 mln	PBMC	3289807	601901	315246	TCR alpha seq
P30	2	10	P30_10_F2	~4 mln	PBMC	4213449	763254	443261	TCR beta seq
P30	2	10	P30_10_CD4	~1 mln	CD4+	3053833	126151	98263	TCR alpha seq
P30	2	10	P30_10_CD4	~1 mln	CD4+	2322812	171972	133664	TCR beta seq
P30	2	10	P30_10_CD8	~1 mln	CD8+	3651835	57170	20895	TCR alpha seq
P30	2	10	P30_10_CD8	~1 mln	CD8+	2153599	65413	26948	TCR beta seq
P30	2	15	P30_15_F1	~4 mln	PBMC	3132011	1096848	544537	TCR alpha seq
P30	2	15	P30_15_F1	~4 mln	PBMC	3735828	1231032	722016	TCR beta seq
P30	2	15	P30_15_F2	~4 mln	PBMC	3452967	1103225	554220	TCR alpha seq
P30	2	15	P30_15_F2	~4 mln	PBMC	4066075	1184939	707003	TCR beta seq
P30	2	15	P30_15_CD4	~1 mln	CD4+	3475010	246539	177425	TCR alpha seq
P30	2	15	P30_15_CD4	~1 mln	CD4+	2495570	334148	243960	TCR beta seq
P30	2	15	P30_15_CD8	~1 mln	CD8+	3553322	134181	47083	TCR alpha seq
P30	2	15	P30_15_CD8	~1 mln	CD8+	2490734	153222	59650	TCR beta seq
P30	2	15	P30_15_P3	~90 000	CD3+CD45RA+CCR7+	1059883	13314	11460	TCR alpha seq
P30	2	15	P30_15_P3	~90 000	CD3+CD45RA+CCR7+	1039369	17013	14212	TCR beta seq
P30	2	15	P30_15_P4	~20 000	CD3+CD45RA-CCR7+	1122837	5064	3690	TCR alpha seq
P30	2	15	P30_15_P4	~20 000	CD3+CD45RA-CCR7+	999292	6268	4308	TCR beta seq
P30	2	15	P30_15_P5	~200 000	CD3+CD45RA-CCR7-	1115797	32975	20007	TCR alpha seq
P30	2	15	P30_15_P5	~200 000	CD3+CD45RA-CCR7-	975852	43633	23656	TCR beta seq
P30	2	15	P30_15_P6	~65 000	CD3+CD45RA+CCR7-	1511746	14996	3404	TCR alpha seq
P30	2	15	P30_15_P6	~65 000	CD3+CD45RA+CCR7-	842981	13907	4308	TCR beta seq
P30	2	45	P30_45_F1	~4 mln	PBMC	3281375	912940	534918	TCR alpha seq
P30	2	45	P30_45_F1	~4 mln	PBMC	4025378	1226039	799632	TCR beta seq
P30	2	45	P30_45_F2	~4 mln	PBMC	3448739	906942	509397	TCR alpha seq
P30	2	45	P30_45_F2	~4 mln	PBMC	3734564	1210279	769020	TCR beta seq
P30	2	45	P30_45_CD4	~1 mln	CD4+	3413865	254275	191135	TCR alpha seq
P30	2	45	P30_45_CD4	~1 mln	CD4+	1578907	355026	277859	TCR beta seq
P30	2	45	P30_45_CD8	~1 mln	CD8+	3506007	175268	82215	TCR alpha seq
P30	2	45	P30_45_CD8	~1 mln	CD8+	2510759	213971	108724	TCR beta seq
P30	2	45	P30_45_P4	~85 000	CD3+CD45RA-CCR7+	1180568	18188	14106	TCR alpha seq
P30	2	45	P30_45_P4	~85 000	CD3+CD45RA-CCR7+	1007513	26362	18487	TCR beta seq
P30	2	45	P30_45_P5	~400 000	CD3+CD45RA-CCR7-	1334288	67716	37200	TCR alpha seq
P30	2	45	P30_45_P5	~400 000	CD3+CD45RA-CCR7-	773859	87043	43399	TCR beta seq
P30	2	45	P30_45_P6	~250 000	CD3+CD45RA+CCR7-	1392325	28025	8226	TCR alpha seq
P30	2	45	P30_45_P6	~250 000	CD3+CD45RA+CCR7-	1011062	28488	11404	TCR beta seq
P30	2	45	P30_45_P7	~2500	CD3+CD45RA+CCR7+CD95+	1935	NA	1016	RNAseq
P30	2	45	P30_45_P7	~2500	CD3+CD45RA+CCR7+CD95+	3865	NA	1499	RNAseq
P30	2	45	P30_45_Tet+	~180	CD3+CD8+A02-NS4B214-222+	1424	NA	180	RNAseq
P30	2	45	P30_45_Tet+	~180	CD3+CD8+A02-NS4B214-222+	2463	NA	229	RNAseq
P30	2	45	P30_45_Tet-	~400 000	CD3+CD8+A02-NS4B214-222-	1346384	54284	32614	TCR alpha seq
P30	2	45	P30_45_Tet-	~400 000	CD3+CD8+A02-NS4B214-222-	944961	66305	41704	TCR beta seq
