# Supplementary material for: Primary and secondary anti-viral response captured by the dynamics and phenotype of individual T cell clones
Source: eLife journal article supplement (doi:10.7554/elife.53704), 2020-02-21
Supplement: supp [file elife-53704-supp-v1.zip › elife_poa_e53704_Figure_1_source_data_2.csv]

	d5	d10	d15	d45
P30_alpha	66	111	121	43
P30_beta	44	125	125	63
M1_alpha	32	910	1273	256
M1_beta	42	855	1354	323
