# Supplementary material for: Primary and secondary anti-viral response captured by the dynamics and phenotype of individual T cell clones
Source: eLife journal article supplement (doi:10.7554/elife.53704), 2020-02-21
Supplement: supp [file elife-53704-supp-v1.zip › elife_poa_e53704_Figure_1_source_data_3.xlsx]

## Sheet: edgeR TCRalpha donor M1
	CDR3.nucleotide.sequence	bestVGene	bestDGene	bestJGene	bestVFamily	bestJFamily	CDR3.amino.acid.sequence	nSeqCDR3	refPoints	phen
1	TGTGCTGCTCCGACGATGGATAGCAGCTATAAATTGATCTTC	TRAV21	0	TRAJ12	TRAV21	TRAJ12	CAAPTMDSSYKLIF	TGTGCTGCTCCGACGATGGATAGCAGCTATAAATTGATCTTC	:::::::::0:-5:7:::::14:-1:42:::	CD4
2	TGTGTGGTGACCGACAGAGGCTCAACCCTGGGGAGGCTATACTTT	TRAV10	0	TRAJ18	TRAV10	TRAJ18	CVVTDRGSTLGRLYF	TGTGTGGTGACCGACAGAGGCTCAACCCTGGGGAGGCTATACTTT	:::::::::0:0:13:::::10:0:45:::	CD8
3	TGTGCAGCAAGTCCCCCCCCGAGGGAAGACTACAAGCTCAGCTTT	TRAV13-1	0	TRAJ20	TRAV13	TRAJ20	CAASPPPREDYKLSF	TGTGCAGCAAGTCCCCCCCCGAGGGAAGACTACAAGCTCAGCTTT	:::::::::0:-1:12:::::27:-8:45:::	CD8
4	TGTGCAGCAAGAATGAACACCGACAAGCTCATCTTT	TRAV29DV5	0	TRAJ34	TRAV29	TRAJ34	CAARMNTDKLIF	TGTGCAGCAAGAATGAACACCGACAAGCTCATCTTT	:::::::::0:-2:11:::::15:-6:36:::	CD8
5	TGTGCAACCTATTCTGGTGGCTACAATAAGCTGATTTTT	TRAV12-3	0	TRAJ4	TRAV12	TRAJ4	CATYSGGYNKLIF	TGTGCAACCTATTCTGGTGGCTACAATAAGCTGATTTTT	:::::::::0:-6:7:::::11:-4:39:::	CD4
6	TGTGCCGTGAACATCCTCCTAGAATCTAACTTTGGAAATGAGAAATTAACCTTT	TRAV12-2	0	TRAJ48	TRAV12	TRAJ48	CAVNILLESNFGNEKLTF	TGTGCCGTGAACATCCTCCTAGAATCTAACTTTGGAAATGAGAAATTAACCTTT	:::::::::0:0:13:::::23:-1:54:::	CD4
7	TGTGCTCTCGCTTCTGGTGGTACTAGCTATGGAAAGCTGACATTT	TRAV9-2	0	TRAJ52	TRAV9	TRAJ52	CALASGGTSYGKLTF	TGTGCTCTCGCTTCTGGTGGTACTAGCTATGGAAAGCTGACATTT	:::::::::0:-6:8:::::13:-6:45:::	CD4
8	TGTGCTGTGAGAGACATTCGGGGAACCTACAAATACATCTTT	TRAV3	0	TRAJ40	TRAV3	TRAJ40	CAVRDIRGTYKYIF	TGTGCTGTGAGAGACATTCGGGGAACCTACAAATACATCTTT	:::::::::0:0:16:::::21:-9:42:::	CD8
9	TGTGCAGCAAGCCCCTCGGATGACAAGATCATCTTT	TRAV29DV5	0	TRAJ30	TRAV29	TRAJ30	CAASPSDDKIIF	TGTGCAGCAAGCCCCTCGGATGACAAGATCATCTTT	:::::::::0:-1:12:::::18:-8:36:::	CD8
10	TGCATCCTGAGAGACCGGTGGCATTCAGGATACAGCACCCTCACCTTT	TRAV26-2	0	TRAJ11	TRAV26	TRAJ11	CILRDRWHSGYSTLTF	TGCATCCTGAGAGACCGGTGGCATTCAGGATACAGCACCCTCACCTTT	:::::::::0:0:15:::::22:-3:48:::	CD4
11	TGTGCTGTGTGTAAGACGGGCAGGAGAGCACTTACTTTT	TRAV21	0	TRAJ5	TRAV21	TRAJ5	CAVCKTGRRALTF	TGTGCTGTGTGTAAGACGGGCAGGAGAGCACTTACTTTT	:::::::::0:-3:9:::::15:-5:39:::	CD8
12	TGTGCAGAGAATTTAACCGGTGGTACTAGCTATGGAAAGCTGACATTT	TRAV13-2	0	TRAJ52	TRAV13	TRAJ52	CAENLTGGTSYGKLTF	TGTGCAGAGAATTTAACCGGTGGTACTAGCTATGGAAAGCTGACATTT	:::::::::0:-1:12:::::18:-8:48:::	CD4
13	TGTGCAGCACCTTTGGGCACAGGCTTTCAGAAACTTGTATTT	TRAV13-1	0	TRAJ8	TRAV13	TRAJ8	CAAPLGTGFQKLVF	TGTGCAGCACCTTTGGGCACAGGCTTTCAGAAACTTGTATTT	:::::::::0:-4:9:::::17:-4:42:::	CD4
14	TGTGCAGCAAGTGGGGTGTATGGAAACAAACTGGTCTTT	TRAV13-1	0	TRAJ47	TRAV13	TRAJ47	CAASGVYGNKLVF	TGTGCAGCAAGTGGGGTGTATGGAAACAAACTGGTCTTT	:::::::::0:-1:12:::::18:-5:39:::	CD4
15	TGCGGCACAGAGAGCCAGGGAGGAAAGCTTATCTTC	TRAV30	0	TRAJ23	TRAV30	TRAJ23	CGTESQGGKLIF	TGCGGCACAGAGAGCCAGGGAGGAAAGCTTATCTTC	:::::::::0:0:13:::::14:-10:36:::	CD4
16	TGCCTCGTGTATTCTCGCGGGGGAGGAAAGCTTATCTTC	TRAV4	0	TRAJ23	TRAV4	TRAJ23	CLVYSRGGGKLIF	TGCCTCGTGTATTCTCGCGGGGGAGGAAAGCTTATCTTC	:::::::::0:-7:9:::::20:-13:39:::	CD4
17	TGTGCAGCAACCCCGGGCAACTTCAACAAATTTTACTTT	TRAV13-1	0	TRAJ21	TRAV13	TRAJ21	CAATPGNFNKFYF	TGTGCAGCAACCCCGGGCAACTTCAACAAATTTTACTTT	:::::::::0:-3:10:::::17:-2:39:::	CD4
18	TGTGCTGGGGGCTATGGTCAGAATTTTGTCTTT	TRAV20	0	TRAJ26	TRAV20	TRAJ26	CAGGYGQNFVF	TGTGCTGGGGGCTATGGTCAGAATTTTGTCTTT	:::::::::0:-6:7:::::11:-7:33:::	CD8
19	TGTGCTGGATCCGTTCAGGGAGCCCAGAAGCTGGTATTT	TRAV35	0	TRAJ54	TRAV35	TRAJ54	CAGSVQGAQKLVF	TGTGCTGGATCCGTTCAGGGAGCCCAGAAGCTGGTATTT	:::::::::0:-4:8:::::13:-3:39:::	CD4
20	TGTGCTGACATGGATAGCAACTATCAGTTAATCTGG	TRAV1-2	0	TRAJ33	TRAV1	TRAJ33	CADMDSNYQLIW	TGTGCTGACATGGATAGCAACTATCAGTTAATCTGG	:::::::::0:-7:7:::::8:2:36:::	CD8
21	TGTGCAGCATACGGGAACACCGGTAACCAGTTCTATTTT	TRAV13-1	0	TRAJ49	TRAV13	TRAJ49	CAAYGNTGNQFYF	TGTGCAGCATACGGGAACACCGGTAACCAGTTCTATTTT	:::::::::0:-4:9:::::14:0:39:::	CD4
22	TGCGCTGTGAGGTCAATGAACACAGGCTTTCAGAAACTTGTATTT	TRAV1-1	0	TRAJ8	TRAV1	TRAJ8	CAVRSMNTGFQKLVF	TGCGCTGTGAGGTCAATGAACACAGGCTTTCAGAAACTTGTATTT	:::::::::0:-3:11:::::15:1:45:::	CD4
23	TGTGCTTATAGGGGCTTAATATCTAACTTTGGAAATGAGAAATTAACCTTT	TRAV38-2DV8	0	TRAJ48	TRAV38	TRAJ48	CAYRGLISNFGNEKLTF	TGTGCTTATAGGGGCTTAATATCTAACTTTGGAAATGAGAAATTAACCTTT	:::::::::0:-1:15:::::18:1:51:::	CD8
24	TGTGCAATGAGCGAGGGTAGCAACTATCAGTTAATCTGG	TRAV12-3	0	TRAJ33	TRAV12	TRAJ33	CAMSEGSNYQLIW	TGTGCAATGAGCGAGGGTAGCAACTATCAGTTAATCTGG	:::::::::0:0:13:::::14:-1:39:::	CD4
25	TGTGCTTATAGGAGCGCATACAACTTCAACAAATTTTACTTT	TRAV38-2DV8	0	TRAJ21	TRAV38	TRAJ21	CAYRSAYNFNKFYF	TGTGCTTATAGGAGCGCATACAACTTCAACAAATTTTACTTT	:::::::::0:0:16:::::17:1:42:::	CD4
26	TGTGCTGTGAGTGATGGCTTTGGAAATGAGAAATTAACCTTT	TRAV8-4	0	TRAJ48	TRAV8	TRAJ48	CAVSDGFGNEKLTF	TGTGCTGTGAGTGATGGCTTTGGAAATGAGAAATTAACCTTT	:::::::::0:0:14:::::17:-7:42:::	CD4
27	TGTGCAGCAAGCGCGGAAACCTCAGGAACCTACAAATACATCTTT	TRAV29DV5	0	TRAJ40	TRAV29	TRAJ40	CAASAETSGTYKYIF	TGTGCAGCAAGCGCGGAAACCTCAGGAACCTACAAATACATCTTT	:::::::::0:0:13:::::18:-3:45:::	CD8
28	TGTGCTCTAGGGTCAACACAGGCAAACTAATCTTT	TRAV6	0	TRAJ37	TRAV6	TRAJ37	CALGST_GKLIF	TGTGCTCTAGGGTCAACACAGGCAAACTAATCTTT	:::::::::0:-3:10:::::13:-9:35:::	CD4
29	TGTGCTGTTAACACCAATGCAGGCAAATCAACCTTT	TRAV21	0	TRAJ27	TRAV21	TRAJ27	CAVNTNAGKSTF	TGTGCTGTTAACACCAATGCAGGCAAATCAACCTTT	:::::::::0:-4:8:::::8:0:36:::	CD4
30	TGTGCCGTGAAATGGGCCGGTAACCAGTTCTATTTT	TRAV12-2	0	TRAJ49	TRAV12	TRAJ49	CAVKWAGNQFYF	TGTGCCGTGAAATGGGCCGGTAACCAGTTCTATTTT	:::::::::0:-2:11:::::16:-5:36:::	CD8
31	TGTGCCGTGGATAATACTGGAGGCTTCAAAACTATCTTT	TRAV12-2	0	TRAJ9	TRAV12	TRAJ9	CAVDNTGGFKTIF	TGTGCCGTGGATAATACTGGAGGCTTCAAAACTATCTTT	:::::::::0:-4:9:::::8:0:39:::	CD4
32	TGTGCTGTGGTGAATAGCAACTATCAGTTAATCTGG	TRAV1-2	0	TRAJ33	TRAV1	TRAJ33	CAVVNSNYQLIW	TGTGCTGTGGTGAATAGCAACTATCAGTTAATCTGG	:::::::::0:-5:9:::::10:0:36:::	CD8
33	TGTGCCGTGGGAGATGACAAGATCATCTTT	TRAV12-2	0	TRAJ30	TRAV12	TRAJ30	CAVGDDKIIF	TGTGCCGTGGGAGATGACAAGATCATCTTT	:::::::::0:-4:9:::::10:-6:30:::	CD8
34	TGTGCCGCGTATACTGGAGGCTTCAAAACTATCTTT	TRAV12-2	0	TRAJ9	TRAV12	TRAJ9	CAAYTGGFKTIF	TGTGCCGCGTATACTGGAGGCTTCAAAACTATCTTT	:::::::::0:-6:7:::::10:-4:36:::	CD8
35	TGTGCCGTGAGTGATGACAAGATCATCTTT	TRAV12-2	0	TRAJ30	TRAV12	TRAJ30	CAVSDDKIIF	TGTGCCGTGAGTGATGACAAGATCATCTTT	:::::::::0:-3:10:::::9:-5:30:::	CD8
36	TGTGCAGCACAACGGGGGAATGCAGGCAACATGCTCACCTTT	TRAV23DV6	0	TRAJ39	TRAV23	TRAJ39	CAAQRGNAGNMLTF	TGTGCAGCACAACGGGGGAATGCAGGCAACATGCTCACCTTT	:::::::::0:-4:9:::::18:-8:42:::	CD4
37	TGTGCTTTCATGAAGTGGGACGGATCTGAAAAGCTGGTCTTT	TRAV38-1	0	TRAJ57	TRAV38	TRAJ57	CAFMKWDGSEKLVF	TGTGCTTTCATGAAGTGGGACGGATCTGAAAAGCTGGTCTTT	:::::::::0:-2:15:::::16:-7:42:::	CD8
38	TGTGCAGCAAGTGGGGCCCTTAGGAACCAGGGAGGAAAGCTTATCTTC	TRAV13-1	0	TRAJ23	TRAV13	TRAJ23	CAASGALRNQGGKLIF	TGTGCAGCAAGTGGGGCCCTTAGGAACCAGGGAGGAAAGCTTATCTTC	:::::::::0:-1:12:::::24:-8:48:::	CD8
39	TGTGCGGGGGCCAAGGAGGAAGGTGCTGACGGACTCACCTTT	TRAV25	0	TRAJ45	TRAV25	TRAJ45	CAGAKEEGADGLTF	TGTGCGGGGGCCAAGGAGGAAGGTGCTGACGGACTCACCTTT	:::::::::0:0:9:::::13:-7:42:::	CD8
40	TGTGCCGTGAACGGTGACAAGATCATCTTT	TRAV12-2	0	TRAJ30	TRAV12	TRAJ30	CAVNGDKIIF	TGTGCCGTGAACGGTGACAAGATCATCTTT	:::::::::0:-1:12:::::14:-10:30:::	CD8
41	TGTGCAGGGCGAAAAGCTGCAGGCAACAAGCTAACTTTT	TRAV25	0	TRAJ17	TRAV25	TRAJ17	CAGRKAAGNKLTF	TGTGCAGGGCGAAAAGCTGCAGGCAACAAGCTAACTTTT	:::::::::0:0:9:::::12:-5:39:::	CD8
42	TGTGCTGTGAGTGAGGACTCTAAGACTGGAGGCTTCAAAACTATCTTT	TRAV8-4	0	TRAJ9	TRAV8	TRAJ9	CAVSEDSKTGGFKTIF	TGTGCTGTGAGTGAGGACTCTAAGACTGGAGGCTTCAAAACTATCTTT	:::::::::0:0:14:::::21:-3:48:::	CD8
43	TGTGCCGTGGAGGCCGACAAGCTCATCTTT	TRAV12-2	0	TRAJ34	TRAV12	TRAJ34	CAVEADKLIF	TGTGCCGTGGAGGCCGACAAGCTCATCTTT	:::::::::0:-4:9:::::13:-10:30:::	CD8
44	TGTGCCGTGACGGATGACAAGATCATCTTT	TRAV12-2	0	TRAJ30	TRAV12	TRAJ30	CAVTDDKIIF	TGTGCCGTGACGGATGACAAGATCATCTTT	:::::::::0:-3:10:::::12:-8:30:::	CD8
45	TGTGCTGTGCGGGATGGAGGCTTCAAAACTATCTTT	TRAV21	0	TRAJ9	TRAV21	TRAJ9	CAVRDGGFKTIF	TGTGCTGTGCGGGATGGAGGCTTCAAAACTATCTTT	:::::::::0:0:12:::::14:-8:36:::	CD8
46	TGTGCTGTGAGGCCGTTTTCTGGGAGGGGTTACCAGAAAGTTACCTTT	TRAV21	0	TRAJ13	TRAV21	TRAJ13	CAVRPFSGRGYQKVTF	TGTGCTGTGAGGCCGTTTTCTGGGAGGGGTTACCAGAAAGTTACCTTT	:::::::::0:0:12:::::25:-9:48:::	CD8
47	TGTGCCGTGGGCGATGACAAGATCATCTTT	TRAV12-2	0	TRAJ30	TRAV12	TRAJ30	CAVGDDKIIF	TGTGCCGTGGGCGATGACAAGATCATCTTT	:::::::::0:-4:9:::::12:-8:30:::	CD8
48	TGTGCAGCAGTATCCCAAAATAACAATGCCAGACTCATGTTT	TRAV13-1	0	TRAJ31	TRAV13	TRAJ31	CAAVSQNNNARLMF	TGTGCAGCAGTATCCCAAAATAACAATGCCAGACTCATGTTT	:::::::::0:0:12:::::18:-2:42:::	CD4
49	TGTGCTGTGAGTGATCAAGCAGGAGGAGGTGCTGACGGACTCACCTTT	TRAV8-4	0	TRAJ45	TRAV8	TRAJ45	CAVSDQAGGGADGLTF	TGTGCTGTGAGTGATCAAGCAGGAGGAGGTGCTGACGGACTCACCTTT	:::::::::0:0:14:::::19:-6:48:::	CD8
50	TGTGCTCTTGGGAACCGGGGTGGTGCTACAAACAAGCTCATCTTT	TRDV1	0	TRAJ32	TRDV1	TRAJ32	CALGNRGGATNKLIF	TGTGCTCTTGGGAACCGGGGTGGTGCTACAAACAAGCTCATCTTT	:::::::::0:-1:15:::::18:-8:45:::	CD8
51	TGTGCCGTGTCAGATGACAAGATCATCTTT	TRAV12-2	0	TRAJ30	TRAV12	TRAJ30	CAVSDDKIIF	TGTGCCGTGTCAGATGACAAGATCATCTTT	:::::::::0:-4:9:::::11:-7:30:::	CD8
52	TGTGCAGCAGGGAAACCCAACCCCCTAGAACTCACCTTT	TRAV13-1	0	TRAJ44	TRAV13	TRAJ44	CAAGKPNPLELTF	TGTGCAGCAGGGAAACCCAACCCCCTAGAACTCACCTTT	:::::::::0:-4:9:::::28:-21:39:::	CD8
53	TGCCTCGGCGGTTCATCAGGAGGAAGCTACATACCTACATTT	TRAV4	0	TRAJ6	TRAV4	TRAJ6	CLGGSSGGSYIPTF	TGCCTCGGCGGTTCATCAGGAGGAAGCTACATACCTACATTT	:::::::::0:-9:7:::::13:-2:42:::	CD8
54	TGTGTGGTGTCCACCGACAAGCTCATCTTT	TRAV12-1	0	TRAJ34	TRAV12	TRAJ34	CVVSTDKLIF	TGTGTGGTGTCCACCGACAAGCTCATCTTT	:::::::::0:-4:9:::::11:-8:30:::	CD8
55	TGTGCCGTGGCCGGAGGAAAGCTTATCTTC	TRAV12-2	0	TRAJ23	TRAV12	TRAJ23	CAVAGGKLIF	TGTGCCGTGGCCGGAGGAAAGCTTATCTTC	:::::::::0:-4:9:::::12:-14:30:::	CD8
56	TGCCTCGTGGGTGCCCCGATAGAAGAGGATAGCAACTATCAGTTAATCTGG	TRAV4	0	TRAJ33	TRAV4	TRAJ33	CLVGAPIEEDSNYQLIW	TGCCTCGTGGGTGCCCCGATAGAAGAGGATAGCAACTATCAGTTAATCTGG	:::::::::0:-3:13:::::26:-1:51:::	CD8
57	TGTGCCGTGAGCGCGGGCCAGTTCTATTTT	TRAV12-2	0	TRAJ49	TRAV12	TRAJ49	CAVSAGQFYF	TGTGCCGTGAGCGCGGGCCAGTTCTATTTT	:::::::::0:-3:10:::::17:-12:30:::	CD8
58	TGTGTGGTGAAAGCAGGCTTTGGAAATGAGAAATTAACCTTT	TRAV10	0	TRAJ48	TRAV10	TRAJ48	CVVKAGFGNEKLTF	TGTGTGGTGAAAGCAGGCTTTGGAAATGAGAAATTAACCTTT	:::::::::0:-3:10:::::17:-7:42:::	CD8
59	TGTGCCGTGAACAGCAACACCGACAAGCTCATCTTT	TRAV12-2	0	TRAJ34	TRAV12	TRAJ34	CAVNSNTDKLIF	TGTGCCGTGAACAGCAACACCGACAAGCTCATCTTT	:::::::::0:0:13:::::15:-6:36:::	CD8
60	TGCCTCGTGGGTGAAGGGGACAAGATCATCTTT	TRAV4	0	TRAJ30	TRAV4	TRAJ30	CLVGEGDKIIF	TGCCTCGTGGGTGAAGGGGACAAGATCATCTTT	:::::::::0:-2:14:::::18:-11:33:::	CD8
61	TGTGCCGTGATCGGGGATAGCAGCTATAAATTGATCTTC	TRAV12-2	0	TRAJ12	TRAV12	TRAJ12	CAVIGDSSYKLIF	TGTGCCGTGATCGGGGATAGCAGCTATAAATTGATCTTC	:::::::::0:-3:10:::::14:-4:39:::	CD8
62	TGTGCAGGAGTGCCCGACACCGGTAACCAGTTCTATTTT	TRAV27	0	TRAJ49	TRAV27	TRAJ49	CAGVPDTGNQFYF	TGTGCAGGAGTGCCCGACACCGGTAACCAGTTCTATTTT	:::::::::0:0:10:::::16:-2:39:::	CD8
63	TGTGCAGCATATCGGAACAGAGATGACAAGATCATCTTT	TRAV29DV5	0	TRAJ30	TRAV29	TRAJ30	CAAYRNRDDKIIF	TGTGCAGCATATCGGAACAGAGATGACAAGATCATCTTT	:::::::::0:-4:9:::::14:-1:39:::	CD8
64	TGTGCCGTCTCAGATGACAAGATCATCTTT	TRAV12-2	0	TRAJ30	TRAV12	TRAJ30	CAVSDDKIIF	TGTGCCGTCTCAGATGACAAGATCATCTTT	:::::::::0:-5:8:::::11:-7:30:::	CD8
65	TGTGCCGTGAACAGGGCAACTGACAGCTGGGGGAAATTGCAGTTT	TRAV12-2	0	TRAJ24	TRAV12	TRAJ24	CAVNRATDSWGKLQF	TGTGCCGTGAACAGGGCAACTGACAGCTGGGGGAAATTGCAGTTT	:::::::::0:0:13:::::16:-3:45:::	CD8
66	TGTGCTGTCGGAGTATCTGGTGGCTACAATAAGCTGATTTTT	TRAV20	0	TRAJ4	TRAV20	TRAJ4	CAVGVSGGYNKLIF	TGTGCTGTCGGAGTATCTGGTGGCTACAATAAGCTGATTTTT	:::::::::0:-5:8:::::15:-5:42:::	CD8
67	TGTGCTCTGAGTGAGGCGCAGGACGGCCAGAAGCTGCTCTTT	TRAV19	0	TRAJ16	TRAV19	TRAJ16	CALSEAQDGQKLLF	TGTGCTCTGAGTGAGGCGCAGGACGGCCAGAAGCTGCTCTTT	:::::::::0:0:17:::::21:-8:42:::	CD8
68	TGCATCGTCAGAAGGCAGGCAGGAACTGCTCTGATCTTT	TRAV26-1	0	TRAJ15	TRAV26	TRAJ15	CIVRRQAGTALIF	TGCATCGTCAGAAGGCAGGCAGGAACTGCTCTGATCTTT	:::::::::0:-4:12:::::15:-5:39:::	CD8
69	TGTGCAGGACTTTCTGGGGGTTACCAGAAAGTTACCTTT	TRAV27	0	TRAJ13	TRAV27	TRAJ13	CAGLSGGYQKVTF	TGTGCAGGACTTTCTGGGGGTTACCAGAAAGTTACCTTT	:::::::::0:-1:9:::::11:-4:39:::	CD8
70	TGTGTGGTGACCGATGACAAGATCATCTTT	TRAV12-1	0	TRAJ30	TRAV12	TRAJ30	CVVTDDKIIF	TGTGTGGTGACCGATGACAAGATCATCTTT	:::::::::0:-3:10:::::12:-8:30:::	CD8
71	TGTGCCGTGAACTCCGACTACAAGCTCAGCTTT	TRAV12-2	0	TRAJ20	TRAV12	TRAJ20	CAVNSDYKLSF	TGTGCCGTGAACTCCGACTACAAGCTCAGCTTT	:::::::::0:-1:12:::::14:-7:33:::	CD8
72	TGTGCTTTCAACTACGGTGGTACTAGCTATGGAAAGCTGACATTT	TRAV38-1	0	TRAJ52	TRAV38	TRAJ52	CAFNYGGTSYGKLTF	TGTGCTTTCAACTACGGTGGTACTAGCTATGGAAAGCTGACATTT	:::::::::0:-7:10:::::15:-8:45:::	CD4
73	TGTGCCGTGAACGGAGATGGCCAGAAGCTGCTCTTT	TRAV12-2	0	TRAJ16	TRAV12	TRAJ16	CAVNGDGQKLLF	TGTGCCGTGAACGGAGATGGCCAGAAGCTGCTCTTT	:::::::::0:-1:12:::::14:-7:36:::	CD8
74	TGTGTGGCCGCACTATTTTACAATAACAATGACATGCGCTTT	TRAV12-1	0	TRAJ43	TRAV12	TRAJ43	CVAALFYNNNDMRF	TGTGTGGCCGCACTATTTTACAATAACAATGACATGCGCTTT	:::::::::0:-6:7:::::13:6:42:::	CD8
75	TGTGTGGCCGACAGCTGGGGGAAATTGCAGTTT	TRAV12-1	0	TRAJ24	TRAV12	TRAJ24	CVADSWGKLQF	TGTGTGGCCGACAGCTGGGGGAAATTGCAGTTT	:::::::::0:-6:7:::::9:-8:33:::	CD8
76	TGTGCTGTGAGACATTATGGAGGAAGCCAAGGAAATCTCATCTTT	TRAV8-3	0	TRAJ42	TRAV8	TRAJ42	CAVRHYGGSQGNLIF	TGTGCTGTGAGACATTATGGAGGAAGCCAAGGAAATCTCATCTTT	:::::::::0:-5:9:::::13:-3:45:::	CD8
77	TGTGCCGTAAATACTGGAGGCTTCAAAACTATCTTT	TRAV12-2	0	TRAJ9	TRAV12	TRAJ9	CAVNTGGFKTIF	TGTGCCGTAAATACTGGAGGCTTCAAAACTATCTTT	:::::::::0:-2:11:::::4:2:36:::	CD4
78	TGTGCCGTGAGTGCTTCCAAGATAATCTTT	TRAV12-2	0	TRAJ3	TRAV12	TRAJ3	CAVSASKIIF	TGTGCCGTGAGTGCTTCCAAGATAATCTTT	:::::::::0:-3:10:::::9:-10:30:::	CD8
79	TGTGCTCTGGAGTCCCGAACTGGGGCAAACAACCTCTTCTTT	TRAV9-2	0	TRAJ36	TRAV9	TRAJ36	CALESRTGANNLFF	TGTGCTCTGGAGTCCCGAACTGGGGCAAACAACCTCTTCTTT	:::::::::0:-2:13:::::17:-3:42:::	CD8
80	TGTGCTGTGGGGGACTCTGGGGCTGGGAGTTACCAACTCACTTTC	TRAV22	0	TRAJ28	TRAV22	TRAJ28	CAVGDSGAGSYQLTF	TGTGCTGTGGGGGACTCTGGGGCTGGGAGTTACCAACTCACTTTC	:::::::::0:-3:10:::::13:-3:45:::	CD8
81	CTTAACACCAATGCAGGCAAATCAACCTTT	TRAV4	0	TRAJ27	TRAV4	TRAJ27	LNTNAGKSTF	CTTAACACCAATGCAGGCAAATCAACCTTT	:::::::::0:-16:0:::::2:0:30:::	CD8
82	TGTGCCGTGAACGGTGATGGCCAGAAGCTGCTCTTT	TRAV12-2	0	TRAJ16	TRAV12	TRAJ16	CAVNGDGQKLLF	TGTGCCGTGAACGGTGATGGCCAGAAGCTGCTCTTT	:::::::::0:-1:12:::::15:-8:36:::	CD8
83	TGTGCCGTGAGTCAAGCCAGACTCATGTTT	TRAV12-2	0	TRAJ31	TRAV12	TRAJ31	CAVSQARLMF	TGTGCCGTGAGTCAAGCCAGACTCATGTTT	:::::::::0:-3:10:::::12:-7:30:::	CD8
84	TGTGCTGTGCAGGGCAATGCTGGCAACAACCGTAAGCTGATTTGG	TRAV20	0	TRAJ38	TRAV20	TRAJ38	CAVQGNAGNNRKLIW	TGTGCTGTGCAGGGCAATGCTGGCAACAACCGTAAGCTGATTTGG	:::::::::0:0:13:::::15:-1:45:::	CD8
85	TGCCCCCTGAGTTCTGGGGGTTACCAGAAAGTTACCTTT	TRAV1-1	0	TRAJ13	TRAV1	TRAJ13	CPLSSGGYQKVTF	TGCCCCCTGAGTTCTGGGGGTTACCAGAAAGTTACCTTT	:::::::::0:-11:3:::::7:0:39:::	CD8
86	TGTGCCGTGAATCAACCCAGCTTT	TRAV12-2	0	TRAJ20	TRAV12	TRAJ20	CAVNQPSF	TGTGCCGTGAATCAACCCAGCTTT	:::::::::0:-2:11:::::17:-19:24:::	CD8
87	TGTGCCGTGGGGGATGACAAGATCATCTTT	TRAV12-2	0	TRAJ30	TRAV12	TRAJ30	CAVGDDKIIF	TGTGCCGTGGGGGATGACAAGATCATCTTT	:::::::::0:-4:9:::::12:-8:30:::	CD8
88	TGTGCAGAAAACAAAAACCGATATGGAAACAAACTGGTCTTT	TRAV29DV5	0	TRAJ47	TRAV29	TRAJ47	CAENKNRYGNKLVF	TGTGCAGAAAACAAAAACCGATATGGAAACAAACTGGTCTTT	:::::::::0:-3:10:::::20:-4:42:::	CD8
89	TGTGCTACGGACGAACGGATGGATAGCAGCTATAAATTGATCTTC	TRAV17	0	TRAJ12	TRAV17	TRAJ12	CATDERMDSSYKLIF	TGTGCTACGGACGAACGGATGGATAGCAGCTATAAATTGATCTTC	:::::::::0:0:13:::::15:1:45:::	CD8
90	TGTGCCGCTGCAGGCAACATGCTCACCTTT	TRAV12-2	0	TRAJ39	TRAV12	TRAJ39	CAAAGNMLTF	TGTGCCGCTGCAGGCAACATGCTCACCTTT	:::::::::0:-6:7:::::8:-10:30:::	CD8
91	TGTGTGGTGTCAGATGACAAGATCATCTTT	TRAV12-1	0	TRAJ30	TRAV12	TRAJ30	CVVSDDKIIF	TGTGTGGTGTCAGATGACAAGATCATCTTT	:::::::::0:-4:9:::::11:-7:30:::	CD8
92	TGCATCCTCGGATACAATAACAATGACATGCGCTTT	TRAV26-2	0	TRAJ43	TRAV26	TRAJ43	CILGYNNNDMRF	TGCATCCTCGGATACAATAACAATGACATGCGCTTT	:::::::::0:-7:8:::::12:1:36:::	CD8
93	TGTGCTACGGACCACGCCTATAACACCGACAAGCTCATCTTT	TRAV17	0	TRAJ34	TRAV17	TRAJ34	CATDHAYNTDKLIF	TGTGCTACGGACCACGCCTATAACACCGACAAGCTCATCTTT	:::::::::0:-1:12:::::18:-3:42:::	CD8
94	TGTGCTGTGACGGGAGGTTTCATGAAAACCTCCTACGACAAGGTGATATTT	TRAV21	0	TRAJ50	TRAV21	TRAJ50	CAVTGGFMKTSYDKVIF	TGTGCTGTGACGGGAGGTTTCATGAAAACCTCCTACGACAAGGTGATATTT	:::::::::0:-2:10:::::12:11:51:::	CD8
95	TGTGCAGCAAGCGTAGTTAAGGGAGGAAAGCTTATCTTC	TRAV29DV5	0	TRAJ23	TRAV29	TRAJ23	CAASVVKGGKLIF	TGTGCAGCAAGCGTAGTTAAGGGAGGAAAGCTTATCTTC	:::::::::0:0:13:::::19:-12:39:::	CD8
96	TGTGCCGTGGCAGATGACAAGATCATCTTT	TRAV12-2	0	TRAJ30	TRAV12	TRAJ30	CAVADDKIIF	TGTGCCGTGGCAGATGACAAGATCATCTTT	:::::::::0:-4:9:::::11:-7:30:::	CD8
97	TGTGCAGGGCTTCAGGGAGCCCAGAAGCTGGTATTT	TRAV25	0	TRAJ54	TRAV25	TRAJ54	CAGLQGAQKLVF	TGTGCAGGGCTTCAGGGAGCCCAGAAGCTGGTATTT	:::::::::0:0:9:::::10:-3:36:::	CD8
98	TGTGCTGGGCTAACCATGGAATATGGAAACAAACTGGTCTTT	TRAV35	0	TRAJ47	TRAV35	TRAJ47	CAGLTMEYGNKLVF	TGTGCTGGGCTAACCATGGAATATGGAAACAAACTGGTCTTT	:::::::::0:-2:10:::::13:3:42:::	CD8
99	TGTGCCGTGAATAACAATGACATGCGCTTT	TRAV12-2	0	TRAJ43	TRAV12	TRAJ43	CAVNNNDMRF	TGTGCCGTGAATAACAATGACATGCGCTTT	:::::::::0:-2:11:::::9:-2:30:::	CD8
100	TGTGCAGAGAGAACGGGAGGAGGAAACAAACTCACCTTT	TRAV13-2	0	TRAJ10	TRAV13	TRAJ10	CAERTGGGNKLTF	TGTGCAGAGAGAACGGGAGGAGGAAACAAACTCACCTTT	:::::::::0:-3:10:::::12:-6:39:::	CD8
101	TGTGCCGCGGGAGATGACAAGATCATCTTT	TRAV12-2	0	TRAJ30	TRAV12	TRAJ30	CAAGDDKIIF	TGTGCCGCGGGAGATGACAAGATCATCTTT	:::::::::0:-6:7:::::10:-6:30:::	CD8
102	TGTGCCGTGAACGCGAACACCGACAAGCTCATCTTT	TRAV12-2	0	TRAJ34	TRAV12	TRAJ34	CAVNANTDKLIF	TGTGCCGTGAACGCGAACACCGACAAGCTCATCTTT	:::::::::0:-1:12:::::15:-6:36:::	CD8
103	TGTGCAGGAGAAGGTATAAGAGGTGCTGACGGACTCACCTTT	TRAV27	0	TRAJ45	TRAV27	TRAJ45	CAGEGIRGADGLTF	TGTGCAGGAGAAGGTATAAGAGGTGCTGACGGACTCACCTTT	:::::::::0:0:10:::::19:-12:42:::	CD8
104	TGTGCCGTGACCAGCGATGACATGCGCTTT	TRAV12-2	0	TRAJ43	TRAV12	TRAJ43	CAVTSDDMRF	TGTGCCGTGACCAGCGATGACATGCGCTTT	:::::::::0:0:13:::::16:-9:30:::	CD8
105	TGTGCAGGAGCCCCGGTTTGGAACAATGACATGCGCTTT	TRAV27	0	TRAJ43	TRAV27	TRAJ43	CAGAPVWNNDMRF	TGTGCAGGAGCCCCGGTTTGGAACAATGACATGCGCTTT	:::::::::0:0:10:::::21:-5:39:::	CD8
106	TGCATCCGGCGTAGCAACTATCAGTTAATCTGG	TRAV26-2	0	TRAJ33	TRAV26	TRAJ33	CIRRSNYQLIW	TGCATCCGGCGTAGCAACTATCAGTTAATCTGG	:::::::::0:-8:7:::::11:-4:33:::	CD8
107	TGTGCCGTGATGGATGACAAGATCATCTTT	TRAV12-2	0	TRAJ30	TRAV12	TRAJ30	CAVMDDKIIF	TGTGCCGTGATGGATGACAAGATCATCTTT	:::::::::0:-3:10:::::12:-8:30:::	CD8
108	TGCCTCGTGGGTGCTCCTATGTTTTCTGGTGGCTACAATAAGCTGATTTTT	TRAV4	0	TRAJ4	TRAV4	TRAJ4	CLVGAPMFSGGYNKLIF	TGCCTCGTGGGTGCTCCTATGTTTTCTGGTGGCTACAATAAGCTGATTTTT	:::::::::0:-3:13:::::18:1:51:::	CD8
109	TGTGCCTTTTCAGATGACAAGATCATCTTT	TRAV12-2	0	TRAJ30	TRAV12	TRAJ30	CAFSDDKIIF	TGTGCCTTTTCAGATGACAAGATCATCTTT	:::::::::0:-7:6:::::11:-7:30:::	CD8
110	TGTGCCGTGACAGGCACCGACAAGCTCATCTTT	TRAV12-2	0	TRAJ34	TRAV12	TRAJ34	CAVTGTDKLIF	TGTGCCGTGACAGGCACCGACAAGCTCATCTTT	:::::::::0:-3:10:::::14:-8:33:::	CD8
111	TGTGCAGAGATCTATAACACCGACAAGCTCATCTTT	TRAV5	0	TRAJ34	TRAV5	TRAJ34	CAEIYNTDKLIF	TGTGCAGAGATCTATAACACCGACAAGCTCATCTTT	:::::::::0:-3:10:::::7:3:36:::	CD4
112	TGTGCCGTGGGGGACGACAAGGTGATATTT	TRAV12-2	0	TRAJ50	TRAV12	TRAJ50	CAVGDDKVIF	TGTGCCGTGGGGGACGACAAGGTGATATTT	:::::::::0:-4:9:::::13:-12:30:::	CD8
113	TGTGCTCCGAGGATGGATAGCAGCTATAAATTGATCTTC	TRAV16	0	TRAJ12	TRAV16	TRAJ12	CAPRMDSSYKLIF	TGTGCTCCGAGGATGGATAGCAGCTATAAATTGATCTTC	:::::::::0:-7:7:::::10:0:39:::	CD8
114	TGTGCAGGAGCGAGGGTTAGCAACTATCAGTTAATCTGG	TRAV27	0	TRAJ33	TRAV27	TRAJ33	CAGARVSNYQLIW	TGTGCAGGAGCGAGGGTTAGCAACTATCAGTTAATCTGG	:::::::::0:0:10:::::14:-1:39:::	CD8
115	TGTGCTACCGCAATGAACAGAGATGACAAGATCATCTTT	TRAV17	0	TRAJ30	TRAV17	TRAJ30	CATAMNRDDKIIF	TGTGCTACCGCAATGAACAGAGATGACAAGATCATCTTT	:::::::::0:-5:8:::::12:1:39:::	CD8
116	TGTGCAGCAAGCGCACGGACTGGGGCAAACAACCTCTTCTTT	TRAV29DV5	0	TRAJ36	TRAV29	TRAJ36	CAASARTGANNLFF	TGTGCAGCAAGCGCACGGACTGGGGCAAACAACCTCTTCTTT	:::::::::0:0:13:::::18:-4:42:::	CD8
117	TGTGCCGTGAACCGAGACGGTAACCAGTTCTATTTT	TRAV12-2	0	TRAJ49	TRAV12	TRAJ49	CAVNRDGNQFYF	TGTGCCGTGAACCGAGACGGTAACCAGTTCTATTTT	:::::::::0:-1:12:::::17:-6:36:::	CD8
118	TGTGCCGTTCAGGATGACAAGATCATCTTT	TRAV12-2	0	TRAJ30	TRAV12	TRAJ30	CAVQDDKIIF	TGTGCCGTTCAGGATGACAAGATCATCTTT	:::::::::0:-5:8:::::9:-4:30:::	CD8
119	TGTGCTGTGAGTGTAAATCCTCAGGCAGGAACTGCTCTGATCTTT	TRAV8-6	0	TRAJ15	TRAV8	TRAJ15	CAVSVNPQAGTALIF	TGTGCTGTGAGTGTAAATCCTCAGGCAGGAACTGCTCTGATCTTT	:::::::::0:-1:13:::::21:-5:45:::	CD8
120	TGTGCAGGAGAAAGGATAGGCTTTGGGAATGTGCTGCATTGC	TRAV27	0	TRAJ35	TRAV27	TRAJ35	CAGERIGFGNVLHC	TGTGCAGGAGAAAGGATAGGCTTTGGGAATGTGCTGCATTGC	:::::::::0:0:10:::::14:0:42:::	CD8
121	TGTGCCGTGAACACGGTGGGAGGAAAGCTTATCTTC	TRAV12-2	0	TRAJ23	TRAV12	TRAJ23	CAVNTVGGKLIF	TGTGCCGTGAACACGGTGGGAGGAAAGCTTATCTTC	:::::::::0:0:13:::::17:-13:36:::	CD8
122	TGTGCTTTCTGCTTTCGTTCTAACGACTACAAGCTCAGCTTT	TRAV21	0	TRAJ20	TRAV21	TRAJ20	CAFCFRSNDYKLSF	TGTGCTTTCTGCTTTCGTTCTAACGACTACAAGCTCAGCTTT	:::::::::0:-6:6:::::15:1:42:::	CD4
123	TGTGCAGCCCGGATGATGGATAGCAACTATCAGTTAATCTGG	TRAV25	0	TRAJ33	TRAV25	TRAJ33	CAARMMDSNYQLIW	TGTGCAGCCCGGATGATGGATAGCAACTATCAGTTAATCTGG	:::::::::0:-2:7:::::15:1:42:::	CD8
124	TGTGCTCTTCTCGACTACAAGCTCAGCTTT	TRAV9-2	0	TRAJ20	TRAV9	TRAJ20	CALLDYKLSF	TGTGCTCTTCTCGACTACAAGCTCAGCTTT	:::::::::0:-6:8:::::11:-7:30:::	CD8
125	TGTGCAGGCGTTCTCTCGAGGGATGACAAGATCATCTTT	TRAV27	0	TRAJ30	TRAV27	TRAJ30	CAGVLSRDDKIIF	TGTGCAGGCGTTCTCTCGAGGGATGACAAGATCATCTTT	:::::::::0:-2:8:::::18:-5:39:::	CD8
126	TGTGCTGTGAGAGGTCGGAGTGCAGGCAACATGCTCACCTTT	TRAV21	0	TRAJ39	TRAV21	TRAJ39	CAVRGRSAGNMLTF	TGTGCTGTGAGAGGTCGGAGTGCAGGCAACATGCTCACCTTT	:::::::::0:-1:11:::::20:-10:42:::	CD4
127	TGTGCCGCGCGGGTAAGCCAAGGAAATCTCATCTTT	TRAV12-2	0	TRAJ42	TRAV12	TRAJ42	CAARVSQGNLIF	TGTGCCGCGCGGGTAAGCCAAGGAAATCTCATCTTT	:::::::::0:-6:7:::::14:-13:36:::	CD4
128	TGTGCCGTGACCGGGGACAAGATCATCTTT	TRAV12-2	0	TRAJ30	TRAV12	TRAJ30	CAVTGDKIIF	TGTGCCGTGACCGGGGACAAGATCATCTTT	:::::::::0:-3:10:::::15:-11:30:::	CD8
129	TGTGTGGTGGCAGATGACAAGATCATCTTT	TRAV12-1	0	TRAJ30	TRAV12	TRAJ30	CVVADDKIIF	TGTGTGGTGGCAGATGACAAGATCATCTTT	:::::::::0:-4:9:::::11:-7:30:::	CD8
130	TGTGCCGTGGGCCTTTCTAACGACTACAAGCTCAGCTTT	TRAV12-2	0	TRAJ20	TRAV12	TRAJ20	CAVGLSNDYKLSF	TGTGCCGTGGGCCTTTCTAACGACTACAAGCTCAGCTTT	:::::::::0:-4:9:::::14:-1:39:::	CD8
131	TGTGCCGTGAGCACCGACAAGCTCATCTTT	TRAV12-2	0	TRAJ34	TRAV12	TRAJ34	CAVSTDKLIF	TGTGCCGTGAGCACCGACAAGCTCATCTTT	:::::::::0:0:13:::::11:-8:30:::	CD8
132	TGTGCAGCTATGCCCCAACGGAACAATGACATGCGCTTT	TRAV27	0	TRAJ43	TRAV27	TRAJ43	CAAMPQRNNDMRF	TGTGCAGCTATGCCCCAACGGAACAATGACATGCGCTTT	:::::::::0:-3:7:::::21:-5:39:::	CD8
133	TGTGCTGTGAGAGACCCTACCGGTAACCAGTTCTATTTT	TRAV3	0	TRAJ49	TRAV3	TRAJ49	CAVRDPTGNQFYF	TGTGCTGTGAGAGACCCTACCGGTAACCAGTTCTATTTT	:::::::::0:-1:15:::::18:-4:39:::	CD8
134	TGTGCTTACCCAAGCACCCAAAATGCAGGCAACATGCTCACCTTT	TRAV38-2DV8	0	TRAJ39	TRAV38	TRAJ39	CAYPSTQNAGNMLTF	TGTGCTTACCCAAGCACCCAAAATGCAGGCAACATGCTCACCTTT	:::::::::0:-8:8:::::21:-8:45:::	CD8
135	TGTGCCGTGAACATCAACACCGACAAGCTCATCTTT	TRAV12-2	0	TRAJ34	TRAV12	TRAJ34	CAVNINTDKLIF	TGTGCCGTGAACATCAACACCGACAAGCTCATCTTT	:::::::::0:0:13:::::15:-6:36:::	CD8
136	TGTGTTGTGAGTGACAAGGGTGGTACTAGCTATGGAAAGCTGACATTT	TRAV8-2	0	TRAJ52	TRAV8	TRAJ52	CVVSDKGGTSYGKLTF	TGTGTTGTGAGTGACAAGGGTGGTACTAGCTATGGAAAGCTGACATTT	:::::::::0:0:14:::::18:-8:48:::	CD8
137	TGTGCTGTGAGTGATACTGGAGGCTTCAAAACTATCTTT	TRAV8-4	0	TRAJ9	TRAV8	TRAJ9	CAVSDTGGFKTIF	TGTGCTGTGAGTGATACTGGAGGCTTCAAAACTATCTTT	:::::::::0:0:14:::::13:-4:39:::	CD4
138	TGTGCTACGCCTATACTCACGGGAGGAGGAAACAAACTCACCTTT	TRAV17	0	TRAJ10	TRAV17	TRAJ10	CATPILTGGGNKLTF	TGTGCTACGCCTATACTCACGGGAGGAGGAAACAAACTCACCTTT	:::::::::0:-4:9:::::11:1:45:::	CD8
139	TGTGCCGTGAGACCCGACAAGCTCATCTTT	TRAV12-2	0	TRAJ34	TRAV12	TRAJ34	CAVRPDKLIF	TGTGCCGTGAGACCCGACAAGCTCATCTTT	:::::::::0:-3:10:::::13:-10:30:::	CD8
140	TGTGTGGTGGATCCCCATGCCAGACTCATGTTT	TRAV12-1	0	TRAJ31	TRAV12	TRAJ31	CVVDPHARLMF	TGTGTGGTGGATCCCCATGCCAGACTCATGTTT	:::::::::0:-4:9:::::16:-9:33:::	CD8
141	TGTGCCGTGAAAATCGGGAAGAACACAGGCTTTCAGAAACTTGTATTT	TRAV12-2	0	TRAJ8	TRAV12	TRAJ8	CAVKIGKNTGFQKLVF	TGTGCCGTGAAAATCGGGAAGAACACAGGCTTTCAGAAACTTGTATTT	:::::::::0:-2:11:::::20:-1:48:::	CD8
142	TGTGTGGGGGGAGATGACAAGATCATCTTT	TRAV12-1	0	TRAJ30	TRAV12	TRAJ30	CVGGDDKIIF	TGTGTGGGGGGAGATGACAAGATCATCTTT	:::::::::0:-6:7:::::10:-6:30:::	CD8
143	TGTGGAGCAACCTACTCCCCCGGGTATGCACTCAACTTC	TRAV34	0	TRAJ41	TRAV34	TRAJ41	CGATYSPGYALNF	TGTGGAGCAACCTACTCCCCCGGGTATGCACTCAACTTC	:::::::::0:-4:9:::::19:-11:39:::	CD4
144	TGTGCCTTTCTAGATGACAAGATCATCTTT	TRAV12-2	0	TRAJ30	TRAV12	TRAJ30	CAFLDDKIIF	TGTGCCTTTCTAGATGACAAGATCATCTTT	:::::::::0:-7:6:::::11:-7:30:::	CD8
145	TGTGTGGTGGGGGACTACAAGCTCAGCTTT	TRAV12-1	0	TRAJ20	TRAV12	TRAJ20	CVVGDYKLSF	TGTGTGGTGGGGGACTACAAGCTCAGCTTT	:::::::::0:-4:9:::::12:-8:30:::	CD8
146	TGTGCAGCAACCCCGAACAGAGATGACAAGATCATCTTT	TRAV13-1	0	TRAJ30	TRAV13	TRAJ30	CAATPNRDDKIIF	TGTGCAGCAACCCCGAACAGAGATGACAAGATCATCTTT	:::::::::0:-3:10:::::14:-1:39:::	CD4
147	TGTGCCGCGGTAGATGACAAGATCATCTTT	TRAV12-2	0	TRAJ30	TRAV12	TRAJ30	CAAVDDKIIF	TGTGCCGCGGTAGATGACAAGATCATCTTT	:::::::::0:-6:7:::::11:-7:30:::	CD8
148	TGTGCAGGAACATGGATCAAAGCTGCAGGCAACAAGCTAACTTTT	TRAV27	0	TRAJ17	TRAV27	TRAJ17	CAGTWIKAAGNKLTF	TGTGCAGGAACATGGATCAAAGCTGCAGGCAACAAGCTAACTTTT	:::::::::0:-1:9:::::7:5:45:::	CD8
149	TGTGCTGGGCAGAGAGTGACCGTTGGCAGACTCATGTTT	TRAV35	0	TRAJ31	TRAV35	TRAJ31	CAGQRVTVGRLMF	TGTGCTGGGCAGAGAGTGACCGTTGGCAGACTCATGTTT	:::::::::0:0:12:::::23:-10:39:::	CD8
150	TGTGCCGTTTCTAACGACTACAAGCTCAGCTTT	TRAV12-2	0	TRAJ20	TRAV12	TRAJ20	CAVSNDYKLSF	TGTGCCGTTTCTAACGACTACAAGCTCAGCTTT	:::::::::0:-5:8:::::8:-1:33:::	CD8
151	TGTGCAGAGATAACTTCTGGGGCTGGGAGTTACCAACTCACTTTC	TRAV5	0	TRAJ28	TRAV5	TRAJ28	CAEITSGAGSYQLTF	TGTGCAGAGATAACTTCTGGGGCTGGGAGTTACCAACTCACTTTC	:::::::::0:-3:10:::::15:-5:45:::	CD8
152	TGTGCTTATAGGATCCTAAACACCGGTAACCAGTTCTATTTT	TRAV38-2DV8	0	TRAJ49	TRAV38	TRAJ49	CAYRILNTGNQFYF	TGTGCTTATAGGATCCTAAACACCGGTAACCAGTTCTATTTT	:::::::::0:-3:13:::::18:-1:42:::	CD4
153	TGTGCAGGAGCTCCCAACACCGACAAGCTCATCTTT	TRAV27	0	TRAJ34	TRAV27	TRAJ34	CAGAPNTDKLIF	TGTGCAGGAGCTCCCAACACCGACAAGCTCATCTTT	:::::::::0:0:10:::::15:-6:36:::	CD8
154	TGTGCAGCAAGTAGGTATGCTGGTGGTACTAGCTATGGAAAGCTGACATTT	TRAV13-1	0	TRAJ52	TRAV13	TRAJ52	CAASRYAGGTSYGKLTF	TGTGCAGCAAGTAGGTATGCTGGTGGTACTAGCTATGGAAAGCTGACATTT	:::::::::0:0:13:::::4:9:51:::	CD8
155	TGTGCCGTGAAAGATGACAAGATCATCTTT	TRAV12-2	0	TRAJ30	TRAV12	TRAJ30	CAVKDDKIIF	TGTGCCGTGAAAGATGACAAGATCATCTTT	:::::::::0:-2:11:::::11:-7:30:::	CD8
156	TGTGCTGTGAAAGGAGACAACTTCAACAAATTTTACTTT	TRAV22	0	TRAJ21	TRAV22	TRAJ21	CAVKGDNFNKFYF	TGTGCTGTGAAAGGAGACAACTTCAACAAATTTTACTTT	:::::::::0:-4:9:::::16:-1:39:::	CD4
157	TGTGCTCTGAGTGAGGCGATGAATTATGGAGGAAGCCAAGGAAATCTCATCTTT	TRAV19	0	TRAJ42	TRAV19	TRAJ42	CALSEAMNYGGSQGNLIF	TGTGCTCTGAGTGAGGCGATGAATTATGGAGGAAGCCAAGGAAATCTCATCTTT	:::::::::0:0:17:::::18:1:54:::	CD8
158	TGTGCTGGGGGACATTCCGGGTATGCACTCAACTTC	TRAV35	0	TRAJ41	TRAV35	TRAJ41	CAGGHSGYALNF	TGTGCTGGGGGACATTCCGGGTATGCACTCAACTTC	:::::::::0:-3:9:::::13:-8:36:::	CD4
159	TGTGCTCTGAGTGAGGATGGGGGTTACCAGAAAGTTACCTTT	TRAV9-2	0	TRAJ13	TRAV9	TRAJ13	CALSEDGGYQKVTF	TGTGCTCTGAGTGAGGATGGGGGTTACCAGAAAGTTACCTTT	:::::::::0:0:14:::::17:-7:42:::	CD4
160	TGTGCAGCAAGGGCAGGAACCTACAAATACATCTTT	TRAV29DV5	0	TRAJ40	TRAV29	TRAJ40	CAARAGTYKYIF	TGTGCAGCAAGGGCAGGAACCTACAAATACATCTTT	:::::::::0:-2:11:::::13:-7:36:::	CD8
161	TGTGTGGTGACCCCGAGGGGGTATGCACTCAACTTC	TRAV10	0	TRAJ41	TRAV10	TRAJ41	CVVTPRGYALNF	TGTGTGGTGACCCCGAGGGGGTATGCACTCAACTTC	:::::::::0:-3:10:::::18:-13:36:::	CD4
162	TGCCTCTTACCCTCTGGTGGCTACAATAAGCTGATTTTT	TRAV4	0	TRAJ4	TRAV4	TRAJ4	CLLPSGGYNKLIF	TGCCTCTTACCCTCTGGTGGCTACAATAAGCTGATTTTT	:::::::::0:-10:6:::::12:-5:39:::	CD8
163	TGTGCTCCTCCGGTCGCGGACATGCGCTTT	TRAV19	0	TRAJ43	TRAV19	TRAJ43	CAPPVADMRF	TGTGCTCCTCCGGTCGCGGACATGCGCTTT	:::::::::0:-10:7:::::18:-11:30:::	CD4
164	TGTGCTCTAAGGGGTTTCATGAATTCTGGGGGTTACCAGAAAGTTACCTTT	TRAV16	0	TRAJ13	TRAV16	TRAJ13	CALRGFMNSGGYQKVTF	TGTGCTCTAAGGGGTTTCATGAATTCTGGGGGTTACCAGAAAGTTACCTTT	:::::::::0:0:14:::::15:4:51:::	CD8
165	TGTGCAGTAGGAGATGACAAGATCATCTTT	TRAV13-1	0	TRAJ30	TRAV13	TRAJ30	CAVGDDKIIF	TGTGCAGTAGGAGATGACAAGATCATCTTT	:::::::::0:-6:7:::::10:-6:30:::	CD8
166	TGTGCTGTGAGGCCGGGGGAATATGGAAACAAACTGGTCTTT	TRAV21	0	TRAJ47	TRAV21	TRAJ47	CAVRPGEYGNKLVF	TGTGCTGTGAGGCCGGGGGAATATGGAAACAAACTGGTCTTT	:::::::::0:0:12:::::17:-1:42:::	CD8
167	TGTGCCGTCTTAGATGACAAGATCATCTTT	TRAV12-2	0	TRAJ30	TRAV12	TRAJ30	CAVLDDKIIF	TGTGCCGTCTTAGATGACAAGATCATCTTT	:::::::::0:-5:8:::::11:-7:30:::	CD8
168	TGTGCTGTGGACCGGATCAACCAGGCAGGAACTGCTCTGATCTTT	TRAV22	0	TRAJ15	TRAV22	TRAJ15	CAVDRINQAGTALIF	TGTGCTGTGGACCGGATCAACCAGGCAGGAACTGCTCTGATCTTT	:::::::::0:-2:11:::::17:-1:45:::	CD8
169	TGTGTGGTGTCCGATTCTGCTCTGATCTTT	TRAV12-1	0	TRAJ15	TRAV12	TRAJ15	CVVSDSALIF	TGTGTGGTGTCCGATTCTGCTCTGATCTTT	:::::::::0:-4:9:::::16:-15:30:::	CD8
170	TGTGCTGGCCCGATTTATAACCAGGGAGGAAAGCTTATCTTC	TRAV21	0	TRAJ23	TRAV21	TRAJ23	CAGPIYNQGGKLIF	TGTGCTGGCCCGATTTATAACCAGGGAGGAAAGCTTATCTTC	:::::::::0:-5:7:::::11:-1:42:::	CD8
171	TGTGCTGGGCGTACCATGGATAGCAACTATCAGTTAATCTGG	TRAV35	0	TRAJ33	TRAV35	TRAJ33	CAGRTMDSNYQLIW	TGTGCTGGGCGTACCATGGATAGCAACTATCAGTTAATCTGG	:::::::::0:-2:10:::::13:3:42:::	CD8
172	TGTGTGGTCGGAGATGACAAGATCATCTTT	TRAV12-1	0	TRAJ30	TRAV12	TRAJ30	CVVGDDKIIF	TGTGTGGTCGGAGATGACAAGATCATCTTT	:::::::::0:-5:8:::::10:-6:30:::	CD8
173	TGTGCAGAGACCCACTCTGGGGCTGGGAGTTACCAACTCACTTTC	TRAV5	0	TRAJ28	TRAV5	TRAJ28	CAETHSGAGSYQLTF	TGTGCAGAGACCCACTCTGGGGCTGGGAGTTACCAACTCACTTTC	:::::::::0:-3:10:::::13:-3:45:::	CD8
174	TGTGCCGTGACAGGGGGAAAGCTGATTTTT	TRAV12-2	0	TRAJ4	TRAV12	TRAJ4	CAVTGGKLIF	TGTGCCGTGACAGGGGGAAAGCTGATTTTT	:::::::::0:-3:10:::::18:-20:30:::	CD8
175	TGTGCCGTGGTAGATGACAAGATCATCTTT	TRAV12-2	0	TRAJ30	TRAV12	TRAJ30	CAVVDDKIIF	TGTGCCGTGGTAGATGACAAGATCATCTTT	:::::::::0:-4:9:::::11:-7:30:::	CD8
176	TGTGCTGAGGAGGGGGCCGAGGTTTCTGGTGGCTACAATAAGCTGATTTTT	TRAV21	0	TRAJ4	TRAV21	TRAJ4	CAEEGAEVSGGYNKLIF	TGTGCTGAGGAGGGGGCCGAGGTTTCTGGTGGCTACAATAAGCTGATTTTT	:::::::::0:-5:7:::::22:-3:51:::	CD8
177	TGTGCAGGAGCGGGTCTTGGCAATGACATGCGCTTT	TRAV27	0	TRAJ43	TRAV27	TRAJ43	CAGAGLGNDMRF	TGTGCAGGAGCGGGTCTTGGCAATGACATGCGCTTT	:::::::::0:0:10:::::20:-7:36:::	CD8
178	TGTGTGGTGAGTCACGCCAGACTCATGTTT	TRAV12-1	0	TRAJ31	TRAV12	TRAJ31	CVVSHARLMF	TGTGTGGTGAGTCACGCCAGACTCATGTTT	:::::::::0:-3:10:::::15:-11:30:::	CD8
179	TGTGCCGTGAACGGGGAAACTGACAGCTGGGGGAAATTGCAGTTT	TRAV12-2	0	TRAJ24	TRAV12	TRAJ24	CAVNGETDSWGKLQF	TGTGCCGTGAACGGGGAAACTGACAGCTGGGGGAAATTGCAGTTT	:::::::::0:-1:12:::::17:-4:45:::	CD8
180	TGTGTGGTGAACGATGACAAGATCATCTTT	TRAV12-1	0	TRAJ30	TRAV12	TRAJ30	CVVNDDKIIF	TGTGTGGTGAACGATGACAAGATCATCTTT	:::::::::0:-1:12:::::12:-8:30:::	CD8
181	TGTGCAGCAGATAATGCTGGCAACAACCGTAAGCTGATTTGG	TRAV13-1	0	TRAJ38	TRAV13	TRAJ38	CAADNAGNNRKLIW	TGTGCAGCAGATAATGCTGGCAACAACCGTAAGCTGATTTGG	:::::::::0:-4:9:::::4:8:42:::	CD4
182	TGTGCTGTGATAACTCAGGGCGGATCTGAAAAGCTGGTCTTT	TRAV21	0	TRAJ57	TRAV21	TRAJ57	CAVITQGGSEKLVF	TGTGCTGTGATAACTCAGGGCGGATCTGAAAAGCTGGTCTTT	:::::::::0:-2:10:::::6:4:42:::	CD8
183	TGTGTTGTGAGTAATAATGCAGGCAACATGCTCACCTTT	TRAV8-2	0	TRAJ39	TRAV8	TRAJ39	CVVSNNAGNMLTF	TGTGTTGTGAGTAATAATGCAGGCAACATGCTCACCTTT	:::::::::0:-2:12:::::7:0:39:::	CD8
184	TGTGCCGTGAACGATGACAAGATCATCTTT	TRAV12-2	0	TRAJ30	TRAV12	TRAJ30	CAVNDDKIIF	TGTGCCGTGAACGATGACAAGATCATCTTT	:::::::::0:-1:12:::::12:-8:30:::	CD8
185	TGTGCAGCAGGGGCTCAGGGCGGATCTGAAAAGCTGGTCTTT	TRAV29DV5	0	TRAJ57	TRAV29	TRAJ57	CAAGAQGGSEKLVF	TGTGCAGCAGGGGCTCAGGGCGGATCTGAAAAGCTGGTCTTT	:::::::::0:-4:9:::::13:-3:42:::	CD4
186	TGTGTGGTGAGCAGAACTGGGGCAAACAACCTCTTCTTT	TRAV10	0	TRAJ36	TRAV10	TRAJ36	CVVSRTGANNLFF	TGTGTGGTGAGCAGAACTGGGGCAAACAACCTCTTCTTT	:::::::::0:-1:12:::::7:3:39:::	CD4
187	TGTGCCTTTGAAGCCAACCAGGCAGGAACTGCTCTGATCTTT	TRAV24	0	TRAJ15	TRAV24	TRAJ15	CAFEANQAGTALIF	TGTGCCTTTGAAGCCAACCAGGCAGGAACTGCTCTGATCTTT	:::::::::0:-1:9:::::12:1:42:::	CD8
188	TGTGCTACGGACAGGGAAATGGATAGCAGCTATAAATTGATCTTC	TRAV17	0	TRAJ12	TRAV17	TRAJ12	CATDREMDSSYKLIF	TGTGCTACGGACAGGGAAATGGATAGCAGCTATAAATTGATCTTC	:::::::::0:-1:12:::::18:-2:45:::	CD8
189	TGTGCTGGGCGATATGGTGGTGCTACAAACAAGCTCATCTTT	TRAV35	0	TRAJ32	TRAV35	TRAJ32	CAGRYGGATNKLIF	TGTGCTGGGCGATATGGTGGTGCTACAAACAAGCTCATCTTT	:::::::::0:-2:10:::::12:-5:42:::	CD8
190	TGTGCTACGGACGCGAGGGGAAATGAGAAATTAACCTTT	TRAV17	0	TRAJ48	TRAV17	TRAJ48	CATDARGNEKLTF	TGTGCTACGGACGCGAGGGGAAATGAGAAATTAACCTTT	:::::::::0:0:13:::::18:-11:39:::	CD8
191	TGTGCAGCAAGAAACACCGCCAGACTCATGTTT	TRAV23DV6	0	TRAJ31	TRAV23	TRAJ31	CAARNTARLMF	TGTGCAGCAAGAAACACCGCCAGACTCATGTTT	:::::::::0:-2:11:::::12:-5:33:::	CD8
192	TGTGCTCCCCCGGAACGGTCTGCAAGGCAACTGACCTTT	TRAV22	0	TRAJ22	TRAV22	TRAJ22	CAPPERSARQLTF	TGTGCTCCCCCGGAACGGTCTGCAAGGCAACTGACCTTT	:::::::::0:-7:6:::::18:-11:39:::	CD8
193	TGTGCAGCAAGCGCGATTACTGGAGGCTTCAAAACTATCTTT	TRAV29DV5	0	TRAJ9	TRAV29	TRAJ9	CAASAITGGFKTIF	TGTGCAGCAAGCGCGATTACTGGAGGCTTCAAAACTATCTTT	:::::::::0:0:13:::::17:-5:42:::	CD4
194	TGTGCCGTGGAAGGTGACAAGATCATCTTT	TRAV12-2	0	TRAJ30	TRAV12	TRAJ30	CAVEGDKIIF	TGTGCCGTGGAAGGTGACAAGATCATCTTT	:::::::::0:-4:9:::::11:-7:30:::	CD8
195	TGTGCTTTCTTGGCTCAGGGCGGATCTGAAAAGCTGGTCTTT	TRAV38-1	0	TRAJ57	TRAV38	TRAJ57	CAFLAQGGSEKLVF	TGTGCTTTCTTGGCTCAGGGCGGATCTGAAAAGCTGGTCTTT	:::::::::0:-5:12:::::13:-3:42:::	CD8
196	TGTGCTACGGACGAAGTGACGAACACCGGTAACCAGTTCTATTTT	TRAV17	0	TRAJ49	TRAV17	TRAJ49	CATDEVTNTGNQFYF	TGTGCTACGGACGAAGTGACGAACACCGGTAACCAGTTCTATTTT	:::::::::0:0:13:::::19:1:45:::	CD8
197	TGTGCAGCAAGCTTGGCCGGTAACCAGTTCTATTTT	TRAV29DV5	0	TRAJ49	TRAV29	TRAJ49	CAASLAGNQFYF	TGTGCAGCAAGCTTGGCCGGTAACCAGTTCTATTTT	:::::::::0:-1:12:::::16:-5:36:::	CD8
198	TGTGCAGGAGATACGGCTTGGACAGGCAAACTAATCTTT	TRAV27	0	TRAJ37	TRAV27	TRAJ37	CAGDTAWTGKLIF	TGTGCAGGAGATACGGCTTGGACAGGCAAACTAATCTTT	:::::::::0:0:10:::::21:-13:39:::	CD8
199	TGCATCGTCAGAGTCGGGAACCAGGCAGGAACTGCTCTGATCTTT	TRAV26-1	0	TRAJ15	TRAV26	TRAJ15	CIVRVGNQAGTALIF	TGCATCGTCAGAGTCGGGAACCAGGCAGGAACTGCTCTGATCTTT	:::::::::0:0:16:::::18:-2:45:::	CD4
200	TGTGCAATGAGGAGGCTAACGGGGGGTTACCAGAAAGTTACCTTT	TRAV14DV4	0	TRAJ13	TRAV14	TRAJ13	CAMRRLTGGYQKVTF	TGTGCAATGAGGAGGCTAACGGGGGGTTACCAGAAAGTTACCTTT	:::::::::0:-1:15:::::21:-8:45:::	CD8
201	TGTGCCGCCGCAGGAGGAAAGCTTATCTTC	TRAV12-2	0	TRAJ23	TRAV12	TRAJ23	CAAAGGKLIF	TGTGCCGCCGCAGGAGGAAAGCTTATCTTC	:::::::::0:-6:7:::::12:-14:30:::	CD8
202	TGTGCTTTCATCGGGTCGGATGGCCAGAAGCTGCTCTTT	TRAV38-1	0	TRAJ16	TRAV38	TRAJ16	CAFIGSDGQKLLF	TGTGCTTTCATCGGGTCGGATGGCCAGAAGCTGCTCTTT	:::::::::0:-6:11:::::15:-5:39:::	CD8
203	TGTGCTTTGCAGATCAAAGCTGCAGGCAACAAGCTAACTTTT	TRAV38-1	0	TRAJ17	TRAV38	TRAJ17	CALQIKAAGNKLTF	TGTGCTTTGCAGATCAAAGCTGCAGGCAACAAGCTAACTTTT	:::::::::0:-9:8:::::3:10:42:::	CD8
204	TGTGCCGTGTGTGGTAACCAGTTCTATTTT	TRAV12-2	0	TRAJ49	TRAV12	TRAJ49	CAVCGNQFYF	TGTGCCGTGTGTGGTAACCAGTTCTATTTT	:::::::::0:-4:9:::::12:-7:30:::	CD8
205	TGTGCCGTTAGGGATGCCAGACTCATGTTT	TRAV12-2	0	TRAJ31	TRAV12	TRAJ31	CAVRDARLMF	TGTGCCGTTAGGGATGCCAGACTCATGTTT	:::::::::0:-5:8:::::13:-9:30:::	CD8
206	TGTGCTTTCATTACGCTTACCGGTAACCAGTTCTATTTT	TRAV38-1	0	TRAJ49	TRAV38	TRAJ49	CAFITLTGNQFYF	TGTGCTTTCATTACGCTTACCGGTAACCAGTTCTATTTT	:::::::::0:-6:11:::::18:-4:39:::	CD4
207	TGTGCAGGAGCTTATCCCGAAGGAAACAAACTGGTCTTT	TRAV27	0	TRAJ47	TRAV27	TRAJ47	CAGAYPEGNKLVF	TGTGCAGGAGCTTATCCCGAAGGAAACAAACTGGTCTTT	:::::::::0:0:10:::::21:-8:39:::	CD8
208	TGTGCCTCCCTCTGGAGAAATGCAGGCAACATGCTCACCTTT	TRAV38-2DV8	0	TRAJ39	TRAV38	TRAJ39	CASLWRNAGNMLTF	TGTGCCTCCCTCTGGAGAAATGCAGGCAACATGCTCACCTTT	:::::::::0:-11:5:::::18:-8:42:::	CD8
209	TGTGCCGTGAACCACTATCAGTTAATCTGG	TRAV12-2	0	TRAJ33	TRAV12	TRAJ33	CAVNHYQLIW	TGTGCCGTGAACCACTATCAGTTAATCTGG	:::::::::0:-1:12:::::13:-9:30:::	CD8
210	TGTGCCGTGGTTGCTTCCAAGATAATCTTT	TRAV12-2	0	TRAJ3	TRAV12	TRAJ3	CAVVASKIIF	TGTGCCGTGGTTGCTTCCAAGATAATCTTT	:::::::::0:-4:9:::::11:-12:30:::	CD8
211	TGTGCAGCAAGCGTTACCAATGCAGGCAAATCAACCTTT	TRAV29DV5	0	TRAJ27	TRAV29	TRAJ27	CAASVTNAGKSTF	TGTGCAGCAAGCGTTACCAATGCAGGCAAATCAACCTTT	:::::::::0:0:13:::::15:-4:39:::	CD8
212	TGTGCCGTCGGGGATGACAAGATCATCTTT	TRAV12-2	0	TRAJ30	TRAV12	TRAJ30	CAVGDDKIIF	TGTGCCGTCGGGGATGACAAGATCATCTTT	:::::::::0:-5:8:::::12:-8:30:::	CD8
213	TGTGCTCTGAGTGGGGGAAATACTGGAGGCTTCAAAACTATCTTT	TRAV19	0	TRAJ9	TRAV19	TRAJ9	CALSGGNTGGFKTIF	TGTGCTCTGAGTGGGGGAAATACTGGAGGCTTCAAAACTATCTTT	:::::::::0:-1:16:::::15:0:45:::	CD8
214	TGTGCAGAGACCAGCAGGGGCTTTGGGAATGTGCTGCATTGC	TRAV13-2	0	TRAJ35	TRAV13	TRAJ35	CAETSRGFGNVLHC	TGTGCAGAGACCAGCAGGGGCTTTGGGAATGTGCTGCATTGC	:::::::::0:-3:10:::::18:-4:42:::	CD8
215	TGCATCCTGAGAGACCAAGGATACAGAGATGACAAGATCATCTTT	TRAV26-2	0	TRAJ30	TRAV26	TRAJ30	CILRDQGYRDDKIIF	TGCATCCTGAGAGACCAAGGATACAGAGATGACAAGATCATCTTT	:::::::::0:0:15:::::22:-3:45:::	CD8
216	TGTGTGGTGACCTCCGACAAGCTCATCTTT	TRAV12-1	0	TRAJ34	TRAV12	TRAJ34	CVVTSDKLIF	TGTGTGGTGACCTCCGACAAGCTCATCTTT	:::::::::0:-3:10:::::13:-10:30:::	CD8
217	TGTGCTACGGTCGAGGCAACCTTGATGAATTCAGGATACAGCACCCTCACCTTT	TRAV17	0	TRAJ11	TRAV17	TRAJ11	CATVEATLMNSGYSTLTF	TGTGCTACGGTCGAGGCAACCTTGATGAATTCAGGATACAGCACCCTCACCTTT	:::::::::0:0:13:::::21:4:54:::	CD8
218	TGTGCAGCGGTCCCGTCGATGAACACAGGCTTTCAGAAACTTGTATTT	TRAV23DV6	0	TRAJ8	TRAV23	TRAJ8	CAAVPSMNTGFQKLVF	TGTGCAGCGGTCCCGTCGATGAACACAGGCTTTCAGAAACTTGTATTT	:::::::::0:-5:8:::::18:1:48:::	CD8
219	TGTGCAGGAGTACCCGACACCGGTAACCAGTTCTATTTT	TRAV27	0	TRAJ49	TRAV27	TRAJ49	CAGVPDTGNQFYF	TGTGCAGGAGTACCCGACACCGGTAACCAGTTCTATTTT	:::::::::0:0:10:::::16:-2:39:::	CD8
220	TGTGCAGAGATTCTAGCTAACAATGACATGCGCTTT	TRAV13-2	0	TRAJ43	TRAV13	TRAJ43	CAEILANNDMRF	TGTGCAGAGATTCTAGCTAACAATGACATGCGCTTT	:::::::::0:-3:10:::::17:-4:36:::	CD8
221	TGTGCTGTGTACGGCGACAACTTCAACAAATTTTACTTT	TRAV21	0	TRAJ21	TRAV21	TRAJ21	CAVYGDNFNKFYF	TGTGCTGTGTACGGCGACAACTTCAACAAATTTTACTTT	:::::::::0:-3:9:::::16:-1:39:::	CD8
222	TGTGCCGATACCTCAGGAACCTACAAATACATCTTT	TRAV3	0	TRAJ40	TRAV3	TRAJ40	CADTSGTYKYIF	TGTGCCGATACCTCAGGAACCTACAAATACATCTTT	:::::::::0:-11:5:::::8:-2:36:::	CD8
223	TGTGCTCTTGGGGAACTCTCCCAGGCAGGAACTGCTCTGATCTTT	TRDV1	0	TRAJ15	TRDV1	TRAJ15	CALGELSQAGTALIF	TGTGCTCTTGGGGAACTCTCCCAGGCAGGAACTGCTCTGATCTTT	:::::::::0:0:17:::::20:-4:45:::	CD8
224	TGTGCTACGGACGCAACGCCCAACGACTACAAGCTCAGCTTT	TRAV17	0	TRAJ20	TRAV17	TRAJ20	CATDATPNDYKLSF	TGTGCTACGGACGCAACGCCCAACGACTACAAGCTCAGCTTT	:::::::::0:0:13:::::21:-5:42:::	CD8
225	TGTGCTTGTCCTAATAATGCAGGCAACATGCTCACCTTT	TRAV38-2DV8	0	TRAJ39	TRAV38	TRAJ39	CACPNNAGNMLTF	TGTGCTTGTCCTAATAATGCAGGCAACATGCTCACCTTT	:::::::::0:-9:7:::::11:-4:39:::	CD8
226	TGTGCTCTTGGGGAACTATCGAACGACAAGCTCATCTTT	TRDV1	0	TRAJ34	TRDV1	TRAJ34	CALGELSNDKLIF	TGTGCTCTTGGGGAACTATCGAACGACAAGCTCATCTTT	:::::::::0:0:17:::::23:-11:39:::	CD8
227	TGTGCCGTGTCCGGTAACCAGTTCTATTTT	TRAV12-2	0	TRAJ49	TRAV12	TRAJ49	CAVSGNQFYF	TGTGCCGTGTCCGGTAACCAGTTCTATTTT	:::::::::0:-4:9:::::10:-5:30:::	CD8
228	TGTGCCGTGCTAGATGACAAGATCATCTTT	TRAV12-2	0	TRAJ30	TRAV12	TRAJ30	CAVLDDKIIF	TGTGCCGTGCTAGATGACAAGATCATCTTT	:::::::::0:-4:9:::::11:-7:30:::	CD8
229	TGTGTGGTGGGGGATGACAAGATCATCTTT	TRAV12-1	0	TRAJ30	TRAV12	TRAJ30	CVVGDDKIIF	TGTGTGGTGGGGGATGACAAGATCATCTTT	:::::::::0:-4:9:::::12:-8:30:::	CD8
230	TGTGCCGGGGATAATGCAGGCAACATGCTCACCTTT	TRAV12-2	0	TRAJ39	TRAV12	TRAJ39	CAGDNAGNMLTF	TGTGCCGGGGATAATGCAGGCAACATGCTCACCTTT	:::::::::0:-6:7:::::10:-6:36:::	CD8
231	TGTGCAGAGACCCCTTCTGGGGCTGGGAGTTACCAACTCACTTTC	TRAV5	0	TRAJ28	TRAV5	TRAJ28	CAETPSGAGSYQLTF	TGTGCAGAGACCCCTTCTGGGGCTGGGAGTTACCAACTCACTTTC	:::::::::0:-3:10:::::15:-5:45:::	CD8
232	TGTGCTGTCACCCAAGGGGGATAGCAACTATCAGTTAATCTGG	TRAV21	0	TRAJ33	TRAV21	TRAJ33	CAVTQGG_SNYQLIW	TGTGCTGTCACCCAAGGGGGATAGCAACTATCAGTTAATCTGG	:::::::::0:-4:8:::::18:-1:43:::	CD8
233	TGTGCAGGAGCTTCGGTTAGCAACTATCAGTTAATCTGG	TRAV27	0	TRAJ33	TRAV27	TRAJ33	CAGASVSNYQLIW	TGTGCAGGAGCTTCGGTTAGCAACTATCAGTTAATCTGG	:::::::::0:0:10:::::14:-1:39:::	CD8
234	TGTGCCGTGGCGGATGAGAAATTAACCTTT	TRAV12-2	0	TRAJ48	TRAV12	TRAJ48	CAVADEKLTF	TGTGCCGTGGCGGATGAGAAATTAACCTTT	:::::::::0:-4:9:::::13:-15:30:::	CD8
235	TGTGCAGCAAGCGCGAGCCATGACATGCGCTTT	TRAV29DV5	0	TRAJ43	TRAV29	TRAJ43	CAASASHDMRF	TGTGCAGCAAGCGCGAGCCATGACATGCGCTTT	:::::::::0:0:13:::::19:-9:33:::	CD8
236	TGTGCAGGAGTATGGAACACCGGTAACCAGTTCTATTTT	TRAV27	0	TRAJ49	TRAV27	TRAJ49	CAGVWNTGNQFYF	TGTGCAGGAGTATGGAACACCGGTAACCAGTTCTATTTT	:::::::::0:0:10:::::14:0:39:::	CD8
237	TGTGCCGTAGCGGGAGGAAAGCTTATCTTC	TRAV12-2	0	TRAJ23	TRAV12	TRAJ23	CAVAGGKLIF	TGTGCCGTAGCGGGAGGAAAGCTTATCTTC	:::::::::0:-5:8:::::11:-13:30:::	CD8
238	TGTGCCGTGACCAATGCCAGACTCATGTTT	TRAV12-2	0	TRAJ31	TRAV12	TRAJ31	CAVTNARLMF	TGTGCCGTGACCAATGCCAGACTCATGTTT	:::::::::0:0:13:::::11:-7:30:::	CD8
239	TGCGGCACAGATCTATCTAACTTTGGAAATGAGAAATTAACCTTT	TRAV30	0	TRAJ48	TRAV30	TRAJ48	CGTDLSNFGNEKLTF	TGCGGCACAGATCTATCTAACTTTGGAAATGAGAAATTAACCTTT	:::::::::0:-2:11:::::8:5:45:::	CD8
240	TGTGCCGTGACCGACGACAAGCTCATCTTT	TRAV12-2	0	TRAJ34	TRAV12	TRAJ34	CAVTDDKLIF	TGTGCCGTGACCGACGACAAGCTCATCTTT	:::::::::0:-3:10:::::14:-11:30:::	CD8
241	TGTGCAGCAATCCAGTCAGGAGGAGGTGCTGACGGACTCACCTTT	TRAV29DV5	0	TRAJ45	TRAV29	TRAJ45	CAAIQSGGGADGLTF	TGTGCAGCAATCCAGTCAGGAGGAGGTGCTGACGGACTCACCTTT	:::::::::0:-3:10:::::15:-5:45:::	CD8
242	TGTGCTTATAGGGGTAATCAAGGTGGAGGTAGCAACTATAAACTGACATTT	TRAV38-2DV8	0	TRAJ53	TRAV38	TRAJ53	CAYRGNQGGGSNYKLTF	TGTGCTTATAGGGGTAATCAAGGTGGAGGTAGCAACTATAAACTGACATTT	:::::::::0:-4:12:::::22:-6:51:::	CD4
243	TGCATCCTGAGAGGTCCCCCGGCCACATCTAGCAACACAGGCAAACTAATCTTT	TRAV26-2	0	TRAJ37	TRAV26	TRAJ37	CILRGPPATSSNTGKLIF	TGCATCCTGAGAGGTCCCCCGGCCACATCTAGCAACACAGGCAAACTAATCTTT	:::::::::0:-2:13:::::27:-4:54:::	CD8
244	TGTGCTGTCATGGATACCGGCACTGCCAGTAAACTCACCTTT	TRAV41	0	TRAJ44	TRAV41	TRAJ44	CAVMDTGTASKLTF	TGTGCTGTCATGGATACCGGCACTGCCAGTAAACTCACCTTT	:::::::::0:-2:10:::::13:-3:42:::	CD8
245	TGTGCAGCAACCCCCCTCTCAGGAACCTACAAATACATCTTT	TRAV13-1	0	TRAJ40	TRAV13	TRAJ40	CAATPLSGTYKYIF	TGTGCAGCAACCCCCCTCTCAGGAACCTACAAATACATCTTT	:::::::::0:-3:10:::::17:-5:42:::	CD4
246	TGTGCAGGAGAAGGAACTGGGGCAAACAACCTCTTCTTT	TRAV27	0	TRAJ36	TRAV27	TRAJ36	CAGEGTGANNLFF	TGTGCAGGAGAAGGAACTGGGGCAAACAACCTCTTCTTT	:::::::::0:0:10:::::14:-3:39:::	CD8
247	TGTGCAGGGATTAACTATGGTCAGAATTTTGTCTTT	TRAV25	0	TRAJ26	TRAV25	TRAJ26	CAGINYGQNFVF	TGTGCAGGGATTAACTATGGTCAGAATTTTGTCTTT	:::::::::0:0:9:::::6:0:36:::	CD8
248	TGTGCTGGGATTTTGGATAGCAGCTATAAATTGATCTTC	TRAV8-6	0	TRAJ12	TRAV8	TRAJ12	CAGILDSSYKLIF	TGTGCTGGGATTTTGGATAGCAGCTATAAATTGATCTTC	:::::::::0:-4:10:::::13:-3:39:::	CD4
249	TGTGTGGTGGGGGATGCCAGACTCATGTTT	TRAV12-1	0	TRAJ31	TRAV12	TRAJ31	CVVGDARLMF	TGTGTGGTGGGGGATGCCAGACTCATGTTT	:::::::::0:-4:9:::::13:-9:30:::	CD8
250	TGTGCCGTTGACCTGAGGGGTTACCAGAAAGTTACCTTT	TRAV12-2	0	TRAJ13	TRAV12	TRAJ13	CAVDLRGYQKVTF	TGTGCCGTTGACCTGAGGGGTTACCAGAAAGTTACCTTT	:::::::::0:-5:8:::::12:-6:39:::	CD8
251	TGTGCTTATAGGAGCCCCAGCACCGGTAACCAGTTCTATTTT	TRAV38-2DV8	0	TRAJ49	TRAV38	TRAJ49	CAYRSPSTGNQFYF	TGTGCTTATAGGAGCCCCAGCACCGGTAACCAGTTCTATTTT	:::::::::0:-1:15:::::20:-3:42:::	CD8
252	TGTGCTGTGATCCCCGACACCGGTAACCAGTTCTATTTT	TRAV8-6	0	TRAJ49	TRAV8	TRAJ49	CAVIPDTGNQFYF	TGTGCTGTGATCCCCGACACCGGTAACCAGTTCTATTTT	:::::::::0:-4:10:::::16:-2:39:::	CD8
253	TGTGCCGTTCCCCTCGGGGGTTACCAGAAAGTTACCTTT	TRAV12-2	0	TRAJ13	TRAV12	TRAJ13	CAVPLGGYQKVTF	TGTGCCGTTCCCCTCGGGGGTTACCAGAAAGTTACCTTT	:::::::::0:-5:8:::::15:-8:39:::	CD8
254	TGCATCGTCAGAGTCAGGAAAGCTGCAGGCAACAAGCTAACTTTT	TRAV26-1	0	TRAJ17	TRAV26	TRAJ17	CIVRVRKAAGNKLTF	TGCATCGTCAGAGTCAGGAAAGCTGCAGGCAACAAGCTAACTTTT	:::::::::0:-1:15:::::18:-5:45:::	CD8
255	TGTGCCGTGAATACTGCTGGCCAGAAGCTGCTCTTT	TRAV12-2	0	TRAJ16	TRAV12	TRAJ16	CAVNTAGQKLLF	TGTGCCGTGAATACTGCTGGCCAGAAGCTGCTCTTT	:::::::::0:-2:11:::::17:-10:36:::	CD8
256	TGTGCTCTTGGGGATTCTACCTCAGGAACCTACAAATACATCTTT	TRDV1	0	TRAJ40	TRDV1	TRAJ40	CALGDSTSGTYKYIF	TGTGCTCTTGGGGATTCTACCTCAGGAACCTACAAATACATCTTT	:::::::::0:-3:14:::::16:-1:45:::	CD8
257	TGCATCCTGTGGGGGGCTTATAACACCGACAAGCTCATCTTT	TRAV26-2	0	TRAJ34	TRAV26	TRAJ34	CILWGAYNTDKLIF	TGCATCCTGTGGGGGGCTTATAACACCGACAAGCTCATCTTT	:::::::::0:-6:9:::::16:-1:42:::	CD8
258	TGTGCTACGGACGCGGAAGATGGTCAGAATTTTGTCTTT	TRAV17	0	TRAJ26	TRAV17	TRAJ26	CATDAEDGQNFVF	TGTGCTACGGACGCGGAAGATGGTCAGAATTTTGTCTTT	:::::::::0:0:13:::::19:-9:39:::	CD8
259	TGTGCTTTCATGAAGCATGAGGATAACAATGACATGCGCTTT	TRAV38-1	0	TRAJ43	TRAV38	TRAJ43	CAFMKHEDNNDMRF	TGTGCTTTCATGAAGCATGAGGATAACAATGACATGCGCTTT	:::::::::0:0:17:::::22:-3:42:::	CD8
260	TGCCTCGTGGGTGACCGGGGTGGCAACAACCGTAAGCTGATTTGG	TRAV4	0	TRAJ38	TRAV4	TRAJ38	CLVGDRGGNNRKLIW	TGCCTCGTGGGTGACCGGGGTGGCAACAACCGTAAGCTGATTTGG	:::::::::0:-1:15:::::20:-6:45:::	CD8
261	TGTGCAGCAACTGGTTCAGGAGGAGGTGCTGACGGACTCACCTTT	TRAV13-1	0	TRAJ45	TRAV13	TRAJ45	CAATGSGGGADGLTF	TGTGCAGCAACTGGTTCAGGAGGAGGTGCTGACGGACTCACCTTT	:::::::::0:-3:10:::::14:-4:45:::	CD4
262	TGTGCTTATAGGAGAGTTCTTAACCAGGCAGGAACTGCTCTGATCTTT	TRAV38-2DV8	0	TRAJ15	TRAV38	TRAJ15	CAYRRVLNQAGTALIF	TGTGCTTATAGGAGAGTTCTTAACCAGGCAGGAACTGCTCTGATCTTT	:::::::::0:-2:14:::::21:-2:48:::	CD4
263	TGTGCCGTAGCCGCTGCAGGCAACAAGCTAACTTTT	TRAV12-2	0	TRAJ17	TRAV12	TRAJ17	CAVAAAGNKLTF	TGTGCCGTAGCCGCTGCAGGCAACAAGCTAACTTTT	:::::::::0:-5:8:::::12:-8:36:::	CD8
264	TGTGCTGTCAGTCGAGGAGAGACCGGTAACCAGTTCTATTTT	TRAV41	0	TRAJ49	TRAV41	TRAJ49	CAVSRGETGNQFYF	TGTGCTGTCAGTCGAGGAGAGACCGGTAACCAGTTCTATTTT	:::::::::0:-1:11:::::21:-4:42:::	CD8
265	TGTGTGGTGAGCACCGACAAGCTCATCTTT	TRAV12-1	0	TRAJ34	TRAV12	TRAJ34	CVVSTDKLIF	TGTGTGGTGAGCACCGACAAGCTCATCTTT	:::::::::0:0:13:::::11:-8:30:::	CD8
266	TGTGCCACCGAAGATGACAAGATCATCTTT	TRAV12-2	0	TRAJ30	TRAV12	TRAJ30	CATEDDKIIF	TGTGCCACCGAAGATGACAAGATCATCTTT	:::::::::0:-7:6:::::11:-7:30:::	CD8
267	TGTGCTTTCATGGCAGTCACCGGTAACCAGTTCTATTTT	TRAV38-1	0	TRAJ49	TRAV38	TRAJ49	CAFMAVTGNQFYF	TGTGCTTTCATGGCAGTCACCGGTAACCAGTTCTATTTT	:::::::::0:-5:12:::::17:-3:39:::	CD4
268	TGTGCCGTGAACGGGGAAGCCGACAGCTGGGGGAAATTGCAGTTT	TRAV12-2	0	TRAJ24	TRAV12	TRAJ24	CAVNGEADSWGKLQF	TGTGCCGTGAACGGGGAAGCCGACAGCTGGGGGAAATTGCAGTTT	:::::::::0:-1:12:::::21:-8:45:::	CD8
269	TGTGCAGGGCCCCCACTTGAAAATGAGAAATTAACCTTT	TRAV27	0	TRAJ48	TRAV27	TRAJ48	CAGPPLENEKLTF	TGTGCAGGGCCCCCACTTGAAAATGAGAAATTAACCTTT	:::::::::0:-2:8:::::16:-9:39:::	CD8
270	TGTGCTTATAGGAGTCGCGACCTGAATTATGGAGGAAGCCAAGGAAATCTCATCTTT	TRAV38-2DV8	0	TRAJ42	TRAV38	TRAJ42	CAYRSRDLNYGGSQGNLIF	TGTGCTTATAGGAGTCGCGACCTGAATTATGGAGGAAGCCAAGGAAATCTCATCTTT	:::::::::0:-2:14:::::22:0:57:::	CD8
271	TGTGCAGCAAGTGGGGGGGGGGCTGGGAGTTACCAACTCACTTTC	TRAV13-1	0	TRAJ28	TRAV13	TRAJ28	CAASGGGAGSYQLTF	TGTGCAGCAAGTGGGGGGGGGGCTGGGAGTTACCAACTCACTTTC	:::::::::0:-1:12:::::18:-8:45:::	CD8
272	TGCCTCGTCCCTTCTGGTTCTGCAAGGCAACTGACCTTT	TRAV4	0	TRAJ22	TRAV4	TRAJ22	CLVPSGSARQLTF	TGCCTCGTCCCTTCTGGTTCTGCAAGGCAACTGACCTTT	:::::::::0:-8:8:::::10:-3:39:::	CD8
273	TGTGCAGGAGCTCGCGACACCGGTAACCAGTTCTATTTT	TRAV27	0	TRAJ49	TRAV27	TRAJ49	CAGARDTGNQFYF	TGTGCAGGAGCTCGCGACACCGGTAACCAGTTCTATTTT	:::::::::0:0:10:::::16:-2:39:::	CD8
274	TGCATCCTGAGAGATATAACTTACACCGACAAGCTCATCTTT	TRAV26-2	0	TRAJ34	TRAV26	TRAJ34	CILRDITYTDKLIF	TGCATCCTGAGAGATATAACTTACACCGACAAGCTCATCTTT	:::::::::0:-1:14:::::22:-7:42:::	CD8
275	TGTGCTGTATTAACGGCCAACCAGGCAGGAACTGCTCTGATCTTT	TRAV21	0	TRAJ15	TRAV21	TRAJ15	CAVLTANQAGTALIF	TGTGCTGTATTAACGGCCAACCAGGCAGGAACTGCTCTGATCTTT	:::::::::0:-4:8:::::14:2:45:::	CD8
276	TGTGCCGTGACGGGAGGAAAGCTTATCTTC	TRAV12-2	0	TRAJ23	TRAV12	TRAJ23	CAVTGGKLIF	TGTGCCGTGACGGGAGGAAAGCTTATCTTC	:::::::::0:-3:10:::::11:-13:30:::	CD8
277	TGTGCTGTGATGAGGAGTGGAGGTAGCAACTATAAACTGACATTT	TRAV8-6	0	TRAJ53	TRAV8	TRAJ53	CAVMRSGGSNYKLTF	TGTGCTGTGATGAGGAGTGGAGGTAGCAACTATAAACTGACATTT	:::::::::0:0:13:::::15:-5:45:::	CD4
278	TGTGCTGTGTGTACTAGCTATGGAAAGCTGACATTT	TRAV36DV7	0	TRAJ52	TRAV36	TRAJ52	CAVCTSYGKLTF	TGTGCTGTGTGTACTAGCTATGGAAAGCTGACATTT	:::::::::0:-4:9:::::2:-4:36:::	CD8
279	TGTGCTCTGCTTATCAAAGCTGCAGGCAACAAGCTAACTTTT	TRAV16	0	TRAJ17	TRAV16	TRAJ17	CALLIKAAGNKLTF	TGTGCTCTGCTTATCAAAGCTGCAGGCAACAAGCTAACTTTT	:::::::::0:-6:8:::::12:-2:42:::	CD8
280	TGTGCTTTCATCCCCCTCAGTGGCTCTAGGTTGACCTTT	TRAV38-1	0	TRAJ58	TRAV38	TRAJ58	CAFIPLSGSRLTF	TGTGCTTTCATCCCCCTCAGTGGCTCTAGGTTGACCTTT	:::::::::0:-6:11:::::17:-10:39:::	CD4
281	TGTGCAACCTAAGGCCAACCAGGCAGGAACTGCTCTGATCTTT	TRAV12-3	0	TRAJ15	TRAV12	TRAJ15	CAT*GQP_AGTALIF	TGTGCAACCTAAGGCCAACCAGGCAGGAACTGCTCTGATCTTT	:::::::::0:-6:7:::::12:2:43:::	CD8
282	TGTGCTCCCGCCTCCTCAACTGACAGCTGGGGGAAATTGCAGTTT	TRAV17	0	TRAJ24	TRAV17	TRAJ24	CAPASSTDSWGKLQF	TGTGCTCCCGCCTCCTCAACTGACAGCTGGGGGAAATTGCAGTTT	:::::::::0:-7:6:::::16:-3:45:::	CD8
283	TGTGCAGGAATCGGGATAAATGGCAATGACATGCGCTTT	TRAV27	0	TRAJ43	TRAV27	TRAJ43	CAGIGINGNDMRF	TGTGCAGGAATCGGGATAAATGGCAATGACATGCGCTTT	:::::::::0:-1:9:::::23:-7:39:::	CD8
284	TGTGCTGGCCGACCTTACAATGCCAGACTCATGTTT	TRAV35	0	TRAJ31	TRAV35	TRAJ31	CAGRPYNARLMF	TGTGCTGGCCGACCTTACAATGCCAGACTCATGTTT	:::::::::0:-4:8:::::16:-6:36:::	CD8
285	TGTGCCGTGATAGGAGGAAAGCTTATCTTC	TRAV12-2	0	TRAJ23	TRAV12	TRAJ23	CAVIGGKLIF	TGTGCCGTGATAGGAGGAAAGCTTATCTTC	:::::::::0:-3:10:::::12:-14:30:::	CD8
286	TGTGCAGCAAGCATGAGCAGAGATGACAAGATCATCTTT	TRAV23DV6	0	TRAJ30	TRAV23	TRAJ30	CAASMSRDDKIIF	TGTGCAGCAAGCATGAGCAGAGATGACAAGATCATCTTT	:::::::::0:0:13:::::11:2:39:::	CD8
287	TGTGCAGCAACTCACAGCACCCTCACCTTT	TRAV13-1	0	TRAJ11	TRAV13	TRAJ11	CAATHSTLTF	TGTGCAGCAACTCACAGCACCCTCACCTTT	:::::::::0:-3:10:::::13:-12:30:::	CD8
288	TGTGCTGTTTTGAACAGAGATGACAAGATCATCTTT	TRAV41	0	TRAJ30	TRAV41	TRAJ30	CAVLNRDDKIIF	TGTGCTGTTTTGAACAGAGATGACAAGATCATCTTT	:::::::::0:-4:8:::::4:7:36:::	CD8
289	TGTGCAGGTTACGGGAACTTCAACAAATTTTACTTT	TRAV27	0	TRAJ21	TRAV27	TRAJ21	CAGYGNFNKFYF	TGTGCAGGTTACGGGAACTTCAACAAATTTTACTTT	:::::::::0:-2:8:::::15:-3:36:::	CD8
290	TGTGCTGTGAGCCCTGTTTATGGTCAGAATTTTGTCTTT	TRAV3	0	TRAJ26	TRAV3	TRAJ26	CAVSPVYGQNFVF	TGTGCTGTGAGCCCTGTTTATGGTCAGAATTTTGTCTTT	:::::::::0:-5:11:::::18:-8:39:::	CD8
291	TGTGCAGCAAGCGACCGTTCTAACGACTACAAGCTCAGCTTT	TRAV23DV6	0	TRAJ20	TRAV23	TRAJ20	CAASDRSNDYKLSF	TGTGCAGCAAGCGACCGTTCTAACGACTACAAGCTCAGCTTT	:::::::::0:-1:12:::::12:4:42:::	CD8
292	TGTGCCGTGGCGGATGACAAGATCATCTTT	TRAV12-2	0	TRAJ30	TRAV12	TRAJ30	CAVADDKIIF	TGTGCCGTGGCGGATGACAAGATCATCTTT	:::::::::0:-4:9:::::12:-8:30:::	CD8
293	TGTGCAGAGAGTAAGGAGGAGTTTTCTGGTGGCTACAATAAGCTGATTTTT	TRAV5	0	TRAJ4	TRAV5	TRAJ4	CAESKEEFSGGYNKLIF	TGTGCAGAGAGTAAGGAGGAGTTTTCTGGTGGCTACAATAAGCTGATTTTT	:::::::::0:0:13:::::20:-1:51:::	CD8
294	TGTGCAGGCTCCTACAATAACAATGACATGCGCTTT	TRAV27	0	TRAJ43	TRAV27	TRAJ43	CAGSYNNNDMRF	TGTGCAGGCTCCTACAATAACAATGACATGCGCTTT	:::::::::0:-2:8:::::12:1:36:::	CD8
295	TGCATCGTCAGAGTCGCGAACCAGGCAGGAACTGCTCTGATCTTT	TRAV26-1	0	TRAJ15	TRAV26	TRAJ15	CIVRVANQAGTALIF	TGCATCGTCAGAGTCGCGAACCAGGCAGGAACTGCTCTGATCTTT	:::::::::0:0:16:::::15:1:45:::	CD4
296	TGTGCCGTGGCCACAGGCAAACTAATCTTT	TRAV12-2	0	TRAJ37	TRAV12	TRAJ37	CAVATGKLIF	TGTGCCGTGGCCACAGGCAAACTAATCTTT	:::::::::0:-4:9:::::11:-12:30:::	CD8
297	TGTGCCGTGAACGCAAACAAGCTCATCTTT	TRAV12-2	0	TRAJ32	TRAV12	TRAJ32	CAVNANKLIF	TGTGCCGTGAACGCAAACAAGCTCATCTTT	:::::::::0:-1:12:::::13:-18:30:::	CD8
298	TGTGCTACGGACGCGTCACATAACACCGACAAGCTCATCTTT	TRAV17	0	TRAJ34	TRAV17	TRAJ34	CATDASHNTDKLIF	TGTGCTACGGACGCGTCACATAACACCGACAAGCTCATCTTT	:::::::::0:0:13:::::19:-4:42:::	CD8
299	TGTGCTGTGAGACCCATCCGAGGAAGCCAAGGAAATCTCATCTTT	TRAV3	0	TRAJ42	TRAV3	TRAJ42	CAVRPIRGSQGNLIF	TGTGCTGTGAGACCCATCCGAGGAAGCCAAGGAAATCTCATCTTT	:::::::::0:-4:12:::::19:-9:45:::	CD8
300	TGCCTCGTGGGTGAGAAGTATGGAGGAACCTACAAATACATCTTT	TRAV4	0	TRAJ40	TRAV4	TRAJ40	CLVGEKYGGTYKYIF	TGCCTCGTGGGTGAGAAGTATGGAGGAACCTACAAATACATCTTT	:::::::::0:-2:14:::::23:-8:45:::	CD8
301	TGTGCTGTCATCCCCCACACCGGTAACCAGTTCTATTTT	TRAV41	0	TRAJ49	TRAV41	TRAJ49	CAVIPHTGNQFYF	TGTGCTGTCATCCCCCACACCGGTAACCAGTTCTATTTT	:::::::::0:-2:10:::::16:-2:39:::	CD8
302	TGTGCAGGAGGTGAGGAGATTTCAGATGGCCAGAAGCTGCTCTTT	TRAV27	0	TRAJ16	TRAV27	TRAJ16	CAGGEEISDGQKLLF	TGTGCAGGAGGTGAGGAGATTTCAGATGGCCAGAAGCTGCTCTTT	:::::::::0:0:10:::::19:-3:45:::	CD8
303	TGTGCCGCCTCAGATGACAAGATCATCTTT	TRAV12-2	0	TRAJ30	TRAV12	TRAJ30	CAASDDKIIF	TGTGCCGCCTCAGATGACAAGATCATCTTT	:::::::::0:-6:7:::::11:-7:30:::	CD8
304	TGTGCTGTGGTGCCGAGATCAAACTGGGGCAAACAACCTCTTCTTT	TRAV21	0	TRAJ36	TRAV21	TRAJ36	CAVVPRSN_GANNLFF	TGTGCTGTGGTGCCGAGATCAAACTGGGGCAAACAACCTCTTCTTT	:::::::::0:-3:9:::::16:2:46:::	CD8
305	TGTGCCGTGACCGGAACCTACAAATACATCTTT	TRAV12-2	0	TRAJ40	TRAV12	TRAJ40	CAVTGTYKYIF	TGTGCCGTGACCGGAACCTACAAATACATCTTT	:::::::::0:-3:10:::::12:-9:33:::	CD8
306	TGTGCCGGAGGCGGGGGAAGCCAAGGAAATCTCATCTTT	TRAV12-2	0	TRAJ42	TRAV12	TRAJ42	CAGGGGSQGNLIF	TGTGCCGGAGGCGGGGGAAGCCAAGGAAATCTCATCTTT	:::::::::0:-6:7:::::12:-8:39:::	CD8
307	TGTGCTGTGAGGCGAGTCGCTGCAGGCAACAAGCTAACTTTT	TRAV21	0	TRAJ17	TRAV21	TRAJ17	CAVRRVAAGNKLTF	TGTGCTGTGAGGCGAGTCGCTGCAGGCAACAAGCTAACTTTT	:::::::::0:0:12:::::18:-8:42:::	CD8
308	TGCCTCGTGGGCGAACCTTCTTATTCAGGAGGAGGTGCTGACGGACTCACCTTT	TRAV4	0	TRAJ45	TRAV4	TRAJ45	CLVGEPSYSGGGADGLTF	TGCCTCGTGGGCGAACCTTCTTATTCAGGAGGAGGTGCTGACGGACTCACCTTT	:::::::::0:-2:14:::::21:-2:54:::	CD8
309	TGTGCCGTGACTAATGACAGACTCATGTTT	TRAV12-2	0	TRAJ31	TRAV12	TRAJ31	CAVTNDRLMF	TGTGCCGTGACTAATGACAGACTCATGTTT	:::::::::0:-3:10:::::12:-8:30:::	CD8
310	TGTGCCGGTAACACCGACAAGCTCATCTTT	TRAV12-2	0	TRAJ34	TRAV12	TRAJ34	CAGNTDKLIF	TGTGCCGGTAACACCGACAAGCTCATCTTT	:::::::::0:0:13:::::8:-5:30:::	CD8
311	TGTGCTGTGGGTGCAACAGTGGGGGGAAGCCAAGGAAATCTCATCTTT	TRAV8-3	0	TRAJ42	TRAV8	TRAJ42	CAVGATVGGSQGNLIF	TGTGCTGTGGGTGCAACAGTGGGGGGAAGCCAAGGAAATCTCATCTTT	:::::::::0:0:14:::::21:-8:48:::	CD8
312	TGTGCCGTGACCGGAGATGACAAGATCATCTTT	TRAV12-2	0	TRAJ30	TRAV12	TRAJ30	CAVTGDDKIIF	TGTGCCGTGACCGGAGATGACAAGATCATCTTT	:::::::::0:-3:10:::::7:0:33:::	CD8
313	TGTGCACCTCCCCGGTACCAGGCAGGAACTGCTCTGATCTTT	TRAV27	0	TRAJ15	TRAV27	TRAJ15	CAPPRYQAGTALIF	TGTGCACCTCCCCGGTACCAGGCAGGAACTGCTCTGATCTTT	:::::::::0:-4:6:::::16:-3:42:::	CD4
314	TGTGCCGTGAACAACGACAAGCTCATCTTT	TRAV12-2	0	TRAJ34	TRAV12	TRAJ34	CAVNNDKLIF	TGTGCCGTGAACAACGACAAGCTCATCTTT	:::::::::0:0:13:::::9:-6:30:::	CD8
315	TGTGCCGTTATACAGCAGTGCTTCCAAGATAATCTTT	TRAV13-1	0	TRAJ3	TRAV13	TRAJ3	CAVIQQ_ASKIIF	TGTGCCGTTATACAGCAGTGCTTCCAAGATAATCTTT	:::::::::0:-8:5:::::10:-4:37:::	CD8
316	TGTGCAATGAGAGACCCAGGAGGAGGTGCTGACGGACTCACCTTT	TRAV14DV4	0	TRAJ45	TRAV14	TRAJ45	CAMRDPGGGADGLTF	TGTGCAATGAGAGACCCAGGAGGAGGTGCTGACGGACTCACCTTT	:::::::::0:-3:14:::::16:-6:45:::	CD8
317	TGTGCCGTGATAGATGACAAGATCATCTTT	TRAV12-2	0	TRAJ30	TRAV12	TRAJ30	CAVIDDKIIF	TGTGCCGTGATAGATGACAAGATCATCTTT	:::::::::0:-3:10:::::11:-7:30:::	CD8
318	TGTGCTGTGCCTGCTTCTGGTTCTGCAAGGCAACTGACCTTT	TRAV21	0	TRAJ22	TRAV21	TRAJ22	CAVPASGSARQLTF	TGTGCTGTGCCTGCTTCTGGTTCTGCAAGGCAACTGACCTTT	:::::::::0:-3:9:::::13:-3:42:::	CD4
319	TGTGCAGAGAATAACCTGGCCGACAAGCTCATCTTT	TRAV13-2	0	TRAJ34	TRAV13	TRAJ34	CAENNLADKLIF	TGTGCAGAGAATAACCTGGCCGACAAGCTCATCTTT	:::::::::0:0:13:::::19:-10:36:::	CD8
320	TGTGCAGCAAGCGAGGGTAACCAGGGAGGAAAGCTTATCTTC	TRAV29DV5	0	TRAJ23	TRAV29	TRAJ23	CAASEGNQGGKLIF	TGTGCAGCAAGCGAGGGTAACCAGGGAGGAAAGCTTATCTTC	:::::::::0:0:13:::::17:-7:42:::	CD8
321	TGTGCCGTTACGGGGGACAAGATCATCTTT	TRAV12-2	0	TRAJ30	TRAV12	TRAJ30	CAVTGDKIIF	TGTGCCGTTACGGGGGACAAGATCATCTTT	:::::::::0:-5:8:::::15:-11:30:::	CD8
322	TGTGCAGAGCCTAAGGGGAACACAGGCTTTCAGAAACTTGTATTT	TRAV5	0	TRAJ8	TRAV5	TRAJ8	CAEPKGNTGFQKLVF	TGTGCAGAGCCTAAGGGGAACACAGGCTTTCAGAAACTTGTATTT	:::::::::0:-4:9:::::17:-1:45:::	CD8
323	TGTGTGGTGGGAGATGACAAGATCATCTTT	TRAV12-1	0	TRAJ30	TRAV12	TRAJ30	CVVGDDKIIF	TGTGTGGTGGGAGATGACAAGATCATCTTT	:::::::::0:-4:9:::::10:-6:30:::	CD8
324	TGTGCCGTAGTGGGGGCCAGACTCATGTTT	TRAV12-2	0	TRAJ31	TRAV12	TRAJ31	CAVVGARLMF	TGTGCCGTAGTGGGGGCCAGACTCATGTTT	:::::::::0:-5:8:::::15:-11:30:::	CD8
325	TGTGCTCTGAGTGTCATGAGGGGAGCTGCAGGCAACAAGCTAACTTTT	TRAV19	0	TRAJ17	TRAV19	TRAJ17	CALSVMRGAAGNKLTF	TGTGCTCTGAGTGTCATGAGGGGAGCTGCAGGCAACAAGCTAACTTTT	:::::::::0:-4:13:::::23:-7:48:::	CD8
326	TGTGCCGTGGGCACCGACAAGCTCATCTTT	TRAV12-2	0	TRAJ34	TRAV12	TRAJ34	CAVGTDKLIF	TGTGCCGTGGGCACCGACAAGCTCATCTTT	:::::::::0:-4:9:::::11:-8:30:::	CD8
327	TGTGCTGTCGAGGATAACAATGCCAGACTCATGTTT	TRAV41	0	TRAJ31	TRAV41	TRAJ31	CAVEDNNARLMF	TGTGCTGTCGAGGATAACAATGCCAGACTCATGTTT	:::::::::0:-3:9:::::13:-3:36:::	CD8
328	TGTGCAGAGATTCCTCCGACCGGTAACCAGTTCTATTTT	TRAV13-2	0	TRAJ49	TRAV13	TRAJ49	CAEIPPTGNQFYF	TGTGCAGAGATTCCTCCGACCGGTAACCAGTTCTATTTT	:::::::::0:-3:10:::::18:-4:39:::	CD8
329	TGCCTCGTGGGTGAGAAAACCTCCTACGACAAGGTGATATTT	TRAV4	0	TRAJ50	TRAV4	TRAJ50	CLVGEKTSYDKVIF	TGCCTCGTGGGTGAGAAAACCTCCTACGACAAGGTGATATTT	:::::::::0:-2:14:::::14:-1:42:::	CD8
330	TGCGCTGTGAGAGATGAGACAGGAAACACACCTCTTGTCTTT	TRAV1-1	0	TRAJ29	TRAV1	TRAJ29	CAVRDETGNTPLVF	TGCGCTGTGAGAGATGAGACAGGAAACACACCTCTTGTCTTT	:::::::::0:0:14:::::19:-6:42:::	CD4
331	TGTGCCGGCGATACAGGCAAACTAATCTTT	TRAV12-2	0	TRAJ37	TRAV12	TRAJ37	CAGDTGKLIF	TGTGCCGGCGATACAGGCAAACTAATCTTT	:::::::::0:-6:7:::::6:-7:30:::	CD8
332	TGTGCAGGAGCGGGGGTTCGGAACAATGACATGCGCTTT	TRAV27	0	TRAJ43	TRAV27	TRAJ43	CAGAGVRNNDMRF	TGTGCAGGAGCGGGGGTTCGGAACAATGACATGCGCTTT	:::::::::0:0:10:::::21:-5:39:::	CD8
333	TGTGTGGTGACCCATGACAAGATCATCTTT	TRAV12-1	0	TRAJ30	TRAV12	TRAJ30	CVVTHDKIIF	TGTGTGGTGACCCATGACAAGATCATCTTT	:::::::::0:-3:10:::::13:-9:30:::	CD8
334	TGTGCTATGACAACTGACAGCTGGGGGAAATTGCAGTTT	TRAV17	0	TRAJ24	TRAV17	TRAJ24	CAMTTDSWGKLQF	TGTGCTATGACAACTGACAGCTGGGGGAAATTGCAGTTT	:::::::::0:-6:7:::::6:1:39:::	CD4
335	TGTGCCGTCAGTGGCTCTAGGTTGACCTTT	TRAV12-2	0	TRAJ58	TRAV12	TRAJ58	CAVSGSRLTF	TGTGCCGTCAGTGGCTCTAGGTTGACCTTT	:::::::::0:-5:8:::::8:-10:30:::	CD8
336	TGTGCAGCAAGTATACGGTACGAAGGAAGCCAAGGAAATCTCATCTTT	TRAV13-1	0	TRAJ42	TRAV13	TRAJ42	CAASIRYEGSQGNLIF	TGTGCAGCAAGTATACGGTACGAAGGAAGCCAAGGAAATCTCATCTTT	:::::::::0:0:13:::::23:-10:48:::	CD4
337	TGTGCTTATAAGCCCTATAGCAACTATCAGTTAATCTGG	TRAV38-2DV8	0	TRAJ33	TRAV38	TRAJ33	CAYKPYSNYQLIW	TGTGCTTATAAGCCCTATAGCAACTATCAGTTAATCTGG	:::::::::0:-6:10:::::16:-3:39:::	CD8
338	TGTGCTGTGAGGGGGACCGACAGAGGCTCAACCCTGGGGAGGCTATACTTT	TRAV3	0	TRAJ18	TRAV3	TRAJ18	CAVRGTDRGSTLGRLYF	TGTGCTGTGAGGGGGACCGACAGAGGCTCAACCCTGGGGAGGCTATACTTT	:::::::::0:-5:11:::::16:0:51:::	CD8
339	TGTGCCGTGGAAGATGACAAGATCATCTTT	TRAV12-2	0	TRAJ30	TRAV12	TRAJ30	CAVEDDKIIF	TGTGCCGTGGAAGATGACAAGATCATCTTT	:::::::::0:-4:9:::::11:-7:30:::	CD8
340	TGTGCCGTGGCGGGAGGAAAGCTTATCTTC	TRAV12-2	0	TRAJ23	TRAV12	TRAJ23	CAVAGGKLIF	TGTGCCGTGGCGGGAGGAAAGCTTATCTTC	:::::::::0:-4:9:::::11:-13:30:::	CD8
341	TGTGTGTCGGGGGATGACAAGATCATCTTT	TRAV12-1	0	TRAJ30	TRAV12	TRAJ30	CVSGDDKIIF	TGTGTGTCGGGGGATGACAAGATCATCTTT	:::::::::0:-7:6:::::12:-8:30:::	CD8
342	TGTGCTACGGGTTACAACACCGACAAGCTCATCTTT	TRAV17	0	TRAJ34	TRAV17	TRAJ34	CATGYNTDKLIF	TGTGCTACGGGTTACAACACCGACAAGCTCATCTTT	:::::::::0:-3:10:::::11:-2:36:::	CD4
343	TGTGCCGTGACAGGATACAGCACCCTCACCTTT	TRAV12-2	0	TRAJ11	TRAV12	TRAJ11	CAVTGYSTLTF	TGTGCCGTGACAGGATACAGCACCCTCACCTTT	:::::::::0:-3:10:::::10:-6:33:::	CD8
344	TGTGCAGGTTTATATACCGGCACTGCCAGTAAACTCACCTTT	TRAV27	0	TRAJ44	TRAV27	TRAJ44	CAGLYTGTASKLTF	TGTGCAGGTTTATATACCGGCACTGCCAGTAAACTCACCTTT	:::::::::0:-2:8:::::10:0:42:::	CD8
345	TGTGCAGCAAGGGCAAATAACACCGACAAGCTCATCTTT	TRAV29DV5	0	TRAJ34	TRAV29	TRAJ34	CAARANNTDKLIF	TGTGCAGCAAGGGCAAATAACACCGACAAGCTCATCTTT	:::::::::0:-2:11:::::16:-4:39:::	CD8
346	TGTGCTTTTCACGGCTCAAAGCTCATCTTT	TRAV12-2	0	TRAJ34	TRAV12	TRAJ34	CAFHGSKLIF	TGTGCTTTTCACGGCTCAAAGCTCATCTTT	:::::::::0:-8:5:::::18:-15:30:::	CD8
347	TGTGCTCTGAGTGAGCCAAGTGCTCCCGGGGATAATGCAGGCAACATGCTCACCTTT	TRAV19	0	TRAJ39	TRAV19	TRAJ39	CALSEPSAPGDNAGNMLTF	TGTGCTCTGAGTGAGCCAAGTGCTCCCGGGGATAATGCAGGCAACATGCTCACCTTT	:::::::::0:-2:15:::::31:-6:57:::	CD8
348	TGTGCTACGGACGCTAGGAGGGCTGGGAGTTACCAACTCACTTTC	TRAV17	0	TRAJ28	TRAV17	TRAJ28	CATDARRAGSYQLTF	TGTGCTACGGACGCTAGGAGGGCTGGGAGTTACCAACTCACTTTC	:::::::::0:0:13:::::19:-9:45:::	CD4
349	TGTGCTACGGACCCGAAACCCACGGGAGGAGGAAACAAACTCACCTTT	TRAV17	0	TRAJ10	TRAV17	TRAJ10	CATDPKPTGGGNKLTF	TGTGCTACGGACCCGAAACCCACGGGAGGAGGAAACAAACTCACCTTT	:::::::::0:-1:12:::::17:-2:48:::	CD4
350	TGTGCAGAGAAAAGCGGCAACACAGGCAAACTAATCTTT	TRAV5	0	TRAJ37	TRAV5	TRAJ37	CAEKSGNTGKLIF	TGTGCAGAGAAAAGCGGCAACACAGGCAAACTAATCTTT	:::::::::0:-3:10:::::15:-7:39:::	CD4
351	TGTGCCGCGCGAGATGACAAGATCATCTTT	TRAV12-2	0	TRAJ30	TRAV12	TRAJ30	CAARDDKIIF	TGTGCCGCGCGAGATGACAAGATCATCTTT	:::::::::0:-6:7:::::10:-6:30:::	CD8
352	TGTGCAGGAGTTAGGGTTGAAAATGCAGGCAACATGCTCACCTTT	TRAV27	0	TRAJ39	TRAV27	TRAJ39	CAGVRVENAGNMLTF	TGTGCAGGAGTTAGGGTTGAAAATGCAGGCAACATGCTCACCTTT	:::::::::0:0:10:::::21:-8:45:::	CD8
353	TGTGCAGCAAGTTCTCTTGGGGCAAACAACCTCTTCTTT	TRAV29DV5	0	TRAJ36	TRAV29	TRAJ36	CAASSLGANNLFF	TGTGCAGCAAGTTCTCTTGGGGCAAACAACCTCTTCTTT	:::::::::0:-2:11:::::17:-6:39:::	CD8
354	TGTGCTGGGTATTTAATTCAGGGAGCCCAGAAGCTGGTATTT	TRAV35	0	TRAJ54	TRAV35	TRAJ54	CAGYLIQGAQKLVF	TGTGCTGGGTATTTAATTCAGGGAGCCCAGAAGCTGGTATTT	:::::::::0:-3:9:::::10:4:42:::	CD8
355	TGTGCTACGGACGCGTTACCTAACGACTACAAGCTCAGCTTT	TRAV17	0	TRAJ20	TRAV17	TRAJ20	CATDALPNDYKLSF	TGTGCTACGGACGCGTTACCTAACGACTACAAGCTCAGCTTT	:::::::::0:0:13:::::19:-3:42:::	CD8
356	TGTGCTACGGACGCTAAGGAGGGCTTCAAAACTATCTTT	TRAV17	0	TRAJ9	TRAV17	TRAJ9	CATDAKEGFKTIF	TGTGCTACGGACGCTAAGGAGGGCTTCAAAACTATCTTT	:::::::::0:0:13:::::17:-9:39:::	CD8
357	TGTGCAGCAAGGAGTACCGACAAGCTCATCTTT	TRAV29DV5	0	TRAJ34	TRAV29	TRAJ34	CAARSTDKLIF	TGTGCAGCAAGGAGTACCGACAAGCTCATCTTT	:::::::::0:-2:11:::::15:-9:33:::	CD8
358	TGTGCACCGAAGCGACCCGCCGGGGTGACAAGATCATCTTT	TRAV13-1	0	TRAJ30	TRAV13	TRAJ30	CAPKRPA_GDKIIF	TGTGCACCGAAGCGACCCGCCGGGGTGACAAGATCATCTTT	:::::::::0:-7:6:::::25:-10:41:::	CD8
359	TGTGCTACGGACGGTCAGGCCGGCACTGCCAGTAAACTCACCTTT	TRAV17	0	TRAJ44	TRAV17	TRAJ44	CATDGQAGTASKLTF	TGTGCTACGGACGGTCAGGCCGGCACTGCCAGTAAACTCACCTTT	:::::::::0:0:13:::::19:-6:45:::	CD8
360	TGTGCTGTCAGAGGCTTTCAGGGAGCCCAGAAGCTGGTATTT	TRAV41	0	TRAJ54	TRAV41	TRAJ54	CAVRGFQGAQKLVF	TGTGCTGTCAGAGGCTTTCAGGGAGCCCAGAAGCTGGTATTT	:::::::::0:0:12:::::16:-3:42:::	CD8
361	TGTGCAGAGAATTCAAATACTGGAGGCTTCAAAACTATCTTT	TRAV13-2	0	TRAJ9	TRAV13	TRAJ9	CAENSNTGGFKTIF	TGTGCAGAGAATTCAAATACTGGAGGCTTCAAAACTATCTTT	:::::::::0:-1:12:::::14:-2:42:::	CD8
362	TGTGTGGTGAACAGGGACAGCTATAAATTGATCTTC	TRAV12-1	0	TRAJ12	TRAV12	TRAJ12	CVVNRDSYKLIF	TGTGTGGTGAACAGGGACAGCTATAAATTGATCTTC	:::::::::0:0:13:::::17:-10:36:::	CD8
363	TGTGCCGTGAAAAGACCAAACGACTACAAGCTCAGCTTT	TRAV12-2	0	TRAJ20	TRAV12	TRAJ20	CAVKRPNDYKLSF	TGTGCCGTGAAAAGACCAAACGACTACAAGCTCAGCTTT	:::::::::0:-2:11:::::18:-5:39:::	CD8
364	TGTGCCGTGATGAATGCCAGACTCATGTTT	TRAV12-2	0	TRAJ31	TRAV12	TRAJ31	CAVMNARLMF	TGTGCCGTGATGAATGCCAGACTCATGTTT	:::::::::0:-3:10:::::12:-8:30:::	CD8
365	TGTGCAGGTCCTATGACAACTGACAGCTGGGGGAAATTGCAGTTT	TRAV27	0	TRAJ24	TRAV27	TRAJ24	CAGPMTTDSWGKLQF	TGTGCAGGTCCTATGACAACTGACAGCTGGGGGAAATTGCAGTTT	:::::::::0:-2:8:::::12:1:45:::	CD8
366	TGTGCAATGAGCCAGAAGCTGCTCTTT	TRAV12-3	0	TRAJ16	TRAV12	TRAJ16	CAMSQKLLF	TGTGCAATGAGCCAGAAGCTGCTCTTT	:::::::::0:-1:12:::::6:-9:27:::	CD8
367	TGTGCAGGGACCCCTTCTGGGGGTTACCAGAAAGTTACCTTT	TRAV27	0	TRAJ13	TRAV27	TRAJ13	CAGTPSGGYQKVTF	TGTGCAGGGACCCCTTCTGGGGGTTACCAGAAAGTTACCTTT	:::::::::0:-2:8:::::14:-4:42:::	CD8
368	TGTGCAGGAGGTCAAGTGAGGAACAATGACATGCGCTTT	TRAV27	0	TRAJ43	TRAV27	TRAJ43	CAGGQVRNNDMRF	TGTGCAGGAGGTCAAGTGAGGAACAATGACATGCGCTTT	:::::::::0:0:10:::::21:-5:39:::	CD8
369	TGTGCTCGGTACTCGTATGGTGGTGCTACAAACAAGCTCATCTTT	TRAV9-2	0	TRAJ32	TRAV9	TRAJ32	CARYSYGGATNKLIF	TGTGCTCGGTACTCGTATGGTGGTGCTACAAACAAGCTCATCTTT	:::::::::0:-7:7:::::15:-5:45:::	CD4
370	TGTGCTGTGAGAGACAGCGGGGGAGGAAGCTACATACCTACATTT	TRAV3	0	TRAJ6	TRAV3	TRAJ6	CAVRDSGGGSYIPTF	TGTGCTGTGAGAGACAGCGGGGGAGGAAGCTACATACCTACATTT	:::::::::0:0:16:::::21:-7:45:::	CD8
371	TGTGCCGCCAGAGATGACAAGATCATCTTT	TRAV12-2	0	TRAJ30	TRAV12	TRAJ30	CAARDDKIIF	TGTGCCGCCAGAGATGACAAGATCATCTTT	:::::::::0:-6:7:::::8:-4:30:::	CD8
372	TGTCTTCTCCTATATGGAAACAAACTGGTCTTT	TRAV40	0	TRAJ47	TRAV40	TRAJ47	CLLLYGNKLVF	TGTCTTCTCCTATATGGAAACAAACTGGTCTTT	:::::::::0:-6:8:::::11:-4:33:::	CD8
373	TGTGCTTATAGGAGCACCGGGACGGGCAAACTAATCTTT	TRAV38-2DV8	0	TRAJ37	TRAV38	TRAJ37	CAYRSTGTGKLIF	TGTGCTTATAGGAGCACCGGGACGGGCAAACTAATCTTT	:::::::::0:-1:15:::::21:-13:39:::	CD8
374	TGCGCTGTGATTTGGACACAGGCTTTCAGAAACTTGTATTT	TRAV1-1	0	TRAJ8	TRAV1	TRAJ8	CAVIWTQ_FQKLVF	TGCGCTGTGATTTGGACACAGGCTTTCAGAAACTTGTATTT	:::::::::0:-4:10:::::12:0:41:::	CD4
375	TGTGCCTTGGATACTGGAGGCTTCAAAACTATCTTT	TRAV12-2	0	TRAJ9	TRAV12	TRAJ9	CALDTGGFKTIF	TGTGCCTTGGATACTGGAGGCTTCAAAACTATCTTT	:::::::::0:-4:9:::::10:-4:36:::	CD4
376	TGTGTTCCAGGAGGAGGTGCTGACGGACTCACCTTT	TRAV21	0	TRAJ45	TRAV21	TRAJ45	CVPGGGADGLTF	TGTGTTCCAGGAGGAGGTGCTGACGGACTCACCTTT	:::::::::0:-8:4:::::0:0:36:::	CD8
377	TGTGCTCTGAGTGGTCCTGGGGCAAACAACCTCTTCTTT	TRAV19	0	TRAJ36	TRAV19	TRAJ36	CALSGPGANNLFF	TGTGCTCTGAGTGGTCCTGGGGCAAACAACCTCTTCTTT	:::::::::0:-4:13:::::16:-5:39:::	CD8
378	TGTGCCGTCGCCAATGCCAGACTCATGTTT	TRAV12-2	0	TRAJ31	TRAV12	TRAJ31	CAVANARLMF	TGTGCCGTCGCCAATGCCAGACTCATGTTT	:::::::::0:-5:8:::::11:-7:30:::	CD8
379	TGTGCAGCAAGTATAGGTTATGGTGGTGCTACAAACAAGCTCATCTTT	TRAV13-1	0	TRAJ32	TRAV13	TRAJ32	CAASIGYGGATNKLIF	TGTGCAGCAAGTATAGGTTATGGTGGTGCTACAAACAAGCTCATCTTT	:::::::::0:0:13:::::17:-4:48:::	CD8
380	TGTGCCGTTTCAGATGACAAGATCATCTTT	TRAV12-2	0	TRAJ30	TRAV12	TRAJ30	CAVSDDKIIF	TGTGCCGTTTCAGATGACAAGATCATCTTT	:::::::::0:-5:8:::::11:-7:30:::	CD8
381	TGTGCCGCGGAAGATGACAAGATCATCTTT	TRAV12-2	0	TRAJ30	TRAV12	TRAJ30	CAAEDDKIIF	TGTGCCGCGGAAGATGACAAGATCATCTTT	:::::::::0:-6:7:::::11:-7:30:::	CD8
382	TGTGCTGTGAGTAAACCATCAGGAGGAAGCTACATACCTACATTT	TRAV8-6	0	TRAJ6	TRAV8	TRAJ6	CAVSKPSGGSYIPTF	TGTGCTGTGAGTAAACCATCAGGAGGAAGCTACATACCTACATTT	:::::::::0:-2:12:::::16:-2:45:::	CD4
383	TGTGCAGGACCCATGGATAGCAACTATCAGTTAATCTGG	TRAV27	0	TRAJ33	TRAV27	TRAJ33	CAGPMDSNYQLIW	TGTGCAGGACCCATGGATAGCAACTATCAGTTAATCTGG	:::::::::0:-1:9:::::10:3:39:::	CD4
384	TGTGCTTATAGGACGCGTATGGACCAGTTCTATTTT	TRAV38-2DV8	0	TRAJ49	TRAV38	TRAJ49	CAYRTRMDQFYF	TGTGCTTATAGGACGCGTATGGACCAGTTCTATTTT	:::::::::0:0:17:::::22:-11:36:::	CD4
385	TGTGCAGCAAGTACAGGGGATCAAACTGGGGCAAACAACCTCTTCTTT	TRAV13-1	0	TRAJ36	TRAV13	TRAJ36	CAASTGDQTGANNLFF	TGTGCAGCAAGTACAGGGGATCAAACTGGGGCAAACAACCTCTTCTTT	:::::::::0:0:13:::::18:2:48:::	CD8
386	TGTGCAATGAGAGAGTTTTTCTCAGGAACCTACAAATACATCTTT	TRAV14DV4	0	TRAJ40	TRAV14	TRAJ40	CAMREFFSGTYKYIF	TGTGCAATGAGAGAGTTTTTCTCAGGAACCTACAAATACATCTTT	:::::::::0:-2:15:::::20:-5:45:::	CD8
387	TGTGTTCGCACGGGAAGGCACAACTTCAACAAATTTTACTTT	TRAV9-2	0	TRAJ21	TRAV9	TRAJ21	CVRTGRHNFNKFYF	TGTGTTCGCACGGGAAGGCACAACTTCAACAAATTTTACTTT	:::::::::0:-7:7:::::19:-1:42:::	CD8
388	TGTGCTCTAAGTGTCAGAGATGACAAGATCATCTTT	TRAV16	0	TRAJ30	TRAV16	TRAJ30	CALSVRDDKIIF	TGTGCTCTAAGTGTCAGAGATGACAAGATCATCTTT	:::::::::0:-1:13:::::14:-4:36:::	CD8
389	TGTGTTGTGAATAATAATGCAGGCAACATGCTCACCTTT	TRAV8-2	0	TRAJ39	TRAV8	TRAJ39	CVVNNNAGNMLTF	TGTGTTGTGAATAATAATGCAGGCAACATGCTCACCTTT	:::::::::0:-4:10:::::7:0:39:::	CD8
390	TGTGCCGTCAGTGCTTCCAAGATAATCTTT	TRAV12-2	0	TRAJ3	TRAV12	TRAJ3	CAVSASKIIF	TGTGCCGTCAGTGCTTCCAAGATAATCTTT	:::::::::0:-5:8:::::8:-9:30:::	CD8
391	TGCATCCTGAGGGAAGATCGTTTTCAGGGAGCCCAGAAGCTGGTATTT	TRAV26-2	0	TRAJ54	TRAV26	TRAJ54	CILREDRFQGAQKLVF	TGCATCCTGAGGGAAGATCGTTTTCAGGGAGCCCAGAAGCTGGTATTT	:::::::::0:-1:14:::::22:-3:48:::	CD4
392	TGTGCCGTTTCGGACGACAAGCTCATCTTT	TRAV12-2	0	TRAJ34	TRAV12	TRAJ34	CAVSDDKLIF	TGTGCCGTTTCGGACGACAAGCTCATCTTT	:::::::::0:-5:8:::::14:-11:30:::	CD8
393	TGTGCCGTTCAGGATGAGAAATTAACCTTT	TRAV12-2	0	TRAJ48	TRAV12	TRAJ48	CAVQDEKLTF	TGTGCCGTTCAGGATGAGAAATTAACCTTT	:::::::::0:-5:8:::::13:-15:30:::	CD8
394	TGCCTCGTGGGTGAGCCTGATAGCAACTATCAGTTAATCTGG	TRAV4	0	TRAJ33	TRAV4	TRAJ33	CLVGEPDSNYQLIW	TGCCTCGTGGGTGAGCCTGATAGCAACTATCAGTTAATCTGG	:::::::::0:-2:14:::::18:-2:42:::	CD8
395	TGTGTGGTGAGCAGCTATAAATTGATCTTC	TRAV12-1	0	TRAJ12	TRAV12	TRAJ12	CVVSSYKLIF	TGTGTGGTGAGCAGCTATAAATTGATCTTC	:::::::::0:0:13:::::9:-8:30:::	CD8
396	TGTGCAATGAGCGGCCATGGGGCAAACAACCTCTTCTTT	TRAV14DV4	0	TRAJ36	TRAV14	TRAJ36	CAMSGHGANNLFF	TGTGCAATGAGCGGCCATGGGGCAAACAACCTCTTCTTT	:::::::::0:-6:11:::::17:-6:39:::	CD8
397	TGTGCTGTGAGTGGCCCCTCATACAATAACAATGACATGCGCTTT	TRAV8-4	0	TRAJ43	TRAV8	TRAJ43	CAVSGPSYNNNDMRF	TGTGCTGTGAGTGGCCCCTCATACAATAACAATGACATGCGCTTT	:::::::::0:-1:13:::::21:1:45:::	CD4
398	TGTGCAGCAAGTTCCACGGGAGGAGGAAACAAACTCACCTTT	TRAV13-1	0	TRAJ10	TRAV13	TRAJ10	CAASSTGGGNKLTF	TGTGCAGCAAGTTCCACGGGAGGAGGAAACAAACTCACCTTT	:::::::::0:-1:12:::::14:-5:42:::	CD8
399	TGTGCCGTGACCCCCACCGACAAGCTCATCTTT	TRAV12-2	0	TRAJ34	TRAV12	TRAJ34	CAVTPTDKLIF	TGTGCCGTGACCCCCACCGACAAGCTCATCTTT	:::::::::0:-3:10:::::14:-8:33:::	CD8
400	TGTGCAGGGGCTTATAACACCGACAAGCTCATCTTT	TRAV13-2	0	TRAJ34	TRAV13	TRAJ34	CAGAYNTDKLIF	TGTGCAGGGGCTTATAACACCGACAAGCTCATCTTT	:::::::::0:-6:7:::::10:-1:36:::	CD4
401	TGTGCCGTGACAGGAACCTACAAATACATCTTT	TRAV12-2	0	TRAJ40	TRAV12	TRAJ40	CAVTGTYKYIF	TGTGCCGTGACAGGAACCTACAAATACATCTTT	:::::::::0:-3:10:::::10:-7:33:::	CD8
402	TGTGGCACAGAGAGAAGAGGAATTATGGTGGTGCTACAAACAAGCTCATCTTT	TRAV30	0	TRAJ32	TRAV30	TRAJ32	CGTERRGIM_GATNKLIF	TGTGGCACAGAGAGAAGAGGAATTATGGTGGTGCTACAAACAAGCTCATCTTT	:::::::::0:0:13:::::19:-1:53:::	CD8
403	TGTGCAGGAGTTCCGAACACCGGTAACCAGTTCTATTTT	TRAV27	0	TRAJ49	TRAV27	TRAJ49	CAGVPNTGNQFYF	TGTGCAGGAGTTCCGAACACCGGTAACCAGTTCTATTTT	:::::::::0:0:10:::::6:7:39:::	CD8
404	TGTGCTCTGAGTGACCGGACGGGCAGGAGAGCACTTACTTTT	TRAV9-2	0	TRAJ5	TRAV9	TRAJ5	CALSDRTGRRALTF	TGTGCTCTGAGTGACCGGACGGGCAGGAGAGCACTTACTTTT	:::::::::0:0:14:::::18:-5:42:::	CD4
405	TGTGCTCTGGGGGGGATGAGGAGTTACCAGAAAGTTACCTTT	TRAV19	0	TRAJ13	TRAV19	TRAJ13	CALGGMRSYQKVTF	TGTGCTCTGGGGGGGATGAGGAGTTACCAGAAAGTTACCTTT	:::::::::0:-8:9:::::19:-9:42:::	CD8
406	TGTGCTTATAGGAGCAGTAGGCTGAGGGGTACTAGCTATGGAAAGCTGACATTT	TRAV38-2DV8	0	TRAJ52	TRAV38	TRAJ52	CAYRSSRLRGTSYGKLTF	TGTGCTTATAGGAGCAGTAGGCTGAGGGGTACTAGCTATGGAAAGCTGACATTT	:::::::::0:-1:15:::::20:-5:54:::	CD8
407	TGTGCTGTGAGTGATCGGGGTGGTGGTACTAGCTATGGAAAGCTGACATTT	TRAV8-6	0	TRAJ52	TRAV8	TRAJ52	CAVSDRGGGTSYGKLTF	TGTGCTGTGAGTGATCGGGGTGGTGGTACTAGCTATGGAAAGCTGACATTT	:::::::::0:0:14:::::20:-7:51:::	CD8
408	TGTGCAGAGAGCGAAGGAGGTGCTGACGGACTCACCTTT	TRAV5	0	TRAJ45	TRAV5	TRAJ45	CAESEGGADGLTF	TGTGCAGAGAGCGAAGGAGGTGCTGACGGACTCACCTTT	:::::::::0:-2:11:::::14:-10:39:::	CD8
409	TGTGCTGGGTCCGATAATGCAGGCAACATGCTCACCTTT	TRAV21	0	TRAJ39	TRAV21	TRAJ39	CAGSDNAGNMLTF	TGTGCTGGGTCCGATAATGCAGGCAACATGCTCACCTTT	:::::::::0:-5:7:::::13:-6:39:::	CD4
410	TGTGCTGCCGCGACCGGTAACCAGTTCTATTTT	TRAV41	0	TRAJ49	TRAV41	TRAJ49	CAAATGNQFYF	TGTGCTGCCGCGACCGGTAACCAGTTCTATTTT	:::::::::0:-5:7:::::12:-4:33:::	CD8
411	TGTGCCGTGAACAAAAACGACTACAAGCTCAGCTTT	TRAV12-2	0	TRAJ20	TRAV12	TRAJ20	CAVNKNDYKLSF	TGTGCCGTGAACAAAAACGACTACAAGCTCAGCTTT	:::::::::0:0:13:::::15:-5:36:::	CD8
412	TGTGCAGCAAGCCCCTCGGATGCCAGACTCATGTTT	TRAV29DV5	0	TRAJ31	TRAV29	TRAJ31	CAASPSDARLMF	TGTGCAGCAAGCCCCTCGGATGCCAGACTCATGTTT	:::::::::0:-1:12:::::19:-9:36:::	CD8
413	TGCATCGTCAGAGTCGGCAACCAGGCAGGAACTGCTCTGATCTTT	TRAV26-1	0	TRAJ15	TRAV26	TRAJ15	CIVRVGNQAGTALIF	TGCATCGTCAGAGTCGGCAACCAGGCAGGAACTGCTCTGATCTTT	:::::::::0:0:16:::::17:-1:45:::	CD4
414	TGTGCTCTGAGTGGGTCCCCCGGATCTAACTTTGGAAATGAGAAATTAACCTTT	TRAV19	0	TRAJ48	TRAV19	TRAJ48	CALSGSPGSNFGNEKLTF	TGTGCTCTGAGTGGGTCCCCCGGATCTAACTTTGGAAATGAGAAATTAACCTTT	:::::::::0:-4:13:::::23:-1:54:::	CD8
415	TGCATCCCGTTATATACAACTTCAACAAATTTTACTTT	TRAV26-2	0	TRAJ21	TRAV26	TRAJ21	CIPLYT_FNKFYF	TGCATCCCGTTATATACAACTTCAACAAATTTTACTTT	:::::::::0:-8:7:::::8:6:38:::	CD8
416	TGTGCTCTGAGTGAGTGGGGTTCAGGATACAGCACCCTCACCTTT	TRAV19	0	TRAJ11	TRAV19	TRAJ11	CALSEWGSGYSTLTF	TGTGCTCTGAGTGAGTGGGGTTCAGGATACAGCACCCTCACCTTT	:::::::::0:-2:15:::::20:-4:45:::	CD4
417	TGCATCCGCTCAAATGCTGGTGGTACTAGCTATGGAAAGCTGACATTT	TRAV26-2	0	TRAJ52	TRAV26	TRAJ52	CIRSNAGGTSYGKLTF	TGCATCCGCTCAAATGCTGGTGGTACTAGCTATGGAAAGCTGACATTT	:::::::::0:-8:7:::::12:-2:48:::	CD8
418	TGCCTCGTGGGTGACTATGATAATGCAGGCAACATGCTCACCTTT	TRAV4	0	TRAJ39	TRAV4	TRAJ39	CLVGDYDNAGNMLTF	TGCCTCGTGGGTGACTATGATAATGCAGGCAACATGCTCACCTTT	:::::::::0:-1:15:::::16:-3:45:::	CD8
419	TGTGCTGTGGGTGCAAGAGATGACAAGATCATCTTT	TRAV8-3	0	TRAJ30	TRAV8	TRAJ30	CAVGARDDKIIF	TGTGCTGTGGGTGCAAGAGATGACAAGATCATCTTT	:::::::::0:0:14:::::15:-5:36:::	CD8
420	TGTGTGGTGAACAGAATTGGCTGGGGGAAATTGCAGTTT	TRAV12-1	0	TRAJ24	TRAV12	TRAJ24	CVVNRIGWGKLQF	TGTGTGGTGAACAGAATTGGCTGGGGGAAATTGCAGTTT	:::::::::0:0:13:::::19:-12:39:::	CD4
421	TGTGCCGTGACTGGGACCGACAAGCTCATCTTT	TRAV12-2	0	TRAJ34	TRAV12	TRAJ34	CAVTGTDKLIF	TGTGCCGTGACTGGGACCGACAAGCTCATCTTT	:::::::::0:-3:10:::::15:-9:33:::	CD8
422	TGTGTGGTGGGGGGAGGCTCAACCCTGGGGAGGCTATACTTT	TRAV12-1	0	TRAJ18	TRAV12	TRAJ18	CVVGGGSTLGRLYF	TGTGTGGTGGGGGGAGGCTCAACCCTGGGGAGGCTATACTTT	:::::::::0:-4:9:::::13:-6:42:::	CD8
423	TGTGCAATGATGGTGGACTGACAGCTGGGGGAAATTGCAGTTT	TRAV12-3	0	TRAJ24	TRAV12	TRAJ24	CAMMVD*_SWGKLQF	TGTGCAATGATGGTGGACTGACAGCTGGGGGAAATTGCAGTTT	:::::::::0:-3:10:::::16:-5:43:::	CD8
424	TGTGCTGTGAGGGTCCAGGGGGGCGGCACTGCCAGTAAACTCACCTTT	TRAV21	0	TRAJ44	TRAV21	TRAJ44	CAVRVQGGGTASKLTF	TGTGCTGTGAGGGTCCAGGGGGGCGGCACTGCCAGTAAACTCACCTTT	:::::::::0:0:12:::::23:-7:48:::	CD8
425	TGTGCAGCAACGCCACACTATGGTCAGAATTTTGTCTTT	TRAV29DV5	0	TRAJ26	TRAV29	TRAJ26	CAATPHYGQNFVF	TGTGCAGCAACGCCACACTATGGTCAGAATTTTGTCTTT	:::::::::0:-3:10:::::16:-6:39:::	CD8
426	TGTGTGGTCGATATTAACAATGACATGCGCTTT	TRAV12-1	0	TRAJ43	TRAV12	TRAJ43	CVVDINNDMRF	TGTGTGGTCGATATTAACAATGACATGCGCTTT	:::::::::0:-5:8:::::14:-4:33:::	CD8
427	TGTGCTGTCAGATCGGACACCGACAAGCTCATCTTT	TRAV41	0	TRAJ34	TRAV41	TRAJ34	CAVRSDTDKLIF	TGTGCTGTCAGATCGGACACCGACAAGCTCATCTTT	:::::::::0:0:12:::::16:-7:36:::	CD8
428	TGTGTGGTGAGCGCGGACAAATTTTACTTT	TRAV12-1	0	TRAJ21	TRAV12	TRAJ21	CVVSADKFYF	TGTGTGGTGAGCGCGGACAAATTTTACTTT	:::::::::0:-3:10:::::16:-10:30:::	CD8
429	TGTGCCGTGATGCATGACAAGATCATCTTT	TRAV12-2	0	TRAJ30	TRAV12	TRAJ30	CAVMHDKIIF	TGTGCCGTGATGCATGACAAGATCATCTTT	:::::::::0:-3:10:::::13:-9:30:::	CD8
430	TGTGGCACAGGGGGGAATTCAGGAAACACACCTCTTGTCTTT	TRAV30	0	TRAJ29	TRAV30	TRAJ29	CGTGGNSGNTPLVF	TGTGGCACAGGGGGGAATTCAGGAAACACACCTCTTGTCTTT	:::::::::0:-3:10:::::13:0:42:::	CD8
431	TGTGCAGCAAGTGGCGGTAATGCAGGCAACATGCTCACCTTT	TRAV13-1	0	TRAJ39	TRAV13	TRAJ39	CAASGGNAGNMLTF	TGTGCAGCAAGTGGCGGTAATGCAGGCAACATGCTCACCTTT	:::::::::0:-1:12:::::17:-7:42:::	CD4
432	TGTGCAAAGAATAGTGGAGGTAGCAACTATAAACTGACATTT	TRAV12-3	0	TRAJ53	TRAV12	TRAJ53	CAKNSGGSNYKLTF	TGTGCAAAGAATAGTGGAGGTAGCAACTATAAACTGACATTT	:::::::::0:-3:10:::::7:0:42:::	CD8
433	TGTGTGGTGAGCCCCACCGACAAGCTCATCTTT	TRAV12-1	0	TRAJ34	TRAV12	TRAJ34	CVVSPTDKLIF	TGTGTGGTGAGCCCCACCGACAAGCTCATCTTT	:::::::::0:-3:10:::::14:-8:33:::	CD8
434	TGTGCAGCAAGCGCGGTGTCAGGAACCTACAAATACATCTTT	TRAV29DV5	0	TRAJ40	TRAV29	TRAJ40	CAASAVSGTYKYIF	TGTGCAGCAAGCGCGGTGTCAGGAACCTACAAATACATCTTT	:::::::::0:0:13:::::18:-6:42:::	CD4
435	TGTGTTGTGACCTCGCGAGGAACCTCCTACGACAAGGTGATATTT	TRAV8-2	0	TRAJ50	TRAV8	TRAJ50	CVVTSRGTSYDKVIF	TGTGTTGTGACCTCGCGAGGAACCTCCTACGACAAGGTGATATTT	:::::::::0:-4:10:::::20:-4:45:::	CD8
436	TGTGCTCTCCCTCGTTCTAACGACTACAAGCTCAGCTTT	TRAV16	0	TRAJ20	TRAV16	TRAJ20	CALPRSNDYKLSF	TGTGCTCTCCCTCGTTCTAACGACTACAAGCTCAGCTTT	:::::::::0:-6:8:::::12:1:39:::	CD8
437	TGTGCTCTGATCATAACTCAGGGCGGATCTGAAAAGCTGGTCTTT	TRAV9-2	0	TRAJ57	TRAV9	TRAJ57	CALIITQGGSEKLVF	TGTGCTCTGATCATAACTCAGGGCGGATCTGAAAAGCTGGTCTTT	:::::::::0:-4:10:::::3:11:45:::	CD8
438	TGTGCTGTGAGAGACATCGGGCCAGGAGGAAGCTACATACCTACATTT	TRAV3	0	TRAJ6	TRAV3	TRAJ6	CAVRDIGPGGSYIPTF	TGTGCTGTGAGAGACATCGGGCCAGGAGGAAGCTACATACCTACATTT	:::::::::0:0:16:::::22:-5:48:::	CD4
439	TGTGCCGTGGCACGGAGTTATGGAGGAAGCCAAGGAAATCTCATCTTT	TRAV12-2	0	TRAJ42	TRAV12	TRAJ42	CAVARSYGGSQGNLIF	TGTGCCGTGGCACGGAGTTATGGAGGAAGCCAAGGAAATCTCATCTTT	:::::::::0:-4:9:::::14:-1:48:::	CD8
440	TGTGCCCCTCCTCCTTTATAACACCGACAAGCTCATCTTT	TRAV38-1	0	TRAJ34	TRAV38	TRAJ34	CAPPPL*_TDKLIF	TGTGCCCCTCCTCCTTTATAACACCGACAAGCTCATCTTT	:::::::::0:-12:5:::::15:-2:40:::	CD8
441	TGTGCTGTGGGTATTACACTTTGGAAATGAGAAATTAACCTTT	TRAV8-3	0	TRAJ48	TRAV8	TRAJ48	CAVGITL_GNEKLTF	TGTGCTGTGGGTATTACACTTTGGAAATGAGAAATTAACCTTT	:::::::::0:-2:12:::::11:0:43:::	CD8
442	TGTGCTGTGAGTTCTTATAGCACATTCATCTTT	TRAV21	0	TRAJ14	TRAV21	TRAJ14	CAVSSYSTFIF	TGTGCTGTGAGTTCTTATAGCACATTCATCTTT	:::::::::0:-1:11:::::14:-2:33:::	CD8
443	TGTGCAGGTTCCGATAGCAACTATCAGTTAATCTGG	TRAV27	0	TRAJ33	TRAV27	TRAJ33	CAGSDSNYQLIW	TGTGCAGGTTCCGATAGCAACTATCAGTTAATCTGG	:::::::::0:-2:8:::::12:-2:36:::	CD8
444	TGTGCAGGAGTAGGCCCTAATGCAGGCAACATGCTCACCTTT	TRAV27	0	TRAJ39	TRAV27	TRAJ39	CAGVGPNAGNMLTF	TGTGCAGGAGTAGGCCCTAATGCAGGCAACATGCTCACCTTT	:::::::::0:0:10:::::17:-7:42:::	CD8
445	TGTGCCACTGTGGATTGGAACCAGGGAGGAAAGCTTATCTTC	TRAV1-2	0	TRAJ23	TRAV1	TRAJ23	CATVDWNQGGKLIF	TGTGCCACTGTGGATTGGAACCAGGGAGGAAAGCTTATCTTC	:::::::::0:-9:5:::::18:-8:42:::	CD4
446	TGTGCTCTGAGTGAGCTCGGTAACCAGTTCTATTTT	TRAV19	0	TRAJ49	TRAV19	TRAJ49	CALSELGNQFYF	TGTGCTCTGAGTGAGCTCGGTAACCAGTTCTATTTT	:::::::::0:-2:15:::::17:-6:36:::	CD8
447	TGCATCGTCAGAGTCGGAGCAGGAAACACACCTCTTGTCTTT	TRAV26-1	0	TRAJ29	TRAV26	TRAJ29	CIVRVGAGNTPLVF	TGCATCGTCAGAGTCGGAGCAGGAAACACACCTCTTGTCTTT	:::::::::0:0:16:::::19:-6:42:::	CD4
448	TGTGCTGGGTTTTTCAGATGGCCAGAAGCTGCTCTTT	TRAV21	0	TRAJ16	TRAV21	TRAJ16	CAGFFR_GQKLLF	TGTGCTGGGTTTTTCAGATGGCCAGAAGCTGCTCTTT	:::::::::0:-5:7:::::10:-2:37:::	CD4
449	TGCATCCTGAAGGAACAGGCAAACTAATCTTT	TRAV26-2	0	TRAJ37	TRAV26	TRAJ37	CILKE_GKLIF	TGCATCCTGAAGGAACAGGCAAACTAATCTTT	:::::::::0:-5:10:::::14:-13:32:::	CD8
450	TGTGCTCTCTTCCCCAAGCTCATCTTT	TRAV41	0	TRAJ34	TRAV41	TRAJ34	CALFPKLIF	TGTGCTCTCTTCCCCAAGCTCATCTTT	:::::::::0:-3:9:::::14:-14:27:::	CD8
451	TGTGCTACGGACGGGAGAGGAGGAAGCCAAGGAAATCTCATCTTT	TRAV17	0	TRAJ42	TRAV17	TRAJ42	CATDGRGGSQGNLIF	TGTGCTACGGACGGGAGAGGAGGAAGCCAAGGAAATCTCATCTTT	:::::::::0:0:13:::::18:-8:45:::	CD8
452	TGTGCAATGAGCGACCCTTATAACACCGACAAGCTCATCTTT	TRAV12-3	0	TRAJ34	TRAV12	TRAJ34	CAMSDPYNTDKLIF	TGTGCAATGAGCGACCCTTATAACACCGACAAGCTCATCTTT	:::::::::0:0:13:::::16:-1:42:::	CD8
453	TGTGCAGGAGTCCAGGAATATGGAAACAAACTGGTCTTT	TRAV25	0	TRAJ47	TRAV25	TRAJ47	CAGVQEYGNKLVF	TGTGCAGGAGTCCAGGAATATGGAAACAAACTGGTCTTT	:::::::::0:-1:8:::::10:4:39:::	CD8
454	TGTGCAGAGAACCTTAATAATGCAGGCAACATGCTCACCTTT	TRAV13-2	0	TRAJ39	TRAV13	TRAJ39	CAENLNNAGNMLTF	TGTGCAGAGAACCTTAATAATGCAGGCAACATGCTCACCTTT	:::::::::0:-2:11:::::14:-4:42:::	CD8
455	TGTGCTGTGAGTCCCCTGGGCGGATCTGAAAAGCTGGTCTTT	TRAV8-4	0	TRAJ57	TRAV8	TRAJ57	CAVSPLGGSEKLVF	TGTGCTGTGAGTCCCCTGGGCGGATCTGAAAAGCTGGTCTTT	:::::::::0:-2:12:::::17:-7:42:::	CD8
456	TGTGCCTTACAAGATGACAAGATCATCTTT	TRAV12-2	0	TRAJ30	TRAV12	TRAJ30	CALQDDKIIF	TGTGCCTTACAAGATGACAAGATCATCTTT	:::::::::0:-7:6:::::8:-3:30:::	CD8
457	TGTGCCTTTGCCCTCCGGGCGGTTCTGCAAGGCAACTGACCTTT	TRAV24	0	TRAJ22	TRAV24	TRAJ22	CAFALRA_SARQLTF	TGTGCCTTTGCCCTCCGGGCGGTTCTGCAAGGCAACTGACCTTT	:::::::::0:-1:9:::::20:-8:44:::	CD8
458	TGCATCCTGAGACTTTTTTGGACCGGCACTGCCAGTAAACTCACCTTT	TRAV26-2	0	TRAJ44	TRAV26	TRAJ44	CILRLFWTGTASKLTF	TGCATCCTGAGACTTTTTTGGACCGGCACTGCCAGTAAACTCACCTTT	:::::::::0:-3:12:::::21:-5:48:::	CD8
459	TGTGCTGGCCTTTCCTTATCTAAAGCTGCAGGCAACAAGCTAACTTTT	TRAV35	0	TRAJ17	TRAV35	TRAJ17	CAGLSLSKAAGNKLTF	TGTGCTGGCCTTTCCTTATCTAAAGCTGCAGGCAACAAGCTAACTTTT	:::::::::0:-4:8:::::17:-2:48:::	CD8
460	TGTGCTTATAGGAGCGCGCTCAAACCCGACAGCTGGGGGAAATTGCAGTTT	TRAV38-2DV8	0	TRAJ24	TRAV38	TRAJ24	CAYRSALKPDSWGKLQF	TGTGCTTATAGGAGCGCGCTCAAACCCGACAGCTGGGGGAAATTGCAGTTT	:::::::::0:0:16:::::27:-8:51:::	CD4
461	TGTGCAGCAAGCATCCCCAATAACAATGACATGCGCTTT	TRAV23DV6	0	TRAJ43	TRAV23	TRAJ43	CAASIPNNNDMRF	TGTGCAGCAAGCATCCCCAATAACAATGACATGCGCTTT	:::::::::0:0:13:::::17:-1:39:::	CD8
462	TGTGCCGTGACTGATGACAAGATCATCTTT	TRAV12-2	0	TRAJ30	TRAV12	TRAJ30	CAVTDDKIIF	TGTGCCGTGACTGATGACAAGATCATCTTT	:::::::::0:-3:10:::::12:-8:30:::	CD8
463	TGTGCAGAGAGCGACTCTGGGGCTGGGAGTTACCAACTCACTTTC	TRAV13-2	0	TRAJ28	TRAV13	TRAJ28	CAESDSGAGSYQLTF	TGTGCAGAGAGCGACTCTGGGGCTGGGAGTTACCAACTCACTTTC	:::::::::0:-3:10:::::13:-3:45:::	CD8
464	TGTGCTGTGAGTGAAAGTCGATCAGGAGGAGGTGCTGACGGACTCACCTTT	TRAV8-4	0	TRAJ45	TRAV8	TRAJ45	CAVSESRSGGGADGLTF	TGTGCTGTGAGTGAAAGTCGATCAGGAGGAGGTGCTGACGGACTCACCTTT	:::::::::0:0:14:::::21:-5:51:::	CD4
465	TGTGGCACAGAGGATAGACGGAAAGGTTCTGCAAGGCAACTGACCTTT	TRAV30	0	TRAJ22	TRAV30	TRAJ22	CGTEDRRKGSARQLTF	TGTGGCACAGAGGATAGACGGAAAGGTTCTGCAAGGCAACTGACCTTT	:::::::::0:-1:12:::::24:-8:48:::	CD8
466	TGTGCTGTGAGTGATCAAGGTAGCAACTATAAACTGACATTT	TRAV8-6	0	TRAJ53	TRAV8	TRAJ53	CAVSDQGSNYKLTF	TGTGCTGTGAGTGATCAAGGTAGCAACTATAAACTGACATTT	:::::::::0:0:14:::::17:-10:42:::	CD4
467	TGTGCCGTCCACAACTATCAGTTAATCTGG	TRAV12-2	0	TRAJ33	TRAV12	TRAJ33	CAVHNYQLIW	TGTGCCGTCCACAACTATCAGTTAATCTGG	:::::::::0:-5:8:::::11:-7:30:::	CD8
468	TGTGCAGAGACGGGAGGCTTCAAAACTATCTTT	TRAV5	0	TRAJ9	TRAV5	TRAJ9	CAETGGFKTIF	TGTGCAGAGACGGGAGGCTTCAAAACTATCTTT	:::::::::0:-3:10:::::9:-6:33:::	CD8
469	TGTGCTGTGGATCGGACAACTGACAGCTGGGGGAAATTGCAGTTT	TRAV8-3	0	TRAJ24	TRAV8	TRAJ24	CAVDRTTDSWGKLQF	TGTGCTGTGGATCGGACAACTGACAGCTGGGGGAAATTGCAGTTT	:::::::::0:-4:10:::::14:-1:45:::	CD8
470	TGTGCCGTGAACGGGGATGGCCAGAAGCTGCTCTTT	TRAV12-2	0	TRAJ16	TRAV12	TRAJ16	CAVNGDGQKLLF	TGTGCCGTGAACGGGGATGGCCAGAAGCTGCTCTTT	:::::::::0:-1:12:::::15:-8:36:::	CD8
471	TGTGCCGTGAAGGGGGACAAGATCATCTTT	TRAV12-2	0	TRAJ30	TRAV12	TRAJ30	CAVKGDKIIF	TGTGCCGTGAAGGGGGACAAGATCATCTTT	:::::::::0:-2:11:::::15:-11:30:::	CD8
472	TGTGCTCTGAGTGAGGCGGATAGTGGAGGTAGCAACTATAAACTGACATTT	TRAV19	0	TRAJ53	TRAV19	TRAJ53	CALSEADSGGSNYKLTF	TGTGCTCTGAGTGAGGCGGATAGTGGAGGTAGCAACTATAAACTGACATTT	:::::::::0:0:17:::::19:-3:51:::	CD8
473	TGTGCAGCAAGTAATGGTGGGAACAGAGATGACAAGATCATCTTT	TRAV13-1	0	TRAJ30	TRAV13	TRAJ30	CAASNGGNRDDKIIF	TGTGCAGCAAGTAATGGTGGGAACAGAGATGACAAGATCATCTTT	:::::::::0:0:13:::::20:-1:45:::	CD4
474	TGTGGAGCGGGAGCTGCTCTGATCTTT	TRAV34	0	TRAJ15	TRAV34	TRAJ15	CGAGAALIF	TGTGGAGCGGGAGCTGCTCTGATCTTT	:::::::::0:-5:8:::::6:-8:27:::	CD8
475	TGTGCAGCAAGAACCCCTGCTGGCAACAACCGTAAGCTGATTTGG	TRAV29DV5	0	TRAJ38	TRAV29	TRAJ38	CAARTPAGNNRKLIW	TGTGCAGCAAGAACCCCTGCTGGCAACAACCGTAAGCTGATTTGG	:::::::::0:-2:11:::::17:-3:45:::	CD8
476	TGTGCAGGAGCTATCGTAGAGTCGAATGACATGCGCTTT	TRAV27	0	TRAJ43	TRAV27	TRAJ43	CAGAIVESNDMRF	TGTGCAGGAGCTATCGTAGAGTCGAATGACATGCGCTTT	:::::::::0:0:10:::::24:-8:39:::	CD8
477	TTTGCTGGTTCTGCAAGGCAACTGACCTTT	TRAV17	0	TRAJ22	TRAV17	TRAJ22	FAGSARQLTF	TTTGCTGGTTCTGCAAGGCAACTGACCTTT	:::::::::0:-7:6:::::4:-6:30:::	CD4
478	TGTGCTACGGACGCTGGTTACAAATTTTACTTT	TRAV17	0	TRAJ21	TRAV17	TRAJ21	CATDAGYKFYF	TGTGCTACGGACGCTGGTTACAAATTTTACTTT	:::::::::0:0:13:::::19:-10:33:::	CD8
479	TGTGCAGGAGCAGGGGAGGTGCTGACGGACTCACCTTT	TRAV27	0	TRAJ45	TRAV27	TRAJ45	CAGAGE_ADGLTF	TGTGCAGGAGCAGGGGAGGTGCTGACGGACTCACCTTT	:::::::::0:0:10:::::10:-6:38:::	CD8
480	TGTGCTACGGACGCGGGCTTCAACAAATTTTACTTT	TRAV17	0	TRAJ21	TRAV17	TRAJ21	CATDAGFNKFYF	TGTGCTACGGACGCGGGCTTCAACAAATTTTACTTT	:::::::::0:0:13:::::17:-5:36:::	CD8
481	TGTGCTGTGAGAGACAGTAGGGACTACAAGCTCAGCTTT	TRAV3	0	TRAJ20	TRAV3	TRAJ20	CAVRDSRDYKLSF	TGTGCTGTGAGAGACAGTAGGGACTACAAGCTCAGCTTT	:::::::::0:0:16:::::21:-8:39:::	CD8
482	TGTGCTGTGCAGGAGGGAGGAAAGCTTATCTTC	TRAV20	0	TRAJ23	TRAV20	TRAJ23	CAVQEGGKLIF	TGTGCTGTGCAGGAGGGAGGAAAGCTTATCTTC	:::::::::0:0:13:::::13:-12:33:::	CD4
483	TGTGCCGTTGTGGCCAGTAAACTCACCTTT	TRAV12-2	0	TRAJ44	TRAV12	TRAJ44	CAVVASKLTF	TGTGCCGTTGTGGCCAGTAAACTCACCTTT	:::::::::0:-5:8:::::12:-14:30:::	CD8
484	TGTGCTACGGACGGGGATAACAATGCCAGACTCATGTTT	TRAV17	0	TRAJ31	TRAV17	TRAJ31	CATDGDNNARLMF	TGTGCTACGGACGGGGATAACAATGCCAGACTCATGTTT	:::::::::0:0:13:::::13:0:39:::	CD8
485	TGTGTGGTGACCTCCTCCATACCTACATTT	TRAV12-1	0	TRAJ6	TRAV12	TRAJ6	CVVTSSIPTF	TGTGTGGTGACCTCCTCCATACCTACATTT	:::::::::0:-3:10:::::14:-15:30:::	CD8
486	TGTGTGGTGAGCCGGAGCACCGACAAGCTCATCTTT	TRAV10	0	TRAJ34	TRAV10	TRAJ34	CVVSRSTDKLIF	TGTGTGGTGAGCCGGAGCACCGACAAGCTCATCTTT	:::::::::0:-1:12:::::17:-8:36:::	CD8
487	TGTGGAGCAGACACACTGTTCTGCAAGGCAACTGACCTTT	TRAV34	0	TRAJ22	TRAV34	TRAJ22	CGADTLF_ARQLTF	TGTGGAGCAGACACACTGTTCTGCAAGGCAACTGACCTTT	:::::::::0:0:13:::::17:-9:40:::	CD8
488	TGTGCCGTGGCTGATGACAAGATCATCTTT	TRAV12-2	0	TRAJ30	TRAV12	TRAJ30	CAVADDKIIF	TGTGCCGTGGCTGATGACAAGATCATCTTT	:::::::::0:-4:9:::::12:-8:30:::	CD8
489	TGTGCAGTTCCTTCCCAAGAGGGCTACAATAAGCTGATTTTT	TRAV5	0	TRAJ4	TRAV5	TRAJ4	CAVPSQEGYNKLIF	TGTGCAGTTCCTTCCCAAGAGGGCTACAATAAGCTGATTTTT	:::::::::0:-6:7:::::21:-11:42:::	CD8
490	TGTGCAGCAAGCCCTTTCCAGGGAGGAAAGCTTATCTTC	TRAV29DV5	0	TRAJ23	TRAV29	TRAJ23	CAASPFQGGKLIF	TGTGCAGCAAGCCCTTTCCAGGGAGGAAAGCTTATCTTC	:::::::::0:-1:12:::::17:-10:39:::	CD8
491	TGTGCTGTGAAGTCGGCCAGACTCATGTTT	TRAV21	0	TRAJ31	TRAV21	TRAJ31	CAVKSARLMF	TGTGCTGTGAAGTCGGCCAGACTCATGTTT	:::::::::0:-2:10:::::15:-11:30:::	CD8
492	TGTGCAGCAAGCGATAGCAACTATAAACTGACATTT	TRAV29DV5	0	TRAJ53	TRAV29	TRAJ53	CAASDSNYKLTF	TGTGCAGCAAGCGATAGCAACTATAAACTGACATTT	:::::::::0:0:13:::::14:-13:36:::	CD8
493	TGTGCTGTCAGAAGGACCGGTAACCAGTTCTATTTT	TRAV41	0	TRAJ49	TRAV41	TRAJ49	CAVRRTGNQFYF	TGTGCTGTCAGAAGGACCGGTAACCAGTTCTATTTT	:::::::::0:0:12:::::15:-4:36:::	CD4
494	TGTGCTTATAGGAGCGGGCGGAAAACCAGTGGCTCTAGGTTGACCTTT	TRAV38-2DV8	0	TRAJ58	TRAV38	TRAJ58	CAYRSGRKTSGSRLTF	TGTGCTTATAGGAGCGGGCGGAAAACCAGTGGCTCTAGGTTGACCTTT	:::::::::0:0:16:::::22:-6:48:::	CD4
495	TGTGCAGCAAGCGCTAGAACCGGTAACCAGTTCTATTTT	TRAV29DV5	0	TRAJ49	TRAV29	TRAJ49	CAASARTGNQFYF	TGTGCAGCAAGCGCTAGAACCGGTAACCAGTTCTATTTT	:::::::::0:0:13:::::18:-4:39:::	CD8
496	TGTGTGGTGAGCGTGAATGCAGGCAACATGCTCACCTTT	TRAV10	0	TRAJ39	TRAV10	TRAJ39	CVVSVNAGNMLTF	TGTGTGGTGAGCGTGAATGCAGGCAACATGCTCACCTTT	:::::::::0:0:13:::::15:-8:39:::	CD8
497	TGTGTGGTGACCCCCGACTACAAGCTCAGCTTT	TRAV12-1	0	TRAJ20	TRAV12	TRAJ20	CVVTPDYKLSF	TGTGTGGTGACCCCCGACTACAAGCTCAGCTTT	:::::::::0:-3:10:::::14:-7:33:::	CD8
498	TGTGTGGTGAACTTATGGGCGAGAGGAAGCTACATACCTACATTT	TRAV12-1	0	TRAJ6	TRAV12	TRAJ6	CVVNLWARGSYIPTF	TGTGTGGTGAACTTATGGGCGAGAGGAAGCTACATACCTACATTT	:::::::::0:-1:12:::::22:-8:45:::	CD8
499	TGTGCTCTGAGTGAGGGAGCGGGCTTTGGAAATGAGAAATTAACCTTT	TRAV19	0	TRAJ48	TRAV19	TRAJ48	CALSEGAGFGNEKLTF	TGTGCTCTGAGTGAGGGAGCGGGCTTTGGAAATGAGAAATTAACCTTT	:::::::::0:-1:16:::::23:-7:48:::	CD8
500	TGTCTCCTTTTTGGGAATGTGCTGCATTGC	TRAV40	0	TRAJ35	TRAV40	TRAJ35	CLLFGNVLHC	TGTCTCCTTTTTGGGAATGTGCTGCATTGC	:::::::::0:-6:8:::::9:-7:30:::	CD8
501	TGTGCCGTCAGCGCAGGCAAATCAACCTTT	TRAV12-2	0	TRAJ27	TRAV12	TRAJ27	CAVSAGKSTF	TGTGCCGTCAGCGCAGGCAAATCAACCTTT	:::::::::0:-5:8:::::12:-10:30:::	CD8
502	TGTGTGGTGAACACTGACTACAAGCTCAGCTTT	TRAV12-1	0	TRAJ20	TRAV12	TRAJ20	CVVNTDYKLSF	TGTGTGGTGAACACTGACTACAAGCTCAGCTTT	:::::::::0:0:13:::::15:-8:33:::	CD8
503	TGTGTGGTCGGGGCCGACAAGCTCATCTTT	TRAV12-1	0	TRAJ34	TRAV12	TRAJ34	CVVGADKLIF	TGTGTGGTCGGGGCCGACAAGCTCATCTTT	:::::::::0:-5:8:::::13:-10:30:::	CD8
504	TGTGCTGGGCTTCTCCATGGAGGAAGCCAAGGAAATCTCATCTTT	TRAV35	0	TRAJ42	TRAV35	TRAJ42	CAGLLHGGSQGNLIF	TGTGCTGGGCTTCTCCATGGAGGAAGCCAAGGAAATCTCATCTTT	:::::::::0:-2:10:::::16:-6:45:::	CD8
505	TGTGCTGTGAGTGATCTCGGTAACCAGTTCTATTTT	TRAV8-6	0	TRAJ49	TRAV8	TRAJ49	CAVSDLGNQFYF	TGTGCTGTGAGTGATCTCGGTAACCAGTTCTATTTT	:::::::::0:0:14:::::17:-6:36:::	CD8
506	TGTGCTGTGACCGAATCTGGTTCTGCAAGGCAACTGACCTTT	TRAV8-4	0	TRAJ22	TRAV8	TRAJ22	CAVTESGSARQLTF	TGTGCTGTGACCGAATCTGGTTCTGCAAGGCAACTGACCTTT	:::::::::0:-4:10:::::15:-5:42:::	CD4
507	TGTGCTGCGTCCTTTTCTGGTGGCTACAATAAGCTGATTTTT	TRAV2	0	TRAJ4	TRAV2	TRAJ4	CAASFSGGYNKLIF	TGTGCTGCGTCCTTTTCTGGTGGCTACAATAAGCTGATTTTT	:::::::::0:-7:7:::::12:-2:42:::	CD4
508	TGTGCCGTGAATGCTGTAGCTGACAGCTGGGGGAAATTGCAGTTT	TRAV8-1	0	TRAJ24	TRAV8	TRAJ24	CAVNAVADSWGKLQF	TGTGCCGTGAATGCTGTAGCTGACAGCTGGGGGAAATTGCAGTTT	:::::::::0:0:14:::::19:-6:45:::	CD8
509	TGTGCCGTGACCGGCACCGACAAGCTCATCTTT	TRAV12-2	0	TRAJ34	TRAV12	TRAJ34	CAVTGTDKLIF	TGTGCCGTGACCGGCACCGACAAGCTCATCTTT	:::::::::0:-3:10:::::14:-8:33:::	CD8
510	TGTGCTGTGAGAACCTGGATAGGGGGAAGCCAAGGAAATCTCATCTTT	TRAV8-6	0	TRAJ42	TRAV8	TRAJ42	CAVRTWIGGSQGNLIF	TGTGCTGTGAGAACCTGGATAGGGGGAAGCCAAGGAAATCTCATCTTT	:::::::::0:-3:11:::::21:-8:48:::	CD4
511	TGTGCCTTTATCATACAGGGTAACCAGTTCTATTTT	TRAV24	0	TRAJ49	TRAV24	TRAJ49	CAFIIQGNQFYF	TGTGCCTTTATCATACAGGGTAACCAGTTCTATTTT	:::::::::0:0:10:::::18:-7:36:::	CD8
512	TGTGCCGCGTCAGATGACAAGATCATCTTT	TRAV12-2	0	TRAJ30	TRAV12	TRAJ30	CAASDDKIIF	TGTGCCGCGTCAGATGACAAGATCATCTTT	:::::::::0:-6:7:::::11:-7:30:::	CD8
513	TGTGCAGCAAATAGGGAAGCCCAGAAGCTGGTATTT	TRAV23DV6	0	TRAJ54	TRAV23	TRAJ54	CAANREAQKLVF	TGTGCAGCAAATAGGGAAGCCCAGAAGCTGGTATTT	:::::::::0:-3:10:::::12:-6:36:::	CD8
514	TGTGCCGTCGGAGGAAGCTACATACCTACATTT	TRAV12-2	0	TRAJ6	TRAV12	TRAJ6	CAVGGSYIPTF	TGTGCCGTCGGAGGAAGCTACATACCTACATTT	:::::::::0:-5:8:::::9:-7:33:::	CD8
515	TGTGCTACGGACTCGCACTATAACACCGACAAGCTCATCTTT	TRAV17	0	TRAJ34	TRAV17	TRAJ34	CATDSHYNTDKLIF	TGTGCTACGGACTCGCACTATAACACCGACAAGCTCATCTTT	:::::::::0:-1:12:::::18:-3:42:::	CD8
516	TGTGCTGTGAGCAACTACCCCCGAGGGGCTGGGAGTTACCAACTCACTTTC	TRAV8-4	0	TRAJ28	TRAV8	TRAJ28	CAVSNYPRGAGSYQLTF	TGTGCTGTGAGCAACTACCCCCGAGGGGCTGGGAGTTACCAACTCACTTTC	:::::::::0:-3:11:::::24:-8:51:::	CD8
517	TGTGCTGTGCGGCCGACAACTGACAGCTGGGGGAAATTGCAGTTT	TRAV20	0	TRAJ24	TRAV20	TRAJ24	CAVRPTTDSWGKLQF	TGTGCTGTGCGGCCGACAACTGACAGCTGGGGGAAATTGCAGTTT	:::::::::0:-3:10:::::14:-1:45:::	CD4
518	TGTGCAGGAGCTGGAAGCAACACAGGCAAACTAATCTTT	TRAV27	0	TRAJ37	TRAV27	TRAJ37	CAGAGSNTGKLIF	TGTGCAGGAGCTGGAAGCAACACAGGCAAACTAATCTTT	:::::::::0:0:10:::::16:-8:39:::	CD8
519	TGTGCCGTGAGCGCTTCCAAGATAATCTTT	TRAV12-2	0	TRAJ3	TRAV12	TRAJ3	CAVSASKIIF	TGTGCCGTGAGCGCTTCCAAGATAATCTTT	:::::::::0:-3:10:::::9:-10:30:::	CD8
520	TGTGCTCTGATGCCCTACACCAATGCAGGCAAATCAACCTTT	TRAV19	0	TRAJ27	TRAV19	TRAJ27	CALMPYTNAGKSTF	TGTGCTCTGATGCCCTACACCAATGCAGGCAAATCAACCTTT	:::::::::0:-7:10:::::16:-2:42:::	CD8
521	TGTGCCACTAATTCAGATGGCCAGAAGCTGCTCTTT	TRAV12-2	0	TRAJ16	TRAV12	TRAJ16	CATNSDGQKLLF	TGTGCCACTAATTCAGATGGCCAGAAGCTGCTCTTT	:::::::::0:-7:6:::::11:-4:36:::	CD8
522	TGCATCCTGAGAGACCTAATCGGTTCTGCAAGGCAACTGACCTTT	TRAV26-2	0	TRAJ22	TRAV26	TRAJ22	CILRDLIGSARQLTF	TGCATCCTGAGAGACCTAATCGGTTCTGCAAGGCAACTGACCTTT	:::::::::0:0:15:::::21:-8:45:::	CD8
523	TGTGCAATCACCCCCCCCCAGGGAGCCCAGAAGCTGGTATTT	TRAV12-3	0	TRAJ54	TRAV12	TRAJ54	CAITPPQGAQKLVF	TGTGCAATCACCCCCCCCCAGGGAGCCCAGAAGCTGGTATTT	:::::::::0:-5:8:::::18:-5:42:::	CD4
524	TGTGCCGTGATCGATGACAAGATCATCTTT	TRAV12-2	0	TRAJ30	TRAV12	TRAJ30	CAVIDDKIIF	TGTGCCGTGATCGATGACAAGATCATCTTT	:::::::::0:-3:10:::::12:-8:30:::	CD8
525	TGTGCTCTGGTCCAGGGAGGAAAGCTTATCTTC	TRAV9-2	0	TRAJ23	TRAV9	TRAJ23	CALVQGGKLIF	TGTGCTCTGGTCCAGGGAGGAAAGCTTATCTTC	:::::::::0:-5:9:::::11:-10:33:::	CD4
526	TGTGCCGTGAATCTTGGGGGTTACCAGAAAGTTACCTTT	TRAV12-2	0	TRAJ13	TRAV12	TRAJ13	CAVNLGGYQKVTF	TGTGCCGTGAATCTTGGGGGTTACCAGAAAGTTACCTTT	:::::::::0:-2:11:::::7:0:39:::	CD8
527	TGTGCCTCCTTCGTTGGGGGTTACCAGAAAGTTACCTTT	TRAV12-2	0	TRAJ13	TRAV12	TRAJ13	CASFVGGYQKVTF	TGTGCCTCCTTCGTTGGGGGTTACCAGAAAGTTACCTTT	:::::::::0:-7:6:::::14:-7:39:::	CD8
528	TGTGCTGGGCAGATCGGGTCTAACGGTAACCAGTTCTATTTT	TRAV35	0	TRAJ49	TRAV35	TRAJ49	CAGQIGSNGNQFYF	TGTGCTGGGCAGATCGGGTCTAACGGTAACCAGTTCTATTTT	:::::::::0:0:12:::::23:-6:42:::	CD8
529	TGTGCCGTGAATGTTCCGACTGACAGCTGGGGGAAATTGCAGTTT	TRAV8-1	0	TRAJ24	TRAV8	TRAJ24	CAVNVPTDSWGKLQF	TGTGCCGTGAATGTTCCGACTGACAGCTGGGGGAAATTGCAGTTT	:::::::::0:-1:13:::::18:-5:45:::	CD8
530	TGTGCTTATAGGAGCGCTTATGGAGGTAGCAACTATAAACTGACATTT	TRAV38-2DV8	0	TRAJ53	TRAV38	TRAJ53	CAYRSAYGGSNYKLTF	TGTGCTTATAGGAGCGCTTATGGAGGTAGCAACTATAAACTGACATTT	:::::::::0:0:16:::::20:-7:48:::	CD4
531	TGTGTGGTCCCCCCGCCGGGACTCACGGGAGGAGGAAACAAACTCACCTTT	TRAV12-1	0	TRAJ10	TRAV12	TRAJ10	CVVPPPGLTGGGNKLTF	TGTGTGGTCCCCCCGCCGGGACTCACGGGAGGAGGAAACAAACTCACCTTT	:::::::::0:-5:8:::::20:-2:51:::	CD8
532	TGTGCCGTAGGAGATGACAAGATCATCTTT	0	0	0	0	0	0	0	0	CD8
533	TGTGCCGCTAGAGATGACAAGATCATCTTT	TRAV12-2	0	TRAJ30	TRAV12	TRAJ30	CAARDDKIIF	TGTGCCGCTAGAGATGACAAGATCATCTTT	:::::::::0:-6:7:::::9:-5:30:::	CD8
534	TGTGCTCTTGGGGAACTTGAACAGGCAGGAACTGCTCTGATCTTT	TRDV1	0	TRAJ15	TRDV1	TRAJ15	CALGELEQAGTALIF	TGTGCTCTTGGGGAACTTGAACAGGCAGGAACTGCTCTGATCTTT	:::::::::0:0:17:::::21:-5:45:::	CD8
535	TGTGCCGTGACGAGCGACAAGCTCATCTTT	TRAV12-2	0	TRAJ34	TRAV12	TRAJ34	CAVTSDKLIF	TGTGCCGTGACGAGCGACAAGCTCATCTTT	:::::::::0:-3:10:::::14:-11:30:::	CD8
536	TGTGCTCTGAGTGAGGCGTACGGCGGGGGTTATGGAGGAAGCCAAGGAAATCTCATCTTT	TRAV19	0	TRAJ42	TRAV19	TRAJ42	CALSEAYGGGYGGSQGNLIF	TGTGCTCTGAGTGAGGCGTACGGCGGGGGTTATGGAGGAAGCCAAGGAAATCTCATCTTT	:::::::::0:0:17:::::29:-4:60:::	CD8
537	TGTGCCCTTGGGGATGACAAGATCATCTTT	TRAV12-2	0	TRAJ30	TRAV12	TRAJ30	CALGDDKIIF	TGTGCCCTTGGGGATGACAAGATCATCTTT	:::::::::0:-7:6:::::12:-8:30:::	CD8
538	TGCATCCTGAAGTTCTCGGGAGCCCAGAAGCTGGTATTT	TRAV26-2	0	TRAJ54	TRAV26	TRAJ54	CILKFSGAQKLVF	TGCATCCTGAAGTTCTCGGGAGCCCAGAAGCTGGTATTT	:::::::::0:-5:10:::::17:-7:39:::	CD8
539	TGCCTCGTGGGTGAAAAAGAGGGTGGCTCAGGAACCTACAAATACATCTTT	TRAV4	0	TRAJ40	TRAV4	TRAJ40	CLVGEKEGGSGTYKYIF	TGCCTCGTGGGTGAAAAAGAGGGTGGCTCAGGAACCTACAAATACATCTTT	:::::::::0:-2:14:::::26:-5:51:::	CD8
540	TGTGCTGTGAGTGACGATAATGCAGGCAACATGCTCACCTTT	TRAV8-6	0	TRAJ39	TRAV8	TRAJ39	CAVSDDNAGNMLTF	TGTGCTGTGAGTGACGATAATGCAGGCAACATGCTCACCTTT	:::::::::0:0:14:::::16:-6:42:::	CD4
541	TGTGCTGTGGTCCCTTCAACTGACAGCTGGGGGAAATTGCAGTTT	TRAV8-3	0	TRAJ24	TRAV8	TRAJ24	CAVVPSTDSWGKLQF	TGTGCTGTGGTCCCTTCAACTGACAGCTGGGGGAAATTGCAGTTT	:::::::::0:-4:10:::::16:-3:45:::	CD8
542	TGTGCCGTGGACGTGGTCCATGGAAACAAACTGGTCTTT	TRAV39	0	TRAJ47	TRAV39	TRAJ47	CAVDVVHGNKLVF	TGTGCCGTGGACGTGGTCCATGGAAACAAACTGGTCTTT	:::::::::0:-1:12:::::19:-6:39:::	CD8
543	TGTGCCGTGACCGCTGCCAGACTCATGTTT	TRAV12-2	0	TRAJ31	TRAV12	TRAJ31	CAVTAARLMF	TGTGCCGTGACCGCTGCCAGACTCATGTTT	:::::::::0:-3:10:::::14:-10:30:::	CD8
544	TGTGCAGTAACTCCGTCTAATGCTGGTGGTACTAGCTATGGAAAGCTGACATTT	TRAV25	0	TRAJ52	TRAV25	TRAJ52	CAVTPSNAGGTSYGKLTF	TGTGCAGTAACTCCGTCTAATGCTGGTGGTACTAGCTATGGAAAGCTGACATTT	:::::::::0:-2:7:::::16:0:54:::	CD8
545	TGTGCCGGCTTTTCAGGAGGAAGCTACATACCTACATTT	TRAV17	0	TRAJ6	TRAV17	TRAJ6	CAGFSGGSYIPTF	TGTGCCGGCTTTTCAGGAGGAAGCTACATACCTACATTT	:::::::::0:-8:5:::::12:-4:39:::	CD4
546	TGTGCTCTGAGTCGTTATAACACCGACAAGCTCATCTTT	TRAV19	0	TRAJ34	TRAV19	TRAJ34	CALSRYNTDKLIF	TGTGCTCTGAGTCGTTATAACACCGACAAGCTCATCTTT	:::::::::0:-5:12:::::14:-2:39:::	CD8
547	TGTGCTTTCATGGATGGCTCTAGCAACACAGGCAAACTAATCTTT	TRAV38-1	0	TRAJ37	TRAV38	TRAJ37	CAFMDGSSNTGKLIF	TGTGCTTTCATGGATGGCTCTAGCAACACAGGCAAACTAATCTTT	:::::::::0:-5:12:::::13:1:45:::	CD4
548	TGTGTGGTGAACAAGGACAACTTCAACAAATTTTACTTT	TRAV12-1	0	TRAJ21	TRAV12	TRAJ21	CVVNKDNFNKFYF	TGTGTGGTGAACAAGGACAACTTCAACAAATTTTACTTT	:::::::::0:0:13:::::16:-1:39:::	CD8
549	TGTGCAGTCGGCATGGAATATGGAAACAAACTGGTCTTT	TRAV27	0	TRAJ47	TRAV27	TRAJ47	CAVGMEYGNKLVF	TGTGCAGTCGGCATGGAATATGGAAACAAACTGGTCTTT	:::::::::0:-3:7:::::11:2:39:::	CD8
550	TGTGCTGTGGAGCTGCTCGGCTCTAGCAACACAGGCAAACTAATCTTT	TRAV22	0	TRAJ37	TRAV22	TRAJ37	CAVELLGSSNTGKLIF	TGTGCTGTGGAGCTGCTCGGCTCTAGCAACACAGGCAAACTAATCTTT	:::::::::0:0:13:::::18:-1:48:::	CD4
551	TGTGCCGCTGTAGATGACAAGATCATCTTT	TRAV12-2	0	TRAJ30	TRAV12	TRAJ30	CAAVDDKIIF	TGTGCCGCTGTAGATGACAAGATCATCTTT	:::::::::0:-6:7:::::11:-7:30:::	CD8
552	TGTGCCGGCCCGGGCAGGAGAGCACTTACTTTT	TRAV21	0	TRAJ5	TRAV21	TRAJ5	CAGPGRRALTF	TGTGCCGGCCCGGGCAGGAGAGCACTTACTTTT	:::::::::0:-7:5:::::10:-6:33:::	CD8
553	TGTGCTCTTCCTGCGGGGGGTAGCAACTATAAACTGACATTT	TRAV9-2	0	TRAJ53	TRAV9	TRAJ53	CALPAGGSNYKLTF	TGTGCTCTTCCTGCGGGGGGTAGCAACTATAAACTGACATTT	:::::::::0:-6:8:::::15:-8:42:::	CD8
554	TGTGCCGTGACCCATGCCAGACTCATGTTT	TRAV12-2	0	TRAJ31	TRAV12	TRAJ31	CAVTHARLMF	TGTGCCGTGACCCATGCCAGACTCATGTTT	:::::::::0:-3:10:::::13:-9:30:::	CD8
555	TGTGCTACGGACGAACAGAACAATGCCAGACTCATGTTT	TRAV17	0	TRAJ31	TRAV17	TRAJ31	CATDEQNNARLMF	TGTGCTACGGACGAACAGAACAATGCCAGACTCATGTTT	:::::::::0:0:13:::::18:-5:39:::	CD8
556	TGTGCTTTCATGATGGTATGGGGAAGCCAAGGAAATCTCATCTTT	TRAV38-1	0	TRAJ42	TRAV38	TRAJ42	CAFMMVWGSQGNLIF	TGTGCTTTCATGATGGTATGGGGAAGCCAAGGAAATCTCATCTTT	:::::::::0:-4:13:::::6:4:45:::	CD8
557	TGTGCAGAGGGTGTAACTCAGGGCGGATCTGAAAAGCTGGTCTTT	TRAV13-2	0	TRAJ57	TRAV13	TRAJ57	CAEGVTQGGSEKLVF	TGTGCAGAGGGTGTAACTCAGGGCGGATCTGAAAAGCTGGTCTTT	:::::::::0:-4:9:::::13:0:45:::	CD8
558	TGTGCCGTGAACAGGGAAACTGACAGCTGGGGGAAATTGCAGTTT	TRAV12-2	0	TRAJ24	TRAV12	TRAJ24	CAVNRETDSWGKLQF	TGTGCCGTGAACAGGGAAACTGACAGCTGGGGGAAATTGCAGTTT	:::::::::0:0:13:::::17:-4:45:::	CD8
559	TGTGCCGTGACCCTTAATACTGGAGGCTTCAAAACTATCTTT	TRAV12-2	0	TRAJ9	TRAV12	TRAJ9	CAVTLNTGGFKTIF	TGTGCCGTGACCCTTAATACTGGAGGCTTCAAAACTATCTTT	:::::::::0:-3:10:::::15:-3:42:::	CD4
560	TGTGCTGTGAGTGGGATGTTTTCTGGTGGCTACAATAAGCTGATTTTT	TRAV8-4	0	TRAJ4	TRAV8	TRAJ4	CAVSGMFSGGYNKLIF	TGTGCTGTGAGTGGGATGTTTTCTGGTGGCTACAATAAGCTGATTTTT	:::::::::0:-1:13:::::15:1:48:::	CD4
561	TGTGCTGTGGTTTAACTTCAGGAGGAGGTGCTGACGGACTCACCTTT	TRAV8-3	0	TRAJ45	TRAV8	TRAJ45	CAVV*LQE_GADGLTF	TGTGCTGTGGTTTAACTTCAGGAGGAGGTGCTGACGGACTCACCTTT	:::::::::0:-4:10:::::16:-4:47:::	CD8
562	TGCATCCTGAGAGACGCTTCTGGGGCTGGGAGTTACCAACTCACTTTC	TRAV26-2	0	TRAJ28	TRAV26	TRAJ28	CILRDASGAGSYQLTF	TGCATCCTGAGAGACGCTTCTGGGGCTGGGAGTTACCAACTCACTTTC	:::::::::0:0:15:::::18:-5:48:::	CD8
563	TGTGCCGTGAAAAGTAGAGATGACAAGATCATCTTT	TRAV12-2	0	TRAJ30	TRAV12	TRAJ30	CAVKSRDDKIIF	TGTGCCGTGAAAAGTAGAGATGACAAGATCATCTTT	:::::::::0:-2:11:::::15:-5:36:::	CD8
564	TGTGCTACGGACTTCTTCACCAATGCAGGCAAATCAACCTTT	TRAV17	0	TRAJ27	TRAV17	TRAJ27	CATDFFTNAGKSTF	TGTGCTACGGACTTCTTCACCAATGCAGGCAAATCAACCTTT	:::::::::0:-1:12:::::17:-3:42:::	CD8
565	TGTGCTGTGAGCCCCCCCGGCACAGGCTTTCAGAAACTTGTATTT	TRAV3	0	TRAJ8	TRAV3	TRAJ8	CAVSPPGTGFQKLVF	TGTGCTGTGAGCCCCCCCGGCACAGGCTTTCAGAAACTTGTATTT	:::::::::0:-5:11:::::20:-4:45:::	CD4
566	TGTGCTTTCATGAACCGCCCAACTGGGGCAAACAACCTCTTCTTT	TRAV38-1	0	TRAJ36	TRAV38	TRAJ36	CAFMNRPTGANNLFF	TGTGCTTTCATGAACCGCCCAACTGGGGCAAACAACCTCTTCTTT	:::::::::0:-3:14:::::20:-3:45:::	CD4
567	TGTGCCGTGACCAGTGACAAGATCATCTTT	TRAV12-2	0	TRAJ30	TRAV12	TRAJ30	CAVTSDKIIF	TGTGCCGTGACCAGTGACAAGATCATCTTT	:::::::::0:0:13:::::14:-10:30:::	CD8
568	TGTGCTGTGGGTGAGGCGTAATGGTGGCTACAATAAGCTGATTTTT	TRAV8-3	0	TRAJ4	TRAV8	TRAJ4	CAVGEA*W_GYNKLIF	TGTGCTGTGGGTGAGGCGTAATGGTGGCTACAATAAGCTGATTTTT	:::::::::0:-1:13:::::21:-7:46:::	CD8
569	TGTGCCTCTACTTCAGGAAACACACCTCTTGTCTTT	TRAV24	0	TRAJ29	TRAV24	TRAJ29	CASTSGNTPLVF	TGTGCCTCTACTTCAGGAAACACACCTCTTGTCTTT	:::::::::0:0:10:::::11:-4:36:::	CD4
570	TGTGCTTCCCTTTATGGCTCTAGCAACACAGGCAAACTAATCTTT	TRAV38-1	0	TRAJ37	TRAV38	TRAJ37	CASLYGSSNTGKLIF	TGTGCTTCCCTTTATGGCTCTAGCAACACAGGCAAACTAATCTTT	:::::::::0:-10:7:::::13:1:45:::	CD4
571	TGTGCCGTGACGGGGGCAAACAACCTCTTCTTT	TRAV12-2	0	TRAJ36	TRAV12	TRAJ36	CAVTGANNLFF	TGTGCCGTGACGGGGGCAAACAACCTCTTCTTT	:::::::::0:-3:10:::::9:-4:33:::	CD8
572	TGTGCTCCGGGATCAGGGCGCTTT	TRAV38-2DV8	0	TRAJ43	TRAV38	TRAJ43	CAPGSGRF	TGTGCTCCGGGATCAGGGCGCTTT	:::::::::0:-10:6:::::17:-16:24:::	CD8
573	TGTGCTCTGAAGTCTCCGATGGATAGCAGCTATAAATTGATCTTC	TRAV9-2	0	TRAJ12	TRAV9	TRAJ12	CALKSPMDSSYKLIF	TGTGCTCTGAAGTCTCCGATGGATAGCAGCTATAAATTGATCTTC	:::::::::0:-4:10:::::14:3:45:::	CD4
574	TGTGCTGTGGGTGGCGGGGCAAACAACCTCTTCTTT	TRAV21	0	TRAJ36	TRAV21	TRAJ36	CAVGGGANNLFF	TGTGCTGTGGGTGGCGGGGCAAACAACCTCTTCTTT	:::::::::0:-3:9:::::15:-7:36:::	CD4
575	TGTGCTTATCTTATGTGGACCGGCACTGCCAGTAAACTCACCTTT	TRAV38-2DV8	0	TRAJ44	TRAV38	TRAJ44	CAYLMWTGTASKLTF	TGTGCTTATCTTATGTGGACCGGCACTGCCAGTAAACTCACCTTT	:::::::::0:-7:9:::::18:-5:45:::	CD8
576	TGTGGAGCAGACAGTAATGGTGGTACTAGCTATGGAAAGCTGACATTT	TRAV34	0	TRAJ52	TRAV34	TRAJ52	CGADSNGGTSYGKLTF	TGTGGAGCAGACAGTAATGGTGGTACTAGCTATGGAAAGCTGACATTT	:::::::::0:0:13:::::17:-7:48:::	CD4
577	TGTGCTGTGAACCCCTCAGGAGGAAGCTACATACCTACATTT	TRAV21	0	TRAJ6	TRAV21	TRAJ6	CAVNPSGGSYIPTF	TGTGCTGTGAACCCCTCAGGAGGAAGCTACATACCTACATTT	:::::::::0:-2:10:::::15:-4:42:::	CD4
578	TGTGTGGTTACGGGTGACAAGATCATCTTT	TRAV12-1	0	TRAJ30	TRAV12	TRAJ30	CVVTGDKIIF	TGTGTGGTTACGGGTGACAAGATCATCTTT	:::::::::0:-5:8:::::14:-10:30:::	CD8
579	TGTGCCGTGATGAACGACAAGCTCATCTTT	TRAV12-2	0	TRAJ34	TRAV12	TRAJ34	CAVMNDKLIF	TGTGCCGTGATGAACGACAAGCTCATCTTT	:::::::::0:-3:10:::::14:-11:30:::	CD8
580	TGTGCTGTGAGGCCGAGGGCAGGAGGAAGCTACATACCTACATTT	TRAV21	0	TRAJ6	TRAV21	TRAJ6	CAVRPRAGGSYIPTF	TGTGCTGTGAGGCCGAGGGCAGGAGGAAGCTACATACCTACATTT	:::::::::0:0:12:::::19:-5:45:::	CD4
581	TGTGCTGTTAATAATGCAGGCAACATGCTCACCTTT	TRAV21	0	TRAJ39	TRAV21	TRAJ39	CAVNNAGNMLTF	TGTGCTGTTAATAATGCAGGCAACATGCTCACCTTT	:::::::::0:-4:8:::::8:-4:36:::	CD4
582	TGTGCAGCAAGTCTCCCAGGCTTTCAGAAACTTGTATTT	TRAV13-1	0	TRAJ8	TRAV13	TRAJ8	CAASLPGFQKLVF	TGTGCAGCAAGTCTCCCAGGCTTTCAGAAACTTGTATTT	:::::::::0:-1:12:::::16:-6:39:::	CD4
583	TGTGCTCATCCCGATAATGCAGGCAACATGCTCACCTTT	TRAV38-2DV8	0	TRAJ39	TRAV38	TRAJ39	CAHPDNAGNMLTF	TGTGCTCATCCCGATAATGCAGGCAACATGCTCACCTTT	:::::::::0:-7:9:::::13:-6:39:::	0
584	TGTGCTCTGGTAGACAACAGACTCGCTTTT	TRAV9-2	0	TRAJ7	TRAV9	TRAJ7	CALVDNRLAF	TGTGCTCTGGTAGACAACAGACTCGCTTTT	:::::::::0:-5:9:::::13:-11:30:::	CD8
585	TGTGCCCTCAGTGCTTCCAAGATAATCTTT	TRAV12-2	0	TRAJ3	TRAV12	TRAJ3	CALSASKIIF	TGTGCCCTCAGTGCTTCCAAGATAATCTTT	:::::::::0:-7:6:::::8:-9:30:::	CD8
586	TGCCTCGTGGGCCCGCGTAATAATGCAGGCAACATGCTCACCTTT	TRAV4	0	TRAJ39	TRAV4	TRAJ39	CLVGPRNNAGNMLTF	TGCCTCGTGGGCCCGCGTAATAATGCAGGCAACATGCTCACCTTT	:::::::::0:-5:11:::::17:-4:45:::	CD4
587	TGTGCCGTGAATGCAGACTACAAGCTCAGCTTT	TRAV8-1	0	TRAJ20	TRAV8	TRAJ20	CAVNADYKLSF	TGTGCCGTGAATGCAGACTACAAGCTCAGCTTT	:::::::::0:0:14:::::15:-8:33:::	CD8
588	TGTGCTCTGAGTGGGGGGGGGGGCTCTAGCAACACAGGCAAACTAATCTTT	TRAV19	0	TRAJ37	TRAV19	TRAJ37	CALSGGGGSSNTGKLIF	TGTGCTCTGAGTGGGGGGGGGGGCTCTAGCAACACAGGCAAACTAATCTTT	:::::::::0:-1:16:::::21:-1:51:::	CD8
589	TGTGCAGCAAGTATAGGAGGAAGCTACATACCTACATTT	TRAV13-1	0	TRAJ6	TRAV13	TRAJ6	CAASIGGSYIPTF	TGTGCAGCAAGTATAGGAGGAAGCTACATACCTACATTT	:::::::::0:0:13:::::14:-6:39:::	CD4
590	TGTGCCTTATGGACCCGTTTCAGATGGCCAGAAGCTGCTCTTT	TRAV12-2	0	TRAJ16	TRAV12	TRAJ16	CALWTRF_DGQKLLF	TGTGCCTTATGGACCCGTTTCAGATGGCCAGAAGCTGCTCTTT	:::::::::0:-7:6:::::17:-3:43:::	CD8
591	TGTGCTTTCATGATTTACGCAGGAAACACACCTCTTGTCTTT	TRAV38-1	0	TRAJ29	TRAV38	TRAJ29	CAFMIYAGNTPLVF	TGTGCTTTCATGATTTACGCAGGAAACACACCTCTTGTCTTT	:::::::::0:-4:13:::::19:-6:42:::	CD4
592	TGTGCAGAGCGGGTCTTGACTGGAGGCTTCAAAACTATCTTT	TRAV13-2	0	TRAJ9	TRAV13	TRAJ9	CAERVLTGGFKTIF	TGTGCAGAGCGGGTCTTGACTGGAGGCTTCAAAACTATCTTT	:::::::::0:-4:9:::::18:-6:42:::	CD4
593	TGCATCGTCAGATCACTGAACAGAGATGACAAGATCATCTTT	TRAV26-1	0	TRAJ30	TRAV26	TRAJ30	CIVRSLNRDDKIIF	TGCATCGTCAGATCACTGAACAGAGATGACAAGATCATCTTT	:::::::::0:-4:12:::::2:12:42:::	CD8
594	TGTGCACAGGATCTTTTGGTTCTAACGACTACAAGCTCAGCTTT	TRAV13-2	0	TRAJ20	TRAV13	TRAJ20	CAQDLLV_NDYKLSF	TGTGCACAGGATCTTTTGGTTCTAACGACTACAAGCTCAGCTTT	:::::::::0:-1:12:::::18:0:44:::	CD8
595	TGTGCAGAGGGTATAATAAGTCGTCCCTTAACTGGGGCAAACAACCTCTTCTTT	TRAV13-2	0	TRAJ36	TRAV13	TRAJ36	CAEGIISRPLTGANNLFF	TGTGCAGAGGGTATAATAAGTCGTCCCTTAACTGGGGCAAACAACCTCTTCTTT	:::::::::0:-4:9:::::29:-3:54:::	CD8
596	TGTGCAGCACCTCCCTACGTTCTAACGACTACAAGCTCAGCTTT	TRAV25	0	TRAJ20	TRAV25	TRAJ20	CAAPPYV_NDYKLSF	TGTGCAGCACCTCCCTACGTTCTAACGACTACAAGCTCAGCTTT	:::::::::0:-2:7:::::16:2:44:::	CD8
597	TGTGCTCTAAGTGGCCGTTCGGGGACAGGCAAACTAATCTTT	TRAV16	0	TRAJ37	TRAV16	TRAJ37	CALSGRSGTGKLIF	TGTGCTCTAAGTGGCCGTTCGGGGACAGGCAAACTAATCTTT	:::::::::0:0:14:::::24:-13:42:::	CD4
598	TGTGCAGCCTCGATGGATAGCAGCTATAAATTGATCTTC	TRAV13-1	0	TRAJ12	TRAV13	TRAJ12	CAASMDSSYKLIF	TGTGCAGCCTCGATGGATAGCAGCTATAAATTGATCTTC	:::::::::0:-5:8:::::11:-1:39:::	CD4
599	TGCATCGCCCGGACCCCGAACAGAGATGACAAGATCATCTTT	TRAV26-1	0	TRAJ30	TRAV26	TRAJ30	CIARTPNRDDKIIF	TGCATCGCCCGGACCCCGAACAGAGATGACAAGATCATCTTT	:::::::::0:-9:7:::::17:-1:42:::	CD8
600	TGTGCTCTTGGGGATGGGGCCTCAGGAACCTACAAATACATCTTT	TRDV1	0	TRAJ40	TRDV1	TRAJ40	CALGDGASGTYKYIF	TGTGCTCTTGGGGATGGGGCCTCAGGAACCTACAAATACATCTTT	:::::::::0:-3:14:::::19:-4:45:::	CD8
601	TGTGCTGTGAGTGTAAGTAACCAGGGAGGAAAGCTTATCTTC	TRAV8-4	0	TRAJ23	TRAV8	TRAJ23	CAVSVSNQGGKLIF	TGTGCTGTGAGTGTAAGTAACCAGGGAGGAAAGCTTATCTTC	:::::::::0:-1:13:::::17:-7:42:::	CD8
602	TGTGCAGACCGGGGGTACTGGAGGCTTCAAAACTATCTTT	TRAV12-3	0	TRAJ9	TRAV12	TRAJ9	CADRGYW_GFKTIF	TGTGCAGACCGGGGGTACTGGAGGCTTCAAAACTATCTTT	:::::::::0:-7:6:::::15:-5:40:::	CD8
603	TGTGCTCTGAGTGAGGAGTTGAGGAACAGAGATGACAAGATCATCTTT	TRAV19	0	TRAJ30	TRAV19	TRAJ30	CALSEELRNRDDKIIF	TGTGCTCTGAGTGAGGAGTTGAGGAACAGAGATGACAAGATCATCTTT	:::::::::0:-1:16:::::17:5:48:::	CD8
604	TGCCTCGTGGGTGAAAGGTCTAGCAACACAGGCAAACTAATCTTT	TRAV4	0	TRAJ37	TRAV4	TRAJ37	CLVGERSSNTGKLIF	TGCCTCGTGGGTGAAAGGTCTAGCAACACAGGCAAACTAATCTTT	:::::::::0:-2:14:::::18:-4:45:::	CD8
605	TGTGTGGTGATTGACCTAACTTTGGAAATGAGAAATTAACCTTT	TRAV12-1	0	TRAJ48	TRAV12	TRAJ48	CVVIDLT_GNEKLTF	TGTGTGGTGATTGACCTAACTTTGGAAATGAGAAATTAACCTTT	:::::::::0:-3:10:::::15:-3:44:::	CD8
606	TGTGCAACTTTTATTCAGGGAGCCCAGAAGCTGGTATTT	TRAV12-3	0	TRAJ54	TRAV12	TRAJ54	CATFIQGAQKLVF	TGTGCAACTTTTATTCAGGGAGCCCAGAAGCTGGTATTT	:::::::::0:-6:7:::::12:-2:39:::	CD4
607	TGTGCAGCAAGTATCCGACAGGGAGCCCAGAAGCTGGTATTT	TRAV13-1	0	TRAJ54	TRAV13	TRAJ54	CAASIRQGAQKLVF	TGTGCAGCAAGTATCCGACAGGGAGCCCAGAAGCTGGTATTT	:::::::::0:0:13:::::18:-5:42:::	CD8
608	TGTGCCGACACCGGCACTGCCAGTAAACTCACCTTT	TRAV39	0	TRAJ44	TRAV39	TRAJ44	CADTGTASKLTF	TGTGCCGACACCGGCACTGCCAGTAAACTCACCTTT	:::::::::0:-6:7:::::9:-5:36:::	CD8
609	TGTGCAATGAGAGAGGCCCCAGAATACAGCACCCTCACCTTT	TRAV14DV4	0	TRAJ11	TRAV14	TRAJ11	CAMREAPEYSTLTF	TGTGCAATGAGAGAGGCCCCAGAATACAGCACCCTCACCTTT	:::::::::0:-1:16:::::19:-6:42:::	CD8
610	TGTGCAGCAAGTCCGCTATCAGGAACCTACAAATACATCTTT	TRAV13-1	0	TRAJ40	TRAV13	TRAJ40	CAASPLSGTYKYIF	TGTGCAGCAAGTCCGCTATCAGGAACCTACAAATACATCTTT	:::::::::0:-1:12:::::18:-6:42:::	CD4
611	CCCCACCTCACGGGAGGAGGAAACAAACTCACCTTT	TRAV25	0	TRAJ10	TRAV25	TRAJ10	PHLTGGGNKLTF	CCCCACCTCACGGGAGGAGGAAACAAACTCACCTTT	:::::::::0:-9:0:::::6:-3:36:::	CD8
612	TGTGCTCTAGACATATCAAATACCGGCACTGCCAGTAAACTCACCTTT	TRAV6	0	TRAJ44	TRAV6	TRAJ44	CALDISNTGTASKLTF	TGTGCTCTAGACATATCAAATACCGGCACTGCCAGTAAACTCACCTTT	:::::::::0:0:13:::::13:2:48:::	CD8
613	TGTGCTCTGAGTGAGGCCGCCCTTTTGCTTGACGGCACTGCCAGTAAACTCACCTTT	TRAV19	0	TRAJ44	TRAV19	TRAJ44	CALSEAALLLDGTASKLTF	TGTGCTCTGAGTGAGGCCGCCCTTTTGCTTGACGGCACTGCCAGTAAACTCACCTTT	:::::::::0:0:17:::::32:-7:57:::	CD8
614	TGCATCCTGAGAGTGCGAGCTGCAGGCAACAAGCTAACTTTT	TRAV26-2	0	TRAJ17	TRAV26	TRAJ17	CILRVRAAGNKLTF	TGCATCCTGAGAGTGCGAGCTGCAGGCAACAAGCTAACTTTT	:::::::::0:-2:13:::::17:-7:42:::	CD4
615	TGTCTTCTGGGAGAAGGAGGAAATGAGAAATTAACCTTT	TRAV40	0	TRAJ48	TRAV40	TRAJ48	CLLGEGGNEKLTF	TGTCTTCTGGGAGAAGGAGGAAATGAGAAATTAACCTTT	:::::::::0:0:14:::::18:-11:39:::	CD8
616	TGTGCCGCCGGAGATGACAAGATCATCTTT	TRAV12-2	0	TRAJ30	TRAV12	TRAJ30	CAAGDDKIIF	TGTGCCGCCGGAGATGACAAGATCATCTTT	:::::::::0:-6:7:::::10:-6:30:::	CD8
617	TGTGCAGCAAGCGCGCAGGGAGGTAGCAACTATAAACTGACATTT	TRAV29DV5	0	TRAJ53	TRAV29	TRAJ53	CAASAQGGSNYKLTF	TGTGCAGCAAGCGCGCAGGGAGGTAGCAACTATAAACTGACATTT	:::::::::0:0:13:::::18:-8:45:::	CD4
618	TGTGCCGGACTCGGGGACAGAGATGACAAGATCATCTTT	TRAV8-1	0	TRAJ30	TRAV8	TRAJ30	CAGLGDRDDKIIF	TGTGCCGGACTCGGGGACAGAGATGACAAGATCATCTTT	:::::::::0:-7:7:::::16:-3:39:::	CD8
619	TGCGCTGTGAGAGGCCGCTATAACAATGCCAGACTCATGTTT	TRAV1-1	0	TRAJ31	TRAV1	TRAJ31	CAVRGRYNNARLMF	TGCGCTGTGAGAGGCCGCTATAACAATGCCAGACTCATGTTT	:::::::::0:-1:13:::::19:-3:42:::	CD4
620	TGTGCCGTGATTGGCAATACTGGAGGCTTCAAAACTATCTTT	TRAV12-2	0	TRAJ9	TRAV12	TRAJ9	CAVIGNTGGFKTIF	TGTGCCGTGATTGGCAATACTGGAGGCTTCAAAACTATCTTT	:::::::::0:-3:10:::::12:0:42:::	CD4
621	TGTGCTGTGAGAGACATGTATAGTGTTAACAATGCCAGACTCATGTTT	TRAV3	0	TRAJ31	TRAV3	TRAJ31	CAVRDMYSVNNARLMF	TGTGCTGTGAGAGACATGTATAGTGTTAACAATGCCAGACTCATGTTT	:::::::::0:0:16:::::26:-4:48:::	CD8
622	TGTGCTGTGAGAAGGGCTCCGGAATAACAATGCCAGACTCATGTTT	TRAV21	0	TRAJ31	TRAV21	TRAJ31	CAVRRAPE_NNARLMF	TGTGCTGTGAGAAGGGCTCCGGAATAACAATGCCAGACTCATGTTT	:::::::::0:-1:11:::::17:3:46:::	CD8
623	TGTGCCGCACCCCCTTATAATGCAGGCAACATGCTCACCTTT	TRAV12-2	0	TRAJ39	TRAV12	TRAJ39	CAAPPYNAGNMLTF	TGTGCCGCACCCCCTTATAATGCAGGCAACATGCTCACCTTT	:::::::::0:-6:7:::::16:-6:42:::	CD8
624	TGCCTCGTGGGAGGAACAATGCCAGACTCATGTTT	TRAV4	0	TRAJ31	TRAV4	TRAJ31	CLVGGT_ARLMF	TGCCTCGTGGGAGGAACAATGCCAGACTCATGTTT	:::::::::0:-5:11:::::14:-5:35:::	CD8
625	TGTGCTGTGGTAGCAGGAACTGCTCTGATCTTT	TRAV22	0	TRAJ15	TRAV22	TRAJ15	CAVVAGTALIF	TGTGCTGTGGTAGCAGGAACTGCTCTGATCTTT	:::::::::0:0:14:::::12:-8:33:::	CD8
626	TGTGCAGCAGGGTCTGGAGGCTTCAAAACTATCTTT	TRAV13-1	0	TRAJ9	TRAV13	TRAJ9	CAAGSGGFKTIF	TGTGCAGCAGGGTCTGGAGGCTTCAAAACTATCTTT	:::::::::0:-4:9:::::13:-7:36:::	CD8
627	TGTGCCCCGGTAAGGGGCCAGAAGCTGCTCTTT	TRAV24	0	TRAJ16	TRAV24	TRAJ16	CAPVRGQKLLF	TGTGCCCCGGTAAGGGGCCAGAAGCTGCTCTTT	:::::::::0:-4:6:::::15:-11:33:::	CD8
628	TGTGCAGCAAGGGGCTATAACACCGACAAGCTCATCTTT	TRAV29DV5	0	TRAJ34	TRAV29	TRAJ34	CAARGYNTDKLIF	TGTGCAGCAAGGGGCTATAACACCGACAAGCTCATCTTT	:::::::::0:-2:11:::::15:-3:39:::	CD8
629	TGTGCAGCAAGTATCGGCGAGAGGTTCTGCAAGGCAACTGACCTTT	TRAV13-1	0	TRAJ22	TRAV13	TRAJ22	CAASIGER_SARQLTF	TGTGCAGCAAGTATCGGCGAGAGGTTCTGCAAGGCAACTGACCTTT	:::::::::0:0:13:::::22:-8:46:::	CD4
630	TGTGCTACGGACGCAGATGGTGAGAACACCGACAAGCTCATCTTT	TRAV17	0	TRAJ34	TRAV17	TRAJ34	CATDADGENTDKLIF	TGTGCTACGGACGCAGATGGTGAGAACACCGACAAGCTCATCTTT	:::::::::0:0:13:::::24:-6:45:::	CD8
631	TGTGCCGTGAACATCGACACTGACAGCTGGGGGAAATTGCAGTTT	TRAV12-2	0	TRAJ24	TRAV12	TRAJ24	CAVNIDTDSWGKLQF	TGTGCCGTGAACATCGACACTGACAGCTGGGGGAAATTGCAGTTT	:::::::::0:0:13:::::11:2:45:::	CD8
632	TGTGCTGTCAGGTCAAATTCCGGGTATGCACTCAACTTC	TRAV41	0	TRAJ41	TRAV41	TRAJ41	CAVRSNSGYALNF	TGTGCTGTCAGGTCAAATTCCGGGTATGCACTCAACTTC	:::::::::0:-1:11:::::12:-4:39:::	CD8
633	TGCATCGTCAGAGTCGGAAACCAGGCAGGAACTGCTCTGATCTTT	TRAV26-1	0	TRAJ15	TRAV26	TRAJ15	CIVRVGNQAGTALIF	TGCATCGTCAGAGTCGGAAACCAGGCAGGAACTGCTCTGATCTTT	:::::::::0:0:16:::::18:-2:45:::	CD4
634	TGTGCCGTGCACACAGGCAAACTAATCTTT	TRAV12-2	0	TRAJ37	TRAV12	TRAJ37	CAVHTGKLIF	TGTGCCGTGCACACAGGCAAACTAATCTTT	:::::::::0:0:13:::::10:-11:30:::	CD8
635	TGTGCGGTTTACAGCAGTGCTTCCAAGATAATCTTT	TRAV13-1	0	TRAJ3	TRAV13	TRAJ3	CAVYSSASKIIF	TGTGCGGTTTACAGCAGTGCTTCCAAGATAATCTTT	:::::::::0:-8:5:::::9:-4:36:::	CD4
636	TGTGCAATGAGAGACGATGCATCAGGAGGAAGCTACATACCTACATTT	TRAV14DV4	0	TRAJ6	TRAV14	TRAJ6	CAMRDDASGGSYIPTF	TGTGCAATGAGAGACGATGCATCAGGAGGAAGCTACATACCTACATTT	:::::::::0:-3:14:::::16:1:48:::	CD4
637	TGTGCAAGACCCACCGGTAACCAGTTCTATTTT	TRAV12-3	0	TRAJ49	TRAV12	TRAJ49	CARPTGNQFYF	TGTGCAAGACCCACCGGTAACCAGTTCTATTTT	:::::::::0:-6:7:::::11:-3:33:::	CD8
638	TGTGCTGTGAACACGGGGAGCAACTATCAGTTAATCTGG	TRAV21	0	TRAJ33	TRAV21	TRAJ33	CAVNTGSNYQLIW	TGTGCTGTGAACACGGGGAGCAACTATCAGTTAATCTGG	:::::::::0:-2:10:::::18:-5:39:::	CD4
639	TGTGCCGTGAACGACTCCGGCACTGCCAGTAAACTCACCTTT	TRAV12-2	0	TRAJ44	TRAV12	TRAJ44	CAVNDSGTASKLTF	TGTGCCGTGAACGACTCCGGCACTGCCAGTAAACTCACCTTT	:::::::::0:-1:12:::::16:-6:42:::	CD8
640	TGTGCAATGAGAGAGGGCGAGGTGGACGGGAACAACAGACTCGCTTTT	TRAV14DV4	0	TRAJ7	TRAV14	TRAJ7	CAMREGEVDGNNRLAF	TGTGCAATGAGAGAGGGCGAGGTGGACGGGAACAACAGACTCGCTTTT	:::::::::0:0:17:::::27:-7:48:::	CD8
641	TGTGTTGTGAGTGATCAAACGGGCAGGAGAGCACTTACTTTT	TRAV8-2	0	TRAJ5	TRAV8	TRAJ5	CVVSDQTGRRALTF	TGTGTTGTGAGTGATCAAACGGGCAGGAGAGCACTTACTTTT	:::::::::0:0:14:::::18:-5:42:::	CD4
642	TGTGCAGCAAGTGAACGATTTAACAATGACATGCGCTTT	TRAV13-1	0	TRAJ43	TRAV13	TRAJ43	CAASERFNNDMRF	TGTGCAGCAAGTGAACGATTTAACAATGACATGCGCTTT	:::::::::0:-1:12:::::20:-4:39:::	CD8
643	TGTGCTCTGACCTCCTCTAGCAACACAGGCAAACTAATCTTT	TRAV19	0	TRAJ37	TRAV19	TRAJ37	CALTSSSNTGKLIF	TGTGCTCTGACCTCCTCTAGCAACACAGGCAAACTAATCTTT	:::::::::0:-7:10:::::14:-3:42:::	CD8
644	TGTGCAGAGATTGCGAACACCGGTAACCAGTTCTATTTT	TRAV13-2	0	TRAJ49	TRAV13	TRAJ49	CAEIANTGNQFYF	TGTGCAGAGATTGCGAACACCGGTAACCAGTTCTATTTT	:::::::::0:-3:10:::::13:1:39:::	CD8
645	TGTGCAGGACCTCAGGGAGCCCAGAAGCTGGTATTT	TRAV27	0	TRAJ54	TRAV27	TRAJ54	CAGPQGAQKLVF	TGTGCAGGACCTCAGGGAGCCCAGAAGCTGGTATTT	:::::::::0:-1:9:::::11:-4:36:::	CD4
646	TGTGCAGCAAGTACCAGGCAGGAACTGCTCTGATCTTT	TRAV13-1	0	TRAJ15	TRAV13	TRAJ15	CAASTR_GTALIF	TGTGCAGCAAGTACCAGGCAGGAACTGCTCTGATCTTT	:::::::::0:0:13:::::12:-3:38:::	CD8
647	TGTGCCGTTAACAATGCCAGACTCATGTTT	TRAV12-2	0	TRAJ31	TRAV12	TRAJ31	CAVNNARLMF	TGTGCCGTTAACAATGCCAGACTCATGTTT	:::::::::0:0:13:::::8:-4:30:::	CD4
648	TGTGCTGCGATCACATATGGAAACAAACTGGTCTTT	TRAV21	0	TRAJ47	TRAV21	TRAJ47	CAAITYGNKLVF	TGTGCTGCGATCACATATGGAAACAAACTGGTCTTT	:::::::::0:-2:10:::::14:-4:36:::	CD8
649	TGTGCTCTACCCCGTATTCAGGAGGAGGTGCTGACGGACTCACCTTT	TRAV16	0	TRAJ45	TRAV16	TRAJ45	CALPRIQE_GADGLTF	TGTGCTCTACCCCGTATTCAGGAGGAGGTGCTGACGGACTCACCTTT	:::::::::0:-5:9:::::13:-1:47:::	CD8
650	TGTGCCGGGGATCTGGGGGTTACCAGAAAGTTACCTTT	TRAV8-4	0	TRAJ13	TRAV8	TRAJ13	CAGDLG_YQKVTF	TGTGCCGGGGATCTGGGGGTTACCAGAAAGTTACCTTT	:::::::::0:-9:5:::::11:-5:38:::	CD8
651	TGTGCAGAGAATGATGCGGACAAGATCATCTTT	TRAV13-2	0	TRAJ30	TRAV13	TRAJ30	CAENDADKIIF	TGTGCAGAGAATGATGCGGACAAGATCATCTTT	:::::::::0:-1:12:::::18:-11:33:::	CD8
652	TGTGCTATTGGGACCTCTATGGCAGGCAACATGCTCACCTTT	TRAV17	0	TRAJ39	TRAV17	TRAJ39	CAIGTSMAGNMLTF	TGTGCTATTGGGACCTCTATGGCAGGCAACATGCTCACCTTT	:::::::::0:-6:7:::::21:-11:42:::	CD8
653	TGCGCTGTGAGAGCTCTGGGCCTTTTGAATGATGCTGGCAACAACCGTAAGCTGATTTGG	TRAV1-1	0	TRAJ38	TRAV1	TRAJ38	CAVRALGLLNDAGNNRKLIW	TGCGCTGTGAGAGCTCTGGGCCTTTTGAATGATGCTGGCAACAACCGTAAGCTGATTTGG	:::::::::0:-1:13:::::28:1:60:::	CD8
654	TGTGCTGTGGAGAATAGGAGGAAGCTACATACCTACATTT	TRAV22	0	TRAJ6	TRAV22	TRAJ6	CAVENRR_SYIPTF	TGTGCTGTGGAGAATAGGAGGAAGCTACATACCTACATTT	:::::::::0:-1:12:::::15:-6:40:::	CD4
655	TGTGCCTTCGTCACTGACAGCTGGGGGAAATTGCAGTTT	TRAV24	0	TRAJ24	TRAV24	TRAJ24	CAFVTDSWGKLQF	TGTGCCTTCGTCACTGACAGCTGGGGGAAATTGCAGTTT	:::::::::0:-2:8:::::12:-5:39:::	CD8
656	TGTGCCGTGAACTCTAACCAGTTCTATTTT	TRAV12-2	0	TRAJ49	TRAV12	TRAJ49	CAVNSNQFYF	TGTGCCGTGAACTCTAACCAGTTCTATTTT	:::::::::0:-1:12:::::14:-9:30:::	CD8
657	TGTGCAGAGAACCCATCCAACCAGGCAGGAACTGCTCTGATCTTT	TRAV13-2	0	TRAJ15	TRAV13	TRAJ15	CAENPSNQAGTALIF	TGTGCAGAGAACCCATCCAACCAGGCAGGAACTGCTCTGATCTTT	:::::::::0:-2:11:::::16:0:45:::	CD8
658	TGTGCTACCTCTTTAGGCGACTACAAGCTCAGCTTT	TRAV21	0	TRAJ20	TRAV21	TRAJ20	CATSLGDYKLSF	TGTGCTACCTCTTTAGGCGACTACAAGCTCAGCTTT	:::::::::0:-6:6:::::17:-7:36:::	CD4
659	TGTGCTACGGCCGGTTACTCTGGGGCTGGGAGTTACCAACTCACTTTC	TRAV17	0	TRAJ28	TRAV17	TRAJ28	CATAGYSGAGSYQLTF	TGTGCTACGGCCGGTTACTCTGGGGCTGGGAGTTACCAACTCACTTTC	:::::::::0:0:13:::::15:-2:48:::	CD4
660	TGTGCAGGAGTAGCTATCGGGGATGACAAGATCATCTTT	TRAV27	0	TRAJ30	TRAV27	TRAJ30	CAGVAIGDDKIIF	TGTGCAGGAGTAGCTATCGGGGATGACAAGATCATCTTT	:::::::::0:0:10:::::21:-8:39:::	CD8
661	TGTGCTGTGAAGAGTAGTGGAGGTAGCAACTATAAACTGACATTT	TRAV21	0	TRAJ53	TRAV21	TRAJ53	CAVKSSGGSNYKLTF	TGTGCTGTGAAGAGTAGTGGAGGTAGCAACTATAAACTGACATTT	:::::::::0:-2:10:::::10:0:45:::	CD4
662	TGTGCTTTCATGCCCCACAGAGGTGGTACTAGCTATGGAAAGCTGACATTT	TRAV38-1	0	TRAJ52	TRAV38	TRAJ52	CAFMPHRGGTSYGKLTF	TGTGCTTTCATGCCCCACAGAGGTGGTACTAGCTATGGAAAGCTGACATTT	:::::::::0:-5:12:::::21:-8:51:::	CD4
663	TGTGCCTACTCAACTGACAGCTGGGGGAAATTGCAGTTT	TRAV24	0	TRAJ24	TRAV24	TRAJ24	CAYSTDSWGKLQF	TGTGCCTACTCAACTGACAGCTGGGGGAAATTGCAGTTT	:::::::::0:-3:7:::::10:-3:39:::	CD8
664	TGTGCCTTCGGGAATTATGGAGGAAGCCAAGGAAATCTCATCTTT	TRAV38-1	0	TRAJ42	TRAV38	TRAJ42	CAFGNYGGSQGNLIF	TGTGCCTTCGGGAATTATGGAGGAAGCCAAGGAAATCTCATCTTT	:::::::::0:-8:9:::::11:-1:45:::	CD4
665	TGTGCTCTAAGTCCGAGAGAGGCTACCTCAGGAACCTACAAATACATCTTT	TRAV16	0	TRAJ40	TRAV16	TRAJ40	CALSPREATSGTYKYIF	TGTGCTCTAAGTCCGAGAGAGGCTACCTCAGGAACCTACAAATACATCTTT	:::::::::0:-2:12:::::22:-1:51:::	CD8
666	TGTGCCGTGAACTTCATAGATCGTGGTGGTACTAGCTATGGAAAGCTGACATTT	TRAV12-2	0	TRAJ52	TRAV12	TRAJ52	CAVNFIDRGGTSYGKLTF	TGTGCCGTGAACTTCATAGATCGTGGTGGTACTAGCTATGGAAAGCTGACATTT	:::::::::0:-1:12:::::23:-7:54:::	CD4
667	TGTGCCGTGGCTGCGGCCGGGCTCACCTTT	TRAV12-2	0	TRAJ39	TRAV12	TRAJ39	CAVAAAGLTF	TGTGCCGTGGCTGCGGCCGGGCTCACCTTT	:::::::::0:-4:9:::::20:-22:30:::	CD8
668	TGTGCAGCAAGCTGGGATGGAGGAAGCCAAGGAAATCTCATCTTT	TRAV29DV5	0	TRAJ42	TRAV29	TRAJ42	CAASWDGGSQGNLIF	TGTGCAGCAAGCTGGGATGGAGGAAGCCAAGGAAATCTCATCTTT	:::::::::0:-1:12:::::16:-6:45:::	CD8
669	TGCCTCGTGGGTGAGAGATCAGGATACAGCACCCTCACCTTT	TRAV4	0	TRAJ11	TRAV4	TRAJ11	CLVGERSGYSTLTF	TGCCTCGTGGGTGAGAGATCAGGATACAGCACCCTCACCTTT	:::::::::0:-2:14:::::18:-5:42:::	CD8
670	TGTGCCCCTTCGAATAATGCAGGCAACATGCTCACCTTT	TRAV21	0	TRAJ39	TRAV21	TRAJ39	CAPSNNAGNMLTF	TGTGCCCCTTCGAATAATGCAGGCAACATGCTCACCTTT	:::::::::0:-7:5:::::12:-5:39:::	CD4
671	TGTATACGGTCGGGGATTATGGTGGTGCTACAAACAAGCTCATCTTT	TRAV5	0	TRAJ32	TRAV5	TRAJ32	CIRSGIMV_ATNKLIF	TGTATACGGTCGGGGATTATGGTGGTGCTACAAACAAGCTCATCTTT	:::::::::0:-10:3:::::15:-3:47:::	CD8
672	TGCCTCGTGGGTTCGGGGTACAGCAGTGCTTCCAAGATAATCTTT	TRAV4	0	TRAJ3	TRAV4	TRAJ3	CLVGSGYSSASKIIF	TGCCTCGTGGGTTCGGGGTACAGCAGTGCTTCCAAGATAATCTTT	:::::::::0:-4:12:::::13:1:45:::	CD4
673	TGTGCTCTAAACCGTGGCGCCAATGCAGGCAAATCAACCTTT	TRAV16	0	TRAJ27	TRAV16	TRAJ27	CALNRGANAGKSTF	TGTGCTCTAAACCGTGGCGCCAATGCAGGCAAATCAACCTTT	:::::::::0:-4:10:::::19:-5:42:::	CD4
674	TGTGCTCTGAACTCTAGCAACACAGGCAAACTAATCTTT	TRAV19	0	TRAJ37	TRAV19	TRAJ37	CALNSSNTGKLIF	TGTGCTCTGAACTCTAGCAACACAGGCAAACTAATCTTT	:::::::::0:-7:10:::::11:-3:39:::	CD8
675	TGTGCTTCACTGCTCCAAGGGAGAGATGACAAGATCATCTTT	TRAV38-1	0	TRAJ30	TRAV38	TRAJ30	CASLLQGRDDKIIF	TGTGCTTCACTGCTCCAAGGGAGAGATGACAAGATCATCTTT	:::::::::0:-10:7:::::21:-5:42:::	CD8
676	TGTGCCTACGAAGATGACAAGATCATCTTT	TRAV24	0	TRAJ30	TRAV24	TRAJ30	CAYEDDKIIF	TGTGCCTACGAAGATGACAAGATCATCTTT	:::::::::0:-3:7:::::11:-7:30:::	CD8
677	TGTGCCGTGAGCCGCACCGACAAGCTCATCTTT	TRAV12-2	0	TRAJ34	TRAV12	TRAJ34	CAVSRTDKLIF	TGTGCCGTGAGCCGCACCGACAAGCTCATCTTT	:::::::::0:-3:10:::::14:-8:33:::	CD8
678	TGTGCAATGAGAGAGGGCAACGCCTTGAAGGGTCAGAATTTTGTCTTT	TRAV14DV4	0	TRAJ26	TRAV14	TRAJ26	CAMREGNALKGQNFVF	TGTGCAATGAGAGAGGGCAACGCCTTGAAGGGTCAGAATTTTGTCTTT	:::::::::0:0:17:::::30:-11:48:::	CD8
679	TGTGCTGTGCGTAATTGGGGAGAAACCAGTGGCTCTAGGTTGACCTTT	TRAV20	0	TRAJ58	TRAV20	TRAJ58	CAVRNWGETSGSRLTF	TGTGCTGTGCGTAATTGGGGAGAAACCAGTGGCTCTAGGTTGACCTTT	:::::::::0:-3:10:::::20:-4:48:::	CD4
680	TGTGCTGCCATTCCGAACACCGGTAACCAGTTCTATTTT	TRAV41	0	TRAJ49	TRAV41	TRAJ49	CAAIPNTGNQFYF	TGTGCTGCCATTCCGAACACCGGTAACCAGTTCTATTTT	:::::::::0:-2:10:::::13:1:39:::	CD8
681	TGTGCAGCATCGTGGAACTCAGATGGCCAGAAGCTGCTCTTT	TRAV13-1	0	TRAJ16	TRAV13	TRAJ16	CAASWNSDGQKLLF	TGTGCAGCATCGTGGAACTCAGATGGCCAGAAGCTGCTCTTT	:::::::::0:-4:9:::::18:-5:42:::	CD4
682	TGTGTGGTCGCCGACTACAAGCTCAGCTTT	TRAV12-1	0	TRAJ20	TRAV12	TRAJ20	CVVADYKLSF	TGTGTGGTCGCCGACTACAAGCTCAGCTTT	:::::::::0:-5:8:::::11:-7:30:::	CD8
683	TGTGCAGAGAGCATCTACTATGGTCAGAATTTTGTCTTT	TRAV13-2	0	TRAJ26	TRAV13	TRAJ26	CAESIYYGQNFVF	TGTGCAGAGAGCATCTACTATGGTCAGAATTTTGTCTTT	:::::::::0:-3:10:::::16:-6:39:::	CD4
684	TGTGCTGTGAGTGAATCGACCGGCACTGCCAGTAAACTCACCTTT	TRAV8-4	0	TRAJ44	TRAV8	TRAJ44	CAVSESTGTASKLTF	TGTGCTGTGAGTGAATCGACCGGCACTGCCAGTAAACTCACCTTT	:::::::::0:0:14:::::18:-5:45:::	CD4
685	TGTGCAATGAGATTCCACTTAGATGGCCAGAAGCTGCTCTTT	TRAV14DV4	0	TRAJ16	TRAV14	TRAJ16	CAMRFHLDGQKLLF	TGTGCAATGAGATTCCACTTAGATGGCCAGAAGCTGCTCTTT	:::::::::0:-5:12:::::20:-7:42:::	CD8
686	TGTGCTGTGGGCCCTAGAAGAGGAAGCCAAGGAAATCTCATCTTT	TRAV8-3	0	TRAJ42	TRAV8	TRAJ42	CAVGPRRGSQGNLIF	TGTGCTGTGGGCCCTAGAAGAGGAAGCCAAGGAAATCTCATCTTT	:::::::::0:-3:11:::::19:-9:45:::	CD4
687	TGTGCTGTCAGATCCTTCCGCGAAACCAGTGGCTCTAGGTTGACCTTT	TRAV41	0	TRAJ58	TRAV41	TRAJ58	CAVRSFRETSGSRLTF	TGTGCTGTCAGATCCTTCCGCGAAACCAGTGGCTCTAGGTTGACCTTT	:::::::::0:0:12:::::21:-5:48:::	CD8
688	TGTGCTGTGCCCCGTTCTGGTTCTGCAAGGCAACTGACCTTT	TRAV20	0	TRAJ22	TRAV20	TRAJ22	CAVPRSGSARQLTF	TGTGCTGTGCCCCGTTCTGGTTCTGCAAGGCAACTGACCTTT	:::::::::0:-3:10:::::14:-4:42:::	CD4
689	TGTGCTCTGAGTGCTGGCTCAGGAAACACACCTCTTGTCTTT	TRAV19	0	TRAJ29	TRAV19	TRAJ29	CALSAGSGNTPLVF	TGTGCTCTGAGTGCTGGCTCAGGAAACACACCTCTTGTCTTT	:::::::::0:-4:13:::::18:-5:42:::	CD8
690	TGCCTCGTGGGTGACTACTTCACACCTCTTGTCTTT	TRAV4	0	TRAJ29	TRAV4	TRAJ29	CLVGDYFTPLVF	TGCCTCGTGGGTGACTACTTCACACCTCTTGTCTTT	:::::::::0:-1:15:::::20:-13:36:::	CD8
691	TGTGCAATGATCTACACGGGAGGAGGAAACAAACTCACCTTT	TRAV12-3	0	TRAJ10	TRAV12	TRAJ10	CAMIYTGGGNKLTF	TGTGCAATGATCTACACGGGAGGAGGAAACAAACTCACCTTT	:::::::::0:-3:10:::::14:-5:42:::	CD4
692	TGTGCTCCACGGGGGAGGGCGGGAGGAGGAAACAAACTCACCTTT	TRAV19	0	TRAJ10	TRAV19	TRAJ10	CAPRGRAGGGNKLTF	TGTGCTCCACGGGGGAGGGCGGGAGGAGGAAACAAACTCACCTTT	:::::::::0:-10:7:::::19:-7:45:::	CD8
693	TGCATCGTCAGACCTCCGGGGGAATATGGAAACAAACTGGTCTTT	TRAV26-1	0	TRAJ47	TRAV26	TRAJ47	CIVRPPGEYGNKLVF	TGCATCGTCAGACCTCCGGGGGAATATGGAAACAAACTGGTCTTT	:::::::::0:-4:12:::::20:-1:45:::	CD8
694	TGTTCCTATGCCAGACTCATGTTT	TRAV12-1	0	TRAJ31	TRAV12	TRAJ31	CSYARLMF	TGTTCCTATGCCAGACTCATGTTT	:::::::::0:-10:3:::::7:-9:24:::	CD8
695	TGTGCTGTGAGCGGGGGGAACACAGGCTTTCAGAAACTTGTATTT	TRAV21	0	TRAJ8	TRAV21	TRAJ8	CAVSGGNTGFQKLVF	TGTGCTGTGAGCGGGGGGAACACAGGCTTTCAGAAACTTGTATTT	:::::::::0:-1:11:::::17:-1:45:::	CD4
696	TGTGCAGCACGAGTGGGTGACAAGATCATCTTT	TRAV29DV5	0	TRAJ30	TRAV29	TRAJ30	CAARVGDKIIF	TGTGCAGCACGAGTGGGTGACAAGATCATCTTT	:::::::::0:-4:9:::::17:-10:33:::	CD8
697	TGTGTGGGGGGGGCAAACAACCTCTTCTTT	TRAV12-1	0	TRAJ36	TRAV12	TRAJ36	CVGGANNLFF	TGTGTGGGGGGGGCAAACAACCTCTTCTTT	:::::::::0:-6:7:::::9:-7:30:::	CD8
698	TGTGTGGTGAGAAATTATGGAGGAAGCCAAGGAAATCTCATCTTT	TRAV10	0	TRAJ42	TRAV10	TRAJ42	CVVRNYGGSQGNLIF	TGTGTGGTGAGAAATTATGGAGGAAGCCAAGGAAATCTCATCTTT	:::::::::0:-2:11:::::12:-2:45:::	CD4
699	TGTGCAGGAGCAAAGGAGGCAGGCAACATGCTCACCTTT	TRAV27	0	TRAJ39	TRAV27	TRAJ39	CAGAKEAGNMLTF	TGTGCAGGAGCAAAGGAGGCAGGCAACATGCTCACCTTT	:::::::::0:0:10:::::18:-11:39:::	CD8
700	TGTGCCGGGGATAACTATGGTCAGAATTTTGTCTTT	TRAV12-2	0	TRAJ26	TRAV12	TRAJ26	CAGDNYGQNFVF	TGTGCCGGGGATAACTATGGTCAGAATTTTGTCTTT	:::::::::0:-6:7:::::4:3:36:::	CD8
701	TGTGTTGTGAGTCCAAACTGGGGCAAACAACCTCTTCTTT	TRAV8-2	0	TRAJ36	TRAV8	TRAJ36	CVVSPNW_ANNLFF	TGTGTTGTGAGTCCAAACTGGGGCAAACAACCTCTTCTTT	:::::::::0:-2:12:::::13:-1:40:::	CD8
702	TGTGCTTTCCTGAATTATAACACCGACAAGCTCATCTTT	TRAV38-1	0	TRAJ34	TRAV38	TRAJ34	CAFLNYNTDKLIF	TGTGCTTTCCTGAATTATAACACCGACAAGCTCATCTTT	:::::::::0:-3:14:::::14:-2:39:::	CD4
703	TGCATCCTGGAGACACCAATGCAGGCAAATCAACCTTT	TRAV26-2	0	TRAJ27	TRAV26	TRAJ27	CILETP_AGKSTF	TGCATCCTGGAGACACCAATGCAGGCAAATCAACCTTT	:::::::::0:0:14:::::12:-2:38:::	CD8
704	TGTGCAGCAAGTACGACATTTTCTGGTGGCTACAATAAGCTGATTTTT	TRAV13-1	0	TRAJ4	TRAV13	TRAJ4	CAASTTFSGGYNKLIF	TGTGCAGCAAGTACGACATTTTCTGGTGGCTACAATAAGCTGATTTTT	:::::::::0:0:13:::::18:-2:48:::	CD4
705	TGTGGAGCGCCGATTGGGGGAAGCCAAGGAAATCTCATCTTT	TRAV34	0	TRAJ42	TRAV34	TRAJ42	CGAPIGGSQGNLIF	TGTGGAGCGCCGATTGGGGGAAGCCAAGGAAATCTCATCTTT	:::::::::0:-5:8:::::14:-7:42:::	CD4
706	TGTGCAGCAAGACCATATAACACCGACAAGCTCATCTTT	TRAV29DV5	0	TRAJ34	TRAV29	TRAJ34	CAARPYNTDKLIF	TGTGCAGCAAGACCATATAACACCGACAAGCTCATCTTT	:::::::::0:-2:11:::::8:4:39:::	CD8
707	TGTGCTCCCTCCGGTGGGAACAACAGACTCGCTTTT	TRAV8-4	0	TRAJ7	TRAV8	TRAJ7	CAPSGGNNRLAF	TGTGCTCCCTCCGGTGGGAACAACAGACTCGCTTTT	:::::::::0:-8:6:::::14:-6:36:::	CD4
708	TGTGTGGGAGGGGAATATGGAAACAAACTGGTCTTT	TRAV12-1	0	TRAJ47	TRAV12	TRAJ47	CVGGEYGNKLVF	TGTGTGGGAGGGGAATATGGAAACAAACTGGTCTTT	:::::::::0:-6:7:::::11:-1:36:::	CD8
709	TGTGCAGCTAGTCCCGGTCAAACTGGGGCAAACAACCTCTTCTTT	TRAV13-1	0	TRAJ36	TRAV13	TRAJ36	CAASPGQTGANNLFF	TGTGCAGCTAGTCCCGGTCAAACTGGGGCAAACAACCTCTTCTTT	:::::::::0:-1:12:::::17:0:45:::	CD4
710	TGTGCTGGGACACTGCTGGTGGTACTAGCTATGGAAAGCTGACATTT	TRAV20	0	TRAJ52	TRAV20	TRAJ52	CAGTLLVV_SYGKLTF	TGTGCTGGGACACTGCTGGTGGTACTAGCTATGGAAAGCTGACATTT	:::::::::0:-6:7:::::13:-4:47:::	CD8
711	TGTGCCGTGAACTCAGATGGCCAGAAGCTGCTCTTT	TRAV12-2	0	TRAJ16	TRAV12	TRAJ16	CAVNSDGQKLLF	TGTGCCGTGAACTCAGATGGCCAGAAGCTGCTCTTT	:::::::::0:-1:12:::::12:-5:36:::	CD8
712	TGTGCGGTGAATTCTGGGGGTTACCAGAAAGTTACCTTT	TRAV13-1	0	TRAJ13	TRAV13	TRAJ13	CAVNSGGYQKVTF	TGTGCGGTGAATTCTGGGGGTTACCAGAAAGTTACCTTT	:::::::::0:-8:5:::::7:0:39:::	CD4
713	TGTGCCGTGAACTCAGACAAGCTCAGCTTT	TRAV12-2	0	TRAJ20	TRAV12	TRAJ20	CAVNSDKLSF	TGTGCCGTGAACTCAGACAAGCTCAGCTTT	:::::::::0:-1:12:::::16:-12:30:::	CD8
714	TGTGCTCTTGGGGACTTTGAGGCCTCCTACGACAAGGTGATATTT	TRDV1	0	TRAJ50	TRDV1	TRAJ50	CALGDFEASYDKVIF	TGTGCTCTTGGGGACTTTGAGGCCTCCTACGACAAGGTGATATTT	:::::::::0:-3:14:::::22:-6:45:::	CD4
715	TGTGCAATGGACGCCTGAGGGGGCTTATGGTGGTGCTACAAACAAGCTCATCTTT	TRAV12-3	0	TRAJ32	TRAV12	TRAJ32	CAMDA*GGL_GGATNKLIF	TGTGCAATGGACGCCTGAGGGGGCTTATGGTGGTGCTACAAACAAGCTCATCTTT	:::::::::0:-4:9:::::24:-4:55:::	CD8
716	TGTGCTGTGAGTGACACCACCAATGCAGGCAAATCAACCTTT	TRAV8-6	0	TRAJ27	TRAV8	TRAJ27	CAVSDTTNAGKSTF	TGTGCTGTGAGTGACACCACCAATGCAGGCAAATCAACCTTT	:::::::::0:0:14:::::17:-3:42:::	CD4
717	TGTGCCGTGAACAAGGAAACTGACAGCTGGGGGAAATTGCAGTTT	TRAV12-2	0	TRAJ24	TRAV12	TRAJ24	CAVNKETDSWGKLQF	TGTGCCGTGAACAAGGAAACTGACAGCTGGGGGAAATTGCAGTTT	:::::::::0:0:13:::::17:-4:45:::	CD8
718	TGTGCTACGGATGATACCGGCACTGCCAGTAAACTCACCTTT	TRAV17	0	TRAJ44	TRAV17	TRAJ44	CATDDTGTASKLTF	TGTGCTACGGATGATACCGGCACTGCCAGTAAACTCACCTTT	:::::::::0:-2:11:::::13:-3:42:::	CD8
719	TGTGCAGAGAATGCCGGGCGCAGCTATAAATTGATCTTC	TRAV13-2	0	TRAJ12	TRAV13	TRAJ12	CAENAGRSYKLIF	TGTGCAGAGAATGCCGGGCGCAGCTATAAATTGATCTTC	:::::::::0:-1:12:::::19:-9:39:::	CD4
720	TCTCACATGGGAGGAGGTGCTGACGGACTCACCTTT	TRAV21	0	TRAJ45	TRAV21	TRAJ45	SHMGGGADGLTF	TCTCACATGGGAGGAGGTGCTGACGGACTCACCTTT	:::::::::0:-11:1:::::9:-8:36:::	CD4
721	TGTGCCGTGATTGACGGCAGACTCATGTTT	TRAV12-2	0	TRAJ31	TRAV12	TRAJ31	CAVIDGRLMF	TGTGCCGTGATTGACGGCAGACTCATGTTT	:::::::::0:-3:10:::::17:-13:30:::	CD8
722	TGTGCTTATAGGAGCTATCTTCAGGGAGCCCAGAAGCTGGTATTT	TRAV38-2DV8	0	TRAJ54	TRAV38	TRAJ54	CAYRSYLQGAQKLVF	TGTGCTTATAGGAGCTATCTTCAGGGAGCCCAGAAGCTGGTATTT	:::::::::0:-1:15:::::19:-3:45:::	CD4
723	TGTGCCGTGAACGCGGATGACATGCGCTTT	TRAV12-2	0	TRAJ43	TRAV12	TRAJ43	CAVNADDMRF	TGTGCCGTGAACGCGGATGACATGCGCTTT	:::::::::0:-1:12:::::16:-9:30:::	CD8
724	TGTGCAGGACAGCGGGAATATGGAAACAAACTGGTCTTT	TRAV27	0	TRAJ47	TRAV27	TRAJ47	CAGQREYGNKLVF	TGTGCAGGACAGCGGGAATATGGAAACAAACTGGTCTTT	:::::::::0:-1:9:::::14:-1:39:::	CD8
725	TGCCTCGTGGGTGATTCTAATAATGCAGGCAACATGCTCACCTTT	TRAV4	0	TRAJ39	TRAV4	TRAJ39	CLVGDSNNAGNMLTF	TGCCTCGTGGGTGATTCTAATAATGCAGGCAACATGCTCACCTTT	:::::::::0:-2:14:::::17:-4:45:::	CD8
726	TGTGCCTTTTTAGTTGAGGGTGACAGCTGGGGGAAATTGCAGTTT	TRAV12-2	0	TRAJ24	TRAV12	TRAJ24	CAFLVEGDSWGKLQF	TGTGCCTTTTTAGTTGAGGGTGACAGCTGGGGGAAATTGCAGTTT	:::::::::0:-7:6:::::20:-7:45:::	CD8
727	TGTGCTGGCCATGGCTCTAGCAACACAGGCAAACTAATCTTT	TRAV21	0	TRAJ37	TRAV21	TRAJ37	CAGHGSSNTGKLIF	TGTGCTGGCCATGGCTCTAGCAACACAGGCAAACTAATCTTT	:::::::::0:-5:7:::::7:4:42:::	CD4
728	TGTGCCGTGACGGGAACCTACAAATACATCTTT	TRAV12-2	0	TRAJ40	TRAV12	TRAJ40	CAVTGTYKYIF	TGTGCCGTGACGGGAACCTACAAATACATCTTT	:::::::::0:-3:10:::::12:-9:33:::	CD8
729	TGTGCAGGATGTATGGAATATGGAAACAAACTGGTCTTT	TRAV25	0	TRAJ47	TRAV25	TRAJ47	CAGCMEYGNKLVF	TGTGCAGGATGTATGGAATATGGAAACAAACTGGTCTTT	:::::::::0:-1:8:::::12:1:39:::	CD8
730	TGTGCCGTGAACCGGGACACCGACAAGCTCATCTTT	TRAV12-2	0	TRAJ34	TRAV12	TRAJ34	CAVNRDTDKLIF	TGTGCCGTGAACCGGGACACCGACAAGCTCATCTTT	:::::::::0:-1:12:::::16:-7:36:::	CD8
731	TGTGCCGTGATCGTAAATACTGGAGGCTTCAAAACTATCTTT	TRAV12-2	0	TRAJ9	TRAV12	TRAJ9	CAVIVNTGGFKTIF	TGTGCCGTGATCGTAAATACTGGAGGCTTCAAAACTATCTTT	:::::::::0:-3:10:::::11:1:42:::	CD4
732	TGTGCCCCCTCGGGTCAGAATTTTGTCTTT	TRAV12-2	0	TRAJ26	TRAV12	TRAJ26	CAPSGQNFVF	TGTGCCCCCTCGGGTCAGAATTTTGTCTTT	:::::::::0:-7:6:::::12:-11:30:::	CD8
733	TGTGCAGACCAGACCCTACTGGAGGCTTCAAAACTATCTTT	TRAV13-2	0	TRAJ9	TRAV13	TRAJ9	CADQTLL_GFKTIF	TGTGCAGACCAGACCCTACTGGAGGCTTCAAAACTATCTTT	:::::::::0:-5:8:::::16:-5:41:::	CD8
734	TGTGCCGTATGCGATGACAAGATCATCTTT	TRAV12-2	0	TRAJ30	TRAV12	TRAJ30	CAVCDDKIIF	TGTGCCGTATGCGATGACAAGATCATCTTT	:::::::::0:-5:8:::::12:-8:30:::	CD8
735	TGTGCAGGAGAATGGCAGAATAACAATGACATGCGCTTT	TRAV27	0	TRAJ43	TRAV27	TRAJ43	CAGEWQNNNDMRF	TGTGCAGGAGAATGGCAGAATAACAATGACATGCGCTTT	:::::::::0:0:10:::::18:-2:39:::	CD8
736	TGTGCTTTCATGAAGCAGTATACTGGAGCCAATAGTAAGCTGACATTT	TRAV38-1	0	TRAJ56	TRAV38	TRAJ56	CAFMKQYTGANSKLTF	TGTGCTTTCATGAAGCAGTATACTGGAGCCAATAGTAAGCTGACATTT	:::::::::0:0:17:::::18:-1:48:::	CD4
737	TGTGCTTTCATGAAGCAGGTTGACACAGGCAAACTAATCTTT	TRAV38-1	0	TRAJ37	TRAV38	TRAJ37	CAFMKQVDTGKLIF	TGTGCTTTCATGAAGCAGGTTGACACAGGCAAACTAATCTTT	:::::::::0:0:17:::::22:-11:42:::	CD8
738	TGTGCTGTGTATCAGGGAGGAAAGCTTATCTTC	TRAV21	0	TRAJ23	TRAV21	TRAJ23	CAVYQGGKLIF	TGTGCTGTGTATCAGGGAGGAAAGCTTATCTTC	:::::::::0:-3:9:::::12:-11:33:::	CD4
739	TGTGCTACGCTCAGAGATGACAAGATCATCTTT	TRAV17	0	TRAJ30	TRAV17	TRAJ30	CATLRDDKIIF	TGTGCTACGCTCAGAGATGACAAGATCATCTTT	:::::::::0:-4:9:::::11:-4:33:::	CD8
740	TGTGTGGCCAGCAGCTATCAGTTAATCTGG	TRAV12-1	0	TRAJ33	TRAV12	TRAJ33	CVASSYQLIW	TGTGTGGCCAGCAGCTATCAGTTAATCTGG	:::::::::0:-6:7:::::9:-5:30:::	CD8
741	TGTGCCGTGACCTCGCGCAGCGGGAGCAACACAGGCAAACTAATCTTT	TRAV12-2	0	TRAJ37	TRAV12	TRAJ37	CAVTSRSGSNTGKLIF	TGTGCCGTGACCTCGCGCAGCGGGAGCAACACAGGCAAACTAATCTTT	:::::::::0:-3:10:::::25:-8:48:::	CD4
742	TGTGCTGTGAACGAAGGTGACAGCTGGGGGAAATTGCAGTTT	TRAV1-2	0	TRAJ24	TRAV1	TRAJ24	CAVNEGDSWGKLQF	TGTGCTGTGAACGAAGGTGACAGCTGGGGGAAATTGCAGTTT	:::::::::0:-4:10:::::17:-7:42:::	CD4
743	TGTGCAGAGATCTCATCAGGAGGAAGCTACATACCTACATTT	TRAV5	0	TRAJ6	TRAV5	TRAJ6	CAEISSGGSYIPTF	TGTGCAGAGATCTCATCAGGAGGAAGCTACATACCTACATTT	:::::::::0:-3:10:::::13:-2:42:::	CD8
744	TGTGCTGTGGGTGCGGACGACATGCGCTTT	TRAV8-3	0	TRAJ43	TRAV8	TRAJ43	CAVGADDMRF	TGTGCTGTGGGTGCGGACGACATGCGCTTT	:::::::::0:0:14:::::18:-11:30:::	CD8
745	TGTGCTACGGCCCTAAACCAGGCAGGAACTGCTCTGATCTTT	TRAV17	0	TRAJ15	TRAV17	TRAJ15	CATALNQAGTALIF	TGTGCTACGGCCCTAAACCAGGCAGGAACTGCTCTGATCTTT	:::::::::0:-3:10:::::15:-2:42:::	CD8
746	TGTGCTTATAGGAGCGGCTCTAGTGGTGGTACTAGCTATGGAAAGCTGACATTT	TRAV38-2DV8	0	TRAJ52	TRAV38	TRAJ52	CAYRSGSSGGTSYGKLTF	TGTGCTTATAGGAGCGGCTCTAGTGGTGGTACTAGCTATGGAAAGCTGACATTT	:::::::::0:0:16:::::23:-7:54:::	0
747	TGTGCCGGGGGGGATGACAAGATCATCTTT	TRAV12-2	0	TRAJ30	TRAV12	TRAJ30	CAGGDDKIIF	TGTGCCGGGGGGGATGACAAGATCATCTTT	:::::::::0:-6:7:::::12:-8:30:::	CD8
748	TGTGCAGCCTTTCCTATGGATAGCAACTATCAGTTAATCTGG	TRAV29DV5	0	TRAJ33	TRAV29	TRAJ33	CAAFPMDSNYQLIW	TGTGCAGCCTTTCCTATGGATAGCAACTATCAGTTAATCTGG	:::::::::0:-5:8:::::8:7:42:::	CD8
749	TGTGCCGTTACACTATATGGAAACAAACTGGTCTTT	TRAV12-2	0	TRAJ47	TRAV12	TRAJ47	CAVTLYGNKLVF	TGTGCCGTTACACTATATGGAAACAAACTGGTCTTT	:::::::::0:-5:8:::::14:-4:36:::	CD8
750	TGTGCCGTTGTCCGGAATAACAATGACATGCGCTTT	TRAV12-2	0	TRAJ43	TRAV12	TRAJ43	CAVVRNNNDMRF	TGTGCCGTTGTCCGGAATAACAATGACATGCGCTTT	:::::::::0:-5:8:::::15:-2:36:::	CD8
751	TGTGCCGTGAGCGCAGGCAAATCAACCTTT	TRAV12-2	0	TRAJ27	TRAV12	TRAJ27	CAVSAGKSTF	TGTGCCGTGAGCGCAGGCAAATCAACCTTT	:::::::::0:-3:10:::::12:-10:30:::	CD8
752	TGTGCAGGGCGGGACTATGGTGGTGCTACAAACAAGCTCATCTTT	TRAV25	0	TRAJ32	TRAV25	TRAJ32	CAGRDYGGATNKLIF	TGTGCAGGGCGGGACTATGGTGGTGCTACAAACAAGCTCATCTTT	:::::::::0:0:9:::::15:-5:45:::	CD8
753	TGTGCCCTGGGCGATGACAAGATCATCTTT	TRAV12-2	0	TRAJ30	TRAV12	TRAJ30	CALGDDKIIF	TGTGCCCTGGGCGATGACAAGATCATCTTT	:::::::::0:-4:9:::::12:-8:30:::	CD8
754	TGTGCCGCCGATAATGCAGGCAACATGCTCACCTTT	TRAV12-2	0	TRAJ39	TRAV12	TRAJ39	CAADNAGNMLTF	TGTGCCGCCGATAATGCAGGCAACATGCTCACCTTT	:::::::::0:-6:7:::::10:-6:36:::	CD8
755	TGTGCTGTGCCAGTTCAGGGAGCCCAGAAGCTGGTATTT	TRAV20	0	TRAJ54	TRAV20	TRAJ54	CAVPVQGAQKLVF	TGTGCTGTGCCAGTTCAGGGAGCCCAGAAGCTGGTATTT	:::::::::0:-3:10:::::13:-3:39:::	CD4
756	TGTGTGGTACCGACCTCAGGAACCTACAAATACATCTTT	TRAV12-1	0	TRAJ40	TRAV12	TRAJ40	CVVPTSGTYKYIF	TGTGTGGTACCGACCTCAGGAACCTACAAATACATCTTT	:::::::::0:-5:8:::::12:-3:39:::	CD4
757	TGTGCTGTGAGCTTCAATGCAGGCAAATCAACCTTT	TRAV8-4	0	TRAJ27	TRAV8	TRAJ27	CAVSFNAGKSTF	TGTGCTGTGAGCTTCAATGCAGGCAAATCAACCTTT	:::::::::0:-3:11:::::14:-6:36:::	CD8
758	TGGGTATTCCAGACTGACAGCTGGGGGAAATTGCAGTTT	TRAV17	0	TRAJ24	TRAV17	TRAJ24	WVFQTDSWGKLQF	TGGGTATTCCAGACTGACAGCTGGGGGAAATTGCAGTTT	:::::::::0:-11:2:::::12:-5:39:::	CD8
759	TGTGCTGTGGAGGGGCAGGGCGGATCTGAAAAGCTGGTCTTT	TRAV22	0	TRAJ57	TRAV22	TRAJ57	CAVEGQGGSEKLVF	TGTGCTGTGGAGGGGCAGGGCGGATCTGAAAAGCTGGTCTTT	:::::::::0:-1:12:::::15:-5:42:::	CD8
760	TGTGCTCTGAGGATGGATAGCAGCTATAAATTGATCTTC	TRAV19	0	TRAJ12	TRAV19	TRAJ12	CALRMDSSYKLIF	TGTGCTCTGAGGATGGATAGCAGCTATAAATTGATCTTC	:::::::::0:-6:11:::::10:0:39:::	CD8
761	TGTGCTGTGGACGCTGGGGGTTACCAGAAAGTTACCTTT	TRAV36DV7	0	TRAJ13	TRAV36	TRAJ13	CAVDAGGYQKVTF	TGTGCTGTGGACGCTGGGGGTTACCAGAAAGTTACCTTT	:::::::::0:-2:11:::::13:-6:39:::	CD8
762	TGTGCCCCTAGCAACTATCAGTTAATCTGG	TRAV12-2	0	TRAJ33	TRAV12	TRAJ33	CAPSNYQLIW	TGTGCCCCTAGCAACTATCAGTTAATCTGG	:::::::::0:-7:6:::::8:-4:30:::	CD8
763	TGTGCTCTTGGGGAGTACTGGAGCCAATAGTAAGCTGACATTT	TRDV1	0	TRAJ56	TRDV1	TRAJ56	CALGEYW_ANSKLTF	TGTGCTCTTGGGGAGTACTGGAGCCAATAGTAAGCTGACATTT	:::::::::0:-3:14:::::15:-3:43:::	CD8
764	TGTGCTCCCTCCTTTTAGGCTTTGGGAATGTGCTGCATTGC	TRAV16	0	TRAJ35	TRAV16	TRAJ35	CAPSF*A_GNVLHC	TGTGCTCCCTCCTTTTAGGCTTTGGGAATGTGCTGCATTGC	:::::::::0:-7:7:::::15:-2:41:::	CD8
765	TGTGCTGTGAGTGATACGACTGCAGGCAACAAGCTAACTTTT	TRAV8-6	0	TRAJ17	TRAV8	TRAJ17	CAVSDTTAGNKLTF	TGTGCTGTGAGTGATACGACTGCAGGCAACAAGCTAACTTTT	:::::::::0:0:14:::::19:-9:42:::	CD4
766	TGCATCCTGACTGGGTTTAACACCAATGCAGGCAAATCAACCTTT	TRAV26-2	0	TRAJ27	TRAV26	TRAJ27	CILTGFNTNAGKSTF	TGCATCCTGACTGGGTTTAACACCAATGCAGGCAAATCAACCTTT	:::::::::0:-5:10:::::5:15:45:::	CD8
767	TGTGCTGTCATCAGGGGAGGAAGCCAAGGAAATCTCATCTTT	TRAV41	0	TRAJ42	TRAV41	TRAJ42	CAVIRGGSQGNLIF	TGTGCTGTCATCAGGGGAGGAAGCCAAGGAAATCTCATCTTT	:::::::::0:-2:10:::::15:-8:42:::	CD8
768	TGTGCTTCTCCCCCGTCTCGTGGTACTAGCTATGGAAAGCTGACATTT	TRAV38-2DV8	0	TRAJ52	TRAV38	TRAJ52	CASPPSRGTSYGKLTF	TGTGCTTCTCCCCCGTCTCGTGGTACTAGCTATGGAAAGCTGACATTT	:::::::::0:-9:7:::::16:-6:48:::	CD8
769	TGTGCAGCAAGTAAAAGGAATAACAATGCCAGACTCATGTTT	TRAV13-1	0	TRAJ31	TRAV13	TRAJ31	CAASKRNNNARLMF	TGTGCAGCAAGTAAAAGGAATAACAATGCCAGACTCATGTTT	:::::::::0:0:13:::::16:0:42:::	CD4
770	TGTGCTCTTCAGTTCTAACGACTACAAGCTCAGCTTT	TRAV16	0	TRAJ20	TRAV16	TRAJ20	CALQF*_DYKLSF	TGTGCTCTTCAGTTCTAACGACTACAAGCTCAGCTTT	:::::::::0:-6:8:::::11:0:37:::	CD8
771	TGTGCAGGAGCAGGATCTAACGACTACAAGCTCAGCTTT	TRAV27	0	TRAJ20	TRAV27	TRAJ20	CAGAGSNDYKLSF	TGTGCAGGAGCAGGATCTAACGACTACAAGCTCAGCTTT	:::::::::0:0:10:::::15:-2:39:::	CD8
772	TGTGCAGGAGACGATGGAGGAGGAGGTGCTGACGGACTCACCTTT	TRAV27	0	TRAJ45	TRAV27	TRAJ45	CAGDDGGGGADGLTF	TGTGCAGGAGACGATGGAGGAGGAGGTGCTGACGGACTCACCTTT	:::::::::0:0:10:::::17:-7:45:::	CD8
773	TGTGCTGTGATCCTTACCAATGCAGGCAAATCAACCTTT	TRAV8-4	0	TRAJ27	TRAV8	TRAJ27	CAVILTNAGKSTF	TGTGCTGTGATCCTTACCAATGCAGGCAAATCAACCTTT	:::::::::0:-4:10:::::15:-4:39:::	CD4
774	TGTGCTGTTCCGTCTGGGGCTGGGAGTTACCAACTCACTTTC	TRAV21	0	TRAJ28	TRAV21	TRAJ28	CAVPSGAGSYQLTF	TGTGCTGTTCCGTCTGGGGCTGGGAGTTACCAACTCACTTTC	:::::::::0:-4:8:::::12:-5:42:::	CD8
775	TGTGCCGTGTCTTCTCACACCGACAAGCTCATCTTT	TRAV12-2	0	TRAJ34	TRAV12	TRAJ34	CAVSSHTDKLIF	TGTGCCGTGTCTTCTCACACCGACAAGCTCATCTTT	:::::::::0:-4:9:::::9:0:36:::	CD8
776	TGTGCTCTTGGGGGAGGACCCTATGGTCAGAATTTTGTCTTT	TRDV1	0	TRAJ26	TRDV1	TRAJ26	CALGGGPYGQNFVF	TGTGCTCTTGGGGGAGGACCCTATGGTCAGAATTTTGTCTTT	:::::::::0:-4:13:::::20:-7:42:::	CD8
777	TGTGCAGCAAGTAATAGAGGAAACACACCTCTTGTCTTT	TRAV13-1	0	TRAJ29	TRAV13	TRAJ29	CAASNRGNTPLVF	TGTGCAGCAAGTAATAGAGGAAACACACCTCTTGTCTTT	:::::::::0:0:13:::::17:-7:39:::	CD8
778	TGTGCTCTGAGTGACTCAACCGGTAACCAGTTCTATTTT	TRAV19	0	TRAJ49	TRAV19	TRAJ49	CALSDSTGNQFYF	TGTGCTCTGAGTGACTCAACCGGTAACCAGTTCTATTTT	:::::::::0:-3:14:::::18:-4:39:::	CD8
779	TGTGCCGTCTCCGGGTATGCACTCAACTTC	TRAV12-2	0	TRAJ41	TRAV12	TRAJ41	CAVSGYALNF	TGTGCCGTCTCCGGGTATGCACTCAACTTC	:::::::::0:-5:8:::::9:-10:30:::	CD8
780	TGTGCTGTGGTGAGTATGGGAGGAGGAAACAAACTCACCTTT	TRAV22	0	TRAJ10	TRAV22	TRAJ10	CAVVSMGGGNKLTF	TGTGCTGTGGTGAGTATGGGAGGAGGAAACAAACTCACCTTT	:::::::::0:-3:10:::::17:-8:42:::	CD4
781	TGTGCTGTGAGTCGTTCTGATGGCTACAATAAGCTGATTTTT	TRAV8-6	0	TRAJ4	TRAV8	TRAJ4	CAVSRSDGYNKLIF	TGTGCTGTGAGTCGTTCTGATGGCTACAATAAGCTGATTTTT	:::::::::0:-2:12:::::14:-4:42:::	CD4
782	TGTGCAGAGAATACGGGGAACACCGGTAACCAGTTCTATTTT	TRAV13-2	0	TRAJ49	TRAV13	TRAJ49	CAENTGNTGNQFYF	TGTGCAGAGAATACGGGGAACACCGGTAACCAGTTCTATTTT	:::::::::0:0:13:::::17:0:42:::	CD4
783	TGTGCCGTGAGGGGATCTGGGGGTTACCAGAAAGTTACCTTT	TRAV12-2	0	TRAJ13	TRAV12	TRAJ13	CAVRGSGGYQKVTF	TGTGCCGTGAGGGGATCTGGGGGTTACCAGAAAGTTACCTTT	:::::::::0:-3:10:::::15:-5:42:::	CD8
784	TGTGCAGGACCCCTTGGGGGTTACCAGAAAGTTACCTTT	TRAV27	0	TRAJ13	TRAV27	TRAJ13	CAGPLGGYQKVTF	TGTGCAGGACCCCTTGGGGGTTACCAGAAAGTTACCTTT	:::::::::0:-1:9:::::14:-7:39:::	CD8
785	TGTGCTGTGGATCTAACCGGCACTGCCAGTAAACTCACCTTT	TRAV22	0	TRAJ44	TRAV22	TRAJ44	CAVDLTGTASKLTF	TGTGCTGTGGATCTAACCGGCACTGCCAGTAAACTCACCTTT	:::::::::0:-2:11:::::15:-5:42:::	CD8
786	TGTGCTCATCCATCGAACACCGGTAACCAGTTCTATTTT	TRAV38-1	0	TRAJ49	TRAV38	TRAJ49	CAHPSNTGNQFYF	TGTGCTCATCCATCGAACACCGGTAACCAGTTCTATTTT	:::::::::0:-11:6:::::12:2:39:::	CD8
787	TGTGCTCCGCGCGGAGGCAACACAGGCAAACTAATCTTT	TRAV5	0	TRAJ37	TRAV5	TRAJ37	CAPRGGNTGKLIF	TGTGCTCCGCGCGGAGGCAACACAGGCAAACTAATCTTT	:::::::::0:-8:5:::::15:-7:39:::	CD4
788	TGTGCTGTGAGTGTCTTCACCGGCACTGCCAGTAAACTCACCTTT	TRAV8-4	0	TRAJ44	TRAV8	TRAJ44	CAVSVFTGTASKLTF	TGTGCTGTGAGTGTCTTCACCGGCACTGCCAGTAAACTCACCTTT	:::::::::0:-1:13:::::18:-5:45:::	CD4
789	TGTGCTGTGAGAGACAGGGGCACCGACAAGCTCATCTTT	TRAV3	0	TRAJ34	TRAV3	TRAJ34	CAVRDRGTDKLIF	TGTGCTGTGAGAGACAGGGGCACCGACAAGCTCATCTTT	:::::::::0:0:16:::::20:-8:39:::	CD8
790	TGTGCAGGCGGCACAAGAGGGCCAGGAAACACACCTCTTGTCTTT	TRAV27	0	TRAJ29	TRAV27	TRAJ29	CAGGTRGPGNTPLVF	TGTGCAGGCGGCACAAGAGGGCCAGGAAACACACCTCTTGTCTTT	:::::::::0:-2:8:::::22:-6:45:::	CD8
791	TGTGCTACGGACCCCGGGACTAGCAACACAGGCAAACTAATCTTT	TRAV17	0	TRAJ37	TRAV17	TRAJ37	CATDPGTSNTGKLIF	TGTGCTACGGACCCCGGGACTAGCAACACAGGCAAACTAATCTTT	:::::::::0:-1:12:::::19:-5:45:::	CD8
792	TGTGCTGTGAGGGAGAATGCTGGTGGTACTAGCTATGGAAAGCTGACATTT	TRAV8-4	0	TRAJ52	TRAV8	TRAJ52	CAVRENAGGTSYGKLTF	TGTGCTGTGAGGGAGAATGCTGGTGGTACTAGCTATGGAAAGCTGACATTT	:::::::::0:0:14:::::15:-2:51:::	CD4
793	TGTGCCGTGATCATAAATACTGGAGGCTTCAAAACTATCTTT	TRAV12-2	0	TRAJ9	TRAV12	TRAJ9	CAVIINTGGFKTIF	TGTGCCGTGATCATAAATACTGGAGGCTTCAAAACTATCTTT	:::::::::0:0:13:::::14:-2:42:::	CD4
794	TGTGCAGCAAGCCGATCCGGAATTCAGGAAACACACCTCTTGTCTTT	TRAV29DV5	0	TRAJ29	TRAV29	TRAJ29	CAASRSGI_GNTPLVF	TGTGCAGCAAGCCGATCCGGAATTCAGGAAACACACCTCTTGTCTTT	:::::::::0:-1:12:::::15:3:47:::	CD4
795	TGTGCAACCGCGTCATATAACACCGACAAGCTCATCTTT	TRAV12-3	0	TRAJ34	TRAV12	TRAJ34	CATASYNTDKLIF	TGTGCAACCGCGTCATATAACACCGACAAGCTCATCTTT	:::::::::0:-6:7:::::12:0:39:::	CD8
796	TGTGTGGTGATCCATGACAAGATCATCTTT	TRAV12-1	0	TRAJ30	TRAV12	TRAJ30	CVVIHDKIIF	TGTGTGGTGATCCATGACAAGATCATCTTT	:::::::::0:-3:10:::::13:-9:30:::	CD8
797	TGTGCAGGGCTCGGTTTTCGAGGATAGCAACTATCAGTTAATCTGG	TRAV27	0	TRAJ33	TRAV27	TRAJ33	CAGLGFRG_SNYQLIW	TGTGCAGGGCTCGGTTTTCGAGGATAGCAACTATCAGTTAATCTGG	:::::::::0:-2:8:::::21:-1:46:::	CD8
798	TGTGTGGTGGGGAGGGATCAGATCATCTTT	TRAV12-1	0	TRAJ30	TRAV12	TRAJ30	CVVGRDQIIF	TGTGTGGTGGGGAGGGATCAGATCATCTTT	:::::::::0:-4:9:::::19:-15:30:::	CD8
799	TGTGCCTTTACGACTGACAGCTGGGGGAAATTGCAGTTT	TRAV24	0	TRAJ24	TRAV24	TRAJ24	CAFTTDSWGKLQF	TGTGCCTTTACGACTGACAGCTGGGGGAAATTGCAGTTT	:::::::::0:0:10:::::9:-2:39:::	CD8
800	TGTGCCACACTGAGGGAGGGTGGTACTAGCTATGGAAAGCTGACATTT	TRAV36DV7	0	TRAJ52	TRAV36	TRAJ52	CATLREGGTSYGKLTF	TGTGCCACACTGAGGGAGGGTGGTACTAGCTATGGAAAGCTGACATTT	:::::::::0:-8:5:::::18:-8:48:::	CD4
801	TGTGCAGCAAGTGAAGGTGCAGGCAACATGCTCACCTTT	TRAV13-1	0	TRAJ39	TRAV13	TRAJ39	CAASEGAGNMLTF	TGTGCAGCAAGTGAAGGTGCAGGCAACATGCTCACCTTT	:::::::::0:-1:12:::::17:-10:39:::	CD8
802	TGTGTTGTGAGTCTGTAAACCCATACCGGCACTGCCAGTAAACTCACCTTT	TRAV8-2	0	TRAJ44	TRAV8	TRAJ44	CVVSL*THTGTASKLTF	TGTGTTGTGAGTCTGTAAACCCATACCGGCACTGCCAGTAAACTCACCTTT	:::::::::0:-2:12:::::22:-3:51:::	0
803	TGTGTGGTGACCGCAGGATACAGCACCCTCACCTTT	TRAV12-1	0	TRAJ11	TRAV12	TRAJ11	CVVTAGYSTLTF	TGTGTGGTGACCGCAGGATACAGCACCCTCACCTTT	:::::::::0:-3:10:::::13:-6:36:::	CD8
804	TGTGCTACTCGTCAGTATTCAGGAGGAGGTGCTGACGGACTCACCTTT	TRAV21	0	TRAJ45	TRAV21	TRAJ45	CATRQYSGGGADGLTF	TGTGCTACTCGTCAGTATTCAGGAGGAGGTGCTGACGGACTCACCTTT	:::::::::0:-6:6:::::14:-1:48:::	CD8
805	TGTGCAGAGAAGGCTAAGCGACTCACGGGAGGAGGAAACAAACTCACCTTT	TRAV13-2	0	TRAJ10	TRAV13	TRAJ10	CAEKAKRLTGGGNKLTF	TGTGCAGAGAAGGCTAAGCGACTCACGGGAGGAGGAAACAAACTCACCTTT	:::::::::0:-2:11:::::20:-2:51:::	CD4
806	TGTGCCTTCCCTTTTTATAACCAGGGAGGAAAGCTTATCTTC	TRAV24	0	TRAJ23	TRAV24	TRAJ23	CAFPFYNQGGKLIF	TGTGCCTTCCCTTTTTATAACCAGGGAGGAAAGCTTATCTTC	:::::::::0:-2:8:::::13:-3:42:::	CD4
807	TGTGCCGTTGTAACAGGCTTTCAGAAACTTGTATTT	TRAV12-2	0	TRAJ8	TRAV12	TRAJ8	CAVVTGFQKLVF	TGTGCCGTTGTAACAGGCTTTCAGAAACTTGTATTT	:::::::::0:0:15:::::12:-5:36:::	CD4
808	TGTGCAGCAAGCGGAGTTGGGTCTAGCAACACAGGCAAACTAATCTTT	TRAV29DV5	0	TRAJ37	TRAV29	TRAJ37	CAASGVGSSNTGKLIF	TGTGCAGCAAGCGGAGTTGGGTCTAGCAACACAGGCAAACTAATCTTT	:::::::::0:0:13:::::17:0:48:::	CD4
809	TGTGCTGTGAGAGATGGGGGGCCCCCATACTCTGGGGCTGGGAGTTACCAACTCACTTTC	TRAV1-2	0	TRAJ28	TRAV1	TRAJ28	CAVRDGGPPYSGAGSYQLTF	TGTGCTGTGAGAGATGGGGGGCCCCCATACTCTGGGGCTGGGAGTTACCAACTCACTTTC	:::::::::0:0:14:::::25:0:60:::	CD8
810	TGTGCAGCAAGCCCGAAGGGCATATCTAACTTTGGAAATGAGAAATTAACCTTT	TRAV13-1	0	TRAJ48	TRAV13	TRAJ48	CAASPKGISNFGNEKLTF	TGTGCAGCAAGCCCGAAGGGCATATCTAACTTTGGAAATGAGAAATTAACCTTT	:::::::::0:-2:11:::::21:1:54:::	CD4
811	TGTGCAGCAAGACCTTATAACACCGACAAGCTCATCTTT	TRAV29DV5	0	TRAJ34	TRAV29	TRAJ34	CAARPYNTDKLIF	TGTGCAGCAAGACCTTATAACACCGACAAGCTCATCTTT	:::::::::0:-2:11:::::8:4:39:::	CD8
812	TGTGTGGTTGCTGACTACAAGCTCAGCTTT	TRAV12-1	0	TRAJ20	TRAV12	TRAJ20	CVVADYKLSF	TGTGTGGTTGCTGACTACAAGCTCAGCTTT	:::::::::0:-5:8:::::12:-8:30:::	CD8
813	TGTGCCCACGCCACAGGCAAACTAATCTTT	TRAV13-2	0	TRAJ37	TRAV13	TRAJ37	CAHATGKLIF	TGTGCCCACGCCACAGGCAAACTAATCTTT	:::::::::0:-8:5:::::11:-12:30:::	CD8
814	TGTGCTGTGAGTGATCGCAGTGGAGGTAGCAACTATAAACTGACATTT	TRAV8-4	0	TRAJ53	TRAV8	TRAJ53	CAVSDRSGGSNYKLTF	TGTGCTGTGAGTGATCGCAGTGGAGGTAGCAACTATAAACTGACATTT	:::::::::0:0:14:::::18:-5:48:::	CD4
815	TGTGCCGTGATAGAAGCCAGACTCATGTTT	TRAV12-2	0	TRAJ31	TRAV12	TRAJ31	CAVIEARLMF	TGTGCCGTGATAGAAGCCAGACTCATGTTT	:::::::::0:-3:10:::::15:-11:30:::	CD8
816	TGTGCTGTGAGTGAGAAGGGCTCTAGCAACACAGGCAAACTAATCTTT	TRAV8-4	0	TRAJ37	TRAV8	TRAJ37	CAVSEKGSSNTGKLIF	TGTGCTGTGAGTGAGAAGGGCTCTAGCAACACAGGCAAACTAATCTTT	:::::::::0:0:14:::::18:-1:48:::	CD4
817	TGCATCCTTTCAGGAGGAGGTGCTGACGGACTCACCTTT	TRAV26-2	0	TRAJ45	TRAV26	TRAJ45	CILSGGGADGLTF	TGCATCCTTTCAGGAGGAGGTGCTGACGGACTCACCTTT	:::::::::0:-7:8:::::8:-4:39:::	CD8
818	TGCCTCGTGGGTGAAAGAGGCTGGGGGAAATTGCAGTTT	TRAV4	0	TRAJ24	TRAV4	TRAJ24	CLVGERGWGKLQF	TGCCTCGTGGGTGAAAGAGGCTGGGGGAAATTGCAGTTT	:::::::::0:-2:14:::::19:-12:39:::	CD8
819	TGTGCAGAGCGATCTTATAACACCGACAAGCTCATCTTT	TRAV13-2	0	TRAJ34	TRAV13	TRAJ34	CAERSYNTDKLIF	TGTGCAGAGCGATCTTATAACACCGACAAGCTCATCTTT	:::::::::0:-4:9:::::10:2:39:::	CD8
820	TGTGCTTTCATGAAGCATAAGTTAGGCCGCCGGCACTGCCAGTAAACTCACCTTT	TRAV38-1	0	TRAJ44	TRAV38	TRAJ44	CAFMKHKLG_AGTASKLTF	TGTGCTTTCATGAAGCATAAGTTAGGCCGCCGGCACTGCCAGTAAACTCACCTTT	:::::::::0:0:17:::::29:-6:55:::	CD8
821	TGTGCCGTGAACGGGGAGACTGACAGCTGGGGGAAATTGCAGTTT	TRAV12-2	0	TRAJ24	TRAV12	TRAJ24	CAVNGETDSWGKLQF	TGTGCCGTGAACGGGGAGACTGACAGCTGGGGGAAATTGCAGTTT	:::::::::0:-1:12:::::18:-5:45:::	CD8
822	TGTGCAGCCGCTACCGGTAACCAGTTCTATTTT	TRAV29DV5	0	TRAJ49	TRAV29	TRAJ49	CAAATGNQFYF	TGTGCAGCCGCTACCGGTAACCAGTTCTATTTT	:::::::::0:-5:8:::::12:-4:33:::	CD8
823	TGTGCTTCTAAAACCGGTAACCAGTTCTATTTT	TRAV8-4	0	TRAJ49	TRAV8	TRAJ49	CASKTGNQFYF	TGTGCTTCTAAAACCGGTAACCAGTTCTATTTT	:::::::::0:-8:6:::::1:6:33:::	CD8
824	TGTGTGGTGGGAGGCGACTACAAGCTCAGCTTT	TRAV12-1	0	TRAJ20	TRAV12	TRAJ20	CVVGGDYKLSF	TGTGTGGTGGGAGGCGACTACAAGCTCAGCTTT	:::::::::0:-4:9:::::14:-7:33:::	CD8
825	TGTGCTGTGAGAGACCGGCGTAACCAGGGAGGAAAGCTTATCTTC	TRAV3	0	TRAJ23	TRAV3	TRAJ23	CAVRDRRNQGGKLIF	TGTGCTGTGAGAGACCGGCGTAACCAGGGAGGAAAGCTTATCTTC	:::::::::0:-1:15:::::20:-7:45:::	CD4
826	TGCATCAGGGGTACCTCAGGAACCTACAAATACATCTTT	TRAV26-2	0	TRAJ40	TRAV26	TRAJ40	CIRGTSGTYKYIF	TGCATCAGGGGTACCTCAGGAACCTACAAATACATCTTT	:::::::::0:-9:6:::::11:-2:39:::	CD8
827	TGTGCATCCCCCGGCCGAGGAAGCCAAGGAAATCTCATCTTT	TRAV27	0	TRAJ42	TRAV27	TRAJ42	CASPGRGSQGNLIF	TGTGCATCCCCCGGCCGAGGAAGCCAAGGAAATCTCATCTTT	:::::::::0:-4:6:::::16:-9:42:::	CD8
828	TGTGCTGCTCCCTTTTCTGGTGGCTACAATAAGCTGATTTTT	TRAV3	0	TRAJ4	TRAV3	TRAJ4	CAAPFSGGYNKLIF	TGTGCTGCTCCCTTTTCTGGTGGCTACAATAAGCTGATTTTT	:::::::::0:-9:7:::::12:-2:42:::	CD4
829	TGTGCTACGGACTCGATCTATAACACCGACAAGCTCATCTTT	TRAV17	0	TRAJ34	TRAV17	TRAJ34	CATDSIYNTDKLIF	TGTGCTACGGACTCGATCTATAACACCGACAAGCTCATCTTT	:::::::::0:-1:12:::::14:2:42:::	CD8
830	TGTGCCGTGAACTCTGATGGTCAGAATTTTGTCTTT	TRAV12-2	0	TRAJ26	TRAV12	TRAJ26	CAVNSDGQNFVF	TGTGCCGTGAACTCTGATGGTCAGAATTTTGTCTTT	:::::::::0:-1:12:::::16:-9:36:::	CD8
831	TGTGCCGTGAACAATGACAAGATCATCTTT	TRAV12-2	0	TRAJ30	TRAV12	TRAJ30	CAVNNDKIIF	TGTGCCGTGAACAATGACAAGATCATCTTT	:::::::::0:0:13:::::13:-9:30:::	CD8
832	TGTGCTGTGCTGAATAGCAACTATCAGTTAATCTGG	TRAV20	0	TRAJ33	TRAV20	TRAJ33	CAVLNSNYQLIW	TGTGCTGTGCTGAATAGCAACTATCAGTTAATCTGG	:::::::::0:-3:10:::::10:0:36:::	CD4
833	TGGAGCTATGGTCAGAATTTTGTCTTT	TRAV27	0	TRAJ26	TRAV27	TRAJ26	WSYGQNFVF	TGGAGCTATGGTCAGAATTTTGTCTTT	:::::::::0:-8:2:::::5:-7:27:::	CD4
834	TGTGCAATGAGAGAGGGAAGGATGGAATATGGAAACAAACTGGTCTTT	TRAV14DV4	0	TRAJ47	TRAV14	TRAJ47	CAMREGRMEYGNKLVF	TGTGCAATGAGAGAGGGAAGGATGGAATATGGAAACAAACTGGTCTTT	:::::::::0:0:17:::::21:1:48:::	CD8
835	TGTGCTGTGAAAGGCGGTAACCAGTTCTATTTT	TRAV8-4	0	TRAJ49	TRAV8	TRAJ49	CAVKGGNQFYF	TGTGCTGTGAAAGGCGGTAACCAGTTCTATTTT	:::::::::0:-4:10:::::14:-6:33:::	CD8
836	TGTGCTTATAGGAGCGCGTTTAACACCGGTAACCAGTTCTATTTT	TRAV38-2DV8	0	TRAJ49	TRAV38	TRAJ49	CAYRSAFNTGNQFYF	TGTGCTTATAGGAGCGCGTTTAACACCGGTAACCAGTTCTATTTT	:::::::::0:0:16:::::21:-1:45:::	CD4
837	TGTGCCGGGGACAGCAGTGCTTCCAAGATAATCTTT	TRAV12-2	0	TRAJ3	TRAV12	TRAJ3	CAGDSSASKIIF	TGTGCCGGGGACAGCAGTGCTTCCAAGATAATCTTT	:::::::::0:0:13:::::4:2:36:::	CD8
838	TGTGCCGTGAACATAACACCGACAAGCTCATCTTT	TRAV12-2	0	TRAJ34	TRAV12	TRAJ34	CAVNIT_DKLIF	TGTGCCGTGAACATAACACCGACAAGCTCATCTTT	:::::::::0:0:13:::::12:-4:35:::	CD8
839	TGTGCAGCATCTTTTCGGTTCTGCAAGGCAACTGACCTTT	TRAV13-1	0	TRAJ22	TRAV13	TRAJ22	CAASFRF_ARQLTF	TGTGCAGCATCTTTTCGGTTCTGCAAGGCAACTGACCTTT	:::::::::0:-4:9:::::9:-2:40:::	CD8
840	TGTGCTTTCATGAAGCCCGCAACTGACAGCTGGGGGAAATTGCAGTTT	TRAV38-1	0	TRAJ24	TRAV38	TRAJ24	CAFMKPATDSWGKLQF	TGTGCTTTCATGAAGCCCGCAACTGACAGCTGGGGGAAATTGCAGTTT	:::::::::0:-1:16:::::19:-3:48:::	CD4
841	TGTGCAGCAAAGGAGGGTCTAGCAACACAGGCAAACTAATCTTT	TRAV23DV6	0	TRAJ37	TRAV23	TRAJ37	CAAKEGL_NTGKLIF	TGTGCAGCAAAGGAGGGTCTAGCAACACAGGCAAACTAATCTTT	:::::::::0:-3:10:::::14:-1:44:::	CD8
842	TGTGCAGGAGCTGAGGTAATGGATGCCAGACTCATGTTT	TRAV27	0	TRAJ31	TRAV27	TRAJ31	CAGAEVMDARLMF	TGTGCAGGAGCTGAGGTAATGGATGCCAGACTCATGTTT	:::::::::0:0:10:::::22:-9:39:::	CD8
843	TGTGCTGTTTTTCTGGTTCTGCAAGGCAACTGACCTTT	TRAV22	0	TRAJ22	TRAV22	TRAJ22	CAVFLV_ARQLTF	TGTGCTGTTTTTCTGGTTCTGCAAGGCAACTGACCTTT	:::::::::0:-5:8:::::7:0:38:::	CD8
844	TGTGTGGTGAACACTGGGGCAAACAACCTCTTCTTT	TRAV12-1	0	TRAJ36	TRAV12	TRAJ36	CVVNTGANNLFF	TGTGTGGTGAACACTGGGGCAAACAACCTCTTCTTT	:::::::::0:0:13:::::12:-4:36:::	CD8
845	TGTGCCGTGAACAGTAACCAGTTCTATTTT	TRAV12-2	0	TRAJ49	TRAV12	TRAJ49	CAVNSNQFYF	TGTGCCGTGAACAGTAACCAGTTCTATTTT	:::::::::0:0:13:::::13:-8:30:::	CD8
846	TGTGCCGTGAACAAGGCAACTGACAGCTGGGGGAAATTGCAGTTT	TRAV12-2	0	TRAJ24	TRAV12	TRAJ24	CAVNKATDSWGKLQF	TGTGCCGTGAACAAGGCAACTGACAGCTGGGGGAAATTGCAGTTT	:::::::::0:0:13:::::16:-3:45:::	CD8
847	TGTGCTGTGAGAGCACGGTACAATAACAATGACATGCGCTTT	TRAV3	0	TRAJ43	TRAV3	TRAJ43	CAVRARYNNNDMRF	TGTGCTGTGAGAGCACGGTACAATAACAATGACATGCGCTTT	:::::::::0:-3:13:::::17:2:42:::	CD8
848	TGTGTTGTAGGCAGAGGCTCAACCCTGGGGAGGCTATACTTT	TRAV8-2	0	TRAJ18	TRAV8	TRAJ18	CVVGRGSTLGRLYF	TGTGTTGTAGGCAGAGGCTCAACCCTGGGGAGGCTATACTTT	:::::::::0:-6:8:::::11:-4:42:::	CD4
849	TGTGCAGAGAAACGGGAATGCAGGCAACATGCTCACCTTT	TRAV5	0	TRAJ39	TRAV5	TRAJ39	CAEKREC_GNMLTF	TGTGCAGAGAAACGGGAATGCAGGCAACATGCTCACCTTT	:::::::::0:-3:10:::::16:-8:40:::	CD8
850	TGTGCAGCAAGCAACGGCGCCTCAGGAACCTACAAATACATCTTT	TRAV23DV6	0	TRAJ40	TRAV23	TRAJ40	CAASNGASGTYKYIF	TGTGCAGCAAGCAACGGCGCCTCAGGAACCTACAAATACATCTTT	:::::::::0:0:13:::::19:-4:45:::	CD4
851	TGTGCTGTGCCCGGAACAATGCCAGACTCATGTTT	TRAV21	0	TRAJ31	TRAV21	TRAJ31	CAVPGT_ARLMF	TGTGCTGTGCCCGGAACAATGCCAGACTCATGTTT	:::::::::0:-3:9:::::14:-5:35:::	CD8
852	TGTGCAGCAAGCCGAAATTAACCTTT	TRAV23DV6	0	TRAJ48	TRAV23	TRAJ48	CAAS_KLTF	TGTGCAGCAAGCCGAAATTAACCTTT	:::::::::0:-1:12:::::13:-19:26:::	CD8
853	TGTGCCGTGTCCGATGACAAGATCATCTTT	TRAV12-2	0	TRAJ30	TRAV12	TRAJ30	CAVSDDKIIF	TGTGCCGTGTCCGATGACAAGATCATCTTT	:::::::::0:-4:9:::::12:-8:30:::	CD8
854	TGTGCTTATAGGAGCAGGGATTATGGAGGAAGCCAAGGAAATCTCATCTTT	TRAV38-2DV8	0	TRAJ42	TRAV38	TRAJ42	CAYRSRDYGGSQGNLIF	TGTGCTTATAGGAGCAGGGATTATGGAGGAAGCCAAGGAAATCTCATCTTT	:::::::::0:-1:15:::::19:-3:51:::	CD4
855	TGTGCTCTGAGTGAGGGAGCCCAGAAGCTGGTATTT	TRAV9-2	0	TRAJ54	TRAV9	TRAJ54	CALSEGAQKLVF	TGTGCTCTGAGTGAGGGAGCCCAGAAGCTGGTATTT	:::::::::0:0:14:::::13:-6:36:::	CD4
856	TGTGCTACGGACGAAAGGGCAGGAACTGCTCTGATCTTT	TRAV17	0	TRAJ15	TRAV17	TRAJ15	CATDERAGTALIF	TGTGCTACGGACGAAAGGGCAGGAACTGCTCTGATCTTT	:::::::::0:0:13:::::17:-7:39:::	CD8
857	TGTGCCTGTCAGTAACCAGGCAGGAACTGCTCTGATCTTT	TRAV12-3	0	TRAJ15	TRAV12	TRAJ15	CACQ*PG_GTALIF	TGTGCCTGTCAGTAACCAGGCAGGAACTGCTCTGATCTTT	:::::::::0:-8:5:::::13:-2:40:::	CD8
858	TGTGCCGTGGAAGCAGGCAAACTAATCTTT	TRAV12-2	0	TRAJ37	TRAV12	TRAJ37	CAVEAGKLIF	TGTGCCGTGGAAGCAGGCAAACTAATCTTT	:::::::::0:-4:9:::::13:-14:30:::	CD8
859	TGTGTGGTGACACCCCTTCAGGATACAGCACCCTCACCTTT	TRAV12-1	0	TRAJ11	TRAV12	TRAJ11	CVVTPLQ_YSTLTF	TGTGTGGTGACACCCCTTCAGGATACAGCACCCTCACCTTT	:::::::::0:-3:10:::::16:-4:41:::	CD8
860	TGTGTGGTGACGGGCAGTGACATGCGCTTT	TRAV12-1	0	TRAJ43	TRAV12	TRAJ43	CVVTGSDMRF	TGTGTGGTGACGGGCAGTGACATGCGCTTT	:::::::::0:-3:10:::::14:-7:30:::	CD8
861	TGTGCAGCAAGCCCGACGGGGGGTCATCTTT	TRAV13-1	0	TRAJ30	TRAV13	TRAJ30	CAASP_RGVIF	TGTGCAGCAAGCCCGACGGGGGGTCATCTTT	:::::::::0:-2:11:::::23:-18:31:::	CD8
862	TGTGCCCTCTCGAACGACAAGCTCATCTTT	TRAV12-2	0	TRAJ34	TRAV12	TRAJ34	CALSNDKLIF	TGTGCCCTCTCGAACGACAAGCTCATCTTT	:::::::::0:-7:6:::::14:-11:30:::	CD8
863	TGTGCTGTCATTTGGAACACCGGTAACCAGTTCTATTTT	TRAV41	0	TRAJ49	TRAV41	TRAJ49	CAVIWNTGNQFYF	TGTGCTGTCATTTGGAACACCGGTAACCAGTTCTATTTT	:::::::::0:-2:10:::::11:3:39:::	CD8
864	TGTGCAGCAGGACTCACCCTCCAGGGCGGATCTGAAAAGCTGGTCTTT	TRAV23DV6	0	TRAJ57	TRAV23	TRAJ57	CAAGLTLQGGSEKLVF	TGTGCAGCAGGACTCACCCTCCAGGGCGGATCTGAAAAGCTGGTCTTT	:::::::::0:-4:9:::::21:-5:48:::	CD8
865	TGCCTCGTAAGCGGATCAGGATACAGCACCCTCACCTTT	TRAV4	0	TRAJ11	TRAV4	TRAJ11	CLVSGSGYSTLTF	TGCCTCGTAAGCGGATCAGGATACAGCACCCTCACCTTT	:::::::::0:-8:8:::::15:-5:39:::	CD8
866	TGTGCCGTCTCGGGGAGTAAACTCACCTTT	TRAV12-2	0	TRAJ44	TRAV12	TRAJ44	CAVSGSKLTF	TGTGCCGTCTCGGGGAGTAAACTCACCTTT	:::::::::0:-5:8:::::15:-17:30:::	CD8
867	TGTGCTCTTCTTTCTGGTGGCTACAATAAGCTGATTTTT	TRAV2	0	TRAJ4	TRAV2	TRAJ4	CALLSGGYNKLIF	TGTGCTCTTCTTTCTGGTGGCTACAATAAGCTGATTTTT	:::::::::0:-8:6:::::10:-3:39:::	CD4
868	TGTGCCGTGAACGCGGATGGCCAGAAGCTGCTCTTT	TRAV12-2	0	TRAJ16	TRAV12	TRAJ16	CAVNADGQKLLF	TGTGCCGTGAACGCGGATGGCCAGAAGCTGCTCTTT	:::::::::0:-1:12:::::15:-8:36:::	CD8
869	TGTGCAGCATCGTGGGATGGAGGAAGCCAAGGAAATCTCATCTTT	TRAV29DV5	0	TRAJ42	TRAV29	TRAJ42	CAASWDGGSQGNLIF	TGTGCAGCATCGTGGGATGGAGGAAGCCAAGGAAATCTCATCTTT	:::::::::0:-4:9:::::16:-6:45:::	CD8
870	TGTGCCGTGAACAACGGGGATAGCAGCTATAAATTGATCTTC	TRAV12-2	0	TRAJ12	TRAV12	TRAJ12	CAVNNGDSSYKLIF	TGTGCCGTGAACAACGGGGATAGCAGCTATAAATTGATCTTC	:::::::::0:0:13:::::17:-4:42:::	CD4
871	TGTGCCGTGACGGGGGAAACTGACAGCTGGGGGAAATTGCAGTTT	TRAV12-2	0	TRAJ24	TRAV12	TRAJ24	CAVTGETDSWGKLQF	TGTGCCGTGACGGGGGAAACTGACAGCTGGGGGAAATTGCAGTTT	:::::::::0:-3:10:::::17:-4:45:::	CD8
872	TGTGCTGTGACCAGGATGGATAGCAGCTATAAATTGATCTTC	TRAV8-6	0	TRAJ12	TRAV8	TRAJ12	CAVTRMDSSYKLIF	TGTGCTGTGACCAGGATGGATAGCAGCTATAAATTGATCTTC	:::::::::0:-4:10:::::13:0:42:::	CD4
873	TGTGCTGTGGTTGACCGTAACGACTACAAGCTCAGCTTT	TRAV22	0	TRAJ20	TRAV22	TRAJ20	CAVVDRNDYKLSF	TGTGCTGTGGTTGACCGTAACGACTACAAGCTCAGCTTT	:::::::::0:-3:10:::::17:-4:39:::	CD8
874	TGCATCGTCAGAGTCGAAGTGCAGGCAACATGCTCACCTTT	TRAV26-1	0	TRAJ39	TRAV26	TRAJ39	CIVRVEV_GNMLTF	TGCATCGTCAGAGTCGAAGTGCAGGCAACATGCTCACCTTT	:::::::::0:0:16:::::19:-10:41:::	CD8
875	TGTGCCGTCGGAGATGACAAGATCATCTTT	TRAV12-2	0	TRAJ30	TRAV12	TRAJ30	CAVGDDKIIF	TGTGCCGTCGGAGATGACAAGATCATCTTT	:::::::::0:-5:8:::::10:-6:30:::	CD8
876	TGTGCAGGCTCCCGGATGGATAGCAGCTATAAATTGATCTTC	TRAV27	0	TRAJ12	TRAV27	TRAJ12	CAGSRMDSSYKLIF	TGTGCAGGCTCCCGGATGGATAGCAGCTATAAATTGATCTTC	:::::::::0:-2:8:::::11:2:42:::	CD8
877	TGTGCAATGAGAGAGCCAATCGTGGGATACAGCACCCTCACCTTT	TRAV14DV4	0	TRAJ11	TRAV14	TRAJ11	CAMREPIVGYSTLTF	TGTGCAATGAGAGAGCCAATCGTGGGATACAGCACCCTCACCTTT	:::::::::0:-2:15:::::24:-8:45:::	CD8
878	TGTGCTTATAGGAGCGCCATAATTCAGGGAGCCCAGAAGCTGGTATTT	TRAV38-2DV8	0	TRAJ54	TRAV38	TRAJ54	CAYRSAIIQGAQKLVF	TGTGCTTATAGGAGCGCCATAATTCAGGGAGCCCAGAAGCTGGTATTT	:::::::::0:0:16:::::18:1:48:::	CD4
879	TGTGCTGTGGAGGGGGTTAGCAACTATCAGTTAATCTGG	TRAV21	0	TRAJ33	TRAV21	TRAJ33	CAVEGVSNYQLIW	TGTGCTGTGGAGGGGGTTAGCAACTATCAGTTAATCTGG	:::::::::0:0:13:::::14:-1:39:::	CD4
880	TGTGCCGTGAACAAAGAAACTGACAGCTGGGGGAAATTGCAGTTT	TRAV12-2	0	TRAJ24	TRAV12	TRAJ24	CAVNKETDSWGKLQF	TGTGCCGTGAACAAAGAAACTGACAGCTGGGGGAAATTGCAGTTT	:::::::::0:0:13:::::17:-4:45:::	CD8
881	TGTGCCGTGACATCAGACAAGCTCATCTTT	TRAV12-2	0	TRAJ34	TRAV12	TRAJ34	CAVTSDKLIF	TGTGCCGTGACATCAGACAAGCTCATCTTT	:::::::::0:-3:10:::::15:-12:30:::	CD8
882	TACCTAATCTTT	TRAV27	0	TRAJ37	TRAV27	TRAJ37	YLIF	TACCTAATCTTT	:::::::::0:-9:1:::::3:-22:12:::	CD4
883	TGTGCTGCGCCCTTAGGAGGAAACACACCTCTTGTCTTT	TRAV21	0	TRAJ29	TRAV21	TRAJ29	CAAPLGGNTPLVF	TGTGCTGCGCCCTTAGGAGGAAACACACCTCTTGTCTTT	:::::::::0:-5:7:::::17:-7:39:::	CD4
884	TGTGCAATGTGGGGTAACACCGACAAGCTCATCTTT	TRAV12-3	0	TRAJ34	TRAV12	TRAJ34	CAMWGNTDKLIF	TGTGCAATGTGGGGTAACACCGACAAGCTCATCTTT	:::::::::0:-4:9:::::14:-5:36:::	CD8
885	TGTGGCACAGAATTAAGGGAGGTTCTGCAAGGCAACTGACCTTT	TRAV30	0	TRAJ22	TRAV30	TRAJ22	CGTELRE_SARQLTF	TGTGGCACAGAATTAAGGGAGGTTCTGCAAGGCAACTGACCTTT	:::::::::0:-2:11:::::20:-8:44:::	CD8
886	TGTGCAGAGAATAGGAAGGATAGCAACTATCAGTTAATCTGG	TRAV13-2	0	TRAJ33	TRAV13	TRAJ33	CAENRKDSNYQLIW	TGTGCAGAGAATAGGAAGGATAGCAACTATCAGTTAATCTGG	:::::::::0:0:13:::::17:-1:42:::	CD4
887	TGTGTGGTTTAGTCTGGTGGCTACAATAAGCTGATTTTT	TRAV12-1	0	TRAJ4	TRAV12	TRAJ4	CVV*SGGYNKLIF	TGTGTGGTTTAGTCTGGTGGCTACAATAAGCTGATTTTT	:::::::::0:-5:8:::::12:-5:39:::	CD8
888	TGTGCTCTCCTGGTTTAGAAACTGGGGCAAACAACCTCTTCTTT	TRDV1	0	TRAJ36	TRDV1	TRAJ36	CALLV*K_GANNLFF	TGTGCTCTCCTGGTTTAGAAACTGGGGCAAACAACCTCTTCTTT	:::::::::0:-9:8:::::18:-2:44:::	CD8
889	TGCGCTGGGGACACGGGCAGGAGAGCACTTACTTTT	TRAV1-1	0	TRAJ5	TRAV1	TRAJ5	CAGDTGRRALTF	TGCGCTGGGGACACGGGCAGGAGAGCACTTACTTTT	:::::::::0:-7:7:::::8:-1:36:::	CD8
890	TGTGCTGTCCGGACCATGGATAGCAACTATCAGTTAATCTGG	TRAV21	0	TRAJ33	TRAV21	TRAJ33	CAVRTMDSNYQLIW	TGTGCTGTCCGGACCATGGATAGCAACTATCAGTTAATCTGG	:::::::::0:-4:8:::::13:3:42:::	CD8
891	TGTGCTGTGAGCTCACCCATGACAACTGACAGCTGGGGGAAATTGCAGTTT	TRAV8-4	0	TRAJ24	TRAV8	TRAJ24	CAVSSPMTTDSWGKLQF	TGTGCTGTGAGCTCACCCATGACAACTGACAGCTGGGGGAAATTGCAGTTT	:::::::::0:-3:11:::::17:2:51:::	CD8
892	TGTGCTGTGAAGCGGGGTGGAGGAAGCCAAGGAAATCTCATCTTT	TRAV21	0	TRAJ42	TRAV21	TRAJ42	CAVKRGGGSQGNLIF	TGTGCTGTGAAGCGGGGTGGAGGAAGCCAAGGAAATCTCATCTTT	:::::::::0:-2:10:::::17:-7:45:::	CD4
893	TGTGCTCTGAGCTCCCTAAATGCTGGTGGTACTAGCTATGGAAAGCTGACATTT	TRAV19	0	TRAJ52	TRAV19	TRAJ52	CALSSLNAGGTSYGKLTF	TGTGCTCTGAGCTCCCTAAATGCTGGTGGTACTAGCTATGGAAAGCTGACATTT	:::::::::0:-6:11:::::18:-2:54:::	CD8
894	TGCCTCGTGGGGGATTTTTATAACCAGGGAGGAAAGCTTATCTTC	TRAV4	0	TRAJ23	TRAV4	TRAJ23	CLVGDFYNQGGKLIF	TGCCTCGTGGGGGATTTTTATAACCAGGGAGGAAAGCTTATCTTC	:::::::::0:-2:14:::::16:-3:45:::	CD8
895	TGTGCCGTGAACCCGGATGACAAGATCATCTTT	TRAV12-2	0	TRAJ30	TRAV12	TRAJ30	CAVNPDDKIIF	TGTGCCGTGAACCCGGATGACAAGATCATCTTT	:::::::::0:-1:12:::::15:-8:33:::	CD8
896	TGTGCCTCAAGTGGGGGAAAGCTTATCTTC	TRAV12-2	0	TRAJ23	TRAV12	TRAJ23	CASSGGKLIF	TGTGCCTCAAGTGGGGGAAAGCTTATCTTC	:::::::::0:-7:6:::::12:-13:30:::	CD8
897	TGTGCTACGGACGATACCTCAGGAACCTACAAATACATCTTT	TRAV17	0	TRAJ40	TRAV17	TRAJ40	CATDDTSGTYKYIF	TGTGCTACGGACGATACCTCAGGAACCTACAAATACATCTTT	:::::::::0:0:13:::::14:-2:42:::	CD4
898	TGTGCAATGAGCGGGGGGAACACAGGCTTTCAGAAACTTGTATTT	TRAV12-3	0	TRAJ8	TRAV12	TRAJ8	CAMSGGNTGFQKLVF	TGTGCAATGAGCGGGGGGAACACAGGCTTTCAGAAACTTGTATTT	:::::::::0:0:13:::::17:-1:45:::	CD4
899	TGTGCAATGAGCGAGAGTAAGAGCAGGAGAGCACTTACTTTT	TRAV12-3	0	TRAJ5	TRAV12	TRAJ5	CAMSESKSRRALTF	TGTGCAATGAGCGAGAGTAAGAGCAGGAGAGCACTTACTTTT	:::::::::0:0:13:::::22:-9:42:::	CD4
900	TGTGCTCTTGGGGAACTGGGGAATAACAATGACATGCGCTTT	TRDV1	0	TRAJ43	TRDV1	TRAJ43	CALGELGNNNDMRF	TGTGCTCTTGGGGAACTGGGGAATAACAATGACATGCGCTTT	:::::::::0:0:17:::::21:-2:42:::	CD8
901	TGTGCAGAGAGACCCCCTGGTTCTGCAAGGCAACTGACCTTT	TRAV5	0	TRAJ22	TRAV5	TRAJ22	CAERPPGSARQLTF	TGTGCAGAGAGACCCCCTGGTTCTGCAAGGCAACTGACCTTT	:::::::::0:-2:11:::::16:-6:42:::	CD4
902	TGTGCTGTGAGTGATCGACCTACTGACAGCTGGGGGAAATTGCAGTTT	TRAV8-4	0	TRAJ24	TRAV8	TRAJ24	CAVSDRPTDSWGKLQF	TGTGCTGTGAGTGATCGACCTACTGACAGCTGGGGGAAATTGCAGTTT	:::::::::0:0:14:::::21:-5:48:::	CD4
903	TGTGCTGTGAGAGACATTGTGGGTGGTGCTACAAACAAGCTCATCTTT	TRAV3	0	TRAJ32	TRAV3	TRAJ32	CAVRDIVGGATNKLIF	TGTGCTGTGAGAGACATTGTGGGTGGTGCTACAAACAAGCTCATCTTT	:::::::::0:0:16:::::21:-8:48:::	CD8
904	TGTGCTCTGAGTGAGGCAAGAGGAGGTGCTGACGGACTCACCTTT	TRAV19	0	TRAJ45	TRAV19	TRAJ45	CALSEARGGADGLTF	TGTGCTCTGAGTGAGGCAAGAGGAGGTGCTGACGGACTCACCTTT	:::::::::0:0:17:::::16:-6:45:::	CD4
905	TGTGCTGTGAGTGAAAGGGTGGGAACTCACGGGAGGAGGAAACAAACTCACCTTT	TRAV8-4	0	TRAJ10	TRAV8	TRAJ10	CAVSERVGT_TGGGNKLTF	TGTGCTGTGAGTGAAAGGGTGGGAACTCACGGGAGGAGGAAACAAACTCACCTTT	:::::::::0:0:14:::::24:-2:55:::	CD8
906	TGTGCTGTCCTCCCCCTTGGGCAGGGAGGAAAGCTTATCTTC	TRAV8-4	0	TRAJ23	TRAV8	TRAJ23	CAVLPLGQGGKLIF	TGTGCTGTCCTCCCCCTTGGGCAGGGAGGAAAGCTTATCTTC	:::::::::0:-6:8:::::21:-11:42:::	CD4
907	TGCCCTATCAAGGGGGGCTTTCAGAAACTTGTATTT	TRAV4	0	TRAJ8	TRAV4	TRAJ8	CPIKGGFQKLVF	TGCCCTATCAAGGGGGGCTTTCAGAAACTTGTATTT	:::::::::0:-12:4:::::15:-8:36:::	CD4
908	TGCATCCTGAGGTATAACCAGGGAGGAAAGCTTATCTTC	TRAV26-2	0	TRAJ23	TRAV26	TRAJ23	CILRYNQGGKLIF	TGCATCCTGAGGTATAACCAGGGAGGAAAGCTTATCTTC	:::::::::0:-4:11:::::3:4:39:::	CD4
909	TGTGCAGAGAATATAGGACGAGACTACAAGCTCAGCTTT	TRAV13-2	0	TRAJ20	TRAV13	TRAJ20	CAENIGRDYKLSF	TGTGCAGAGAATATAGGACGAGACTACAAGCTCAGCTTT	:::::::::0:0:13:::::21:-8:39:::	CD4
910	TGTGCTCTGAGTGAGGCAGGGGCTGCAGGCAACAAGCTAACTTTT	TRAV19	0	TRAJ17	TRAV19	TRAJ17	CALSEAGAAGNKLTF	TGTGCTCTGAGTGAGGCAGGGGCTGCAGGCAACAAGCTAACTTTT	:::::::::0:0:17:::::21:-8:45:::	CD8
911	TGTGCCGTGATCTCTGGGGGTTACCAGAAAGTTACCTTT	TRAV12-2	0	TRAJ13	TRAV12	TRAJ13	CAVISGGYQKVTF	TGTGCCGTGATCTCTGGGGGTTACCAGAAAGTTACCTTT	:::::::::0:-3:10:::::12:-5:39:::	CD8
912	TGTGCTGTGCCATGGATGGATGACAAGATCATCTTT	TRAV21	0	TRAJ30	TRAV21	TRAJ30	CAVPWMDDKIIF	TGTGCTGTGCCATGGATGGATGACAAGATCATCTTT	:::::::::0:-3:9:::::18:-8:36:::	CD4
913	TGTGCCGTTAGTGGCTCTAGGTTGACCTTT	TRAV12-2	0	TRAJ58	TRAV12	TRAJ58	CAVSGSRLTF	TGTGCCGTTAGTGGCTCTAGGTTGACCTTT	:::::::::0:-5:8:::::9:-11:30:::	CD8
914	TGTGCTGTGAGTACCCTTTCTGGTGGCTACAATAAGCTGATTTTT	TRAV8-6	0	TRAJ4	TRAV8	TRAJ4	CAVSTLSGGYNKLIF	TGTGCTGTGAGTACCCTTTCTGGTGGCTACAATAAGCTGATTTTT	:::::::::0:-2:12:::::16:-3:45:::	CD4
915	TGTGCTGTGAGCTGTAACTTCCAGCGACCGAATTCAGGATACAGCACCCTCACCTTT	TRAV21	0	TRAJ11	TRAV21	TRAJ11	CAVSCNFQRPNSGYSTLTF	TGTGCTGTGAGCTGTAACTTCCAGCGACCGAATTCAGGATACAGCACCCTCACCTTT	:::::::::0:-1:11:::::29:-1:57:::	CD8
916	TGTGCTGTGGAGAAAGTGGATAGCAACTATCAGTTAATCTGG	TRAV22	0	TRAJ33	TRAV22	TRAJ33	CAVEKVDSNYQLIW	TGTGCTGTGGAGAAAGTGGATAGCAACTATCAGTTAATCTGG	:::::::::0:-1:12:::::16:0:42:::	CD8
917	TGTGTGGTGACTCCCTACTATGCACTCAACTTC	TRAV12-1	0	TRAJ41	TRAV12	TRAJ41	CVVTPYYALNF	TGTGTGGTGACTCCCTACTATGCACTCAACTTC	:::::::::0:-3:10:::::18:-16:33:::	CD8
918	TGTGCTGTGAAGATTCAGGGCGGATCTGAAAAGCTGGTCTTT	TRAV21	0	TRAJ57	TRAV21	TRAJ57	CAVKIQGGSEKLVF	TGTGCTGTGAAGATTCAGGGCGGATCTGAAAAGCTGGTCTTT	:::::::::0:-2:10:::::14:-4:42:::	CD8
919	TGTGCTGTACTCCACCTTCAGATCGGAGAAACCAGTGGCTCTAGGTTGACCTTT	TRAV20	0	TRAJ58	TRAV20	TRAJ58	CAVLHLQIGETSGSRLTF	TGTGCTGTACTCCACCTTCAGATCGGAGAAACCAGTGGCTCTAGGTTGACCTTT	:::::::::0:-5:8:::::26:-4:54:::	CD8
920	TGTGCCGTGATTCACTACAAGCTCAGCTTT	TRAV12-2	0	TRAJ20	TRAV12	TRAJ20	CAVIHYKLSF	TGTGCCGTGATTCACTACAAGCTCAGCTTT	:::::::::0:-3:10:::::13:-9:30:::	CD8
921	TGTGCCGTGGGGAATAACAATGACATGCGCTTT	TRAV12-2	0	TRAJ43	TRAV12	TRAJ43	CAVGNNNDMRF	TGTGCCGTGGGGAATAACAATGACATGCGCTTT	:::::::::0:-4:9:::::12:-2:33:::	CD8
922	TGTGCAGAGAGTACTGGAGGCTTCAAAACTATCTTT	TRAV5	0	TRAJ9	TRAV5	TRAJ9	CAESTGGFKTIF	TGTGCAGAGAGTACTGGAGGCTTCAAAACTATCTTT	:::::::::0:0:13:::::11:-5:36:::	CD4
923	TGTGCAGAGAGTCCCTATAACACCGACAAGCTCATCTTT	TRAV13-2	0	TRAJ34	TRAV13	TRAJ34	CAESPYNTDKLIF	TGTGCAGAGAGTCCCTATAACACCGACAAGCTCATCTTT	:::::::::0:-3:10:::::15:-3:39:::	CD8
924	TGTGCTTGTAACACGGGCAGGAGAGCACTTACTTTT	TRAV17	0	TRAJ5	TRAV17	TRAJ5	CACNTGRRALTF	TGTGCTTGTAACACGGGCAGGAGAGCACTTACTTTT	:::::::::0:-7:6:::::10:-3:36:::	CD4
925	TGTGCCGTGAACAGTGGTAACAATGCCAGACTCATGTTT	TRAV12-2	0	TRAJ31	TRAV12	TRAJ31	CAVNSGNNARLMF	TGTGCCGTGAACAGTGGTAACAATGCCAGACTCATGTTT	:::::::::0:0:13:::::17:-4:39:::	CD8
926	TGTGCTGTGCGTTCATACTCTGGGGCTGGGAGTTACCAACTCACTTTC	TRAV22	0	TRAJ28	TRAV22	TRAJ28	CAVRSYSGAGSYQLTF	TGTGCTGTGCGTTCATACTCTGGGGCTGGGAGTTACCAACTCACTTTC	:::::::::0:-4:9:::::13:0:48:::	CD8
927	TGTGCTGTATGTACTGGAGCCAATAGTAAGCTGACATTT	TRAV21	0	TRAJ56	TRAV21	TRAJ56	CAVCTGANSKLTF	TGTGCTGTATGTACTGGAGCCAATAGTAAGCTGACATTT	:::::::::0:-4:8:::::11:-3:39:::	CD8
928	TGTGCAGGAGCAAGGAGTGGAGGTAGCAACTATAAACTGACATTT	TRAV27	0	TRAJ53	TRAV27	TRAJ53	CAGARSGGSNYKLTF	TGTGCAGGAGCAAGGAGTGGAGGTAGCAACTATAAACTGACATTT	:::::::::0:0:10:::::15:-5:45:::	CD4
929	TGCCTCGTGGGTGACCCCACGGGAGGAGGAAACAAACTCACCTTT	TRAV4	0	TRAJ10	TRAV4	TRAJ10	CLVGDPTGGGNKLTF	TGCCTCGTGGGTGACCCCACGGGAGGAGGAAACAAACTCACCTTT	:::::::::0:-1:15:::::17:-5:45:::	CD8
930	TGTGCAGGAGCAACGATTCGGGGCCAGAAGCTGCTCTTT	TRAV27	0	TRAJ16	TRAV27	TRAJ16	CAGATIRGQKLLF	TGTGCAGGAGCAACGATTCGGGGCCAGAAGCTGCTCTTT	:::::::::0:0:10:::::21:-11:39:::	CD8
931	TGTGCAGCCTCTAATGCTGGTGGTACTAGCTATGGAAAGCTGACATTT	TRAV12-3	0	TRAJ52	TRAV12	TRAJ52	CAASNAGGTSYGKLTF	TGTGCAGCCTCTAATGCTGGTGGTACTAGCTATGGAAAGCTGACATTT	:::::::::0:-7:6:::::10:0:48:::	CD4
932	TGTGCTGTGGAGAATTCTGGGGGTTACCAGAAAGTTACCTTT	TRAV21	0	TRAJ13	TRAV21	TRAJ13	CAVENSGGYQKVTF	TGTGCTGTGGAGAATTCTGGGGGTTACCAGAAAGTTACCTTT	:::::::::0:-3:9:::::11:-1:42:::	CD8
933	TGTGCTGTGAGCCCTTCTGGTGGCTACAATAAGCTGATTTTT	TRAV8-6	0	TRAJ4	TRAV8	TRAJ4	CAVSPSGGYNKLIF	TGTGCTGTGAGCCCTTCTGGTGGCTACAATAAGCTGATTTTT	:::::::::0:-3:11:::::14:-4:42:::	CD4
934	TGTGCTGTGCCTAATTCTGGGGGTTACCAGAAAGTTACCTTT	TRAV21	0	TRAJ13	TRAV21	TRAJ13	CAVPNSGGYQKVTF	TGTGCTGTGCCTAATTCTGGGGGTTACCAGAAAGTTACCTTT	:::::::::0:-3:9:::::12:-2:42:::	CD4
935	TGTGCTGTCTCTAACGACTACAAGCTCAGCTTT	TRAV21	0	TRAJ20	TRAV21	TRAJ20	CAVSNDYKLSF	TGTGCTGTCTCTAACGACTACAAGCTCAGCTTT	:::::::::0:-4:8:::::9:-2:33:::	CD8
936	TGTGCCGTGACAGATGACAAGATCATCTTT	TRAV12-2	0	TRAJ30	TRAV12	TRAJ30	CAVTDDKIIF	TGTGCCGTGACAGATGACAAGATCATCTTT	:::::::::0:-3:10:::::11:-7:30:::	CD8
937	TGTGCTGTGAGTTCCCTTTCTGGTGGCTACAATAAGCTGATTTTT	TRAV8-6	0	TRAJ4	TRAV8	TRAJ4	CAVSSLSGGYNKLIF	TGTGCTGTGAGTTCCCTTTCTGGTGGCTACAATAAGCTGATTTTT	:::::::::0:-2:12:::::16:-3:45:::	CD4
938	TGTGCTGCGAGCACTACCTCAGGAACCTACAAATACATCTTT	TRAV22	0	TRAJ40	TRAV22	TRAJ40	CAASTTSGTYKYIF	TGTGCTGCGAGCACTACCTCAGGAACCTACAAATACATCTTT	:::::::::0:-6:7:::::9:3:42:::	CD4
939	TGTGCTGTGAGTGGGAACAACAGACTCGCTTTT	TRAV21	0	TRAJ7	TRAV21	TRAJ7	CAVSGNNRLAF	TGTGCTGTGAGTGGGAACAACAGACTCGCTTTT	:::::::::0:-1:11:::::11:-6:33:::	CD8
940	TGTGCTACGGAGCCGAACACCGGTAACCAGTTCTATTTT	TRAV17	0	TRAJ49	TRAV17	TRAJ49	CATEPNTGNQFYF	TGTGCTACGGAGCCGAACACCGGTAACCAGTTCTATTTT	:::::::::0:-2:11:::::13:1:39:::	CD8
941	TGTGCTCTGAGTGATCAGGCTGGGGCAAACAACCTCTTCTTT	TRAV9-2	0	TRAJ36	TRAV9	TRAJ36	CALSDQAGANNLFF	TGTGCTCTGAGTGATCAGGCTGGGGCAAACAACCTCTTCTTT	:::::::::0:0:14:::::11:3:42:::	CD4
942	TGTGCCGTCAGAGATGACAAGATCATCTTT	TRAV12-2	0	TRAJ30	TRAV12	TRAJ30	CAVRDDKIIF	TGTGCCGTCAGAGATGACAAGATCATCTTT	:::::::::0:-5:8:::::8:-4:30:::	CD8
943	TGTGCCGTGATTTTTTCTGGGGGTTACCAGAAAGTTACCTTT	TRAV27	0	TRAJ13	TRAV27	TRAJ13	CAVIFSGGYQKVTF	TGTGCCGTGATTTTTTCTGGGGGTTACCAGAAAGTTACCTTT	:::::::::0:-5:5:::::14:-4:42:::	CD8
944	TGTGCCGTGAGGGATGACAAGATCATCTTT	TRAV12-2	0	TRAJ30	TRAV12	TRAJ30	CAVRDDKIIF	TGTGCCGTGAGGGATGACAAGATCATCTTT	:::::::::0:-3:10:::::9:-5:30:::	CD8
945	TGTGCTGTGACCGGGGGTTACCAGAAAGTTACCTTT	TRAV8-4	0	TRAJ13	TRAV8	TRAJ13	CAVTGGYQKVTF	TGTGCTGTGACCGGGGGTTACCAGAAAGTTACCTTT	:::::::::0:-4:10:::::12:-8:36:::	CD4
946	TGTGCCGTGAGAGATGACAAGATCATCTTT	TRAV12-2	0	TRAJ30	TRAV12	TRAJ30	CAVRDDKIIF	TGTGCCGTGAGAGATGACAAGATCATCTTT	:::::::::0:-3:10:::::9:-5:30:::	CD8
947	TGCCTCGTGGGTGACGGCGACTACAAGCTCAGCTTT	TRAV4	0	TRAJ20	TRAV4	TRAJ20	CLVGDGDYKLSF	TGCCTCGTGGGTGACGGCGACTACAAGCTCAGCTTT	:::::::::0:-1:15:::::17:-7:36:::	CD8
948	TGTGCTTATTCAGGACGGCGGGGCGGCACTGCCAGTAAACTCACCTTT	TRAV38-2DV8	0	TRAJ44	TRAV38	TRAJ44	CAYSGRRGGTASKLTF	TGTGCTTATTCAGGACGGCGGGGCGGCACTGCCAGTAAACTCACCTTT	:::::::::0:-7:9:::::23:-7:48:::	CD4
949	TGTGCTGTGAGCGGAAATACTGGAGGCTTCAAAACTATCTTT	TRAV8-6	0	TRAJ9	TRAV8	TRAJ9	CAVSGNTGGFKTIF	TGTGCTGTGAGCGGAAATACTGGAGGCTTCAAAACTATCTTT	:::::::::0:-3:11:::::11:1:42:::	CD4
950	TGGCATGCTGACGGACTCACCTTT	TRAV21	0	TRAJ45	TRAV21	TRAJ45	WHADGLTF	TGGCATGCTGACGGACTCACCTTT	:::::::::0:-10:2:::::5:-16:24:::	CD8
951	TGTGCTGTGCAGGCAGGATATGGAGGAAGCCAAGGAAATCTCATCTTT	TRAV20	0	TRAJ42	TRAV20	TRAJ42	CAVQAGYGGSQGNLIF	TGTGCTGTGCAGGCAGGATATGGAGGAAGCCAAGGAAATCTCATCTTT	:::::::::0:0:13:::::18:-5:48:::	CD8
952	TGTGCAATGAGCGTCCTAACCGACAAGCTCATCTTT	TRAV12-3	0	TRAJ34	TRAV12	TRAJ34	CAMSVLTDKLIF	TGTGCAATGAGCGTCCTAACCGACAAGCTCATCTTT	:::::::::0:0:13:::::18:-9:36:::	CD8
953	TGTGCTGTGCAGGCGAGAGAGAATGCCAGACTCATGTTT	TRAV20	0	TRAJ31	TRAV20	TRAJ31	CAVQARENARLMF	TGTGCTGTGCAGGCGAGAGAGAATGCCAGACTCATGTTT	:::::::::0:0:13:::::21:-8:39:::	CD4
954	TGTGCAATGAGAGCTAATGCTGGTGGTACTAGCTATGGAAAGCTGACATTT	TRAV14DV4	0	TRAJ52	TRAV14	TRAJ52	CAMRANAGGTSYGKLTF	TGTGCAATGAGAGCTAATGCTGGTGGTACTAGCTATGGAAAGCTGACATTT	:::::::::0:-4:13:::::11:2:51:::	CD8
955	TGTGCTGCCCAGAGGGATAGCAGCTATAAATTGATCTTC	TRAV21	0	TRAJ12	TRAV21	TRAJ12	CAAQRDSSYKLIF	TGTGCTGCCCAGAGGGATAGCAGCTATAAATTGATCTTC	:::::::::0:-5:7:::::8:2:39:::	CD8
956	TGTGCCGTTAGAGATGACAAGATCATCTTT	TRAV12-2	0	TRAJ30	TRAV12	TRAJ30	CAVRDDKIIF	TGTGCCGTTAGAGATGACAAGATCATCTTT	:::::::::0:-5:8:::::9:-5:30:::	CD8
957	TGTGCAGCAGCCCAAAGTAAACTCACCTTT	TRAV13-1	0	TRAJ44	TRAV13	TRAJ44	CAAAQSKLTF	TGTGCAGCAGCCCAAAGTAAACTCACCTTT	:::::::::0:-4:9:::::15:-17:30:::	CD8
958	TGTGCATCCACTGAGATCTTATAACACCGACAAGCTCATCTTT	TRAV13-1	0	TRAJ34	TRAV13	TRAJ34	CASTEIL_NTDKLIF	TGTGCATCCACTGAGATCTTATAACACCGACAAGCTCATCTTT	:::::::::0:-7:6:::::13:3:43:::	CD8
959	TGCCTCGTGGGCCCCCGGGCCGACACAGGCAAACTAATCTTT	TRAV4	0	TRAJ37	TRAV4	TRAJ37	CLVGPRADTGKLIF	TGCCTCGTGGGCCCCCGGGCCGACACAGGCAAACTAATCTTT	:::::::::0:-5:11:::::22:-11:42:::	CD4
960	TGTGCTGTGCACTCGGACGATTTTTCTTCTGGTTCTGCAAGGCAACTGACCTTT	TRAV20	0	TRAJ22	TRAV20	TRAJ22	CAVHSDDFSSGSARQLTF	TGTGCTGTGCACTCGGACGATTTTTCTTCTGGTTCTGCAAGGCAACTGACCTTT	:::::::::0:-2:11:::::22:0:54:::	CD8
961	TGTGCAGAGCGTCATGGGGCTGGGAGTTACCAACTCACTTTC	TRAV25	0	TRAJ28	TRAV25	TRAJ28	CAERHGAGSYQLTF	TGTGCAGAGCGTCATGGGGCTGGGAGTTACCAACTCACTTTC	:::::::::0:-2:7:::::14:-7:42:::	CD8
962	TGTGCTACGGACGCCCAGGCAGGAACTGCTCTGATCTTT	TRAV17	0	TRAJ15	TRAV17	TRAJ15	CATDAQAGTALIF	TGTGCTACGGACGCCCAGGCAGGAACTGCTCTGATCTTT	:::::::::0:0:13:::::14:-4:39:::	CD8
963	TGTGCTGTGGAGGGGATTCAGGGAGCCCAGAAGCTGGTATTT	TRAV22	0	TRAJ54	TRAV22	TRAJ54	CAVEGIQGAQKLVF	TGTGCTGTGGAGGGGATTCAGGGAGCCCAGAAGCTGGTATTT	:::::::::0:-1:12:::::15:-2:42:::	CD4
964	TGTGCAGCAAGCCCCCTCTCAGGAACCTACAAATACATCTTT	TRAV29DV5	0	TRAJ40	TRAV29	TRAJ40	CAASPLSGTYKYIF	TGTGCAGCAAGCCCCCTCTCAGGAACCTACAAATACATCTTT	:::::::::0:-1:12:::::17:-5:42:::	CD4
965	TGTGCAGAGTGCACCCCCTACACCGACAAGCTCATCTTT	TRAV13-2	0	TRAJ34	TRAV13	TRAJ34	CAECTPYTDKLIF	TGTGCAGAGTGCACCCCCTACACCGACAAGCTCATCTTT	:::::::::0:-4:9:::::19:-7:39:::	CD8
966	TGTGCAGGAGGGAGAATTGCGCGAGGAACCTACAAATACATCTTT	TRAV27	0	TRAJ40	TRAV27	TRAJ40	CAGGRIARGTYKYIF	TGTGCAGGAGGGAGAATTGCGCGAGGAACCTACAAATACATCTTT	:::::::::0:0:10:::::23:-8:45:::	CD8
967	TGTGCAGCAAGGCCCCTTTCAGGAACCTACAAATACATCTTT	TRAV13-1	0	TRAJ40	TRAV13	TRAJ40	CAARPLSGTYKYIF	TGTGCAGCAAGGCCCCTTTCAGGAACCTACAAATACATCTTT	:::::::::0:-2:11:::::18:-6:42:::	CD4
968	TGTGCTGTATTGATGGATAGCAACTATCAGTTAATCTGG	TRAV22	0	TRAJ33	TRAV22	TRAJ33	CAVLMDSNYQLIW	TGTGCTGTATTGATGGATAGCAACTATCAGTTAATCTGG	:::::::::0:-5:8:::::12:1:39:::	CD8
969	TGTGCAGCAAGCGGGGTCGGTGGTACTAGCTATGGAAAGCTGACATTT	TRAV29DV5	0	TRAJ52	TRAV29	TRAJ52	CAASGVGGTSYGKLTF	TGTGCAGCAAGCGGGGTCGGTGGTACTAGCTATGGAAAGCTGACATTT	:::::::::0:0:13:::::18:-8:48:::	CD4
970	TGTGCAGCATCCTCTACCTCAGGAACCTACAAATACATCTTT	TRAV29DV5	0	TRAJ40	TRAV29	TRAJ40	CAASSTSGTYKYIF	TGTGCAGCATCCTCTACCTCAGGAACCTACAAATACATCTTT	:::::::::0:-4:9:::::13:-1:42:::	CD4
971	TGTGCCGTTACGGCTAATACTGGAGGCTTCAAAACTATCTTT	TRAV12-2	0	TRAJ9	TRAV12	TRAJ9	CAVTANTGGFKTIF	TGTGCCGTTACGGCTAATACTGGAGGCTTCAAAACTATCTTT	:::::::::0:-5:8:::::15:-3:42:::	CD4
972	TGTGTGTCCGCCGATGACAAGATCATCTTT	TRAV12-1	0	TRAJ30	TRAV12	TRAJ30	CVSADDKIIF	TGTGTGTCCGCCGATGACAAGATCATCTTT	:::::::::0:-7:6:::::12:-8:30:::	CD8
973	TGTGCAGCAACCCCAACCTCAGGAACCTACAAATACATCTTT	TRAV29DV5	0	TRAJ40	TRAV29	TRAJ40	CAATPTSGTYKYIF	TGTGCAGCAACCCCAACCTCAGGAACCTACAAATACATCTTT	:::::::::0:-3:10:::::15:-3:42:::	CD4
974	TGTGCTCTGAGTGTATCCGGAGGAAGCCAAGGAAATCTCATCTTT	TRAV19	0	TRAJ42	TRAV19	TRAJ42	CALSVSGGSQGNLIF	TGTGCTCTGAGTGTATCCGGAGGAAGCCAAGGAAATCTCATCTTT	:::::::::0:-4:13:::::18:-8:45:::	CD8
975	TGTGCTGTGCAGGCGGGGTAGCAACTATCAGTTAATCTGG	TRAV20	0	TRAJ33	TRAV20	TRAJ33	CAVQAG*_NYQLIW	TGTGCTGTGCAGGCGGGGTAGCAACTATCAGTTAATCTGG	:::::::::0:0:13:::::15:-1:40:::	CD8
976	TGTGGCACAGAGAGGGGCTCTAGCAACACAGGCAAACTAATCTTT	TRAV30	0	TRAJ37	TRAV30	TRAJ37	CGTERGSSNTGKLIF	TGTGGCACAGAGAGGGGCTCTAGCAACACAGGCAAACTAATCTTT	:::::::::0:0:13:::::15:-1:45:::	CD8
977	TGTGCAGCAGAACACTACAAGCTCAGCTTT	TRAV13-1	0	TRAJ20	TRAV13	TRAJ20	CAAEHYKLSF	TGTGCAGCAGAACACTACAAGCTCAGCTTT	:::::::::0:-4:9:::::10:-5:30:::	CD8
978	TGTGCTGTGAGAGGCCCTAATACTGGAGGCTTCAAAACTATCTTT	TRAV3	0	TRAJ9	TRAV3	TRAJ9	CAVRGPNTGGFKTIF	TGTGCTGTGAGAGGCCCTAATACTGGAGGCTTCAAAACTATCTTT	:::::::::0:-3:13:::::18:-3:45:::	CD4
979	TGTGCTTATAGGAGCTATTCGGGAACCTCCTACGACAAGGTGATATTT	TRAV38-2DV8	0	TRAJ50	TRAV38	TRAJ50	CAYRSYSGTSYDKVIF	TGTGCTTATAGGAGCTATTCGGGAACCTCCTACGACAAGGTGATATTT	:::::::::0:-1:15:::::23:-4:48:::	CD8
980	TGTGCCGTGACGGGCACCGACAAGCTCATCTTT	TRAV12-2	0	TRAJ34	TRAV12	TRAJ34	CAVTGTDKLIF	TGTGCCGTGACGGGCACCGACAAGCTCATCTTT	:::::::::0:-3:10:::::14:-8:33:::	CD8
981	TGTGCTGTGACCGGAGGGGTCACGGGAGGAGGAAACAAACTCACCTTT	TRAV8-4	0	TRAJ10	TRAV8	TRAJ10	CAVTGGVTGGGNKLTF	TGTGCTGTGACCGGAGGGGTCACGGGAGGAGGAAACAAACTCACCTTT	:::::::::0:-4:10:::::19:-4:48:::	CD8
982	TGCCTCGTGGGTGACCGCGGACGTAAGCTGATTTGG	TRAV4	0	TRAJ38	TRAV4	TRAJ38	CLVGDRGRKLIW	TGCCTCGTGGGTGACCGCGGACGTAAGCTGATTTGG	:::::::::0:-1:15:::::21:-16:36:::	CD8
983	TGTGCTGTTCCTCGAGGAGGTGCTGACGGACTCACCTTT	TRAV21	0	TRAJ45	TRAV21	TRAJ45	CAVPRGGADGLTF	TGTGCTGTTCCTCGAGGAGGTGCTGACGGACTCACCTTT	:::::::::0:-4:8:::::13:-9:39:::	CD4
984	TGTGTTGTGGGCCGGGATTCAGGATACAGCACCCTCACCTTT	TRAV8-2	0	TRAJ11	TRAV8	TRAJ11	CVVGRDSGYSTLTF	TGTGTTGTGGGCCGGGATTCAGGATACAGCACCCTCACCTTT	:::::::::0:-5:9:::::16:-3:42:::	CD4
985	TGTGCTGGGCAGCTTCTGTATGGAAACAAACTGGTCTTT	TRAV35	0	TRAJ47	TRAV35	TRAJ47	CAGQLLYGNKLVF	TGTGCTGGGCAGCTTCTGTATGGAAACAAACTGGTCTTT	:::::::::0:0:12:::::18:-5:39:::	CD8
986	TGTGCAATGAGAGAGGCTTATAACACCAATGCAGGCAAATCAACCTTT	TRAV14DV4	0	TRAJ27	TRAV14	TRAJ27	CAMREAYNTNAGKSTF	TGTGCAATGAGAGAGGCTTATAACACCAATGCAGGCAAATCAACCTTT	:::::::::0:-1:16:::::17:3:48:::	CD8
987	TGCATCCTGAGACCTACTTCTGGTTCTGCAAGGCAACTGACCTTT	TRAV26-2	0	TRAJ22	TRAV26	TRAJ22	CILRPTSGSARQLTF	TGCATCCTGAGACCTACTTCTGGTTCTGCAAGGCAACTGACCTTT	:::::::::0:-3:12:::::16:-3:45:::	CD8
988	TGTGCTGTGAGGGGGGTAGGAGGTAGCAACTATAAACTGACATTT	TRAV8-4	0	TRAJ53	TRAV8	TRAJ53	CAVRGVGGSNYKLTF	TGTGCTGTGAGGGGGGTAGGAGGTAGCAACTATAAACTGACATTT	:::::::::0:-3:11:::::18:-8:45:::	CD4
989	TGTGCTGTGGTCGGGGGAGATGACAAGATCATCTTT	TRAV8-3	0	TRAJ30	TRAV8	TRAJ30	CAVVGGDDKIIF	TGTGCTGTGGTCGGGGGAGATGACAAGATCATCTTT	:::::::::0:-4:10:::::16:-6:36:::	CD8
990	TGTGCTTATAGGAGCGCGGAAACAGGAACCTACAAATACATCTTT	TRAV38-2DV8	0	TRAJ40	TRAV38	TRAJ40	CAYRSAETGTYKYIF	TGTGCTTATAGGAGCGCGGAAACAGGAACCTACAAATACATCTTT	:::::::::0:0:16:::::22:-7:45:::	CD8
991	TGTGCTCTCCCAGCGGGAGGAAACACACCTCTTGTCTTT	TRAV21	0	TRAJ29	TRAV21	TRAJ29	CALPAGGNTPLVF	TGTGCTCTCCCAGCGGGAGGAAACACACCTCTTGTCTTT	:::::::::0:-6:6:::::17:-7:39:::	CD4
992	TGCATCCTGTCTATTCAGGAGGAGGTGCTGACGGACTCACCTTT	TRAV26-2	0	TRAJ45	TRAV26	TRAJ45	CILSIQE_GADGLTF	TGCATCCTGTCTATTCAGGAGGAGGTGCTGACGGACTCACCTTT	:::::::::0:-6:9:::::11:-2:44:::	CD4
993	TGTGCTACGGACGAAACCAGTGGCTCTAGGTTGACCTTT	TRAV17	0	TRAJ58	TRAV17	TRAJ58	CATDETSGSRLTF	TGTGCTACGGACGAAACCAGTGGCTCTAGGTTGACCTTT	:::::::::0:0:13:::::12:-5:39:::	CD8
994	TGTGCACCCCCCGGCGGGAACGACTACAAGCTCAGCTTT	TRAV13-1	0	TRAJ20	TRAV13	TRAJ20	CAPPGGNDYKLSF	TGTGCACCCCCCGGCGGGAACGACTACAAGCTCAGCTTT	:::::::::0:-7:6:::::18:-5:39:::	CD8
995	TGTGCTACGGACGGCAGAGGCTCAACCCTGGGGAGGCTATACTTT	TRAV17	0	TRAJ18	TRAV17	TRAJ18	CATDGRGSTLGRLYF	TGTGCTACGGACGGCAGAGGCTCAACCCTGGGGAGGCTATACTTT	:::::::::0:0:13:::::7:3:45:::	CD8
996	TGTGCTGTGAGCCCTGATAACTATGGTCAGAATTTTGTCTTT	TRAV22	0	TRAJ26	TRAV22	TRAJ26	CAVSPDNYGQNFVF	TGTGCTGTGAGCCCTGATAACTATGGTCAGAATTTTGTCTTT	:::::::::0:0:12:::::15:-2:42:::	CD8
997	TGTGCAGCAAGCATGATTAAAATGGATAGCAACTATCAGTTAATCTGG	TRAV23DV6	0	TRAJ33	TRAV23	TRAJ33	CAASMIKMDSNYQLIW	TGTGCAGCAAGCATGATTAAAATGGATAGCAACTATCAGTTAATCTGG	:::::::::0:0:13:::::21:1:48:::	CD8
998	TGTGCAGCAAGTAAGCCCTCAGGAACCTACAAATACATCTTT	TRAV13-1	0	TRAJ40	TRAV13	TRAJ40	CAASKPSGTYKYIF	TGTGCAGCAAGTAAGCCCTCAGGAACCTACAAATACATCTTT	:::::::::0:0:13:::::16:-4:42:::	CD4
999	TGTGCAGCTACTAACTTTGGAAATGAGAAATTAACCTTT	TRAV25	0	TRAJ48	TRAV25	TRAJ48	CAATNFGNEKLTF	TGTGCAGCTACTAACTTTGGAAATGAGAAATTAACCTTT	:::::::::0:-2:7:::::10:-3:39:::	CD4
1000	TGTGCAGCAAGCGTAGGGGTTGGTGGTACTAGCTATGGAAAGCTGACATTT	TRAV29DV5	0	TRAJ52	TRAV29	TRAJ52	CAASVGVGGTSYGKLTF	TGTGCAGCAAGCGTAGGGGTTGGTGGTACTAGCTATGGAAAGCTGACATTT	:::::::::0:0:13:::::20:-7:51:::	CD4
1001	TGTGCCGTGAACAGGGATGCCAGACTCATGTTT	TRAV12-2	0	TRAJ31	TRAV12	TRAJ31	CAVNRDARLMF	TGTGCCGTGAACAGGGATGCCAGACTCATGTTT	:::::::::0:0:13:::::16:-9:33:::	CD8
1002	TGTGCTGTGAGTGATCGTAGTGGAGGTAGCAACTATAAACTGACATTT	TRAV8-4	0	TRAJ53	TRAV8	TRAJ53	CAVSDRSGGSNYKLTF	TGTGCTGTGAGTGATCGTAGTGGAGGTAGCAACTATAAACTGACATTT	:::::::::0:0:14:::::17:-4:48:::	CD4
1003	TGTGCTGTGAGTTCCAATAGCAACTATCAGTTAATCTGG	TRAV8-6	0	TRAJ33	TRAV8	TRAJ33	CAVSSNSNYQLIW	TGTGCTGTGAGTTCCAATAGCAACTATCAGTTAATCTGG	:::::::::0:-2:12:::::16:-3:39:::	CD4
1004	TGTGCTGTGGATCTAATGGTTAGGAATGCCAGACTCATGTTT	TRAV22	0	TRAJ31	TRAV22	TRAJ31	CAVDLMVRNARLMF	TGTGCTGTGGATCTAATGGTTAGGAATGCCAGACTCATGTTT	:::::::::0:-2:11:::::24:-8:42:::	CD8
1005	TGTGTGGTGACCTCCGACAAGGTGATATTT	TRAV12-1	0	TRAJ50	TRAV12	TRAJ50	CVVTSDKVIF	TGTGTGGTGACCTCCGACAAGGTGATATTT	:::::::::0:-3:10:::::10:-9:30:::	CD8
1006	TGCCTCGTGGGTGACGGCCCAGGAGGAGGTGCTGACGGACTCACCTTT	TRAV4	0	TRAJ45	TRAV4	TRAJ45	CLVGDGPGGGADGLTF	TGCCTCGTGGGTGACGGCCCAGGAGGAGGTGCTGACGGACTCACCTTT	:::::::::0:-1:15:::::19:-6:48:::	CD8
1007	TGTGCCGTGAGCGACTACAAGCTCAGCTTT	TRAV12-2	0	TRAJ20	TRAV12	TRAJ20	CAVSDYKLSF	TGTGCCGTGAGCGACTACAAGCTCAGCTTT	:::::::::0:-3:10:::::11:-7:30:::	CD8
1008	TGTGCAGCAAGTACACCTGACAGCTGGGGGAAATTGCAGTTT	TRAV13-1	0	TRAJ24	TRAV13	TRAJ24	CAASTPDSWGKLQF	TGTGCAGCAAGTACACCTGACAGCTGGGGGAAATTGCAGTTT	:::::::::0:0:13:::::12:-2:42:::	CD8
1009	TGTGCTGTGGAGTCTGGTGGCTACAATAAGCTGATTTTT	TRAV8-4	0	TRAJ4	TRAV8	TRAJ4	CAVESGGYNKLIF	TGTGCTGTGGAGTCTGGTGGCTACAATAAGCTGATTTTT	:::::::::0:-2:13:::::12:-5:39:::	CD4
1010	TGTGCTTCGGATAACTATGGTCAGAATTTTGTCTTT	TRAV12-2	0	TRAJ26	TRAV12	TRAJ26	CASDNYGQNFVF	TGTGCTTCGGATAACTATGGTCAGAATTTTGTCTTT	:::::::::0:-8:5:::::8:-1:36:::	CD8
1011	TGTGCTGTGGAGGGATCATCGAGTACAGGCTTTCAGAAACTTGTATTT	TRAV22	0	TRAJ8	TRAV22	TRAJ8	CAVEGSSSTGFQKLVF	TGTGCTGTGGAGGGATCATCGAGTACAGGCTTTCAGAAACTTGTATTT	:::::::::0:-1:12:::::24:-5:48:::	CD8
1012	TGTGCTGTGAGAATGGATAGCAACTATCAGTTAATCTGG	TRAV1-2	0	TRAJ33	TRAV1	TRAJ33	CAVRMDSNYQLIW	TGTGCTGTGAGAATGGATAGCAACTATCAGTTAATCTGG	:::::::::0:-2:12:::::12:1:39:::	CD4
1013	TGTGCTGTGAGTGGCCCACAGTACAATAACAATGACATGCGCTTT	TRAV8-4	0	TRAJ43	TRAV8	TRAJ43	CAVSGPQYNNNDMRF	TGTGCTGTGAGTGGCCCACAGTACAATAACAATGACATGCGCTTT	:::::::::0:-1:13:::::20:2:45:::	CD4
1014	TGTGCAGGAGTCCCAAACAATAACAATGACATGCGCTTT	TRAV27	0	TRAJ43	TRAV27	TRAJ43	CAGVPNNNNDMRF	TGTGCAGGAGTCCCAAACAATAACAATGACATGCGCTTT	:::::::::0:0:10:::::16:0:39:::	CD8
1015	TGTGCCGTGAACGCGATAACTGACAGCTGGGGGAAATTGCAGTTT	TRAV12-2	0	TRAJ24	TRAV12	TRAJ24	CAVNAITDSWGKLQF	TGTGCCGTGAACGCGATAACTGACAGCTGGGGGAAATTGCAGTTT	:::::::::0:-1:12:::::14:-1:45:::	CD8
1016	TGTGCAATGAGCGGGGAGGACAGCACCCTCACCTTT	TRAV12-3	0	TRAJ11	TRAV12	TRAJ11	CAMSGEDSTLTF	TGTGCAATGAGCGGGGAGGACAGCACCCTCACCTTT	:::::::::0:0:13:::::19:-12:36:::	CD4
1017	TGTGCTGTGAGTGATCGAGGAGGAAGCCAAGGAAATCTCATCTTT	TRAV8-4	0	TRAJ42	TRAV8	TRAJ42	CAVSDRGGSQGNLIF	TGTGCTGTGAGTGATCGAGGAGGAAGCCAAGGAAATCTCATCTTT	:::::::::0:0:14:::::18:-8:45:::	CD4
1018	TGTGCTCTGAGTGATCGTCTGGCAACTGACAGCTGGGGGAAATTGCAGTTT	TRAV9-2	0	TRAJ24	TRAV9	TRAJ24	CALSDRLATDSWGKLQF	TGTGCTCTGAGTGATCGTCTGGCAACTGACAGCTGGGGGAAATTGCAGTTT	:::::::::0:0:14:::::16:4:51:::	CD4
1019	TGTGCTGGCCGGACGAACACCGGTAACCAGTTCTATTTT	TRAV35	0	TRAJ49	TRAV35	TRAJ49	CAGRTNTGNQFYF	TGTGCTGGCCGGACGAACACCGGTAACCAGTTCTATTTT	:::::::::0:-4:8:::::13:1:39:::	CD8
1020	TGTGTGGTGAGCAACTATCAGTTAATCTGG	TRAV12-1	0	TRAJ33	TRAV12	TRAJ33	CVVSNYQLIW	TGTGTGGTGAGCAACTATCAGTTAATCTGG	:::::::::0:0:13:::::9:-5:30:::	CD8
1021	TGTGCCGTGGACCTAACAGATGACAAGATCATCTTT	TRAV39	0	TRAJ30	TRAV39	TRAJ30	CAVDLTDDKIIF	TGTGCCGTGGACCTAACAGATGACAAGATCATCTTT	:::::::::0:-1:12:::::17:-7:36:::	CD4
1022	TGTGCAATGAGTGTGTATTCAGGAGGAGGTGCTGACGGACTCACCTTT	TRAV12-3	0	TRAJ45	TRAV12	TRAJ45	CAMSVYSGGGADGLTF	TGTGCAATGAGTGTGTATTCAGGAGGAGGTGCTGACGGACTCACCTTT	:::::::::0:-2:11:::::13:0:48:::	CD8
1023	TGTGCAGAGATCGACTCTGGGGCTGGGAGTTACCAACTCACTTTC	TRAV5	0	TRAJ28	TRAV5	TRAJ28	CAEIDSGAGSYQLTF	TGTGCAGAGATCGACTCTGGGGCTGGGAGTTACCAACTCACTTTC	:::::::::0:-3:10:::::13:-3:45:::	CD8
1024	TGTGCCGGGGGAGATGACAAGATCATCTTT	TRAV12-2	0	TRAJ30	TRAV12	TRAJ30	CAGGDDKIIF	TGTGCCGGGGGAGATGACAAGATCATCTTT	:::::::::0:-6:7:::::10:-6:30:::	CD8
1025	TGTGCCGTGAAAGGTAACACCGACAAGCTCATCTTT	TRAV12-2	0	TRAJ34	TRAV12	TRAJ34	CAVKGNTDKLIF	TGTGCCGTGAAAGGTAACACCGACAAGCTCATCTTT	:::::::::0:-2:11:::::14:-5:36:::	CD8
1026	TGTGCCGTGGAGGGGGGACCGCTCCAGGGAGGAAAGCTTATCTTC	TRAV39	0	TRAJ23	TRAV39	TRAJ23	CAVEGGPLQGGKLIF	TGTGCCGTGGAGGGGGGACCGCTCCAGGGAGGAAAGCTTATCTTC	:::::::::0:-2:11:::::23:-10:45:::	CD8
1027	TGCCTCGTGCCCAAAGGCAGACTCATGTTT	TRAV4	0	TRAJ31	TRAV4	TRAJ31	CLVPKGRLMF	TGCCTCGTGCCCAAAGGCAGACTCATGTTT	:::::::::0:-7:9:::::11:-7:30:::	CD4
1028	TGTGCCGTGAGTTGGGATAGACTCATGTTT	TRAV12-2	0	TRAJ31	TRAV12	TRAJ31	CAVSWDRLMF	TGTGCCGTGAGTTGGGATAGACTCATGTTT	:::::::::0:-3:10:::::18:-14:30:::	CD8
1029	TGTGCTGGGCTACTCAGGCAGTTCTATTTT	TRAV35	0	TRAJ49	TRAV35	TRAJ49	CAGLLRQFYF	TGTGCTGGGCTACTCAGGCAGTTCTATTTT	:::::::::0:-2:10:::::18:-13:30:::	CD8
1030	TGTGCCGTGAAGGATGCCAGACTCATGTTT	TRAV12-2	0	TRAJ31	TRAV12	TRAJ31	CAVKDARLMF	TGTGCCGTGAAGGATGCCAGACTCATGTTT	:::::::::0:-2:11:::::13:-9:30:::	CD8
1031	TGTGCTGTGAGTGACGTTCGGGGGACCGGTAACCAGTTCTATTTT	TRAV8-6	0	TRAJ49	TRAV8	TRAJ49	CAVSDVRGTGNQFYF	TGTGCTGTGAGTGACGTTCGGGGGACCGGTAACCAGTTCTATTTT	:::::::::0:0:14:::::24:-4:45:::	CD4
1032	TGTGCTCTGAGGCTGGACACGGGCAGGAGAGCACTTACTTTT	TRAV9-1	0	TRAJ5	TRAV9	TRAJ5	CALRLDTGRRALTF	TGTGCTCTGAGGCTGGACACGGGCAGGAGAGCACTTACTTTT	:::::::::0:-3:11:::::13:0:42:::	CD8
1033	TGTGCTGTGAGTGCGACCGGCACTGCCAGTAAACTCACCTTT	TRAV8-6	0	TRAJ44	TRAV8	TRAJ44	CAVSATGTASKLTF	TGTGCTGTGAGTGCGACCGGCACTGCCAGTAAACTCACCTTT	:::::::::0:-1:13:::::15:-5:42:::	CD4
1034	TGTGCACCTGAGGGTGGAGGCTTCAAAACTATCTTT	TRAV13-1	0	TRAJ9	TRAV13	TRAJ9	CAPEGGGFKTIF	TGTGCACCTGAGGGTGGAGGCTTCAAAACTATCTTT	:::::::::0:-7:6:::::14:-8:36:::	CD4
1035	TGCATCGGACTTGGAAGAACCTACAAATACATCTTT	TRAV26-2	0	TRAJ40	TRAV26	TRAJ40	CIGLGRTYKYIF	TGCATCGGACTTGGAAGAACCTACAAATACATCTTT	:::::::::0:-9:6:::::16:-10:36:::	CD8
1036	TGTGCGGGCCACACAGGCTTTCAGAAACTTGTATTT	TRAV5	0	TRAJ8	TRAV5	TRAJ8	CAGHTGFQKLVF	TGTGCGGGCCACACAGGCTTTCAGAAACTTGTATTT	:::::::::0:-8:5:::::10:-3:36:::	CD8
1037	TGTGCTGTGGTCGCAGGAAACACACCTCTTGTCTTT	TRAV8-3	0	TRAJ29	TRAV8	TRAJ29	CAVVAGNTPLVF	TGTGCTGTGGTCGCAGGAAACACACCTCTTGTCTTT	:::::::::0:-4:10:::::13:-6:36:::	CD8
1038	TGTGCTGGGCGGACTCCGACCGGTAACCAGTTCTATTTT	TRAV35	0	TRAJ49	TRAV35	TRAJ49	CAGRTPTGNQFYF	TGTGCTGGGCGGACTCCGACCGGTAACCAGTTCTATTTT	:::::::::0:-2:10:::::18:-4:39:::	CD8
1039	TGTGCTCTAGACCCGGTTGGGGCTGGGAGTTACCAACTCACTTTC	TRAV6	0	TRAJ28	TRAV6	TRAJ28	CALDPVGAGSYQLTF	TGTGCTCTAGACCCGGTTGGGGCTGGGAGTTACCAACTCACTTTC	:::::::::0:-1:12:::::17:-7:45:::	CD4
1040	TGTGCAGAGAAGGGCCAGAAGCTGCTCTTT	TRAV13-2	0	TRAJ16	TRAV13	TRAJ16	CAEKGQKLLF	TGTGCAGAGAAGGGCCAGAAGCTGCTCTTT	:::::::::0:-2:11:::::12:-11:30:::	CD4
1041	TGTGCTGTGGGTGTCCAGCGGAGCAGTGCTTCCAAGATAATCTTT	TRAV8-3	0	TRAJ3	TRAV8	TRAJ3	CAVGVQRSSASKIIF	TGTGCTGTGGGTGTCCAGCGGAGCAGTGCTTCCAAGATAATCTTT	:::::::::0:-1:13:::::21:-7:45:::	CD8
1042	TGTGCTGGGACCAATGCAGGCAAATCAACCTTT	TRAV21	0	TRAJ27	TRAV21	TRAJ27	CAGTNAGKSTF	TGTGCTGGGACCAATGCAGGCAAATCAACCTTT	:::::::::0:-2:10:::::9:-4:33:::	CD8
1043	TGTGCCGTGAACTATCAAGATGCTGGTGGTACTAGCTATGGAAAGCTGACATTT	TRAV12-2	0	TRAJ52	TRAV12	TRAJ52	CAVNYQDAGGTSYGKLTF	TGTGCCGTGAACTATCAAGATGCTGGTGGTACTAGCTATGGAAAGCTGACATTT	:::::::::0:-1:12:::::19:-3:54:::	CD4
1044	TGTGTGGTGAGCCTAACTGACAGCTGGGGGAAATTGCAGTTT	TRAV10	0	TRAJ24	TRAV10	TRAJ24	CVVSLTDSWGKLQF	TGTGTGGTGAGCCTAACTGACAGCTGGGGGAAATTGCAGTTT	:::::::::0:-1:12:::::14:-4:42:::	CD8
1045	TGTGCCGTGAACGTAAATGGTCAGAATTTTGTCTTT	TRAV12-2	0	TRAJ26	TRAV12	TRAJ26	CAVNVNGQNFVF	TGTGCCGTGAACGTAAATGGTCAGAATTTTGTCTTT	:::::::::0:-1:12:::::16:-9:36:::	CD8
1046	TGTGCCGTTACAGGAACCTACAAATACATCTTT	TRAV12-2	0	TRAJ40	TRAV12	TRAJ40	CAVTGTYKYIF	TGTGCCGTTACAGGAACCTACAAATACATCTTT	:::::::::0:-5:8:::::10:-7:33:::	CD8
1047	TGCATCCTGAGTCGTAGCAACTATCAGTTAATCTGG	TRAV26-2	0	TRAJ33	TRAV26	TRAJ33	CILSRSNYQLIW	TGCATCCTGAGTCGTAGCAACTATCAGTTAATCTGG	:::::::::0:-4:11:::::14:-4:36:::	CD8
1048	TGTGCTCTGAGTGAGGCGGGGGATAACACCGACAAGCTCATCTTT	TRAV19	0	TRAJ34	TRAV19	TRAJ34	CALSEAGDNTDKLIF	TGTGCTCTGAGTGAGGCGGGGGATAACACCGACAAGCTCATCTTT	:::::::::0:0:17:::::22:-4:45:::	CD8
1049	TGTGCAGCAAGTACAGACGAGGAATATGGAAACAAACTGGTCTTT	TRAV13-1	0	TRAJ47	TRAV13	TRAJ47	CAASTDEEYGNKLVF	TGTGCAGCAAGTACAGACGAGGAATATGGAAACAAACTGGTCTTT	:::::::::0:0:13:::::20:-1:45:::	CD8
1050	TGTGCAGGGCCCCTGGAGGCTTCAAAACTATCTTT	TRAV13-1	0	TRAJ9	TRAV13	TRAJ9	CAGPLE_FKTIF	TGTGCAGGGCCCCTGGAGGCTTCAAAACTATCTTT	:::::::::0:-6:7:::::12:-7:35:::	CD8
1051	TGTGTGGTACGAGGGGGAAGCTACATACCTACATTT	TRAV12-1	0	TRAJ6	TRAV12	TRAJ6	CVVRGGSYIPTF	TGTGTGGTACGAGGGGGAAGCTACATACCTACATTT	:::::::::0:-5:8:::::11:-6:36:::	CD8
1052	TGTGCTGTGAGTTCAAGTGTTCTCAGGAACCTACAAATACATCTTT	TRAV8-4	0	TRAJ40	TRAV8	TRAJ40	CAVSSSVL_GTYKYIF	TGTGCTGTGAGTTCAAGTGTTCTCAGGAACCTACAAATACATCTTT	:::::::::0:-2:12:::::21:-5:46:::	CD8
1053	TGTGCAGGGACTATAATTCAGGGAGCCCAGAAGCTGGTATTT	TRAV29DV5	0	TRAJ54	TRAV29	TRAJ54	CAGTIIQGAQKLVF	TGTGCAGGGACTATAATTCAGGGAGCCCAGAAGCTGGTATTT	:::::::::0:-6:7:::::11:2:42:::	CD8
1054	TGTGCAGAGAAGATGGCAACACAGGCAAACTAATCTTT	TRAV13-2	0	TRAJ37	TRAV13	TRAJ37	CAEKMA_TGKLIF	TGTGCAGAGAAGATGGCAACACAGGCAAACTAATCTTT	:::::::::0:-2:11:::::13:-6:38:::	CD4
1055	TGCATCCTGAGCCCCGGTGGTACTAGCTATGGAAAGCTGACATTT	TRAV26-2	0	TRAJ52	TRAV26	TRAJ52	CILSPGGTSYGKLTF	TGCATCCTGAGCCCCGGTGGTACTAGCTATGGAAAGCTGACATTT	:::::::::0:-4:11:::::15:-8:45:::	CD8
1056	TGTGCCGTGGGAGCCCAGAAGCTGGTATTT	TRAV12-2	0	TRAJ54	TRAV12	TRAJ54	CAVGAQKLVF	TGTGCCGTGGGAGCCCAGAAGCTGGTATTT	:::::::::0:-4:9:::::8:-7:30:::	CD8
1057	TGTGCTTTCATGATGAACAGAGATGACAAGATCATCTTT	TRAV38-1	0	TRAJ30	TRAV38	TRAJ30	CAFMMNRDDKIIF	TGTGCTTTCATGATGAACAGAGATGACAAGATCATCTTT	:::::::::0:-4:13:::::12:1:39:::	CD8
1058	TGTGCAGGAGCTCGACGGACCGGTAACCAGTTCTATTTT	TRAV27	0	TRAJ49	TRAV27	TRAJ49	CAGARRTGNQFYF	TGTGCAGGAGCTCGACGGACCGGTAACCAGTTCTATTTT	:::::::::0:0:10:::::18:-4:39:::	CD8
1059	TGTGCTGCCTACGGTTCTAACGACTACAAGCTCAGCTTT	TRAV21	0	TRAJ20	TRAV21	TRAJ20	CAAYGSNDYKLSF	TGTGCTGCCTACGGTTCTAACGACTACAAGCTCAGCTTT	:::::::::0:-5:7:::::13:0:39:::	CD4
1060	TGTGCTTATACAAACCTTAACACCGACAAGCTCATCTTT	TRAV38-2DV8	0	TRAJ34	TRAV38	TRAJ34	CAYTNLNTDKLIF	TGTGCTTATACAAACCTTAACACCGACAAGCTCATCTTT	:::::::::0:-6:10:::::17:-5:39:::	CD8
1061	TGTGCAGAGAATAGAGGTCGCCAGAAGCTGCTCTTT	TRAV13-2	0	TRAJ16	TRAV13	TRAJ16	CAENRGRQKLLF	TGTGCAGAGAATAGAGGTCGCCAGAAGCTGCTCTTT	:::::::::0:0:13:::::19:-12:36:::	CD4
1062	TGTCTTCTGGGAGATCCTAGCTCAGGAACCTACAAATACATCTTT	TRAV40	0	TRAJ40	TRAV40	TRAJ40	CLLGDPSSGTYKYIF	TGTCTTCTGGGAGATCCTAGCTCAGGAACCTACAAATACATCTTT	:::::::::0:0:14:::::16:-1:45:::	CD8
1063	TGTGCAGCAAGCGCCGATGGAGGAAGCCAAGGAAATCTCATCTTT	TRAV29DV5	0	TRAJ42	TRAV29	TRAJ42	CAASADGGSQGNLIF	TGTGCAGCAAGCGCCGATGGAGGAAGCCAAGGAAATCTCATCTTT	:::::::::0:0:13:::::16:-6:45:::	CD8
1064	TCAATCCTTGGCTCTAGCAACACAGGCAAACTAATCTTT	TRAV27	0	TRAJ37	TRAV27	TRAJ37	SILGSSNTGKLIF	TCAATCCTTGGCTCTAGCAACACAGGCAAACTAATCTTT	:::::::::0:-9:1:::::5:3:39:::	CD8
1065	TGTGCAGAGAAAGGAGCGGGAGGAGGAAACAAACTCACCTTT	TRAV13-2	0	TRAJ10	TRAV13	TRAJ10	CAEKGAGGGNKLTF	TGTGCAGAGAAAGGAGCGGGAGGAGGAAACAAACTCACCTTT	:::::::::0:-2:11:::::16:-7:42:::	CD8
1066	TGTGCTTATAGGAGCCCTAACATGGATAGCAACTATCAGTTAATCTGG	TRAV38-2DV8	0	TRAJ33	TRAV38	TRAJ33	CAYRSPNMDSNYQLIW	TGTGCTTATAGGAGCCCTAACATGGATAGCAACTATCAGTTAATCTGG	:::::::::0:-1:15:::::20:2:48:::	CD8
1067	TGTGCCCCCCGCGTCAACCAGGCAGGAACTGCTCTGATCTTT	TRAV24	0	TRAJ15	TRAV24	TRAJ15	CAPRVNQAGTALIF	TGTGCCCCCCGCGTCAACCAGGCAGGAACTGCTCTGATCTTT	:::::::::0:-4:6:::::14:-1:42:::	CD8
1068	TGTGCAGAGACCCCTTATAACACCGACAAGCTCATCTTT	TRAV13-2	0	TRAJ34	TRAV13	TRAJ34	CAETPYNTDKLIF	TGTGCAGAGACCCCTTATAACACCGACAAGCTCATCTTT	:::::::::0:-3:10:::::13:-1:39:::	CD8
1069	TGTGCCGTGATTCACGACAAGCTCATCTTT	TRAV12-2	0	TRAJ34	TRAV12	TRAJ34	CAVIHDKLIF	TGTGCCGTGATTCACGACAAGCTCATCTTT	:::::::::0:-3:10:::::14:-11:30:::	CD8
1070	TGTGCTTATAGGAGCGTTACCTCAGGAACCTACAAATACATCTTT	TRAV38-2DV8	0	TRAJ40	TRAV38	TRAJ40	CAYRSVTSGTYKYIF	TGTGCTTATAGGAGCGTTACCTCAGGAACCTACAAATACATCTTT	:::::::::0:0:16:::::17:-2:45:::	CD4
1071	TGTGCAGCAACCTCGGGGGGCTCTGCAAGGCAACTGACCTTT	TRAV13-1	0	TRAJ22	TRAV13	TRAJ22	CAATSGGSARQLTF	TGTGCAGCAACCTCGGGGGGCTCTGCAAGGCAACTGACCTTT	:::::::::0:-3:10:::::18:-8:42:::	CD4
1072	TGTGCAGCAACCTACATGGAATATGGAAACAAACTGGTCTTT	TRAV13-1	0	TRAJ47	TRAV13	TRAJ47	CAATYMEYGNKLVF	TGTGCAGCAACCTACATGGAATATGGAAACAAACTGGTCTTT	:::::::::0:-3:10:::::14:2:42:::	CD8
1073	TGCGCTGTGAGCCTAGGGTACAGCAGTGCTTCCAAGATAATCTTT	TRAV1-1	0	TRAJ3	TRAV1	TRAJ3	CAVSLGYSSASKIIF	TGCGCTGTGAGCCTAGGGTACAGCAGTGCTTCCAAGATAATCTTT	:::::::::0:-3:11:::::3:10:45:::	CD8
1074	TGTGCAATGACTGGTGGCTACAATAAGCTGATTTTT	TRAV12-3	0	TRAJ4	TRAV12	TRAJ4	CAMTGGYNKLIF	TGTGCAATGACTGGTGGCTACAATAAGCTGATTTTT	:::::::::0:-3:10:::::10:-6:36:::	CD4
1075	TGTGCTACGGACGCGTCGGGAGCCCAGAAGCTGGTATTT	TRAV17	0	TRAJ54	TRAV17	TRAJ54	CATDASGAQKLVF	TGTGCTACGGACGCGTCGGGAGCCCAGAAGCTGGTATTT	:::::::::0:0:13:::::17:-7:39:::	CD8
1076	TGTGCCGGAGGGGATGACAAGATCATCTTT	TRAV12-2	0	TRAJ30	TRAV12	TRAJ30	CAGGDDKIIF	TGTGCCGGAGGGGATGACAAGATCATCTTT	:::::::::0:-6:7:::::12:-8:30:::	CD8
1077	TGTGCCGTGGCCGATGACAAGATCATCTTT	TRAV12-2	0	TRAJ30	TRAV12	TRAJ30	CAVADDKIIF	TGTGCCGTGGCCGATGACAAGATCATCTTT	:::::::::0:-4:9:::::12:-8:30:::	CD8
1078	TGTGTGGTGAACATGGAATTCCGGGCCAGACTCATGTTT	TRAV12-1	0	TRAJ31	TRAV12	TRAJ31	CVVNMEFRARLMF	TGTGTGGTGAACATGGAATTCCGGGCCAGACTCATGTTT	:::::::::0:0:13:::::24:-11:39:::	CD4
1079	TGTGCTCTCCCGAATTCAGGATACAGCACCCTCACCTTT	TRAV6	0	TRAJ11	TRAV6	TRAJ11	CALPNSGYSTLTF	TGTGCTCTCCCGAATTCAGGATACAGCACCCTCACCTTT	:::::::::0:-5:8:::::11:-1:39:::	CD8
1080	TGCCTCGTGGGTGACAGGCCAGGAGGAGGTGCTGACGGACTCACCTTT	TRAV4	0	TRAJ45	TRAV4	TRAJ45	CLVGDRPGGGADGLTF	TGCCTCGTGGGTGACAGGCCAGGAGGAGGTGCTGACGGACTCACCTTT	:::::::::0:0:16:::::19:-6:48:::	CD8
1081	TGTGCTGTGTCTAATAATGCAGGCAACATGCTCACCTTT	TRAV21	0	TRAJ39	TRAV21	TRAJ39	CAVSNNAGNMLTF	TGTGCTGTGTCTAATAATGCAGGCAACATGCTCACCTTT	:::::::::0:-3:9:::::11:-4:39:::	CD4
1082	TGTGCAGTCTGTCATTCTAACGACTACAAGCTCAGCTTT	TRAV27	0	TRAJ20	TRAV27	TRAJ20	CAVCHSNDYKLSF	TGTGCAGTCTGTCATTCTAACGACTACAAGCTCAGCTTT	:::::::::0:-3:7:::::14:-1:39:::	CD8
1083	TGCGCCGGTTGGAGGGAATTCTGGGGGTTACCAGAAAGTTACCTTT	TRAV1-1	0	TRAJ13	TRAV1	TRAJ13	CAGWREFW_GYQKVTF	TGCGCCGGTTGGAGGGAATTCTGGGGGTTACCAGAAAGTTACCTTT	:::::::::0:-9:5:::::15:-1:46:::	CD8
1084	TGTGCTACGGGAGGCACCGACAAGCTCATCTTT	TRAV17	0	TRAJ34	TRAV17	TRAJ34	CATGGTDKLIF	TGTGCTACGGGAGGCACCGACAAGCTCATCTTT	:::::::::0:-3:10:::::14:-8:33:::	CD8
1085	TGTGCAGCCCGGATAAGGGGTAGCAACTATCAGTTAATCTGG	TRAV29DV5	0	TRAJ33	TRAV29	TRAJ33	CAARIRGSNYQLIW	TGTGCAGCCCGGATAAGGGGTAGCAACTATCAGTTAATCTGG	:::::::::0:-5:8:::::17:-1:42:::	CD4
1086	TGTGTTGTGAGTGGTTCGTCTGGTGGCTACAATAAGCTGATTTTT	TRAV8-2	0	TRAJ4	TRAV8	TRAJ4	CVVSGSSGGYNKLIF	TGTGTTGTGAGTGGTTCGTCTGGTGGCTACAATAAGCTGATTTTT	:::::::::0:-1:13:::::18:-5:45:::	CD4
1087	TGTGCAGCAAGTCCCCTCTCAGGAACCTACAAATACATCTTT	TRAV13-1	0	TRAJ40	TRAV13	TRAJ40	CAASPLSGTYKYIF	TGTGCAGCAAGTCCCCTCTCAGGAACCTACAAATACATCTTT	:::::::::0:-1:12:::::17:-5:42:::	CD4
1088	TGTGCAGCAATACGTACTACCTCAGGAACCTACAAATACATCTTT	TRAV29DV5	0	TRAJ40	TRAV29	TRAJ40	CAAIRTTSGTYKYIF	TGTGCAGCAATACGTACTACCTCAGGAACCTACAAATACATCTTT	:::::::::0:-3:10:::::13:2:45:::	CD4
1089	TGCGCTGTGAGAGATGTTGGGTGAACAAGGATAGCAACTATCAGTTAATCTGG	TRAV1-1	0	TRAJ33	TRAV1	TRAJ33	CAVRDVG*T_DSNYQLIW	TGCGCTGTGAGAGATGTTGGGTGAACAAGGATAGCAACTATCAGTTAATCTGG	:::::::::0:0:14:::::25:2:53:::	CD8
1090	TGTGCTACGGACCGGGGGATGGATAGCAGCTATAAATTGATCTTC	TRAV17	0	TRAJ12	TRAV17	TRAJ12	CATDRGMDSSYKLIF	TGTGCTACGGACCGGGGGATGGATAGCAGCTATAAATTGATCTTC	:::::::::0:-1:12:::::16:0:45:::	CD8
1091	TGTGCAATGAGAGAGGCGGATAGTAACTTTGGAAATGAGAAATTAACCTTT	TRAV14DV4	0	TRAJ48	TRAV14	TRAJ48	CAMREADSNFGNEKLTF	TGTGCAATGAGAGAGGCGGATAGTAACTTTGGAAATGAGAAATTAACCTTT	:::::::::0:-1:16:::::23:-4:51:::	CD8
1092	TGTGCTCTGAGTGAGACGACTACAAGCTCAGCTTT	TRAV9-2	0	TRAJ20	TRAV9	TRAJ20	CALSET_YKLSF	TGTGCTCTGAGTGAGACGACTACAAGCTCAGCTTT	:::::::::0:0:14:::::15:-6:35:::	CD8
1093	TGTGCTGTGAGTCCCCAGGGGAAGGCAGGAACTGCTCTGATCTTT	TRAV8-4	0	TRAJ15	TRAV8	TRAJ15	CAVSPQGKAGTALIF	TGTGCTGTGAGTCCCCAGGGGAAGGCAGGAACTGCTCTGATCTTT	:::::::::0:-2:12:::::22:-6:45:::	CD4
1094	TGCATCGTCAGAGTCCGGGGGGCTGGGAGTTACCAACTCACTTTC	TRAV26-1	0	TRAJ28	TRAV26	TRAJ28	CIVRVRGAGSYQLTF	TGCATCGTCAGAGTCCGGGGGGCTGGGAGTTACCAACTCACTTTC	:::::::::0:-1:15:::::18:-8:45:::	CD4
1095	TGTGCAGAGAGTATCGACACCTCAGGAACCTACAAATACATCTTT	TRAV5	0	TRAJ40	TRAV5	TRAJ40	CAESIDTSGTYKYIF	TGTGCAGAGAGTATCGACACCTCAGGAACCTACAAATACATCTTT	:::::::::0:0:13:::::18:-3:45:::	CD8
1096	TGTGCCGTGAACAGCCACAAGCTCAGCTTT	TRAV12-2	0	TRAJ20	TRAV12	TRAJ20	CAVNSHKLSF	TGTGCCGTGAACAGCCACAAGCTCAGCTTT	:::::::::0:0:13:::::16:-12:30:::	CD8
1097	TGTGCAGCAAGCAAGAGCCCTGGGGCTGGGAGTTACCAACTCACTTTC	TRAV23DV6	0	TRAJ28	TRAV23	TRAJ28	CAASKSPGAGSYQLTF	TGTGCAGCAAGCAAGAGCCCTGGGGCTGGGAGTTACCAACTCACTTTC	:::::::::0:0:13:::::19:-6:48:::	CD8
1098	TGTGGAGCTGCAGGCAACAAGCTAACTTTT	TRAV12-1	0	TRAJ17	TRAV12	TRAJ17	CGAAGNKLTF	TGTGGAGCTGCAGGCAACAAGCTAACTTTT	:::::::::0:-9:4:::::5:-7:30:::	CD8
1099	TGTGCCGTGGACGGTAACCAGTTCTATTTT	TRAV12-2	0	TRAJ49	TRAV12	TRAJ49	CAVDGNQFYF	TGTGCCGTGGACGGTAACCAGTTCTATTTT	:::::::::0:-1:12:::::11:-6:30:::	CD8
1100	TGTGCTGTCAGATCGTCCAGTGGCTCTAGGTTGACCTTT	TRAV41	0	TRAJ58	TRAV41	TRAJ58	CAVRSSSGSRLTF	TGTGCTGTCAGATCGTCCAGTGGCTCTAGGTTGACCTTT	:::::::::0:0:12:::::16:-9:39:::	CD4
1101	TGTGCTGTGAGTGATAATAGCAACTATCAGTTAATCTGG	TRAV8-6	0	TRAJ33	TRAV8	TRAJ33	CAVSDNSNYQLIW	TGTGCTGTGAGTGATAATAGCAACTATCAGTTAATCTGG	:::::::::0:0:14:::::16:-3:39:::	CD4
1102	TGCGGCACAGAGACTGTGGAATATGGAAACAAACTGGTCTTT	TRAV30	0	TRAJ47	TRAV30	TRAJ47	CGTETVEYGNKLVF	TGCGGCACAGAGACTGTGGAATATGGAAACAAACTGGTCTTT	:::::::::0:0:13:::::16:0:42:::	CD8
1103	TGTGCTGTTAGGGGTCCAAATTCCGGGTATGCACTCAACTTC	TRAV8-6	0	TRAJ41	TRAV8	TRAJ41	CAVRGPNSGYALNF	TGTGCTGTTAGGGGTCCAAATTCCGGGTATGCACTCAACTTC	:::::::::0:-3:11:::::16:-5:42:::	CD4
1104	TGTGCCGGGGCGAGCGACAAGGTGATATTT	TRAV12-2	0	TRAJ50	TRAV12	TRAJ50	CAGASDKVIF	TGTGCCGGGGCGAGCGACAAGGTGATATTT	:::::::::0:-6:7:::::14:-13:30:::	CD8
1105	TGTGCTCTGCTTTACTCTGGGGCTGGGAGTTACCAACTCACTTTC	TRAV9-2	0	TRAJ28	TRAV9	TRAJ28	CALLYSGAGSYQLTF	TGTGCTCTGCTTTACTCTGGGGCTGGGAGTTACCAACTCACTTTC	:::::::::0:-5:9:::::12:-2:45:::	CD8
1106	TGTGCCGTGAATGCAGTGGGGGCTGCAGGCAACAAGCTAACTTTT	TRAV8-1	0	TRAJ17	TRAV8	TRAJ17	CAVNAVGAAGNKLTF	TGTGCCGTGAATGCAGTGGGGGCTGCAGGCAACAAGCTAACTTTT	:::::::::0:0:14:::::21:-8:45:::	CD4
1107	TGTGCAGGAGCTCGGAGGAACAATGCCAGACTCATGTTT	TRAV27	0	TRAJ31	TRAV27	TRAJ31	CAGARRNNARLMF	TGTGCAGGAGCTCGGAGGAACAATGCCAGACTCATGTTT	:::::::::0:0:10:::::12:1:39:::	CD4
1108	TGTGCTGTGGGGCCGAACAACCTCTTCTTT	TRAV22	0	TRAJ36	TRAV22	TRAJ36	CAVGPNNLFF	TGTGCTGTGGGGCCGAACAACCTCTTCTTT	:::::::::0:0:13:::::7:-6:30:::	CD4
1109	TGTGTGGTGAACTCGGATGGCCAGAAGCTGCTCTTT	TRAV12-1	0	TRAJ16	TRAV12	TRAJ16	CVVNSDGQKLLF	TGTGTGGTGAACTCGGATGGCCAGAAGCTGCTCTTT	:::::::::0:-1:12:::::12:-5:36:::	CD8
1110	TGTGCCGTCGAAGCTTCCAAGATAATCTTT	TRAV12-2	0	TRAJ3	TRAV12	TRAJ3	CAVEASKIIF	TGTGCCGTCGAAGCTTCCAAGATAATCTTT	:::::::::0:-2:12:::::12:-13:30:::	CD8
1111	TGTGCTGGTCCATCCCGGGCCAACAATGACATGCGCTTT	TRAV21	0	TRAJ43	TRAV21	TRAJ43	CAGPSRANNDMRF	TGTGCTGGTCCATCCCGGGCCAACAATGACATGCGCTTT	:::::::::0:-5:7:::::21:-5:39:::	CD8
1112	TGTGCTGGGTACCTCCGGTTTTCAGATGGCCAGAAGCTGCTCTTT	TRAV35	0	TRAJ16	TRAV35	TRAJ16	CAGYLRFSDGQKLLF	TGTGCTGGGTACCTCCGGTTTTCAGATGGCCAGAAGCTGCTCTTT	:::::::::0:-3:9:::::14:2:45:::	CD4
1113	TGTGCTCTGTAAAGATGGCCAGAAGCTGCTCTTT	TRAV9-2	0	TRAJ16	TRAV9	TRAJ16	CAL*RW_QKLLF	TGTGCTCTGTAAAGATGGCCAGAAGCTGCTCTTT	:::::::::0:-5:9:::::12:-7:34:::	CD4
1114	TGTGCAGCAGGGGACAATAACAATGACATGCGCTTT	TRAV29DV5	0	TRAJ43	TRAV29	TRAJ43	CAAGDNNNDMRF	TGTGCAGCAGGGGACAATAACAATGACATGCGCTTT	:::::::::0:-4:9:::::13:0:36:::	CD8
1115	TGTGCTCTGAGTGAGGCGCGAAGCAGCTATAAATTGATCTTC	TRAV19	0	TRAJ12	TRAV19	TRAJ12	CALSEARSSYKLIF	TGTGCTCTGAGTGAGGCGCGAAGCAGCTATAAATTGATCTTC	:::::::::0:0:17:::::21:-8:42:::	CD4
1116	TGTGCAGCACACTTGACCTCAGGAACCTACAAATACATCTTT	TRAV29DV5	0	TRAJ40	TRAV29	TRAJ40	CAAHLTSGTYKYIF	TGTGCAGCACACTTGACCTCAGGAACCTACAAATACATCTTT	:::::::::0:-4:9:::::15:-3:42:::	CD4
1117	TGTGCAGCAAGCGACCGTAATGCTGGCAACAACCGTAAGCTGATTTGG	TRAV29DV5	0	TRAJ38	TRAV29	TRAJ38	CAASDRNAGNNRKLIW	TGTGCAGCAAGCGACCGTAATGCTGGCAACAACCGTAAGCTGATTTGG	:::::::::0:0:13:::::17:0:48:::	CD8
1118	TGCCTCGTGGGTGACCGGCCAGGAGGAGGTGCTGACGGACTCACCTTT	TRAV4	0	TRAJ45	TRAV4	TRAJ45	CLVGDRPGGGADGLTF	TGCCTCGTGGGTGACCGGCCAGGAGGAGGTGCTGACGGACTCACCTTT	:::::::::0:-1:15:::::19:-6:48:::	CD8
1119	TGTGTGGTGAACGAGGACGGTTATAACACCGACAAGCTCATCTTT	TRAV12-1	0	TRAJ34	TRAV12	TRAJ34	CVVNEDGYNTDKLIF	TGTGTGGTGAACGAGGACGGTTATAACACCGACAAGCTCATCTTT	:::::::::0:-1:12:::::20:-2:45:::	CD8
1120	TGTGCTTTCATGAGCCCCGATTATGGAGGAAGCCAAGGAAATCTCATCTTT	TRAV38-1	0	TRAJ42	TRAV38	TRAJ42	CAFMSPDYGGSQGNLIF	TGTGCTTTCATGAGCCCCGATTATGGAGGAAGCCAAGGAAATCTCATCTTT	:::::::::0:-4:13:::::19:-3:51:::	CD8
1121	TGTGCTGTTTATGAATCGAACACCGGTAACCAGTTCTATTTT	TRAV21	0	TRAJ49	TRAV21	TRAJ49	CAVYESNTGNQFYF	TGTGCTGTTTATGAATCGAACACCGGTAACCAGTTCTATTTT	:::::::::0:-4:8:::::15:2:42:::	CD8
1122	TGTGCTGTGAAGGGCGGTAACCAGTTCTATTTT	TRAV8-4	0	TRAJ49	TRAV8	TRAJ49	CAVKGGNQFYF	TGTGCTGTGAAGGGCGGTAACCAGTTCTATTTT	:::::::::0:-4:10:::::14:-6:33:::	CD8
1123	TGTGCTCTGAAGGGTAGCAACTATAAACTGACATTT	TRAV9-2	0	TRAJ53	TRAV9	TRAJ53	CALKGSNYKLTF	TGTGCTCTGAAGGGTAGCAACTATAAACTGACATTT	:::::::::0:-4:10:::::12:-11:36:::	CD4
1124	TGTGCTGTGCGGGAACCAATAACGAAGGGAGGAAGCTACATACCTACATTT	TRAV20	0	TRAJ6	TRAV20	TRAJ6	CAVREPITKGGSYIPTF	TGTGCTGTGCGGGAACCAATAACGAAGGGAGGAAGCTACATACCTACATTT	:::::::::0:0:13:::::27:-7:51:::	CD8
1125	TGTGCAGGGAGGTCCAGTGCAGGCAACATGCTCACCTTT	TRAV25	0	TRAJ39	TRAV25	TRAJ39	CAGRSSAGNMLTF	TGTGCAGGGAGGTCCAGTGCAGGCAACATGCTCACCTTT	:::::::::0:0:9:::::17:-10:39:::	CD8
1126	TGTGCTCCGCCCTTCGCCCTTTCTGGTGGCTACAATAAGCTGATTTTT	TRAV17	0	TRAJ4	TRAV17	TRAJ4	CAPPFALSGGYNKLIF	TGTGCTCCGCCCTTCGCCCTTTCTGGTGGCTACAATAAGCTGATTTTT	:::::::::0:-4:9:::::19:-3:48:::	CD8
1127	TGTGCCGTGCGTAGTACAACCGGTAACCAGTTCTATTTT	TRAV12-2	0	TRAJ49	TRAV12	TRAJ49	CAVRSTTGNQFYF	TGTGCCGTGCGTAGTACAACCGGTAACCAGTTCTATTTT	:::::::::0:-4:9:::::18:-4:39:::	CD8
1128	TGTGCCGTGTCCGATGAGAAATTAACCTTT	TRAV12-2	0	TRAJ48	TRAV12	TRAJ48	CAVSDEKLTF	TGTGCCGTGTCCGATGAGAAATTAACCTTT	:::::::::0:-4:9:::::13:-15:30:::	CD8
1129	TGTGCTGTGACCTCTATTCAGGGAGCCCAGAAGCTGGTATTT	TRAV8-6	0	TRAJ54	TRAV8	TRAJ54	CAVTSIQGAQKLVF	TGTGCTGTGACCTCTATTCAGGGAGCCCAGAAGCTGGTATTT	:::::::::0:-4:10:::::15:-2:42:::	CD4
1130	TGTGCAGGAGGGCAACGCTCTAGCAACACAGGCAAACTAATCTTT	TRAV27	0	TRAJ37	TRAV27	TRAJ37	CAGGQRSSNTGKLIF	TGTGCAGGAGGGCAACGCTCTAGCAACACAGGCAAACTAATCTTT	:::::::::0:0:10:::::16:-2:45:::	CD4
1131	TGTGCTGTGTGGGACTCAGGAACCTACAAATACATCTTT	TRAV22	0	TRAJ40	TRAV22	TRAJ40	CAVWDSGTYKYIF	TGTGCTGTGTGGGACTCAGGAACCTACAAATACATCTTT	:::::::::0:-4:9:::::14:-5:39:::	CD8
1132	TGTGCTGTCGGCCCGAATAATAATGCAGGCAACATGCTCACCTTT	TRAV21	0	TRAJ39	TRAV21	TRAJ39	CAVGPNNNAGNMLTF	TGTGCTGTCGGCCCGAATAATAATGCAGGCAACATGCTCACCTTT	:::::::::0:-4:8:::::14:-1:45:::	CD4
1133	TGTGCCGTGAACGCCAATGACATGCGCTTT	TRAV12-2	0	TRAJ43	TRAV12	TRAJ43	CAVNANDMRF	TGTGCCGTGAACGCCAATGACATGCGCTTT	:::::::::0:-1:12:::::14:-7:30:::	CD8
1134	TGTGTGGTTCCAAATTCAGGATACAGCACCCTCACCTTT	TRAV12-1	0	TRAJ11	TRAV12	TRAJ11	CVVPNSGYSTLTF	TGTGTGGTTCCAAATTCAGGATACAGCACCCTCACCTTT	:::::::::0:-5:8:::::12:-2:39:::	CD4
1135	TGTGCTGTGCAGTTCCCTAAGCGTACCTCAGGAACCTACAAATACATCTTT	TRAV20	0	TRAJ40	TRAV20	TRAJ40	CAVQFPKRTSGTYKYIF	TGTGCTGTGCAGTTCCCTAAGCGTACCTCAGGAACCTACAAATACATCTTT	:::::::::0:-1:12:::::23:-2:51:::	CD8
1136	TGTGCTGCCACATACTCTGGGGCTGGGAGTTACCAACTCACTTTC	TRAV21	0	TRAJ28	TRAV21	TRAJ28	CAATYSGAGSYQLTF	TGTGCTGCCACATACTCTGGGGCTGGGAGTTACCAACTCACTTTC	:::::::::0:-5:7:::::10:0:45:::	CD8
1137	TGTGCTCCCCGGAATGCTGGCAACAACCGTAAGCTGATTTGG	TRAV9-2	0	TRAJ38	TRAV9	TRAJ38	CAPRNAGNNRKLIW	TGTGCTCCCCGGAATGCTGGCAACAACCGTAAGCTGATTTGG	:::::::::0:-7:7:::::12:-1:42:::	CD8
1138	TGTGCAGGAGATGAAACTGGGGCAAACAACCTCTTCTTT	TRAV27	0	TRAJ36	TRAV27	TRAJ36	CAGDETGANNLFF	TGTGCAGGAGATGAAACTGGGGCAAACAACCTCTTCTTT	:::::::::0:0:10:::::9:2:39:::	CD4
1139	TGTGCAGCAAGCGACGTCCTTTTCAGCAACACAGGCAAACTAATCTTT	TRAV29DV5	0	TRAJ37	TRAV29	TRAJ37	CAASDVLFSNTGKLIF	TGTGCAGCAAGCGACGTCCTTTTCAGCAACACAGGCAAACTAATCTTT	:::::::::0:0:13:::::25:-8:48:::	CD4
1140	TGTGCAGCAAGACGGATAGCAGCTATAAATTGATCTTC	TRAV13-1	0	TRAJ12	TRAV13	TRAJ12	CAARRI_SYKLIF	TGTGCAGCAAGACGGATAGCAGCTATAAATTGATCTTC	:::::::::0:-2:11:::::10:-1:38:::	CD8
1141	TGTGCTGTGAGTGATCGGAGTGGAGGTAGCAACTATAAACTGACATTT	TRAV8-4	0	TRAJ53	TRAV8	TRAJ53	CAVSDRSGGSNYKLTF	TGTGCTGTGAGTGATCGGAGTGGAGGTAGCAACTATAAACTGACATTT	:::::::::0:0:14:::::18:-5:48:::	CD4
1142	TGCCTCGTGGGTGACAGGAGCAACACAGGCAAACTAATCTTT	TRAV4	0	TRAJ37	TRAV4	TRAJ37	CLVGDRSNTGKLIF	TGCCTCGTGGGTGACAGGAGCAACACAGGCAAACTAATCTTT	:::::::::0:0:16:::::19:-8:42:::	CD4
1143	TGTGCCGTGAGCAACTATCAGTTAATCTGG	TRAV12-2	0	TRAJ33	TRAV12	TRAJ33	CAVSNYQLIW	TGTGCCGTGAGCAACTATCAGTTAATCTGG	:::::::::0:0:13:::::9:-5:30:::	CD8
1144	TGTGCAGCAAGTATACCCGCAGGATACAGCACCCTCACCTTT	TRAV13-1	0	TRAJ11	TRAV13	TRAJ11	CAASIPAGYSTLTF	TGTGCAGCAAGTATACCCGCAGGATACAGCACCCTCACCTTT	:::::::::0:0:13:::::19:-6:42:::	CD4
1145	TGTGCTTTCGTTGGGAAGGAGGGAGCCCAGAAGCTGGTATTT	TRAV38-1	0	TRAJ54	TRAV38	TRAJ54	CAFVGKEGAQKLVF	TGTGCTTTCGTTGGGAAGGAGGGAGCCCAGAAGCTGGTATTT	:::::::::0:-8:9:::::19:-6:42:::	CD4
1146	TGTGCCTTGCGGGAGGAAGCCAAGGAAATCTCATCTTT	TRAV21	0	TRAJ42	TRAV21	TRAJ42	CALREE_QGNLIF	TGTGCCTTGCGGGAGGAAGCCAAGGAAATCTCATCTTT	:::::::::0:-7:5:::::11:-8:38:::	CD8
1147	TGTGCCGTGAACCACGACGAGCTCATCTTT	TRAV12-2	0	TRAJ34	TRAV12	TRAJ34	CAVNHDELIF	TGTGCCGTGAACCACGACGAGCTCATCTTT	:::::::::0:-1:12:::::14:-11:30:::	CD8
1148	TGTGCTACGGACGCCGTTTCTTCTGGTTCTGCAAGGCAACTGACCTTT	TRAV17	0	TRAJ22	TRAV17	TRAJ22	CATDAVSSGSARQLTF	TGTGCTACGGACGCCGTTTCTTCTGGTTCTGCAAGGCAACTGACCTTT	:::::::::0:0:13:::::16:0:48:::	CD8
1149	TGTGCCGTGTTGAATTCTGGGGGTTACCAGAAAGTTACCTTT	TRAV12-2	0	TRAJ13	TRAV12	TRAJ13	CAVLNSGGYQKVTF	TGTGCCGTGTTGAATTCTGGGGGTTACCAGAAAGTTACCTTT	:::::::::0:-4:9:::::10:0:42:::	CD8
1150	TGTGCAGAGAGTAGAGACAATAACAATGACATGCGCTTT	TRAV5	0	TRAJ43	TRAV5	TRAJ43	CAESRDNNNDMRF	TGTGCAGAGAGTAGAGACAATAACAATGACATGCGCTTT	:::::::::0:0:13:::::16:0:39:::	CD8
1151	TGTGCCGTGCGGAATGCCAGACTCATGTTT	TRAV12-2	0	TRAJ31	TRAV12	TRAJ31	CAVRNARLMF	TGTGCCGTGCGGAATGCCAGACTCATGTTT	:::::::::0:-4:9:::::12:-8:30:::	CD8
1152	TGTGCAGCAAGCGCGCTTTCGGGAGCCCAGAAGCTGGTATTT	TRAV29DV5	0	TRAJ54	TRAV29	TRAJ54	CAASALSGAQKLVF	TGTGCAGCAAGCGCGCTTTCGGGAGCCCAGAAGCTGGTATTT	:::::::::0:0:13:::::17:-3:42:::	CD4
1153	TGTGCAATGAGGGATACCGGCACTGCCAGTAAACTCACCTTT	TRAV12-3	0	TRAJ44	TRAV12	TRAJ44	CAMRDTGTASKLTF	TGTGCAATGAGGGATACCGGCACTGCCAGTAAACTCACCTTT	:::::::::0:-2:11:::::13:-3:42:::	CD8
1154	TGTGCTGTGATCCTAATTTCTTCTGGTTCTGCAAGGCAACTGACCTTT	TRAV8-4	0	TRAJ22	TRAV8	TRAJ22	CAVILISSGSARQLTF	TGTGCTGTGATCCTAATTTCTTCTGGTTCTGCAAGGCAACTGACCTTT	:::::::::0:-4:10:::::14:2:48:::	CD8
1155	TGTGCCGCTGCAGATGACAAGATCATCTTT	TRAV12-2	0	TRAJ30	TRAV12	TRAJ30	CAAADDKIIF	TGTGCCGCTGCAGATGACAAGATCATCTTT	:::::::::0:-6:7:::::11:-7:30:::	CD8
1156	TGTGCTGTGAGATCTACCTCAGGAACCTACAAATACATCTTT	TRAV8-6	0	TRAJ40	TRAV8	TRAJ40	CAVRSTSGTYKYIF	TGTGCTGTGAGATCTACCTCAGGAACCTACAAATACATCTTT	:::::::::0:-3:11:::::13:-1:42:::	CD4
1157	TGTGGCGGAACCGACAAGCTCATCTTT	TRAV9-2	0	TRAJ34	TRAV9	TRAJ34	CGGTDKLIF	TGTGGCGGAACCGACAAGCTCATCTTT	:::::::::0:-10:4:::::9:-9:27:::	CD8
1158	TGTGCGCAGGAAGATAGCAGCTATAAATTGATCTTC	TRAV12-2	0	TRAJ12	TRAV12	TRAJ12	CAQEDSSYKLIF	TGTGCGCAGGAAGATAGCAGCTATAAATTGATCTTC	:::::::::0:-8:5:::::12:-5:36:::	CD4
1159	TGTGCTACGGACGCTCTGAGCGGATCTGAAAAGCTGGTCTTT	TRAV17	0	TRAJ57	TRAV17	TRAJ57	CATDALSGSEKLVF	TGTGCTACGGACGCTCTGAGCGGATCTGAAAAGCTGGTCTTT	:::::::::0:0:13:::::13:-3:42:::	CD4
1160	TGTGCCTACTATGGTCAGAATTTTGTCTTT	TRAV8-6	0	TRAJ26	TRAV8	TRAJ26	CAYYGQNFVF	TGTGCCTACTATGGTCAGAATTTTGTCTTT	:::::::::0:-9:5:::::7:-6:30:::	CD8
1161	TGCGGCACAGAGGACCCAGGAAACACACCTCTTGTCTTT	TRAV30	0	TRAJ29	TRAV30	TRAJ29	CGTEDPGNTPLVF	TGCGGCACAGAGGACCCAGGAAACACACCTCTTGTCTTT	:::::::::0:-1:12:::::16:-6:39:::	CD4
1162	TGTGCAGCAAGTGGGGACTGGTGGCTACAATAAGCTGATTTTT	TRAV13-1	0	TRAJ4	TRAV13	TRAJ4	CAASGDW_GYNKLIF	TGTGCAGCAAGTGGGGACTGGTGGCTACAATAAGCTGATTTTT	:::::::::0:-1:12:::::17:-6:43:::	CD8
1163	TGTGCCTTCGATGGTCAGAATTTTGTCTTT	TRAV12-2	0	TRAJ26	TRAV12	TRAJ26	CAFDGQNFVF	TGTGCCTTCGATGGTCAGAATTTTGTCTTT	:::::::::0:-7:6:::::10:-9:30:::	CD8
1164	TGTGCCGTGACCCTATCTAACTTTGGAAATGAGAAATTAACCTTT	TRAV12-2	0	TRAJ48	TRAV12	TRAJ48	CAVTLSNFGNEKLTF	TGTGCCGTGACCCTATCTAACTTTGGAAATGAGAAATTAACCTTT	:::::::::0:-3:10:::::13:0:45:::	CD4
1165	TGTGCAGCAAGTATAGGTTCAGATGGCCAGAAGCTGCTCTTT	TRAV13-1	0	TRAJ16	TRAV13	TRAJ16	CAASIGSDGQKLLF	TGTGCAGCAAGTATAGGTTCAGATGGCCAGAAGCTGCTCTTT	:::::::::0:0:13:::::17:-4:42:::	CD4
1166	TGTGCTGTGGATCTCCATAATGCAGGCAACATGCTCACCTTT	TRAV22	0	TRAJ39	TRAV22	TRAJ39	CAVDLHNAGNMLTF	TGTGCTGTGGATCTCCATAATGCAGGCAACATGCTCACCTTT	:::::::::0:-2:11:::::16:-6:42:::	CD8
1167	TGTGCTACGGACGGGACCAGTGGCTCTAGGTTGACCTTT	TRAV17	0	TRAJ58	TRAV17	TRAJ58	CATDGTSGSRLTF	TGTGCTACGGACGGGACCAGTGGCTCTAGGTTGACCTTT	:::::::::0:0:13:::::15:-8:39:::	CD8
1168	TGCATCCTGGATGCAGGCAACATGCTCACCTTT	TRAV26-2	0	TRAJ39	TRAV26	TRAJ39	CILDAGNMLTF	TGCATCCTGGATGCAGGCAACATGCTCACCTTT	:::::::::0:-6:9:::::10:-9:33:::	CD8
1169	TGCCTCGTGGGTGACCTTCACGGGAGGAGGAAACAAACTCACCTTT	TRAV4	0	TRAJ10	TRAV4	TRAJ10	CLVGDLHG_GGNKLTF	TGCCTCGTGGGTGACCTTCACGGGAGGAGGAAACAAACTCACCTTT	:::::::::0:-1:15:::::17:-4:46:::	CD8
1170	TGTGCTCTAAGTGGCGATAACACCGACAAGCTCATCTTT	TRAV16	0	TRAJ34	TRAV16	TRAJ34	CALSGDNTDKLIF	TGTGCTCTAAGTGGCGATAACACCGACAAGCTCATCTTT	:::::::::0:0:14:::::16:-4:39:::	CD8
1171	TGTGCCGTGATGGGGGTAGGCTTTGGGAATGTGCTGCATTGC	TRAV8-1	0	TRAJ35	TRAV8	TRAJ35	CAVMGVGFGNVLHC	TGTGCCGTGATGGGGGTAGGCTTTGGGAATGTGCTGCATTGC	:::::::::0:-4:10:::::16:-2:42:::	CD4
1172	TGTGCAGGAGCGTACTACAATAACAATGACATGCGCTTT	TRAV27	0	TRAJ43	TRAV27	TRAJ43	CAGAYYNNNDMRF	TGTGCAGGAGCGTACTACAATAACAATGACATGCGCTTT	:::::::::0:0:10:::::15:1:39:::	CD8
1173	TGTGCTGTGCCCGGAGCCCTAAATGCTGGTGGTACTAGCTATGGAAAGCTGACATTT	TRAV21	0	TRAJ52	TRAV21	TRAJ52	CAVPGALNAGGTSYGKLTF	TGTGCTGTGCCCGGAGCCCTAAATGCTGGTGGTACTAGCTATGGAAAGCTGACATTT	:::::::::0:-3:9:::::21:-2:57:::	CD8
1174	TGTGCTGTGCGGGTGTCTTACAACAATGACATGCGCTTT	TRAV20	0	TRAJ43	TRAV20	TRAJ43	CAVRVSYNNDMRF	TGTGCTGTGCGGGTGTCTTACAACAATGACATGCGCTTT	:::::::::0:0:13:::::21:-5:39:::	CD8
1175	TGTGCAGGTGCCGATGTGGGCGACTACAAGCTCAGCTTT	TRAV27	0	TRAJ20	TRAV27	TRAJ20	CAGADVGDYKLSF	TGTGCAGGTGCCGATGTGGGCGACTACAAGCTCAGCTTT	:::::::::0:-2:8:::::20:-7:39:::	CD8
1176	TGTGCTGCCCCCGCGTACACCAATGCAGGCAAATCAACCTTT	TRAV20	0	TRAJ27	TRAV20	TRAJ27	CAAPAYTNAGKSTF	TGTGCTGCCCCCGCGTACACCAATGCAGGCAAATCAACCTTT	:::::::::0:-6:7:::::16:-2:42:::	CD8
1177	TGTGCAGCTTTCGCCCCTAGGGCTGGGAGTTACCAACTCACTTTC	TRAV29DV5	0	TRAJ28	TRAV29	TRAJ28	CAAFAPRAGSYQLTF	TGTGCAGCTTTCGCCCCTAGGGCTGGGAGTTACCAACTCACTTTC	:::::::::0:-5:8:::::16:-6:45:::	CD4
1178	TGTGCCGTGAACCTGGAGACTGACAGCTGGGGGAAATTGCAGTTT	TRAV12-2	0	TRAJ24	TRAV12	TRAJ24	CAVNLETDSWGKLQF	TGTGCCGTGAACCTGGAGACTGACAGCTGGGGGAAATTGCAGTTT	:::::::::0:-1:12:::::18:-5:45:::	CD8
1179	TGTGCTGTCATATCTGGTGGTACTAGCTATGGAAAGCTGACATTT	TRAV22	0	TRAJ52	TRAV22	TRAJ52	CAVISGGTSYGKLTF	TGTGCTGTCATATCTGGTGGTACTAGCTATGGAAAGCTGACATTT	:::::::::0:-5:8:::::13:-6:45:::	CD8
1180	TGTGCAATGAGAGATGACTTTACGGGAGGAGGAAACAAACTCACCTTT	TRAV14DV4	0	TRAJ10	TRAV14	TRAJ10	CAMRDDFTGGGNKLTF	TGTGCAATGAGAGATGACTTTACGGGAGGAGGAAACAAACTCACCTTT	:::::::::0:-3:14:::::21:-6:48:::	CD8
1181	TGTGCCGCTTCCTTCTCTAACGACTACAAGCTCAGCTTT	TRAV12-2	0	TRAJ20	TRAV12	TRAJ20	CAASFSNDYKLSF	TGTGCCGCTTCCTTCTCTAACGACTACAAGCTCAGCTTT	:::::::::0:-6:7:::::15:-2:39:::	CD8
1182	TGTGCCGCCGCAGATGACAAGATCATCTTT	TRAV12-2	0	TRAJ30	TRAV12	TRAJ30	CAAADDKIIF	TGTGCCGCCGCAGATGACAAGATCATCTTT	:::::::::0:-6:7:::::11:-7:30:::	CD8
1183	TGTGCAGGAGGTATTATAACCGGTAACCAGTTCTATTTT	TRAV27	0	TRAJ49	TRAV27	TRAJ49	CAGGIITGNQFYF	TGTGCAGGAGGTATTATAACCGGTAACCAGTTCTATTTT	:::::::::0:0:10:::::18:-4:39:::	CD8
1184	TGTGCAGGGTTTTATAACACCAATGCAGGCAAATCAACCTTT	TRAV27	0	TRAJ27	TRAV27	TRAJ27	CAGFYNTNAGKSTF	TGTGCAGGGTTTTATAACACCAATGCAGGCAAATCAACCTTT	:::::::::0:-2:8:::::7:7:42:::	CD8
1185	TGTGCAATGAGCGGGACTGGAGGCTTCAAAACTATCTTT	TRAV12-3	0	TRAJ9	TRAV12	TRAJ9	CAMSGTGGFKTIF	TGTGCAATGAGCGGGACTGGAGGCTTCAAAACTATCTTT	:::::::::0:0:13:::::15:-6:39:::	CD4
1186	TGTGTGGTGAAAGGAAGCTACATACCTACATTT	TRAV12-1	0	TRAJ6	TRAV12	TRAJ6	CVVKGSYIPTF	TGTGTGGTGAAAGGAAGCTACATACCTACATTT	:::::::::0:-2:11:::::11:-9:33:::	CD8
1187	TGTGCTGGCGACTACACCAATGCAGGCAAATCAACCTTT	TRAV3	0	TRAJ27	TRAV3	TRAJ27	CAGDYTNAGKSTF	TGTGCTGGCGACTACACCAATGCAGGCAAATCAACCTTT	:::::::::0:-9:7:::::13:-2:39:::	CD4
1188	TGTGCTGTTATCAGGAGGAAGCTACATACCTACATTT	TRAV21	0	TRAJ6	TRAV21	TRAJ6	CAVIRR_SYIPTF	TGTGCTGTTATCAGGAGGAAGCTACATACCTACATTT	:::::::::0:-4:8:::::9:-3:37:::	CD8
1189	TGTGTGGTGAACGGTAGGGGAAACAATGACATGCGCTTT	TRAV12-1	0	TRAJ43	TRAV12	TRAJ43	CVVNGRGNNDMRF	TGTGTGGTGAACGGTAGGGGAAACAATGACATGCGCTTT	:::::::::0:-1:12:::::21:-5:39:::	CD8
1190	TGCATCCTGAGAGACTGGTGGAATGCAGGCAACATGCTCACCTTT	TRAV26-2	0	TRAJ39	TRAV26	TRAJ39	CILRDWWNAGNMLTF	TGCATCCTGAGAGACTGGTGGAATGCAGGCAACATGCTCACCTTT	:::::::::0:0:15:::::21:-8:45:::	CD8
1191	TGTGCCGTGGGAGGCTTCAAAACTATCTTT	TRAV12-2	0	TRAJ9	TRAV12	TRAJ9	CAVGGFKTIF	TGTGCCGTGGGAGGCTTCAAAACTATCTTT	:::::::::0:-4:9:::::9:-9:30:::	CD8
1192	TGTGCTTCCGTGGGGTACAACTTCAACAAATTTTACTTT	TRAV8-6	0	TRAJ21	TRAV8	TRAJ21	CASVGYNFNKFYF	TGTGCTTCCGTGGGGTACAACTTCAACAAATTTTACTTT	:::::::::0:-8:6:::::15:0:39:::	CD8
1193	TGTGCAGGGACCTGGAGCAGCTATAAATTGATCTTC	TRAV25	0	TRAJ12	TRAV25	TRAJ12	CAGTWSSYKLIF	TGTGCAGGGACCTGGAGCAGCTATAAATTGATCTTC	:::::::::0:0:9:::::15:-8:36:::	CD8
1194	TGTGCCGCCGTGGGGGTTAGAGATGACAAGATCATCTTT	TRAV27	0	TRAJ30	TRAV27	TRAJ30	CAAVGVRDDKIIF	TGTGCCGCCGTGGGGGTTAGAGATGACAAGATCATCTTT	:::::::::0:-5:5:::::18:-5:39:::	CD8
1195	TGTGCAGGAGTTGGCGAAACCAGTGGCTCTAGGTTGACCTTT	TRAV27	0	TRAJ58	TRAV27	TRAJ58	CAGVGETSGSRLTF	TGTGCAGGAGTTGGCGAAACCAGTGGCTCTAGGTTGACCTTT	:::::::::0:0:10:::::15:-5:42:::	CD8
1196	TGTGCAGAGAGATCCCCCACCGACAAGCTCATCTTT	TRAV5	0	TRAJ34	TRAV5	TRAJ34	CAERSPTDKLIF	TGTGCAGAGAGATCCCCCACCGACAAGCTCATCTTT	:::::::::0:-2:11:::::17:-8:36:::	CD8
1197	TGTGCAGCAAGCGTCCAAGGAAACAAACTGGTCTTT	TRAV29DV5	0	TRAJ47	TRAV29	TRAJ47	CAASVQGNKLVF	TGTGCAGCAAGCGTCCAAGGAAACAAACTGGTCTTT	:::::::::0:0:13:::::18:-8:36:::	CD8
1198	TGTGCTGTGAGCGGGGGCTCAATTCAGGGAGCCCAGAAGCTGGTATTT	TRAV8-4	0	TRAJ54	TRAV8	TRAJ54	CAVSGGSIQGAQKLVF	TGTGCTGTGAGCGGGGGCTCAATTCAGGGAGCCCAGAAGCTGGTATTT	:::::::::0:-3:11:::::20:-1:48:::	CD4
1199	TGTGCCTTTATGGAAACCTCCTACGACAAGGTGATATTT	TRAV24	0	TRAJ50	TRAV24	TRAJ50	CAFMETSYDKVIF	TGTGCCTTTATGGAAACCTCCTACGACAAGGTGATATTT	:::::::::0:0:10:::::6:5:39:::	CD8
1200	TGCCTCGTGGGTGGCCCCTTCAGGAGGAGGTGCTGACGGACTCACCTTT	TRAV4	0	TRAJ45	TRAV4	TRAJ45	CLVGGPFR_GGADGLTF	TGCCTCGTGGGTGGCCCCTTCAGGAGGAGGTGCTGACGGACTCACCTTT	:::::::::0:-3:13:::::18:-4:49:::	CD8
1201	TGTGCAGCAAGTGGGGGGAACCAGGGAGGAAAGCTTATCTTC	TRAV13-1	0	TRAJ23	TRAV13	TRAJ23	CAASGGNQGGKLIF	TGTGCAGCAAGTGGGGGGAACCAGGGAGGAAAGCTTATCTTC	:::::::::0:-1:12:::::18:-8:42:::	CD4
1202	TGTGCTGTGATAGGAACCTACAAATACATCTTT	TRAV21	0	TRAJ40	TRAV21	TRAJ40	CAVIGTYKYIF	TGTGCTGTGATAGGAACCTACAAATACATCTTT	:::::::::0:-2:10:::::11:-8:33:::	CD4
1203	TGTGCCGTCTCCAACTATCAGTTAATCTGG	TRAV12-2	0	TRAJ33	TRAV12	TRAJ33	CAVSNYQLIW	TGTGCCGTCTCCAACTATCAGTTAATCTGG	:::::::::0:-5:8:::::11:-7:30:::	CD8
1204	TGTGCTGGGCAGTCCCCCTCAACAGGAGGAGGTGCTGACGGACTCACCTTT	TRAV35	0	TRAJ45	TRAV35	TRAJ45	CAGQSPSTGGGADGLTF	TGTGCTGGGCAGTCCCCCTCAACAGGAGGAGGTGCTGACGGACTCACCTTT	:::::::::0:0:12:::::22:-6:51:::	CD8
1205	TGCATCCTGAGTCCCGGGATGGATAGCAGCTATAAATTGATCTTC	TRAV26-2	0	TRAJ12	TRAV26	TRAJ12	CILSPGMDSSYKLIF	TGCATCCTGAGTCCCGGGATGGATAGCAGCTATAAATTGATCTTC	:::::::::0:-4:11:::::16:0:45:::	CD8
1206	TGTGCTGTGAGTGATCGAAAAGGCAACACAGGCAAACTAATCTTT	TRAV8-4	0	TRAJ37	TRAV8	TRAJ37	CAVSDRKGNTGKLIF	TGTGCTGTGAGTGATCGAAAAGGCAACACAGGCAAACTAATCTTT	:::::::::0:0:14:::::21:-7:45:::	CD4
1207	TGTGCAGGAGATGAAGTCAATGCCAGACTCATGTTT	TRAV27	0	TRAJ31	TRAV27	TRAJ31	CAGDEVNARLMF	TGTGCAGGAGATGAAGTCAATGCCAGACTCATGTTT	:::::::::0:0:10:::::17:-7:36:::	CD8
1208	TGCGCTGTGCTATTAGGAAGCCAAGGAAATCTCATCTTT	TRAV1-1	0	TRAJ42	TRAV1	TRAJ42	CAVLLGSQGNLIF	TGCGCTGTGCTATTAGGAAGCCAAGGAAATCTCATCTTT	:::::::::0:-5:9:::::14:-10:39:::	CD4
1209	TGTGCTGTGAGTGATCAAGGCACAGGCTTTCAGAAACTTGTATTT	TRAV8-4	0	TRAJ8	TRAV8	TRAJ8	CAVSDQGTGFQKLVF	TGTGCTGTGAGTGATCAAGGCACAGGCTTTCAGAAACTTGTATTT	:::::::::0:0:14:::::20:-4:45:::	CD4
1210	TGCCTCGTGGGTGAGGGCGGCAATGACATGCGCTTT	TRAV4	0	TRAJ43	TRAV4	TRAJ43	CLVGEGGNDMRF	TGCCTCGTGGGTGAGGGCGGCAATGACATGCGCTTT	:::::::::0:-2:14:::::20:-7:36:::	CD8
1211	TGTGCTGTGCAGGCCAGAGTACAGGCTGGCAACAACCGTAAGCTGATTTGG	TRAV20	0	TRAJ38	TRAV20	TRAJ38	CAVQARVQAGNNRKLIW	TGTGCTGTGCAGGCCAGAGTACAGGCTGGCAACAACCGTAAGCTGATTTGG	:::::::::0:0:13:::::24:-4:51:::	CD8
1212	TGTGCTTTCGTAGTATATAGCCATGACATGCGCTTT	TRAV38-1	0	TRAJ43	TRAV38	TRAJ43	CAFVVYSHDMRF	TGTGCTTTCGTAGTATATAGCCATGACATGCGCTTT	:::::::::0:-8:9:::::16:-3:36:::	CD8
1213	TGTGCCGTGAACATAGATACTGACAGCTGGGGGAAATTGCAGTTT	TRAV12-2	0	TRAJ24	TRAV12	TRAJ24	CAVNIDTDSWGKLQF	TGTGCCGTGAACATAGATACTGACAGCTGGGGGAAATTGCAGTTT	:::::::::0:0:13:::::18:-5:45:::	CD8
1214	TGCCTCGTGGGTGCCGCTAATGCTGGCAACAACCGTAAGCTGATTTGG	TRAV4	0	TRAJ38	TRAV4	TRAJ38	CLVGAANAGNNRKLIW	TGCCTCGTGGGTGCCGCTAATGCTGGCAACAACCGTAAGCTGATTTGG	:::::::::0:-3:13:::::17:0:48:::	CD4
1215	TGTGTGGTGAACTTAGCATCAGGAGGAAGCTACATACCTACATTT	TRAV12-1	0	TRAJ6	TRAV12	TRAJ6	CVVNLASGGSYIPTF	TGTGTGGTGAACTTAGCATCAGGAGGAAGCTACATACCTACATTT	:::::::::0:-1:12:::::15:-1:45:::	CD8
1216	TGTGCTGTGTGCCGTGTAAGTGCAGGCAACAAGCTAACTTTT	TRAV8-6	0	TRAJ17	TRAV8	TRAJ17	CAVCRVSAGNKLTF	TGTGCTGTGTGCCGTGTAAGTGCAGGCAACAAGCTAACTTTT	:::::::::0:-5:9:::::17:-6:42:::	CD4
1217	TGTGCTACGGACGGTTATTGGGCCAGTGGCTCTAGGTTGACCTTT	TRAV17	0	TRAJ58	TRAV17	TRAJ58	CATDGYWASGSRLTF	TGTGCTACGGACGGTTATTGGGCCAGTGGCTCTAGGTTGACCTTT	:::::::::0:0:13:::::22:-9:45:::	CD8
1218	TGTGCCGTTAGCAACTATCAGTTAATCTGG	TRAV12-2	0	TRAJ33	TRAV12	TRAJ33	CAVSNYQLIW	TGTGCCGTTAGCAACTATCAGTTAATCTGG	:::::::::0:-5:8:::::8:-4:30:::	CD8
1219	TGCATCCTGACATAGTGGAGGTAGCAACTATAAACTGACATTT	TRAV26-2	0	TRAJ53	TRAV26	TRAJ53	CILT*WR_SNYKLTF	TGCATCCTGACATAGTGGAGGTAGCAACTATAAACTGACATTT	:::::::::0:-5:10:::::11:-3:43:::	CD8
1220	TGTGCAATGAGACTCCCCTACCCGGACACGGGCAGGAGAGCACTTACTTTT	TRAV14DV4	0	TRAJ5	TRAV14	TRAJ5	CAMRLPYPDTGRRALTF	TGTGCAATGAGACTCCCCTACCCGGACACGGGCAGGAGAGCACTTACTTTT	:::::::::0:-5:12:::::23:-1:51:::	CD8
1221	TGTGCTGTGAGAGCCTTCAACCAGGCAGGAACTGCTCTGATCTTT	TRAV3	0	TRAJ15	TRAV3	TRAJ15	CAVRAFNQAGTALIF	TGTGCTGTGAGAGCCTTCAACCAGGCAGGAACTGCTCTGATCTTT	:::::::::0:-3:13:::::17:-1:45:::	CD8
1222	TGTGCCGTGCAACCTGGGGGTTACCAGAAAGTTACCTTT	TRAV12-2	0	TRAJ13	TRAV12	TRAJ13	CAVQPGGYQKVTF	TGTGCCGTGCAACCTGGGGGTTACCAGAAAGTTACCTTT	:::::::::0:-1:13:::::13:-6:39:::	CD8
1223	TGTGCCGGAGGTGCTGACGGACTCACCTTT	TRAV12-2	0	TRAJ45	TRAV12	TRAJ45	CAGGADGLTF	TGTGCCGGAGGTGCTGACGGACTCACCTTT	:::::::::0:-6:7:::::6:-11:30:::	CD8
1224	TGTGCTGTGAGGGCCCTTCACGACTACAAGCTCAGCTTT	TRAV3	0	TRAJ20	TRAV3	TRAJ20	CAVRALHDYKLSF	TGTGCTGTGAGGGCCCTTCACGACTACAAGCTCAGCTTT	:::::::::0:-5:11:::::19:-6:39:::	CD8
1225	TGTGCTTATAGGAGCCCTTTTATGGATAGCAACTATCAGTTAATCTGG	TRAV38-2DV8	0	TRAJ33	TRAV38	TRAJ33	CAYRSPFMDSNYQLIW	TGTGCTTATAGGAGCCCTTTTATGGATAGCAACTATCAGTTAATCTGG	:::::::::0:-1:15:::::21:1:48:::	CD8
1226	TGTGCCGTGTCCGACTACAAGCTCAGCTTT	TRAV12-2	0	TRAJ20	TRAV12	TRAJ20	CAVSDYKLSF	TGTGCCGTGTCCGACTACAAGCTCAGCTTT	:::::::::0:-4:9:::::11:-7:30:::	CD8
1227	TGTGCTCTGAGTGAAAACCAGTTCTATTTT	TRAV9-2	0	TRAJ49	TRAV9	TRAJ49	CALSENQFYF	TGTGCTCTGAGTGAAAACCAGTTCTATTTT	:::::::::0:0:14:::::15:-10:30:::	CD4
1228	TGTGCCTCCAGTGCTTCCAAGATAATCTTT	TRAV12-2	0	TRAJ3	TRAV12	TRAJ3	CASSASKIIF	TGTGCCTCCAGTGCTTCCAAGATAATCTTT	:::::::::0:-7:6:::::8:-9:30:::	CD8
1229	TGTGCCGTGAACAGGGCGTCTGACAGCTGGGGGAAATTGCAGTTT	TRAV12-2	0	TRAJ24	TRAV12	TRAJ24	CAVNRASDSWGKLQF	TGTGCCGTGAACAGGGCGTCTGACAGCTGGGGGAAATTGCAGTTT	:::::::::0:0:13:::::19:-6:45:::	CD8
1230	TGTGCAGGAGCGTTATCTGGGGCTGGGAGTTACCAACTCACTTTC	TRAV27	0	TRAJ28	TRAV27	TRAJ28	CAGALSGAGSYQLTF	TGTGCAGGAGCGTTATCTGGGGCTGGGAGTTACCAACTCACTTTC	:::::::::0:0:10:::::15:-5:45:::	CD8
1231	TGTGCAGCAAGGGTGACAACTGACAGCTGGGGGAAATTGCAGTTT	TRAV29DV5	0	TRAJ24	TRAV29	TRAJ24	CAARVTTDSWGKLQF	TGTGCAGCAAGGGTGACAACTGACAGCTGGGGGAAATTGCAGTTT	:::::::::0:-2:11:::::13:0:45:::	0
1232	TGTGTGGCATCACGGGACAAGATCATCTTT	TRAV12-1	0	TRAJ30	TRAV12	TRAJ30	CVASRDKIIF	TGTGTGGCATCACGGGACAAGATCATCTTT	:::::::::0:-6:7:::::15:-11:30:::	CD8
1233	TGTGCCCTCGAACCAGGAGGAAGCTACATACCTACATTT	TRAV14DV4	0	TRAJ6	TRAV14	TRAJ6	CALEPGGSYIPTF	TGTGCCCTCGAACCAGGAGGAAGCTACATACCTACATTT	:::::::::0:-12:5:::::13:-5:39:::	CD4
1234	TGTGCTGTGAGTGTCAACACCGACAAGCTCATCTTT	TRAV8-4	0	TRAJ34	TRAV8	TRAJ34	CAVSVNTDKLIF	TGTGCTGTGAGTGTCAACACCGACAAGCTCATCTTT	:::::::::0:-1:13:::::15:-6:36:::	CD4
1235	TGTGCAGGAGCTCCTAACTTTGGAAATGAGAAATTAACCTTT	TRAV27	0	TRAJ48	TRAV27	TRAJ48	CAGAPNFGNEKLTF	TGTGCAGGAGCTCCTAACTTTGGAAATGAGAAATTAACCTTT	:::::::::0:0:10:::::13:-3:42:::	CD8
1236	TGTGCTGTGAGGCTGGGGTCTAGCAACACAGGCAAACTAATCTTT	TRAV21	0	TRAJ37	TRAV21	TRAJ37	CAVRLGSSNTGKLIF	TGTGCTGTGAGGCTGGGGTCTAGCAACACAGGCAAACTAATCTTT	:::::::::0:0:12:::::15:-1:45:::	CD4
1237	TGTGCTTATAGGAGCCATACCTCAGGAACCTACAAATACATCTTT	TRAV38-2DV8	0	TRAJ40	TRAV38	TRAJ40	CAYRSHTSGTYKYIF	TGTGCTTATAGGAGCCATACCTCAGGAACCTACAAATACATCTTT	:::::::::0:-1:15:::::17:-2:45:::	CD4
1238	TGTGCTGCGCCCTCTTCAGGAAACACACCTCTTGTCTTT	TRAV21	0	TRAJ29	TRAV21	TRAJ29	CAAPSSGNTPLVF	TGTGCTGCGCCCTCTTCAGGAAACACACCTCTTGTCTTT	:::::::::0:-5:7:::::14:-4:39:::	CD4
1239	TGTGCAGGAAAACAAGAGGAAGCAAGGAGTACACAGGCAAACTAATCTTT	TRAV27	0	TRAJ37	TRAV27	TRAJ37	CAGKQEEA_EYTGKLIF	TGTGCAGGAAAACAAGAGGAAGCAAGGAGTACACAGGCAAACTAATCTTT	:::::::::0:-1:9:::::30:-11:50:::	CD8
1240	TGTGCTGTGAGTGTACTAGGGGCTGGTGGTACTAGCTATGGAAAGCTGACATTT	TRAV8-4	0	TRAJ52	TRAV8	TRAJ52	CAVSVLGAGGTSYGKLTF	TGTGCTGTGAGTGTACTAGGGGCTGGTGGTACTAGCTATGGAAAGCTGACATTT	:::::::::0:-1:13:::::21:-5:54:::	CD4
1241	CCCATGGGGCAGAAAGTTACCTTT	TRAV24	0	TRAJ13	TRAV24	TRAJ13	PMGQKVTF	CCCATGGGGCAGAAAGTTACCTTT	:::::::::0:-10:0:::::9:-17:24:::	CD8
1242	TGTGCAGCAGGGGTTCCAAGTGGAGGTAGCAACTATAAACTGACATTT	TRAV13-1	0	TRAJ53	TRAV13	TRAJ53	CAAGVPSGGSNYKLTF	TGTGCAGCAGGGGTTCCAAGTGGAGGTAGCAACTATAAACTGACATTT	:::::::::0:-4:9:::::18:-5:48:::	CD8
1243	TGTGCTCTGAGTGAGGCATCTAGGAATAACAATGCCAGACTCATGTTT	TRAV19	0	TRAJ31	TRAV19	TRAJ31	CALSEASRNNNARLMF	TGTGCTCTGAGTGAGGCATCTAGGAATAACAATGCCAGACTCATGTTT	:::::::::0:0:17:::::22:0:48:::	CD8
1244	TGTGCAGCAAGTAGGAAGGGTATTCAGGAGGAGGTGCTGACGGACTCACCTTT	TRAV13-1	0	TRAJ45	TRAV13	TRAJ45	CAASRKGIQ_GGADGLTF	TGTGCAGCAAGTAGGAAGGGTATTCAGGAGGAGGTGCTGACGGACTCACCTTT	:::::::::0:0:13:::::19:-1:53:::	CD8
1245	TGTGCTCTAAGTGGATATAGCAACTATCAGTTAATCTGG	TRAV16	0	TRAJ33	TRAV16	TRAJ33	CALSGYSNYQLIW	TGTGCTCTAAGTGGATATAGCAACTATCAGTTAATCTGG	:::::::::0:0:14:::::16:-3:39:::	CD8
1246	TGTGCAATGATCATGCGAACTGACAGCTGGGGGAAATTGCAGTTT	TRAV14DV4	0	TRAJ24	TRAV14	TRAJ24	CAMIMRTDSWGKLQF	TGTGCAATGATCATGCGAACTGACAGCTGGGGGAAATTGCAGTTT	:::::::::0:-7:10:::::10:3:45:::	CD8
1247	TGTGCCGTGAACAGAGAGACTGACAGCTGGGGGAAATTGCAGTTT	TRAV12-2	0	TRAJ24	TRAV12	TRAJ24	CAVNRETDSWGKLQF	TGTGCCGTGAACAGAGAGACTGACAGCTGGGGGAAATTGCAGTTT	:::::::::0:0:13:::::18:-5:45:::	CD8
1248	TGTGCCGTGAACAATGACAAACTGGTCTTT	TRAV12-2	0	TRAJ47	TRAV12	TRAJ47	CAVNNDKLVF	TGTGCCGTGAACAATGACAAACTGGTCTTT	:::::::::0:0:13:::::16:-12:30:::	CD8
1249	TGTGCAGCAACCTCAACTGGAGGCTTCAAAACTATCTTT	TRAV13-1	0	TRAJ9	TRAV13	TRAJ9	CAATSTGGFKTIF	TGTGCAGCAACCTCAACTGGAGGCTTCAAAACTATCTTT	:::::::::0:-3:10:::::15:-6:39:::	CD8
1250	TGTGCAGGAGCGGACTTTGGAAATGAGAAATTAACCTTT	TRAV27	0	TRAJ48	TRAV27	TRAJ48	CAGADFGNEKLTF	TGTGCAGGAGCGGACTTTGGAAATGAGAAATTAACCTTT	:::::::::0:0:10:::::13:-6:39:::	CD4
1251	TGTGCAGAGGCCCTCATGGACACGGGCAGGAGAGCACTTACTTTT	TRAV5	0	TRAJ5	TRAV5	TRAJ5	CAEALMDTGRRALTF	TGTGCAGAGGCCCTCATGGACACGGGCAGGAGAGCACTTACTTTT	:::::::::0:-4:9:::::14:2:45:::	CD8
1252	TGTGCTGTGACCCTAGGGACTGGGGCAAACAACCTCTTCTTT	TRAV8-6	0	TRAJ36	TRAV8	TRAJ36	CAVTLGTGANNLFF	TGTGCTGTGACCCTAGGGACTGGGGCAAACAACCTCTTCTTT	:::::::::0:-4:10:::::18:-4:42:::	CD4
1253	TGTGCTACGGACGCGGGAGGGGCTGGGAGTTACCAACTCACTTTC	TRAV17	0	TRAJ28	TRAV17	TRAJ28	CATDAGGAGSYQLTF	TGTGCTACGGACGCGGGAGGGGCTGGGAGTTACCAACTCACTTTC	:::::::::0:0:13:::::18:-8:45:::	CD4
1254	TGTGCCGTGAATGAGGCCCCGGCAGGAGGAAGCTACATACCTACATTT	TRAV8-1	0	TRAJ6	TRAV8	TRAJ6	CAVNEAPAGGSYIPTF	TGTGCCGTGAATGAGGCCCCGGCAGGAGGAAGCTACATACCTACATTT	:::::::::0:-1:13:::::22:-5:48:::	CD8
1255	TGTGCAGGAGAGAACAACTTCAACAAATTTTACTTT	TRAV27	0	TRAJ21	TRAV27	TRAJ21	CAGENNFNKFYF	TGTGCAGGAGAGAACAACTTCAACAAATTTTACTTT	:::::::::0:0:10:::::13:-1:36:::	CD8
1256	TGTGCTGTGAGTGCCGTCAACACAGGCAAACTAATCTTT	TRAV8-6	0	TRAJ37	TRAV8	TRAJ37	CAVSAVNTGKLIF	TGTGCTGTGAGTGCCGTCAACACAGGCAAACTAATCTTT	:::::::::0:-1:13:::::17:-9:39:::	CD4
1257	TGTGCCGTGACGGGCGACAAGCTCATCTTT	TRAV12-2	0	TRAJ34	TRAV12	TRAJ34	CAVTGDKLIF	TGTGCCGTGACGGGCGACAAGCTCATCTTT	:::::::::0:-3:10:::::14:-11:30:::	CD8
1258	TGTGCCGTTGAGGATGACAAGATCATCTTT	TRAV12-2	0	TRAJ30	TRAV12	TRAJ30	CAVEDDKIIF	TGTGCCGTTGAGGATGACAAGATCATCTTT	:::::::::0:-5:8:::::12:-8:30:::	CD8
1259	TGCCTCGTGGGTGACATATACAACTTCAACAAATTTTACTTT	TRAV4	0	TRAJ21	TRAV4	TRAJ21	CLVGDIYNFNKFYF	TGCCTCGTGGGTGACATATACAACTTCAACAAATTTTACTTT	:::::::::0:0:16:::::16:2:42:::	CD8
1260	TGTGCTTATAGGTTAATTCAGGGAGCCCAGAAGCTGGTATTT	TRAV38-2DV8	0	TRAJ54	TRAV38	TRAJ54	CAYRLIQGAQKLVF	TGTGCTTATAGGTTAATTCAGGGAGCCCAGAAGCTGGTATTT	:::::::::0:-4:12:::::13:0:42:::	CD4
1261	TGTGCAGGAGCTCAGACCACCGGTAACCAGTTCTATTTT	TRAV27	0	TRAJ49	TRAV27	TRAJ49	CAGAQTTGNQFYF	TGTGCAGGAGCTCAGACCACCGGTAACCAGTTCTATTTT	:::::::::0:0:10:::::14:0:39:::	CD8
1262	TGTGCCTCACCCTTCACGGGAGGAGGAAACAAACTCACCTTT	TRAV24	0	TRAJ10	TRAV24	TRAJ10	CASPFTGGGNKLTF	TGTGCCTCACCCTTCACGGGAGGAGGAAACAAACTCACCTTT	:::::::::0:-3:7:::::13:-4:42:::	CD8
1263	TGTGCTGTGCAGGCCCCAAACAATGACATGCGCTTT	TRAV20	0	TRAJ43	TRAV20	TRAJ43	CAVQAPNNDMRF	TGTGCTGTGCAGGCCCCAAACAATGACATGCGCTTT	:::::::::0:0:13:::::18:-5:36:::	CD4
1264	TGTGCTCTTTCTGGATTTACCGGCACTGCCAGTAAACTCACCTTT	TRAV19	0	TRAJ44	TRAV19	TRAJ44	CALSGFTGTASKLTF	TGTGCTCTTTCTGGATTTACCGGCACTGCCAGTAAACTCACCTTT	:::::::::0:-9:8:::::17:-4:45:::	CD8
1265	TGTGCTGTCTCGGGGGGAACCTACAAATACATCTTT	TRAV8-5	0	TRAJ40	TRAV8	TRAJ40	CAVSGGTYKYIF	TGTGCTGTCTCGGGGGGAACCTACAAATACATCTTT	:::::::::0:-7:7:::::15:-9:36:::	CD8
1266	TGTGCGTCGGATTCTTTTGGAAATGAGAAATTAACCTTT	TRAV25	0	TRAJ48	TRAV25	TRAJ48	CASDSFGNEKLTF	TGTGCGTCGGATTCTTTTGGAAATGAGAAATTAACCTTT	:::::::::0:-4:5:::::15:-8:39:::	CD4
1267	TGTGCTTATAGGAGCGATGACGGTAACCAGTTCTATTTT	TRAV38-2DV8	0	TRAJ49	TRAV38	TRAJ49	CAYRSDDGNQFYF	TGTGCTTATAGGAGCGATGACGGTAACCAGTTCTATTTT	:::::::::0:0:16:::::20:-6:39:::	CD4
1268	TGTGCAGGGCCTGAGGATAGCAGCTATAAATTGATCTTC	TRAV25	0	TRAJ12	TRAV25	TRAJ12	CAGPEDSSYKLIF	TGTGCAGGGCCTGAGGATAGCAGCTATAAATTGATCTTC	:::::::::0:0:9:::::14:-4:39:::	CD8
1269	TGTGCTGCCTACTACTCTGGGGCTGGGAGTTACCAACTCACTTTC	TRAV21	0	TRAJ28	TRAV21	TRAJ28	CAAYYSGAGSYQLTF	TGTGCTGCCTACTACTCTGGGGCTGGGAGTTACCAACTCACTTTC	:::::::::0:-5:7:::::12:-2:45:::	CD8
1270	TGTGCCGTGGTCGCTTATAACACCGACAAGCTCATCTTT	TRAV39	0	TRAJ34	TRAV39	TRAJ34	CAVVAYNTDKLIF	TGTGCCGTGGTCGCTTATAACACCGACAAGCTCATCTTT	:::::::::0:-3:10:::::13:-1:39:::	CD8
1271	TGTGCAGAGAGGGTGAACACAGGCTTTCAGAAACTTGTATTT	TRAV5	0	TRAJ8	TRAV5	TRAJ8	CAERVNTGFQKLVF	TGTGCAGAGAGGGTGAACACAGGCTTTCAGAAACTTGTATTT	:::::::::0:-2:11:::::13:0:42:::	CD8
1272	TGTGCAGGAGGGGGGCTCAATAACAATGACATGCGCTTT	TRAV27	0	TRAJ43	TRAV27	TRAJ43	CAGGGLNNNDMRF	TGTGCAGGAGGGGGGCTCAATAACAATGACATGCGCTTT	:::::::::0:0:10:::::17:-1:39:::	CD8
1273	TGTGCCGTGGAGGATTCCGGGTATGCACTCAACTTC	TRAV39	0	TRAJ41	TRAV39	TRAJ41	CAVEDSGYALNF	TGTGCCGTGGAGGATTCCGGGTATGCACTCAACTTC	:::::::::0:-2:11:::::13:-8:36:::	CD8
1274	TGTGCTGTGGTGATACAGGGCGGATCTGAAAAGCTGGTCTTT	TRAV8-5	0	TRAJ57	TRAV8	TRAJ57	CAVVIQGGSEKLVF	TGTGCTGTGGTGATACAGGGCGGATCTGAAAAGCTGGTCTTT	:::::::::0:-7:7:::::15:-5:42:::	CD8
1275	TGTGCTTATAGGGTGGGTAACTTTGGAAATGAGAAATTAACCTTT	TRAV38-2DV8	0	TRAJ48	TRAV38	TRAJ48	CAYRVGNFGNEKLTF	TGTGCTTATAGGGTGGGTAACTTTGGAAATGAGAAATTAACCTTT	:::::::::0:-4:12:::::17:-4:45:::	CD4
1276	TGTGCTACGGACGCAAGGTTCGGTAACCAGTTCTATTTT	TRAV17	0	TRAJ49	TRAV17	TRAJ49	CATDARFGNQFYF	TGTGCTACGGACGCAAGGTTCGGTAACCAGTTCTATTTT	:::::::::0:0:13:::::20:-6:39:::	CD8
1277	TGTGCCCCCACAACTGACAGCTGGGGGAAATTGCAGTTT	TRAV38-1	0	TRAJ24	TRAV38	TRAJ24	CAPTTDSWGKLQF	TGTGCCCCCACAACTGACAGCTGGGGGAAATTGCAGTTT	:::::::::0:-12:5:::::9:-2:39:::	CD8
1278	TGTGCTTTCATGAAGCATGACGCGGGAGCCCAGAAGCTGGTATTT	TRAV38-1	0	TRAJ54	TRAV38	TRAJ54	CAFMKHDAGAQKLVF	TGTGCTTTCATGAAGCATGACGCGGGAGCCCAGAAGCTGGTATTT	:::::::::0:0:17:::::23:-7:45:::	CD4
1279	TGTGCTACGGCCTCGGAACTCGGTAACCAGTTCTATTTT	TRAV17	0	TRAJ49	TRAV17	TRAJ49	CATASELGNQFYF	TGTGCTACGGCCTCGGAACTCGGTAACCAGTTCTATTTT	:::::::::0:-3:10:::::20:-6:39:::	CD8
1280	TGTGCTGTGAGTTCACTTTCTGGTGGCTACAATAAGCTGATTTTT	TRAV8-6	0	TRAJ4	TRAV8	TRAJ4	CAVSSLSGGYNKLIF	TGTGCTGTGAGTTCACTTTCTGGTGGCTACAATAAGCTGATTTTT	:::::::::0:-2:12:::::16:-3:45:::	CD4
1281	TGTGCCCGACGTGTAGGTGCAGGCAACATGCTCACCTTT	TRAV24	0	TRAJ39	TRAV24	TRAJ39	CARRVGAGNMLTF	TGTGCCCGACGTGTAGGTGCAGGCAACATGCTCACCTTT	:::::::::0:-4:6:::::17:-10:39:::	CD8
1282	TGTGTGGTGAGCCCCTGGGCTTTGATGGATAGCAGCTATAAATTGATCTTC	TRAV10	0	TRAJ12	TRAV10	TRAJ12	CVVSPWALMDSSYKLIF	TGTGTGGTGAGCCCCTGGGCTTTGATGGATAGCAGCTATAAATTGATCTTC	:::::::::0:-1:12:::::23:-1:51:::	CD8
1283	TGTGTGGTGCCTTCTTCAGGAACCTACAAATACATCTTT	TRAV12-1	0	TRAJ40	TRAV12	TRAJ40	CVVPSSGTYKYIF	TGTGTGGTGCCTTCTTCAGGAACCTACAAATACATCTTT	:::::::::0:-4:9:::::15:-6:39:::	CD4
1284	TGTGCCCTTTATTCTGGGGGTTACCAGAAAGTTACCTTT	TRAV12-2	0	TRAJ13	TRAV12	TRAJ13	CALYSGGYQKVTF	TGTGCCCTTTATTCTGGGGGTTACCAGAAAGTTACCTTT	:::::::::0:-7:6:::::10:-3:39:::	CD8
1285	TGTGCAGCCCCGCCCCCCAACCAGGCAGGAACTGCTCTGATCTTT	TRAV23DV6	0	TRAJ15	TRAV23	TRAJ15	CAAPPPNQAGTALIF	TGTGCAGCCCCGCCCCCCAACCAGGCAGGAACTGCTCTGATCTTT	:::::::::0:-5:8:::::16:0:45:::	CD8
1286	TGTGCTTTCCCGGACGGGGATAGCCAAGGAAATCTCATCTTT	TRAV38-2DV8	0	TRAJ42	TRAV38	TRAJ42	CAFPDGDSQGNLIF	TGTGCTTTCCCGGACGGGGATAGCCAAGGAAATCTCATCTTT	:::::::::0:-9:7:::::17:-11:42:::	CD4
1287	TGTGCTGTCCCACCTAGCAACACAGGCAAACTAATCTTT	TRAV20	0	TRAJ37	TRAV20	TRAJ37	CAVPPSNTGKLIF	TGTGCTGTCCCACCTAGCAACACAGGCAAACTAATCTTT	:::::::::0:-5:8:::::13:-5:39:::	CD4
1288	TGTGCTTTCGTCGGGGCGGTCAATGCAGGCAACATGCTCACCTTT	TRAV38-1	0	TRAJ39	TRAV38	TRAJ39	CAFVGAVNAGNMLTF	TGTGCTTTCGTCGGGGCGGTCAATGCAGGCAACATGCTCACCTTT	:::::::::0:-8:9:::::21:-8:45:::	CD8
1289	TGCATCGTCAGAGTCAGGGGGGCTGGGAGTTACCAACTCACTTTC	TRAV26-1	0	TRAJ28	TRAV26	TRAJ28	CIVRVRGAGSYQLTF	TGCATCGTCAGAGTCAGGGGGGCTGGGAGTTACCAACTCACTTTC	:::::::::0:-1:15:::::18:-8:45:::	CD4
1290	TGTGCCGTGGAAGCAGGCAAATCAACCTTT	TRAV12-2	0	TRAJ27	TRAV12	TRAJ27	CAVEAGKSTF	TGTGCCGTGGAAGCAGGCAAATCAACCTTT	:::::::::0:-4:9:::::12:-10:30:::	CD8
1291	TGTGCAGCAGTGGGATGTATTCAGGAGGAGGTGCTGACGGACTCACCTTT	TRAV13-1	0	TRAJ45	TRAV13	TRAJ45	CAAVGCIQ_GGADGLTF	TGTGCAGCAGTGGGATGTATTCAGGAGGAGGTGCTGACGGACTCACCTTT	:::::::::0:-4:9:::::14:1:50:::	CD8
1292	TGCATCCTGAGAGACGGCAATGCAGGCAAATCAACCTTT	TRAV26-2	0	TRAJ27	TRAV26	TRAJ27	CILRDGNAGKSTF	TGCATCCTGAGAGACGGCAATGCAGGCAAATCAACCTTT	:::::::::0:0:15:::::17:-6:39:::	CD4
1293	TGTGCGTAAATGAACAGAGATGACAAGATCATCTTT	TRAV13-1	0	TRAJ30	TRAV13	TRAJ30	CA*MNRDDKIIF	TGTGCGTAAATGAACAGAGATGACAAGATCATCTTT	:::::::::0:-8:5:::::9:1:36:::	CD4
1294	TGTGCCGTGGAAGATCCGAAGGGCGGATCTGAAAAGCTGGTCTTT	TRAV39	0	TRAJ57	TRAV39	TRAJ57	CAVEDPKGGSEKLVF	TGTGCCGTGGAAGATCCGAAGGGCGGATCTGAAAAGCTGGTCTTT	:::::::::0:-2:11:::::19:-6:45:::	CD8
1295	TGTGCCTCATTTCTGGTTCTGCAAGGCAACTGACCTTT	TRAV24	0	TRAJ22	TRAV24	TRAJ22	CASFLV_ARQLTF	TGTGCCTCATTTCTGGTTCTGCAAGGCAACTGACCTTT	:::::::::0:-3:7:::::10:-4:38:::	CD4
1296	TGTGCAATGAGCGATTCACTTAGGGGCCAGGCAGGAACTGCTCTGATCTTT	TRAV12-3	0	TRAJ15	TRAV12	TRAJ15	CAMSDSLRGQAGTALIF	TGTGCAATGAGCGATTCACTTAGGGGCCAGGCAGGAACTGCTCTGATCTTT	:::::::::0:0:13:::::26:-4:51:::	CD8
1297	TGTGTGGTGATAGATGACAAGATCATCTTT	TRAV12-1	0	TRAJ30	TRAV12	TRAJ30	CVVIDDKIIF	TGTGTGGTGATAGATGACAAGATCATCTTT	:::::::::0:-3:10:::::11:-7:30:::	CD8
1298	TGTGCTCTTGGGGACCCGATAAATAATAATGCAGGCAACATGCTCACCTTT	TRDV1	0	TRAJ39	TRDV1	TRAJ39	CALGDPINNNAGNMLTF	TGTGCTCTTGGGGACCCGATAAATAATAATGCAGGCAACATGCTCACCTTT	:::::::::0:-3:14:::::18:1:51:::	CD8
1299	TGTGCAGCAAGCCCTCTCTCAGGAACCTACAAATACATCTTT	TRAV29DV5	0	TRAJ40	TRAV29	TRAJ40	CAASPLSGTYKYIF	TGTGCAGCAAGCCCTCTCTCAGGAACCTACAAATACATCTTT	:::::::::0:-1:12:::::17:-5:42:::	CD4
1300	TGTGCTGTGAGAGACATCACCAATGACATGCGCTTT	TRAV3	0	TRAJ43	TRAV3	TRAJ43	CAVRDITNDMRF	TGTGCTGTGAGAGACATCACCAATGACATGCGCTTT	:::::::::0:0:16:::::20:-7:36:::	CD8
1301	TGTGCAGGAGGACGAGGAGGTAGCAACTATAAACTGACATTT	TRAV27	0	TRAJ53	TRAV27	TRAJ53	CAGGRGGSNYKLTF	TGTGCAGGAGGACGAGGAGGTAGCAACTATAAACTGACATTT	:::::::::0:0:10:::::15:-8:42:::	CD4
1302	TGTGTGGTGAGCTCTGGAACCTACAAATACATCTTT	TRAV10	0	TRAJ40	TRAV10	TRAJ40	CVVSSGTYKYIF	TGTGTGGTGAGCTCTGGAACCTACAAATACATCTTT	:::::::::0:-1:12:::::11:-5:36:::	CD8
1303	TGTGCAATGACCTTTGGTGGGAACAACAGACTCGCTTTT	TRAV12-3	0	TRAJ7	TRAV12	TRAJ7	CAMTFGGNNRLAF	TGTGCAATGACCTTTGGTGGGAACAACAGACTCGCTTTT	:::::::::0:-3:10:::::17:-6:39:::	CD4
1304	TGTGCTGTGAGAGACTACAATGCCAGACTCATGTTT	TRAV3	0	TRAJ31	TRAV3	TRAJ31	CAVRDYNARLMF	TGTGCTGTGAGAGACTACAATGCCAGACTCATGTTT	:::::::::0:-1:15:::::16:-6:36:::	CD8
1305	TGTGCAGGAGCTGGGAAGCTGCAGGCAACAAGCTAACTTTT	TRAV27	0	TRAJ17	TRAV27	TRAJ17	CAGAGKL_GNKLTF	TGTGCAGGAGCTGGGAAGCTGCAGGCAACAAGCTAACTTTT	:::::::::0:0:10:::::15:-6:41:::	CD4
1306	TGTGCTGTGAGAGACGGGGGGGTAAATAACAATGACATGCGCTTT	TRAV3	0	TRAJ43	TRAV3	TRAJ43	CAVRDGGVNNNDMRF	TGTGCTGTGAGAGACGGGGGGGTAAATAACAATGACATGCGCTTT	:::::::::0:-1:15:::::21:2:45:::	CD8
1307	TGTGCTTATGAAGGCAGTGGAGGTAGCAACTATAAACTGACATTT	TRAV38-2DV8	0	TRAJ53	TRAV38	TRAJ53	CAYEGSGGSNYKLTF	TGTGCTTATGAAGGCAGTGGAGGTAGCAACTATAAACTGACATTT	:::::::::0:-7:9:::::15:-5:45:::	CD8
1308	TGTGCTCTGAGTGAGGGCACCGACAAGCTCATCTTT	TRAV9-2	0	TRAJ34	TRAV9	TRAJ34	CALSEGTDKLIF	TGTGCTCTGAGTGAGGGCACCGACAAGCTCATCTTT	:::::::::0:0:14:::::17:-8:36:::	CD4
1309	TGTGCTGTGACAGGAGCTGGTGGTACTAGCTATGGAAAGCTGACATTT	TRAV8-6	0	TRAJ52	TRAV8	TRAJ52	CAVTGAGGTSYGKLTF	TGTGCTGTGACAGGAGCTGGTGGTACTAGCTATGGAAAGCTGACATTT	:::::::::0:-4:10:::::15:-5:48:::	CD8
1310	TGTGCTGTGACCCCAGTCTGGGGCTATGGTCAGAATTTTGTCTTT	TRAV8-4	0	TRAJ26	TRAV8	TRAJ26	CAVTPVWGYGQNFVF	TGTGCTGTGACCCCAGTCTGGGGCTATGGTCAGAATTTTGTCTTT	:::::::::0:-4:10:::::23:-7:45:::	CD8
1311	TGTGCTGGCCGTAGTACTACCTCAGGAACCTACAAATACATCTTT	TRAV35	0	TRAJ40	TRAV35	TRAJ40	CAGRSTTSGTYKYIF	TGTGCTGGCCGTAGTACTACCTCAGGAACCTACAAATACATCTTT	:::::::::0:-4:8:::::10:5:45:::	CD8
1312	TGTGTTGTGAAGGGTAATAATGCAGGCAACATGCTCACCTTT	TRAV8-2	0	TRAJ39	TRAV8	TRAJ39	CVVKGNNAGNMLTF	TGTGTTGTGAAGGGTAATAATGCAGGCAACATGCTCACCTTT	:::::::::0:-4:10:::::14:-4:42:::	CD4
1313	TGTGCTACGGACGGTCAAGGAAGCCAAGGAAATCTCATCTTT	TRAV17	0	TRAJ42	TRAV17	TRAJ42	CATDGQGSQGNLIF	TGTGCTACGGACGGTCAAGGAAGCCAAGGAAATCTCATCTTT	:::::::::0:0:13:::::17:-10:42:::	CD8
1314	TGTGCCGTCACCCCGGACAGACTCGCTTTT	TRAV12-2	0	TRAJ7	TRAV12	TRAJ7	CAVTPDRLAF	TGTGCCGTCACCCCGGACAGACTCGCTTTT	:::::::::0:-5:8:::::16:-14:30:::	CD8
1315	TGTGCTGCGGGGTTTATGGACACGGGCAGGAGAGCACTTACTTTT	TRAV21	0	TRAJ5	TRAV21	TRAJ5	CAAGFMDTGRRALTF	TGTGCTGCGGGGTTTATGGACACGGGCAGGAGAGCACTTACTTTT	:::::::::0:-5:7:::::15:1:45:::	CD4
1316	TGTGCAGAGAGCAGCGGGCAACACAGGCAAACTAATCTTT	TRAV5	0	TRAJ37	TRAV5	TRAJ37	CAESSGQ_TGKLIF	TGTGCAGAGAGCAGCGGGCAACACAGGCAAACTAATCTTT	:::::::::0:-2:11:::::16:-7:40:::	CD8
1317	TGCATCGTCAGAGTCCCTGTCTTATAACACCGACAAGCTCATCTTT	TRAV26-1	0	TRAJ34	TRAV26	TRAJ34	CIVRVPVL_NTDKLIF	TGCATCGTCAGAGTCCCTGTCTTATAACACCGACAAGCTCATCTTT	:::::::::0:-1:15:::::19:0:46:::	CD8
1318	TGTGCTGTTATTTCTTCTGGTTCTGCAAGGCAACTGACCTTT	TRAV21	0	TRAJ22	TRAV21	TRAJ22	CAVISSGSARQLTF	TGTGCTGTTATTTCTTCTGGTTCTGCAAGGCAACTGACCTTT	:::::::::0:-4:8:::::9:1:42:::	CD8
1319	TGTGCTGTGAGTGATCAGAGCAACTATCAGTTAATCTGG	TRAV8-4	0	TRAJ33	TRAV8	TRAJ33	CAVSDQSNYQLIW	TGTGCTGTGAGTGATCAGAGCAACTATCAGTTAATCTGG	:::::::::0:0:14:::::18:-5:39:::	CD4
1320	TGTGCCGTCCTAGATGACAAGATCATCTTT	TRAV12-2	0	TRAJ30	TRAV12	TRAJ30	CAVLDDKIIF	TGTGCCGTCCTAGATGACAAGATCATCTTT	:::::::::0:-5:8:::::11:-7:30:::	CD8
1321	TGTGCCGTCCTCACCGACAAGCTCATCTTT	TRAV12-2	0	TRAJ34	TRAV12	TRAJ34	CAVLTDKLIF	TGTGCCGTCCTCACCGACAAGCTCATCTTT	:::::::::0:-5:8:::::11:-8:30:::	CD8
1322	TGTGCAGGTGCTGGCACTGGGGCTGGGAGTTACCAACTCACTTTC	TRAV27	0	TRAJ28	TRAV27	TRAJ28	CAGAGTGAGSYQLTF	TGTGCAGGTGCTGGCACTGGGGCTGGGAGTTACCAACTCACTTTC	:::::::::0:-2:8:::::16:-6:45:::	CD8
1323	TGTGCAGAGATCCCCTATAACACCGACAAGCTCATCTTT	TRAV13-2	0	TRAJ34	TRAV13	TRAJ34	CAEIPYNTDKLIF	TGTGCAGAGATCCCCTATAACACCGACAAGCTCATCTTT	:::::::::0:-3:10:::::15:-3:39:::	CD8
1324	TGTGCTGTGAGCTTGATGAACAGAGATGACAAGATCATCTTT	TRAV21	0	TRAJ30	TRAV21	TRAJ30	CAVSLMNRDDKIIF	TGTGCTGTGAGCTTGATGAACAGAGATGACAAGATCATCTTT	:::::::::0:-1:11:::::12:4:42:::	CD4
1325	TGTGCTGTGGATATGACAACTGACAGCTGGGGGAAATTGCAGTTT	TRAV8-3	0	TRAJ24	TRAV8	TRAJ24	CAVDMTTDSWGKLQF	TGTGCTGTGGATATGACAACTGACAGCTGGGGGAAATTGCAGTTT	:::::::::0:-4:10:::::12:1:45:::	CD8
1326	TGTGCTGTGAGTGATCAGTATGGAAACAAACTGGTCTTT	TRAV8-4	0	TRAJ47	TRAV8	TRAJ47	CAVSDQYGNKLVF	TGTGCTGTGAGTGATCAGTATGGAAACAAACTGGTCTTT	:::::::::0:0:14:::::18:-5:39:::	CD4
1327	TGTGCCGCCGTTAATGACAAGATCATCTTT	TRAV12-2	0	TRAJ30	TRAV12	TRAJ30	CAAVNDKIIF	TGTGCCGCCGTTAATGACAAGATCATCTTT	:::::::::0:-6:7:::::13:-9:30:::	CD8
1328	TGTGCTACGGACGACCCCTATGGGAACAACAGACTCGCTTTT	TRAV17	0	TRAJ7	TRAV17	TRAJ7	CATDDPYGNNRLAF	TGTGCTACGGACGACCCCTATGGGAACAACAGACTCGCTTTT	:::::::::0:0:13:::::17:-3:42:::	CD8
1329	TGTGCTGTGTGTCGAAGAGATGACAAGATCATCTTT	TRAV21	0	TRAJ30	TRAV21	TRAJ30	CAVCRRDDKIIF	TGTGCTGTGTGTCGAAGAGATGACAAGATCATCTTT	:::::::::0:-3:9:::::15:-5:36:::	CD4
1330	TGTGCAATGAGCCGTTCTGCAAGGCAACTGACCTTT	TRAV14DV4	0	TRAJ22	TRAV14	TRAJ22	CAMSRSARQLTF	TGTGCAATGAGCCGTTCTGCAAGGCAACTGACCTTT	:::::::::0:-6:11:::::13:-9:36:::	CD4
1331	TGTGCAGCCCCCTCAAGGAATAACAATGCCAGACTCATGTTT	TRAV27	0	TRAJ31	TRAV27	TRAJ31	CAAPSRNNNARLMF	TGTGCAGCCCCCTCAAGGAATAACAATGCCAGACTCATGTTT	:::::::::0:-3:7:::::16:0:42:::	CD8
1332	TGTGCTGTCGAGGGTCTTTCAGGAGGAGGTGCTGACGGACTCACCTTT	TRAV21	0	TRAJ45	TRAV21	TRAJ45	CAVEGLSGGGADGLTF	TGTGCTGTCGAGGGTCTTTCAGGAGGAGGTGCTGACGGACTCACCTTT	:::::::::0:0:13:::::17:-4:48:::	CD4
1333	TGTGCTGTGGTAGCGGGGAACACACCTCTTGTCTTT	TRAV8-3	0	TRAJ29	TRAV8	TRAJ29	CAVVAGNTPLVF	TGTGCTGTGGTAGCGGGGAACACACCTCTTGTCTTT	:::::::::0:-4:10:::::15:-8:36:::	CD8
1334	TGTGCTGTGAGCCTCCCCGGTAGCAACTATCAGTTAATCTGG	TRAV8-4	0	TRAJ33	TRAV8	TRAJ33	CAVSLPGSNYQLIW	TGTGCTGTGAGCCTCCCCGGTAGCAACTATCAGTTAATCTGG	:::::::::0:-3:11:::::20:-4:42:::	CD4
1335	TGCATCGTCAGAGTCGTGGGGGCTGGGAGTTACCAACTCACTTTC	TRAV26-1	0	TRAJ28	TRAV26	TRAJ28	CIVRVVGAGSYQLTF	TGCATCGTCAGAGTCGTGGGGGCTGGGAGTTACCAACTCACTTTC	:::::::::0:0:16:::::18:-8:45:::	CD4
1336	TGTGTGGTGAACGAGAACTCAGGAACCTACAAATACATCTTT	TRAV12-1	0	TRAJ40	TRAV12	TRAJ40	CVVNENSGTYKYIF	TGTGTGGTGAACGAGAACTCAGGAACCTACAAATACATCTTT	:::::::::0:-1:12:::::17:-5:42:::	CD4
1337	TGTGCTGTGAGGGGGGAAGGAGGTAGCAACTATAAACTGACATTT	TRAV8-4	0	TRAJ53	TRAV8	TRAJ53	CAVRGEGGSNYKLTF	TGTGCTGTGAGGGGGGAAGGAGGTAGCAACTATAAACTGACATTT	:::::::::0:-3:11:::::18:-8:45:::	CD4
1338	TGTGCTTTCATGAAGCATAGCGAAGCTGCAGGCAACAAGCTAACTTTT	TRAV38-1	0	TRAJ17	TRAV38	TRAJ17	CAFMKHSEAAGNKLTF	TGTGCTTTCATGAAGCATAGCGAAGCTGCAGGCAACAAGCTAACTTTT	:::::::::0:0:17:::::22:-6:48:::	CD8
1339	TGCATCCTGAGAGACGTAGCCGGCACTGCCAGTAAACTCACCTTT	TRAV26-2	0	TRAJ44	TRAV26	TRAJ44	CILRDVAGTASKLTF	TGCATCCTGAGAGACGTAGCCGGCACTGCCAGTAAACTCACCTTT	:::::::::0:0:15:::::19:-6:45:::	CD8
1340	TCTCAATCAGGAAACACACCTCTTGTCTTT	TRAV25	0	TRAJ29	TRAV25	TRAJ29	SQSGNTPLVF	TCTCAATCAGGAAACACACCTCTTGTCTTT	:::::::::0:-8:1:::::6:-5:30:::	CD4
1341	TGTGCTGTGACTTGGGGGAGCAACTATCAGTTAATCTGG	TRAV8-6	0	TRAJ33	TRAV8	TRAJ33	CAVTWGSNYQLIW	TGTGCTGTGACTTGGGGGAGCAACTATCAGTTAATCTGG	:::::::::0:-4:10:::::18:-5:39:::	CD4
1342	TGTGCCGGGGCCAATGCCAGACTCATGTTT	TRAV12-2	0	TRAJ31	TRAV12	TRAJ31	CAGANARLMF	TGTGCCGGGGCCAATGCCAGACTCATGTTT	:::::::::0:-6:7:::::11:-7:30:::	CD8
1343	TGCCCCCCTTCCCAAGGAAATCTCATCTTT	TRAV26-2	0	TRAJ42	TRAV26	TRAJ42	CPPSQGNLIF	TGCCCCCCTTCCCAAGGAAATCTCATCTTT	:::::::::0:-12:3:::::11:-16:30:::	0
1344	TGTGCAGCAAGCGCGTATACCGGTAACCAGTTCTATTTT	TRAV29DV5	0	TRAJ49	TRAV29	TRAJ49	CAASAYTGNQFYF	TGTGCAGCAAGCGCGTATACCGGTAACCAGTTCTATTTT	:::::::::0:0:13:::::18:-4:39:::	CD8
1345	TGTGCAGAGAATTCCGACCCTAATGCTGGTGGTACTAGCTATGGAAAGCTGACATTT	TRAV13-2	0	TRAJ52	TRAV13	TRAJ52	CAENSDPNAGGTSYGKLTF	TGTGCAGAGAATTCCGACCCTAATGCTGGTGGTACTAGCTATGGAAAGCTGACATTT	:::::::::0:-1:12:::::19:0:57:::	CD8
1346	TGCCTCGTGGGTGACCAGCAGGCAAATCAACCTTT	TRAV4	0	TRAJ27	TRAV4	TRAJ27	CLVGDQ_GKSTF	TGCCTCGTGGGTGACCAGCAGGCAAATCAACCTTT	:::::::::0:-1:15:::::17:-10:35:::	CD8
1347	TGTGCCGGGCCCTTTGGGGAATATGGAAACAAACTGGTCTTT	TRAV39	0	TRAJ47	TRAV39	TRAJ47	CAGPFGEYGNKLVF	TGTGCCGGGCCCTTTGGGGAATATGGAAACAAACTGGTCTTT	:::::::::0:-6:7:::::17:-1:42:::	CD8
1348	TGCGCTGTGAGAGTGAGGAATAACAATGCCAGACTCATGTTT	TRAV1-1	0	TRAJ31	TRAV1	TRAJ31	CAVRVRNNNARLMF	TGCGCTGTGAGAGTGAGGAATAACAATGCCAGACTCATGTTT	:::::::::0:-1:13:::::16:0:42:::	CD8
1349	TGTGCCGTGGCCGGTGCCAGACTCATGTTT	TRAV12-2	0	TRAJ31	TRAV12	TRAJ31	CAVAGARLMF	TGTGCCGTGGCCGGTGCCAGACTCATGTTT	:::::::::0:-4:9:::::14:-10:30:::	CD8
1350	TGTGTGGTGAGCGGGAATTCAGGATACAGCACCCTCACCTTT	TRAV10	0	TRAJ11	TRAV10	TRAJ11	CVVSGNSGYSTLTF	TGTGTGGTGAGCGGGAATTCAGGATACAGCACCCTCACCTTT	:::::::::0:0:13:::::14:-1:42:::	CD8
1351	TGTGCTACGGACGACACTGTATACAACTTCAACAAATTTTACTTT	TRAV17	0	TRAJ21	TRAV17	TRAJ21	CATDDTVYNFNKFYF	TGTGCTACGGACGACACTGTATACAACTTCAACAAATTTTACTTT	:::::::::0:0:13:::::17:4:45:::	0
1352	TGTGCCGTGAGAAATGACAAGATCATCTTT	TRAV12-2	0	TRAJ30	TRAV12	TRAJ30	CAVRNDKIIF	TGTGCCGTGAGAAATGACAAGATCATCTTT	:::::::::0:-3:10:::::9:-5:30:::	CD8
1353	TGTGCTGTGAGTCAACCTACTGGAGCCAATAGTAAGCTGACATTT	TRAV8-4	0	TRAJ56	TRAV8	TRAJ56	CAVSQPTGANSKLTF	TGTGCTGTGAGTCAACCTACTGGAGCCAATAGTAAGCTGACATTT	:::::::::0:-2:12:::::17:-3:45:::	CD4
1354	TGTGCAGCAAGCGAACCTGGGGGTTACCAGAAAGTTACCTTT	TRAV29DV5	0	TRAJ13	TRAV29	TRAJ13	CAASEPGGYQKVTF	TGTGCAGCAAGCGAACCTGGGGGTTACCAGAAAGTTACCTTT	:::::::::0:0:13:::::16:-6:42:::	CD8
1355	TGTGCTGTGAGGGACCCCTCTAACGACTACAAGCTCAGCTTT	TRAV8-4	0	TRAJ20	TRAV8	TRAJ20	CAVRDPSNDYKLSF	TGTGCTGTGAGGGACCCCTCTAACGACTACAAGCTCAGCTTT	:::::::::0:0:14:::::18:-2:42:::	CD4
1356	TGTGCCGCTACAGGATACAGCACCCTCACCTTT	TRAV12-2	0	TRAJ11	TRAV12	TRAJ11	CAATGYSTLTF	TGTGCCGCTACAGGATACAGCACCCTCACCTTT	:::::::::0:-6:7:::::10:-6:33:::	CD8
1357	TGTGCCGTTATTAATGACAAGATCATCTTT	TRAV12-2	0	TRAJ30	TRAV12	TRAJ30	CAVINDKIIF	TGTGCCGTTATTAATGACAAGATCATCTTT	:::::::::0:-5:8:::::13:-9:30:::	CD8
1358	TGTGCTGTGGGTGCCTGGTCAGGAAACACACCTCTTGTCTTT	TRAV8-3	0	TRAJ29	TRAV8	TRAJ29	CAVGAWSGNTPLVF	TGTGCTGTGGGTGCCTGGTCAGGAAACACACCTCTTGTCTTT	:::::::::0:0:14:::::18:-5:42:::	CD4
1359	TGCGTCGGGTTGGTGGTGCTACAAACAAGCTCATCTTT	TRAV1-1	0	TRAJ32	TRAV1	TRAJ32	CVGLVV_TNKLIF	TGCGTCGGGTTGGTGGTGCTACAAACAAGCTCATCTTT	:::::::::0:-10:4:::::10:-7:38:::	CD4
1360	TGTGCAGGAGTAGAGGCAAATTCCGGGTATGCACTCAACTTC	TRAV27	0	TRAJ41	TRAV27	TRAJ41	CAGVEANSGYALNF	TGTGCAGGAGTAGAGGCAAATTCCGGGTATGCACTCAACTTC	:::::::::0:0:10:::::16:-5:42:::	CD8
1361	TGTGCTTTCATGAAGCGATTCTATACTGGAGCCAATAGTAAGCTGACATTT	TRAV38-1	0	TRAJ56	TRAV38	TRAJ56	CAFMKRFYTGANSKLTF	TGTGCTTTCATGAAGCGATTCTATACTGGAGCCAATAGTAAGCTGACATTT	:::::::::0:-1:16:::::21:-1:51:::	CD8
1362	TGTGCCGTGAACATCGGACTCACGGGAGGAGGAAACAAACTCACCTTT	TRAV12-2	0	TRAJ10	TRAV12	TRAJ10	CAVNIGLTGGGNKLTF	TGTGCCGTGAACATCGGACTCACGGGAGGAGGAAACAAACTCACCTTT	:::::::::0:0:13:::::17:-2:48:::	CD4
1363	TGTGCCGTGCGAGACTACACGGGCAGGAGAGCACTTACTTTT	TRAV12-2	0	TRAJ5	TRAV12	TRAJ5	CAVRDYTGRRALTF	TGTGCCGTGCGAGACTACACGGGCAGGAGAGCACTTACTTTT	:::::::::0:-4:9:::::16:-3:42:::	CD8
1364	TGTGCCGTCGGGGACGACAAGCTCATCTTT	TRAV12-2	0	TRAJ34	TRAV12	TRAJ34	CAVGDDKLIF	TGTGCCGTCGGGGACGACAAGCTCATCTTT	:::::::::0:-5:8:::::14:-11:30:::	CD8
1365	TGTGCCGTGGGCTTAGATGGCCAGAAGCTGCTCTTT	TRAV12-2	0	TRAJ16	TRAV12	TRAJ16	CAVGLDGQKLLF	TGTGCCGTGGGCTTAGATGGCCAGAAGCTGCTCTTT	:::::::::0:-4:9:::::14:-7:36:::	CD4
1366	TGTGCTACGGACCCCTCCGTAGGGGGCACCGACAAGCTCATCTTT	TRAV17	0	TRAJ34	TRAV17	TRAJ34	CATDPSVGGTDKLIF	TGTGCTACGGACCCCTCCGTAGGGGGCACCGACAAGCTCATCTTT	:::::::::0:-1:12:::::26:-8:45:::	CD4
1367	TGTGCTACGGACGTCGGAGGAAGCTACATACCTACATTT	TRAV17	0	TRAJ6	TRAV17	TRAJ6	CATDVGGSYIPTF	TGTGCTACGGACGTCGGAGGAAGCTACATACCTACATTT	:::::::::0:0:13:::::15:-7:39:::	CD4
1368	TGTGCTGTGAGTCCCGTGGGTGCAGGCAACATGCTCACCTTT	TRAV8-6	0	TRAJ39	TRAV8	TRAJ39	CAVSPVGAGNMLTF	TGTGCTGTGAGTCCCGTGGGTGCAGGCAACATGCTCACCTTT	:::::::::0:-2:12:::::20:-10:42:::	CD4
1369	TGTGCCGGAGGAGGGGGGAAATTGCAGTTT	TRAV12-2	0	TRAJ24	TRAV12	TRAJ24	CAGGGGKLQF	TGTGCCGGAGGAGGGGGGAAATTGCAGTTT	:::::::::0:-6:7:::::13:-15:30:::	CD8
1370	TGCATCGTCAGAGGTCCCCGGTTAGGCTTTGGGAATGTGCTGCATTGC	TRAV26-1	0	TRAJ35	TRAV26	TRAJ35	CIVRGPRLGFGNVLHC	TGCATCGTCAGAGGTCCCCGGTTAGGCTTTGGGAATGTGCTGCATTGC	:::::::::0:-3:13:::::22:-2:48:::	CD4
1371	TGCATCCCCCTTGTGAGCTGCAGGCAACAAGCTAACTTTT	TRAV26-2	0	TRAJ17	TRAV26	TRAJ17	CIPLVSC_GNKLTF	TGCATCCCCCTTGTGAGCTGCAGGCAACAAGCTAACTTTT	:::::::::0:-8:7:::::15:-7:40:::	CD4
1372	TGTGCTGTGAGTGATCAGGGTAGCAACTATAAACTGACATTT	TRAV8-6	0	TRAJ53	TRAV8	TRAJ53	CAVSDQGSNYKLTF	TGTGCTGTGAGTGATCAGGGTAGCAACTATAAACTGACATTT	:::::::::0:0:14:::::18:-11:42:::	CD4
1373	TGTGCAGAGACCTCCCCTCTAGGAACCTACAAATACATCTTT	TRAV13-2	0	TRAJ40	TRAV13	TRAJ40	CAETSPLGTYKYIF	TGTGCAGAGACCTCCCCTCTAGGAACCTACAAATACATCTTT	:::::::::0:-3:10:::::15:-4:42:::	CD8
1374	TGTGCGGGACCGGTAACCAGTTCTATTTT	TRAV27	0	TRAJ49	TRAV27	TRAJ49	CAGPV_QFYF	TGTGCGGGACCGGTAACCAGTTCTATTTT	:::::::::0:-1:9:::::8:-4:29:::	CD8
1375	TGTGCTGTCCCACATGGAGGTGGTACTAGCTATGGAAAGCTGACATTT	TRAV8-6	0	TRAJ52	TRAV8	TRAJ52	CAVPHGGGTSYGKLTF	TGTGCTGTCCCACATGGAGGTGGTACTAGCTATGGAAAGCTGACATTT	:::::::::0:-6:8:::::18:-8:48:::	CD4
1376	TGTGCAGCAGGGAGGTCTCAGGGCGGATCTGAAAAGCTGGTCTTT	TRAV29DV5	0	TRAJ57	TRAV29	TRAJ57	CAAGRSQGGSEKLVF	TGTGCAGCAGGGAGGTCTCAGGGCGGATCTGAAAAGCTGGTCTTT	:::::::::0:-4:9:::::16:-3:45:::	CD8
1377	TGTGCAGCAAGCGCACCCTCAGGAACCTACAAATACATCTTT	TRAV29DV5	0	TRAJ40	TRAV29	TRAJ40	CAASAPSGTYKYIF	TGTGCAGCAAGCGCACCCTCAGGAACCTACAAATACATCTTT	:::::::::0:0:13:::::16:-4:42:::	CD4
1378	TGTGCAGCAAGCATGCGGCTTTGGGAATGTGCTGCATTGC	TRAV23DV6	0	TRAJ35	TRAV23	TRAJ35	CAASMRL_GNVLHC	TGTGCAGCAAGCATGCGGCTTTGGGAATGTGCTGCATTGC	:::::::::0:0:13:::::16:-4:40:::	CD8
1379	TGTGCAGCAAGCGCCTGAGACCAGGCAGGAACTGCTCTGATCTTT	TRAV29DV5	0	TRAJ15	TRAV29	TRAJ15	CAASA*DQAGTALIF	TGTGCAGCAAGCGCCTGAGACCAGGCAGGAACTGCTCTGATCTTT	:::::::::0:0:13:::::19:-3:45:::	CD8
1380	TGTGCTGCCTTTACCTCAGGAACCTACAAATACATCTTT	TRAV22	0	TRAJ40	TRAV22	TRAJ40	CAAFTSGTYKYIF	TGTGCTGCCTTTACCTCAGGAACCTACAAATACATCTTT	:::::::::0:-6:7:::::11:-2:39:::	CD8
1381	TGTGCTACGGACGCGCAAGGAGCCCAGAAGCTGGTATTT	TRAV17	0	TRAJ54	TRAV17	TRAJ54	CATDAQGAQKLVF	TGTGCTACGGACGCGCAAGGAGCCCAGAAGCTGGTATTT	:::::::::0:0:13:::::15:-5:39:::	CD8
1382	TGTGCTCTGAGTGAGGCAAAAACCAGTGGCTCTAGGTTGACCTTT	TRAV19	0	TRAJ58	TRAV19	TRAJ58	CALSEAKTSGSRLTF	TGTGCTCTGAGTGAGGCAAAAACCAGTGGCTCTAGGTTGACCTTT	:::::::::0:0:17:::::19:-6:45:::	CD8
1383	TGCGGAAATAGCAACACAGGCAAACTAATCTTT	TRAV38-1	0	TRAJ37	TRAV38	TRAJ37	CGNSNTGKLIF	TGCGGAAATAGCAACACAGGCAAACTAATCTTT	:::::::::0:-15:2:::::10:-8:33:::	CD8
1384	TGTGCTCTAGAATGGGCTGGCAACAACCGTAAGCTGATTTGG	TRAV6	0	TRAJ38	TRAV6	TRAJ38	CALEWAGNNRKLIW	TGTGCTCTAGAATGGGCTGGCAACAACCGTAAGCTGATTTGG	:::::::::0:-2:11:::::15:-4:42:::	CD4
1385	TGTGCAGAGAGCCACTTCCGGTTTTCAGATGGCCAGAAGCTGCTCTTT	TRAV5	0	TRAJ16	TRAV5	TRAJ16	CAESHFRFSDGQKLLF	TGTGCAGAGAGCCACTTCCGGTTTTCAGATGGCCAGAAGCTGCTCTTT	:::::::::0:-2:11:::::17:2:48:::	CD8
1386	TGTGCTGTGAGTGCCCTCTCAGGAACCTACAAATACATCTTT	TRAV8-6	0	TRAJ40	TRAV8	TRAJ40	CAVSALSGTYKYIF	TGTGCTGTGAGTGCCCTCTCAGGAACCTACAAATACATCTTT	:::::::::0:-1:13:::::17:-5:42:::	CD4
1387	TGTGTGGTAGGTGATGACAAGATCATCTTT	TRAV12-1	0	TRAJ30	TRAV12	TRAJ30	CVVGDDKIIF	TGTGTGGTAGGTGATGACAAGATCATCTTT	:::::::::0:-5:8:::::12:-8:30:::	CD8
1388	TGTGCAATGAGCCCCGGGCCAGACTCATGTTT	TRAV12-3	0	TRAJ31	TRAV12	TRAJ31	CAMSP_ARLMF	TGTGCAATGAGCCCCGGGCCAGACTCATGTTT	:::::::::0:-1:12:::::17:-11:32:::	CD8
1389	TGTGCCGTGAACACCCCCCAGGCAGGAACTGCTCTGATCTTT	TRAV12-2	0	TRAJ15	TRAV12	TRAJ15	CAVNTPQAGTALIF	TGTGCCGTGAACACCCCCCAGGCAGGAACTGCTCTGATCTTT	:::::::::0:0:13:::::17:-4:42:::	CD8
1390	TGTGCTGTGGGTGGGCCCCAGGGCACCGACAAGCTCATCTTT	TRAV8-3	0	TRAJ34	TRAV8	TRAJ34	CAVGGPQGTDKLIF	TGTGCTGTGGGTGGGCCCCAGGGCACCGACAAGCTCATCTTT	:::::::::0:-1:13:::::23:-8:42:::	CD4
1391	TGTGCTGTGAGTGATACGACCAATGCAGGCAAATCAACCTTT	TRAV8-6	0	TRAJ27	TRAV8	TRAJ27	CAVSDTTNAGKSTF	TGTGCTGTGAGTGATACGACCAATGCAGGCAAATCAACCTTT	:::::::::0:0:14:::::18:-4:42:::	CD4
1392	TGTGCTGTGAGTGATCGTGGGTCAAAGCTGCAGGCAACAAGCTAACTTTT	TRAV8-6	0	TRAJ17	TRAV8	TRAJ17	CAVSDRGS_AAGNKLTF	TGTGCTGTGAGTGATCGTGGGTCAAAGCTGCAGGCAACAAGCTAACTTTT	:::::::::0:0:14:::::11:6:50:::	CD8
1393	TGTGCAGCCATGTTAACCTCAGGAACCTACAAATACATCTTT	TRAV13-1	0	TRAJ40	TRAV13	TRAJ40	CAAMLTSGTYKYIF	TGTGCAGCCATGTTAACCTCAGGAACCTACAAATACATCTTT	:::::::::0:-5:8:::::15:-3:42:::	CD4
1394	TGTGCTGTGAGTGAGACAACTGCAGGCAACAAGCTAACTTTT	TRAV8-6	0	TRAJ17	TRAV8	TRAJ17	CAVSETTAGNKLTF	TGTGCTGTGAGTGAGACAACTGCAGGCAACAAGCTAACTTTT	:::::::::0:0:14:::::19:-9:42:::	CD4
1395	TGTGCAGCATGGGAAACGGGAGGAGGAAACAAACTCACCTTT	TRAV13-1	0	TRAJ10	TRAV13	TRAJ10	CAAWETGGGNKLTF	TGTGCAGCATGGGAAACGGGAGGAGGAAACAAACTCACCTTT	:::::::::0:-4:9:::::15:-6:42:::	CD4
1396	TGTGCCGTTTCTGGAAACAAACTGGTCTTT	TRAV12-2	0	TRAJ47	TRAV12	TRAJ47	CAVSGNKLVF	TGTGCCGTTTCTGGAAACAAACTGGTCTTT	:::::::::0:-5:8:::::11:-7:30:::	CD8
1397	TGGACCTTCAGGAGGAGGTGCTGACGGACTCACCTTT	TRAV25	0	TRAJ45	TRAV25	TRAJ45	WTFRRR_ADGLTF	TGGACCTTCAGGAGGAGGTGCTGACGGACTCACCTTT	:::::::::0:-7:2:::::6:-4:37:::	CD8
1398	TGTGCTTCAGGCAACAAGCTAACTTTT	TRAV1-2	0	TRAJ17	TRAV1	TRAJ17	CASGNKLTF	TGTGCTTCAGGCAACAAGCTAACTTTT	:::::::::0:-8:6:::::3:-8:27:::	CD8
1399	TGTGCTTTCATCTCATACAACTTCAACAAATTTTACTTT	TRAV38-1	0	TRAJ21	TRAV38	TRAJ21	CAFISYNFNKFYF	TGTGCTTTCATCTCATACAACTTCAACAAATTTTACTTT	:::::::::0:-6:11:::::14:1:39:::	CD4
1400	TGCATCGTCAGAGTCGAGGACAGAGATGACAAGATCATCTTT	TRAV26-1	0	TRAJ30	TRAV26	TRAJ30	CIVRVEDRDDKIIF	TGCATCGTCAGAGTCGAGGACAGAGATGACAAGATCATCTTT	:::::::::0:0:16:::::19:-3:42:::	CD8
1401	TGTGCTCTAAGTGGCCTCGGTTACCAGAAAGTTACCTTT	TRAV16	0	TRAJ13	TRAV16	TRAJ13	CALSGLGYQKVTF	TGTGCTCTAAGTGGCCTCGGTTACCAGAAAGTTACCTTT	:::::::::0:0:14:::::18:-11:39:::	CD4
1402	TGTGCCGTGAACATCGCCAGTAACCAGTTCTATTTT	TRAV12-2	0	TRAJ49	TRAV12	TRAJ49	CAVNIASNQFYF	TGTGCCGTGAACATCGCCAGTAACCAGTTCTATTTT	:::::::::0:0:13:::::16:-5:36:::	CD4
1403	TGTGCTCTGAGTGAGGCGAACGCTGGCAACAACCGTAAGCTGATTTGG	TRAV19	0	TRAJ38	TRAV19	TRAJ38	CALSEANAGNNRKLIW	TGTGCTCTGAGTGAGGCGAACGCTGGCAACAACCGTAAGCTGATTTGG	:::::::::0:0:17:::::18:-1:48:::	CD8
1404	TGTGCTGCCCGGATGGGAGGAGGAAGCCAAGGAAATCTCATCTTT	TRAV41	0	TRAJ42	TRAV41	TRAJ42	CAARMGGGSQGNLIF	TGTGCTGCCCGGATGGGAGGAGGAAGCCAAGGAAATCTCATCTTT	:::::::::0:-5:7:::::18:-8:45:::	CD4
1405	TGTGTGCTGTATTCAGGAGGAGGTGCTGACGGACTCACCTTT	TRAV12-1	0	TRAJ45	TRAV12	TRAJ45	CVLYSGGGADGLTF	TGTGTGCTGTATTCAGGAGGAGGTGCTGACGGACTCACCTTT	:::::::::0:-4:9:::::7:0:42:::	CD4
1406	TGTGCAGTCGGCTTTGGAAATGAGAAATTAACCTTT	TRAV29DV5	0	TRAJ48	TRAV29	TRAJ48	CAVGFGNEKLTF	TGTGCAGTCGGCTTTGGAAATGAGAAATTAACCTTT	:::::::::0:-6:7:::::11:-7:36:::	CD8
1407	TGCCTCGTGGGTGACAAAGCCCGAACTAGCAACACAGGCAAACTAATCTTT	TRAV4	0	TRAJ37	TRAV4	TRAJ37	CLVGDKARTSNTGKLIF	TGCCTCGTGGGTGACAAAGCCCGAACTAGCAACACAGGCAAACTAATCTTT	:::::::::0:0:16:::::25:-5:51:::	CD8
1408	TGTGCTTATAGGAGTGGAAGAAACCAGTGGCTCTAGGTTGACCTTT	TRAV38-2DV8	0	TRAJ58	TRAV38	TRAJ58	CAYRSGRN_SGSRLTF	TGTGCTTATAGGAGTGGAAGAAACCAGTGGCTCTAGGTTGACCTTT	:::::::::0:-2:14:::::17:-3:46:::	CD8
1409	TGTGCCTTTATAAAACGGGGAAGCCAAGGAAATCTCATCTTT	TRAV24	0	TRAJ42	TRAV24	TRAJ42	CAFIKRGSQGNLIF	TGTGCCTTTATAAAACGGGGAAGCCAAGGAAATCTCATCTTT	:::::::::0:0:10:::::18:-11:42:::	CD8
1410	TGTGCCGTGAACGCCTCAGGCAAACTAATCTTT	TRAV12-2	0	TRAJ37	TRAV12	TRAJ37	CAVNASGKLIF	TGTGCCGTGAACGCCTCAGGCAAACTAATCTTT	:::::::::0:-1:12:::::16:-14:33:::	CD8
1411	TGTGTGGTGAACGTGGTCCAGAGGCTCAACCCTGGGGAGGCTATACTTT	TRAV12-1	0	TRAJ18	TRAV12	TRAJ18	CVVNVVQR_STLGRLYF	TGTGTGGTGAACGTGGTCCAGAGGCTCAACCCTGGGGAGGCTATACTTT	:::::::::0:-1:12:::::18:-4:49:::	CD8
1412	TGTGCCGTGAGTAGCAATGACATGCGCTTT	TRAV12-2	0	TRAJ43	TRAV12	TRAJ43	CAVSSNDMRF	TGTGCCGTGAGTAGCAATGACATGCGCTTT	:::::::::0:-3:10:::::11:-4:30:::	CD8
1413	TGTGCTGTGAGTGTCTTTACCGGCACTGCCAGTAAACTCACCTTT	TRAV8-4	0	TRAJ44	TRAV8	TRAJ44	CAVSVFTGTASKLTF	TGTGCTGTGAGTGTCTTTACCGGCACTGCCAGTAAACTCACCTTT	:::::::::0:-1:13:::::17:-4:45:::	CD4
1414	TGTGCTGTGAGGCCCCTGGTTCTGCAAGGCAACTGACCTTT	TRAV8-6	0	TRAJ22	TRAV8	TRAJ22	CAVRPLV_ARQLTF	TGTGCTGTGAGGCCCCTGGTTCTGCAAGGCAACTGACCTTT	:::::::::0:-3:11:::::15:-6:41:::	CD8
1415	TGTGGCACAGCCTCCGGAGGAGGTGCTGACGGACTCACCTTT	TRAV30	0	TRAJ45	TRAV30	TRAJ45	CGTASGGGADGLTF	TGTGGCACAGCCTCCGGAGGAGGTGCTGACGGACTCACCTTT	:::::::::0:-3:10:::::12:-5:42:::	CD8
1416	TGTGCTGTGAGTGATATGTCTGGAGGCTTCAAAACTATCTTT	TRAV8-6	0	TRAJ9	TRAV8	TRAJ9	CAVSDMSGGFKTIF	TGTGCTGTGAGTGATATGTCTGGAGGCTTCAAAACTATCTTT	:::::::::0:0:14:::::19:-7:42:::	CD4
1417	TGTGCCGTGACCGATTACCAACTCACTTTC	TRAV12-2	0	TRAJ28	TRAV12	TRAJ28	CAVTDYQLTF	TGTGCCGTGACCGATTACCAACTCACTTTC	:::::::::0:-3:10:::::14:-19:30:::	CD8
1418	TGTGTGGTGAATGGAGATGGCCAGAAGCTGCTCTTT	TRAV12-1	0	TRAJ16	TRAV12	TRAJ16	CVVNGDGQKLLF	TGTGTGGTGAATGGAGATGGCCAGAAGCTGCTCTTT	:::::::::0:-2:11:::::14:-7:36:::	CD8
1419	TGTGTGGTCTCAGATGACAAGATCATCTTT	TRAV12-1	0	TRAJ30	TRAV12	TRAJ30	CVVSDDKIIF	TGTGTGGTCTCAGATGACAAGATCATCTTT	:::::::::0:-5:8:::::11:-7:30:::	0
1420	TGTGCAGTTGTGATGGATAGCAGCTATAAATTGATCTTC	TRAV12-3	0	TRAJ12	TRAV12	TRAJ12	CAVVMDSSYKLIF	TGTGCAGTTGTGATGGATAGCAGCTATAAATTGATCTTC	:::::::::0:-7:6:::::11:-1:39:::	CD8
1421	TGTGCTGTGGTTCGGAATTCTGGGGGTTACCAGAAAGTTACCTTT	TRAV22	0	TRAJ13	TRAV22	TRAJ13	CAVVRNSGGYQKVTF	TGTGCTGTGGTTCGGAATTCTGGGGGTTACCAGAAAGTTACCTTT	:::::::::0:-3:10:::::14:-1:45:::	CD8
1422	TGTGCAGAGATCGTTAACTATGGTCAGAATTTTGTCTTT	TRAV13-2	0	TRAJ26	TRAV13	TRAJ26	CAEIVNYGQNFVF	TGTGCAGAGATCGTTAACTATGGTCAGAATTTTGTCTTT	:::::::::0:-3:10:::::14:-4:39:::	CD8
1423	TGTGCAGGAACGACAGAGGCTGGGAGTTACCAACTCACTTTC	TRAV27	0	TRAJ28	TRAV27	TRAJ28	CAGTTEAGSYQLTF	TGTGCAGGAACGACAGAGGCTGGGAGTTACCAACTCACTTTC	:::::::::0:-1:9:::::17:-10:42:::	CD8
1424	TGTGCCGTGAACAGGGTAACTGACAGCTGGGGGAAATTGCAGTTT	TRAV12-2	0	TRAJ24	TRAV12	TRAJ24	CAVNRVTDSWGKLQF	TGTGCCGTGAACAGGGTAACTGACAGCTGGGGGAAATTGCAGTTT	:::::::::0:0:13:::::17:-4:45:::	CD8
1425	TGTGTGGTGAACGCCGGCTCAGGATACAGCACCCTCACCTTT	TRAV12-1	0	TRAJ11	TRAV12	TRAJ11	CVVNAGSGYSTLTF	TGTGTGGTGAACGCCGGCTCAGGATACAGCACCCTCACCTTT	:::::::::0:-1:12:::::18:-5:42:::	CD8
1426	TGTGCCGTGGGATCCGACAAGCTCATCTTT	TRAV12-2	0	TRAJ34	TRAV12	TRAJ34	CAVGSDKLIF	TGTGCCGTGGGATCCGACAAGCTCATCTTT	:::::::::0:-4:9:::::13:-10:30:::	CD8
1427	TGTGCCGTGATGGGAGGCAAACTAATCTTT	TRAV12-2	0	TRAJ37	TRAV12	TRAJ37	CAVMGGKLIF	TGTGCCGTGATGGGAGGCAAACTAATCTTT	:::::::::0:-3:10:::::14:-15:30:::	CD8
1428	TGTGCTCTGAGTGGTGGTGGTTCTGCAAGGCAACTGACCTTT	TRAV19	0	TRAJ22	TRAV19	TRAJ22	CALSGGGSARQLTF	TGTGCTCTGAGTGGTGGTGGTTCTGCAAGGCAACTGACCTTT	:::::::::0:-4:13:::::17:-7:42:::	CD8
1429	TGTGCTGTGAGTGGGGCGGGACAGGGAGGAAAGCTTATCTTC	TRAV8-4	0	TRAJ23	TRAV8	TRAJ23	CAVSGAGQGGKLIF	TGTGCTGTGAGTGGGGCGGGACAGGGAGGAAAGCTTATCTTC	:::::::::0:-1:13:::::21:-11:42:::	CD4
1430	TGTGCTGTGAGTGAAAGAGCTGCAGGCAACAAGCTAACTTTT	TRAV8-4	0	TRAJ17	TRAV8	TRAJ17	CAVSERAAGNKLTF	TGTGCTGTGAGTGAAAGAGCTGCAGGCAACAAGCTAACTTTT	:::::::::0:0:14:::::17:-7:42:::	CD4
1431	TGTGCTGTGCAAAAGGAAGCTACATACCTACATTT	TRAV21	0	TRAJ6	TRAV21	TRAJ6	CAVQKE_YIPTF	TGTGCTGTGCAAAAGGAAGCTACATACCTACATTT	:::::::::0:-3:9:::::13:-9:35:::	CD8
1432	TGTGTGGTGAGCGTTTTCAGAGAAGATGCAGGAACCTACAAATACATCTTT	TRAV10	0	TRAJ40	TRAV10	TRAJ40	CVVSVFREDAGTYKYIF	TGTGTGGTGAGCGTTTTCAGAGAAGATGCAGGAACCTACAAATACATCTTT	:::::::::0:0:13:::::28:-7:51:::	CD8
1433	TGTGCTGTGGACCCGGGGCAAACAACCTCTTCTTT	TRAV20	0	TRAJ36	TRAV20	TRAJ36	CAVDPG_NNLFF	TGTGCTGTGGACCCGGGGCAAACAACCTCTTCTTT	:::::::::0:-4:9:::::14:-7:35:::	CD8
1434	TGTGCTGTGGAGGTCTTAGTGTTGCTTAGAAAATAATGCAGGCAACATGCTCACCTTT	TRAV36DV7	0	TRAJ39	TRAV36	TRAJ39	CAVEVLVLLR_NNAGNMLTF	TGTGCTGTGGAGGTCTTAGTGTTGCTTAGAAAATAATGCAGGCAACATGCTCACCTTT	:::::::::0:0:13:::::28:-1:58:::	CD8
1435	TGCATCGTCAGATCGACCGGTAACCAGTTCTATTTT	TRAV26-1	0	TRAJ49	TRAV26	TRAJ49	CIVRSTGNQFYF	TGCATCGTCAGATCGACCGGTAACCAGTTCTATTTT	:::::::::0:0:15:::::15:-4:36:::	CD4
1436	TGTGCAGGAGAGTGGACCAGTGGCTCTAGGTTGACCTTT	TRAV27	0	TRAJ58	TRAV27	TRAJ58	CAGEWTSGSRLTF	TGTGCAGGAGAGTGGACCAGTGGCTCTAGGTTGACCTTT	:::::::::0:0:10:::::15:-8:39:::	CD8
1437	TGTGCAGAGATGACGAAAACCGACAAGCTCATCTTT	TRAV5	0	TRAJ34	TRAV5	TRAJ34	CAEMTKTDKLIF	TGTGCAGAGATGACGAAAACCGACAAGCTCATCTTT	:::::::::0:-3:10:::::15:-6:36:::	CD8
1438	TGTGCAGCAAGACTAGGGAAGGCTCTAGCAACACAGGCAAACTAATCTTT	TRAV13-1	0	TRAJ37	TRAV13	TRAJ37	CAARLGKA_SNTGKLIF	TGTGCAGCAAGACTAGGGAAGGCTCTAGCAACACAGGCAAACTAATCTTT	:::::::::0:-2:11:::::20:-1:50:::	CD8
1439	TGTGCAGGAGAAGTGGATTATGGAGGAAGCCAAGGAAATCTCATCTTT	TRAV27	0	TRAJ42	TRAV27	TRAJ42	CAGEVDYGGSQGNLIF	TGTGCAGGAGAAGTGGATTATGGAGGAAGCCAAGGAAATCTCATCTTT	:::::::::0:0:10:::::13:0:48:::	CD8
1440	TGTGCCGTGAACTACGAAAGTGACAGCTGGGGGAAATTGCAGTTT	TRAV12-2	0	TRAJ24	TRAV12	TRAJ24	CAVNYESDSWGKLQF	TGTGCCGTGAACTACGAAAGTGACAGCTGGGGGAAATTGCAGTTT	:::::::::0:-1:12:::::17:-4:45:::	CD8
1441	TGTGCCGTGATTTTCCCTAACGACTACAAGCTCAGCTTT	TRAV8-1	0	TRAJ20	TRAV8	TRAJ20	CAVIFPNDYKLSF	TGTGCCGTGATTTTCCCTAACGACTACAAGCTCAGCTTT	:::::::::0:-4:10:::::16:-3:39:::	CD8
1442	TGTGCAGCTCCGGACCGGGACACCGACAAGCTCATCTTT	TRAV29DV5	0	TRAJ34	TRAV29	TRAJ34	CAAPDRDTDKLIF	TGTGCAGCTCCGGACCGGGACACCGACAAGCTCATCTTT	:::::::::0:-5:8:::::19:-7:39:::	CD4
1443	TGTGCAGGAGCTCCCCATACAGGCAACATGCTCACCTTT	TRAV27	0	TRAJ39	TRAV27	TRAJ39	CAGAPHTGNMLTF	TGTGCAGGAGCTCCCCATACAGGCAACATGCTCACCTTT	:::::::::0:0:10:::::16:-9:39:::	CD8
1444	TGTGCGGAGGAGAAGCACAGGCAAACTAATCTTT	TRAV13-2	0	TRAJ37	TRAV13	TRAJ37	CAEEKH_GKLIF	TGTGCGGAGGAGAAGCACAGGCAAACTAATCTTT	:::::::::0:-4:9:::::15:-12:34:::	CD4
1445	TGTGCAGCAACCGCCCTATGGTCAGAATTTTGTCTTT	TRAV13-1	0	TRAJ26	TRAV13	TRAJ26	CAATAL_GQNFVF	TGTGCAGCAACCGCCCTATGGTCAGAATTTTGTCTTT	:::::::::0:-3:10:::::15:-7:37:::	CD8
1446	TGTGCTGTGTGGGGAGCTGGCAACAACCGTAAGCTGATTTGG	TRAV21	0	TRAJ38	TRAV21	TRAJ38	CAVWGAGNNRKLIW	TGTGCTGTGTGGGGAGCTGGCAACAACCGTAAGCTGATTTGG	:::::::::0:0:12:::::15:-4:42:::	CD8
1447	TGTGCTGTGAGAGCCCTTATGAATTATGGAGGAAGCCAAGGAAATCTCATCTTT	TRAV3	0	TRAJ42	TRAV3	TRAJ42	CAVRALMNYGGSQGNLIF	TGTGCTGTGAGAGCCCTTATGAATTATGGAGGAAGCCAAGGAAATCTCATCTTT	:::::::::0:-3:13:::::18:1:54:::	CD8
1448	TGTGCAGGATCAGATTCTGGGGCTGGGAGTTACCAACTCACTTTC	TRAV27	0	TRAJ28	TRAV27	TRAJ28	CAGSDSGAGSYQLTF	TGTGCAGGATCAGATTCTGGGGCTGGGAGTTACCAACTCACTTTC	:::::::::0:-1:9:::::15:-5:45:::	CD8
1449	TGCATCCTGAGAGACGGAGCAATAACAATGACATGCGCTTT	TRAV26-2	0	TRAJ43	TRAV26	TRAJ43	CILRDGA_NNDMRF	TGCATCCTGAGAGACGGAGCAATAACAATGACATGCGCTTT	:::::::::0:0:15:::::19:-1:41:::	CD8
1450	TGTGCTGTGAGAGATGATCCCTATAACTATGGTCAGAATTTTGTCTTT	TRAV21	0	TRAJ26	TRAV21	TRAJ26	CAVRDDPYNYGQNFVF	TGTGCTGTGAGAGATGATCCCTATAACTATGGTCAGAATTTTGTCTTT	:::::::::0:-1:11:::::22:-3:48:::	CD8
1451	TGTGCATAGAGGGGCGTGGCTACAATAAGCTGATTTTT	TRAV13-2	0	TRAJ4	TRAV13	TRAJ4	CA*RGV_YNKLIF	TGTGCATAGAGGGGCGTGGCTACAATAAGCTGATTTTT	:::::::::0:-3:10:::::15:-9:38:::	CD4
1452	TGTGCTTCCCTCCCAGGAACCTACAAATACATCTTT	TRAV38-1	0	TRAJ40	TRAV38	TRAJ40	CASLPGTYKYIF	TGTGCTTCCCTCCCAGGAACCTACAAATACATCTTT	:::::::::0:-10:7:::::13:-7:36:::	CD8
1453	TGTGCAGCAAGGAATATTAATGCTGGCAACAACCGTAAGCTGATTTGG	TRAV29DV5	0	TRAJ38	TRAV29	TRAJ38	CAARNINAGNNRKLIW	TGTGCAGCAAGGAATATTAATGCTGGCAACAACCGTAAGCTGATTTGG	:::::::::0:-2:11:::::17:0:48:::	CD8
1454	TGTGCAGCAGCCTCAACCTCAGGAACCTACAAATACATCTTT	TRAV29DV5	0	TRAJ40	TRAV29	TRAJ40	CAAASTSGTYKYIF	TGTGCAGCAGCCTCAACCTCAGGAACCTACAAATACATCTTT	:::::::::0:-4:9:::::15:-3:42:::	CD4
1455	TGCATCGAGAGAGGGGCAAACAACCTCTTCTTT	TRAV26-1	0	TRAJ36	TRAV26	TRAJ36	CIERGANNLFF	TGCATCGAGAGAGGGGCAAACAACCTCTTCTTT	:::::::::0:-3:13:::::12:-7:33:::	CD4
1456	TGTGCTGTGAGAGACTACTATGGAGGAAGCCAAGGAAATCTCATCTTT	TRAV3	0	TRAJ42	TRAV3	TRAJ42	CAVRDYYGGSQGNLIF	TGTGCTGTGAGAGACTACTATGGAGGAAGCCAAGGAAATCTCATCTTT	:::::::::0:-1:15:::::18:-5:48:::	CD8
1457	TGTGCTGTGAGTGATCAAGGTAACCAGGGAGGAAAGCTTATCTTC	TRAV8-6	0	TRAJ23	TRAV8	TRAJ23	CAVSDQGNQGGKLIF	TGTGCTGTGAGTGATCAAGGTAACCAGGGAGGAAAGCTTATCTTC	:::::::::0:0:14:::::20:-7:45:::	CD4
1458	TGTGCCGTGAAGAATTCCAAGATAATCTTT	TRAV12-2	0	TRAJ3	TRAV12	TRAJ3	CAVKNSKIIF	TGTGCCGTGAAGAATTCCAAGATAATCTTT	:::::::::0:-2:11:::::14:-15:30:::	CD8
1459	TGTGCCTTCATAACCGGTAACCAGTTCTATTTT	TRAV24	0	TRAJ49	TRAV24	TRAJ49	CAFITGNQFYF	TGTGCCTTCATAACCGGTAACCAGTTCTATTTT	:::::::::0:-2:8:::::12:-4:33:::	CD8
1460	TGTGTGGTGAACAGGGCCTCAGGAACCTACAAATACATCTTT	TRAV12-1	0	TRAJ40	TRAV12	TRAJ40	CVVNRASGTYKYIF	TGTGTGGTGAACAGGGCCTCAGGAACCTACAAATACATCTTT	:::::::::0:0:13:::::16:-4:42:::	CD4
1461	TGTGCTGCCGATACCCCCACCGGTAACCAGTTCTATTTT	TRAV41	0	TRAJ49	TRAV41	TRAJ49	CAADTPTGNQFYF	TGTGCTGCCGATACCCCCACCGGTAACCAGTTCTATTTT	:::::::::0:-5:7:::::17:-3:39:::	CD8
1462	TGTGCCGTGACGACCGACAAGCTCATCTTT	TRAV12-2	0	TRAJ34	TRAV12	TRAJ34	CAVTTDKLIF	TGTGCCGTGACGACCGACAAGCTCATCTTT	:::::::::0:-3:10:::::12:-9:30:::	CD8
1463	TGTGCCGTCCATCGTTCTAACGACTACAAGCTCAGCTTT	TRAV12-2	0	TRAJ20	TRAV12	TRAJ20	CAVHRSNDYKLSF	TGTGCCGTCCATCGTTCTAACGACTACAAGCTCAGCTTT	:::::::::0:-5:8:::::12:1:39:::	CD8
1464	TGTGCCGTGAACGAGGATGGCCAGAAGCTGCTCTTT	TRAV12-2	0	TRAJ16	TRAV12	TRAJ16	CAVNEDGQKLLF	TGTGCCGTGAACGAGGATGGCCAGAAGCTGCTCTTT	:::::::::0:-1:12:::::15:-8:36:::	CD8
1465	TGTGTTGTGAGTGAGAGAGGAAGCTACATACCTACATTT	TRAV8-2	0	TRAJ6	TRAV8	TRAJ6	CVVSERGSYIPTF	TGTGTTGTGAGTGAGAGAGGAAGCTACATACCTACATTT	:::::::::0:0:14:::::16:-8:39:::	CD4
1466	TGTGCCGTGATCCATGCCAGACTCATGTTT	TRAV12-2	0	TRAJ31	TRAV12	TRAJ31	CAVIHARLMF	TGTGCCGTGATCCATGCCAGACTCATGTTT	:::::::::0:-3:10:::::13:-9:30:::	CD8
1467	TGTGTTGTGAGTGATCGGAGGCTGGTGGTACTAGCTATGGAAAGCTGACATTT	TRAV8-2	0	TRAJ52	TRAV8	TRAJ52	CVVSDRRLV_TSYGKLTF	TGTGTTGTGAGTGATCGGAGGCTGGTGGTACTAGCTATGGAAAGCTGACATTT	:::::::::0:0:14:::::20:-5:53:::	CD8
1468	TGTGCTGTGAGAGATACTCAAACTGGGGCAAACAACCTCTTCTTT	TRAV1-2	0	TRAJ36	TRAV1	TRAJ36	CAVRDTQTGANNLFF	TGTGCTGTGAGAGATACTCAAACTGGGGCAAACAACCTCTTCTTT	:::::::::0:0:14:::::17:0:45:::	CD8
1469	TGCCTCGTGGGCTCAACTGACAGCTGGGGGAAATTGCAGTTT	TRAV4	0	TRAJ24	TRAV4	TRAJ24	CLVGSTDSWGKLQF	TGCCTCGTGGGCTCAACTGACAGCTGGGGGAAATTGCAGTTT	:::::::::0:-5:11:::::13:-3:42:::	CD8
1470	TGTGCTGTGGCCTTTTCAGATGGCCAGAAGCTGCTCTTT	TRAV1-2	0	TRAJ16	TRAV1	TRAJ16	CAVAFSDGQKLLF	TGTGCTGTGGCCTTTTCAGATGGCCAGAAGCTGCTCTTT	:::::::::0:-5:9:::::12:-2:39:::	CD8
1471	TGTGCTGTCGTGGATAGCAACTATCAGTTAATCTGG	TRAV1-2	0	TRAJ33	TRAV1	TRAJ33	CAVVDSNYQLIW	TGTGCTGTCGTGGATAGCAACTATCAGTTAATCTGG	:::::::::0:-6:8:::::10:0:36:::	CD8
1472	TGTGCAGCGAATTCAGGAGGAGGTGCTGACGGACTCACCTTT	TRAV13-1	0	TRAJ45	TRAV13	TRAJ45	CAANSGGGADGLTF	TGTGCAGCGAATTCAGGAGGAGGTGCTGACGGACTCACCTTT	:::::::::0:-5:8:::::10:-3:42:::	CD8
1473	TGTGCCGTTACCGGTAACCAGTTCTATTTT	TRAV12-2	0	TRAJ49	TRAV12	TRAJ49	CAVTGNQFYF	TGTGCCGTTACCGGTAACCAGTTCTATTTT	:::::::::0:-5:8:::::9:-4:30:::	CD8
1474	TGTGCTTATAGGAGCGGGGATACCGGCACTGCCAGTAAACTCACCTTT	TRAV38-2DV8	0	TRAJ44	TRAV38	TRAJ44	CAYRSGDTGTASKLTF	TGTGCTTATAGGAGCGGGGATACCGGCACTGCCAGTAAACTCACCTTT	:::::::::0:0:16:::::19:-3:48:::	CD4
1475	TGTGCCGTAGGCGACTACAAGCTCAGCTTT	TRAV12-2	0	TRAJ20	TRAV12	TRAJ20	CAVGDYKLSF	TGTGCCGTAGGCGACTACAAGCTCAGCTTT	:::::::::0:-5:8:::::11:-7:30:::	CD8
1476	TGTGTGGTGAACGCAGATGGCCAGAAGCTGCTCTTT	TRAV12-1	0	TRAJ16	TRAV12	TRAJ16	CVVNADGQKLLF	TGTGTGGTGAACGCAGATGGCCAGAAGCTGCTCTTT	:::::::::0:-1:12:::::13:-6:36:::	CD8
1477	TGTGCCGTGACGGGAGCCCAGAAGCTGGTATTT	TRAV12-2	0	TRAJ54	TRAV12	TRAJ54	CAVTGAQKLVF	TGTGCCGTGACGGGAGCCCAGAAGCTGGTATTT	:::::::::0:-3:10:::::11:-7:33:::	CD8
1478	TGTGCCGTGAGTGGAAACAAACTGGTCTTT	TRAV12-2	0	TRAJ47	TRAV12	TRAJ47	CAVSGNKLVF	TGTGCCGTGAGTGGAAACAAACTGGTCTTT	:::::::::0:-3:10:::::11:-7:30:::	CD8
1479	TGTGCCGTGGTTTCTGGGGGTTACCAGAAAGTTACCTTT	TRAV12-2	0	TRAJ13	TRAV12	TRAJ13	CAVVSGGYQKVTF	TGTGCCGTGGTTTCTGGGGGTTACCAGAAAGTTACCTTT	:::::::::0:-4:9:::::11:-4:39:::	CD8
1480	TGTGCAATGAGTCCCTTTTCTGGTGGCTACAATAAGCTGATTTTT	TRAV12-3	0	TRAJ4	TRAV12	TRAJ4	CAMSPFSGGYNKLIF	TGTGCAATGAGTCCCTTTTCTGGTGGCTACAATAAGCTGATTTTT	:::::::::0:-2:11:::::15:-2:45:::	CD8
1481	TGTGCAATGAGCGCGTGGGGCTTTGGGAATGTGCTGCATTGC	TRAV12-3	0	TRAJ35	TRAV12	TRAJ35	CAMSAWGFGNVLHC	TGTGCAATGAGCGCGTGGGGCTTTGGGAATGTGCTGCATTGC	:::::::::0:0:13:::::18:-4:42:::	CD4
1482	TGTGCTGTGAAAAACAATGCCAGACTCATGTTT	TRAV21	0	TRAJ31	TRAV21	TRAJ31	CAVKNNARLMF	TGTGCTGTGAAAAACAATGCCAGACTCATGTTT	:::::::::0:-2:10:::::8:-1:33:::	CD8
1483	TGTGCCGCTAACAATGCCAGACTCATGTTT	TRAV12-2	0	TRAJ31	TRAV12	TRAJ31	CAANNARLMF	TGTGCCGCTAACAATGCCAGACTCATGTTT	:::::::::0:0:13:::::8:-4:30:::	CD8
1484	TGTGCCGCCATGGATAGCAACTATCAGTTAATCTGG	TRAV1-2	0	TRAJ33	TRAV1	TRAJ33	CAAMDSNYQLIW	TGTGCCGCCATGGATAGCAACTATCAGTTAATCTGG	:::::::::0:-9:5:::::7:3:36:::	CD8
1485	TGTGCCCCCGGAGATGACAAGATCATCTTT	TRAV12-2	0	TRAJ30	TRAV12	TRAJ30	CAPGDDKIIF	TGTGCCCCCGGAGATGACAAGATCATCTTT	:::::::::0:-7:6:::::10:-6:30:::	CD8
1486	TGTGCCGTGAACACTCCAACTGACAGCTGGGGGAAATTGCAGTTT	TRAV12-2	0	TRAJ24	TRAV12	TRAJ24	CAVNTPTDSWGKLQF	TGTGCCGTGAACACTCCAACTGACAGCTGGGGGAAATTGCAGTTT	:::::::::0:0:13:::::16:-3:45:::	CD8
1487	TGTGCAATGAGCTTCAATTCAGGATACAGCACCCTCACCTTT	TRAV12-3	0	TRAJ11	TRAV12	TRAJ11	CAMSFNSGYSTLTF	TGTGCAATGAGCTTCAATTCAGGATACAGCACCCTCACCTTT	:::::::::0:-1:12:::::15:-2:42:::	CD4
1488	TGCGCCGGTAACCAGTTCTATTTT	TRAV34	0	TRAJ49	TRAV34	TRAJ49	CAGNQFYF	TGCGCCGGTAACCAGTTCTATTTT	:::::::::0:-11:2:::::4:-5:24:::	CD4
1489	TGTGCTGTGGAAGTGGATAGCAGCTATAAATTGATCTTC	TRAV22	0	TRAJ12	TRAV22	TRAJ12	CAVEVDSSYKLIF	TGTGCTGTGGAAGTGGATAGCAGCTATAAATTGATCTTC	:::::::::0:-2:11:::::13:-3:39:::	CD8
1490	TGTGCAGCCCTAATGCAGGCAACATGCTCACCTTT	TRAV25	0	TRAJ39	TRAV25	TRAJ39	CAALMQ_NMLTF	TGTGCAGCCCTAATGCAGGCAACATGCTCACCTTT	:::::::::0:-2:7:::::10:-7:35:::	CD8
1491	TGTGCTCTGAGTGAGGCGGATGGTCAGAATTTTGTCTTT	TRAV19	0	TRAJ26	TRAV19	TRAJ26	CALSEADGQNFVF	TGTGCTCTGAGTGAGGCGGATGGTCAGAATTTTGTCTTT	:::::::::0:0:17:::::19:-9:39:::	CD8
1492	TGTGCAATGAAGATTTCTGGTGGCTACAATAAGCTGATTTTT	TRAV12-3	0	TRAJ4	TRAV12	TRAJ4	CAMKISGGYNKLIF	TGTGCAATGAAGATTTCTGGTGGCTACAATAAGCTGATTTTT	:::::::::0:-3:10:::::13:-3:42:::	CD4
1493	TGTGCAGGGTTGAGGGATAGCAACTATCAGTTAATCTGG	TRAV25	0	TRAJ33	TRAV25	TRAJ33	CAGLRDSNYQLIW	TGTGCAGGGTTGAGGGATAGCAACTATCAGTTAATCTGG	:::::::::0:0:9:::::14:-1:39:::	CD8
1494	TGTGCAGCAAGCGCCACCGGTAACCAGTTCTATTTT	TRAV29DV5	0	TRAJ49	TRAV29	TRAJ49	CAASATGNQFYF	TGTGCAGCAAGCGCCACCGGTAACCAGTTCTATTTT	:::::::::0:0:13:::::14:-3:36:::	CD4
1495	TGTGCTGTGTGGGCTGGGGCAAACAACCTCTTCTTT	TRAV21	0	TRAJ36	TRAV21	TRAJ36	CAVWAGANNLFF	TGTGCTGTGTGGGCTGGGGCAAACAACCTCTTCTTT	:::::::::0:0:12:::::13:-5:36:::	CD4
1496	TGTGCAGCAAGTGACCAGGCAGGAACTGCTCTGATCTTT	TRAV13-1	0	TRAJ15	TRAV13	TRAJ15	CAASDQAGTALIF	TGTGCAGCAAGTGACCAGGCAGGAACTGCTCTGATCTTT	:::::::::0:-1:12:::::13:-3:39:::	CD4
1497	TGTGCAGCAAGCGCGGGTAACCAGTTCTATTTT	TRAV29DV5	0	TRAJ49	TRAV29	TRAJ49	CAASAGNQFYF	TGTGCAGCAAGCGCGGGTAACCAGTTCTATTTT	:::::::::0:0:13:::::15:-7:33:::	CD8
1498	TGTGCAGCAAGCGAGGGAACCGGCACTGCCAGTAAACTCACCTTT	TRAV29DV5	0	TRAJ44	TRAV29	TRAJ44	CAASEGTGTASKLTF	TGTGCAGCAAGCGAGGGAACCGGCACTGCCAGTAAACTCACCTTT	:::::::::0:0:13:::::18:-5:45:::	CD8
1499	TGTGCAGAGAGGCCTGCAACTGACAGCTGGGGGAAATTGCAGTTT	TRAV5	0	TRAJ24	TRAV5	TRAJ24	CAERPATDSWGKLQF	TGTGCAGAGAGGCCTGCAACTGACAGCTGGGGGAAATTGCAGTTT	:::::::::0:-2:11:::::16:-3:45:::	CD8
1500	TGTGCAGAATCGACGGTGGTGCTACAAACAAGCTCATCTTT	TRAV27	0	TRAJ32	TRAV27	TRAJ32	CAESTVV_TNKLIF	TGTGCAGAATCGACGGTGGTGCTACAAACAAGCTCATCTTT	:::::::::0:-3:7:::::14:-8:41:::	CD8
1501	TGTGTGGTGAGCGCGGAATCACGGGAGGAGGAAACAAACTCACCTTT	TRAV10	0	TRAJ10	TRAV10	TRAJ10	CVVSAESR_GGNKLTF	TGTGTGGTGAGCGCGGAATCACGGGAGGAGGAAACAAACTCACCTTT	:::::::::0:0:13:::::18:-4:47:::	CD8
1502	TGTGCCGTGACAGGTGCCAGACTCATGTTT	TRAV12-2	0	TRAJ31	TRAV12	TRAJ31	CAVTGARLMF	TGTGCCGTGACAGGTGCCAGACTCATGTTT	:::::::::0:-3:10:::::14:-10:30:::	CD8
1503	TGTGTGGGGGGCGACTACAAGCTCAGCTTT	TRAV12-1	0	TRAJ20	TRAV12	TRAJ20	CVGGDYKLSF	TGTGTGGGGGGCGACTACAAGCTCAGCTTT	:::::::::0:-6:7:::::11:-7:30:::	CD8
1504	TGTGCAGCAGGAACCTACAAATACATCTTT	TRAV29DV5	0	TRAJ40	TRAV29	TRAJ40	CAAGTYKYIF	TGTGCAGCAGGAACCTACAAATACATCTTT	:::::::::0:-4:9:::::7:-7:30:::	CD4
1505	TGTGCAGCCCGGAGGAGGTGCTGACGGACTCACCTTT	TRAV29DV5	0	TRAJ45	TRAV29	TRAJ45	CAARRR_ADGLTF	TGTGCAGCCCGGAGGAGGTGCTGACGGACTCACCTTT	:::::::::0:-5:8:::::10:-8:37:::	CD8
1506	TGTGCTACGGGGGGCTTTCAGAAACTTGTATTT	TRAV17	0	TRAJ8	TRAV17	TRAJ8	CATGGFQKLVF	TGTGCTACGGGGGGCTTTCAGAAACTTGTATTT	:::::::::0:-3:10:::::12:-8:33:::	CD8
1507	TGTGTTGTGAGTGATGGTAAGGAATATGGAAACAAACTGGTCTTT	TRAV8-2	0	TRAJ47	TRAV8	TRAJ47	CVVSDGKEYGNKLVF	TGTGTTGTGAGTGATGGTAAGGAATATGGAAACAAACTGGTCTTT	:::::::::0:0:14:::::20:-1:45:::	CD8
1508	TGTGCAGGGCAGGGCATTGAGAAATTAACCTTT	TRAV25	0	TRAJ48	TRAV25	TRAJ48	CAGQGIEKLTF	TGTGCAGGGCAGGGCATTGAGAAATTAACCTTT	:::::::::0:0:9:::::17:-16:33:::	CD8
1509	TGCATCGTCAGAGAGACCGGGGGACATGCGCTTT	TRAV26-1	0	TRAJ43	TRAV26	TRAJ43	CIVRET_GDMRF	TGCATCGTCAGAGAGACCGGGGGACATGCGCTTT	:::::::::0:-3:13:::::22:-11:34:::	CD8
1510	TGTGCCGCCGCCAATGCCAGACTCATGTTT	TRAV12-2	0	TRAJ31	TRAV12	TRAJ31	CAAANARLMF	TGTGCCGCCGCCAATGCCAGACTCATGTTT	:::::::::0:-6:7:::::11:-7:30:::	CD8
1511	TGTGTGGTGATGGATGCCAGACTCATGTTT	TRAV12-1	0	TRAJ31	TRAV12	TRAJ31	CVVMDARLMF	TGTGTGGTGATGGATGCCAGACTCATGTTT	:::::::::0:-3:10:::::13:-9:30:::	CD8
1512	TGTGCAGGGTCGTTGGTGGTGCTACAAACAAGCTCATCTTT	TRAV25	0	TRAJ32	TRAV25	TRAJ32	CAGSLVV_TNKLIF	TGTGCAGGGTCGTTGGTGGTGCTACAAACAAGCTCATCTTT	:::::::::0:0:9:::::13:-7:41:::	CD8
1513	TGTGCCGTATCCAACTATCAGTTAATCTGG	TRAV12-2	0	TRAJ33	TRAV12	TRAJ33	CAVSNYQLIW	TGTGCCGTATCCAACTATCAGTTAATCTGG	:::::::::0:-5:8:::::11:-7:30:::	CD8
1514	TGTGCCGTGAACAAACCAACTGACAGCTGGGGGAAATTGCAGTTT	TRAV12-2	0	TRAJ24	TRAV12	TRAJ24	CAVNKPTDSWGKLQF	TGTGCCGTGAACAAACCAACTGACAGCTGGGGGAAATTGCAGTTT	:::::::::0:0:13:::::16:-3:45:::	CD8
1515	TGTGCTACGGATTCGATTTATAACCAGGGAGGAAAGCTTATCTTC	TRAV17	0	TRAJ23	TRAV17	TRAJ23	CATDSIYNQGGKLIF	TGTGCTACGGATTCGATTTATAACCAGGGAGGAAAGCTTATCTTC	:::::::::0:-2:11:::::14:-1:45:::	CD8
1516	TGCATCCCTTATATGAGCTGCAGGCAACAAGCTAACTTTT	TRAV26-2	0	TRAJ17	TRAV26	TRAJ17	CIPYMSC_GNKLTF	TGCATCCCTTATATGAGCTGCAGGCAACAAGCTAACTTTT	:::::::::0:-8:7:::::15:-7:40:::	CD8
1517	TGTGCTGTGACCGACCGGGCAGGCAACATGCTCACCTTT	TRAV8-4	0	TRAJ39	TRAV8	TRAJ39	CAVTDRAGNMLTF	TGTGCTGTGACCGACCGGGCAGGCAACATGCTCACCTTT	:::::::::0:-4:10:::::18:-11:39:::	CD4
1518	TGTGCTGTGAGTCATGGCTCTAGCAACACAGGCAAACTAATCTTT	TRAV8-6	0	TRAJ37	TRAV8	TRAJ37	CAVSHGSSNTGKLIF	TGTGCTGTGAGTCATGGCTCTAGCAACACAGGCAAACTAATCTTT	:::::::::0:-2:12:::::8:6:45:::	CD4
1519	TGTGCAGGAAAAGCTGCAGGCAACAAGCTAACTTTT	TRAV27	0	TRAJ17	TRAV27	TRAJ17	CAGKAAGNKLTF	TGTGCAGGAAAAGCTGCAGGCAACAAGCTAACTTTT	:::::::::0:-1:9:::::9:-5:36:::	CD4
1520	TGTGCCGTCACCGGTAACCAGTTCTATTTT	TRAV12-2	0	TRAJ49	TRAV12	TRAJ49	CAVTGNQFYF	TGTGCCGTCACCGGTAACCAGTTCTATTTT	:::::::::0:-5:8:::::8:-3:30:::	CD8
1521	TGTGCAGCAACCCCAACTGGGGCAAACAACCTCTTCTTT	TRAV13-1	0	TRAJ36	TRAV13	TRAJ36	CAATPTGANNLFF	TGTGCAGCAACCCCAACTGGGGCAAACAACCTCTTCTTT	:::::::::0:-3:10:::::14:-3:39:::	CD8
1522	TGTGCTTTCATGAACTATAACACCGACAAGCTCATCTTT	TRAV38-1	0	TRAJ34	TRAV38	TRAJ34	CAFMNYNTDKLIF	TGTGCTTTCATGAACTATAACACCGACAAGCTCATCTTT	:::::::::0:-3:14:::::15:-3:39:::	CD4
1523	TGTGCAGCAAGCGCGGTCTCAGGAACCTACAAATACATCTTT	TRAV29DV5	0	TRAJ40	TRAV29	TRAJ40	CAASAVSGTYKYIF	TGTGCAGCAAGCGCGGTCTCAGGAACCTACAAATACATCTTT	:::::::::0:0:13:::::17:-5:42:::	CD4
1524	TGTGCTGTGAGTGAAAGTGGAGCCAATAGTAAGCTGACATTT	TRAV8-6	0	TRAJ56	TRAV8	TRAJ56	CAVSESGANSKLTF	TGTGCTGTGAGTGAAAGTGGAGCCAATAGTAAGCTGACATTT	:::::::::0:0:14:::::17:-6:42:::	CD4
1525	TGTGTGGTGCCTACCTCAGGAACCTACAAATACATCTTT	TRAV12-1	0	TRAJ40	TRAV12	TRAJ40	CVVPTSGTYKYIF	TGTGTGGTGCCTACCTCAGGAACCTACAAATACATCTTT	:::::::::0:-4:9:::::10:-1:39:::	CD4
1526	TGTGCCGTGAGCGGTAACCAGTTCTATTTT	TRAV12-2	0	TRAJ49	TRAV12	TRAJ49	CAVSGNQFYF	TGTGCCGTGAGCGGTAACCAGTTCTATTTT	:::::::::0:-3:10:::::11:-6:30:::	CD8
1527	TGTGCTCTGGGGGATGACAAGATCATCTTT	TRAV12-2	0	TRAJ30	TRAV12	TRAJ30	CALGDDKIIF	TGTGCTCTGGGGGATGACAAGATCATCTTT	:::::::::0:-8:5:::::12:-8:30:::	CD8
1528	TGTGCTGTGGGTGCGCAGGCTGCAGGCAACAAGCTAACTTTT	TRAV8-3	0	TRAJ17	TRAV8	TRAJ17	CAVGAQAAGNKLTF	TGTGCTGTGGGTGCGCAGGCTGCAGGCAACAAGCTAACTTTT	:::::::::0:0:14:::::18:-8:42:::	CD4
1529	TGTGCAGCAAGCGCCAGTAACCAGTTCTATTTT	TRAV29DV5	0	TRAJ49	TRAV29	TRAJ49	CAASASNQFYF	TGTGCAGCAAGCGCCAGTAACCAGTTCTATTTT	:::::::::0:0:13:::::13:-5:33:::	CD8
1530	TGTGCTGTGAGCCTAATTCAGGGAGCCCAGAAGCTGGTATTT	TRAV8-6	0	TRAJ54	TRAV8	TRAJ54	CAVSLIQGAQKLVF	TGTGCTGTGAGCCTAATTCAGGGAGCCCAGAAGCTGGTATTT	:::::::::0:-3:11:::::13:0:42:::	CD4
1531	TGTGCAGCAAGTGGGGATAGCAACTATCAGTTAATCTGG	TRAV13-1	0	TRAJ33	TRAV13	TRAJ33	CAASGDSNYQLIW	TGTGCAGCAAGTGGGGATAGCAACTATCAGTTAATCTGG	:::::::::0:-1:12:::::14:-1:39:::	CD4
1532	TGTGCAGGACCCATGGAATATGGAAACAAACTGGTCTTT	TRAV27	0	TRAJ47	TRAV27	TRAJ47	CAGPMEYGNKLVF	TGTGCAGGACCCATGGAATATGGAAACAAACTGGTCTTT	:::::::::0:-1:9:::::10:3:39:::	CD8
1533	TGTGCTGTGACGTACAGCAGTGCTTCCAAGATAATCTTT	TRAV8-4	0	TRAJ3	TRAV8	TRAJ3	CAVTYSSASKIIF	TGTGCTGTGACGTACAGCAGTGCTTCCAAGATAATCTTT	:::::::::0:-4:10:::::11:-3:39:::	CD4
1534	TGTGCTGTGAGTGATCGAAGTGGAGGTAGCAACTATAAACTGACATTT	TRAV8-4	0	TRAJ53	TRAV8	TRAJ53	CAVSDRSGGSNYKLTF	TGTGCTGTGAGTGATCGAAGTGGAGGTAGCAACTATAAACTGACATTT	:::::::::0:0:14:::::18:-5:48:::	CD4
1535	TGTGCAGCAAGCGCTCCCTCAGGAACCTACAAATACATCTTT	TRAV29DV5	0	TRAJ40	TRAV29	TRAJ40	CAASAPSGTYKYIF	TGTGCAGCAAGCGCTCCCTCAGGAACCTACAAATACATCTTT	:::::::::0:0:13:::::13:-1:42:::	CD4
1536	TGTGCCGTGAATGCAGGCAAATCAACCTTT	TRAV12-2	0	TRAJ27	TRAV12	TRAJ27	CAVNAGKSTF	TGTGCCGTGAATGCAGGCAAATCAACCTTT	:::::::::0:-2:11:::::9:-7:30:::	CD8
1537	TGTGCAGGAGAAGGTAACCAGGGAGGAAAGCTTATCTTC	TRAV27	0	TRAJ23	TRAV27	TRAJ23	CAGEGNQGGKLIF	TGTGCAGGAGAAGGTAACCAGGGAGGAAAGCTTATCTTC	:::::::::0:0:10:::::14:-7:39:::	CD8
1538	TGTGCAGCAAGTACCGATAACTATGGTCAGAATTTTGTCTTT	TRAV23DV6	0	TRAJ26	TRAV23	TRAJ26	CAASTDNYGQNFVF	TGTGCAGCAAGTACCGATAACTATGGTCAGAATTTTGTCTTT	:::::::::0:-2:11:::::15:-2:42:::	CD8
1539	TGTGCTCTGAGTGAGGCAACTGACAGCTGGGGGAAATTGCAGTTT	TRAV19	0	TRAJ24	TRAV19	TRAJ24	CALSEATDSWGKLQF	TGTGCTCTGAGTGAGGCAACTGACAGCTGGGGGAAATTGCAGTTT	:::::::::0:0:17:::::16:-3:45:::	CD8
1540	TGCATCGTCAGAGTCGCGTATAATGCAGGCAACATGCTCACCTTT	TRAV26-1	0	TRAJ39	TRAV26	TRAJ39	CIVRVAYNAGNMLTF	TGCATCGTCAGAGTCGCGTATAATGCAGGCAACATGCTCACCTTT	:::::::::0:0:16:::::19:-6:45:::	CD4
1541	TGTGCAGCCATCATGGATAGCAACTATCAGTTAATCTGG	TRAV12-2	0	TRAJ33	TRAV12	TRAJ33	CAAIMDSNYQLIW	TGTGCAGCCATCATGGATAGCAACTATCAGTTAATCTGG	:::::::::0:-8:5:::::11:2:39:::	CD8
1542	TGTGCTGTGAGTGATGATAATGCAGGCAACATGCTCACCTTT	TRAV8-6	0	TRAJ39	TRAV8	TRAJ39	CAVSDDNAGNMLTF	TGTGCTGTGAGTGATGATAATGCAGGCAACATGCTCACCTTT	:::::::::0:0:14:::::13:-3:42:::	CD4
1543	TGTGCCGTGACCAGAGGCTCAACCCTGGGGAGGCTATACTTT	TRAV12-2	0	TRAJ18	TRAV12	TRAJ18	CAVTRGSTLGRLYF	TGTGCCGTGACCAGAGGCTCAACCCTGGGGAGGCTATACTTT	:::::::::0:0:13:::::11:-4:42:::	CD8
1544	TGTGCTCTGAGTGGTTATAACACCGACAAGCTCATCTTT	TRAV9-2	0	TRAJ34	TRAV9	TRAJ34	CALSGYNTDKLIF	TGTGCTCTGAGTGGTTATAACACCGACAAGCTCATCTTT	:::::::::0:-1:13:::::14:-2:39:::	CD8
1545	TGTGCCGTGGGTGGAAACAAACTGGTCTTT	TRAV12-2	0	TRAJ47	TRAV12	TRAJ47	CAVGGNKLVF	TGTGCCGTGGGTGGAAACAAACTGGTCTTT	:::::::::0:-4:9:::::11:-7:30:::	CD8
1546	TGTGCCTTTTGTTCTAACGACTACAAGCTCAGCTTT	TRAV24	0	TRAJ20	TRAV24	TRAJ20	CAFCSNDYKLSF	TGTGCCTTTTGTTCTAACGACTACAAGCTCAGCTTT	:::::::::0:-1:9:::::10:0:36:::	CD8
1547	TGTGCCGTGATATCTTATAACACCGACAAGCTCATCTTT	TRAV12-2	0	TRAJ34	TRAV12	TRAJ34	CAVISYNTDKLIF	TGTGCCGTGATATCTTATAACACCGACAAGCTCATCTTT	:::::::::0:-3:10:::::11:1:39:::	CD8
1548	TGTGCAGCAAGCGCGTGGGGTAACCAGTTCTATTTT	TRAV29DV5	0	TRAJ49	TRAV29	TRAJ49	CAASAWGNQFYF	TGTGCAGCAAGCGCGTGGGGTAACCAGTTCTATTTT	:::::::::0:0:13:::::18:-7:36:::	CD8
1549	TGTGCCGTGACTGCAGGAACTGCTCTGATCTTT	TRAV12-2	0	TRAJ15	TRAV12	TRAJ15	CAVTAGTALIF	TGTGCCGTGACTGCAGGAACTGCTCTGATCTTT	:::::::::0:-3:10:::::12:-8:33:::	CD8
1550	TGCCTCGGGAATAATGCAGGCAACATGCTCACCTTT	TRAV4	0	TRAJ39	TRAV4	TRAJ39	CLGNNAGNMLTF	TGCCTCGGGAATAATGCAGGCAACATGCTCACCTTT	:::::::::0:-9:7:::::9:-5:36:::	CD4
1551	TGTTCGGCGTCAGGAGGAAGCTACATACCTACATTT	TRAV12-2	0	TRAJ6	TRAV12	TRAJ6	CSASGGSYIPTF	TGTTCGGCGTCAGGAGGAAGCTACATACCTACATTT	:::::::::0:-10:3:::::6:-1:36:::	CD8
1552	TGCATCCTGTCACCCCAATCCGCGAACACCGGTAACCAGTTCTATTTT	TRAV26-2	0	TRAJ49	TRAV26	TRAJ49	CILSPQSANTGNQFYF	TGCATCCTGTCACCCCAATCCGCGAACACCGGTAACCAGTTCTATTTT	:::::::::0:-6:9:::::22:1:48:::	CD4
1553	TGTGCCGTGAACCCCCCAACTGACAGCTGGGGGAAATTGCAGTTT	TRAV12-2	0	TRAJ24	TRAV12	TRAJ24	CAVNPPTDSWGKLQF	TGTGCCGTGAACCCCCCAACTGACAGCTGGGGGAAATTGCAGTTT	:::::::::0:-1:12:::::16:-3:45:::	CD8
1554	TGTGCAGCAAGCAGTCGGGGCAATGACATGCGCTTT	TRAV29DV5	0	TRAJ43	TRAV29	TRAJ43	CAASSRGNDMRF	TGTGCAGCAAGCAGTCGGGGCAATGACATGCGCTTT	:::::::::0:-1:12:::::20:-7:36:::	CD8
1555	TGTGCATCCTCTTTCTGGTGGCTACAATAAGCTGATTTTT	TRAV13-1	0	TRAJ4	TRAV13	TRAJ4	CASSFWW_YNKLIF	TGTGCATCCTCTTTCTGGTGGCTACAATAAGCTGATTTTT	:::::::::0:-7:6:::::11:-3:40:::	CD4
1556	TGTGCCTGCCTGAGGGATGGTCAGAATTTTGTCTTT	TRAV12-2	0	TRAJ26	TRAV12	TRAJ26	CACLRDGQNFVF	TGTGCCTGCCTGAGGGATGGTCAGAATTTTGTCTTT	:::::::::0:-7:6:::::16:-9:36:::	CD4
1557	TGTGCAGCAAGTATGGGCAACACCGACAAGCTCATCTTT	TRAV13-1	0	TRAJ34	TRAV13	TRAJ34	CAASMGNTDKLIF	TGTGCAGCAAGTATGGGCAACACCGACAAGCTCATCTTT	:::::::::0:0:13:::::18:-6:39:::	CD8
1558	TGTGCTCTGGGCGCGGGACAGGGCGGATCTGAAAAGCTGGTCTTT	TRAV9-2	0	TRAJ57	TRAV9	TRAJ57	CALGAGQGGSEKLVF	TGTGCTCTGGGCGCGGGACAGGGCGGATCTGAAAAGCTGGTCTTT	:::::::::0:-5:9:::::18:-5:45:::	CD8
1559	TGTGCTTATAGGGAGACCTCCTACGACAAGGTGATATTT	TRAV38-2DV8	0	TRAJ50	TRAV38	TRAJ50	CAYRETSYDKVIF	TGTGCTTATAGGGAGACCTCCTACGACAAGGTGATATTT	:::::::::0:-4:12:::::15:-5:39:::	CD8
1560	TGTGCTGGGGGGGGAACTGGGGCAAACAACCTCTTCTTT	TRAV21	0	TRAJ36	TRAV21	TRAJ36	CAGGGTGANNLFF	TGTGCTGGGGGGGGAACTGGGGCAAACAACCTCTTCTTT	:::::::::0:-5:7:::::14:-3:39:::	CD8
1561	TGTGCTCTGCCAAGGGGGGGTAGCAACTATAAACTGACATTT	TRAV9-2	0	TRAJ53	TRAV9	TRAJ53	CALPRGGSNYKLTF	TGTGCTCTGCCAAGGGGGGGTAGCAACTATAAACTGACATTT	:::::::::0:-5:9:::::12:-5:42:::	CD8
1562	TGTGCAGCAAGTCCTCTCTCAGGAACCTACAAATACATCTTT	TRAV13-1	0	TRAJ40	TRAV13	TRAJ40	CAASPLSGTYKYIF	TGTGCAGCAAGTCCTCTCTCAGGAACCTACAAATACATCTTT	:::::::::0:-1:12:::::17:-5:42:::	CD4
1563	TGTGCTGGGATGGATAGCAGCTATAAATTGATCTTC	TRAV1-2	0	TRAJ12	TRAV1	TRAJ12	CAGMDSSYKLIF	TGTGCTGGGATGGATAGCAGCTATAAATTGATCTTC	:::::::::0:-4:10:::::7:0:36:::	CD8
1564	TGTGCTGTGAGTGCCCTTTCTGGTGGCTACAATAAGCTGATTTTT	TRAV8-6	0	TRAJ4	TRAV8	TRAJ4	CAVSALSGGYNKLIF	TGTGCTGTGAGTGCCCTTTCTGGTGGCTACAATAAGCTGATTTTT	:::::::::0:-1:13:::::16:-3:45:::	CD4
1565	TGTGCTTATAGGAGCGCGGGGTCCGGTAACCAGTTCTATTTT	TRAV38-2DV8	0	TRAJ49	TRAV38	TRAJ49	CAYRSAGSGNQFYF	TGTGCTTATAGGAGCGCGGGGTCCGGTAACCAGTTCTATTTT	:::::::::0:0:16:::::22:-5:42:::	CD4
1566	TGTGCCGTGGAGGATGACAAGATCATCTTT	TRAV12-2	0	TRAJ30	TRAV12	TRAJ30	CAVEDDKIIF	TGTGCCGTGGAGGATGACAAGATCATCTTT	:::::::::0:-4:9:::::12:-8:30:::	CD8

## Sheet: edgeR TCRbeta donor M1
	CDR3.nucleotide.sequence	bestVGene	bestDGene	bestJGene	bestVFamily	bestJFamily	CDR3.amino.acid.sequence	nSeqCDR3	refPoints	phen
1	TGCACCAGCAGCCCTACATCATACTGGAATGAAAAACTGTTTTTT	TRBV1		TRBJ1-4	TRBV1*00	TRBJ1	CTSSPTSYWNEKLFF	TGCACCAGCAGCCCTACATCATACTGGAATGAAAAACTGTTTTTT	:::::::::0::13:::::27::45:::	CD8
2	TGCAGACGGGGGGGCGCAGATACGCAGTATTTT	TRBV20-1	TRBD1	TRBJ2-3	TRBV20	TRBJ2	CRRGGADTQYF	TGCAGACGGGGGGGCGCAGATACGCAGTATTTT	:::::::::0::5:5:::13:13::33:::	CD8
3	TGCAGCATATCGGACAGGGGGCTCACCGGGGAGCTGTTTTTT	TRBV29-1	TRBD1	TRBJ2-2	TRBV29	TRBJ2	CSISDRGLTGELFF	TGCAGCATATCGGACAGGGGGCTCACCGGGGAGCTGTTTTTT	:::::::::0::6:11::22:22:23::42:::	CD8
4	TGCAGCGCACCACTAGCGGGGGGGAACAATGAGCAGTTCTTC	TRBV29-1	TRBD2	TRBJ2-1	TRBV29	TRBJ2	CSAPLAGGNNEQFF	TGCAGCGCACCACTAGCGGGGGGGAACAATGAGCAGTTCTTC	:::::::::0::7:11::24:24:25::42:::	CD8
5	TGCAGCGCACTCGAGGGCTATGGCTACACCTTC	TRBV29-1	TRBD2	TRBJ1-2	TRBV29	TRBJ1	CSALEGYGYTF	TGCAGCGCACTCGAGGGCTATGGCTACACCTTC	:::::::::0::7:12::17:17:17::33:::	CD8
6	TGCAGCGCCCCACTAGCGGGGGGAGGGAATGAGCAGTTCTTC	TRBV29-1	TRBD2	TRBJ2-1	TRBV29	TRBJ2	CSAPLAGGGNEQFF	TGCAGCGCCCCACTAGCGGGGGGAGGGAATGAGCAGTTCTTC	:::::::::0::7:11::23:23:27::42:::	CD8
7	TGCAGCGCTTCCCCCGCCAGCTACAATGAGCAGTTCTTC	TRBV29-1	TRBD2	TRBJ2-1	TRBV29	TRBJ2	CSASPASYNEQFF	TGCAGCGCTTCCCCCGCCAGCTACAATGAGCAGTTCTTC	:::::::::0::7:12:::20:20::39:::	CD4
8	TGCAGCGGTTGGAAGTCGGGGGAATTCTACGAGCAGTACGTC	TRBV29-1	TRBD1	TRBJ2-7	TRBV29	TRBJ2	CSGWKSGEFYEQYV	TGCAGCGGTTGGAAGTCGGGGGAATTCTACGAGCAGTACGTC	:::::::::0::15:17:::22:26::42:::	CD4
9	TGCAGCGTAAACAGGGGGATAGGGAACACTGAAGCTTTCTTT	TRBV29-1	TRBD1	TRBJ1-1	TRBV29	TRBJ1	CSVNRGIGNTEAFF	TGCAGCGTAAACAGGGGGATAGGGAACACTGAAGCTTTCTTT	:::::::::0::8:10:::18:23::42:::	CD8
10	TGCAGCGTCACAACAGGGATCAGCTACGAGCAGTACTTC	TRBV29-1	TRBD1	TRBJ2-7	TRBV29	TRBJ2	CSVTTGISYEQYF	TGCAGCGTCACAACAGGGATCAGCTACGAGCAGTACTTC	:::::::::0::8:12:::18:23::39:::	CD8
11	TGCAGCGTCACAGCACCAGCTAACTATGGCTACACCTTC	TRBV29-1		TRBJ1-2	TRBV29	TRBJ1	CSVTAPANYGYTF	TGCAGCGTCACAGCACCAGCTAACTATGGCTACACCTTC	:::::::::0::8:::::17:19:39:::	CD4
12	TGCAGCGTCCCCCTGGGCGGTGGAGCCAATGAGCAGTTCTTC	TRBV29-1	TRBD1	TRBJ2-1	TRBV29	TRBJ2	CSVPLGGGANEQFF	TGCAGCGTCCCCCTGGGCGGTGGAGCCAATGAGCAGTTCTTC	:::::::::0::8:8:::15:26::42:::	CD8
13	TGCAGCGTCCCTCTAAGCGGGGGGGGTAATGAGCAGTTCTTC	TRBV29-1	TRBD2	TRBJ2-1	TRBV29	TRBJ2	CSVPLSGGGNEQFF	TGCAGCGTCCCTCTAAGCGGGGGGGGTAATGAGCAGTTCTTC	:::::::::0::8:15::25:25:27::42:::	CD8
14	TGCAGCGTCGGGATGACTAGCGGGGCCGAGGGGACCCAGTACTTC	TRBV29-1	TRBD2	TRBJ2-5	TRBV29	TRBJ2	CSVGMTSGAEGTQYF	TGCAGCGTCGGGATGACTAGCGGGGCCGAGGGGACCCAGTACTTC	:::::::::0::8:14:::24:32::45:::	CD4
15	TGCAGCGTCTCCCTAAACGCGGGAAACACTGAAGCTTTCTTT	TRBV29-1	TRBD2	TRBJ1-1	TRBV29	TRBJ1	CSVSLNAGNTEAFF	TGCAGCGTCTCCCTAAACGCGGGAAACACTGAAGCTTTCTTT	:::::::::0::8:18:::24:24::42:::	CD4
16	TGCAGCGTGCAGGACATAGACACAGATACGCAGTATTTT	TRBV29-1	TRBD1	TRBJ2-3	TRBV29	TRBJ2	CSVQDIDTDTQYF	TGCAGCGTGCAGGACATAGACACAGATACGCAGTATTTT	:::::::::0::8:11:::16:16:17:39:::	CD4
17	TGCAGCGTGGGGGGGACTAGCGGACGGGGTACAGATACGCAGTATTTT	TRBV29-1	TRBD2	TRBJ2-3	TRBV29	TRBJ2	CSVGGTSGRGTDTQYF	TGCAGCGTGGGGGGGACTAGCGGACGGGGTACAGATACGCAGTATTTT	:::::::::0::8:12:12::23:30::48:::	CD8
18	TGCAGCGTTGAAGATTTTCCCACTGAAGCTTTCTTT	TRBV29-1		TRBJ1-1	TRBV29	TRBJ1	CSVEDFPTEAFF	TGCAGCGTTGAAGATTTTCCCACTGAAGCTTTCTTT	:::::::::0:14:19:::::20::36:::	CD8
19	TGCAGCGTTGAAGCGCACAGGGGCACCGGGGAGCTGTTTTTT	TRBV29-1	TRBD1	TRBJ2-2	TRBV29	TRBJ2	CSVEAHRGTGELFF	TGCAGCGTTGAAGCGCACAGGGGCACCGGGGAGCTGTTTTTT	:::::::::0::13:16:::23:23::42:::	CD4
20	TGCAGCGTTGACAGGAGGTCTGATGAAGCTTTCTTT	TRBV29-1	TRBD2	TRBJ1-1	TRBV29	TRBJ1	CSVDRRSDEAFF	TGCAGCGTTGACAGGAGGTCTGATGAAGCTTTCTTT	:::::::::0::11:13:::18:23::36:::	CD8
21	TGCAGCGTTGAGTCGACGGGACAAGGCACAGATACGCAGTATTTT	TRBV29-1	TRBD1	TRBJ2-3	TRBV29	TRBJ2	CSVESTGQGTDTQYF	TGCAGCGTTGAGTCGACGGGACAAGGCACAGATACGCAGTATTTT	:::::::::0::11:16:17::23:25::45:::	0
22	TGCAGCGTTGGAGAGCCGACCCCTTATGGCTACACCTTC	TRBV29-1	TRBD1	TRBJ1-2	TRBV29	TRBJ1	CSVGEPTPYGYTF	TGCAGCGTTGGAGAGCCGACCCCTTATGGCTACACCTTC	:::::::::0:14:14:16::17:24:24::39:::	CD4
23	TGCAGCGTTGGAGGCGGGGTAAAGTGGGGCTACACCTTC	TRBV29-1	TRBD2	TRBJ1-2	TRBV29	TRBJ1	CSVGGGVKWGYTF	TGCAGCGTTGGAGGCGGGGTAAAGTGGGGCTACACCTTC	:::::::::0::13:13:::18:27::39:::	CD4
24	TGCAGCGTTGGGGAGGGGGTTGCCTACGAGCAGTACTTC	TRBV29-1	TRBD2	TRBJ2-7	TRBV29	TRBJ2	CSVGEGVAYEQYF	TGCAGCGTTGGGGAGGGGGTTGCCTACGAGCAGTACTTC	:::::::::0::10:10::17:17:22::39:::	CD8
25	TGCAGCGTTGTCGTCTCGAGGGGGGAAGAGACCCAGTACTTC	TRBV29-1	TRBD1	TRBJ2-5	TRBV29	TRBJ2	CSVVVSRGEETQYF	TGCAGCGTTGTCGTCTCGAGGGGGGAAGAGACCCAGTACTTC	:::::::::0::10:18:::24:25::42:::	CD4
26	TGCAGCGTTTGGGACACAACTAACTATGGCTACACCTTC	TRBV29-1	TRBD1	TRBJ1-2	TRBV29	TRBJ1	CSVWDTTNYGYTF	TGCAGCGTTTGGGACACAACTAACTATGGCTACACCTTC	:::::::::0::9:10:10::16:19:19:39:::	CD4
27	TGCAGTGAAAAGGGGGGGAGCTCCTACGAGCAGTACGTC	TRBV20-1	TRBD1	TRBJ2-7	TRBV20	TRBJ2	CSEKGGSSYEQYV	TGCAGTGAAAAGGGGGGGAGCTCCTACGAGCAGTACGTC	:::::::::0::7:10:::16:16:20:39:::	CD8
28	TGCAGTGCAACGGGGAACCGGGGCACAGATACGCAGTATTTT	TRBV20-1	TRBD1	TRBJ2-3	TRBV20	TRBJ2	CSATGNRGTDTQYF	TGCAGTGCAACGGGGAACCGGGGCACAGATACGCAGTATTTT	:::::::::0::8:17:19::22:22::42:::	CD8
29	TGCAGTGCAGCGGGCCAGCGGGGGGCAGATACGCAGTATTTT	TRBV20-1	TRBD2	TRBJ2-3	TRBV20	TRBJ2	CSAAGQRGADTQYF	TGCAGTGCAGCGGGCCAGCGGGGGGCAGATACGCAGTATTTT	:::::::::0::8:10:11:25:25:25::42:::	CD8
30	TGCAGTGCAGGACTAGCGGGGGGCCTTGAGTTCACAGATACGCAGTATTTT	TRBV20-1	TRBD2	TRBJ2-3	TRBV20	TRBJ2	CSAGLAGGLEFTDTQYF	TGCAGTGCAGGACTAGCGGGGGGCCTTGAGTTCACAGATACGCAGTATTTT	:::::::::0::8:9::23:25:32::51:::	0
31	TGCAGTGCCAACAGGGGAGCCACTGAAGCTTTCTTT	TRBV20-1	TRBD1	TRBJ1-1	TRBV20	TRBJ1	CSANRGATEAFF	TGCAGTGCCAACAGGGGAGCCACTGAAGCTTTCTTT	:::::::::0::8:10:::17:20::36:::	CD8
32	TGCAGTGCCCCCCAGGGGACCGGGGGGCACGACACTGAAGCTTTCTTT	TRBV20-1	TRBD1	TRBJ1-1	TRBV20	TRBJ1	CSAPQGTGGHDTEAFF	TGCAGTGCCCCCCAGGGGACCGGGGGGCACGACACTGAAGCTTTCTTT	:::::::::0::8:15:15::26:31::48:::	CD4
33	TGCAGTGCCCCCCGGCGGCAGGATGAGCAGTTCTTC	TRBV20-1	TRBD1	TRBJ2-1	TRBV20	TRBJ2	CSAPRRQDEQFF	TGCAGTGCCCCCCGGCGGCAGGATGAGCAGTTCTTC	:::::::::0::8:10:13::22:22::36:::	CD8
34	TGCAGTGCCCCCGACAGGGAATCGGCGTTAAGGGAGACCCAGTACTTC	TRBV20-1	TRBD1	TRBJ2-5	TRBV20	TRBJ2	CSAPDRESALRETQYF	TGCAGTGCCCCCGACAGGGAATCGGCGTTAAGGGAGACCCAGTACTTC	:::::::::0::8:12:::19:33::48:::	CD8
35	TGCAGTGCCCCCGTGTACAGGGGTGCAGATACGCAGTATTTT	TRBV20-1	TRBD1	TRBJ2-3	TRBV20	TRBJ2	CSAPVYRGADTQYF	TGCAGTGCCCCCGTGTACAGGGGTGCAGATACGCAGTATTTT	:::::::::0::8:9:12::23:25::42:::	CD8
36	TGCAGTGCCCCGACTAGCGGGGGGGACAATGAGCAGTTCTTC	TRBV20-1	TRBD2	TRBJ2-1	TRBV20	TRBJ2	CSAPTSGGDNEQFF	TGCAGTGCCCCGACTAGCGGGGGGGACAATGAGCAGTTCTTC	:::::::::0::8:11::25:25:25::42:::	CD8
37	TGCAGTGCCCCGAGACGGACGGATGAGCAGTTCTTC	TRBV20-1	TRBD1	TRBJ2-1	TRBV20	TRBJ2	CSAPRRTDEQFF	TGCAGTGCCCCGAGACGGACGGATGAGCAGTTCTTC	:::::::::0::8:8:11::16:22::36:::	CD8
38	TGCAGTGCCCCGCCCCCGGGAGGACAGAGCTCCTACAATGAGCAGTTCTTC	TRBV20-1	TRBD1	TRBJ2-1	TRBV20	TRBJ2	CSAPPPGGQSSYNEQFF	TGCAGTGCCCCGCCCCCGGGAGGACAGAGCTCCTACAATGAGCAGTTCTTC	:::::::::0::8:14:17::21:26:29:51:::	CD4
39	TGCAGTGCCCCGCCCGCAACTAGCGGGGGAACAACACAAGAGACCCAGTACTTC	TRBV20-1	TRBD2	TRBJ2-5	TRBV20	TRBJ2	CSAPPATSGGTTQETQYF	TGCAGTGCCCCGCCCGCAACTAGCGGGGGAACAACACAAGAGACCCAGTACTTC	:::::::::0::8:12:15::27:36::54:::	CD4
40	TGCAGTGCCCCGTCCGGAGGGGGCCTTAATGAGCAGTTCTTC	TRBV20-1	TRBD1	TRBJ2-1	TRBV20	TRBJ2	CSAPSGGGLNEQFF	TGCAGTGCCCCGTCCGGAGGGGGCCTTAATGAGCAGTTCTTC	:::::::::0::8:17::24:24:27::42:::	CD8
41	TGCAGTGCCCCTCTAGCGGGGGGGGGGAATGAGCAGTTCTTC	TRBV20-1	TRBD2	TRBJ2-1	TRBV20	TRBJ2	CSAPLAGGGNEQFF	TGCAGTGCCCCTCTAGCGGGGGGGGGGAATGAGCAGTTCTTC	:::::::::0::8:12::24:24:27::42:::	CD8
42	TGCAGTGCCCTAGGAAAGCGGGGCACAGATACGCAGTATTTT	TRBV20-1	TRBD2	TRBJ2-3	TRBV20	TRBJ2	CSALGKRGTDTQYF	TGCAGTGCCCTAGGAAAGCGGGGCACAGATACGCAGTATTTT	:::::::::0::8:16:::22:22::42:::	CD8
43	TGCAGTGCCCTCGGGGGGGAAGCGTACGAGCAGTACTTC	TRBV20-1	TRBD2	TRBJ2-7	TRBV20	TRBJ2	CSALGGEAYEQYF	TGCAGTGCCCTCGGGGGGGAAGCGTACGAGCAGTACTTC	:::::::::0::8:11::19:19:24::39:::	CD4
44	TGCAGTGCCGCTATGGGGCAGTACGTC	TRBV20-1	TRBD2	TRBJ2-7	TRBV20	TRBJ2	CSAAMGQYV	TGCAGTGCCGCTATGGGGCAGTACGTC	:::::::::0::8:8:::13:17::27:::	CD8
45	TGCAGTGCCGGGACAGCGGCAACTAATGAAAAACTGTTTTTT	TRBV20-1	TRBD1	TRBJ1-4	TRBV20	TRBJ1	CSAGTAATNEKLFF	TGCAGTGCCGGGACAGCGGCAACTAATGAAAAACTGTTTTTT	:::::::::0::8:8:9::16:18:19:42:::	CD8
46	TGCAGTGCCGGGTTGGGCCTCCCCTACGAGCAGTACTTC	TRBV20-1	TRBD2	TRBJ2-7	TRBV20	TRBJ2	CSAGLGLPYEQYF	TGCAGTGCCGGGTTGGGCCTCCCCTACGAGCAGTACTTC	:::::::::0::8:8::16:22:22::39:::	CD8
47	TGCAGTGCCGTCCTTCCGGGACTAGCGGGTTACAATGAGCAGTTCTTC	TRBV20-1	TRBD2	TRBJ2-1	TRBV20	TRBJ2	CSAVLPGLAGYNEQFF	TGCAGTGCCGTCCTTCCGGGACTAGCGGGTTACAATGAGCAGTTCTTC	:::::::::0::8:15:17::29:30::48:::	CD8
48	TGCAGTGCCTTAGGAGCCCATTTAAATGAAAAACTGTTTTTT	TRBV20-1		TRBJ1-4	TRBV20	TRBJ1	CSALGAHLNEKLFF	TGCAGTGCCTTAGGAGCCCATTTAAATGAAAAACTGTTTTTT	:::::::::0::8:::::24::42:::	CD8
49	TGCAGTGCGATGACTAGCTCGTGGCAGACCCAGTACTTC	TRBV20-1	TRBD2	TRBJ2-5	TRBV20	TRBJ2	CSAMTSSWQTQYF	TGCAGTGCGATGACTAGCTCGTGGCAGACCCAGTACTTC	:::::::::0::8:11:::18:25::39:::	CD4
50	TGCAGTGCGCCTGACAGGGGGCTTAGGAGCTACACCTTC	TRBV20-1	TRBD1	TRBJ1-2	TRBV20	TRBJ1	CSAPDRGLRSYTF	TGCAGTGCGCCTGACAGGGGGCTTAGGAGCTACACCTTC	:::::::::0::8:12::22:22:28::39:::	CD4
51	TGCAGTGCGGCAAGGGGACAGGGGAGCAGCGATGAGCAGTTCTTC	TRBV20-1	TRBD1	TRBJ2-1	TRBV20	TRBJ2	CSAARGQGSSDEQFF	TGCAGTGCGGCAAGGGGACAGGGGAGCAGCGATGAGCAGTTCTTC	:::::::::0::8:14:14::24:31::45:::	CD4
52	TGCAGTGCTAAATTATCCTCAGGGATTAGCAATCAGCCCCAGCATTTT	TRBV20-1	TRBD1	TRBJ1-5	TRBV20	TRBJ1	CSAKLSSGISNQPQHF	TGCAGTGCTAAATTATCCTCAGGGATTAGCAATCAGCCCCAGCATTTT	:::::::::0::10:19:::24:26:26:48:::	CD4
53	TGCAGTGCTAACCGGGACCTAGGGGTAAACACCATATATTTT	TRBV20-1	TRBD2	TRBJ1-3	TRBV20	TRBJ1	CSANRDLGVNTIYF	TGCAGTGCTAACCGGGACCTAGGGGTAAACACCATATATTTT	:::::::::0::10:11:13::25:26::42:::	CD4
54	TGCAGTGCTACCTCATGGGGGAGCTCCTACAATGAGCAGTTCTTC	TRBV20-1		TRBJ2-1	TRBV20	TRBJ2	CSATSWGSSYNEQFF	TGCAGTGCTACCTCATGGGGGAGCTCCTACAATGAGCAGTTCTTC	:::::::::0::10:::::19:23:45:::	CD8
55	TGCAGTGCTACCTCCCTGGACAGGGAACCTTTATCACTGGGCAATGAGCAGTTCTTC	TRBV20-1	TRBD1	TRBJ2-1	TRBV20	TRBJ2	CSATSLDREPLSLGNEQFF	TGCAGTGCTACCTCCCTGGACAGGGAACCTTTATCACTGGGCAATGAGCAGTTCTTC	:::::::::0::10:12:16::25:41::57:::	CD8
56	TGCAGTGCTACTCGACTAGCGGGGGGGTCTTACAATGAGCAGTTCTTC	TRBV20-1	TRBD2	TRBJ2-1	TRBV20	TRBJ2	CSATRLAGGSYNEQFF	TGCAGTGCTACTCGACTAGCGGGGGGGTCTTACAATGAGCAGTTCTTC	:::::::::0::10:13::27:27:27::48:::	CD4
57	TGCAGTGCTAGAAGCTCCGGGACAGGGGCTGGAAACACCATATATTTT	TRBV20-1	TRBD1	TRBJ1-3	TRBV20	TRBJ1	CSARSSGTGAGNTIYF	TGCAGTGCTAGAAGCTCCGGGACAGGGGCTGGAAACACCATATATTTT	:::::::::0::12:16:18::28:28::48:::	CD4
58	TGCAGTGCTAGACACCCAAATCTGGCTAGCACCTACAATGAGCAGTTCTTC	TRBV20-1		TRBJ2-1	TRBV20	TRBJ2	CSARHPNLASTYNEQFF	TGCAGTGCTAGACACCCAAATCTGGCTAGCACCTACAATGAGCAGTTCTTC	:::::::::0::12:::::27:29:51:::	0
59	TGCAGTGCTAGAGAAGACTTGACAGGGACCTACAATGAGCAGTTCTTC	TRBV20-1	TRBD1	TRBJ2-1	TRBV20	TRBJ2	CSAREDLTGTYNEQFF	TGCAGTGCTAGAGAAGACTTGACAGGGACCTACAATGAGCAGTTCTTC	:::::::::0:14:14:20:::27:28::48:::	CD8
60	TGCAGTGCTAGAGACCGGGACAGGGACTACAATGAGCAGTTCTTC	TRBV20-1	TRBD1	TRBJ2-1	TRBV20	TRBJ2	CSARDRDRDYNEQFF	TGCAGTGCTAGAGACCGGGACAGGGACTACAATGAGCAGTTCTTC	:::::::::0:14:14:14:16::25:26::45:::	CD8
61	TGCAGTGCTAGAGACTTCATCCGCACAGATACGCAGTATTTT	TRBV20-1		TRBJ2-3	TRBV20	TRBJ2	CSARDFIRTDTQYF	TGCAGTGCTAGAGACTTCATCCGCACAGATACGCAGTATTTT	:::::::::0:14:14:::::22::42:::	CD8
62	TGCAGTGCTAGAGATCTTATGAACACCGGGGAGCTGTTTTTT	TRBV20-1		TRBJ2-2	TRBV20	TRBJ2	CSARDLMNTGELFF	TGCAGTGCTAGAGATCTTATGAACACCGGGGAGCTGTTTTTT	:::::::::0:14:17:::::20::42:::	0
63	TGCAGTGCTAGAGATGAGGGTTCTAACACCATATATTTT	TRBV20-1	TRBD2	TRBJ1-3	TRBV20	TRBJ1	CSARDEGSNTIYF	TGCAGTGCTAGAGATGAGGGTTCTAACACCATATATTTT	:::::::::0:14:15:15::20:20:24::39:::	CD8
64	TGCAGTGCTAGAGATTACGGCAGAGCCATATATGGCTACACCTTC	TRBV20-1		TRBJ1-2	TRBV20	TRBJ1	CSARDYGRAIYGYTF	TGCAGTGCTAGAGATTACGGCAGAGCCATATATGGCTACACCTTC	:::::::::0:14:15:::::30::45:::	CD4
65	TGCAGTGCTAGAGCACAGGGGGACTATGGCTACACCTTC	TRBV20-1	TRBD1	TRBJ1-2	TRBV20	TRBJ1	CSARAQGDYGYTF	TGCAGTGCTAGAGCACAGGGGGACTATGGCTACACCTTC	:::::::::0::13:14:::22:22::39:::	CD4
66	TGCAGTGCTAGAGGACTAGCGGGGGCCTTAGGCGTTGGCGAGCAGTACTTC	TRBV20-1	TRBD2	TRBJ2-7	TRBV20	TRBJ2	CSARGLAGALGVGEQYF	TGCAGTGCTAGAGGACTAGCGGGGGCCTTAGGCGTTGGCGAGCAGTACTTC	:::::::::0::13:13:::23:38::51:::	CD8
67	TGCAGTGCTAGAGGGGGACAGGGGGCTCCAGGGTGGTCCTACAATGAGCAGTTCTTC	TRBV20-1	TRBD1	TRBJ2-1	TRBV20	TRBJ2	CSARGGQGAPGWSYNEQFF	TGCAGTGCTAGAGGGGGACAGGGGGCTCCAGGGTGGTCCTACAATGAGCAGTTCTTC	:::::::::0::13:14:14:26:29:36::57:::	CD4
68	TGCAGTGCTAGATTCGGCGGTGCCACAGATACGCAGTATTTT	TRBV20-1		TRBJ2-3	TRBV20	TRBJ2	CSARFGGATDTQYF	TGCAGTGCTAGATTCGGCGGTGCCACAGATACGCAGTATTTT	:::::::::0::12:::::23::42:::	CD4
69	TGCAGTGCTAGCACACAGGGAGCTTACGAGCAGTACGTC	TRBV20-1		TRBJ2-7	TRBV20	TRBJ2	CSASTQGAYEQYV	TGCAGTGCTAGCACACAGGGAGCTTACGAGCAGTACGTC	:::::::::0::11:::::18:22:39:::	CD8
70	TGCAGTGCTAGCCAGGCCGCGGCCTACGAGCAGTACTTC	TRBV20-1		TRBJ2-7	TRBV20	TRBJ2	CSASQAAAYEQYF	TGCAGTGCTAGCCAGGCCGCGGCCTACGAGCAGTACTTC	:::::::::0::11:::::22::39:::	CD8
71	TGCAGTGCTAGCCTTAGCGGGGGGGCCGGGGGTGAGCAGTTCTTC	TRBV20-1	TRBD2	TRBJ2-1	TRBV20	TRBJ2	CSASLSGGAGGEQFF	TGCAGTGCTAGCCTTAGCGGGGGGGCCGGGGGTGAGCAGTTCTTC	:::::::::0::11:14::25:27:32::45:::	CD8
72	TGCAGTGCTAGCGGAAGACTAGACGGATCCTACGAGCAGTACTTC	TRBV20-1	TRBD2	TRBJ2-7	TRBV20	TRBJ2	CSASGRLDGSYEQYF	TGCAGTGCTAGCGGAAGACTAGACGGATCCTACGAGCAGTACTTC	:::::::::0::11:16:::26:27::45:::	CD8
73	TGCAGTGCTAGCGTGTGGGGGGGCCCCGGGGAGCTGTTTTTT	TRBV20-1	TRBD1	TRBJ2-2	TRBV20	TRBJ2	CSASVWGGPGELFF	TGCAGTGCTAGCGTGTGGGGGGGCCCCGGGGAGCTGTTTTTT	:::::::::0::11:16::22:25:25::42:::	CD4
74	TGCAGTGCTAGGCCCGACAGCAGCTCCTACGAGCAGTACTTC	TRBV20-1		TRBJ2-7	TRBV20	TRBJ2	CSARPDSSSYEQYF	TGCAGTGCTAGGCCCGACAGCAGCTCCTACGAGCAGTACTTC	:::::::::0::11:::::18:23:42:::	CD4
75	TGCAGTGCTAGGGCTAGCGGGGGCCCTGTCCCATACACAGATACGCAGTATTTT	TRBV20-1	TRBD2	TRBJ2-3	TRBV20	TRBJ2	CSARASGGPVPYTDTQYF	TGCAGTGCTAGGGCTAGCGGGGGCCCTGTCCCATACACAGATACGCAGTATTTT	:::::::::0::11:13::23:27:35::54:::	CD4
76	TGCAGTGCTAGGGCTTGGGGAGGGGGCGGTAGAATAGATGGAAACACCATATATTTT	TRBV20-1	TRBD1	TRBJ1-3	TRBV20	TRBJ1	CSARAWGGGGRIDGNTIYF	TGCAGTGCTAGGGCTTGGGGAGGGGGCGGTAGAATAGATGGAAACACCATATATTTT	:::::::::0::11:20::27:28:38::57:::	CD8
77	TGCAGTGCTAGGGGGGCTAGCACCGGGGGCACCGGGGAGCTGTTTTTT	TRBV20-1	TRBD2	TRBJ2-2	TRBV20	TRBJ2	CSARGASTGGTGELFF	TGCAGTGCTAGGGGGGCTAGCACCGGGGGCACCGGGGAGCTGTTTTTT	:::::::::0::11:15:24::27:29::48:::	CD4
78	TGCAGTGCTAGGGTAGGACAGGGGCCTTCAGATACGCAGTATTTT	TRBV20-1	TRBD1	TRBJ2-3	TRBV20	TRBJ2	CSARVGQGPSDTQYF	TGCAGTGCTAGGGTAGGACAGGGGCCTTCAGATACGCAGTATTTT	:::::::::0::11:15:::24:28::45:::	CD4
79	TGCAGTGCTAGGTTCGCACAGGGTACCAATGAGCAGTTCTTC	TRBV20-1	TRBD1	TRBJ2-1	TRBV20	TRBJ2	CSARFAQGTNEQFF	TGCAGTGCTAGGTTCGCACAGGGTACCAATGAGCAGTTCTTC	:::::::::0::11:17:::23:26::42:::	CD4
80	TGCAGTGCTAGTGAAGGGACTAGCGGGGGGGCGTACGAGCAGTACGTC	TRBV20-1	TRBD2	TRBJ2-7	TRBV20	TRBJ2	CSASEGTSGGAYEQYV	TGCAGTGCTAGTGAAGGGACTAGCGGGGGGGCGTACGAGCAGTACGTC	:::::::::0:14:14:15:15:31:32:33::48:::	CD8
81	TGCAGTGCTAGTGAGGGAACTTCCTACGAGCAGTACTTC	TRBV20-1		TRBJ2-7	TRBV20	TRBJ2	CSASEGTSYEQYF	TGCAGTGCTAGTGAGGGAACTTCCTACGAGCAGTACTTC	:::::::::0:14:14:::::5:19:39:::	CD8
82	TGCAGTGCTATCCTAGCGGGGAATCAAGAGACCCAGTACTTC	TRBV20-1	TRBD2	TRBJ2-5	TRBV20	TRBJ2	CSAILAGNQETQYF	TGCAGTGCTATCCTAGCGGGGAATCAAGAGACCCAGTACTTC	:::::::::0::10:12:::20:24::42:::	CD4
83	TGCAGTGCTCCACGGACACCAGGGCCAGACAATGAGCAGTTCTTC	TRBV20-1	TRBD2	TRBJ2-1	TRBV20	TRBJ2	CSAPRTPGPDNEQFF	TGCAGTGCTCCACGGACACCAGGGCCAGACAATGAGCAGTTCTTC	:::::::::0::9:20::24:26:28::45:::	CD4
84	TGCAGTGCTCCAGACAGGCGTAACACCGGGGAGCTGTTTTTT	TRBV20-1	TRBD1	TRBJ2-2	TRBV20	TRBJ2	CSAPDRRNTGELFF	TGCAGTGCTCCAGACAGGCGTAACACCGGGGAGCTGTTTTTT	:::::::::0::9:12:::17:17:18:42:::	CD4
85	TGCAGTGCTCCCACTAGCGGGGGTCACAATGAGCAGTTCTTC	TRBV20-1	TRBD2	TRBJ2-1	TRBV20	TRBJ2	CSAPTSGGHNEQFF	TGCAGTGCTCCCACTAGCGGGGGTCACAATGAGCAGTTCTTC	:::::::::0::9:12:::21:25::42:::	CD8
86	TGCAGTGCTCCCGGACAGCTCTTGGGGGAGACCCAGTACTTC	TRBV20-1	TRBD1	TRBJ2-5	TRBV20	TRBJ2	CSAPGQLLGETQYF	TGCAGTGCTCCCGGACAGCTCTTGGGGGAGACCCAGTACTTC	:::::::::0::9:9:12::18:27::42:::	CD8
87	TGCAGTGCTCCCTGGGGCGCGGGGACTGAAGCTTTCTTT	TRBV20-1	TRBD1	TRBJ1-1	TRBV20	TRBJ1	CSAPWGAGTEAFF	TGCAGTGCTCCCTGGGGCGCGGGGACTGAAGCTTTCTTT	:::::::::0::9:13::18:20:24::39:::	CD8
88	TGCAGTGCTCCGACTAGCGGGGGGGCTAATGAGCAGTTCTTC	TRBV20-1	TRBD2	TRBJ2-1	TRBV20	TRBJ2	CSAPTSGGANEQFF	TGCAGTGCTCCGACTAGCGGGGGGGCTAATGAGCAGTTCTTC	:::::::::0::9:11::25:26:27::42:::	CD8
89	TGCAGTGCTCCGACTGGCGGGGGGTCCAACGAGCAGTACTTC	TRBV20-1	TRBD2	TRBJ2-7	TRBV20	TRBJ2	CSAPTGGGSNEQYF	TGCAGTGCTCCGACTGGCGGGGGGTCCAACGAGCAGTACTTC	:::::::::0::9:11::24:24:24::42:::	CD8
90	TGCAGTGCTGAGAAAGAGTCGTGGAACGAGCAGTTCTTC	TRBV20-1		TRBJ2-1	TRBV20	TRBJ2	CSAEKESWNEQFF	TGCAGTGCTGAGAAAGAGTCGTGGAACGAGCAGTTCTTC	:::::::::0:13:13:::::24::39:::	CD4
91	TGCAGTGCTGATACAAATACAGGGGCTAGCAATCAGCCCCAGCATTTT	TRBV20-1	TRBD1	TRBJ1-5	TRBV20	TRBJ1	CSADTNTGASNQPQHF	TGCAGTGCTGATACAAATACAGGGGCTAGCAATCAGCCCCAGCATTTT	:::::::::0::9:18:::25:26:26:48:::	CD4
92	TGCAGTGCTGGGGACAGTGTGAATGAGCAGTTCTTC	TRBV20-1	TRBD1	TRBJ2-1	TRBV20	TRBJ2	CSAGDSVNEQFF	TGCAGTGCTGGGGACAGTGTGAATGAGCAGTTCTTC	:::::::::0::9:10:10::17:21::36:::	CD8
93	TGCAGTGCTGGGGAGGGCGAGGGCCAGCCCCAGCATTTT	TRBV20-1	TRBD2	TRBJ1-5	TRBV20	TRBJ1	CSAGEGEGQPQHF	TGCAGTGCTGGGGAGGGCGAGGGCCAGCCCCAGCATTTT	:::::::::0::9:10::17:18:24::39:::	CD8
94	TGCAGTGCTGGTACAGGGTTCCTTAATTCACCCCTCCACTTT	TRBV20-1	TRBD1	TRBJ1-6	TRBV20	TRBJ1	CSAGTGFLNSPLHF	TGCAGTGCTGGTACAGGGTTCCTTAATTCACCCCTCCACTTT	:::::::::0::9:9:9::18:19::42:::	CD8
95	TGCAGTGCTGTGCGGGGACAGGGAAGTTCGGATACGCAGTATTTT	TRBV20-1	TRBD1	TRBJ2-3	TRBV20	TRBJ2	CSAVRGQGSSDTQYF	TGCAGTGCTGTGCGGGGACAGGGAAGTTCGGATACGCAGTATTTT	:::::::::0::9:14:14::23:30::45:::	CD4
96	TGCAGTGCTTATGGACAGGGACCAGAAAAACTGTTTTTT	TRBV20-1	TRBD1	TRBJ1-4	TRBV20	TRBJ1	CSAYGQGPEKLFF	TGCAGTGCTTATGGACAGGGACCAGAAAAACTGTTTTTT	:::::::::0::9:12:::20:24::39:::	CD4
97	TGCAGTGCTTCAGACCGGGACAGGGGAAACTACGAGCAGTACGTC	TRBV20-1	TRBD1	TRBJ2-7	TRBV20	TRBJ2	CSASDRDRGNYEQYV	TGCAGTGCTTCAGACCGGGACAGGGGAAACTACGAGCAGTACGTC	:::::::::0::9:14:16::26:29::45:::	CD8
98	TGCAGTGCTTCGATGGAGGCAGCCAGCACTTACGAGCAGTACTTC	TRBV20-1	TRBD2	TRBJ2-7	TRBV20	TRBJ2	CSASMEAASTYEQYF	TGCAGTGCTTCGATGGAGGCAGCCAGCACTTACGAGCAGTACTTC	:::::::::0::9:14:::19:24:26:45:::	CD8
99	TGCAGTGCTTCTGCCGGGACAGAATCCAGCTCCTACGAGCAGTACTTC	TRBV20-1	TRBD1	TRBJ2-7	TRBV20	TRBJ2	CSASAGTESSSYEQYF	TGCAGTGCTTCTGCCGGGACAGAATCCAGCTCCTACGAGCAGTACTTC	:::::::::0::9:13:15::22:27:29:48:::	CD8
100	TGCAGTGGGCAGCCCGAAAGCTCCTACGAGCAGTACTTC	TRBV20-1		TRBJ2-7	TRBV20	TRBJ2	CSGQPESSYEQYF	TGCAGTGGGCAGCCCGAAAGCTCCTACGAGCAGTACTTC	:::::::::0::7:::::18:20:39:::	CD8
101	TGCAGTGTAGCCGGGACCCCAACCTACGAGCAGTACTTC	TRBV20-1	TRBD1	TRBJ2-7	TRBV20	TRBJ2	CSVAGTPTYEQYF	TGCAGTGTAGCCGGGACCCCAACCTACGAGCAGTACTTC	:::::::::0::10:10:12::17:22::39:::	CD4
102	TGCAGTGTCCAGGGGGAGGTCGGGGAGCTGTTTTTT	TRBV20-1	TRBD1	TRBJ2-2	TRBV20	TRBJ2	CSVQGEVGELFF	TGCAGTGTCCAGGGGGAGGTCGGGGAGCTGTTTTTT	:::::::::0::7:9:::16:20::36:::	CD4
103	TGCAGTGTCCCGACTAGCGGGGGCTACAATGAGCAGTTCTTC	TRBV20-1	TRBD2	TRBJ2-1	TRBV20	TRBJ2	CSVPTSGGYNEQFF	TGCAGTGTCCCGACTAGCGGGGGCTACAATGAGCAGTTCTTC	:::::::::0::7:11:::21:23::42:::	CD8
104	TGCAGTGTGCGGACAGGGTACAATGAGCAGTTCTTC	TRBV20-1	TRBD1	TRBJ2-1	TRBV20	TRBJ2	CSVRTGYNEQFF	TGCAGTGTGCGGACAGGGTACAATGAGCAGTTCTTC	:::::::::0::7:10:::18:18::36:::	CD4
105	TGCAGTGTTCCGACTAGCGGGGGGGAAAACATTCAGTACTTC	TRBV20-1	TRBD2	TRBJ2-4	TRBV20	TRBJ2	CSVPTSGGENIQYF	TGCAGTGTTCCGACTAGCGGGGGGGAAAACATTCAGTACTTC	:::::::::0::7:11::25:25:25::42:::	CD8
106	TGCATTCCTACGGGGGCAGGGATCTCTGGAAACACCATATATTTT	TRBV20-1	TRBD1	TRBJ1-3	TRBV20	TRBJ1	CIPTGAGISGNTIYF	TGCATTCCTACGGGGGCAGGGATCTCTGGAAACACCATATATTTT	:::::::::0::10:11::17:17:20:23:45:::	CD8
107	TGCGCCACTCGGGACAGTGGGAACATTCAGTACTTC	TRBV5-1	TRBD1	TRBJ2-4	TRBV5	TRBJ2	CATRDSGNIQYF	TGCGCCACTCGGGACAGTGGGAACATTCAGTACTTC	:::::::::0::7:9:10::21:21::36:::	CD4
108	TGCGCCAGCAACACCGGAGTAGCGGGGGAGGACTACAATGAGCAGTTCTTC	TRBV5-1	TRBD2	TRBJ2-1	TRBV5	TRBJ2	CASNTGVAGEDYNEQFF	TGCGCCAGCAACACCGGAGTAGCGGGGGAGGACTACAATGAGCAGTTCTTC	:::::::::0::10:15:::26:32::51:::	CD4
109	TGCGCCAGCAACGATCCTAGCGGGGGCAAGACCCAGTACTTC	TRBV5-1	TRBD2	TRBJ2-5	TRBV5	TRBJ2	CASNDPSGGKTQYF	TGCGCCAGCAACGATCCTAGCGGGGGCAAGACCCAGTACTTC	:::::::::0::10:16:::24:28::42:::	CD4
110	TGCGCCAGCACCGAGTAGGAAGCTTTCTTT	TRBV5-1		TRBJ1-1	TRBV5	TRBJ1	CASTE*EAFF	TGCGCCAGCACCGAGTAGGAAGCTTTCTTT	:::::::::0::10:::::18::30:::	CD8
111	TGCGCCAGCACTAACCTCGGGACAGGGGCGTTTTACGAGCAGTACTTC	TRBV10-2	TRBD1	TRBJ2-7	TRBV10	TRBJ2	CASTNLGTGAFYEQYF	TGCGCCAGCACTAACCTCGGGACAGGGGCGTTTTACGAGCAGTACTTC	:::::::::0::10:17:18::28:33::48:::	CD4
112	TGCGCCAGCAGAACGGACAGGGTGAGGTATGGCTACACCTTC	TRBV5-1	TRBD1	TRBJ1-2	TRBV5	TRBJ1	CASRTDRVRYGYTF	TGCGCCAGCAGAACGGACAGGGTGAGGTATGGCTACACCTTC	:::::::::0::11:14:::22:27::42:::	CD8
113	TGCGCCAGCAGAATGGGACAGGGGGCATCAGATACGCAGTATTTT	TRBV10-1	TRBD1	TRBJ2-3	TRBV10	TRBJ2	CASRMGQGASDTQYF	TGCGCCAGCAGAATGGGACAGGGGGCATCAGATACGCAGTATTTT	:::::::::0::11:14:14::24:24::45:::	CD4
114	TGCGCCAGCAGAGGAACAGGCGGACCTCAAGAGACCCAGTACTTC	TRBV5-1	TRBD1	TRBJ2-5	TRBV5	TRBJ2	CASRGTGGPQETQYF	TGCGCCAGCAGAGGAACAGGCGGACCTCAAGAGACCCAGTACTTC	:::::::::0::11:12:12::23:27::45:::	CD8
115	TGCGCCAGCAGATCAGGATTCACTGAAGCTTTCTTT	TRBV4-1		TRBJ1-1	TRBV4	TRBJ1	CASRSGFTEAFF	TGCGCCAGCAGATCAGGATTCACTGAAGCTTTCTTT	:::::::::0::11:::::20::36:::	CD8
116	TGCGCCAGCAGCAAACACCGGGGGGGCCGGGAATGAGCAGTTCTTC	TRBV23-1	TRBD2	TRBJ2-1	TRBV23	TRBJ2	CASSKHRG_AGNEQFF	TGCGCCAGCAGCAAACACCGGGGGGGCCGGGAATGAGCAGTTCTTC	:::::::::0::14:18::26:28:31::46:::	CD8
117	TGCGCCAGCAGCACATTTAATTCACCCCTCCACTTT	TRBV4-1		TRBJ1-6	TRBV4	TRBJ1	CASSTFNSPLHF	TGCGCCAGCAGCACATTTAATTCACCCCTCCACTTT	:::::::::0::12:::::17::36:::	CD8
118	TGCGCCAGCAGCACCTCCTCGACAGGGGCCTATGGCTACACCTTC	TRBV5-1	TRBD1	TRBJ1-2	TRBV5	TRBJ1	CASSTSSTGAYGYTF	TGCGCCAGCAGCACCTCCTCGACAGGGGCCTATGGCTACACCTTC	:::::::::0::12:20:::28:29::45:::	CD8
119	TGCGCCAGCAGCACGGACGTTGGGGGCGAGCAGTACTTC	TRBV5-1	TRBD1	TRBJ2-7	TRBV5	TRBJ2	CASSTDVGGEQYF	TGCGCCAGCAGCACGGACGTTGGGGGCGAGCAGTACTTC	:::::::::0::12:21:::26:26::39:::	CD4
120	TGCGCCAGCAGCACGGAGGGGTCTGGTGGGGCCAACGTCCTGACTTTC	TRBV5-1	TRBD2	TRBJ2-6	TRBV5	TRBJ2	CASSTEGSGGANVLTF	TGCGCCAGCAGCACGGAGGGGTCTGGTGGGGCCAACGTCCTGACTTTC	:::::::::0::12:14::20:20:26::48:::	CD4
121	TGCGCCAGCAGCACTAGTGGGGAGCTGTTTTTT	TRBV23-1	TRBD2	TRBJ2-2	TRBV23	TRBJ2	CASSTSGELFF	TGCGCCAGCAGCACTAGTGGGGAGCTGTTTTTT	:::::::::0::11:13:::18:18::33:::	CD4
122	TGCGCCAGCAGCCAAACAACGGCTCCAACCTACGAGCAGTACTTC	TRBV4-3		TRBJ2-7	TRBV4	TRBJ2	CASSQTTAPTYEQYF	TGCGCCAGCAGCCAAACAACGGCTCCAACCTACGAGCAGTACTTC	:::::::::0::15:::::28::45:::	CD8
123	TGCGCCAGCAGCCAAACCCTCTCCTACGAGCAGTACTTC	TRBV4-1		TRBJ2-7	TRBV4	TRBJ2	CASSQTLSYEQYF	TGCGCCAGCAGCCAAACCCTCTCCTACGAGCAGTACTTC	:::::::::0::15:::::20:20:39:::	CD8
124	TGCGCCAGCAGCCAAACCGAAGGGGGTGCTTATGGCTACACCTTC	TRBV4-3	TRBD1	TRBJ1-2	TRBV4	TRBJ1	CASSQTEGGAYGYTF	TGCGCCAGCAGCCAAACCGAAGGGGGTGCTTATGGCTACACCTTC	:::::::::0::15:20::27:29:30::45:::	CD8
125	TGCGCCAGCAGCCAAACTCCGGGACAGGGGGCCGATGAGCAGTTCTTC	TRBV4-3	TRBD1	TRBJ2-1	TRBV4	TRBJ2	CASSQTPGQGADEQFF	TGCGCCAGCAGCCAAACTCCGGGACAGGGGGCCGATGAGCAGTTCTTC	:::::::::0::15:18:20:32:32:34::48:::	CD4
126	TGCGCCAGCAGCCAACCGGGACTCTCCTACAATGAGCAGTTCTTC	TRBV4-3	TRBD2	TRBJ2-1	TRBV4	TRBJ2	CASSQPGLSYNEQFF	TGCGCCAGCAGCCAACCGGGACTCTCCTACAATGAGCAGTTCTTC	:::::::::0::15:15:17::23:23:23:45:::	CD4
127	TGCGCCAGCAGCCAACCGTCCACGGACGAGCAGTACTTC	TRBV4-1		TRBJ2-7	TRBV4	TRBJ2	CASSQPSTDEQYF	TGCGCCAGCAGCCAACCGTCCACGGACGAGCAGTACTTC	:::::::::0::15:::::25::39:::	CD8
128	TGCGCCAGCAGCCAAGAAAGAAATCTAGCGGGGGGTTATACGCAGTATTTT	TRBV4-3	TRBD2	TRBJ2-3	TRBV4	TRBJ2	CASSQERNLAGGYTQYF	TGCGCCAGCAGCCAAGAAAGAAATCTAGCGGGGGGTTATACGCAGTATTTT	:::::::::0:17:17:24::35:35:37::51:::	CD4
129	TGCGCCAGCAGCCAAGAAAGTAACACCGGGGAGCTGTTTTTT	TRBV4-3		TRBJ2-2	TRBV4	TRBJ2	CASSQESNTGELFF	TGCGCCAGCAGCCAAGAAAGTAACACCGGGGAGCTGTTTTTT	:::::::::0:17:17:::::21::42:::	CD4
130	TGCGCCAGCAGCCAAGAACGGGCCTACGAGCAGTACTTC	TRBV4-3		TRBJ2-7	TRBV4	TRBJ2	CASSQERAYEQYF	TGCGCCAGCAGCCAAGAACGGGCCTACGAGCAGTACTTC	:::::::::0:17:17:::::22::39:::	CD8
131	TGCGCCAGCAGCCAAGAACTGACCTACGAGCAGTACTTC	TRBV4-1		TRBJ2-7	TRBV4	TRBJ2	CASSQELTYEQYF	TGCGCCAGCAGCCAAGAACTGACCTACGAGCAGTACTTC	:::::::::0:17:20:::::22::39:::	CD8
132	TGCGCCAGCAGCCAAGACAGGGGAAGGGGCTACACCTTC	TRBV4-3	TRBD1	TRBJ1-2	TRBV4	TRBJ1	CASSQDRGRGYTF	TGCGCCAGCAGCCAAGACAGGGGAAGGGGCTACACCTTC	:::::::::0:17:17:17:::23:27::39:::	CD4
133	TGCGCCAGCAGCCAAGACCACAGCCTCTCTCCCCAGCATTTT	TRBV4-1		TRBJ1-5	TRBV4	TRBJ1	CASSQDHSLSPQHF	TGCGCCAGCAGCCAAGACCACAGCCTCTCTCCCCAGCATTTT	:::::::::0:17:17:::::30::42:::	CD8
134	TGCGCCAGCAGCCAAGACCCCTCCGACACCGGGGAGCTGTTTTTT	TRBV4-1	TRBD2	TRBJ2-2	TRBV4	TRBJ2	CASSQDPSDTGELFF	TGCGCCAGCAGCCAAGACCCCTCCGACACCGGGGAGCTGTTTTTT	:::::::::0:17:17:18:::24:25::45:::	CD8
135	TGCGCCAGCAGCCAAGACCTGGCGGGGGGGTGGACTGAAGCTTTCTTT	TRBV4-3	TRBD1	TRBJ1-1	TRBV4	TRBJ1	CASSQDLAGGWTEAFF	TGCGCCAGCAGCCAAGACCTGGCGGGGGGGTGGACTGAAGCTTTCTTT	:::::::::0:17:23:23:::28:33::48:::	CD4
136	TGCGCCAGCAGCCAAGACGACAGGGCCAACGTCTATGGCTACACCTTC	TRBV4-3	TRBD1	TRBJ1-2	TRBV4	TRBJ1	CASSQDDRANVYGYTF	TGCGCCAGCAGCCAAGACGACAGGGCCAACGTCTATGGCTACACCTTC	:::::::::0:17:17:18:::25:32::48:::	CD4
137	TGCGCCAGCAGCCAAGACGGGCGGACAGGGGGCGCCTATGGCTACACCTTC	TRBV4-3	TRBD1	TRBJ1-2	TRBV4	TRBJ1	CASSQDGRTGGAYGYTF	TGCGCCAGCAGCCAAGACGGGCGGACAGGGGGCGCCTATGGCTACACCTTC	:::::::::0:17:17:22::33:35:35::51:::	CD8
138	TGCGCCAGCAGCCAAGACGGGGGGCGCAGGGAGACCCAGTACTTC	TRBV4-1	TRBD1	TRBJ2-5	TRBV4	TRBJ2	CASSQDGGRRETQYF	TGCGCCAGCAGCCAAGACGGGGGGCGCAGGGAGACCCAGTACTTC	:::::::::0:17:17:19::25:27:30::45:::	CD8
139	TGCGCCAGCAGCCAAGACGTAGCTAGCTCCTACAATGAGCAGTTCTTC	TRBV4-3		TRBJ2-1	TRBV4	TRBJ2	CASSQDVASSYNEQFF	TGCGCCAGCAGCCAAGACGTAGCTAGCTCCTACAATGAGCAGTTCTTC	:::::::::0:17:17:::::24:26:48:::	CD8
140	TGCGCCAGCAGCCAAGACTATAGCATCTACCCTCGCGAGCAGTACTTC	TRBV4-3	TRBD2	TRBJ2-7	TRBV4	TRBJ2	CASSQDYSIYPREQYF	TGCGCCAGCAGCCAAGACTATAGCATCTACCCTCGCGAGCAGTACTTC	:::::::::0:17:17:29:::34:35::48:::	CD4
141	TGCGCCAGCAGCCAAGACTGGATAAATGAGCAGTTCTTC	TRBV4-1		TRBJ2-1	TRBV4	TRBJ2	CASSQDWINEQFF	TGCGCCAGCAGCCAAGACTGGATAAATGAGCAGTTCTTC	:::::::::0:17:17:::::24::39:::	CD8
142	TGCGCCAGCAGCCAAGACTGGGTCGAGGGAAACTATGGCTACACCTTC	TRBV4-3	TRBD2	TRBJ1-2	TRBV4	TRBJ1	CASSQDWVEGNYGYTF	TGCGCCAGCAGCCAAGACTGGGTCGAGGGAAACTATGGCTACACCTTC	:::::::::0:17:17:24::29:29:30::48:::	CD8
143	TGCGCCAGCAGCCAAGAGCCCGGGACGGGGATTTACAATGAGCAGTTCTTC	TRBV4-3	TRBD1	TRBJ2-1	TRBV4	TRBJ2	CASSQEPGTGIYNEQFF	TGCGCCAGCAGCCAAGAGCCCGGGACGGGGATTTACAATGAGCAGTTCTTC	:::::::::0:17:17:18:21::30:33::51:::	CD8
144	TGCGCCAGCAGCCAAGAGGCAGGGGGTTCTAACTATGGCTACACCTTC	TRBV4-1	TRBD1	TRBJ1-2	TRBV4	TRBJ1	CASSQEAGGSNYGYTF	TGCGCCAGCAGCCAAGAGGCAGGGGGTTCTAACTATGGCTACACCTTC	:::::::::0:17:17:19:::26:28:28:48:::	CD8
145	TGCGCCAGCAGCCAAGAGGGAACAGGCAACTATGGCTACACCTTC	TRBV4-3	TRBD1	TRBJ1-2	TRBV4	TRBJ1	CASSQEGTGNYGYTF	TGCGCCAGCAGCCAAGAGGGAACAGGCAACTATGGCTACACCTTC	:::::::::0:17:17:17:17::26:27::45:::	CD8
146	TGCGCCAGCAGCCAAGAGGTGACGGTAACTTCCTATGGCTACACCTTC	TRBV4-3		TRBJ1-2	TRBV4	TRBJ1	CASSQEVTVTSYGYTF	TGCGCCAGCAGCCAAGAGGTGACGGTAACTTCCTATGGCTACACCTTC	:::::::::0:17:17:::::32::48:::	CD8
147	TGCGCCAGCAGCCAAGAGGTGCAGGGGAACACCGGGGAGCTGTTTTTT	TRBV4-3	TRBD1	TRBJ2-2	TRBV4	TRBJ2	CASSQEVQGNTGELFF	TGCGCCAGCAGCCAAGAGGTGCAGGGGAACACCGGGGAGCTGTTTTTT	:::::::::0:17:17:21:::26:26::48:::	CD4
148	TGCGCCAGCAGCCAAGAGTCAAGCACGGTCTACGAGCAGTACTTC	TRBV4-3		TRBJ2-7	TRBV4	TRBJ2	CASSQESSTVYEQYF	TGCGCCAGCAGCCAAGAGTCAAGCACGGTCTACGAGCAGTACTTC	:::::::::0:17:17:::::29::45:::	CD8
149	TGCGCCAGCAGCCAAGAGTCCCCGAGCTCCGGGGAGCTGTTTTTT	TRBV4-3	TRBD1	TRBJ2-2	TRBV4	TRBJ2	CASSQESPSSGELFF	TGCGCCAGCAGCCAAGAGTCCCCGAGCTCCGGGGAGCTGTTTTTT	:::::::::0:17:17:17:22::22:22:22:45:::	CD8
150	TGCGCCAGCAGCCAAGAGTCGCTGGGTAACTATGGCTACACCTTC	TRBV4-3		TRBJ1-2	TRBV4	TRBJ1	CASSQESLGNYGYTF	TGCGCCAGCAGCCAAGAGTCGCTGGGTAACTATGGCTACACCTTC	:::::::::0:17:17:::::26::45:::	CD8
151	TGCGCCAGCAGCCAAGATAACAACCCGGGCTATGGCTACACCTTC	TRBV4-3	TRBD1	TRBJ1-2	TRBV4	TRBJ1	CASSQDNNPGYGYTF	TGCGCCAGCAGCCAAGATAACAACCCGGGCTATGGCTACACCTTC	:::::::::0:17:18:23:26::29:29::45:::	CD8
152	TGCGCCAGCAGCCAAGATACCCCTCAGCCCCAGCATTTT	TRBV4-1		TRBJ1-5	TRBV4	TRBJ1	CASSQDTPQPQHF	TGCGCCAGCAGCCAAGATACCCCTCAGCCCCAGCATTTT	:::::::::0:17:18:::::23::39:::	CD8
153	TGCGCCAGCAGCCAAGATACCCGGGAACCCCAGCATTTT	TRBV4-3	TRBD1	TRBJ1-5	TRBV4	TRBJ1	CASSQDTREPQHF	TGCGCCAGCAGCCAAGATACCCGGGAACCCCAGCATTTT	:::::::::0:17:18:19:22::26:27::39:::	CD4
154	TGCGCCAGCAGCCAAGATATCATAGTCAACATTCAGTACTTC	TRBV4-3	TRBD2	TRBJ2-4	TRBV4	TRBJ2	CASSQDIIVNIQYF	TGCGCCAGCAGCCAAGATATCATAGTCAACATTCAGTACTTC	:::::::::0:17:18:22:::27:27::42:::	CD4
155	TGCGCCAGCAGCCAAGATCAAGGCGGACAGGGGGCCTATGGCTACACCTTC	TRBV4-3	TRBD1	TRBJ1-2	TRBV4	TRBJ1	CASSQDQGGQGAYGYTF	TGCGCCAGCAGCCAAGATCAAGGCGGACAGGGGGCCTATGGCTACACCTTC	:::::::::0:17:19:24::35:35:35::51:::	CD8
156	TGCGCCAGCAGCCAAGATCAGCCCACCAAGCAGTTCTTC	TRBV4-1		TRBJ2-1	TRBV4	TRBJ2	CASSQDQPTKQFF	TGCGCCAGCAGCCAAGATCAGCCCACCAAGCAGTTCTTC	:::::::::0:17:19:::::28::39:::	CD8
157	TGCGCCAGCAGCCAAGATCCCCGTACAGGGTTAGGCGATAATGAGCAGTTCTTC	TRBV4-3	TRBD1	TRBJ2-1	TRBV4	TRBJ2	CASSQDPRTGLGDNEQFF	TGCGCCAGCAGCCAAGATCCCCGTACAGGGTTAGGCGATAATGAGCAGTTCTTC	:::::::::0:17:19:24:::30:39::54:::	CD8
158	TGCGCCAGCAGCCAAGATCGGCGGGACCCCTACGAGCAGTACTTC	TRBV4-3	TRBD1	TRBJ2-7	TRBV4	TRBJ2	CASSQDRRDPYEQYF	TGCGCCAGCAGCCAAGATCGGCGGGACCCCTACGAGCAGTACTTC	:::::::::0:17:19:21:22::27:28::45:::	CD8
159	TGCGCCAGCAGCCAAGATCGGGCAGCCTCTGGAAACACCATATATTTT	TRBV4-3		TRBJ1-3	TRBV4	TRBJ1	CASSQDRAASGNTIYF	TGCGCCAGCAGCCAAGATCGGGCAGCCTCTGGAAACACCATATATTTT	:::::::::0:17:19:::::26:26:48:::	CD4
160	TGCGCCAGCAGCCAAGATCTTACAGGGGGCGCGTACGAGCAGTACTTC	TRBV4-3	TRBD1	TRBJ2-7	TRBV4	TRBJ2	CASSQDLTGGAYEQYF	TGCGCCAGCAGCCAAGATCTTACAGGGGGCGCGTACGAGCAGTACTTC	:::::::::0:17:21:21::30:32:33::48:::	CD8
161	TGCGCCAGCAGCCAAGATGAGCGGTGGTCGGGCTACACCTTC	TRBV4-3	TRBD2	TRBJ1-2	TRBV4	TRBJ1	CASSQDERWSGYTF	TGCGCCAGCAGCCAAGATGAGCGGTGGTCGGGCTACACCTTC	:::::::::0:17:18:19:::24:30::42:::	CD8
162	TGCGCCAGCAGCCAAGATGTGGGGCAGCCCCAGCATTTT	TRBV4-3		TRBJ1-5	TRBV4	TRBJ1	CASSQDVGQPQHF	TGCGCCAGCAGCCAAGATGTGGGGCAGCCCCAGCATTTT	:::::::::0:17:18:::::24::39:::	CD4
163	TGCGCCAGCAGCCAAGATTCCGGGACAGGGGCTTACGAGCAGTACTTC	TRBV4-1	TRBD1	TRBJ2-7	TRBV4	TRBJ2	CASSQDSGTGAYEQYF	TGCGCCAGCAGCCAAGATTCCGGGACAGGGGCTTACGAGCAGTACTTC	:::::::::0:17:18:19:21::31:33::48:::	CD8
164	TGCGCCAGCAGCCAAGATTGGGGACAGGGTGACGCTGAAGCTTTCTTT	TRBV4-3	TRBD1	TRBJ1-1	TRBV4	TRBJ1	CASSQDWGQGDAEAFF	TGCGCCAGCAGCCAAGATTGGGGACAGGGTGACGCTGAAGCTTTCTTT	:::::::::0:17:18:20:20::29:31::48:::	CD8
165	TGCGCCAGCAGCCAAGATTGGTCAGGGGGCCCCTACGAGCAGTACTTC	TRBV4-3		TRBJ2-7	TRBV4	TRBJ2	CASSQDWSGGPYEQYF	TGCGCCAGCAGCCAAGATTGGTCAGGGGGCCCCTACGAGCAGTACTTC	:::::::::0:17:18:::::25:29:48:::	CD4
166	TGCGCCAGCAGCCAAGCAACCGGGACAGCTTATGGCTACACCTTC	TRBV4-3	TRBD1	TRBJ1-2	TRBV4	TRBJ1	CASSQATGTAYGYTF	TGCGCCAGCAGCCAAGCAACCGGGACAGCTTATGGCTACACCTTC	:::::::::0::16:19:21::28:30::45:::	CD8
167	TGCGCCAGCAGCCAAGCCCTTTTACGGGTGAACACTGAAGCTTTCTTT	TRBV4-3		TRBJ1-1	TRBV4	TRBJ1	CASSQALLRVNTEAFF	TGCGCCAGCAGCCAAGCCCTTTTACGGGTGAACACTGAAGCTTTCTTT	:::::::::0::16:::::28:28:48:::	CD4
168	TGCGCCAGCAGCCAAGCGACAGCCTACGAGCAGTACGTC	TRBV4-1	TRBD1	TRBJ2-7	TRBV4	TRBJ2	CASSQATAYEQYV	TGCGCCAGCAGCCAAGCGACAGCCTACGAGCAGTACGTC	:::::::::0::16:17:::22:22::39:::	CD8
169	TGCGCCAGCAGCCAAGCGGACAGGGTTATGAACACTGAAGCTTTCTTT	TRBV4-1		TRBJ1-1	TRBV4	TRBJ1	CASSQADRVMNTEAFF	TGCGCCAGCAGCCAAGCGGACAGGGTTATGAACACTGAAGCTTTCTTT	:::::::::0::16:::::20:28:48:::	CD4
170	TGCGCCAGCAGCCAAGCTTCGCTGGCGGGTAACACCGGGGAGCTGTTTTTT	TRBV4-3	TRBD2	TRBJ2-2	TRBV4	TRBJ2	CASSQASLAGNTGELFF	TGCGCCAGCAGCCAAGCTTCGCTGGCGGGTAACACCGGGGAGCTGTTTTTT	:::::::::0:16:24:24:::29:30::51:::	CD8
171	TGCGCCAGCAGCCAAGGAGGCTATGGCTACACCTTC	TRBV4-3		TRBJ1-2	TRBV4	TRBJ1	CASSQGGYGYTF	TGCGCCAGCAGCCAAGGAGGCTATGGCTACACCTTC	:::::::::0::16:::::20::36:::	CD8
172	TGCGCCAGCAGCCAAGGATCCGCAGGGAACCAGCCCCAGCATTTT	TRBV4-3	TRBD1	TRBJ1-5	TRBV4	TRBJ1	CASSQGSAGNQPQHF	TGCGCCAGCAGCCAAGGATCCGCAGGGAACCAGCCCCAGCATTTT	:::::::::0:18:20:22:::27:27::45:::	CD8
173	TGCGCCAGCAGCCAAGGCGAAACGGCAACCACCGGGGAGCTGTTTTTT	TRBV4-3		TRBJ2-2	TRBV4	TRBJ2	CASSQGETATTGELFF	TGCGCCAGCAGCCAAGGCGAAACGGCAACCACCGGGGAGCTGTTTTTT	:::::::::0::16:::::29::48:::	CD8
174	TGCGCCAGCAGCCAAGGCGGGACAGCGGCATATGGCTACACCTTC	TRBV4-3	TRBD2	TRBJ1-2	TRBV4	TRBJ1	CASSQGGTAAYGYTF	TGCGCCAGCAGCCAAGGCGGGACAGCGGCATATGGCTACACCTTC	:::::::::0::16:17:18::28:30::45:::	CD8
175	TGCGCCAGCAGCCAAGGGGAAGCGGGGGGGCTTTACAATGAGCAGTTCTTC	TRBV4-1	TRBD2	TRBJ2-1	TRBV4	TRBJ2	CASSQGEAGGLYNEQFF	TGCGCCAGCAGCCAAGGGGAAGCGGGGGGGCTTTACAATGAGCAGTTCTTC	:::::::::0::16:20::30:31:33::51:::	CD8
176	TGCGCCAGCAGCCAAGGGGGACCGGGACAGGGTCCAGATACGCAGTATTTT	TRBV4-3	TRBD1	TRBJ2-3	TRBV4	TRBJ2	CASSQGGPGQGPDTQYF	TGCGCCAGCAGCCAAGGGGGACCGGGACAGGGTCCAGATACGCAGTATTTT	:::::::::0::16:21:23::32:34::51:::	CD4
177	TGCGCCAGCAGCCAAGGGGGTATGATGAGTCAGCCCCAGCATTTT	TRBV4-1		TRBJ1-5	TRBV4	TRBJ1	CASSQGGMMSQPQHF	TGCGCCAGCAGCCAAGGGGGTATGATGAGTCAGCCCCAGCATTTT	:::::::::0::16:::::29::45:::	CD8
178	TGCGCCAGCAGCCAAGGGTCAGGGGTCGGTAATTCACCCCTCCACTTT	TRBV4-1	TRBD1	TRBJ1-6	TRBV4	TRBJ1	CASSQGSGVGNSPLHF	TGCGCCAGCAGCCAAGGGTCAGGGGTCGGTAATTCACCCCTCCACTTT	:::::::::0::16:16::27:28:29::48:::	CD8
179	TGCGCCAGCAGCCAAGGGTCGGACAGGGGGCAGGACGAGCAGTACTTC	TRBV4-3	TRBD1	TRBJ2-7	TRBV4	TRBJ2	CASSQGSDRGQDEQYF	TGCGCCAGCAGCCAAGGGTCGGACAGGGGGCAGGACGAGCAGTACTTC	:::::::::0::16:20::31:31:34::48:::	CD8
180	TGCGCCAGCAGCCAAGGTTATGCGAATAGCATCCATGAGCAGTTCTTC	TRBV4-1		TRBJ2-1	TRBV4	TRBJ2	CASSQGYANSIHEQFF	TGCGCCAGCAGCCAAGGTTATGCGAATAGCATCCATGAGCAGTTCTTC	:::::::::0::16:::::34::48:::	CD4
181	TGCGCCAGCAGCCAAGTAACAGGGGGAAGCTATGGCTACACCTTC	TRBV4-3	TRBD1	TRBJ1-2	TRBV4	TRBJ1	CASSQVTGGSYGYTF	TGCGCCAGCAGCCAAGTAACAGGGGGAAGCTATGGCTACACCTTC	:::::::::0::16:18:::26:29::45:::	CD8
182	TGCGCCAGCAGCCAAGTAACGGAGACAGGGCCGTATGGCTACACCTTC	TRBV4-3	TRBD1	TRBJ1-2	TRBV4	TRBJ1	CASSQVTETGPYGYTF	TGCGCCAGCAGCCAAGTAACGGAGACAGGGCCGTATGGCTACACCTTC	:::::::::0::16:19:20::30:33::48:::	CD8
183	TGCGCCAGCAGCCAAGTAAGCACTGAAGCTTTCTTT	TRBV4-1		TRBJ1-1	TRBV4	TRBJ1	CASSQVSTEAFF	TGCGCCAGCAGCCAAGTAAGCACTGAAGCTTTCTTT	:::::::::0::16:::::20::36:::	CD8
184	TGCGCCAGCAGCCAAGTCCTCTGGTACAATGAGCAGTTCTTC	TRBV4-3		TRBJ2-1	TRBV4	TRBJ2	CASSQVLWYNEQFF	TGCGCCAGCAGCCAAGTCCTCTGGTACAATGAGCAGTTCTTC	:::::::::0::16:::::24::42:::	CD4
185	TGCGCCAGCAGCCAAGTGGAAAGTGCGCGAGGAAACATTCAGTACTTC	TRBV4-1	TRBD2	TRBJ2-4	TRBV4	TRBJ2	CASSQVESARGNIQYF	TGCGCCAGCAGCCAAGTGGAAAGTGCGCGAGGAAACATTCAGTACTTC	:::::::::0::16:24:::32:32::48:::	CD8
186	TGCGCCAGCAGCCAAGTTTTCACCAACTCCTACAATGAGCAGTTCTTC	TRBV4-1		TRBJ2-1	TRBV4	TRBJ2	CASSQVFTNSYNEQFF	TGCGCCAGCAGCCAAGTTTTCACCAACTCCTACAATGAGCAGTTCTTC	:::::::::0::16:::::26:26:48:::	CD8
187	TGCGCCAGCAGCCACGGGACAGGGGGCAATCAGCCCCAGCATTTT	TRBV4-3	TRBD1	TRBJ1-5	TRBV4	TRBJ1	CASSHGTGGNQPQHF	TGCGCCAGCAGCCACGGGACAGGGGGCAATCAGCCCCAGCATTTT	:::::::::0::14:14:15::25:25::45:::	CD8
188	TGCGCCAGCAGCCACGGGACGGCCTATGGCTACACCTTC	TRBV5-1	TRBD2	TRBJ1-2	TRBV5	TRBJ1	CASSHGTAYGYTF	TGCGCCAGCAGCCACGGGACGGCCTATGGCTACACCTTC	:::::::::0::12:14::22:23:23::39:::	CD8
189	TGCGCCAGCAGCCAGACGTGGGCAGGGGCCTTACCCTACGAGCAGTACTTC	TRBV4-1	TRBD1	TRBJ2-7	TRBV4	TRBJ2	CASSQTWAGALPYEQYF	TGCGCCAGCAGCCAGACGTGGGCAGGGGCCTTACCCTACGAGCAGTACTTC	:::::::::0::14:19:19::28:34::51:::	CD8
190	TGCGCCAGCAGCCAGCTAGCTACGAGCTCCTACGAGCAGTACTTC	TRBV4-3	TRBD2	TRBJ2-7	TRBV4	TRBJ2	CASSQLATSSYEQYF	TGCGCCAGCAGCCAGCTAGCTACGAGCTCCTACGAGCAGTACTTC	:::::::::0::14:14:::19:20:26:45:::	CD8
191	TGCGCCAGCAGCCAGCTTTCTAGCGGGGGACCACCGAGGAGGGATACGCAGTATTTT	TRBV4-1	TRBD2	TRBJ2-3	TRBV4	TRBJ2	CASSQLSSGGPPRRDTQYF	TGCGCCAGCAGCCAGCTTTCTAGCGGGGGACCACCGAGGAGGGATACGCAGTATTTT	:::::::::0::14:19:::27:42::57:::	CD8
192	TGCGCCAGCAGCCAGGGACCCGGGACAGGAGCCTACGAGCAGTACTTC	TRBV4-3	TRBD1	TRBJ2-7	TRBV4	TRBJ2	CASSQGPGTGAYEQYF	TGCGCCAGCAGCCAGGGACCCGGGACAGGAGCCTACGAGCAGTACTTC	:::::::::0::14:18:21::26:26:31:48:::	CD8
193	TGCGCCAGCAGCCAGGGCGGGGCGGGGGGCTCCTACGAGCAGTACTTC	TRBV4-3	TRBD1	TRBJ2-7	TRBV4	TRBJ2	CASSQGGAGGSYEQYF	TGCGCCAGCAGCCAGGGCGGGGCGGGGGGCTCCTACGAGCAGTACTTC	:::::::::0::14:18::23:24:25:29:48:::	CD8
194	TGCGCCAGCAGCCAGTTTGTGAGCTCCTACGAGCAGTACTTC	TRBV4-3		TRBJ2-7	TRBV4	TRBJ2	CASSQFVSSYEQYF	TGCGCCAGCAGCCAGTTTGTGAGCTCCTACGAGCAGTACTTC	:::::::::0::14:::::20:23:42:::	CD8
195	TGCGCCAGCAGCCATGCCGGGCAGGCGACTTTCTTT	TRBV4-1	TRBD1	TRBJ1-1	TRBV4	TRBJ1	CASSHAGQATFF	TGCGCCAGCAGCCATGCCGGGCAGGCGACTTTCTTT	:::::::::0::14:16:18::25:28::36:::	CD8
196	TGCGCCAGCAGCCATGGGGGTGGAAACACCATATATTTT	TRBV4-1	TRBD1	TRBJ1-3	TRBV4	TRBJ1	CASSHGGGNTIYF	TGCGCCAGCAGCCATGGGGGTGGAAACACCATATATTTT	:::::::::0::14:15:::20:20::39:::	CD8
197	TGCGCCAGCAGCCCAGCGGGGGACTCCTACGAGCAGTACTTC	TRBV4-3		TRBJ2-7	TRBV4	TRBJ2	CASSPAGDSYEQYF	TGCGCCAGCAGCCCAGCGGGGGACTCCTACGAGCAGTACTTC	:::::::::0::16:::::20:23:42:::	CD8
198	TGCGCCAGCAGCCCAGGACAGGGGTCCTACGAGCAGTACTTC	TRBV4-3	TRBD1	TRBJ2-7	TRBV4	TRBJ2	CASSPGQGSYEQYF	TGCGCCAGCAGCCCAGGACAGGGGTCCTACGAGCAGTACTTC	:::::::::0::16:16:::24:24::42:::	CD8
199	TGCGCCAGCAGCCCAGTGGCGGGGAGCTCCTACGAGCAGTACTTC	TRBV4-3		TRBJ2-7	TRBV4	TRBJ2	CASSPVAGSSYEQYF	TGCGCCAGCAGCCCAGTGGCGGGGAGCTCCTACGAGCAGTACTTC	:::::::::0::16:::::22:26:45:::	CD8
200	TGCGCCAGCAGCCCCGACAGTGGACTCACAGATACGCAGTATTTT	TRBV5-1	TRBD1	TRBJ2-3	TRBV5	TRBJ2	CASSPDSGLTDTQYF	TGCGCCAGCAGCCCCGACAGTGGACTCACAGATACGCAGTATTTT	:::::::::0::12:15:::23:26::45:::	CD4
201	TGCGCCAGCAGCCCCGCGGAGGCCTACGAGCAGTACTTC	TRBV5-1	TRBD2	TRBJ2-7	TRBV5	TRBJ2	CASSPAEAYEQYF	TGCGCCAGCAGCCCCGCGGAGGCCTACGAGCAGTACTTC	:::::::::0::12:12:::17:22::39:::	CD8
202	TGCGCCAGCAGCCCCGGGACAGGAGCGGGCTATGGCTACACCTTC	TRBV5-1	TRBD1	TRBJ1-2	TRBV5	TRBJ1	CASSPGTGAGYGYTF	TGCGCCAGCAGCCCCGGGACAGGAGCGGGCTATGGCTACACCTTC	:::::::::0::12:12:15::23:29::45:::	CD8
203	TGCGCCAGCAGCCCCTACTCAGGGGGAGGTGAGCAGTTCTTC	TRBV4-3	TRBD1	TRBJ2-1	TRBV4	TRBJ2	CASSPYSGGGEQFF	TGCGCCAGCAGCCCCTACTCAGGGGGAGGTGAGCAGTTCTTC	:::::::::0::13:19:::26:29::42:::	CD8
204	TGCGCCAGCAGCCCCTCACAGGCCTACGAGCAGTACTTC	TRBV4-3	TRBD1	TRBJ2-7	TRBV4	TRBJ2	CASSPSQAYEQYF	TGCGCCAGCAGCCCCTCACAGGCCTACGAGCAGTACTTC	:::::::::0::13:17:::22:22::39:::	CD8
205	TGCGCCAGCAGCCCCTCCCGAACGGGGGCCTACGAGCAGTACTTC	TRBV4-3	TRBD2	TRBJ2-7	TRBV4	TRBJ2	CASSPSRTGAYEQYF	TGCGCCAGCAGCCCCTCCCGAACGGGGGCCTACGAGCAGTACTTC	:::::::::0::13:13:::20:28::45:::	CD8
206	TGCGCCAGCAGCCCCTCTCCAGGGGAGGCCTATGGCTACACCTTC	TRBV4-3	TRBD1	TRBJ1-2	TRBV4	TRBJ1	CASSPSPGEAYGYTF	TGCGCCAGCAGCCCCTCTCCAGGGGAGGCCTATGGCTACACCTTC	:::::::::0::13:19:::25:29::45:::	CD8
207	TGCGCCAGCAGCCCCTTACAGGGAAGCTCCTACGAGCAGTACTTC	TRBV5-1	TRBD1	TRBJ2-7	TRBV5	TRBJ2	CASSPLQGSSYEQYF	TGCGCCAGCAGCCCCTTACAGGGAAGCTCCTACGAGCAGTACTTC	:::::::::0::12:17:::23:24:26:45:::	CD4
208	TGCGCCAGCAGCCCGACAGGGCAAAACGCTGAAGCTTTCTTT	TRBV5-1	TRBD1	TRBJ1-1	TRBV5	TRBJ1	CASSPTGQNAEAFF	TGCGCCAGCAGCCCGACAGGGCAAAACGCTGAAGCTTTCTTT	:::::::::0::12:14:::21:24::42:::	CD4
209	TGCGCCAGCAGCCCGACGGAGATTAGGGCCTTC	TRBV5-1		TRBJ1-2	TRBV5	TRBJ1	CASSPTEIRAF	TGCGCCAGCAGCCCGACGGAGATTAGGGCCTTC	:::::::::0::12:::::28::33:::	CD8
210	TGCGCCAGCAGCCCGGAGGCAGATTCAACTAATGAAAAACTGTTTTTT	TRBV5-1	TRBD2	TRBJ1-4	TRBV5	TRBJ1	CASSPEADSTNEKLFF	TGCGCCAGCAGCCCGGAGGCAGATTCAACTAATGAAAAACTGTTTTTT	:::::::::0::12:14:::19:25:25:48:::	CD4
211	TGCGCCAGCAGCCCGGGACAGACCCTAACTATACAAGAGACCCAGTACTTC	TRBV5-1	TRBD1	TRBJ2-5	TRBV5	TRBJ2	CASSPGQTLTIQETQYF	TGCGCCAGCAGCCCGGGACAGACCCTAACTATACAAGAGACCCAGTACTTC	:::::::::0::12:12:14::21:33::51:::	CD4
212	TGCGCCAGCAGCCCGTCTATGGCAGCGAGCTACGAGCAGTACTTC	TRBV4-3		TRBJ2-7	TRBV4	TRBJ2	CASSPSMAASYEQYF	TGCGCCAGCAGCCCGTCTATGGCAGCGAGCTACGAGCAGTACTTC	:::::::::0::13:::::29::45:::	CD8
213	TGCGCCAGCAGCCCTAGCGGGGGGACCGCCTACGAGCAGTACTTC	TRBV4-3	TRBD2	TRBJ2-7	TRBV4	TRBJ2	CASSPSGGTAYEQYF	TGCGCCAGCAGCCCTAGCGGGGGGACCGCCTACGAGCAGTACTTC	:::::::::0::13:13:::21:22:26:45:::	CD8
214	TGCGCCAGCAGCCCTGCGGCTAGCCTCCTTAACACCGGGGAGCTGTTTTTT	TRBV5-1	TRBD2	TRBJ2-2	TRBV5	TRBJ2	CASSPAASLLNTGELFF	TGCGCCAGCAGCCCTGCGGCTAGCCTCCTTAACACCGGGGAGCTGTTTTTT	:::::::::0::12:12:::23:30::51:::	CD4
215	TGCGCCAGCAGCCGACAAGTTGGGATATCGAGCACGCCAGATACGCAGTATTTT	TRBV4-3		TRBJ2-3	TRBV4	TRBJ2	CASSRQVGISSTPDTQYF	TGCGCCAGCAGCCGACAAGTTGGGATATCGAGCACGCCAGATACGCAGTATTTT	:::::::::0::13:::::37::54:::	CD4
216	TGCGCCAGCAGCCGATCGCCCCCGGAACAGGGGGTTGGTCAGCCCCAGCATTTT	TRBV4-1	TRBD1	TRBJ1-5	TRBV4	TRBJ1	CASSRSPPEQGVGQPQHF	TGCGCCAGCAGCCGATCGCCCCCGGAACAGGGGGTTGGTCAGCCCCAGCATTTT	:::::::::0::13:20:23::34:38::54:::	CD4
217	TGCGCCAGCAGCCGATCGGGACAGCCTTACTACAATGAGCAGTTCTTC	TRBV4-1	TRBD1	TRBJ2-1	TRBV4	TRBJ2	CASSRSGQPYYNEQFF	TGCGCCAGCAGCCGATCGGGACAGCCTTACTACAATGAGCAGTTCTTC	:::::::::0::13:16:17::24:29::48:::	CD8
218	TGCGCCAGCAGCCGCGGGGACCCAGCCTACGAGCAGTACTTC	TRBV4-3	TRBD1	TRBJ2-7	TRBV4	TRBJ2	CASSRGDPAYEQYF	TGCGCCAGCAGCCGCGGGGACCCAGCCTACGAGCAGTACTTC	:::::::::0::13:16:16::21:25::42:::	CD8
219	TGCGCCAGCAGCCGGAACCCTCGGGACATCTCTGGGGCCAACGTCCTGACTTTC	TRBV5-1	TRBD1	TRBJ2-6	TRBV5	TRBJ2	CASSRNPRDISGANVLTF	TGCGCCAGCAGCCGGAACCCTCGGGACATCTCTGGGGCCAACGTCCTGACTTTC	:::::::::0::12:21:22::28:29:29:54:::	CD4
220	TGCGCCAGCAGCCGGCGGACTAGCGGGGGGGATACAGATACGCAGTATTTT	TRBV5-1	TRBD2	TRBJ2-3	TRBV5	TRBJ2	CASSRRTSGGDTDTQYF	TGCGCCAGCAGCCGGCGGACTAGCGGGGGGGATACAGATACGCAGTATTTT	:::::::::0::12:16::31:31:33::51:::	CD4
221	TGCGCCAGCAGCCGGGGACAGCCGAACACTGAAGCTTTCTTT	TRBV5-1	TRBD1	TRBJ1-1	TRBV5	TRBJ1	CASSRGQPNTEAFF	TGCGCCAGCAGCCGGGGACAGCCGAACACTGAAGCTTTCTTT	:::::::::0::12:14:14::21:23::42:::	CD4
222	TGCGCCAGCAGCCGGGGAGAGGGTCGGGACAATAGGTCACCCCTCCACTTT	TRBV4-3	TRBD1	TRBJ1-6	TRBV4	TRBJ1	CASSRGEGRDNRSPLHF	TGCGCCAGCAGCCGGGGAGAGGGTCGGGACAATAGGTCACCCCTCCACTTT	:::::::::0::13:24:25::31:36::51:::	CD8
223	TGCGCCAGCAGCCGGGGGGGGGGCTACAATGAGCAGTTCTTC	TRBV4-3	TRBD1	TRBJ2-1	TRBV4	TRBJ2	CASSRGGGYNEQFF	TGCGCCAGCAGCCGGGGGGGGGGCTACAATGAGCAGTTCTTC	:::::::::0::13:13:::18:23::42:::	CD8
224	TGCGCCAGCAGCCTAGGGACAGGGGATGAGCAGTTCTTC	TRBV5-1	TRBD1	TRBJ2-1	TRBV5	TRBJ2	CASSLGTGDEQFF	TGCGCCAGCAGCCTAGGGACAGGGGATGAGCAGTTCTTC	:::::::::0::12:15:15::25:25::39:::	CD8
225	TGCGCCAGCAGCCTCCTCGAAAACTCTGGAAACACCATATATTTT	TRBV5-1		TRBJ1-3	TRBV5	TRBJ1	CASSLLENSGNTIYF	TGCGCCAGCAGCCTCCTCGAAAACTCTGGAAACACCATATATTTT	:::::::::0::12:::::23:23:45:::	CD4
226	TGCGCCAGCAGCCTGAGATATAGCACAGATACGCAGTATTTT	TRBV5-1		TRBJ2-3	TRBV5	TRBJ2	CASSLRYSTDTQYF	TGCGCCAGCAGCCTGAGATATAGCACAGATACGCAGTATTTT	:::::::::0::15:::::20:21:42:::	CD8
227	TGCGCCAGCAGCCTGGCCGAGCGGGCCGGGGAGCTGTTTTTT	TRBV4-3	TRBD2	TRBJ2-2	TRBV4	TRBJ2	CASSLAERAGELFF	TGCGCCAGCAGCCTGGCCGAGCGGGCCGGGGAGCTGTTTTTT	:::::::::0::13:19:::25:25::42:::	CD4
228	TGCGCCAGCAGCCTGGGCGGAGCGCGCACAGATACGCAGTATTTT	TRBV4-3	TRBD1	TRBJ2-3	TRBV4	TRBJ2	CASSLGGARTDTQYF	TGCGCCAGCAGCCTGGGCGGAGCGCGCACAGATACGCAGTATTTT	:::::::::0::13:14::18:19:25::45:::	CD4
229	TGCGCCAGCAGCGAGCAGGTCGGGGGGCGATACAATGAGCAGTTCTTC	TRBV5-1	TRBD1	TRBJ2-1	TRBV5	TRBJ2	CASSEQVGGRYNEQFF	TGCGCCAGCAGCGAGCAGGTCGGGGGGCGATACAATGAGCAGTTCTTC	:::::::::0::12:22::28:29:30::48:::	CD4
230	TGCGCCAGCAGCGATGGACAGGGAACAGATACGCAGTATTTT	TRBV10-1	TRBD1	TRBJ2-3	TRBV10	TRBJ2	CASSDGQGTDTQYF	TGCGCCAGCAGCGATGGACAGGGAACAGATACGCAGTATTTT	:::::::::0::14:15:::23:24::42:::	CD4
231	TGCGCCAGCAGCGCCCGAGGAGGCGGGAACACAGATACGCAGTATTTT	TRBV5-1	TRBD2	TRBJ2-3	TRBV5	TRBJ2	CASSARGGGNTDTQYF	TGCGCCAGCAGCGCCCGAGGAGGCGGGAACACAGATACGCAGTATTTT	:::::::::0::12:22:::28:29::48:::	CD4
232	TGCGCCAGCAGCGGAGGGGGCGAGCAGTACTTC	TRBV5-1	TRBD1	TRBJ2-7	TRBV5	TRBJ2	CASSGGGEQYF	TGCGCCAGCAGCGGAGGGGGCGAGCAGTACTTC	:::::::::0::12:14:::20:20::33:::	CD8
233	TGCGCCAGCAGCGGGCCCGACTCTGGAAACACCATATATTTT	TRBV5-1	TRBD2	TRBJ1-3	TRBV5	TRBJ1	CASSGPDSGNTIYF	TGCGCCAGCAGCGGGCCCGACTCTGGAAACACCATATATTTT	:::::::::0::12:12::15:18:20:20:42:::	CD4
234	TGCGCCAGCAGCGGGGCGGGGGGGTACGAGCAGTACTTC	TRBV5-1	TRBD2	TRBJ2-7	TRBV5	TRBJ2	CASSGAGGYEQYF	TGCGCCAGCAGCGGGGCGGGGGGGTACGAGCAGTACTTC	:::::::::0::12:15::24:24:24::39:::	CD8
235	TGCGCCAGCAGCGTAGTAGGGGGTTTTGAGCAGTTCTTC	TRBV5-1	TRBD1	TRBJ2-1	TRBV5	TRBJ2	CASSVVGGFEQFF	TGCGCCAGCAGCGTAGTAGGGGGTTTTGAGCAGTTCTTC	:::::::::0::12:17:::23:26::39:::	CD4
236	TGCGCCAGCAGCTACCAAAGGACAGGCGGTGAAGCTTTCTTT	TRBV5-1	TRBD1	TRBJ1-1	TRBV5	TRBJ1	CASSYQRTGGEAFF	TGCGCCAGCAGCTACCAAAGGACAGGCGGTGAAGCTTTCTTT	:::::::::0::13:19:::29:29::42:::	CD4
237	TGCGCCAGCAGCTCAACTTACACCGGGGAGCTGTTTTTT	TRBV5-1		TRBJ2-2	TRBV5	TRBJ2	CASSSTYTGELFF	TGCGCCAGCAGCTCAACTTACACCGGGGAGCTGTTTTTT	:::::::::0::13:::::19::39:::	CD4
238	TGCGCCAGCAGCTCACAGACAGGCTCAAAAAACATTCAGTACTTC	TRBV4-3		TRBJ2-4	TRBV4	TRBJ2	CASSSQTGSKNIQYF	TGCGCCAGCAGCTCACAGACAGGCTCAAAAAACATTCAGTACTTC	:::::::::0:19:19:::::27::45:::	CD4
239	TGCGCCAGCAGCTCCCCTAGCGGGGGTAATGAGCAGTTCTTC	TRBV5-1	TRBD2	TRBJ2-1	TRBV5	TRBJ2	CASSSPSGGNEQFF	TGCGCCAGCAGCTCCCCTAGCGGGGGTAATGAGCAGTTCTTC	:::::::::0::13:16:::24:27::42:::	CD4
240	TGCGCCAGCAGCTCCCGGATATCGACGCCGCCAGATACGCAGTATTTT	TRBV5-1	TRBD1	TRBJ2-3	TRBV5	TRBJ2	CASSSRISTPPDTQYF	TGCGCCAGCAGCTCCCGGATATCGACGCCGCCAGATACGCAGTATTTT	:::::::::0::13:13:16::18:31::48:::	CD4
241	TGCGCCAGCAGCTCCGCGGAGGCCTACGAGCAGTACTTC	TRBV5-1	TRBD2	TRBJ2-7	TRBV5	TRBJ2	CASSSAEAYEQYF	TGCGCCAGCAGCTCCGCGGAGGCCTACGAGCAGTACTTC	:::::::::0::13:17:::22:22::39:::	CD8
242	TGCGCCAGCAGCTCGCAATTTTCAGTCGGGACAGGGCAAAACATTCAGTACTTC	TRBV4-3	TRBD1	TRBJ2-4	TRBV4	TRBJ2	CASSSQFSVGTGQNIQYF	TGCGCCAGCAGCTCGCAATTTTCAGTCGGGACAGGGCAAAACATTCAGTACTTC	:::::::::0::12:26:27::36:37::54:::	CD4
243	TGCGCCAGCAGCTCGCCGGACAGCACAGATACGCAGTATTTT	TRBV5-1		TRBJ2-3	TRBV5	TRBJ2	CASSSPDSTDTQYF	TGCGCCAGCAGCTCGCCGGACAGCACAGATACGCAGTATTTT	:::::::::0::13:::::21:21:42:::	CD4
244	TGCGCCAGCAGCTCGGACGTGGGAGGTGAGCAGTTCTTC	TRBV5-1	TRBD2	TRBJ2-1	TRBV5	TRBJ2	CASSSDVGGEQFF	TGCGCCAGCAGCTCGGACGTGGGAGGTGAGCAGTTCTTC	:::::::::0:16:16:20:::26:26::39:::	CD4
245	TGCGCCAGCAGCTCGGGGCAGGGAACCTATGGCTACACCTTC	TRBV5-1	TRBD1	TRBJ1-2	TRBV5	TRBJ1	CASSSGQGTYGYTF	TGCGCCAGCAGCTCGGGGCAGGGAACCTATGGCTACACCTTC	:::::::::0:16:16:18:::23:26::42:::	CD4
246	TGCGCCAGCAGCTCGGGTGGACAGGGGGCAGACTATGGCTACACCTTC	TRBV5-1	TRBD1	TRBJ1-2	TRBV5	TRBJ1	CASSSGGQGADYGYTF	TGCGCCAGCAGCTCGGGTGGACAGGGGGCAGACTATGGCTACACCTTC	:::::::::0:16:16:18::29:29:31::48:::	CD8
247	TGCGCCAGCAGCTGGACTGACAGCGCACCTTTCTACGAGCAGTACTTC	TRBV5-1	TRBD1	TRBJ2-7	TRBV5	TRBJ2	CASSWTDSAPFYEQYF	TGCGCCAGCAGCTGGACTGACAGCGCACCTTTCTACGAGCAGTACTTC	:::::::::0::13:18:::23:32::48:::	CD8
248	TGCGCCAGCAGCTTAAACCTCCTCTCGTCCAATGAGCAGTTCTTC	TRBV5-1	TRBD2	TRBJ2-1	TRBV5	TRBJ2	CASSLNLLSSNEQFF	TGCGCCAGCAGCTTAAACCTCCTCTCGTCCAATGAGCAGTTCTTC	:::::::::0::14:17:::22:23:23:45:::	CD4
249	TGCGCCAGCAGCTTACAGGGCGATGAGCAGTTCTTC	TRBV5-1	TRBD1	TRBJ2-1	TRBV5	TRBJ2	CASSLQGDEQFF	TGCGCCAGCAGCTTACAGGGCGATGAGCAGTTCTTC	:::::::::0::14:14:::20:22::36:::	CD4
250	TGCGCCAGCAGCTTACTAGGGGGGATTCAAGAGACCCAGTACTTC	TRBV5-1	TRBD2	TRBJ2-5	TRBV5	TRBJ2	CASSLLGGIQETQYF	TGCGCCAGCAGCTTACTAGGGGGGATTCAAGAGACCCAGTACTTC	:::::::::0::14:14:::23:27::45:::	CD4
251	TGCGCCAGCAGCTTATACGTGTCGGCAGATACGCAGTATTTT	TRBV5-1		TRBJ2-3	TRBV5	TRBJ2	CASSLYVSADTQYF	TGCGCCAGCAGCTTATACGTGTCGGCAGATACGCAGTATTTT	:::::::::0::14:::::25::42:::	CD4
252	TGCGCCAGCAGCTTCCAGGGGTCTGAAGCTTTCTTT	TRBV5-1	TRBD1	TRBJ1-1	TRBV5	TRBJ1	CASSFQGSEAFF	TGCGCCAGCAGCTTCCAGGGGTCTGAAGCTTTCTTT	:::::::::0::14:15:::21:22::36:::	CD4
253	TGCGCCAGCAGCTTCGACTCTACCGGGGAGCTGTTTTTT	TRBV5-1		TRBJ2-2	TRBV5	TRBJ2	CASSFDSTGELFF	TGCGCCAGCAGCTTCGACTCTACCGGGGAGCTGTTTTTT	:::::::::0::14:::::21::39:::	CD8
254	TGCGCCAGCAGCTTCGGACAGGACCCAGATACGCAGTATTTT	TRBV5-1	TRBD1	TRBJ2-3	TRBV5	TRBJ2	CASSFGQDPDTQYF	TGCGCCAGCAGCTTCGGACAGGACCCAGATACGCAGTATTTT	:::::::::0::14:15:::22:25::42:::	CD4
255	TGCGCCAGCAGCTTCTCGACAGGAACCTACGAGCAGTACTTC	TRBV5-1	TRBD1	TRBJ2-7	TRBV5	TRBJ2	CASSFSTGTYEQYF	TGCGCCAGCAGCTTCTCGACAGGAACCTACGAGCAGTACTTC	:::::::::0::14:17:::23:25::42:::	CD4
256	TGCGCCAGCAGCTTGATGTCAGGAGAAAATGAGCAGTTCTTC	TRBV5-1		TRBJ2-1	TRBV5	TRBJ2	CASSLMSGENEQFF	TGCGCCAGCAGCTTGATGTCAGGAGAAAATGAGCAGTTCTTC	:::::::::0::15:::::27::42:::	CD4
257	TGCGCCAGCAGCTTGCTATCTGGACAGAGCTCCTACAATGAGCAGTTCTTC	TRBV5-1	TRBD1	TRBJ2-1	TRBV5	TRBJ2	CASSLLSGQSSYNEQFF	TGCGCCAGCAGCTTGCTATCTGGACAGAGCTCCTACAATGAGCAGTTCTTC	:::::::::0::15:21:::26:26:29:51:::	CD4
258	TGCGCCAGCAGCTTGGAACAGGGCTATGGCTACACCTTC	TRBV5-1	TRBD1	TRBJ1-2	TRBV5	TRBJ1	CASSLEQGYGYTF	TGCGCCAGCAGCTTGGAACAGGGCTATGGCTACACCTTC	:::::::::0:16:16:17:::23:23::39:::	CD4
259	TGCGCCAGCAGCTTGGAACCCGATCAGCCCCAGCATTTT	TRBV5-1		TRBJ1-5	TRBV5	TRBJ1	CASSLEPDQPQHF	TGCGCCAGCAGCTTGGAACCCGATCAGCCCCAGCATTTT	:::::::::0:16:16:::::22::39:::	CD4
260	TGCGCCAGCAGCTTGGAAGGGTCGGGTGGGGCCAACGTCCTGACTTTC	TRBV5-1		TRBJ2-6	TRBV5	TRBJ2	CASSLEGSGGANVLTF	TGCGCCAGCAGCTTGGAAGGGTCGGGTGGGGCCAACGTCCTGACTTTC	:::::::::0:16:16:::::26::48:::	CD4
261	TGCGCCAGCAGCTTGGAATACGTAGGGAATTCACCCCTCCACTTT	TRBV5-1		TRBJ1-6	TRBV5	TRBJ1	CASSLEYVGNSPLHF	TGCGCCAGCAGCTTGGAATACGTAGGGAATTCACCCCTCCACTTT	:::::::::0:16:16:::::27::45:::	CD4
262	TGCGCCAGCAGCTTGGAATGGGGAACTGGAAACACCATATATTTT	TRBV5-1		TRBJ1-3	TRBV5	TRBJ1	CASSLEWGTGNTIYF	TGCGCCAGCAGCTTGGAATGGGGAACTGGAAACACCATATATTTT	:::::::::0:16:16:::::25::45:::	CD4
263	TGCGCCAGCAGCTTGGACCCAAACGACTATGGCTACACCTTC	TRBV5-1		TRBJ1-2	TRBV5	TRBJ1	CASSLDPNDYGYTF	TGCGCCAGCAGCTTGGACCCAAACGACTATGGCTACACCTTC	:::::::::0:16:16:::::25::42:::	CD4
264	TGCGCCAGCAGCTTGGACCCCCCAGATGCAGGAAACACCATATATTTT	TRBV5-1	TRBD1	TRBJ1-3	TRBV5	TRBJ1	CASSLDPPDAGNTIYF	TGCGCCAGCAGCTTGGACCCCCCAGATGCAGGAAACACCATATATTTT	:::::::::0:16:16:17:::22:30::48:::	CD4
265	TGCGCCAGCAGCTTGGACGAAGCCTACGAGCAGTACTTC	TRBV5-1		TRBJ2-7	TRBV5	TRBJ2	CASSLDEAYEQYF	TGCGCCAGCAGCTTGGACGAAGCCTACGAGCAGTACTTC	:::::::::0:17:23:::::22::39:::	CD8
266	TGCGCCAGCAGCTTGGACGGAGACCCACTACGGGAGCAGTACGTC	TRBV5-1		TRBJ2-7	TRBV5	TRBJ2	CASSLDGDPLREQYV	TGCGCCAGCAGCTTGGACGGAGACCCACTACGGGAGCAGTACGTC	:::::::::0:16:16:::::33::45:::	CD4
267	TGCGCCAGCAGCTTGGAGAGCACAGATACGCAGTATTTT	TRBV5-1		TRBJ2-3	TRBV5	TRBJ2	CASSLESTDTQYF	TGCGCCAGCAGCTTGGAGAGCACAGATACGCAGTATTTT	:::::::::0:16:16:::::18:18:39:::	CD4
268	TGCGCCAGCAGCTTGGAGAGGATGGATCAGCCCCAGCATTTT	TRBV5-1		TRBJ1-5	TRBV5	TRBJ1	CASSLERMDQPQHF	TGCGCCAGCAGCTTGGAGAGGATGGATCAGCCCCAGCATTTT	:::::::::0:16:16:::::25::42:::	CD4
269	TGCGCCAGCAGCTTGGAGGCGAGAATCACCTACAATGAGCAGTTCTTC	TRBV5-1		TRBJ2-1	TRBV5	TRBJ2	CASSLEARITYNEQFF	TGCGCCAGCAGCTTGGAGGCGAGAATCACCTACAATGAGCAGTTCTTC	:::::::::0:16:16:::::28::48:::	CD4
270	TGCGCCAGCAGCTTGGAGGGGCTGATCTATGGCTACACCTTC	TRBV5-1	TRBD1	TRBJ1-2	TRBV5	TRBJ1	CASSLEGLIYGYTF	TGCGCCAGCAGCTTGGAGGGGCTGATCTATGGCTACACCTTC	:::::::::0:16:16:16:::21:26::42:::	CD4
271	TGCGCCAGCAGCTTGGCCAGGGCAAACACCGGGGAGCTGTTTTTT	TRBV5-1		TRBJ2-2	TRBV5	TRBJ2	CASSLARANTGELFF	TGCGCCAGCAGCTTGGCCAGGGCAAACACCGGGGAGCTGTTTTTT	:::::::::0:16:19:::::21:22:45:::	CD4
272	TGCGCCAGCAGCTTGGCCCCAGGGCCCTACGAGCAGTACTTC	TRBV5-1		TRBJ2-7	TRBV5	TRBJ2	CASSLAPGPYEQYF	TGCGCCAGCAGCTTGGCCCCAGGGCCCTACGAGCAGTACTTC	:::::::::0:16:18:::::20:24:42:::	CD4
273	TGCGCCAGCAGCTTGGCCGAGGCTTACGAGCAGTACTTC	TRBV5-1		TRBJ2-7	TRBV5	TRBJ2	CASSLAEAYEQYF	TGCGCCAGCAGCTTGGCCGAGGCTTACGAGCAGTACTTC	:::::::::0:16:21:::::24::39:::	CD8
274	TGCGCCAGCAGCTTGGCCGGCGGGGGCGGAGAGACCCAGTACTTC	TRBV5-1	TRBD1	TRBJ2-5	TRBV5	TRBJ2	CASSLAGGGGETQYF	TGCGCCAGCAGCTTGGCCGGCGGGGGCGGAGAGACCCAGTACTTC	:::::::::0:16:18:21::27:28:29::45:::	CD4
275	TGCGCCAGCAGCTTGGCCTGGGGAAATCCCACAGATACGCAGTATTTT	TRBV5-1		TRBJ2-3	TRBV5	TRBJ2	CASSLAWGNPTDTQYF	TGCGCCAGCAGCTTGGCCTGGGGAAATCCCACAGATACGCAGTATTTT	:::::::::0:16:18:::::29::48:::	CD4
276	TGCGCCAGCAGCTTGGCGGACAGGGGGCGTGAAGCTTTCTTT	TRBV5-1	TRBD1	TRBJ1-1	TRBV5	TRBJ1	CASSLADRGREAFF	TGCGCCAGCAGCTTGGCGGACAGGGGGCGTGAAGCTTTCTTT	:::::::::0:16:17:17::28:29:29::42:::	CD4
277	TGCGCCAGCAGCTTGGCGTACCTGAACACTGAAGCTTTCTTT	TRBV5-1		TRBJ1-1	TRBV5	TRBJ1	CASSLAYLNTEAFF	TGCGCCAGCAGCTTGGCGTACCTGAACACTGAAGCTTTCTTT	:::::::::0:16:17:::::22:22:42:::	CD8
278	TGCGCCAGCAGCTTGGGAAACGGAGGCGAGCAGTACTTC	TRBV5-1	TRBD2	TRBJ2-7	TRBV5	TRBJ2	CASSLGNGGEQYF	TGCGCCAGCAGCTTGGGAAACGGAGGCGAGCAGTACTTC	:::::::::0:16:16:21:::26:26::39:::	CD4
279	TGCGCCAGCAGCTTGGGGACAGGTGGCAATCAGCCCCAGCATTTT	TRBV5-1	TRBD1	TRBJ1-5	TRBV5	TRBJ1	CASSLGTGGNQPQHF	TGCGCCAGCAGCTTGGGGACAGGTGGCAATCAGCCCCAGCATTTT	:::::::::0:16:16:16:::23:25::45:::	CD8
280	TGCGCCAGCAGCTTGGGGGACAGCGTAGATCAGCCCCAGCATTTT	TRBV5-1	TRBD1	TRBJ1-5	TRBV5	TRBJ1	CASSLGDSVDQPQHF	TGCGCCAGCAGCTTGGGGGACAGCGTAGATCAGCCCCAGCATTTT	:::::::::0:16:16:16:16::23:28::45:::	CD4
281	TGCGCCAGCAGCTTGGGGGACAGTTTAAGGCCCCTCCACTTT	TRBV5-1	TRBD1	TRBJ1-6	TRBV5	TRBJ1	CASSLGDSLRPLHF	TGCGCCAGCAGCTTGGGGGACAGTTTAAGGCCCCTCCACTTT	:::::::::0:16:16:16:16::23:30::42:::	CD4
282	TGCGCCAGCAGCTTGGGGGGGGGGCGCAATGAGCAGTTCTTC	TRBV5-1	TRBD1	TRBJ2-1	TRBV5	TRBJ2	CASSLGGGRNEQFF	TGCGCCAGCAGCTTGGGGGGGGGGCGCAATGAGCAGTTCTTC	:::::::::0:16:16:19::25:26:26::42:::	CD4
283	TGCGCCAGCAGCTTGGTAAGAGGGGCCAACGTCCTGACTTTC	TRBV5-1		TRBJ2-6	TRBV5	TRBJ2	CASSLVRGANVLTF	TGCGCCAGCAGCTTGGTAAGAGGGGCCAACGTCCTGACTTTC	:::::::::0:16:16:::::21::42:::	CD4
284	TGCGCCAGCAGCTTGGTGGTGGGGGCCAACAATGAGCAGTTCTTC	TRBV5-1	TRBD1	TRBJ2-1	TRBV5	TRBJ2	CASSLVVGANNEQFF	TGCGCCAGCAGCTTGGTGGTGGGGGCCAACAATGAGCAGTTCTTC	:::::::::0:16:16:20:::25:25::45:::	CD4
285	TGCGCCAGCAGCTTTCAGGGGGGCACTGAAGCTTTCTTT	TRBV4-1	TRBD1	TRBJ1-1	TRBV4	TRBJ1	CASSFQGGTEAFF	TGCGCCAGCAGCTTTCAGGGGGGCACTGAAGCTTTCTTT	:::::::::0::12:15:::22:23::39:::	CD8
286	TGCGCCAGCAGCTTTCTCGGGGTCGATGGGGAGACCCAGTACTTC	TRBV5-1		TRBJ2-5	TRBV5	TRBJ2	CASSFLGVDGETQYF	TGCGCCAGCAGCTTTCTCGGGGTCGATGGGGAGACCCAGTACTTC	:::::::::0::14:::::30::45:::	CD4
287	TGCGCCAGCAGCTTTGTCAGGCTCCAAGGAAACACTGAAGCTTTCTTT	TRBV5-1		TRBJ1-1	TRBV5	TRBJ1	CASSFVRLQGNTEAFF	TGCGCCAGCAGCTTTGTCAGGCTCCAAGGAAACACTGAAGCTTTCTTT	:::::::::0:16:23:::::30::48:::	CD8
288	TGCGCCAGCAGCTTTTCCGGGACAGGGAACAATGAGCAGTTCTTC	TRBV5-1	TRBD1	TRBJ2-1	TRBV5	TRBJ2	CASSFSGTGNNEQFF	TGCGCCAGCAGCTTTTCCGGGACAGGGAACAATGAGCAGTTCTTC	:::::::::0::14:16:18::27:28::45:::	CD8
289	TGCGCCAGCAGGAATCCCCGGAGCTCCTACGAGCAGTACTTC	TRBV5-1		TRBJ2-7	TRBV5	TRBJ2	CASRNPRSSYEQYF	TGCGCCAGCAGGAATCCCCGGAGCTCCTACGAGCAGTACTTC	:::::::::0::11:::::19:23:42:::	CD8
290	TGCGCCAGCAGGCAGGGACAGGGGGGCTACACCTTC	TRBV4-1	TRBD1	TRBJ1-2	TRBV4	TRBJ1	CASRQGQGGYTF	TGCGCCAGCAGGCAGGGACAGGGGGGCTACACCTTC	:::::::::0::14:14:14::24:24::36:::	CD8
291	TGCGCCAGCAGGGAAGGGACTAGCGGGGGGCAAAATACGCAGTATTTT	TRBV5-1	TRBD2	TRBJ2-3	TRBV5	TRBJ2	CASREGTSGGQNTQYF	TGCGCCAGCAGGGAAGGGACTAGCGGGGGGCAAAATACGCAGTATTTT	:::::::::0::11:15:15:30:31:34::48:::	CD4
292	TGCGCCAGCAGGGACATGAATTACGAGCAGTACTTC	TRBV5-1	TRBD1	TRBJ2-7	TRBV5	TRBJ2	CASRDMNYEQYF	TGCGCCAGCAGGGACATGAATTACGAGCAGTACTTC	:::::::::0::11:11:::16:21::36:::	CD4
293	TGCGCCAGCAGGGCGGAGCTATCTATGAACACTGAAGCTTTCTTT	TRBV5-1		TRBJ1-1	TRBV5	TRBJ1	CASRAELSMNTEAFF	TGCGCCAGCAGGGCGGAGCTATCTATGAACACTGAAGCTTTCTTT	:::::::::0::11:::::24:25:45:::	CD4
294	TGCGCCAGCAGGTCCGGGACAACGAACTATGGCTACACCTTC	TRBV4-1	TRBD1	TRBJ1-2	TRBV4	TRBJ1	CASRSGTTNYGYTF	TGCGCCAGCAGGTCCGGGACAACGAACTATGGCTACACCTTC	:::::::::0::11:13:15::21:24::42:::	CD8
295	TGCGCCAGCAGTAACCTAGCGGGGGGGGAAGAGACCCAGTACTTC	TRBV5-1	TRBD2	TRBJ2-5	TRBV5	TRBJ2	CASSNLAGGEETQYF	TGCGCCAGCAGTAACCTAGCGGGGGGGGAAGAGACCCAGTACTTC	:::::::::0::11:15::27:27:28::45:::	CD4
296	TGCGCCAGCAGTCAACCAGGACAGGGGCCCCCTACGAGCAGTACTTC	TRBV23-1	TRBD1	TRBJ2-7	TRBV23	TRBJ2	CASSQPGQ_APYEQYF	TGCGCCAGCAGTCAACCAGGACAGGGGCCCCCTACGAGCAGTACTTC	:::::::::0::15:15:17::27:30::47:::	CD8
297	TGCGCCAGCAGTCAAGAGGCAGCCAGCTCCTATAATTCACCCCTCCACTTT	TRBV23-1		TRBJ1-6	TRBV23	TRBJ1	CASSQEAASSYNSPLHF	TGCGCCAGCAGTCAAGAGGCAGCCAGCTCCTATAATTCACCCCTCCACTTT	:::::::::0::15:::::24:26:51:::	CD8
298	TGCGCCAGCAGTCAATCCCCGTGGTCCAGGGGGGTATAGCTGTTTTTT	TRBV23-1	TRBD1	TRBJ2-2	TRBV23	TRBJ2	CASSQSPWSRGV*LFF	TGCGCCAGCAGTCAATCCCCGTGGTCCAGGGGGGTATAGCTGTTTTTT	:::::::::0:17:17:26:::33:37::48:::	CD8
299	TGCGCCAGCAGTCCCTAGGGAGGAGGGCCTGAGAGCAGTACTTC	TRBV23-1		TRBJ2-7	TRBV23	TRBJ2	CASSP*G_RA*EQYF	TGCGCCAGCAGTCCCTAGGGAGGAGGGCCTGAGAGCAGTACTTC	:::::::::0::13:::::20:25:44:::	CD8
300	TGCGCCAGCAGTCTCTTAGCACAGATACGCAGTATTTT	TRBV23-1		TRBJ2-3	TRBV23	TRBJ2	CASSLL_TDTQYF	TGCGCCAGCAGTCTCTTAGCACAGATACGCAGTATTTT	:::::::::0::13:::::16:17:38:::	CD8
301	TGCGCCAGCAGTCTTGAGGTAGGCACTGAAGCTTTCTTT	TRBV5-1		TRBJ1-1	TRBV5	TRBJ1	CASSLEVGTEAFF	TGCGCCAGCAGTCTTGAGGTAGGCACTGAAGCTTTCTTT	:::::::::0::16:::::23::39:::	CD8
302	TGCGCCAGCAGTGAGATCCGAGGGACAGGGTCCCACGAGCAGTACTTC	TRBV10-1	TRBD1	TRBJ2-7	TRBV10	TRBJ2	CASSEIRGTGSHEQYF	TGCGCCAGCAGTGAGATCCGAGGGACAGGGTCCCACGAGCAGTACTTC	:::::::::0::15:21:21::30:30::48:::	CD8
303	TGCGCCAGCAGTGAGGAGGAGGTAGCCTACGAGCAGTACTTC	TRBV10-2	TRBD2	TRBJ2-7	TRBV10	TRBJ2	CASSEEEVAYEQYF	TGCGCCAGCAGTGAGGAGGAGGTAGCCTACGAGCAGTACTTC	:::::::::0::15:17:::22:25::42:::	CD8
304	TGCGCCAGCAGTGAGGGAAGGACAGGGGACTACAATGAGCAGTTCTTC	TRBV10-1	TRBD1	TRBJ2-1	TRBV10	TRBJ2	CASSEGRTGDYNEQFF	TGCGCCAGCAGTGAGGGAAGGACAGGGGACTACAATGAGCAGTTCTTC	:::::::::0::15:19:::28:29::48:::	CD4
305	TGCGCCAGCAGTGAGTCGGGGACTAGCGAATACAATGAGCAGTTCTTC	TRBV10-1	TRBD2	TRBJ2-1	TRBV10	TRBJ2	CASSESGTSEYNEQFF	TGCGCCAGCAGTGAGTCGGGGACTAGCGAATACAATGAGCAGTTCTTC	:::::::::0:17:18:18:18::28:30::48:::	CD4
306	TGCGCCAGCAGTGCTACGGGTGCCTACGAGCAGTACTTC	TRBV10-2		TRBJ2-7	TRBV10	TRBJ2	CASSATGAYEQYF	TGCGCCAGCAGTGCTACGGGTGCCTACGAGCAGTACTTC	:::::::::0::13:::::22::39:::	CD8
307	TGCGCCAGCAGTGTTGAGCGGGAAACTTACGAGCAGTACTTC	TRBV10-2	TRBD2	TRBJ2-7	TRBV10	TRBJ2	CASSVERETYEQYF	TGCGCCAGCAGTGTTGAGCGGGAAACTTACGAGCAGTACTTC	:::::::::0::13:16:::23:27::42:::	CD8
308	TGCGCCAGCAGTTAACAGGGGGCAATCGGGGAGCTGTTTTTT	TRBV5-1	TRBD1	TRBJ2-2	TRBV5	TRBJ2	CASS*QGAIGELFF	TGCGCCAGCAGTTAACAGGGGGCAATCGGGGAGCTGTTTTTT	:::::::::0::11:14::23:23:26::42:::	CD8
309	TGCGCCAGCCGACGGACAGCAGGAGCCCACAGCCCCAGCATTTT	TRBV23-1	TRBD2	TRBJ1-5	TRBV23	TRBJ1	CASRRTA_SPQPQHF	TGCGCCAGCCGACGGACAGCAGGAGCCCACAGCCCCAGCATTTT	:::::::::0::9:13:::25:29::44:::	CD8
310	TGCGCCAGCCGGCGGGAGGGAACGATGAACACTGAAGCTTTCTTT	TRBV5-1	TRBD2	TRBJ1-1	TRBV5	TRBJ1	CASRREGTMNTEAFF	TGCGCCAGCCGGCGGGAGGGAACGATGAACACTGAAGCTTTCTTT	:::::::::0::9:11::20:20:24:25:45:::	CD4
311	TGCGCCAGCCGGGACGGAGCCTACGAGCAGTACTTC	TRBV5-1	TRBD1	TRBJ2-7	TRBV5	TRBJ2	CASRDGAYEQYF	TGCGCCAGCCGGGACGGAGCCTACGAGCAGTACTTC	:::::::::0::9:9:10::15:19::36:::	CD4
312	TGCGCCAGCCGGGGAGGGGGACAGGGGATACAGAACTATGGCTACACCTTC	TRBV4-1	TRBD1	TRBJ1-2	TRBV4	TRBJ1	CASRGGGQGIQNYGYTF	TGCGCCAGCCGGGGAGGGGGACAGGGGATACAGAACTATGGCTACACCTTC	:::::::::0::9:17:17::27:33::51:::	CD8
313	TGCGCCAGCCTTGGCGAGGGGAGAAGCACCGGGGAGCTGTTTTTT	TRBV10-2	TRBD1	TRBJ2-2	TRBV10	TRBJ2	CASLGEGRSTGELFF	TGCGCCAGCCTTGGCGAGGGGAGAAGCACCGGGGAGCTGTTTTTT	:::::::::0::9:16:::21:22::45:::	CD8
314	TGCGCCAGCGGGGTCGGAACCTACAATGAGCAGTTCTTC	TRBV5-1		TRBJ2-1	TRBV5	TRBJ2	CASGVGTYNEQFF	TGCGCCAGCGGGGTCGGAACCTACAATGAGCAGTTCTTC	:::::::::0::9:::::19::39:::	CD4
315	TGCGCCAGCTCCCCATGGCGGGGGGCCTACAATGAGCAGTTCTTC	TRBV23-1	TRBD2	TRBJ2-1	TRBV23	TRBJ2	CASSPWRGAYNEQFF	TGCGCCAGCTCCCCATGGCGGGGGGCCTACAATGAGCAGTTCTTC	:::::::::0::9:17::25:25:25::45:::	CD8
316	TGCGCCAGCTTAGGTCCGAATAATTCACCCCTCCACTTT	TRBV10-2		TRBJ1-6	TRBV10	TRBJ1	CASLGPNNSPLHF	TGCGCCAGCTTAGGTCCGAATAATTCACCCCTCCACTTT	:::::::::0::9:::::19::39:::	CD8
317	TGCTCCCAGGGGGACAGGGGTCTTAACACTGAAGCTTTCTTT	TRBV19	TRBD1	TRBJ1-1	TRBV19*00	TRBJ1	CSQGDRGLNTEAFF	TGCTCCCAGGGGGACAGGGGTCTTAACACTGAAGCTTTCTTT	:::::::::0::9:10:10::20:24::42:::	CD8
318	TGTGCCAACTAGCACCCGGGGCTCATCTTCAATCAGCCCCAGCATTTT	TRBV6-4	TRBD2	TRBJ1-5	TRBV6	TRBJ1	CAN*HPGLIFNQPQHF	TGTGCCAACTAGCACCCGGGGCTCATCTTCAATCAGCCCCAGCATTTT	:::::::::0::7:14:17::23:29::48:::	CD4
319	TGTGCCAATACGGGACTGAACACCGGGGAGCTGTTTTTT	TRBV7-3	TRBD2	TRBJ2-2	TRBV7	TRBJ2	CANTGLNTGELFF	TGTGCCAATACGGGACTGAACACCGGGGAGCTGTTTTTT	:::::::::0::7:10:11::17:17::39:::	CD8
320	TGTGCCACACTATCCGGGACAACGAACACCGGGGAGCTGTTTTTT	TRBV2	TRBD1	TRBJ2-2	TRBV2*00	TRBJ2	CATLSGTTNTGELFF	TGTGCCACACTATCCGGGACAACGAACACCGGGGAGCTGTTTTTT	:::::::::0::7:13:15::21:22:22:45:::	CD4
321	TGTGCCACAGGCCGGTCCTCGACCTACGAGCAGTACTTC	TRBV15		TRBJ2-7	TRBV15*00	TRBJ2	CATGRSSTYEQYF	TGTGCCACAGGCCGGTCCTCGACCTACGAGCAGTACTTC	:::::::::0::8:::::22::39:::	CD8
322	TGTGCCACCAAACCGGGCCCCGGTTCGCCCCAGCATTTT	TRBV2	TRBD2	TRBJ1-5	TRBV2*00	TRBJ1	CATKPGPGSPQHF	TGTGCCACCAAACCGGGCCCCGGTTCGCCCCAGCATTTT	:::::::::0::10:14::17:20:26::39:::	CD4
323	TGTGCCACCACGGAGGGGGGGGCCTACGAGCAGTACTTC	TRBV6-1	TRBD1	TRBJ2-7	TRBV6	TRBJ2	CATTEGGAYEQYF	TGTGCCACCACGGAGGGGGGGGCCTACGAGCAGTACTTC	:::::::::0::10:13:::19:22::39:::	CD8
324	TGTGCCACCACTAACCGACCCTCTGGGGCCAACGTCCTGACTTTC	TRBV27		TRBJ2-6	TRBV27*00	TRBJ2	CATTNRPSGANVLTF	TGTGCCACCACTAACCGACCCTCTGGGGCCAACGTCCTGACTTTC	:::::::::0::10:::::20:20:45:::	CD8
325	TGTGCCACCAGCACCCGGGCCGCCGGCGAGCAGTACTTC	TRBV15	TRBD1	TRBJ2-7	TRBV15*00	TRBJ2	CATSTRAAGEQYF	TGTGCCACCAGCACCCGGGCCGCCGGCGAGCAGTACTTC	:::::::::0::13:13:16::19:26::39:::	CD8
326	TGTGCCACCAGCACCGCAACAGGGGGATACGAGCAGTACTTC	TRBV15	TRBD1	TRBJ2-7	TRBV15*00	TRBJ2	CATSTATGGYEQYF	TGTGCCACCAGCACCGCAACAGGGGGATACGAGCAGTACTTC	:::::::::0::13:18:::26:27::42:::	CD8
327	TGTGCCACCAGCACCGCCGAGAACTATGGCTACACCTTC	TRBV15		TRBJ1-2	TRBV15*00	TRBJ1	CATSTAENYGYTF	TGTGCCACCAGCACCGCCGAGAACTATGGCTACACCTTC	:::::::::0::13:::::21::39:::	CD8
328	TGTGCCACCAGCACGGGCTTGGCCTACGAGCAGTACGTC	TRBV15		TRBJ2-7	TRBV15*00	TRBJ2	CATSTGLAYEQYV	TGTGCCACCAGCACGGGCTTGGCCTACGAGCAGTACGTC	:::::::::0::13:::::22::39:::	CD8
329	TGTGCCACCAGCAGAACCGACAGGATCCTCATCGAGCAGTACTTC	TRBV15	TRBD1	TRBJ2-7	TRBV15*00	TRBJ2	CATSRTDRILIEQYF	TGTGCCACCAGCAGAACCGACAGGATCCTCATCGAGCAGTACTTC	:::::::::0::15:18:::24:25::45:::	CD8
330	TGTGCCACCAGCAGACAGGCGAATACAGATACGCAGTATTTT	TRBV15		TRBJ2-3	TRBV15*00	TRBJ2	CATSRQANTDTQYF	TGTGCCACCAGCAGACAGGCGAATACAGATACGCAGTATTTT	:::::::::0::15:::::24::42:::	CD8
331	TGTGCCACCAGCAGAGAGGAAAGGAGGGCTAATGAAAAACTGTTTTTT	TRBV15	TRBD2	TRBJ1-4	TRBV15*00	TRBJ1	CATSREERRANEKLFF	TGTGCCACCAGCAGAGAGGAAAGGAGGGCTAATGAAAAACTGTTTTTT	:::::::::0:17:17:22::28:28:28::48:::	CD8
332	TGTGCCACCAGCAGAGAGGTCGCGGGTTACAATGAGCAGTTCTTC	TRBV15	TRBD1	TRBJ2-1	TRBV15*00	TRBJ2	CATSREVAGYNEQFF	TGTGCCACCAGCAGAGAGGTCGCGGGTTACAATGAGCAGTTCTTC	:::::::::0:17:17:18:23::26:27::45:::	CD4
333	TGTGCCACCAGCAGAGATCAAGAGGGAGCCAATCAGCCCCAGCATTTT	TRBV15	TRBD2	TRBJ1-5	TRBV15*00	TRBJ1	CATSRDQEGANQPQHF	TGTGCCACCAGCAGAGATCAAGAGGGAGCCAATCAGCCCCAGCATTTT	:::::::::0:17:19:20:::28:29::48:::	CD8
334	TGTGCCACCAGCAGAGATCGACCAGGCCAGCCCCAGCATTTT	TRBV15		TRBJ1-5	TRBV15*00	TRBJ1	CATSRDRPGQPQHF	TGTGCCACCAGCAGAGATCGACCAGGCCAGCCCCAGCATTTT	:::::::::0:17:19:::::27::42:::	CD8
335	TGTGCCACCAGCAGAGATCTCCCGACAGGACGACAAGAGACCCAGTACTTC	TRBV15	TRBD1	TRBJ2-5	TRBV15*00	TRBJ2	CATSRDLPTGRQETQYF	TGTGCCACCAGCAGAGATCTCCCGACAGGACGACAAGAGACCCAGTACTTC	:::::::::0:17:21:23:::29:33::51:::	CD8
336	TGTGCCACCAGCAGAGATGCGGACGGGCCCAGATCACCCCTCCACTTT	TRBV15	TRBD2	TRBJ1-6	TRBV15*00	TRBJ1	CATSRDADGPRSPLHF	TGTGCCACCAGCAGAGATGCGGACGGGCCCAGATCACCCCTCCACTTT	:::::::::0:17:18:20::27:30:33::48:::	CD4
337	TGTGCCACCAGCAGAGATTCCCCCATACTCAGCATTCAGTACTTC	TRBV15	TRBD1	TRBJ2-4	TRBV15*00	TRBJ2	CATSRDSPILSIQYF	TGTGCCACCAGCAGAGATTCCCCCATACTCAGCATTCAGTACTTC	:::::::::0:17:18:19:::24:32::45:::	CD4
338	TGTGCCACCAGCAGAGATTGGCTAGCGGGGGGGCAAGAGACCCAGTACTTC	TRBV15	TRBD2	TRBJ2-5	TRBV15*00	TRBJ2	CATSRDWLAGGQETQYF	TGTGCCACCAGCAGAGATTGGCTAGCGGGGGGGCAAGAGACCCAGTACTTC	:::::::::0:17:18:21::33:33:33::51:::	CD8
339	TGTGCCACCAGCAGAGCCCCACTAGCGGGGGGTAATGAGCAGTTCTTC	TRBV15	TRBD2	TRBJ2-1	TRBV15*00	TRBJ2	CATSRAPLAGGNEQFF	TGTGCCACCAGCAGAGCCCCACTAGCGGGGGGTAATGAGCAGTTCTTC	:::::::::0::16:20::32:32:33::48:::	CD8
340	TGTGCCACCAGCAGAGCCCCAGGGTACGAGCAGTACGTC	TRBV15	TRBD1	TRBJ2-7	TRBV15*00	TRBJ2	CATSRAPGYEQYV	TGTGCCACCAGCAGAGCCCCAGGGTACGAGCAGTACGTC	:::::::::0::16:19:::24:24::39:::	CD8
341	TGTGCCACCAGCAGAGCCCCCCTAGCGGGGGGCAATGAGCAGTTCTTC	TRBV15	TRBD2	TRBJ2-1	TRBV15*00	TRBJ2	CATSRAPLAGGNEQFF	TGTGCCACCAGCAGAGCCCCCCTAGCGGGGGGCAATGAGCAGTTCTTC	:::::::::0::16:21::32:32:32::48:::	CD8
342	TGTGCCACCAGCAGAGCCGGGGCCTACGAGCAGTACTTC	TRBV15	TRBD1	TRBJ2-7	TRBV15*00	TRBJ2	CATSRAGAYEQYF	TGTGCCACCAGCAGAGCCGGGGCCTACGAGCAGTACTTC	:::::::::0::16:16:18::21:22::39:::	CD8
343	TGTGCCACCAGCAGAGCGACAGGGGCTCAGCCCCAGCATTTT	TRBV15	TRBD1	TRBJ1-5	TRBV15*00	TRBJ1	CATSRATGAQPQHF	TGTGCCACCAGCAGAGCGACAGGGGCTCAGCCCCAGCATTTT	:::::::::0::16:17:::25:26::42:::	CD8
344	TGTGCCACCAGCAGAGCGACGGGCGCTGAAGCTTTCTTT	TRBV15	TRBD1	TRBJ1-1	TRBV15*00	TRBJ1	CATSRATGAEAFF	TGTGCCACCAGCAGAGCGACGGGCGCTGAAGCTTTCTTT	:::::::::0::16:20::24:25:25::39:::	CD8
345	TGTGCCACCAGCAGAGCGAGCCTCACAGATACGCAGTATTTT	TRBV15		TRBJ2-3	TRBV15*00	TRBJ2	CATSRASLTDTQYF	TGTGCCACCAGCAGAGCGAGCCTCACAGATACGCAGTATTTT	:::::::::0::16:::::23::42:::	CD8
346	TGTGCCACCAGCAGAGCGGACCCTGCCTACGAGCAGTACTTC	TRBV15	TRBD1	TRBJ2-7	TRBV15*00	TRBJ2	CATSRADPAYEQYF	TGTGCCACCAGCAGAGCGGACCCTGCCTACGAGCAGTACTTC	:::::::::0::16:20:::25:25::42:::	CD8
347	TGTGCCACCAGCAGAGCGGCAGGTTCCTACGAGCAGTACTTC	TRBV15		TRBJ2-7	TRBV15*00	TRBJ2	CATSRAAGSYEQYF	TGTGCCACCAGCAGAGCGGCAGGTTCCTACGAGCAGTACTTC	:::::::::0::16:::::24::42:::	CD8
348	TGTGCCACCAGCAGAGCGGTAGCGGGGGGCAATGAGCAGTTCTTC	TRBV15	TRBD2	TRBJ2-1	TRBV15*00	TRBJ2	CATSRAVAGGNEQFF	TGTGCCACCAGCAGAGCGGTAGCGGGGGGCAATGAGCAGTTCTTC	:::::::::0::16:19::29:29:29::45:::	CD4
349	TGTGCCACCAGCAGAGCTATGAACACTGAAGCTTTCTTT	TRBV15		TRBJ1-1	TRBV15*00	TRBJ1	CATSRAMNTEAFF	TGTGCCACCAGCAGAGCTATGAACACTGAAGCTTTCTTT	:::::::::0::16:::::18:19:39:::	CD8
350	TGTGCCACCAGCAGAGGACAGAGAACCTACGAGCAGTACTTC	TRBV15	TRBD1	TRBJ2-7	TRBV15*00	TRBJ2	CATSRGQRTYEQYF	TGTGCCACCAGCAGAGGACAGAGAACCTACGAGCAGTACTTC	:::::::::0::16:16:::21:25::42:::	CD8
351	TGTGCCACCAGCAGAGGACAGCTCTACGAGCAGTACTTC	TRBV15		TRBJ2-7	TRBV15*00	TRBJ2	CATSRGQLYEQYF	TGTGCCACCAGCAGAGGACAGCTCTACGAGCAGTACTTC	:::::::::0::16:::::19:21:39:::	CD8
352	TGTGCCACCAGCAGAGGACAGGCCTACGAGCAGTACGTC	TRBV15	TRBD1	TRBJ2-7	TRBV15*00	TRBJ2	CATSRGQAYEQYV	TGTGCCACCAGCAGAGGACAGGCCTACGAGCAGTACGTC	:::::::::0::16:16:::22:22::39:::	CD8
353	TGTGCCACCAGCAGAGGACAGGCGGGCGGTAATTCACCCCTCCACTTT	TRBV15	TRBD1	TRBJ1-6	TRBV15*00	TRBJ1	CATSRGQAGGNSPLHF	TGTGCCACCAGCAGAGGACAGGCGGGCGGTAATTCACCCCTCCACTTT	:::::::::0::16:16::27:28:29::48:::	CD8
354	TGTGCCACCAGCAGAGGACAGGGGCGGACCTACGAGCAGTACTTC	TRBV15	TRBD1	TRBJ2-7	TRBV15*00	TRBJ2	CATSRGQGRTYEQYF	TGTGCCACCAGCAGAGGACAGGGGCGGACCTACGAGCAGTACTTC	:::::::::0::16:16:::24:28::45:::	CD8
355	TGTGCCACCAGCAGAGGACAGGGGTACGAGCAGTACTTC	TRBV15	TRBD1	TRBJ2-7	TRBV15*00	TRBJ2	CATSRGQGYEQYF	TGTGCCACCAGCAGAGGACAGGGGTACGAGCAGTACTTC	:::::::::0::16:16:::24:24::39:::	CD8
356	TGTGCCACCAGCAGAGGACAGGGTTACGAGCAGTACGTC	TRBV15	TRBD1	TRBJ2-7	TRBV15*00	TRBJ2	CATSRGQGYEQYV	TGTGCCACCAGCAGAGGACAGGGTTACGAGCAGTACGTC	:::::::::0::16:16:::23:24::39:::	CD8
357	TGTGCCACCAGCAGAGGACAGGTCTCCTACAATGAGCAGTTCTTC	TRBV15	TRBD1	TRBJ2-1	TRBV15*00	TRBJ2	CATSRGQVSYNEQFF	TGTGCCACCAGCAGAGGACAGGTCTCCTACAATGAGCAGTTCTTC	:::::::::0::16:16:::22:23:23:45:::	CD8
358	TGTGCCACCAGCAGAGGACTAGTTGGTTCCTACAATGAGCAGTTCTTC	TRBV15	TRBD2	TRBJ2-1	TRBV15*00	TRBJ2	CATSRGLVGSYNEQFF	TGTGCCACCAGCAGAGGACTAGTTGGTTCCTACAATGAGCAGTTCTTC	:::::::::0::16:16:::22:27::48:::	CD8
359	TGTGCCACCAGCAGAGGAGAAAACACTGAAGCTTTCTTT	TRBV15		TRBJ1-1	TRBV15*00	TRBJ1	CATSRGENTEAFF	TGTGCCACCAGCAGAGGAGAAAACACTGAAGCTTTCTTT	:::::::::0::16:::::21::39:::	CD8
360	TGTGCCACCAGCAGAGGAGGAGGGTACGAGCAGTACTTC	TRBV15	TRBD2	TRBJ2-7	TRBV15*00	TRBJ2	CATSRGGGYEQYF	TGTGCCACCAGCAGAGGAGGAGGGTACGAGCAGTACTTC	:::::::::0::16:18::24:24:24::39:::	CD8
361	TGTGCCACCAGCAGAGGCAAGGGCTCCTACAATGAGCAGTTCTTC	TRBV15		TRBJ2-1	TRBV15*00	TRBJ2	CATSRGKGSYNEQFF	TGTGCCACCAGCAGAGGCAAGGGCTCCTACAATGAGCAGTTCTTC	:::::::::0::16:::::19:23:45:::	CD8
362	TGTGCCACCAGCAGAGGCCAGAGACTCTACGAGCAGTACTTC	TRBV15		TRBJ2-7	TRBV15*00	TRBJ2	CATSRGQRLYEQYF	TGTGCCACCAGCAGAGGCCAGAGACTCTACGAGCAGTACTTC	:::::::::0::16:::::20:24:42:::	CD8
363	TGTGCCACCAGCAGAGGCCGGAGCTCCTACAATGAGCAGTTCTTC	TRBV15		TRBJ2-1	TRBV15*00	TRBJ2	CATSRGRSSYNEQFF	TGTGCCACCAGCAGAGGCCGGAGCTCCTACAATGAGCAGTTCTTC	:::::::::0::16:::::19:23:45:::	CD8
364	TGTGCCACCAGCAGAGGGATTTCCTACGAGCAGTACGTC	TRBV15		TRBJ2-7	TRBV15*00	TRBJ2	CATSRGISYEQYV	TGTGCCACCAGCAGAGGGATTTCCTACGAGCAGTACGTC	:::::::::0::16:::::21::39:::	CD8
365	TGTGCCACCAGCAGAGGGGAATCCTACGAGCAGTACTTC	TRBV15		TRBJ2-7	TRBV15*00	TRBJ2	CATSRGESYEQYF	TGTGCCACCAGCAGAGGGGAATCCTACGAGCAGTACTTC	:::::::::0::16:::::21::39:::	CD8
366	TGTGCCACCAGCAGAGGGGCAGCTTATAGCAATCAGCCCCAGCATTTT	TRBV15		TRBJ1-5	TRBV15*00	TRBJ1	CATSRGAAYSNQPQHF	TGTGCCACCAGCAGAGGGGCAGCTTATAGCAATCAGCCCCAGCATTTT	:::::::::0::16:::::24:26:48:::	CD8
367	TGTGCCACCAGCAGAGGGGGGGCCTACGAGCAGTACTTC	TRBV15	TRBD1	TRBJ2-7	TRBV15*00	TRBJ2	CATSRGGAYEQYF	TGTGCCACCAGCAGAGGGGGGGCCTACGAGCAGTACTTC	:::::::::0::16:16:::21:22::39:::	CD8
368	TGTGCCACCAGCAGAGGGTCCGGGACAGGGGCCTACGAGCAGTACTTC	TRBV15	TRBD1	TRBJ2-7	TRBV15*00	TRBJ2	CATSRGSGTGAYEQYF	TGTGCCACCAGCAGAGGGTCCGGGACAGGGGCCTACGAGCAGTACTTC	:::::::::0::16:19:21::31:31::48:::	CD8
369	TGTGCCACCAGCAGAGGTCAACAGCCGTTGGACTATGGCTACACCTTC	TRBV15		TRBJ1-2	TRBV15*00	TRBJ1	CATSRGQQPLDYGYTF	TGTGCCACCAGCAGAGGTCAACAGCCGTTGGACTATGGCTACACCTTC	:::::::::0:17:19:::::31::48:::	CD8
370	TGTGCCACCAGCAGAGTAGCCTACGCGTCTCAAGAGACCCAGTACTTC	TRBV15		TRBJ2-5	TRBV15*00	TRBJ2	CATSRVAYASQETQYF	TGTGCCACCAGCAGAGTAGCCTACGCGTCTCAAGAGACCCAGTACTTC	:::::::::0::16:::::30::48:::	CD8
371	TGTGCCACCAGCAGAGTCGAACTTCGCCAAGGGTCCCAGTACTTC	TRBV15		TRBJ2-5	TRBV15*00	TRBJ2	CATSRVELRQGSQYF	TGTGCCACCAGCAGAGTCGAACTTCGCCAAGGGTCCCAGTACTTC	:::::::::0::16:::::26::45:::	CD8
372	TGTGCCACCAGCAGATCCCCAGGGCTCGAGCAGTACGTC	TRBV15	TRBD1	TRBJ2-7	TRBV15*00	TRBJ2	CATSRSPGLEQYV	TGTGCCACCAGCAGATCCCCAGGGCTCGAGCAGTACGTC	:::::::::0::15:19:::24:26::39:::	CD8
373	TGTGCCACCAGCAGATCGCTTGGCTACGAGCAGTACTTC	TRBV15		TRBJ2-7	TRBV15*00	TRBJ2	CATSRSLGYEQYF	TGTGCCACCAGCAGATCGCTTGGCTACGAGCAGTACTTC	:::::::::0::15:::::23::39:::	CD8
374	TGTGCCACCAGCAGCGGACAGAGGAATTACAATGAGCAGTTCTTC	TRBV15	TRBD1	TRBJ2-1	TRBV15*00	TRBJ2	CATSSGQRNYNEQFF	TGTGCCACCAGCAGCGGACAGAGGAATTACAATGAGCAGTTCTTC	:::::::::0::14:15:::24:27::45:::	CD8
375	TGTGCCACCAGCAGCGGGACAGGACCCTACGAGCAGTACGTC	TRBV15	TRBD1	TRBJ2-7	TRBV15*00	TRBJ2	CATSSGTGPYEQYV	TGTGCCACCAGCAGCGGGACAGGACCCTACGAGCAGTACGTC	:::::::::0::14:14:15::20:20:24:42:::	CD8
376	TGTGCCACCAGCAGCGGGACAGGTCCCTACGAGCAGTACTTC	TRBV15	TRBD1	TRBJ2-7	TRBV15*00	TRBJ2	CATSSGTGPYEQYF	TGTGCCACCAGCAGCGGGACAGGTCCCTACGAGCAGTACTTC	:::::::::0::14:14:15::23:25::42:::	CD8
377	TGTGCCACCAGCAGCGGGACCGCATACGAGCAGTACGTC	TRBV15	TRBD1	TRBJ2-7	TRBV15*00	TRBJ2	CATSSGTAYEQYV	TGTGCCACCAGCAGCGGGACCGCATACGAGCAGTACGTC	:::::::::0::14:14:15::20:24::39:::	CD8
378	TGTGCCACCAGCAGGACAGGAGGGCATGAGCAGTTCTTC	TRBV15	TRBD1	TRBJ2-1	TRBV15*00	TRBJ2	CATSRTGGHEQFF	TGTGCCACCAGCAGGACAGGAGGGCATGAGCAGTTCTTC	:::::::::0::14:14::25:25:25::39:::	CD8
379	TGTGCCACCAGCAGGGGACTAGCCTACAATGAGCAGTTCTTC	TRBV15	TRBD2	TRBJ2-1	TRBV15*00	TRBJ2	CATSRGLAYNEQFF	TGTGCCACCAGCAGGGGACTAGCCTACAATGAGCAGTTCTTC	:::::::::0::14:14:14::22:22::42:::	CD8
380	TGTGCCACCAGCAGGGGACTAGCGGGGGCCTACAATGAGCAGTTCTTC	TRBV15	TRBD2	TRBJ2-1	TRBV15*00	TRBJ2	CATSRGLAGAYNEQFF	TGTGCCACCAGCAGGGGACTAGCGGGGGCCTACAATGAGCAGTTCTTC	:::::::::0::14:14:14::26:28::48:::	CD8
381	TGTGCCACCAGCAGGGGCGGAGGGTACGAGCAGTACTTC	TRBV15	TRBD2	TRBJ2-7	TRBV15*00	TRBJ2	CATSRGGGYEQYF	TGTGCCACCAGCAGGGGCGGAGGGTACGAGCAGTACTTC	:::::::::0::14:18::24:24:24::39:::	CD8
382	TGTGCCACCAGCAGGGGGATTTCGGGGCCATACAATGAGCAGTTCTTC	TRBV15	TRBD1	TRBJ2-1	TRBV15*00	TRBJ2	CATSRGISGPYNEQFF	TGTGCCACCAGCAGGGGGATTTCGGGGCCATACAATGAGCAGTTCTTC	:::::::::0::14:23::28:28:30::48:::	CD8
383	TGTGCCACCAGCAGGGGTCTTAGCTCCTACAATGAGCAGTTCTTC	TRBV15		TRBJ2-1	TRBV15*00	TRBJ2	CATSRGLSSYNEQFF	TGTGCCACCAGCAGGGGTCTTAGCTCCTACAATGAGCAGTTCTTC	:::::::::0:17:20:::::21:23:45:::	CD8
384	TGTGCCACCAGCAGGGGTGGACAGGGTGGTAATTCACCCCTCCACTTT	TRBV15	TRBD1	TRBJ1-6	TRBV15*00	TRBJ1	CATSRGGQGGNSPLHF	TGTGCCACCAGCAGGGGTGGACAGGGTGGTAATTCACCCCTCCACTTT	:::::::::0::14:18:::26:29::48:::	CD8
385	TGTGCCACCAGCAGGTCAGGGGGCACTGAAGCTTTCTTT	TRBV15	TRBD1	TRBJ1-1	TRBV15*00	TRBJ1	CATSRSGGTEAFF	TGTGCCACCAGCAGGTCAGGGGGCACTGAAGCTTTCTTT	:::::::::0::14:16:::23:23::39:::	CD8
386	TGTGCCACCAGCAGGTCCAAAGCCTACGAGCAGTACTTC	TRBV15		TRBJ2-7	TRBV15*00	TRBJ2	CATSRSKAYEQYF	TGTGCCACCAGCAGGTCCAAAGCCTACGAGCAGTACTTC	:::::::::0::14:::::22::39:::	CD8
387	TGTGCCACCAGCAGGTTAGCGGGGGAACAAGAGACCCAGTACTTC	TRBV15	TRBD2	TRBJ2-5	TRBV15*00	TRBJ2	CATSRLAGEQETQYF	TGTGCCACCAGCAGGTTAGCGGGGGAACAAGAGACCCAGTACTTC	:::::::::0::14:16:::23:27::45:::	CD8
388	TGTGCCACCAGCAGTAAACTTACGATTACGGAGCAGTTCTTC	TRBV15		TRBJ2-1	TRBV15*00	TRBJ2	CATSSKLTITEQFF	TGTGCCACCAGCAGTAAACTTACGATTACGGAGCAGTTCTTC	:::::::::0::14:::::30::42:::	CD8
389	TGTGCCACCAGCAGTGCTCCGGGGCCTTACGAGCAGTACTTC	TRBV15	TRBD1	TRBJ2-7	TRBV15*00	TRBJ2	CATSSAPGPYEQYF	TGTGCCACCAGCAGTGCTCCGGGGCCTTACGAGCAGTACTTC	:::::::::0::14:18:20::23:27::42:::	CD8
390	TGTGCCACCAGCAGTGGGACAGCCTACGAGCAGTACTTC	TRBV15	TRBD1	TRBJ2-7	TRBV15*00	TRBJ2	CATSSGTAYEQYF	TGTGCCACCAGCAGTGGGACAGCCTACGAGCAGTACTTC	:::::::::0::14:15:15::22:22::39:::	CD8
391	TGTGCCACCAGCATCCTGGAAATAGGGTCAGATACGCAGTATTTT	TRBV15		TRBJ2-3	TRBV15*00	TRBJ2	CATSILEIGSDTQYF	TGTGCCACCAGCATCCTGGAAATAGGGTCAGATACGCAGTATTTT	:::::::::0::13:::::28::45:::	CD8
392	TGTGCCACCAGCATGGCGAGCAATCAGCCCCAGCATTTT	TRBV15		TRBJ1-5	TRBV15*00	TRBJ1	CATSMASNQPQHF	TGTGCCACCAGCATGGCGAGCAATCAGCCCCAGCATTTT	:::::::::0::13:::::18::39:::	CD8
393	TGTGCCACCAGCCAGGGGGGGGCCTACGAGCAGTACTTC	TRBV15	TRBD1	TRBJ2-7	TRBV15*00	TRBJ2	CATSQGGAYEQYF	TGTGCCACCAGCCAGGGGGGGGCCTACGAGCAGTACTTC	:::::::::0::12:12:::19:22::39:::	CD8
394	TGTGCCACCAGCCCCGACAGGGGGCCTTACGAGCAGTACTTC	TRBV15	TRBD1	TRBJ2-7	TRBV15*00	TRBJ2	CATSPDRGPYEQYF	TGTGCCACCAGCCCCGACAGGGGGCCTTACGAGCAGTACTTC	:::::::::0::12:15::25:25:27::42:::	CD8
395	TGTGCCACCAGCCCCTCAGCAGGGGGCTATGGCTACACCTTC	TRBV15	TRBD1	TRBJ1-2	TRBV15*00	TRBJ1	CATSPSAGGYGYTF	TGTGCCACCAGCCCCTCAGCAGGGGGCTATGGCTACACCTTC	:::::::::0::12:19:::26:26::42:::	CD8
396	TGTGCCACCAGCCGAGGACAGAGCGGCTACAATGAGCAGTTCTTC	TRBV15		TRBJ2-1	TRBV15*00	TRBJ2	CATSRGQSGYNEQFF	TGTGCCACCAGCCGAGGACAGAGCGGCTACAATGAGCAGTTCTTC	:::::::::0::16:::::20:23:45:::	CD8
397	TGTGCCACCAGCCGCGCAGGGGCCTACGAGCAGTACGTC	TRBV15	TRBD1	TRBJ2-7	TRBV15*00	TRBJ2	CATSRAGAYEQYV	TGTGCCACCAGCCGCGCAGGGGCCTACGAGCAGTACGTC	:::::::::0::12:16:::22:22::39:::	CD8
398	TGTGCCACCAGCCGCGGGGACGGTACCTACGAGCAGTACGTC	TRBV15	TRBD1	TRBJ2-7	TRBV15*00	TRBJ2	CATSRGDGTYEQYV	TGTGCCACCAGCCGCGGGGACGGTACCTACGAGCAGTACGTC	:::::::::0::12:16:16::21:25::42:::	CD8
399	TGTGCCACCAGCCGTGGTGTAGGGTTTTACGAGCAGTACGTC	TRBV15		TRBJ2-7	TRBV15*00	TRBJ2	CATSRGVGFYEQYV	TGTGCCACCAGCCGTGGTGTAGGGTTTTACGAGCAGTACGTC	:::::::::0::12:::::27::42:::	CD8
400	TGTGCCACCAGCGCCAGCACAGGGCTTGAGCAGTTCTTC	TRBV15	TRBD1	TRBJ2-1	TRBV15*00	TRBJ2	CATSASTGLEQFF	TGTGCCACCAGCGCCAGCACAGGGCTTGAGCAGTTCTTC	:::::::::0::12:18:::24:26::39:::	CD8
401	TGTGCCACCAGCGCCCAACAGGGAGCCGGGGAGCTGTTTTTT	TRBV15	TRBD1	TRBJ2-2	TRBV15*00	TRBJ2	CATSAQQGAGELFF	TGTGCCACCAGCGCCCAACAGGGAGCCGGGGAGCTGTTTTTT	:::::::::0::12:17:::23:25::42:::	CD8
402	TGTGCCACCAGCGCTGGGCCGGAGATGTACGAGCAGTACTTC	TRBV15	TRBD2	TRBJ2-7	TRBV15*00	TRBJ2	CATSAGPEMYEQYF	TGTGCCACCAGCGCTGGGCCGGAGATGTACGAGCAGTACTTC	:::::::::0::12:15::18:20:27::42:::	CD8
403	TGTGCCACCAGCGGACGGCCAGCCGACGAGCAGTACTTC	TRBV15		TRBJ2-7	TRBV15*00	TRBJ2	CATSGRPADEQYF	TGTGCCACCAGCGGACGGCCAGCCGACGAGCAGTACTTC	:::::::::0::15:::::22::39:::	CD8
404	TGTGCCACCAGCGGAGGGGGCGGGTACGAGCAGTACGTC	TRBV15	TRBD1	TRBJ2-7	TRBV15*00	TRBJ2	CATSGGGGYEQYV	TGTGCCACCAGCGGAGGGGGCGGGTACGAGCAGTACGTC	:::::::::0::16:16::21:22:24::39:::	CD8
405	TGTGCCACCAGCGGAGGGGTGGGTTACGAGCAGTACGTC	TRBV15		TRBJ2-7	TRBV15*00	TRBJ2	CATSGGVGYEQYV	TGTGCCACCAGCGGAGGGGTGGGTTACGAGCAGTACGTC	:::::::::0::16:::::24::39:::	CD8
406	TGTGCCACCAGCGGATCTACAGGTCAGCCCCAGCATTTT	TRBV15	TRBD1	TRBJ1-5	TRBV15*00	TRBJ1	CATSGSTGQPQHF	TGTGCCACCAGCGGATCTACAGGTCAGCCCCAGCATTTT	:::::::::0:15:18:18:::23:23::39:::	CD8
407	TGTGCCACCAGCGGGGCCACTGGGGGATATGAGCAGTTCTTC	TRBV15	TRBD1	TRBJ2-1	TRBV15*00	TRBJ2	CATSGATGGYEQFF	TGTGCCACCAGCGGGGCCACTGGGGGATATGAGCAGTTCTTC	:::::::::0::12:18:::26:28::42:::	CD8
408	TGTGCCACCAGCGGGTCCGGCAACTACGAGCAGTACTTC	TRBV15		TRBJ2-7	TRBV15*00	TRBJ2	CATSGSGNYEQYF	TGTGCCACCAGCGGGTCCGGCAACTACGAGCAGTACTTC	:::::::::0::12:::::23::39:::	CD8
409	TGTGCCACCAGCGTGACAGGGGGGAATTCACCCCTCCACTTT	TRBV15	TRBD1	TRBJ1-6	TRBV15*00	TRBJ1	CATSVTGGNSPLHF	TGTGCCACCAGCGTGACAGGGGGGAATTCACCCCTCCACTTT	:::::::::0::12:14:::23:24::42:::	CD8
410	TGTGCCACCAGCTCCCGGGCAATGCCTGCCCTAGATACGCAGTATTTT	TRBV15	TRBD1	TRBJ2-3	TRBV15*00	TRBJ2	CATSSRAMPALDTQYF	TGTGCCACCAGCTCCCGGGCAATGCCTGCCCTAGATACGCAGTATTTT	:::::::::0::12:12:16::19:32::48:::	CD8
411	TGTGCCACCAGTCCTGGTACGGCCTACGAGCAGTACTTC	TRBV15		TRBJ2-7	TRBV15*00	TRBJ2	CATSPGTAYEQYF	TGTGCCACCAGTCCTGGTACGGCCTACGAGCAGTACTTC	:::::::::0::11:::::22::39:::	CD8
412	TGTGCCACCAGTCGGGGAGCAGATACGCAGTATTTT	TRBV24-1	TRBD2	TRBJ2-3	TRBV24	TRBJ2	CATSRGADTQYF	TGTGCCACCAGTCGGGGAGCAGATACGCAGTATTTT	:::::::::0::12:14:::19:19::36:::	CD8
413	TGTGCCACCAGTGACAGCCAACTAGCGGGGGGCCACAATGAGCAGTTCTTC	TRBV24-1	TRBD2	TRBJ2-1	TRBV24	TRBJ2	CATSDSQLAGGHNEQFF	TGTGCCACCAGTGACAGCCAACTAGCGGGGGGCCACAATGAGCAGTTCTTC	:::::::::0::14:20::32:34:34::51:::	CD8
414	TGTGCCACCAGTGAGCCCGGGACAGCAGATACGCAGTATTTT	TRBV24-1	TRBD1	TRBJ2-3	TRBV24	TRBJ2	CATSEPGTADTQYF	TGTGCCACCAGTGAGCCCGGGACAGCAGATACGCAGTATTTT	:::::::::0::14:15:18::25:25::42:::	CD8
415	TGTGCCACCAGTGATCCGGGACAGGGTGAGAATGAGCAGTTCTTC	TRBV24-1	TRBD1	TRBJ2-1	TRBV24	TRBJ2	CATSDPGQGENEQFF	TGTGCCACCAGTGATCCGGGACAGGGTGAGAATGAGCAGTTCTTC	:::::::::0::15:15:17::26:30::45:::	CD4
416	TGTGCCACCAGTGATTTCACTAGCACAGATACGCAGTATTTT	TRBV24-1		TRBJ2-3	TRBV24	TRBJ2	CATSDFTSTDTQYF	TGTGCCACCAGTGATTTCACTAGCACAGATACGCAGTATTTT	:::::::::0::17:::::19:21:42:::	CD8
417	TGTGCCACCAGTGGCCCCGACGAGGCTTCACCCCTCCACTTT	TRBV24-1	TRBD1	TRBJ1-6	TRBV24	TRBJ1	CATSGPDEASPLHF	TGTGCCACCAGTGGCCCCGACGAGGCTTCACCCCTCCACTTT	:::::::::0::13:13:::18:26::42:::	CD8
418	TGTGCCACCAGTTATGAGAGGAACACTGAAGCTTTCTTT	TRBV15		TRBJ1-1	TRBV15*00	TRBJ1	CATSYERNTEAFF	TGTGCCACCAGTTATGAGAGGAACACTGAAGCTTTCTTT	:::::::::0::11:::::20::39:::	CD8
419	TGTGCCACCAGTTCCGGGGGGGCCCCCTACAATGAGCAGTTCTTC	TRBV15	TRBD2	TRBJ2-1	TRBV15*00	TRBJ2	CATSSGGAPYNEQFF	TGTGCCACCAGTTCCGGGGGGGCCCCCTACAATGAGCAGTTCTTC	:::::::::0::11:14::22:25:25::45:::	CD8
420	TGTGCCACCCAGGGGGCAGCCGGGGAGCTGTTTTTT	TRBV19	TRBD1	TRBJ2-2	TRBV19*00	TRBJ2	CATQGAAGELFF	TGTGCCACCCAGGGGGCAGCCGGGGAGCTGTTTTTT	:::::::::0::7:9::17:17:19::36:::	CD8
421	TGTGCCACCCCGACCGATACGCAGTATTTT	TRBV2		TRBJ2-3	TRBV2*00	TRBJ2	CATPTDTQYF	TGTGCCACCCCGACCGATACGCAGTATTTT	:::::::::0::7:::::12::30:::	CD8
422	TGTGCCACCCTAGCGGGGGGCAGCTACGAGCAGTACTTC	TRBV28	TRBD2	TRBJ2-7	TRBV28*00	TRBJ2	CATLAGGSYEQYF	TGTGCCACCCTAGCGGGGGGCAGCTACGAGCAGTACTTC	:::::::::0::7:9::20:21:23::39:::	CD8
423	TGTGCCACCGACCCGTGGAACACCGGGGAGCTGTTTTTT	TRBV24-1		TRBJ2-2	TRBV24	TRBJ2	CATDPWNTGELFF	TGTGCCACCGACCCGTGGAACACCGGGGAGCTGTTTTTT	:::::::::0::9:::::17::39:::	CD4
424	TGTGCCACCGCCCCGGGACAGGGTGTTTTTCATGAGCAGTTCTTC	TRBV24-1	TRBD1	TRBJ2-1	TRBV24	TRBJ2	CATAPGQGVFHEQFF	TGTGCCACCGCCCCGGGACAGGGTGTTTTTCATGAGCAGTTCTTC	:::::::::0::9:11:14::23:31::45:::	CD8
425	TGTGCCACCGCGATGGGGGCGGCTAACAATGAGCAGTTCTTC	TRBV9	TRBD1	TRBJ2-1	TRBV9*00	TRBJ2	CATAMGAANNEQFF	TGTGCCACCGCGATGGGGGCGGCTAACAATGAGCAGTTCTTC	:::::::::0::7:14::20:21:25::42:::	CD8
426	TGTGCCACCGGAGTCAGTGCGAAACCAGATACGCAGTATTTT	TRBV6-1		TRBJ2-3	TRBV6	TRBJ2	CATGVSAKPDTQYF	TGTGCCACCGGAGTCAGTGCGAAACCAGATACGCAGTATTTT	:::::::::0::7:::::25::42:::	CD8
427	TGTGCCACCTCAGGGGCGGGTAATCAGCCCCAGCATTTT	TRBV24-1	TRBD1	TRBJ1-5	TRBV24	TRBJ1	CATSGAGNQPQHF	TGTGCCACCTCAGGGGCGGGTAATCAGCCCCAGCATTTT	:::::::::0::9:10:::16:21::39:::	CD4
428	TGTGCCACCTCAGGGGGTGGCAATCAGCCCCAGCATTTT	TRBV24-1	TRBD1	TRBJ1-5	TRBV24	TRBJ1	CATSGGGNQPQHF	TGTGCCACCTCAGGGGGTGGCAATCAGCCCCAGCATTTT	:::::::::0::9:10:::17:19::39:::	CD4
429	TGTGCCACCTCTGGGGCCGCGTCCTACGAGCAGTACTTC	TRBV15	TRBD1	TRBJ2-7	TRBV15*00	TRBJ2	CATSGAASYEQYF	TGTGCCACCTCTGGGGCCGCGTCCTACGAGCAGTACTTC	:::::::::0::9:12::18:20:21::39:::	CD8
430	TGTGCCACCTTCCCGCCGGAGTCTATCACAGATACGCAGTATTTT	TRBV24-1	TRBD2	TRBJ2-3	TRBV24	TRBJ2	CATFPPESITDTQYF	TGTGCCACCTTCCCGCCGGAGTCTATCACAGATACGCAGTATTTT	:::::::::0::9:10:::16:22:24:45:::	CD4
431	TGTGCCACGAGCGCCTCTACAGCCGATGAGCAGTTCTTC	TRBV15		TRBJ2-1	TRBV15*00	TRBJ2	CATSASTADEQFF	TGTGCCACGAGCGCCTCTACAGCCGATGAGCAGTTCTTC	:::::::::0::12:::::25::39:::	CD8
432	TGTGCCACTGGGATGTGGGGGAATGAGCAGTTCTTC	TRBV7-8	TRBD1	TRBJ2-1	TRBV7	TRBJ2	CATGMWGNEQFF	TGTGCCACTGGGATGTGGGGGAATGAGCAGTTCTTC	:::::::::0::7:16:::21:21::36:::	CD8
433	TGTGCCACTTGCCCGGCAGCCAATCAGCCCCAGCATTTT	TRBV6-1	TRBD1	TRBJ1-5	TRBV6	TRBJ1	CATCPAANQPQHF	TGTGCCACTTGCCCGGCAGCCAATCAGCCCCAGCATTTT	:::::::::0::7:11:14::16:20::39:::	CD8
434	TGTGCCAGACAGCCTAACTATGGCTACACCTTC	TRBV2		TRBJ1-2	TRBV2*00	TRBJ1	CARQPNYGYTF	TGTGCCAGACAGCCTAACTATGGCTACACCTTC	:::::::::0::12:::::13:13:33:::	CD8
435	TGTGCCAGAGTCGTCGGGAATACAGGGCCCCCCTTTGCAACTAATGAAAAACTGTTTTTT	TRBV7-6	TRBD1	TRBJ1-4	TRBV7	TRBJ1	CARVVGNTGPPFATNEKLFF	TGTGCCAGAGTCGTCGGGAATACAGGGCCCCCCTTTGCAACTAATGAAAAACTGTTTTTT	:::::::::0::8:24::28:34:34:37:60:::	CD8
436	TGTGCCAGCAAAACAGGGGCTTCACCCCTCCACTTT	TRBV7-2	TRBD1	TRBJ1-6	TRBV7	TRBJ1	CASKTGASPLHF	TGTGCCAGCAAAACAGGGGCTTCACCCCTCCACTTT	:::::::::0::10:12:::19:20::36:::	CD4
437	TGTGCCAGCAAAATCGGGGGGGCGGCAGATACGCAGTATTTT	TRBV7-3	TRBD1	TRBJ2-3	TRBV7	TRBJ2	CASKIGGAADTQYF	TGTGCCAGCAAAATCGGGGGGGCGGCAGATACGCAGTATTTT	:::::::::0::10:17::23:24:25::42:::	CD4
438	TGTGCCAGCAAAGGACAGGGGGCGCTTAATGAGCAGTTCTTC	TRBV7-2	TRBD1	TRBJ2-1	TRBV7	TRBJ2	CASKGQGALNEQFF	TGTGCCAGCAAAGGACAGGGGGCGCTTAATGAGCAGTTCTTC	:::::::::0::10:12::23:25:27::42:::	CD4
439	TGTGCCAGCAAAGGACTAGCGGGGGCCCAAAGCTCCTACAATGAGCAGTTCTTC	TRBV11-2	TRBD2	TRBJ2-1	TRBV11	TRBJ2	CASKGLAGAQSSYNEQFF	TGTGCCAGCAAAGGACTAGCGGGGGCCCAAAGCTCCTACAATGAGCAGTTCTTC	:::::::::0::10:12::25:28:30:32:54:::	CD4
440	TGTGCCAGCAAAGTTATGGGGGCGGAGGATACGCAGTATTTT	TRBV7-2	TRBD1	TRBJ2-3	TRBV7	TRBJ2	CASKVMGAEDTQYF	TGTGCCAGCAAAGTTATGGGGGCGGAGGATACGCAGTATTTT	:::::::::0::10:17::23:24:27::42:::	CD4
441	TGTGCCAGCAACCAAGCGGGGGGAGTGGCAGAGACCCAGTACTTC	TRBV7-9	TRBD2	TRBJ2-5	TRBV7	TRBJ2	CASNQAGGVAETQYF	TGTGCCAGCAACCAAGCGGGGGGAGTGGCAGAGACCCAGTACTTC	:::::::::0::10:14::23:23:29::45:::	CD8
442	TGTGCCAGCAACCCCCCAGGCTACAATGAGCAGTTCTTC	TRBV7-9	TRBD1	TRBJ2-1	TRBV7	TRBJ2	CASNPPGYNEQFF	TGTGCCAGCAACCCCCCAGGCTACAATGAGCAGTTCTTC	:::::::::0::10:11:::16:20::39:::	CD8
443	TGTGCCAGCAACCCCGCGGGGGGCGAGACCCAGTACTTC	TRBV6-1	TRBD2	TRBJ2-5	TRBV6	TRBJ2	CASNPAGGETQYF	TGTGCCAGCAACCCCGCGGGGGGCGAGACCCAGTACTTC	:::::::::0::10:15::23:24:24::39:::	CD8
444	TGTGCCAGCAACCGCGGGGGGGCAAATGAGCAGTTCTTC	TRBV2	TRBD2	TRBJ2-1	TRBV2*00	TRBJ2	CASNRGGANEQFF	TGTGCCAGCAACCGCGGGGGGGCAAATGAGCAGTTCTTC	:::::::::0::10:13::22:23:24::39:::	CD8
445	TGTGCCAGCAACCTCCTCTCAGGGGGGATGAGAGATACGCAGTATTTT	TRBV12-3	TRBD1	TRBJ2-3	TRBV12	TRBJ2	CASNLLSGGMRDTQYF	TGTGCCAGCAACCTCCTCTCAGGGGGGATGAGAGATACGCAGTATTTT	:::::::::0::10:19:::26:32::48:::	CD8
446	TGTGCCAGCAACGGGATACACACCGGGGAGCTGTTTTTT	TRBV12-4	TRBD1	TRBJ2-2	TRBV12	TRBJ2	CASNGIHTGELFF	TGTGCCAGCAACGGGATACACACCGGGGAGCTGTTTTTT	:::::::::0::10:11:12::16:19::39:::	CD8
447	TGTGCCAGCAACTACCGACCCGGACAAGAGACCCAGTACTTC	TRBV7-4	TRBD1	TRBJ2-5	TRBV7	TRBJ2	CASNYRPGQETQYF	TGTGCCAGCAACTACCGACCCGGACAAGAGACCCAGTACTTC	:::::::::0::13:18:21::23:24::42:::	CD8
448	TGTGCCAGCAAGACAGGGGGGTTCGGGGAGCTGTTTTTT	TRBV12-3	TRBD1	TRBJ2-2	TRBV12	TRBJ2	CASKTGGFGELFF	TGTGCCAGCAAGACAGGGGGGTTCGGGGAGCTGTTTTTT	:::::::::0::10:11:::20:23::39:::	CD8
449	TGTGCCAGCAAGCCGGGACAGGACTACACCGGGGAGCTGTTTTTT	TRBV6-1	TRBD1	TRBJ2-2	TRBV6	TRBJ2	CASKPGQDYTGELFF	TGTGCCAGCAAGCCGGGACAGGACTACACCGGGGAGCTGTTTTTT	:::::::::0::10:12:14::22:25::45:::	CD8
450	TGTGCCAGCAAGGCCGGAAGGCTAGGAAACACCATATATTTT	TRBV12-3		TRBJ1-3	TRBV12	TRBJ1	CASKAGRLGNTIYF	TGTGCCAGCAAGGCCGGAAGGCTAGGAAACACCATATATTTT	:::::::::0::10:::::24::42:::	CD4
451	TGTGCCAGCAATACACAGGGGGGACCTGAAGCTTTCTTT	TRBV5-4	TRBD1	TRBJ1-1	TRBV5	TRBJ1	CASNTQGGPEAFF	TGTGCCAGCAATACACAGGGGGGACCTGAAGCTTTCTTT	:::::::::0::10:14:::22:25::39:::	CD8
452	TGTGCCAGCAATGCAGGGGCCGGGAACGAGCAGTACTTC	TRBV6-1	TRBD1	TRBJ2-7	TRBV6	TRBJ2	CASNAGAGNEQYF	TGTGCCAGCAATGCAGGGGCCGGGAACGAGCAGTACTTC	:::::::::0::16:19:21::25:25::39:::	CD8
453	TGTGCCAGCAATGGAGCGGGGGGATACGAGCAGTACTTC	TRBV9	TRBD2	TRBJ2-7	TRBV9*00	TRBJ2	CASNGAGGYEQYF	TGTGCCAGCAATGGAGCGGGGGGATACGAGCAGTACTTC	:::::::::0::10:14::23:23:24::39:::	CD8
454	TGTGCCAGCACACAGGGACCAGAGACCGGGGAGCTGTTTTTT	TRBV7-6	TRBD1	TRBJ2-2	TRBV7	TRBJ2	CASTQGPETGELFF	TGTGCCAGCACACAGGGACCAGAGACCGGGGAGCTGTTTTTT	:::::::::0::10:11:::17:24::42:::	CD8
455	TGTGCCAGCACAGGACAGGGGGCCTACGAGCAGTACTTC	TRBV6-2	TRBD1	TRBJ2-7	TRBV6	TRBJ2	CASTGQGAYEQYF	TGTGCCAGCACAGGACAGGGGGCCTACGAGCAGTACTTC	:::::::::0::10:12:::22:22::39:::	CD8
456	TGTGCCAGCACCAAGAACTTGTGCAGGGGGACGAGCAGTACGTC	TRBV21-1	TRBD1	TRBJ2-7	TRBV21	TRBJ2	CASTKNL_QGDEQYV	TGTGCCAGCACCAAGAACTTGTGCAGGGGGACGAGCAGTACGTC	:::::::::0::14:23:::30:30::44:::	CD8
457	TGTGCCAGCACCAGCACCGGGACAGGGGCCTATGGCTACACCTTC	TRBV2	TRBD1	TRBJ1-2	TRBV2*00	TRBJ1	CASTSTGTGAYGYTF	TGTGCCAGCACCAGCACCGGGACAGGGGCCTATGGCTACACCTTC	:::::::::0::10:16:18::28:29::45:::	CD8
458	TGTGCCAGCACCCAAGGGGGGGCCCCCTACAATGAGCAGTTCTTC	TRBV7-3	TRBD1	TRBJ2-1	TRBV7	TRBJ2	CASTQGGAPYNEQFF	TGTGCCAGCACCCAAGGGGGGGCCCCCTACAATGAGCAGTTCTTC	:::::::::0::10:14::21:25:25::45:::	CD8
459	TGTGCCAGCACCCAGACCGGGGACACCATATATTTT	TRBV28	TRBD1	TRBJ1-3	TRBV28*00	TRBJ1	CASTQTGDTIYF	TGTGCCAGCACCCAGACCGGGGACACCATATATTTT	:::::::::0::10:14:::22:22::36:::	CD8
460	TGTGCCAGCACCCAGGGGAACAGCAACATGAACACTGAAGCTTTCTTT	TRBV5-4	TRBD1	TRBJ1-1	TRBV5	TRBJ1	CASTQGNSNMNTEAFF	TGTGCCAGCACCCAGGGGAACAGCAACATGAACACTGAAGCTTTCTTT	:::::::::0::10:12:::18:26:28:48:::	CD4
461	TGTGCCAGCACCCCCGGGACAGAAAGCTACGAGCAGTACTTC	TRBV6-2	TRBD1	TRBJ2-7	TRBV6	TRBJ2	CASTPGTESYEQYF	TGTGCCAGCACCCCCGGGACAGAAAGCTACGAGCAGTACTTC	:::::::::0::10:12:15::22:26::42:::	CD8
462	TGTGCCAGCACCCCCTTTGGGACGGAAGAGACCCAGTACTTC	TRBV12-4	TRBD1	TRBJ2-5	TRBV12	TRBJ2	CASTPFGTEETQYF	TGTGCCAGCACCCCCTTTGGGACGGAAGAGACCCAGTACTTC	:::::::::0::10:10:::16:25::42:::	CD4
463	TGTGCCAGCACCCCGGCCCCTAACACTGAAGCTTTCTTT	TRBV2	TRBD1	TRBJ1-1	TRBV2*00	TRBJ1	CASTPAPNTEAFF	TGTGCCAGCACCCCGGCCCCTAACACTGAAGCTTTCTTT	:::::::::0::10:13::14:21:21::39:::	CD8
464	TGTGCCAGCACCCCGGGACAGGGGTTCTATGAGCAGTTCTTC	TRBV2	TRBD1	TRBJ2-1	TRBV2*00	TRBJ2	CASTPGQGFYEQFF	TGTGCCAGCACCCCGGGACAGGGGTTCTATGAGCAGTTCTTC	:::::::::0::10:11:14::24:28::42:::	CD8
465	TGTGCCAGCACCCCGGGGCTGGAAAATTCACCCCTCCACTTT	TRBV9	TRBD2	TRBJ1-6	TRBV9*00	TRBJ1	CASTPGLENSPLHF	TGTGCCAGCACCCCGGGGCTGGAAAATTCACCCCTCCACTTT	:::::::::0::10:11:14::20:24::42:::	CD4
466	TGTGCCAGCACCCCGGGGGGCGGTCAGCCCCAGCATTTT	TRBV27	TRBD1	TRBJ1-5	TRBV27*00	TRBJ1	CASTPGGGQPQHF	TGTGCCAGCACCCCGGGGGGCGGTCAGCCCCAGCATTTT	:::::::::0::10:15::21:22:23::39:::	CD8
467	TGTGCCAGCACCCGAGGAGGGTCAGGAATGAACACTGAAGCTTTCTTT	TRBV6-2	TRBD2	TRBJ1-1	TRBV6	TRBJ1	CASTRGGSGMNTEAFF	TGTGCCAGCACCCGAGGAGGGTCAGGAATGAACACTGAAGCTTTCTTT	:::::::::0::10:15::21:21:27:28:48:::	CD8
468	TGTGCCAGCACCCGTCTCCCCGGTTTGGAGCAGTTCTTC	TRBV5-5	TRBD1	TRBJ2-1	TRBV5	TRBJ2	CASTRLPGLEQFF	TGTGCCAGCACCCGTCTCCCCGGTTTGGAGCAGTTCTTC	:::::::::0::10:18:21::23:27::39:::	CD8
469	TGTGCCAGCACCCTCGGCGCGGGAGGCACCTACGAGCAGTACTTC	TRBV27	TRBD1	TRBJ2-7	TRBV27*00	TRBJ2	CASTLGAGGTYEQYF	TGTGCCAGCACCCTCGGCGCGGGAGGCACCTACGAGCAGTACTTC	:::::::::0::10:15::18:20:21:26:45:::	CD8
470	TGTGCCAGCACCGACAGGGGGTACGAGCAGTACTTC	TRBV5-6	TRBD1	TRBJ2-7	TRBV5	TRBJ2	CASTDRGYEQYF	TGTGCCAGCACCGACAGGGGGTACGAGCAGTACTTC	:::::::::0::10:12:::21:21::36:::	CD8
471	TGTGCCAGCACCGCCGGAGAAACTCATAGCAATCAGCCCCAGCATTTT	TRBV27		TRBJ1-5	TRBV27*00	TRBJ1	CASTAGETHSNQPQHF	TGTGCCAGCACCGCCGGAGAAACTCATAGCAATCAGCCCCAGCATTTT	:::::::::0::10:::::25:26:48:::	CD4
472	TGTGCCAGCACCGTGGAGGGCGGTTACAATGAGCAGTTCTTC	TRBV5-4	TRBD1	TRBJ2-1	TRBV5	TRBJ2	CASTVEGGYNEQFF	TGTGCCAGCACCGTGGAGGGCGGTTACAATGAGCAGTTCTTC	:::::::::0:16:16:17::21:22:24::42:::	CD8
473	TGTGCCAGCACCTCCGGACAGGGAGTCTACGAGCAGTACGTC	TRBV2	TRBD1	TRBJ2-7	TRBV2*00	TRBJ2	CASTSGQGVYEQYV	TGTGCCAGCACCTCCGGACAGGGAGTCTACGAGCAGTACGTC	:::::::::0::10:15:::21:21:25:42:::	CD8
474	TGTGCCAGCACCTGGGAGGGGGAGCTGTTTTTT	TRBV12-4	TRBD2	TRBJ2-2	TRBV12	TRBJ2	CASTWEGELFF	TGTGCCAGCACCTGGGAGGGGGAGCTGTTTTTT	:::::::::0::10:13:::18:18::33:::	CD8
475	TGTGCCAGCACCTTCCTCGGGACAGTCGGAGGGACCCAGTACTTC	TRBV28	TRBD1	TRBJ2-5	TRBV28*00	TRBJ2	CASTFLGTVGGTQYF	TGTGCCAGCACCTTCCTCGGGACAGTCGGAGGGACCCAGTACTTC	:::::::::0::10:10:18::25:29::45:::	CD4
476	TGTGCCAGCACCTTCGGACAGGGGGGTTCCTACAATGAGCAGTTCTTC	TRBV9	TRBD1	TRBJ2-1	TRBV9*00	TRBJ2	CASTFGQGGSYNEQFF	TGTGCCAGCACCTTCGGACAGGGGGGTTCCTACAATGAGCAGTTCTTC	:::::::::0::10:15:::25:27::48:::	CD4
477	TGTGCCAGCACCTTCGGGCAGGGGACGAGCTCCTACGAGCAGTACTTC	TRBV2	TRBD1	TRBJ2-7	TRBV2*00	TRBJ2	CASTFGQGTSSYEQYF	TGTGCCAGCACCTTCGGGCAGGGGACGAGCTCCTACGAGCAGTACTTC	:::::::::0::10:14:15::24:26:29:48:::	CD4
478	TGTGCCAGCACCTTGGAAGGGTCACCCCTCCACTTT	TRBV9		TRBJ1-6	TRBV9*00	TRBJ1	CASTLEGSPLHF	TGTGCCAGCACCTTGGAAGGGTCACCCCTCCACTTT	:::::::::0::10:::::21::36:::	CD4
479	TGTGCCAGCACGACAGGGCTTACCTACAATGAGCAGTTCTTC	TRBV9	TRBD1	TRBJ2-1	TRBV9*00	TRBJ2	CASTTGLTYNEQFF	TGTGCCAGCACGACAGGGCTTACCTACAATGAGCAGTTCTTC	:::::::::0::10:11:::18:22::42:::	CD8
480	TGTGCCAGCACGCTCCGGGGATCCGGGGCCAACGTCCTGACTTTC	TRBV12-3	TRBD1	TRBJ2-6	TRBV12	TRBJ2	CASTLRGSGANVLTF	TGTGCCAGCACGCTCCGGGGATCCGGGGCCAACGTCCTGACTTTC	:::::::::0::10:13:17::21:21::45:::	CD4
481	TGTGCCAGCACGGACGGGGCCCTTAATTCACCCCTCCACTTT	TRBV12-4	TRBD1	TRBJ1-6	TRBV12	TRBJ1	CASTDGALNSPLHF	TGTGCCAGCACGGACGGGGCCCTTAATTCACCCCTCCACTTT	:::::::::0::10:11:::19:20::42:::	CD8
482	TGTGCCAGCACGGTGGGAGGGGTGGCATACAATGAGCAGTTCTTC	TRBV9	TRBD2	TRBJ2-1	TRBV9*00	TRBJ2	CASTVGGVAYNEQFF	TGTGCCAGCACGGTGGGAGGGGTGGCATACAATGAGCAGTTCTTC	:::::::::0::10:14::21:21:27::45:::	CD8
483	TGTGCCAGCACTGAGCGGGGGGGCTCCTACAATGAGCAGTTCTTC	TRBV13	TRBD2	TRBJ2-1	TRBV13*00	TRBJ2	CASTERGGSYNEQFF	TGTGCCAGCACTGAGCGGGGGGGCTCCTACAATGAGCAGTTCTTC	:::::::::0::10:13:::19:19:23:45:::	CD8
484	TGTGCCAGCAGAAAGACTAGCGGGGGATGGATGGAGCAGTACGTC	TRBV5-6	TRBD2	TRBJ2-7	TRBV5	TRBJ2	CASRKTSGGWMEQYV	TGTGCCAGCAGAAAGACTAGCGGGGGATGGATGGAGCAGTACGTC	:::::::::0::11:14:::24:33::45:::	CD8
485	TGTGCCAGCAGAAATATGAACACTGAAGCTTTCTTT	TRBV11-2		TRBJ1-1	TRBV11	TRBJ1	CASRNMNTEAFF	TGTGCCAGCAGAAATATGAACACTGAAGCTTTCTTT	:::::::::0::11:::::15:16:36:::	CD4
486	TGTGCCAGCAGAAATGGCAGGAGCTCCTACAATGAGCAGTTCTTC	TRBV4-2		TRBJ2-1	TRBV4	TRBJ2	CASRNGRSSYNEQFF	TGTGCCAGCAGAAATGGCAGGAGCTCCTACAATGAGCAGTTCTTC	:::::::::0::11:::::18:23:45:::	CD4
487	TGTGCCAGCAGAAGACAGGGGGCACCTAATGAAAAACTGTTTTTT	TRBV12-4	TRBD1	TRBJ1-4	TRBV12	TRBJ1	CASRRQGAPNEKLFF	TGTGCCAGCAGAAGACAGGGGGCACCTAATGAAAAACTGTTTTTT	:::::::::0::11:13:::21:21:22:45:::	CD8
488	TGTGCCAGCAGACAACAGGATTCACCCCTCCACTTT	TRBV7-9	TRBD1	TRBJ1-6	TRBV7	TRBJ1	CASRQQDSPLHF	TGTGCCAGCAGACAACAGGATTCACCCCTCCACTTT	:::::::::0::11:14:::19:19::36:::	CD4
489	TGTGCCAGCAGACACACTATACGAGGGGAGACCCAGTACTTC	TRBV12-4	TRBD2	TRBJ2-5	TRBV12	TRBJ2	CASRHTIRGETQYF	TGTGCCAGCAGACACACTATACGAGGGGAGACCCAGTACTTC	:::::::::0::11:22::27:27:27::42:::	CD4
490	TGTGCCAGCAGACCACAACAGGGGAAGGGGTCCTACGAGCAGTACTTC	TRBV14	TRBD1	TRBJ2-7	TRBV14*00	TRBJ2	CASRPQQGKGSYEQYF	TGTGCCAGCAGACCACAACAGGGGAAGGGGTCCTACGAGCAGTACTTC	:::::::::0::15:17:::24:30::48:::	CD8
491	TGTGCCAGCAGACCCCATGGCGGGGGGACCCCAGGTGAGCAGTTCTTC	TRBV12-4	TRBD2	TRBJ2-1	TRBV12	TRBJ2	CASRPHGGGTPGEQFF	TGTGCCAGCAGACCCCATGGCGGGGGGACCCCAGGTGAGCAGTTCTTC	:::::::::0::11:19::28:31:35::48:::	CD4
492	TGTGCCAGCAGACCCGGGACAGCGACCTACGAGCAGTACTTC	TRBV12-3	TRBD1	TRBJ2-7	TRBV12	TRBJ2	CASRPGTATYEQYF	TGTGCCAGCAGACCCGGGACAGCGACCTACGAGCAGTACTTC	:::::::::0::11:12:15::22:25::42:::	CD4
493	TGTGCCAGCAGACCGGGATCTATTGATTCACCCCTCCACTTT	TRBV2	TRBD2	TRBJ1-6	TRBV2*00	TRBJ1	CASRPGSIDSPLHF	TGTGCCAGCAGACCGGGATCTATTGATTCACCCCTCCACTTT	:::::::::0::11:12:14::22:25::42:::	CD4
494	TGTGCCAGCAGAGCAGGGGCCACAGATACGCAGTATTTT	TRBV6-1	TRBD1	TRBJ2-3	TRBV6	TRBJ2	CASRAGATDTQYF	TGTGCCAGCAGAGCAGGGGCCACAGATACGCAGTATTTT	:::::::::0::11:13:::19:20::39:::	CD8
495	TGTGCCAGCAGAGCCACCCGTAACTATGGCTACACCTTC	TRBV6-1		TRBJ1-2	TRBV6	TRBJ1	CASRATRNYGYTF	TGTGCCAGCAGAGCCACCCGTAACTATGGCTACACCTTC	:::::::::0::11:::::20::39:::	CD4
496	TGTGCCAGCAGAGGGACTAGCGGCTACAATGAGCAGTTCTTC	TRBV7-2	TRBD2	TRBJ2-1	TRBV7	TRBJ2	CASRGTSGYNEQFF	TGTGCCAGCAGAGGGACTAGCGGCTACAATGAGCAGTTCTTC	:::::::::0::11:12:12::23:23::42:::	CD8
497	TGTGCCAGCAGATACGGGACAGTCAACACCGGGGAGCTGTTTTTT	TRBV12-4	TRBD1	TRBJ2-2	TRBV12	TRBJ2	CASRYGTVNTGELFF	TGTGCCAGCAGATACGGGACAGTCAACACCGGGGAGCTGTTTTTT	:::::::::0::11:14:15::22:24::45:::	CD4
498	TGTGCCAGCAGATCCGGGGGCCGGGGAGAGACCCAGTACTTC	TRBV12-3	TRBD1	TRBJ2-5	TRBV12	TRBJ2	CASRSGGRGETQYF	TGTGCCAGCAGATCCGGGGGCCGGGGAGAGACCCAGTACTTC	:::::::::0::11:15::21:21:26::42:::	CD8
499	TGTGCCAGCAGATCTGAATCCGGGGGTGGTCAGCCCCAGCATTTT	TRBV5-5	TRBD1	TRBJ1-5	TRBV5	TRBJ1	CASRSESGGGQPQHF	TGTGCCAGCAGATCTGAATCCGGGGGTGGTCAGCCCCAGCATTTT	:::::::::0::11:19:21::24:29::45:::	CD8
500	TGTGCCAGCAGATTTGGACAGGGGAGAGAAAACATTCAGTACTTC	TRBV12-4	TRBD1	TRBJ2-4	TRBV12	TRBJ2	CASRFGQGRENIQYF	TGTGCCAGCAGATTTGGACAGGGGAGAGAAAACATTCAGTACTTC	:::::::::0::15:15:::24:28::45:::	CD4
501	TGTGCCAGCAGCAAACAGGGCGAGAACACTGAAGCTTTCTTT	TRBV2	TRBD1	TRBJ1-1	TRBV2*00	TRBJ1	CASSKQGENTEAFF	TGTGCCAGCAGCAAACAGGGCGAGAACACTGAAGCTTTCTTT	:::::::::0::11:14:::20:23::42:::	CD4
502	TGTGCCAGCAGCAAACAGGGGGAGAACACTGAAGCTTTCTTT	TRBV2	TRBD1	TRBJ1-1	TRBV2*00	TRBJ1	CASSKQGENTEAFF	TGTGCCAGCAGCAAACAGGGGGAGAACACTGAAGCTTTCTTT	:::::::::0::11:14:::22:23::42:::	CD4
503	TGTGCCAGCAGCAAAGCCGACAGGAACAAAAACATTCAGTACTTC	TRBV21-1	TRBD1	TRBJ2-4	TRBV21	TRBJ2	CASSKADRNKNIQYF	TGTGCCAGCAGCAAAGCCGACAGGAACAAAAACATTCAGTACTTC	:::::::::0:17:17:18:::24:26::45:::	CD4
504	TGTGCCAGCAGCAAAGGACAGGCCTACGAGCAGTACTTC	TRBV13	TRBD1	TRBJ2-7	TRBV13*00	TRBJ2	CASSKGQAYEQYF	TGTGCCAGCAGCAAAGGACAGGCCTACGAGCAGTACTTC	:::::::::0::12:15:::22:22::39:::	CD8
505	TGTGCCAGCAGCAACCCCGAGGAAGAGACCCAGTACTTC	TRBV7-9		TRBJ2-5	TRBV7	TRBJ2	CASSNPEEETQYF	TGTGCCAGCAGCAACCCCGAGGAAGAGACCCAGTACTTC	:::::::::0::12:::::22::39:::	CD8
506	TGTGCCAGCAGCAATTCGTTAGACAGGGGCTATAATTCACCCCTCCACTTT	TRBV6-1	TRBD1	TRBJ1-6	TRBV6	TRBJ1	CASSNSLDRGYNSPLHF	TGTGCCAGCAGCAATTCGTTAGACAGGGGCTATAATTCACCCCTCCACTTT	:::::::::0::11:21:::29:29::51:::	CD4
507	TGTGCCAGCAGCACACAACAGCCCCTTGGTGTCGGGGAGCTGTTTTTT	TRBV5-4	TRBD1	TRBJ2-2	TRBV5	TRBJ2	CASSTQQPLGVGELFF	TGTGCCAGCAGCACACAACAGCCCCTTGGTGTCGGGGAGCTGTTTTTT	:::::::::0::12:20:::28:32::48:::	CD8
508	TGTGCCAGCAGCACCAGACTAGCGGGGGGCACAGATACGCAGTATTTT	TRBV7-6	TRBD2	TRBJ2-3	TRBV7	TRBJ2	CASSTRLAGGTDTQYF	TGTGCCAGCAGCACCAGACTAGCGGGGGGCACAGATACGCAGTATTTT	:::::::::0::12:16:::26:28::48:::	CD4
509	TGTGCCAGCAGCACCCGGGACAGGCTGAACACTGAAGCTTTCTTT	TRBV9	TRBD1	TRBJ1-1	TRBV9*00	TRBJ1	CASSTRDRLNTEAFF	TGTGCCAGCAGCACCCGGGACAGGCTGAACACTGAAGCTTTCTTT	:::::::::0::12:13:16::24:25:25:45:::	CD8
510	TGTGCCAGCAGCACCGCCCAGAGGGGGGTTGAAGCTTTCTTT	TRBV3-1	TRBD1	TRBJ1-1	TRBV3	TRBJ1	CASSTAQRGVEAFF	TGTGCCAGCAGCACCGCCCAGAGGGGGGTTGAAGCTTTCTTT	:::::::::0::12:21:::27:29::42:::	CD8
511	TGTGCCAGCAGCACCGGGGGGGTGCCGTACAATGAGCAGTTCTTC	TRBV9	TRBD1	TRBJ2-1	TRBV9*00	TRBJ2	CASSTGGVPYNEQFF	TGTGCCAGCAGCACCGGGGGGGTGCCGTACAATGAGCAGTTCTTC	:::::::::0::12:17::23:26:27::45:::	CD8
512	TGTGCCAGCAGCACTCAGGCTTACGAGCAGTACGTC	TRBV5-8		TRBJ2-7	TRBV5	TRBJ2	CASSTQAYEQYV	TGTGCCAGCAGCACTCAGGCTTACGAGCAGTACGTC	:::::::::0::12:::::21::36:::	CD4
513	TGTGCCAGCAGCAGAGGGACAGGGGCCTACGAGCAGTACTTC	TRBV9	TRBD1	TRBJ2-7	TRBV9*00	TRBJ2	CASSRGTGAYEQYF	TGTGCCAGCAGCAGAGGGACAGGGGCCTACGAGCAGTACTTC	:::::::::0::12:15:15::25:25::42:::	CD8
514	TGTGCCAGCAGCAGAGGGGAGGGGGCTTCCTACAATGAGCAGTTCTTC	TRBV9	TRBD1	TRBJ2-1	TRBV9*00	TRBJ2	CASSRGEGASYNEQFF	TGTGCCAGCAGCAGAGGGGAGGGGGCTTCCTACAATGAGCAGTTCTTC	:::::::::0::12:19::26:26:27::48:::	CD8
515	TGTGCCAGCAGCAGCAGCGGGGGGGCACCGGTCGTAGGGTTCTTC	TRBV6-2	TRBD2	TRBJ2-1	TRBV6	TRBJ2	CASSSSGGAPVVGFF	TGTGCCAGCAGCAGCAGCGGGGGGGCACCGGTCGTAGGGTTCTTC	:::::::::0::11:15::25:26:38::45:::	CD8
516	TGTGCCAGCAGCAGGGGTGGGGACAGGACGCACGAGCAGTACTTC	TRBV9	TRBD1	TRBJ2-7	TRBV9*00	TRBJ2	CASSRGGDRTHEQYF	TGTGCCAGCAGCAGGGGTGGGGACAGGACGCACGAGCAGTACTTC	:::::::::0::12:19:19::27:31::45:::	CD8
517	TGTGCCAGCAGCATACAGGGAACCGGGGAGCTGTTTTTT	TRBV7-3	TRBD1	TRBJ2-2	TRBV7	TRBJ2	CASSIQGTGELFF	TGTGCCAGCAGCATACAGGGAACCGGGGAGCTGTTTTTT	:::::::::0::15:15:::20:21::39:::	CD4
518	TGTGCCAGCAGCATACCGACAGAAAACGGGGAGCTGTTTTTT	TRBV7-2		TRBJ2-2	TRBV7	TRBJ2	CASSIPTENGELFF	TGTGCCAGCAGCATACCGACAGAAAACGGGGAGCTGTTTTTT	:::::::::0:17:18:::::26::42:::	CD4
519	TGTGCCAGCAGCATACCGACAGAGAACACTGAAGCTTTCTTT	TRBV7-2		TRBJ1-1	TRBV7	TRBJ1	CASSIPTENTEAFF	TGTGCCAGCAGCATACCGACAGAGAACACTGAAGCTTTCTTT	:::::::::0:17:18:::::23::42:::	CD4
520	TGTGCCAGCAGCATACTAGCGGGGGGACTCTACGAGCAGTACTTC	TRBV12-3	TRBD2	TRBJ2-7	TRBV12	TRBJ2	CASSILAGGLYEQYF	TGTGCCAGCAGCATACTAGCGGGGGGACTCTACGAGCAGTACTTC	:::::::::0::11:14:::23:24:27:45:::	CD8
521	TGTGCCAGCAGCATACTAGCGGGGGGGAACAATGAGCAGTTCTTC	TRBV7-2	TRBD2	TRBJ2-1	TRBV7	TRBJ2	CASSILAGGNNEQFF	TGTGCCAGCAGCATACTAGCGGGGGGGAACAATGAGCAGTTCTTC	:::::::::0::15:15::27:27:28::45:::	CD8
522	TGTGCCAGCAGCATAGACGGCCTTCCCTACAATGAGCAGTTCTTC	TRBV9		TRBJ2-1	TRBV9*00	TRBJ2	CASSIDGLPYNEQFF	TGTGCCAGCAGCATAGACGGCCTTCCCTACAATGAGCAGTTCTTC	:::::::::0:16:16:::::25::45:::	CD8
523	TGTGCCAGCAGCATAGGACTAGGAGGCACAAGTGAGCAGTTCTTC	TRBV5-4	TRBD2	TRBJ2-1	TRBV5	TRBJ2	CASSIGLGGTSEQFF	TGTGCCAGCAGCATAGGACTAGGAGGCACAAGTGAGCAGTTCTTC	:::::::::0::12:15:::22:27::45:::	CD8
524	TGTGCCAGCAGCATCCTAGCGGGGGAAGCCTTAGACGAGCAGTACTTC	TRBV6-1	TRBD2	TRBJ2-7	TRBV6	TRBJ2	CASSILAGEALDEQYF	TGTGCCAGCAGCATCCTAGCGGGGGAAGCCTTAGACGAGCAGTACTTC	:::::::::0::11:15:::23:34::48:::	CD8
525	TGTGCCAGCAGCATGACACCCAACAATGAGCAGTTCTTC	TRBV6-5		TRBJ2-1	TRBV6	TRBJ2	CASSMTPNNEQFF	TGTGCCAGCAGCATGACACCCAACAATGAGCAGTTCTTC	:::::::::0::11:::::19::39:::	CD8
526	TGTGCCAGCAGCATGGGAGTTCCGTACGAGCAGTACTTC	TRBV7-6		TRBJ2-7	TRBV7	TRBJ2	CASSMGVPYEQYF	TGTGCCAGCAGCATGGGAGTTCCGTACGAGCAGTACTTC	:::::::::0::12:::::15:19:39:::	CD8
527	TGTGCCAGCAGCCAAAATGTAGGACAGGGGACTGAAGCTTTCTTT	TRBV4-2	TRBD1	TRBJ1-1	TRBV4	TRBJ1	CASSQNVGQGTEAFF	TGTGCCAGCAGCCAAAATGTAGGACAGGGGACTGAAGCTTTCTTT	:::::::::0:17:18:21:::30:30::45:::	CD8
528	TGTGCCAGCAGCCAAACCCTTTCAACCGTCTACGAGCAGTACTTC	TRBV3-1		TRBJ2-7	TRBV3	TRBJ2	CASSQTLSTVYEQYF	TGTGCCAGCAGCCAAACCCTTTCAACCGTCTACGAGCAGTACTTC	:::::::::0::15:::::29::45:::	CD8
529	TGTGCCAGCAGCCAAACGACTAGCGGGCGGGAGCAGTACTTC	TRBV4-2	TRBD2	TRBJ2-7	TRBV4	TRBJ2	CASSQTTSGREQYF	TGTGCCAGCAGCCAAACGACTAGCGGGCGGGAGCAGTACTTC	:::::::::0::15:17:::30:30::42:::	CD4
530	TGTGCCAGCAGCCAAACTAGCGTTGCCTACGAGCAGTACTTC	TRBV4-2	TRBD2	TRBJ2-7	TRBV4	TRBJ2	CASSQTSVAYEQYF	TGTGCCAGCAGCCAAACTAGCGTTGCCTACGAGCAGTACTTC	:::::::::0::15:15:::22:25::42:::	CD8
531	TGTGCCAGCAGCCAAATGGGGTACAATGAGCAGTTCTTC	TRBV7-3		TRBJ2-1	TRBV7	TRBJ2	CASSQMGYNEQFF	TGTGCCAGCAGCCAAATGGGGTACAATGAGCAGTTCTTC	:::::::::0::12:::::21::39:::	CD4
532	TGTGCCAGCAGCCAAGAACCGGAGACATACGGGCAGTTCTTC	TRBV14	TRBD1	TRBJ2-1	TRBV14*00	TRBJ2	CASSQEPETYGQFF	TGTGCCAGCAGCCAAGAACCGGAGACATACGGGCAGTTCTTC	:::::::::0:17:17:18:20::27:32::42:::	CD8
533	TGTGCCAGCAGCCAAGAAGGACCATCCCGCGAGCAGTACTTC	TRBV3-1		TRBJ2-7	TRBV3	TRBJ2	CASSQEGPSREQYF	TGTGCCAGCAGCCAAGAAGGACCATCCCGCGAGCAGTACTTC	:::::::::0:17:17:::::17:22:42:::	CD8
534	TGTGCCAGCAGCCAAGAAGGCCGGGGAGCTTTCTTT	TRBV4-2	TRBD1	TRBJ1-1	TRBV4	TRBJ1	CASSQEGRGAFF	TGTGCCAGCAGCCAAGAAGGCCGGGGAGCTTTCTTT	:::::::::0:17:17:20:22::25:26::36:::	CD8
535	TGTGCCAGCAGCCAAGAAGGGATAGCGCGAGAGCAGTACTTC	TRBV4-2	TRBD2	TRBJ2-7	TRBV4	TRBJ2	CASSQEGIAREQYF	TGTGCCAGCAGCCAAGAAGGGATAGCGCGAGAGCAGTACTTC	:::::::::0:17:17:18:18::30:30::42:::	CD8
536	TGTGCCAGCAGCCAAGAAGGTTCCGCGGGGTTGGAGACCCAGTACTTC	TRBV4-2	TRBD2	TRBJ2-5	TRBV4	TRBJ2	CASSQEGSAGLETQYF	TGTGCCAGCAGCCAAGAAGGTTCCGCGGGGTTGGAGACCCAGTACTTC	:::::::::0:17:17:24:::29:33::48:::	CD8
537	TGTGCCAGCAGCCAAGAATCGACTAGCGGGGGGGTACCGAAGTACTTC	TRBV4-2	TRBD2	TRBJ2-4	TRBV4	TRBJ2	CASSQESTSGGVPKYF	TGTGCCAGCAGCCAAGAATCGACTAGCGGGGGGGTACCGAAGTACTTC	:::::::::0:17:17:20::34:34:40::48:::	CD8
538	TGTGCCAGCAGCCAAGACGAGGCCAGGGCTTTCTACTTC	TRBV3-1	TRBD1	TRBJ2-7	TRBV3	TRBJ2	CASSQDEARAFYF	TGTGCCAGCAGCCAAGACGAGGCCAGGGCTTTCTACTTC	:::::::::0:17:17:20:::28:33::39:::	CD4
539	TGTGCCAGCAGCCAAGACGGGAGAAAACTGTTTTTT	TRBV4-2	TRBD2	TRBJ1-4	TRBV4	TRBJ1	CASSQDGRKLFF	TGTGCCAGCAGCCAAGACGGGAGAAAACTGTTTTTT	:::::::::0:17:17:17:::23:23::36:::	CD4
540	TGTGCCAGCAGCCAAGACGGGCGGCAGGAAGTCTTC	TRBV4-2	TRBD2	TRBJ2-1	TRBV4	TRBJ2	CASSQDGRQEVF	TGTGCCAGCAGCCAAGACGGGCGGCAGGAAGTCTTC	:::::::::0:17:17:20:::28:31::36:::	CD4
541	TGTGCCAGCAGCCAAGACGGGTTGAAGCAGTTCTTC	TRBV4-2		TRBJ2-1	TRBV4	TRBJ2	CASSQDGLKQFF	TGTGCCAGCAGCCAAGACGGGTTGAAGCAGTTCTTC	:::::::::0:17:17:::::25::36:::	CD4
542	TGTGCCAGCAGCCAAGAGAACAGGGGGCCTTCACCCCTCCACTTT	TRBV4-2	TRBD1	TRBJ1-6	TRBV4	TRBJ1	CASSQENRGPSPLHF	TGTGCCAGCAGCCAAGAGAACAGGGGGCCTTCACCCCTCCACTTT	:::::::::0:17:17:19::28:28:29::45:::	CD8
543	TGTGCCAGCAGCCAAGAGAGCACCAACTACAATGAGCAGTTCTTC	TRBV4-2		TRBJ2-1	TRBV4	TRBJ2	CASSQESTNYNEQFF	TGTGCCAGCAGCCAAGAGAGCACCAACTACAATGAGCAGTTCTTC	:::::::::0:17:17:::::26::45:::	CD8
544	TGTGCCAGCAGCCAAGAGAGGACCGTACCTTTACGAGCAGTACTTC	TRBV3-1		TRBJ2-7	TRBV3	TRBJ2	CASSQERT_YLYEQYF	TGTGCCAGCAGCCAAGAGAGGACCGTACCTTTACGAGCAGTACTTC	:::::::::0:17:17:::::31::46:::	CD8
545	TGTGCCAGCAGCCAAGAGGAGACACCCTGGTCGACCCAGTACTTC	TRBV4-2	TRBD1	TRBJ2-5	TRBV4	TRBJ2	CASSQEETPWSTQYF	TGTGCCAGCAGCCAAGAGGAGACACCCTGGTCGACCCAGTACTTC	:::::::::0:17:17:24:::29:32::45:::	CD8
546	TGTGCCAGCAGCCAAGAGGATACAGGGAGTGCCAACGTCCTGACTTTC	TRBV4-2	TRBD1	TRBJ2-6	TRBV4	TRBJ2	CASSQEDTGSANVLTF	TGTGCCAGCAGCCAAGAGGATACAGGGAGTGCCAACGTCCTGACTTTC	:::::::::0:17:17:21:::27:30::48:::	CD8
547	TGTGCCAGCAGCCAAGAGGGGCCAGGGACCCAGTACTTC	TRBV4-2	TRBD1	TRBJ2-5	TRBV4	TRBJ2	CASSQEGPGTQYF	TGTGCCAGCAGCCAAGAGGGGCCAGGGACCCAGTACTTC	:::::::::0:17:17:17::22:22:23::39:::	CD4
548	TGTGCCAGCAGCCAAGAGTCAGTCTCCTACAATGAGCAGTTCTTC	TRBV4-2		TRBJ2-1	TRBV4	TRBJ2	CASSQESVSYNEQFF	TGTGCCAGCAGCCAAGAGTCAGTCTCCTACAATGAGCAGTTCTTC	:::::::::0:17:17:::::23:23:45:::	CD8
549	TGTGCCAGCAGCCAAGATATCTTCTATGGCTACACCTTC	TRBV3-1		TRBJ1-2	TRBV3	TRBJ1	CASSQDIFYGYTF	TGTGCCAGCAGCCAAGATATCTTCTATGGCTACACCTTC	:::::::::0:17:18:::::9:20:39:::	CD8
550	TGTGCCAGCAGCCAAGATCAGACAGGGGGCTATTATTCACCCCTCCACTTT	TRBV4-2	TRBD1	TRBJ1-6	TRBV4	TRBJ1	CASSQDQTGGYYSPLHF	TGTGCCAGCAGCCAAGATCAGACAGGGGGCTATTATTCACCCCTCCACTTT	:::::::::0:17:19:20:::29:29::51:::	CD4
551	TGTGCCAGCAGCCAAGATCCCGGACTAGCGACAGATACGCAGTATTTT	TRBV3-1		TRBJ2-3	TRBV3	TRBJ2	CASSQDPGLATDTQYF	TGTGCCAGCAGCCAAGATCCCGGACTAGCGACAGATACGCAGTATTTT	:::::::::0:17:19:::::24:26:48:::	CD8
552	TGTGCCAGCAGCCAAGATCCTAGCGGGGTACTACAAGAGACCCAGTACTTC	TRBV4-2	TRBD2	TRBJ2-5	TRBV4	TRBJ2	CASSQDPSGVLQETQYF	TGTGCCAGCAGCCAAGATCCTAGCGGGGTACTACAAGAGACCCAGTACTTC	:::::::::0:17:19:19:::26:26:29:51:::	CD8
553	TGTGCCAGCAGCCAAGATCGAGAGGAGATCTCCTATAATTCACCCCTCCACTTT	TRBV3-1		TRBJ1-6	TRBV3	TRBJ1	CASSQDREEISYNSPLHF	TGTGCCAGCAGCCAAGATCGAGAGGAGATCTCCTATAATTCACCCCTCCACTTT	:::::::::0:17:19:::::26:29:54:::	CD4
554	TGTGCCAGCAGCCAAGATCGGGAGGGGGAGTTCTAATCAGCCCCAGCATTTT	TRBV3-2	TRBD2	TRBJ1-5	TRBV3	TRBJ1	CASSQDREG_SSNQPQHF	TGTGCCAGCAGCCAAGATCGGGAGGGGGAGTTCTAATCAGCCCCAGCATTTT	:::::::::0:17:19:19::26:26:34::52:::	CD8
555	TGTGCCAGCAGCCAAGATCGGGGGGCGCTTGAGCAGTTCTTC	TRBV4-2	TRBD1	TRBJ2-1	TRBV4	TRBJ2	CASSQDRGALEQFF	TGTGCCAGCAGCCAAGATCGGGGGGCGCTTGAGCAGTTCTTC	:::::::::0:17:19:20::26:28:29::42:::	CD8
556	TGTGCCAGCAGCCAAGATCTGTGGACTAGCGGACAGCAGTTCTTC	TRBV3-1		TRBJ2-1	TRBV3	TRBJ2	CASSQDLWTSGQQFF	TGTGCCAGCAGCCAAGATCTGTGGACTAGCGGACAGCAGTTCTTC	:::::::::0:17:36:::::34::45:::	CD4
557	TGTGCCAGCAGCCAAGATCTGTTGGGAATTTATGGCTACACCTTC	TRBV4-2		TRBJ1-2	TRBV4	TRBJ1	CASSQDLLGIYGYTF	TGTGCCAGCAGCCAAGATCTGTTGGGAATTTATGGCTACACCTTC	:::::::::0:17:20:::::30::45:::	CD8
558	TGTGCCAGCAGCCAAGATGACAGGGGGCTGTTTTTT	TRBV4-2		TRBJ2-2	TRBV4	TRBJ2	CASSQDDRGLFF	TGTGCCAGCAGCCAAGATGACAGGGGGCTGTTTTTT	:::::::::0:17:18:::::19::36:::	CD4
559	TGTGCCAGCAGCCAAGATGGCAGGCGCTACACCTTC	TRBV4-2		TRBJ1-2	TRBV4	TRBJ1	CASSQDGRRYTF	TGTGCCAGCAGCCAAGATGGCAGGCGCTACACCTTC	:::::::::0:17:18:::::25::36:::	CD4
560	TGTGCCAGCAGCCAAGATGGGCGCGGAGCTTTCTTT	TRBV4-2	TRBD1	TRBJ1-1	TRBV4	TRBJ1	CASSQDGRGAFF	TGTGCCAGCAGCCAAGATGGGCGCGGAGCTTTCTTT	:::::::::0:17:18:18::22:24:26::36:::	CD4
561	TGTGCCAGCAGCCAAGATGGGCGGAGTCAGTTCTTC	TRBV4-2	TRBD1	TRBJ2-1	TRBV4	TRBJ2	CASSQDGRSQFF	TGTGCCAGCAGCCAAGATGGGCGGAGTCAGTTCTTC	:::::::::0:17:18:18::22:23:23::36:::	CD4
562	TGTGCCAGCAGCCAAGATGGGCGTCCTGAGACCCAGTACTTC	TRBV4-2	TRBD1	TRBJ2-5	TRBV4	TRBJ2	CASSQDGRPETQYF	TGTGCCAGCAGCCAAGATGGGCGTCCTGAGACCCAGTACTTC	:::::::::0:17:18:18::22:26:27::42:::	CD4
563	TGTGCCAGCAGCCAAGATGGGGAGACCCAGTACTTC	TRBV4-2		TRBJ2-5	TRBV4	TRBJ2	CASSQDGETQYF	TGTGCCAGCAGCCAAGATGGGGAGACCCAGTACTTC	:::::::::0:17:18:::::21::36:::	CD4
564	TGTGCCAGCAGCCAAGATGTGGCAGGGGGCTATGGCTACACCTTC	TRBV4-2	TRBD1	TRBJ1-2	TRBV4	TRBJ1	CASSQDVAGGYGYTF	TGTGCCAGCAGCCAAGATGTGGCAGGGGGCTATGGCTACACCTTC	:::::::::0:17:18:22:::29:29::45:::	CD8
565	TGTGCCAGCAGCCAAGATTATTACGCGGGGGGGCCTCAAGAGACCCAGTACTTC	TRBV3-1	TRBD2	TRBJ2-5	TRBV3	TRBJ2	CASSQDYYAGGPQETQYF	TGTGCCAGCAGCCAAGATTATTACGCGGGGGGGCCTCAAGAGACCCAGTACTTC	:::::::::0:17:18:24::33:35:36::54:::	CD8
566	TGTGCCAGCAGCCAAGATTCCCCAGTCTACAATGAGCAGTTCTTC	TRBV3-1		TRBJ2-1	TRBV3	TRBJ2	CASSQDSPVYNEQFF	TGTGCCAGCAGCCAAGATTCCCCAGTCTACAATGAGCAGTTCTTC	:::::::::0:17:18:::::26::45:::	CD8
567	TGTGCCAGCAGCCAAGATTCGAGCGGGGACGACGAGCAGTACTTC	TRBV4-2	TRBD2	TRBJ2-7	TRBV4	TRBJ2	CASSQDSSGDDEQYF	TGTGCCAGCAGCCAAGATTCGAGCGGGGACGACGAGCAGTACTTC	:::::::::0:17:18:21:::27:31::45:::	CD8
568	TGTGCCAGCAGCCAAGATTCTGGGGCCAACGTCCTGACTTTC	TRBV4-2		TRBJ2-6	TRBV4	TRBJ2	CASSQDSGANVLTF	TGTGCCAGCAGCCAAGATTCTGGGGCCAACGTCCTGACTTTC	:::::::::0:17:18:::::18::42:::	CD4
569	TGTGCCAGCAGCCAAGATTTGGGGACAGCTAGTCAGCCCCAGCATTTT	TRBV4-2	TRBD1	TRBJ1-5	TRBV4	TRBJ1	CASSQDLGTASQPQHF	TGTGCCAGCAGCCAAGATTTGGGGACAGCTAGTCAGCCCCAGCATTTT	:::::::::0:17:22:22:::28:32::48:::	CD4
570	TGTGCCAGCAGCCAAGCCACTGCGTACGAGCAGTACTTC	TRBV4-2		TRBJ2-7	TRBV4	TRBJ2	CASSQATAYEQYF	TGTGCCAGCAGCCAAGCCACTGCGTACGAGCAGTACTTC	:::::::::0::16:::::24::39:::	CD8
571	TGTGCCAGCAGCCAAGCCGGGACAGCCTACGAGCAGTACTTC	TRBV4-2	TRBD1	TRBJ2-7	TRBV4	TRBJ2	CASSQAGTAYEQYF	TGTGCCAGCAGCCAAGCCGGGACAGCCTACGAGCAGTACTTC	:::::::::0::16:16:18::25:25::42:::	CD8
572	TGTGCCAGCAGCCAAGGAAACCGAGGAGGCTACGAGCAGTACTTC	TRBV3-1	TRBD2	TRBJ2-7	TRBV3	TRBJ2	CASSQGNRGGYEQYF	TGTGCCAGCAGCCAAGGAAACCGAGGAGGCTACGAGCAGTACTTC	:::::::::0::16:24:::29:29::45:::	CD8
573	TGTGCCAGCAGCCAAGGACAGGGGGAAGAGACCCAGTACTTC	TRBV3-2	TRBD1	TRBJ2-5	TRBV3	TRBJ2	CASSQGQGEETQYF	TGTGCCAGCAGCCAAGGACAGGGGGAAGAGACCCAGTACTTC	:::::::::0::16:16:::25:25::42:::	CD8
574	TGTGCCAGCAGCCAAGGACAGGGGGCCTACGAGCAGTACTTC	TRBV3-1	TRBD1	TRBJ2-7	TRBV3	TRBJ2	CASSQGQGAYEQYF	TGTGCCAGCAGCCAAGGACAGGGGGCCTACGAGCAGTACTTC	:::::::::0::16:16:::25:25::42:::	CD8
575	TGTGCCAGCAGCCAAGGAGCACTAGCGGGGGCCTACGAGCAGTACTTC	TRBV4-2	TRBD2	TRBJ2-7	TRBV4	TRBJ2	CASSQGALAGAYEQYF	TGTGCCAGCAGCCAAGGAGCACTAGCGGGGGCCTACGAGCAGTACTTC	:::::::::0::16:20:::29:31::48:::	CD8
576	TGTGCCAGCAGCCAAGGAGGGCAGATAGGCAATGAGCAGTTCTTC	TRBV4-2	TRBD2	TRBJ2-1	TRBV4	TRBJ2	CASSQGGQIGNEQFF	TGTGCCAGCAGCCAAGGAGGGCAGATAGGCAATGAGCAGTTCTTC	:::::::::0::16:16::21:22:29::45:::	CD4
577	TGTGCCAGCAGCCAAGGATTTAGCGCCACAGTACTACACGAGACCCAGTACTTC	TRBV4-2	TRBD1	TRBJ2-5	TRBV4	TRBJ2	CASSQGFSATVLHETQYF	TGTGCCAGCAGCCAAGGATTTAGCGCCACAGTACTACACGAGACCCAGTACTTC	:::::::::0::16:22::24:27:36::54:::	CD4
578	TGTGCCAGCAGCCAAGGGGAGTACGAGCAGTACTTC	TRBV3-1	TRBD2	TRBJ2-7	TRBV3	TRBJ2	CASSQGEYEQYF	TGTGCCAGCAGCCAAGGGGAGTACGAGCAGTACTTC	:::::::::0::16:16:::21:21::36:::	CD8
579	TGTGCCAGCAGCCAAGGGGCGGCCTCATTCTGGGAGACCCAGTACTTC	TRBV14	TRBD1	TRBJ2-5	TRBV14*00	TRBJ2	CASSQGAASFWETQYF	TGTGCCAGCAGCCAAGGGGCGGCCTCATTCTGGGAGACCCAGTACTTC	:::::::::0::16:16::20:24:33::48:::	CD4
580	TGTGCCAGCAGCCAAGGGGCTACGTTCTCCTACGAGCAGTACTTC	TRBV4-2		TRBJ2-7	TRBV4	TRBJ2	CASSQGATFSYEQYF	TGTGCCAGCAGCCAAGGGGCTACGTTCTCCTACGAGCAGTACTTC	:::::::::0::16:::::26:26:45:::	CD8
581	TGTGCCAGCAGCCAAGGGGGCTCTTCGCAGGCTTTCTTT	TRBV6-1	TRBD1	TRBJ1-1	TRBV6	TRBJ1	CASSQGGSSQAFF	TGTGCCAGCAGCCAAGGGGGCTCTTCGCAGGCTTTCTTT	:::::::::0::11:14::21:21:30::39:::	CD8
582	TGTGCCAGCAGCCAAGGGTCTAGGGGTTATAATTCACCCCTCCACTTT	TRBV14	TRBD1	TRBJ1-6	TRBV14*00	TRBJ1	CASSQGSRGYNSPLHF	TGTGCCAGCAGCCAAGGGTCTAGGGGTTATAATTCACCCCTCCACTTT	:::::::::0::16:21:::26:27::48:::	CD4
583	TGTGCCAGCAGCCAAGGTTCGGGGGGCAATGGCTACACCTTC	TRBV4-2	TRBD1	TRBJ1-2	TRBV4	TRBJ1	CASSQGSGGNGYTF	TGTGCCAGCAGCCAAGGTTCGGGGGGCAATGGCTACACCTTC	:::::::::0::16:21::27:27:28::42:::	CD8
584	TGTGCCAGCAGCCAAGTAACCCCTGGCAGGGGGTACACAGATACGCAGTATTTT	TRBV14	TRBD1	TRBJ2-3	TRBV14*00	TRBJ2	CASSQVTPGRGYTDTQYF	TGTGCCAGCAGCCAAGTAACCCCTGGCAGGGGGTACACAGATACGCAGTATTTT	:::::::::0::16:20:23::33:35::54:::	CD4
585	TGTGCCAGCAGCCAAGTAGCGGGGGGCAACAATGAGCAGTTCTTC	TRBV4-2	TRBD2	TRBJ2-1	TRBV4	TRBJ2	CASSQVAGGNNEQFF	TGTGCCAGCAGCCAAGTAGCGGGGGGCAACAATGAGCAGTTCTTC	:::::::::0::16:16::26:27:28::45:::	CD8
586	TGTGCCAGCAGCCAAGTCGGGGGACAGAACACCGGGGAGCTGTTTTTT	TRBV14	TRBD1	TRBJ2-2	TRBV14*00	TRBJ2	CASSQVGGQNTGELFF	TGTGCCAGCAGCCAAGTCGGGGGACAGAACACCGGGGAGCTGTTTTTT	:::::::::0::16:20:20::26:26::48:::	CD4
587	TGTGCCAGCAGCCAAGTGAATAGCGGGGGGCCCGGGGAGCTGTTTTTT	TRBV3-1	TRBD2	TRBJ2-2	TRBV3	TRBJ2	CASSQVNSGGPGELFF	TGTGCCAGCAGCCAAGTGAATAGCGGGGGGCCCGGGGAGCTGTTTTTT	:::::::::0::16:17::30:31:31::48:::	CD8
588	TGTGCCAGCAGCCAAGTGGGGCAGGCGTTCTCTGGAAACACCATATATTTT	TRBV4-2	TRBD1	TRBJ1-3	TRBV4	TRBJ1	CASSQVGQAFSGNTIYF	TGTGCCAGCAGCCAAGTGGGGCAGGCGTTCTCTGGAAACACCATATATTTT	:::::::::0::16:17:17::25:29:29:51:::	CD4
589	TGTGCCAGCAGCCAAGTGTCCGGGGAGCTGTTTTTT	TRBV3-1		TRBJ2-2	TRBV3	TRBJ2	CASSQVSGELFF	TGTGCCAGCAGCCAAGTGTCCGGGGAGCTGTTTTTT	:::::::::0::16:::::19::36:::	CD4
590	TGTGCCAGCAGCCAATACCTCCCGGGACTAGCGGGGGTTGACTCCTACAATGAGCAGTTCTTC	TRBV7-3	TRBD2	TRBJ2-1	TRBV7	TRBJ2	CASSQYLPGLAGVDSYNEQFF	TGTGCCAGCAGCCAATACCTCCCGGGACTAGCGGGGGTTGACTCCTACAATGAGCAGTTCTTC	:::::::::0::12:19:23::35:41:41:63:::	CD8
591	TGTGCCAGCAGCCACAGACAGGGTCCACTGAAGCTTTCTTT	TRBV3-1	TRBD1	TRBJ1-1	TRBV3	TRBJ1	CASSHRQ_STEAFF	TGTGCCAGCAGCCACAGACAGGGTCCACTGAAGCTTTCTTT	:::::::::0:18:18:18:::23:25::41:::	CD8
592	TGTGCCAGCAGCCACATCGGAAGGGGACCCAACTACGAGCAGTACTTC	TRBV3-1	TRBD1	TRBJ2-7	TRBV3	TRBJ2	CASSHIGRGPNYEQYF	TGTGCCAGCAGCCACATCGGAAGGGGACCCAACTACGAGCAGTACTTC	:::::::::0::14:18:::26:32::48:::	CD8
593	TGTGCCAGCAGCCACCCCGGGGCAGAACAGTTCTTC	TRBV4-2	TRBD1	TRBJ2-1	TRBV4	TRBJ2	CASSHPGAEQFF	TGTGCCAGCAGCCACCCCGGGGCAGAACAGTTCTTC	:::::::::0::14:15:18::24:24::36:::	CD8
594	TGTGCCAGCAGCCACCGGGACAGGGGAGCGGAGACCCAGTACTTC	TRBV7-9	TRBD1	TRBJ2-5	TRBV7	TRBJ2	CASSHRDRGAETQYF	TGTGCCAGCAGCCACCGGGACAGGGGAGCGGAGACCCAGTACTTC	:::::::::0::12:14:16:29:30:30::45:::	CD8
595	TGTGCCAGCAGCCACGAGACAAACACTGAAGCTTTCTTT	TRBV5-5		TRBJ1-1	TRBV5	TRBJ1	CASSHETNTEAFF	TGTGCCAGCAGCCACGAGACAAACACTGAAGCTTTCTTT	:::::::::0::12:::::21::39:::	CD8
596	TGTGCCAGCAGCCACGAGACCCAAGAGACCCAGTACTTC	TRBV3-1		TRBJ2-5	TRBV3	TRBJ2	CASSHETQETQYF	TGTGCCAGCAGCCACGAGACCCAAGAGACCCAGTACTTC	:::::::::0:17:17:::::20::39:::	CD8
597	TGTGCCAGCAGCCACGGACAAATGGGCCAGCCCCAGCATTTT	TRBV27	TRBD1	TRBJ1-5	TRBV27*00	TRBJ1	CASSHGQMGQPQHF	TGTGCCAGCAGCCACGGACAAATGGGCCAGCCCCAGCATTTT	:::::::::0::11:15:::20:27::42:::	CD8
598	TGTGCCAGCAGCCACGGCGGGGTGGCCTACGAGCAGTACTTC	TRBV14	TRBD2	TRBJ2-7	TRBV14*00	TRBJ2	CASSHGGVAYEQYF	TGTGCCAGCAGCCACGGCGGGGTGGCCTACGAGCAGTACTTC	:::::::::0::14:16:::21:25::42:::	CD8
599	TGTGCCAGCAGCCACGGGGGAGCCTACGAGCAGTACTTC	TRBV7-8	TRBD1	TRBJ2-7	TRBV7	TRBJ2	CASSHGGAYEQYF	TGTGCCAGCAGCCACGGGGGAGCCTACGAGCAGTACTTC	:::::::::0::12:15:::20:22::39:::	CD8
600	TGTGCCAGCAGCCACTACCCCGGGACAGGGAGCGATGGCTACACCTTC	TRBV3-1	TRBD1	TRBJ1-2	TRBV3	TRBJ1	CASSHYPGTGSDGYTF	TGTGCCAGCAGCCACTACCCCGGGACAGGGAGCGATGGCTACACCTTC	:::::::::0::14:18:21:33:34:34::48:::	CD8
601	TGTGCCAGCAGCCAGACAGGGTCCCACGAGCAGTACTTC	TRBV11-2	TRBD1	TRBJ2-7	TRBV11	TRBJ2	CASSQTGSHEQYF	TGTGCCAGCAGCCAGACAGGGTCCCACGAGCAGTACTTC	:::::::::0::12:14:::21:21::39:::	CD8
602	TGTGCCAGCAGCCAGGATGGACGGGTCCAAACCTTC	TRBV4-2		TRBJ1-2	TRBV4	TRBJ1	CASSQDGRVQTF	TGTGCCAGCAGCCAGGATGGACGGGTCCAAACCTTC	:::::::::0:17:18:::::30::36:::	CD4
603	TGTGCCAGCAGCCAGGGACAGGGGTCCTACGAGCAGTACTTC	TRBV4-2	TRBD1	TRBJ2-7	TRBV4	TRBJ2	CASSQGQGSYEQYF	TGTGCCAGCAGCCAGGGACAGGGGTCCTACGAGCAGTACTTC	:::::::::0::14:14:14::24:24::42:::	CD8
604	TGTGCCAGCAGCCAGGGACTAGCGGGGAGCTCCTACAATGAGCAGTTCTTC	TRBV5-4	TRBD2	TRBJ2-1	TRBV5	TRBJ2	CASSQGLAGSSYNEQFF	TGTGCCAGCAGCCAGGGACTAGCGGGGAGCTCCTACAATGAGCAGTTCTTC	:::::::::0::12:14:14::25:25:29:51:::	CD4
605	TGTGCCAGCAGCCAGGGCACAGATACGCAGTATTTT	TRBV3-1		TRBJ2-3	TRBV3	TRBJ2	CASSQGTDTQYF	TGTGCCAGCAGCCAGGGCACAGATACGCAGTATTTT	:::::::::0::14:::::16::36:::	CD8
606	TGTGCCAGCAGCCAGGGCCCAGTTGCGAGCCCAGATACGCAGTATTTT	TRBV3-1	TRBD2	TRBJ2-3	TRBV3	TRBJ2	CASSQGPVASPDTQYF	TGTGCCAGCAGCCAGGGCCCAGTTGCGAGCCCAGATACGCAGTATTTT	:::::::::0::14:14::17:20:23:27:48:::	CD8
607	TGTGCCAGCAGCCAGGGCGACAGGACGTACGAAGCTTTCTTT	TRBV9	TRBD1	TRBJ1-1	TRBV9*00	TRBJ1	CASSQGDRTYEAFF	TGTGCCAGCAGCCAGGGCGACAGGACGTACGAAGCTTTCTTT	:::::::::0::12:18:::24:30::42:::	CD8
608	TGTGCCAGCAGCCAGGGGGAACGGCTCTACAATGAGCAGTTCTTC	TRBV9	TRBD1	TRBJ2-1	TRBV9*00	TRBJ2	CASSQGERLYNEQFF	TGTGCCAGCAGCCAGGGGGAACGGCTCTACAATGAGCAGTTCTTC	:::::::::0::12:12:::19:23:24:45:::	CD8
609	TGTGCCAGCAGCCAGGGGGGGGTGGACTCAGATACGCAGTATTTT	TRBV3-1	TRBD1	TRBJ2-3	TRBV3	TRBJ2	CASSQGGVDSDTQYF	TGTGCCAGCAGCCAGGGGGGGGTGGACTCAGATACGCAGTATTTT	:::::::::0::14:14:::19:28::45:::	CD4
610	TGTGCCAGCAGCCAGGGTTACTACAATGAGCAGTTCTTC	TRBV7-2	TRBD1	TRBJ2-1	TRBV7	TRBJ2	CASSQGYYNEQFF	TGTGCCAGCAGCCAGGGTTACTACAATGAGCAGTTCTTC	:::::::::0::12:12:::17:20::39:::	CD4
611	TGTGCCAGCAGCCATACAGGGGTTAGCACTGAAGCTTTCTTT	TRBV4-2	TRBD1	TRBJ1-1	TRBV4	TRBJ1	CASSHTGVSTEAFF	TGTGCCAGCAGCCATACAGGGGTTAGCACTGAAGCTTTCTTT	:::::::::0::14:15:::22:26::42:::	CD8
612	TGTGCCAGCAGCCATACAGGTTGGGAGTACTTC	TRBV14	TRBD1	TRBJ2-7	TRBV14*00	TRBJ2	CASSHTGWEYF	TGTGCCAGCAGCCATACAGGTTGGGAGTACTTC	:::::::::0::14:15:::20:25::33:::	CD8
613	TGTGCCAGCAGCCATCCTTCGGGACTGGGGATTGGGGAGCAGTACGTC	TRBV7-8	TRBD1	TRBJ2-7	TRBV7	TRBJ2	CASSHPSGLGIGEQYV	TGTGCCAGCAGCCATCCTTCGGGACTGGGGATTGGGGAGCAGTACGTC	:::::::::0::12:19:20::30:36::48:::	CD8
614	TGTGCCAGCAGCCATCGGACAGGGGGCGAGCAGTACTTC	TRBV3-1	TRBD1	TRBJ2-7	TRBV3	TRBJ2	CASSHRTGGEQYF	TGTGCCAGCAGCCATCGGACAGGGGGCGAGCAGTACTTC	:::::::::0::14:16:::26:26::39:::	CD8
615	TGTGCCAGCAGCCATGACCGGGACAGGGCGACGAACGGCTATGGCTACACCTTC	TRBV4-2	TRBD1	TRBJ1-2	TRBV4	TRBJ1	CASSHDRDRATNGYGYTF	TGTGCCAGCAGCCATGACCGGGACAGGGCGACGAACGGCTATGGCTACACCTTC	:::::::::0:17:17:17:19::28:38::54:::	CD8
616	TGTGCCAGCAGCCATGACGATCAGCCCCAGCATTTT	TRBV5-4		TRBJ1-5	TRBV5	TRBJ1	CASSHDDQPQHF	TGTGCCAGCAGCCATGACGATCAGCCCCAGCATTTT	:::::::::0::12:::::19::36:::	CD4
617	TGTGCCAGCAGCCATGAGACAGGGGGCACCGGGGAGCTGTTTTTT	TRBV4-2	TRBD1	TRBJ2-2	TRBV4	TRBJ2	CASSHETGGTGELFF	TGTGCCAGCAGCCATGAGACAGGGGGCACCGGGGAGCTGTTTTTT	:::::::::0:17:17:17:::26:26::45:::	CD8
618	TGTGCCAGCAGCCATGGCAGTACAAGCAATCAGCCCCAGCATTTT	TRBV3-1		TRBJ1-5	TRBV3	TRBJ1	CASSHGSTSNQPQHF	TGTGCCAGCAGCCATGGCAGTACAAGCAATCAGCCCCAGCATTTT	:::::::::0::14:::::24::45:::	CD8
619	TGTGCCAGCAGCCATGGGGACAGGGAAAATTCACCCCTCCACTTT	TRBV5-6	TRBD1	TRBJ1-6	TRBV5	TRBJ1	CASSHGDRENSPLHF	TGTGCCAGCAGCCATGGGGACAGGGAAAATTCACCCCTCCACTTT	:::::::::0::12:16:16::25:27::45:::	CD4
620	TGTGCCAGCAGCCCAAATTTCGGGTCCTACGAGCAGTACTTC	TRBV9		TRBJ2-7	TRBV9*00	TRBJ2	CASSPNFGSYEQYF	TGTGCCAGCAGCCCAAATTTCGGGTCCTACGAGCAGTACTTC	:::::::::0::12:::::24::42:::	CD4
621	TGTGCCAGCAGCCCAAGGGACAGGGTACTGTACGAGCAGTACTTC	TRBV9	TRBD1	TRBJ2-7	TRBV9*00	TRBJ2	CASSPRDRVLYEQYF	TGTGCCAGCAGCCCAAGGGACAGGGTACTGTACGAGCAGTACTTC	:::::::::0::12:16:16::25:30::45:::	CD8
622	TGTGCCAGCAGCCCAAGGGGGTTAGCGGGGGGGGTAAGCAATGAGCAGTTCTTC	TRBV11-2	TRBD2	TRBJ2-1	TRBV11	TRBJ2	CASSPRGLAGGVSNEQFF	TGTGCCAGCAGCCCAAGGGGGTTAGCGGGGGGGGTAAGCAATGAGCAGTTCTTC	:::::::::0::12:22::33:33:38::54:::	CD4
623	TGTGCCAGCAGCCCACAGACCGGGGAGCTGTTTTTT	TRBV3-1		TRBJ2-2	TRBV3	TRBJ2	CASSPQTGELFF	TGTGCCAGCAGCCCACAGACCGGGGAGCTGTTTTTT	:::::::::0::13:::::18::36:::	CD4
624	TGTGCCAGCAGCCCACAGGGCGACACTGAAGCTTTCTTT	TRBV6-1	TRBD1	TRBJ1-1	TRBV6	TRBJ1	CASSPQGDTEAFF	TGTGCCAGCAGCCCACAGGGCGACACTGAAGCTTTCTTT	:::::::::0::11:14:::20:22::39:::	CD8
625	TGTGCCAGCAGCCCACAGGGCGCCTACGAGCAGTACTTC	TRBV27		TRBJ2-7	TRBV27*00	TRBJ2	CASSPQGAYEQYF	TGTGCCAGCAGCCCACAGGGCGCCTACGAGCAGTACTTC	:::::::::0::11:::::16:20:39:::	CD8
626	TGTGCCAGCAGCCCACCTTCGGGACTCAACACCGGGGAGCTGTTTTTT	TRBV7-9	TRBD2	TRBJ2-2	TRBV7	TRBJ2	CASSPPSGLNTGELFF	TGTGCCAGCAGCCCACCTTCGGGACTCAACACCGGGGAGCTGTTTTTT	:::::::::0::12:19:20::26:27::48:::	CD8
627	TGTGCCAGCAGCCCACGACAGGGGGCAGGGCCCCTCCACTTT	TRBV3-1	TRBD1	TRBJ1-6	TRBV3	TRBJ1	CASSPRQGAGPLHF	TGTGCCAGCAGCCCACGACAGGGGGCAGGGCCCCTCCACTTT	:::::::::0::13:16::26:26:30::42:::	CD8
628	TGTGCCAGCAGCCCACGGGACAGGCTTTTCTACGAGCAGTACTTC	TRBV9	TRBD1	TRBJ2-7	TRBV9*00	TRBJ2	CASSPRDRLFYEQYF	TGTGCCAGCAGCCCACGGGACAGGCTTTTCTACGAGCAGTACTTC	:::::::::0::12:15:16::24:29::45:::	CD8
629	TGTGCCAGCAGCCCACGGGACAGGTTGAACACTGAAGCTTTCTTT	TRBV9	TRBD1	TRBJ1-1	TRBV9*00	TRBJ1	CASSPRDRLNTEAFF	TGTGCCAGCAGCCCACGGGACAGGTTGAACACTGAAGCTTTCTTT	:::::::::0::12:15:16::24:25:25:45:::	CD8
630	TGTGCCAGCAGCCCACTGGCGGACCTCCTCTATGGCTACACCTTC	TRBV7-6	TRBD2	TRBJ1-2	TRBV7	TRBJ1	CASSPLADLLYGYTF	TGTGCCAGCAGCCCACTGGCGGACCTCCTCTATGGCTACACCTTC	:::::::::0::12:14:::22:29::45:::	CD4
631	TGTGCCAGCAGCCCAGACAGCGCCAGCCATGAAAAACTGTTTTTT	TRBV7-9	TRBD1	TRBJ1-4	TRBV7	TRBJ1	CASSPDSASHEKLFF	TGTGCCAGCAGCCCAGACAGCGCCAGCCATGAAAAACTGTTTTTT	:::::::::0::12:15:::20:28::45:::	CD4
632	TGTGCCAGCAGCCCAGACGCCGGGACAGCCTACGAGCAGTACTTC	TRBV9	TRBD1	TRBJ2-7	TRBV9*00	TRBJ2	CASSPDAGTAYEQYF	TGTGCCAGCAGCCCAGACGCCGGGACAGCCTACGAGCAGTACTTC	:::::::::0::12:19:21::28:28::45:::	CD8
633	TGTGCCAGCAGCCCAGACTATCAACCCTACGAGCAGTACGTC	TRBV7-9	TRBD2	TRBJ2-7	TRBV7	TRBJ2	CASSPDYQPYEQYV	TGTGCCAGCAGCCCAGACTATCAACCCTACGAGCAGTACGTC	:::::::::0::12:15:::20:25::42:::	CD4
634	TGTGCCAGCAGCCCAGAGAATAGCAATCAGCCCCAGCATTTT	TRBV4-2		TRBJ1-5	TRBV4	TRBJ1	CASSPENSNQPQHF	TGTGCCAGCAGCCCAGAGAATAGCAATCAGCCCCAGCATTTT	:::::::::0:17:17:::::19:20:42:::	CD8
635	TGTGCCAGCAGCCCAGGACAGGACAGGCTGTACTTC	TRBV7-3	TRBD1	TRBJ2-4	TRBV7	TRBJ2	CASSPGQDRLYF	TGTGCCAGCAGCCCAGGACAGGACAGGCTGTACTTC	:::::::::0::12:12:14::22:29::36:::	CD4
636	TGTGCCAGCAGCCCAGGAGGGGCCACTGAAGCTTTCTTT	TRBV9	TRBD2	TRBJ1-1	TRBV9*00	TRBJ1	CASSPGGATEAFF	TGTGCCAGCAGCCCAGGAGGGGCCACTGAAGCTTTCTTT	:::::::::0::12:15::21:21:23::39:::	CD8
637	TGTGCCAGCAGCCCAGGCGCGGGGGGCCAATACAATGAGCAGTTCTTC	TRBV9	TRBD2	TRBJ2-1	TRBV9*00	TRBJ2	CASSPGAGGQYNEQFF	TGTGCCAGCAGCCCAGGCGCGGGGGGCCAATACAATGAGCAGTTCTTC	:::::::::0::12:18::26:28:30::48:::	CD8
638	TGTGCCAGCAGCCCAGGGACTGACAGCTCTGGAAACACCATATATTTT	TRBV7-6	TRBD2	TRBJ1-3	TRBV7	TRBJ1	CASSPGTDSSGNTIYF	TGTGCCAGCAGCCCAGGGACTGACAGCTCTGGAAACACCATATATTTT	:::::::::0::12:12:15::21:24:26:48:::	CD8
639	TGTGCCAGCAGCCCAGGGGACAGACAATACAATGAGCAGTTCTTC	TRBV7-8	TRBD1	TRBJ2-1	TRBV7	TRBJ2	CASSPGDRQYNEQFF	TGTGCCAGCAGCCCAGGGGACAGACAATACAATGAGCAGTTCTTC	:::::::::0::12:16:16::23:27::45:::	CD8
640	TGTGCCAGCAGCCCAGGGGCAGGTGCTGAAGCTTTCTTT	TRBV12-4	TRBD1	TRBJ1-1	TRBV12	TRBJ1	CASSPGAGAEAFF	TGTGCCAGCAGCCCAGGGGCAGGTGCTGAAGCTTTCTTT	:::::::::0::11:13:::19:25::39:::	CD8
641	TGTGCCAGCAGCCCAGGGGGGGTGGGTTACAATGAGCAGTTCTTC	TRBV9	TRBD1	TRBJ2-1	TRBV9*00	TRBJ2	CASSPGGVGYNEQFF	TGTGCCAGCAGCCCAGGGGGGGTGGGTTACAATGAGCAGTTCTTC	:::::::::0::12:13:::20:27::45:::	CD8
642	TGTGCCAGCAGCCCATCAACTAGCGGGGCCTCCTACGAGCAGTACGTC	TRBV27	TRBD2	TRBJ2-7	TRBV27*00	TRBJ2	CASSPSTSGASYEQYV	TGTGCCAGCAGCCCATCAACTAGCGGGGCCTCCTACGAGCAGTACGTC	:::::::::0::11:18:::27:29:29:48:::	CD8
643	TGTGCCAGCAGCCCATCCCTAGGGGGGGCATATGGCTACACCTTC	TRBV3-1	TRBD1	TRBJ1-2	TRBV3	TRBJ1	CASSPSLGGAYGYTF	TGTGCCAGCAGCCCATCCCTAGGGGGGGCATATGGCTACACCTTC	:::::::::0::13:20::27:29:30::45:::	CD8
644	TGTGCCAGCAGCCCCAACTACGATGGCTACACCTTC	TRBV7-9		TRBJ1-2	TRBV7	TRBJ1	CASSPNYDGYTF	TGTGCCAGCAGCCCCAACTACGATGGCTACACCTTC	:::::::::0::12:::::19::36:::	CD8
645	TGTGCCAGCAGCCCCAATCTACAGGGGGCGTGGGGCTACACCTTC	TRBV6-6	TRBD1	TRBJ1-2	TRBV6	TRBJ1	CASSPNLQGAWGYTF	TGTGCCAGCAGCCCCAATCTACAGGGGGCGTGGGGCTACACCTTC	:::::::::0::11:20::29:30:33::45:::	CD8
646	TGTGCCAGCAGCCCCACCGGGGGCCAGCCCCAGCATTTT	TRBV6-2	TRBD1	TRBJ1-5	TRBV6	TRBJ1	CASSPTGGQPQHF	TGTGCCAGCAGCCCCACCGGGGGCCAGCCCCAGCATTTT	:::::::::0::11:15::24:24:24::39:::	CD8
647	TGTGCCAGCAGCCCCACTTTCGTTGCTGGGGCCAACGTCCTGACTTTC	TRBV9		TRBJ2-6	TRBV9*00	TRBJ2	CASSPTFVAGANVLTF	TGTGCCAGCAGCCCCACTTTCGTTGCTGGGGCCAACGTCCTGACTTTC	:::::::::0::12:::::25::48:::	CD8
648	TGTGCCAGCAGCCCCAGGGACAGACTGAACACTGAAGCTTTCTTT	TRBV9	TRBD1	TRBJ1-1	TRBV9*00	TRBJ1	CASSPRDRLNTEAFF	TGTGCCAGCAGCCCCAGGGACAGACTGAACACTGAAGCTTTCTTT	:::::::::0::12:12:16::23:25:25:45:::	CD8
649	TGTGCCAGCAGCCCCAGGGACAGGTTGAACACTGAAGCTTTCTTT	TRBV9	TRBD1	TRBJ1-1	TRBV9*00	TRBJ1	CASSPRDRLNTEAFF	TGTGCCAGCAGCCCCAGGGACAGGTTGAACACTGAAGCTTTCTTT	:::::::::0::12:12:16::24:25:25:45:::	0
650	TGTGCCAGCAGCCCCATAAGCGGGGGGTACTACGAGCAGTACTTC	TRBV9	TRBD2	TRBJ2-7	TRBV9*00	TRBJ2	CASSPISGGYYEQYF	TGTGCCAGCAGCCCCATAAGCGGGGGGTACTACGAGCAGTACTTC	:::::::::0::12:18::27:27:29::45:::	CD8
651	TGTGCCAGCAGCCCCCACAGGGAACTATGGCTACACCTTC	TRBV7-3	TRBD1	TRBJ1-2	TRBV7	TRBJ1	CASSPHR_NYGYTF	TGTGCCAGCAGCCCCCACAGGGAACTATGGCTACACCTTC	:::::::::0::12:16:::22:22::40:::	CD8
652	TGTGCCAGCAGCCCCCATAGCGGGGGGACTAGCACAGATACGCAGTATTTT	TRBV9	TRBD2	TRBJ2-3	TRBV9*00	TRBJ2	CASSPHSGGTSTDTQYF	TGTGCCAGCAGCCCCCATAGCGGGGGGACTAGCACAGATACGCAGTATTTT	:::::::::0::12:17::27:27:28:30:51:::	CD8
653	TGTGCCAGCAGCCCCCATGGCGGGGCCGAGCAGTACTTC	TRBV7-2	TRBD1	TRBJ2-7	TRBV7	TRBJ2	CASSPHGGAEQYF	TGTGCCAGCAGCCCCCATGGCGGGGCCGAGCAGTACTTC	:::::::::0::12:21::26:26:26::39:::	CD8
654	TGTGCCAGCAGCCCCCCCGCTGGGGGACAGGGGGCTTACGAGCAGTACTTC	TRBV6-1	TRBD1	TRBJ2-7	TRBV6	TRBJ2	CASSPPAGGQGAYEQYF	TGTGCCAGCAGCCCCCCCGCTGGGGGACAGGGGGCTTACGAGCAGTACTTC	:::::::::0::11:23:23:35:35:36::51:::	CD8
655	TGTGCCAGCAGCCCCCCGGGACAGGGGTTTTCCTCCTACGAGCAGTACTTC	TRBV6-2	TRBD1	TRBJ2-7	TRBV6	TRBJ2	CASSPPGQGFSSYEQYF	TGTGCCAGCAGCCCCCCGGGACAGGGGTTTTCCTCCTACGAGCAGTACTTC	:::::::::0::11:14:17::27:32:32:51:::	CD8
656	TGTGCCAGCAGCCCCCGAGACAGACTTAATTCACCCCTCCACTTT	TRBV9	TRBD1	TRBJ1-6	TRBV9*00	TRBJ1	CASSPRDRLNSPLHF	TGTGCCAGCAGCCCCCGAGACAGACTTAATTCACCCCTCCACTTT	:::::::::0::12:13:16::23:26::45:::	CD8
657	TGTGCCAGCAGCCCCCGAGACAGGCTCCACTACGAGCAGTACTTC	TRBV9	TRBD1	TRBJ2-7	TRBV9*00	TRBJ2	CASSPRDRLHYEQYF	TGTGCCAGCAGCCCCCGAGACAGGCTCCACTACGAGCAGTACTTC	:::::::::0::12:13:16::24:29::45:::	CD8
658	TGTGCCAGCAGCCCCCGGACAGTAGATGAGCAGTTCTTC	TRBV9	TRBD1	TRBJ2-1	TRBV9*00	TRBJ2	CASSPRTVDEQFF	TGTGCCAGCAGCCCCCGGACAGTAGATGAGCAGTTCTTC	:::::::::0::12:12:15::22:25::39:::	CD8
659	TGTGCCAGCAGCCCCCGGGACAGACTAAACACTGAAGCTTTCTTT	TRBV9	TRBD1	TRBJ1-1	TRBV9*00	TRBJ1	CASSPRDRLNTEAFF	TGTGCCAGCAGCCCCCGGGACAGACTAAACACTGAAGCTTTCTTT	:::::::::0::12:13:16::23:27::45:::	CD8
660	TGTGCCAGCAGCCCCCGGGACAGACTGAACACTGAAGCTTTCTTT	TRBV9	TRBD1	TRBJ1-1	TRBV9*00	TRBJ1	CASSPRDRLNTEAFF	TGTGCCAGCAGCCCCCGGGACAGACTGAACACTGAAGCTTTCTTT	:::::::::0::12:13:16::23:25:25:45:::	CD8
661	TGTGCCAGCAGCCCCCGGGACAGGCTAACCTACGAGCAGTACTTC	TRBV9	TRBD1	TRBJ2-7	TRBV9*00	TRBJ2	CASSPRDRLTYEQYF	TGTGCCAGCAGCCCCCGGGACAGGCTAACCTACGAGCAGTACTTC	:::::::::0::12:13:16::24:28::45:::	CD8
662	TGTGCCAGCAGCCCCCGGGACAGGCTTAACACTGAAGCTTTCTTT	TRBV9	TRBD1	TRBJ1-1	TRBV9*00	TRBJ1	CASSPRDRLNTEAFF	TGTGCCAGCAGCCCCCGGGACAGGCTTAACACTGAAGCTTTCTTT	:::::::::0::12:13:16::24:27::45:::	CD8
663	TGTGCCAGCAGCCCCCGGGACAGGTTGAACACTGAAGCTTTCTTT	TRBV9	TRBD1	TRBJ1-1	TRBV9*00	TRBJ1	CASSPRDRLNTEAFF	TGTGCCAGCAGCCCCCGGGACAGGTTGAACACTGAAGCTTTCTTT	:::::::::0::12:13:16::24:25:25:45:::	CD8
664	TGTGCCAGCAGCCCCCGGGACCGATTGAACACTGAAGCTTTCTTT	TRBV9	TRBD1	TRBJ1-1	TRBV9*00	TRBJ1	CASSPRDRLNTEAFF	TGTGCCAGCAGCCCCCGGGACCGATTGAACACTGAAGCTTTCTTT	:::::::::0::12:13:16::21:25:25:45:::	CD8
665	TGTGCCAGCAGCCCCGACGCTAGCGGGGGGTCTTACAATGAGCAGTTCTTC	TRBV11-1	TRBD2	TRBJ2-1	TRBV11	TRBJ2	CASSPDASGGSYNEQFF	TGTGCCAGCAGCCCCGACGCTAGCGGGGGGTCTTACAATGAGCAGTTCTTC	:::::::::0::12:19::30:30:30::51:::	CD8
666	TGTGCCAGCAGCCCCGACTCTGGGGCCAACGTCCTGACTTTC	TRBV9		TRBJ2-6	TRBV9*00	TRBJ2	CASSPDSGANVLTF	TGTGCCAGCAGCCCCGACTCTGGGGCCAACGTCCTGACTTTC	:::::::::0::12:::::10:17:42:::	CD4
667	TGTGCCAGCAGCCCCGCTAGGGGGGAGCAGTACTTC	TRBV7-6	TRBD2	TRBJ2-7	TRBV7	TRBJ2	CASSPARGEQYF	TGTGCCAGCAGCCCCGCTAGGGGGGAGCAGTACTTC	:::::::::0::12:12:::20:24::36:::	CD8
668	TGTGCCAGCAGCCCCGGACAGACCTACACCGGGGAGCTGTTTTTT	TRBV4-2	TRBD1	TRBJ2-2	TRBV4	TRBJ2	CASSPGQTYTGELFF	TGTGCCAGCAGCCCCGGACAGACCTACACCGGGGAGCTGTTTTTT	:::::::::0::13:15:::21:25::45:::	0
669	TGTGCCAGCAGCCCCGGACTAGCGGTGGATGAGACCCAGTACTTC	TRBV3-1	TRBD2	TRBJ2-5	TRBV3	TRBJ2	CASSPGLAVDETQYF	TGTGCCAGCAGCCCCGGACTAGCGGTGGATGAGACCCAGTACTTC	:::::::::0::13:15:::25:30::45:::	CD8
670	TGTGCCAGCAGCCCCGGAGGGGAAGCCTATGGCTACACCTTC	TRBV6-2	TRBD2	TRBJ1-2	TRBV6	TRBJ1	CASSPGGEAYGYTF	TGTGCCAGCAGCCCCGGAGGGGAAGCCTATGGCTACACCTTC	:::::::::0::11:15::21:21:26::42:::	CD8
671	TGTGCCAGCAGCCCCGGCTCAGGGGGCCGCGGCTACACCTTC	TRBV3-1	TRBD1	TRBJ1-2	TRBV3	TRBJ1	CASSPGSGGRGYTF	TGTGCCAGCAGCCCCGGCTCAGGGGGCCGCGGCTACACCTTC	:::::::::0::13:13:15:27:27:30::42:::	CD4
672	TGTGCCAGCAGCCCCGGGACAGCCTACGAGCAGTACTTC	TRBV7-2	TRBD1	TRBJ2-7	TRBV7	TRBJ2	CASSPGTAYEQYF	TGTGCCAGCAGCCCCGGGACAGCCTACGAGCAGTACTTC	:::::::::0::12:12:15::22:22::39:::	CD8
673	TGTGCCAGCAGCCCCGGGACAGCGAACACTGAAGCTTTCTTT	TRBV7-9	TRBD1	TRBJ1-1	TRBV7	TRBJ1	CASSPGTANTEAFF	TGTGCCAGCAGCCCCGGGACAGCGAACACTGAAGCTTTCTTT	:::::::::0::12:12:15::22:23::42:::	CD8
674	TGTGCCAGCAGCCCCGGGACAGGAAGACTGTTTTTT	TRBV3-1	TRBD1	TRBJ1-4	TRBV3	TRBJ1	CASSPGTGRLFF	TGTGCCAGCAGCCCCGGGACAGGAAGACTGTTTTTT	:::::::::0::13:13:15::23:23::36:::	CD4
675	TGTGCCAGCAGCCCCGGGACAGGGAACTATGGCTACACCTTC	TRBV7-6	TRBD1	TRBJ1-2	TRBV7	TRBJ1	CASSPGTGNYGYTF	TGTGCCAGCAGCCCCGGGACAGGGAACTATGGCTACACCTTC	:::::::::0::12:12:15::24:24::42:::	CD8
676	TGTGCCAGCAGCCCCGGGACAGGGGGCTACGAGCAGTACTTC	TRBV5-6	TRBD1	TRBJ2-7	TRBV5	TRBJ2	CASSPGTGGYEQYF	TGTGCCAGCAGCCCCGGGACAGGGGGCTACGAGCAGTACTTC	:::::::::0::12:12:15::26:26::42:::	CD8
677	TGTGCCAGCAGCCCCGGGACAGGGTACGAGCAGTACTTC	TRBV7-2	TRBD1	TRBJ2-7	TRBV7	TRBJ2	CASSPGTGYEQYF	TGTGCCAGCAGCCCCGGGACAGGGTACGAGCAGTACTTC	:::::::::0::12:12:15::24:24::39:::	CD8
678	TGTGCCAGCAGCCCCGGGACAGGTCTCAATCAGCCCCAGCATTTT	TRBV27	TRBD1	TRBJ1-5	TRBV27*00	TRBJ1	CASSPGTGLNQPQHF	TGTGCCAGCAGCCCCGGGACAGGTCTCAATCAGCCCCAGCATTTT	:::::::::0::11:12:15::23:26::45:::	CD8
679	TGTGCCAGCAGCCCCGGGACGGCTCAGCCGGCTGGAAACACCATATATTTT	TRBV9	TRBD1	TRBJ1-3	TRBV9*00	TRBJ1	CASSPGTAQPAGNTIYF	TGTGCCAGCAGCCCCGGGACGGCTCAGCCGGCTGGAAACACCATATATTTT	:::::::::0::12:12:15::20:31::51:::	CD8
680	TGTGCCAGCAGCCCCGGGACGGTCTCCTACGAGCAGTACTTC	TRBV6-2	TRBD1	TRBJ2-7	TRBV6	TRBJ2	CASSPGTVSYEQYF	TGTGCCAGCAGCCCCGGGACGGTCTCCTACGAGCAGTACTTC	:::::::::0::11:12:15::20:23:23:42:::	CD8
681	TGTGCCAGCAGCCCCGGGGACAGGCTATACAATGAGCAGTTCTTC	TRBV9	TRBD1	TRBJ2-1	TRBV9*00	TRBJ2	CASSPGDRLYNEQFF	TGTGCCAGCAGCCCCGGGGACAGGCTATACAATGAGCAGTTCTTC	:::::::::0::12:12:16::24:27::45:::	CD8
682	TGTGCCAGCAGCCCCGGGGACAGGTTATACAATGAGCAGTTCTTC	TRBV9	TRBD1	TRBJ2-1	TRBV9*00	TRBJ2	CASSPGDRLYNEQFF	TGTGCCAGCAGCCCCGGGGACAGGTTATACAATGAGCAGTTCTTC	:::::::::0::12:12:16::24:27::45:::	CD8
683	TGTGCCAGCAGCCCCGGGGCAGGGGCCACCTACGAGCAGTACGTC	TRBV9	TRBD1	TRBJ2-7	TRBV9*00	TRBJ2	CASSPGAGATYEQYV	TGTGCCAGCAGCCCCGGGGCAGGGGCCACCTACGAGCAGTACGTC	:::::::::0::12:12:15::25:28::45:::	CD8
684	TGTGCCAGCAGCCCCGGGGCGGCCTACGAGCAGTACTTC	TRBV7-2	TRBD1	TRBJ2-7	TRBV7	TRBJ2	CASSPGAAYEQYF	TGTGCCAGCAGCCCCGGGGCGGCCTACGAGCAGTACTTC	:::::::::0::12:12:15::18:22::39:::	CD8
685	TGTGCCAGCAGCCCCGGGGGACAGGGGACCTATGGCTACACCTTC	TRBV9	TRBD1	TRBJ1-2	TRBV9*00	TRBJ1	CASSPGGQGTYGYTF	TGTGCCAGCAGCCCCGGGGGACAGGGGACCTATGGCTACACCTTC	:::::::::0::12:17:17::27:29::45:::	CD8
686	TGTGCCAGCAGCCCCGGGGGAGCCTACGAGCAGTACTTC	TRBV3-1	TRBD1	TRBJ2-7	TRBV3	TRBJ2	CASSPGGAYEQYF	TGTGCCAGCAGCCCCGGGGGAGCCTACGAGCAGTACTTC	:::::::::0::13:13:15::18:22::39:::	CD8
687	TGTGCCAGCAGCCCCGGGTGGGCTAGCGGGGGGTCCTTCACAGATACGCAGTATTTT	TRBV11-2	TRBD2	TRBJ2-3	TRBV11	TRBJ2	CASSPGWASGGSFTDTQYF	TGTGCCAGCAGCCCCGGGTGGGCTAGCGGGGGGTCCTTCACAGATACGCAGTATTTT	:::::::::0::12:19:19:33:37:38::57:::	CD4
688	TGTGCCAGCAGCCCCGGTTGGGGAAACTATGGCTACACCTTC	TRBV28	TRBD1	TRBJ1-2	TRBV28*00	TRBJ1	CASSPGWGNYGYTF	TGTGCCAGCAGCCCCGGTTGGGGAAACTATGGCTACACCTTC	:::::::::0::11:12:15::17:24::42:::	CD8
689	TGTGCCAGCAGCCCCTCAGGGGGTGCCTATGGCTACACCTTC	TRBV6-1	TRBD1	TRBJ1-2	TRBV6	TRBJ1	CASSPSGGAYGYTF	TGTGCCAGCAGCCCCTCAGGGGGTGCCTATGGCTACACCTTC	:::::::::0::11:16::24:26:26::42:::	CD8
690	TGTGCCAGCAGCCCCTTTTCAGGGGAGGATACGCAGTATTTT	TRBV5-4	TRBD1	TRBJ2-3	TRBV5	TRBJ2	CASSPFSGEDTQYF	TGTGCCAGCAGCCCCTTTTCAGGGGAGGATACGCAGTATTTT	:::::::::0::12:19:::25:27::42:::	CD4
691	TGTGCCAGCAGCCCGAACCCCGGGGACAAGCTTTCTTT	TRBV9	TRBD1	TRBJ1-1	TRBV9*00	TRBJ1	CASSPN_RGQAFF	TGTGCCAGCAGCCCGAACCCCGGGGACAAGCTTTCTTT	:::::::::0::12:18:21::24:27::38:::	CD8
692	TGTGCCAGCAGCCCGACAGCTAACAATGAGCAGTTCTTC	TRBV12-4	TRBD1	TRBJ2-1	TRBV12	TRBJ2	CASSPTANNEQFF	TGTGCCAGCAGCCCGACAGCTAACAATGAGCAGTTCTTC	:::::::::0::11:14:::19:22::39:::	CD8
693	TGTGCCAGCAGCCCGACAGGGTTGAACACTGAAGCTTTCTTT	TRBV7-9	TRBD1	TRBJ1-1	TRBV7	TRBJ1	CASSPTGLNTEAFF	TGTGCCAGCAGCCCGACAGGGTTGAACACTGAAGCTTTCTTT	:::::::::0::12:14:::21:22:22:42:::	CD4
694	TGTGCCAGCAGCCCGACTAGCACCGGGGAGCTGTTTTTT	TRBV7-3	TRBD2	TRBJ2-2	TRBV7	TRBJ2	CASSPTSTGELFF	TGTGCCAGCAGCCCGACTAGCACCGGGGAGCTGTTTTTT	:::::::::0::12:14:::20:20::39:::	CD4
695	TGTGCCAGCAGCCCGGAATCTAGCGGGGGGGACAATGAGCAGTTCTTC	TRBV4-2	TRBD2	TRBJ2-1	TRBV4	TRBJ2	CASSPESSGGDNEQFF	TGTGCCAGCAGCCCGGAATCTAGCGGGGGGGACAATGAGCAGTTCTTC	:::::::::0::13:19::31:31:31::48:::	CD8
696	TGTGCCAGCAGCCCGGACAGTAACACTGAAGCTTTCTTT	TRBV7-2	TRBD1	TRBJ1-1	TRBV7	TRBJ1	CASSPDSNTEAFF	TGTGCCAGCAGCCCGGACAGTAACACTGAAGCTTTCTTT	:::::::::0::12:14:::20:21::39:::	CD4
697	TGTGCCAGCAGCCCGGACTTGATGGATACGCAGTATTTT	TRBV5-8	TRBD2	TRBJ2-3	TRBV5	TRBJ2	CASSPDLMDTQYF	TGTGCCAGCAGCCCGGACTTGATGGATACGCAGTATTTT	:::::::::0::12:14:::19:24::39:::	CD4
698	TGTGCCAGCAGCCCGGCAACTAATGAAAAACTGTTTTTT	TRBV4-2		TRBJ1-4	TRBV4	TRBJ1	CASSPATNEKLFF	TGTGCCAGCAGCCCGGCAACTAATGAAAAACTGTTTTTT	:::::::::0::13:::::15:16:39:::	CD4
699	TGTGCCAGCAGCCCGGCAGGGGGCTACGAGCAGTACGTC	TRBV11-2	TRBD1	TRBJ2-7	TRBV11	TRBJ2	CASSPAGGYEQYV	TGTGCCAGCAGCCCGGCAGGGGGCTACGAGCAGTACGTC	:::::::::0::12:16:::23:23::39:::	CD8
700	TGTGCCAGCAGCCCGGCCGACAGACTCACTGAAGCTTTCTTT	TRBV9	TRBD1	TRBJ1-1	TRBV9*00	TRBJ1	CASSPADRLTEAFF	TGTGCCAGCAGCCCGGCCGACAGACTCACTGAAGCTTTCTTT	:::::::::0::12:18:::23:26::42:::	CD8
701	TGTGCCAGCAGCCCGGCGAGGGCGTACGAGCAGTACTTC	TRBV7-2	TRBD2	TRBJ2-7	TRBV7	TRBJ2	CASSPARAYEQYF	TGTGCCAGCAGCCCGGCGAGGGCGTACGAGCAGTACTTC	:::::::::0::12:13::22:23:24::39:::	CD8
702	TGTGCCAGCAGCCCGGCGGGGGGGTACGAGCAGTACTTC	TRBV7-2	TRBD2	TRBJ2-7	TRBV7	TRBJ2	CASSPAGGYEQYF	TGTGCCAGCAGCCCGGCGGGGGGGTACGAGCAGTACTTC	:::::::::0::12:15::24:24:24::39:::	CD8
703	TGTGCCAGCAGCCCGGCTAGCGCCGAGGGTTACGAGCAGTACTTC	TRBV6-5	TRBD2	TRBJ2-7	TRBV6	TRBJ2	CASSPASAEGYEQYF	TGTGCCAGCAGCCCGGCTAGCGCCGAGGGTTACGAGCAGTACTTC	:::::::::0::11:11:14:29:29:30::45:::	CD8
704	TGTGCCAGCAGCCCGGGACAGGGGGCCTACGAGCAGTACTTC	TRBV9	TRBD1	TRBJ2-7	TRBV9*00	TRBJ2	CASSPGQGAYEQYF	TGTGCCAGCAGCCCGGGACAGGGGGCCTACGAGCAGTACTTC	:::::::::0::12:12:14::25:25::42:::	CD8
705	TGTGCCAGCAGCCCGGGACCGGTAAACACTGAAGCTTTCTTT	TRBV12-4	TRBD1	TRBJ1-1	TRBV12	TRBJ1	CASSPGPVNTEAFF	TGTGCCAGCAGCCCGGGACCGGTAAACACTGAAGCTTTCTTT	:::::::::0::11:11:14::22:24::42:::	CD8
706	TGTGCCAGCAGCCCGGGACTAGCCTTTGAGACCCAGTACTTC	TRBV7-2	TRBD2	TRBJ2-5	TRBV7	TRBJ2	CASSPGLAFETQYF	TGTGCCAGCAGCCCGGGACTAGCCTTTGAGACCCAGTACTTC	:::::::::0::12:12:14::23:27::42:::	CD4
707	TGTGCCAGCAGCCCGGGACTAGCTTACGAGCAGTACTTC	TRBV7-2	TRBD2	TRBJ2-7	TRBV7	TRBJ2	CASSPGLAYEQYF	TGTGCCAGCAGCCCGGGACTAGCTTACGAGCAGTACTTC	:::::::::0::12:12:14::23:24::39:::	CD8
708	TGTGCCAGCAGCCCGGGGCCCTACACAGATACGCAGTATTTT	TRBV7-3	TRBD1	TRBJ2-3	TRBV7	TRBJ2	CASSPGPYTDTQYF	TGTGCCAGCAGCCCGGGGCCCTACACAGATACGCAGTATTTT	:::::::::0::12:12:14::17:20:22:42:::	CD4
709	TGTGCCAGCAGCCCGGGGGAAGGAACGAACTATGGCTACACCTTC	TRBV9	TRBD1	TRBJ1-2	TRBV9*00	TRBJ1	CASSPGEGTNYGYTF	TGTGCCAGCAGCCCGGGGGAAGGAACGAACTATGGCTACACCTTC	:::::::::0::12:12:14::17:27::45:::	CD8
710	TGTGCCAGCAGCCCGGGGGAGGGGGCTCTCTACAATGAGCAGTTCTTC	TRBV9	TRBD1	TRBJ2-1	TRBV9*00	TRBJ2	CASSPGEGALYNEQFF	TGTGCCAGCAGCCCGGGGGAGGGGGCTCTCTACAATGAGCAGTTCTTC	:::::::::0::12:12:14::17:21:25:48:::	CD8
711	TGTGCCAGCAGCCCGGGGGATGGGCCCTACAATGAGCAGTTCTTC	TRBV4-2	TRBD2	TRBJ2-1	TRBV4	TRBJ2	CASSPGDGPYNEQFF	TGTGCCAGCAGCCCGGGGGATGGGCCCTACAATGAGCAGTTCTTC	:::::::::0::13:16::24:25:25::45:::	CD8
712	TGTGCCAGCAGCCCGGGGGGCCCTCTCTACAATGAGCAGTTCTTC	TRBV9	TRBD2	TRBJ2-1	TRBV9*00	TRBJ2	CASSPGGPLYNEQFF	TGTGCCAGCAGCCCGGGGGGCCCTCTCTACAATGAGCAGTTCTTC	:::::::::0::12:13::20:22:22:22:45:::	CD8
713	TGTGCCAGCAGCCCGGGGGGGGCCTACGAGCAGTACTTC	TRBV7-8	TRBD2	TRBJ2-7	TRBV7	TRBJ2	CASSPGGAYEQYF	TGTGCCAGCAGCCCGGGGGGGGCCTACGAGCAGTACTTC	:::::::::0::12:13::21:21:22::39:::	CD8
714	TGTGCCAGCAGCCCGTACCGGTACGGGGGGCAAGAGACCCAGTACTTC	TRBV5-6	TRBD1	TRBJ2-5	TRBV5	TRBJ2	CASSPYRYGGQETQYF	TGTGCCAGCAGCCCGTACCGGTACGGGGGGCAAGAGACCCAGTACTTC	:::::::::0::12:14:19::30:30::48:::	CD4
715	TGTGCCAGCAGCCCGTACGGGGCCTACGTAGATACGCAGTATTTT	TRBV7-9	TRBD1	TRBJ2-3	TRBV7	TRBJ2	CASSPYGAYVDTQYF	TGTGCCAGCAGCCCGTACGGGGCCTACGTAGATACGCAGTATTTT	:::::::::0::12:18::23:23:29::45:::	CD4
716	TGTGCCAGCAGCCCTAACCCCCATTTCTCCTATAATTCACCCCTCCACTTT	TRBV12-4	TRBD1	TRBJ1-6	TRBV12	TRBJ1	CASSPNPHFSYNSPLHF	TGTGCCAGCAGCCCTAACCCCCATTTCTCCTATAATTCACCCCTCCACTTT	:::::::::0::11:17:::22:26:26:51:::	CD8
717	TGTGCCAGCAGCCCTAGCGGGGCTCTAAATACGCAGTATTTT	TRBV7-2		TRBJ2-3	TRBV7	TRBJ2	CASSPSGALNTQYF	TGTGCCAGCAGCCCTAGCGGGGCTCTAAATACGCAGTATTTT	:::::::::0:18:19:::::28::42:::	CD4
718	TGTGCCAGCAGCCCTAGGAGGACTAGCACAGATACGCAGTATTTT	TRBV7-3	TRBD2	TRBJ2-3	TRBV7	TRBJ2	CASSPRRTSTDTQYF	TGTGCCAGCAGCCCTAGGAGGACTAGCACAGATACGCAGTATTTT	:::::::::0::12:16:::21:22:24:45:::	CD4
719	TGTGCCAGCAGCCCTCGGGACAGAATTAATTCACCCCTCCACTTT	TRBV9	TRBD1	TRBJ1-6	TRBV9*00	TRBJ1	CASSPRDRINSPLHF	TGTGCCAGCAGCCCTCGGGACAGAATTAATTCACCCCTCCACTTT	:::::::::0::12:15:16::23:26::45:::	CD8
720	TGTGCCAGCAGCCCTCGGGACAGACTGAACACTGAAGCTTTCTTT	TRBV9	TRBD1	TRBJ1-1	TRBV9*00	TRBJ1	CASSPRDRLNTEAFF	TGTGCCAGCAGCCCTCGGGACAGACTGAACACTGAAGCTTTCTTT	:::::::::0::12:15:16::23:25:25:45:::	CD8
721	TGTGCCAGCAGCCCTCGGTTAGCGGGGGGGGATGAGCAGTTCTTC	TRBV7-3	TRBD2	TRBJ2-1	TRBV7	TRBJ2	CASSPRLAGGDEQFF	TGTGCCAGCAGCCCTCGGTTAGCGGGGGGGGATGAGCAGTTCTTC	:::::::::0::12:19::30:30:31::45:::	CD4
722	TGTGCCAGCAGCCCTCTCAGCGGGGGGAACACCGGGGAGCTGTTTTTT	TRBV4-2	TRBD2	TRBJ2-2	TRBV4	TRBJ2	CASSPLSGGNTGELFF	TGTGCCAGCAGCCCTCTCAGCGGGGGGAACACCGGGGAGCTGTTTTTT	:::::::::0::13:18:::24:26::48:::	CD8
723	TGTGCCAGCAGCCCTGCCCCCGCGTACGAGCAGTACTTC	TRBV7-2	TRBD1	TRBJ2-7	TRBV7	TRBJ2	CASSPAPAYEQYF	TGTGCCAGCAGCCCTGCCCCCGCGTACGAGCAGTACTTC	:::::::::0::12:15:::21:24::39:::	CD8
724	TGTGCCAGCAGCCCTGGCGGACGGATTTACAATGAGCAGTTCTTC	TRBV9		TRBJ2-1	TRBV9*00	TRBJ2	CASSPGGRIYNEQFF	TGTGCCAGCAGCCCTGGCGGACGGATTTACAATGAGCAGTTCTTC	:::::::::0::12:::::27::45:::	CD8
725	TGTGCCAGCAGCCCTGGGGAGCGACTATACAATGAGCAGTTCTTC	TRBV9	TRBD2	TRBJ2-1	TRBV9*00	TRBJ2	CASSPGERLYNEQFF	TGTGCCAGCAGCCCTGGGGAGCGACTATACAATGAGCAGTTCTTC	:::::::::0::12:22:::27:27::45:::	CD8
726	TGTGCCAGCAGCCCTGGGGGGCGCGGGGGGGCCTGGGATACGCAGTATTTT	TRBV7-2	TRBD2	TRBJ2-3	TRBV7	TRBJ2	CASSPGGRGGAWDTQYF	TGTGCCAGCAGCCCTGGGGGGCGCGGGGGGGCCTGGGATACGCAGTATTTT	:::::::::0::12:22::31:33:36::51:::	CD8
727	TGTGCCAGCAGCCCTGGTGGGACAGGGACCTACGAGCAGTACTTC	TRBV27	TRBD1	TRBJ2-7	TRBV27*00	TRBJ2	CASSPGGTGTYEQYF	TGTGCCAGCAGCCCTGGTGGGACAGGGACCTACGAGCAGTACTTC	:::::::::0::11:18:18::27:28::45:::	CD8
728	TGTGCCAGCAGCCCTTATAATTCACCCCTCCACTTT	TRBV7-2		TRBJ1-6	TRBV7	TRBJ1	CASSPYNSPLHF	TGTGCCAGCAGCCCTTATAATTCACCCCTCCACTTT	:::::::::0::12:::::6:11:36:::	CD4
729	TGTGCCAGCAGCCCTTATGATCAGCCCCAGCATTTT	TRBV7-2		TRBJ1-5	TRBV7	TRBJ1	CASSPYDQPQHF	TGTGCCAGCAGCCCTTATGATCAGCCCCAGCATTTT	:::::::::0::12:::::19::36:::	CD4
730	TGTGCCAGCAGCCGAACCGGGCCAAACACTGAAGCTTTCTTT	TRBV12-4	TRBD1	TRBJ1-1	TRBV12	TRBJ1	CASSRTGPNTEAFF	TGTGCCAGCAGCCGAACCGGGCCAAACACTGAAGCTTTCTTT	:::::::::0::11:16:18::24:24::42:::	CD8
731	TGTGCCAGCAGCCGAAGCGCAGCGGGGGGCACTAGCACAGATACGCAGTATTTT	TRBV3-1	TRBD2	TRBJ2-3	TRBV3	TRBJ2	CASSRSAAGGTSTDTQYF	TGTGCCAGCAGCCGAAGCGCAGCGGGGGGCACTAGCACAGATACGCAGTATTTT	:::::::::0::17:20::29:30:31:33:54:::	CD8
732	TGTGCCAGCAGCCGACAGGCGTCGGGGAACACTGAAGCTTTCTTT	TRBV6-1	TRBD1	TRBJ1-1	TRBV6	TRBJ1	CASSRQASGNTEAFF	TGTGCCAGCAGCCGACAGGCGTCGGGGAACACTGAAGCTTTCTTT	:::::::::0::11:13:::19:26::45:::	CD4
733	TGTGCCAGCAGCCGACAGGGAGGGTACGAGCAGTACTTC	TRBV12-4	TRBD1	TRBJ2-7	TRBV12	TRBJ2	CASSRQGGYEQYF	TGTGCCAGCAGCCGACAGGGAGGGTACGAGCAGTACTTC	:::::::::0::11:13:::20:24::39:::	CD8
734	TGTGCCAGCAGCCGACAGGGGTTTCGCACTGAAGCTTTCTTT	TRBV12-4	TRBD1	TRBJ1-1	TRBV12	TRBJ1	CASSRQGFRTEAFF	TGTGCCAGCAGCCGACAGGGGTTTCGCACTGAAGCTTTCTTT	:::::::::0::11:13:::21:26::42:::	CD4
735	TGTGCCAGCAGCCGACCGGACACAAACACTGAAGCTTTCTTT	TRBV5-4	TRBD1	TRBJ1-1	TRBV5	TRBJ1	CASSRPDTNTEAFF	TGTGCCAGCAGCCGACCGGACACAAACACTGAAGCTTTCTTT	:::::::::0::12:17:::22:24::42:::	CD4
736	TGTGCCAGCAGCCGACTGGGACGAACTAATGAAAAACTGTTTTTT	TRBV4-2	TRBD1	TRBJ1-4	TRBV4	TRBJ1	CASSRLGRTNEKLFF	TGTGCCAGCAGCCGACTGGGACGAACTAATGAAAAACTGTTTTTT	:::::::::0::13:17:17::22:23::45:::	CD4
737	TGTGCCAGCAGCCGAGGCCCGGGACAGGCCTACGAGCAGTACTTC	TRBV3-1	TRBD1	TRBJ2-7	TRBV3	TRBJ2	CASSRGPGQAYEQYF	TGTGCCAGCAGCCGAGGCCCGGGACAGGCCTACGAGCAGTACTTC	:::::::::0::16:17:20::28:28::45:::	CD8
738	TGTGCCAGCAGCCGAGGCCGGAACACTGAAGCTTTCTTT	TRBV13		TRBJ1-1	TRBV13*00	TRBJ1	CASSRGRNTEAFF	TGTGCCAGCAGCCGAGGCCGGAACACTGAAGCTTTCTTT	:::::::::0:17:19:::::20::39:::	CD8
739	TGTGCCAGCAGCCGAGGGGAGGGGCGAAACTACAATGAGCAGTTCTTC	TRBV9	TRBD2	TRBJ2-1	TRBV9*00	TRBJ2	CASSRGEGRNYNEQFF	TGTGCCAGCAGCCGAGGGGAGGGGCGAAACTACAATGAGCAGTTCTTC	:::::::::0::12:16::23:23:29::48:::	CD8
740	TGTGCCAGCAGCCGAGGGTCGGTGAGAGAGCAGTACTTC	TRBV27	TRBD2	TRBJ2-7	TRBV27*00	TRBJ2	CASSRGSVREQYF	TGTGCCAGCAGCCGAGGGTCGGTGAGAGAGCAGTACTTC	:::::::::0::11:13::18:18:27::39:::	CD8
741	TGTGCCAGCAGCCGATACGCCCGGGGGGGGCAGAACACCGGGGAGCTGTTTTTT	TRBV7-6	TRBD1	TRBJ2-2	TRBV7	TRBJ2	CASSRYARGGQNTGELFF	TGTGCCAGCAGCCGATACGCCCGGGGGGGGCAGAACACCGGGGAGCTGTTTTTT	:::::::::0::12:19:22::25:32::54:::	CD4
742	TGTGCCAGCAGCCGCCCGCCGGGGGTCAGAGAGACCCAGTACTTC	TRBV3-1	TRBD1	TRBJ2-5	TRBV3	TRBJ2	CASSRPPGVRETQYF	TGTGCCAGCAGCCGCCCGCCGGGGGTCAGAGAGACCCAGTACTTC	:::::::::0::13:18:20::23:29::45:::	CD4
743	TGTGCCAGCAGCCGCCCTTGGGGCCTCTACAATGAGCAGTTCTTC	TRBV28	TRBD1	TRBJ2-1	TRBV28*00	TRBJ2	CASSRPWGLYNEQFF	TGTGCCAGCAGCCGCCCTTGGGGCCTCTACAATGAGCAGTTCTTC	:::::::::0::11:19::24:24:26::45:::	CD4
744	TGTGCCAGCAGCCGCGACACAGATACGCAGTATTTT	TRBV7-3		TRBJ2-3	TRBV7	TRBJ2	CASSRDTDTQYF	TGTGCCAGCAGCCGCGACACAGATACGCAGTATTTT	:::::::::0::12:::::17::36:::	CD4
745	TGTGCCAGCAGCCGCGGCGGGGCACCCTACAATGAGCAGTTCTTC	TRBV7-3	TRBD1	TRBJ2-1	TRBV7	TRBJ2	CASSRGGAPYNEQFF	TGTGCCAGCAGCCGCGGCGGGGCACCCTACAATGAGCAGTTCTTC	:::::::::0::12:18::23:23:25::45:::	CD8
746	TGTGCCAGCAGCCGCGGGACTAGCGGACCCAATGAGCAGTTCTTC	TRBV14	TRBD2	TRBJ2-1	TRBV14*00	TRBJ2	CASSRGTSGPNEQFF	TGTGCCAGCAGCCGCGGGACTAGCGGACCCAATGAGCAGTTCTTC	:::::::::0::13:14:15::26:29::45:::	CD4
747	TGTGCCAGCAGCCGCTACCAAGAGACCCAGTACTTC	TRBV7-2		TRBJ2-5	TRBV7	TRBJ2	CASSRYQETQYF	TGTGCCAGCAGCCGCTACCAAGAGACCCAGTACTTC	:::::::::0::12:::::15:16:36:::	CD4
748	TGTGCCAGCAGCCGGGACAGCTACACAGATACGCAGTATTTT	TRBV7-2	TRBD1	TRBJ2-3	TRBV7	TRBJ2	CASSRDSYTDTQYF	TGTGCCAGCAGCCGGGACAGCTACACAGATACGCAGTATTTT	:::::::::0::12:12:13::19:19:22:42:::	CD4
749	TGTGCCAGCAGCCGGGACGGCTACGAGCAGTACTTC	TRBV4-2	TRBD1	TRBJ2-7	TRBV4	TRBJ2	CASSRDGYEQYF	TGTGCCAGCAGCCGGGACGGCTACGAGCAGTACTTC	:::::::::0::13:13:13::18:20::36:::	CD4
750	TGTGCCAGCAGCCGGGGAATTACCCAAACCTACGAGCAGTACTTC	TRBV3-1		TRBJ2-7	TRBV3	TRBJ2	CASSRGITQTYEQYF	TGTGCCAGCAGCCGGGGAATTACCCAAACCTACGAGCAGTACTTC	:::::::::0::13:::::28::45:::	CD8
[truncated: 830 more rows]

## Sheet: edgeR TCRalpha donor P30
	CDR3.nucleotide.sequence	bestVGene	bestDGene	bestJGene	bestVFamily	bestJFamily	CDR3.amino.acid.sequence	nSeqCDR3	refPoints	phen
[truncated: 201 more rows]

[truncated: 1 more sheets: edgeR TCRbeta donor P30]
