# Supplementary material for: Primary and secondary anti-viral response captured by the dynamics and phenotype of individual T cell clones
Source: eLife journal article supplement (doi:10.7554/elife.53704), 2020-02-21
Supplement: supp [file elife-53704-supp-v1.zip › elife_poa_e53704_Figure_2_source_data_1.xlsx]

## Sheet: Fig2_source1(2A left)
CDR3	max	variable	value	id	phen
TGTGCCAGCAGCCCCGGGACAGGGGGCTACGAGCAGTACTTC	peak15	M1_0_F1	4.1e-06	1	CD8
TGTGCCAGCAGCGCGGACTCTGGGGCCAACGTCCTGACTTTC	peak15	M1_0_F1	0	2	CD4
TGTGCCAGCAGCTTAGATGCTGGGGCCAACGTCCTGACTTTC	peak15	M1_0_F1	0	3	CD4
TGTGCCAGCAGTCCCGGGACAGCCTACGAGCAGTACTTC	peak15	M1_0_F1	1.03e-06	4	CD8
TGTGCCAGCAGCCCCGACTCTGGGGCCAACGTCCTGACTTTC	peak15	M1_0_F1	0	5	CD4
TGTGCCAGCAGCCCCGGGACAGCGAACACTGAAGCTTTCTTT	peak21	M1_0_F1	0	6	CD8
TGTGCCAGCAGCCGCGACACAGATACGCAGTATTTT	peak15	M1_0_F1	0	7	CD4
TGTGCCAGCAGCGATAACTATGGCTACACCTTC	peak21	M1_0_F1	0	8	CD4
TGTGCCAGCAGCGGACAGGGGGCCTACGAGCAGTACTTC	peak15	M1_0_F1	0	9	CD8
TGTGCCAGCAGCTTAGTCAACTATGGCTACACCTTC	peak15	M1_0_F1	1.03e-06	10	CD8
TGTGCCAGCAGCTTCGGGACGGTGAACACTGAAGCTTTCTTT	peak15	M1_0_F1	4.1e-06	11	CD4
TGTGCCAGCAGCTTGACAGGGAACAATGAGCAGTTCTTC	peak21	M1_0_F1	0	12	CD8
TGTGCCAGCAGTCCGACAGGGGCCTATGGCTACACCTTC	peak15	M1_0_F1	0	13	CD8
TGTGCCAGCAGTTACAGGGGAGGCACTGAAGCTTTCTTT	peak15	M1_0_F1	0	14	CD8
TGTGCCAGCAGTTTAGGGGGCACTGAAGCTTTCTTT	peak15	M1_0_F1	0	15	CD8
TGTGCCAGCTCACAGGGGGCAGAGACCCAGTACTTC	peak10	M1_0_F1	0	16	CD8
TGTGCCATCAGTGACGGCGGACAAGAGACCCAGTACTTC	peak21	M1_0_F1	0	17	CD8
TGTGCCATCAGTGAGTCGCAAGAGACCCAGTACTTC	peak15	M1_0_F1	1.03e-06	18	CD4
TGCACCAGCAGCCCTACATCATACTGGAATGAAAAACTGTTTTTT	peak10	M1_0_F1	0	19	CD8
TGCAGACGGGGGGGCGCAGATACGCAGTATTTT	peak15	M1_0_F1	0	20	CD8
TGCAGCATATCGGACAGGGGGCTCACCGGGGAGCTGTTTTTT	peak15	M1_0_F1	0	21	CD8
TGCAGCGCACCACTAGCGGGGGGGAACAATGAGCAGTTCTTC	peak15	M1_0_F1	0	22	CD8
TGCAGCGCACTCGAGGGCTATGGCTACACCTTC	peak15	M1_0_F1	0	23	CD8
TGCAGCGCCCCACTAGCGGGGGGAGGGAATGAGCAGTTCTTC	peak15	M1_0_F1	0	24	CD8
TGCAGCGCTTCCCCCGCCAGCTACAATGAGCAGTTCTTC	peak10	M1_0_F1	0	25	CD4
TGCAGCGGTTGGAAGTCGGGGGAATTCTACGAGCAGTACGTC	peak15	M1_0_F1	0	26	CD4
TGCAGCGTAAACAGGGGGATAGGGAACACTGAAGCTTTCTTT	peak15	M1_0_F1	0	27	CD8
TGCAGCGTCACAACAGGGATCAGCTACGAGCAGTACTTC	peak15	M1_0_F1	0	28	CD8
TGCAGCGTCACAGCACCAGCTAACTATGGCTACACCTTC	peak10	M1_0_F1	0	29	CD4
TGCAGCGTCCCCCTGGGCGGTGGAGCCAATGAGCAGTTCTTC	peak15	M1_0_F1	0	30	CD8
TGCAGCGTCCCTCTAAGCGGGGGGGGTAATGAGCAGTTCTTC	peak15	M1_0_F1	0	31	CD8
TGCAGCGTCGGGATGACTAGCGGGGCCGAGGGGACCCAGTACTTC	peak15	M1_0_F1	0	32	CD4
TGCAGCGTCTCCCTAAACGCGGGAAACACTGAAGCTTTCTTT	peak15	M1_0_F1	0	33	CD4
TGCAGCGTGCAGGACATAGACACAGATACGCAGTATTTT	peak15	M1_0_F1	0	34	CD4
TGCAGCGTGGGGGGGACTAGCGGACGGGGTACAGATACGCAGTATTTT	peak21	M1_0_F1	0	35	CD8
TGCAGCGTTGAAGATTTTCCCACTGAAGCTTTCTTT	peak10	M1_0_F1	0	36	CD8
TGCAGCGTTGAAGCGCACAGGGGCACCGGGGAGCTGTTTTTT	peak10	M1_0_F1	1.03e-06	37	CD4
TGCAGCGTTGACAGGAGGTCTGATGAAGCTTTCTTT	peak15	M1_0_F1	0	38	CD8
TGCAGCGTTGGAGAGCCGACCCCTTATGGCTACACCTTC	peak10	M1_0_F1	0	40	CD4
TGCAGCGTTGGAGGCGGGGTAAAGTGGGGCTACACCTTC	peak10	M1_0_F1	0	41	CD4
TGCAGCGTTGGGGAGGGGGTTGCCTACGAGCAGTACTTC	peak10	M1_0_F1	0	42	CD8
TGCAGCGTTGTCGTCTCGAGGGGGGAAGAGACCCAGTACTTC	peak15	M1_0_F1	0	43	CD4
TGCAGCGTTTGGGACACAACTAACTATGGCTACACCTTC	peak21	M1_0_F1	0	44	CD4
TGCAGTGAAAAGGGGGGGAGCTCCTACGAGCAGTACGTC	peak15	M1_0_F1	0	45	CD8
TGCAGTGCAACGGGGAACCGGGGCACAGATACGCAGTATTTT	peak15	M1_0_F1	0	46	CD8
TGCAGTGCAGCGGGCCAGCGGGGGGCAGATACGCAGTATTTT	peak15	M1_0_F1	0	47	CD8
TGCAGTGCCAACAGGGGAGCCACTGAAGCTTTCTTT	peak15	M1_0_F1	0	49	CD8
TGCAGTGCCCCCCAGGGGACCGGGGGGCACGACACTGAAGCTTTCTTT	peak21	M1_0_F1	0	50	CD4
TGCAGTGCCCCCCGGCGGCAGGATGAGCAGTTCTTC	peak15	M1_0_F1	0	51	CD8
TGCAGTGCCCCCGACAGGGAATCGGCGTTAAGGGAGACCCAGTACTTC	peak21	M1_0_F1	0	52	CD8
TGCAGTGCCCCCGTGTACAGGGGTGCAGATACGCAGTATTTT	peak15	M1_0_F1	0	53	CD8
TGCAGTGCCCCGACTAGCGGGGGGGACAATGAGCAGTTCTTC	peak10	M1_0_F1	0	54	CD8
TGCAGTGCCCCGAGACGGACGGATGAGCAGTTCTTC	peak15	M1_0_F1	0	55	CD8
TGCAGTGCCCCGCCCCCGGGAGGACAGAGCTCCTACAATGAGCAGTTCTTC	peak15	M1_0_F1	0	56	CD4
TGCAGTGCCCCGCCCGCAACTAGCGGGGGAACAACACAAGAGACCCAGTACTTC	peak15	M1_0_F1	0	57	CD4
TGCAGTGCCCCGTCCGGAGGGGGCCTTAATGAGCAGTTCTTC	peak21	M1_0_F1	0	58	CD8
TGCAGTGCCCCTCTAGCGGGGGGGGGGAATGAGCAGTTCTTC	peak15	M1_0_F1	0	59	CD8
TGCAGTGCCCTAGGAAAGCGGGGCACAGATACGCAGTATTTT	peak15	M1_0_F1	0	60	CD8
TGCAGTGCCCTCGGGGGGGAAGCGTACGAGCAGTACTTC	peak15	M1_0_F1	0	61	CD4
TGCAGTGCCGCTATGGGGCAGTACGTC	peak10	M1_0_F1	0	62	CD8
TGCAGTGCCGGGACAGCGGCAACTAATGAAAAACTGTTTTTT	peak15	M1_0_F1	0	63	CD8
TGCAGTGCCGGGTTGGGCCTCCCCTACGAGCAGTACTTC	peak15	M1_0_F1	0	64	CD8
TGCAGTGCCGTCCTTCCGGGACTAGCGGGTTACAATGAGCAGTTCTTC	peak15	M1_0_F1	0	65	CD8
TGCAGTGCCTTAGGAGCCCATTTAAATGAAAAACTGTTTTTT	peak15	M1_0_F1	0	66	CD8
TGCAGTGCGATGACTAGCTCGTGGCAGACCCAGTACTTC	peak21	M1_0_F1	0	67	CD4
TGCAGTGCGCCTGACAGGGGGCTTAGGAGCTACACCTTC	peak21	M1_0_F1	0	68	CD4
TGCAGTGCGGCAAGGGGACAGGGGAGCAGCGATGAGCAGTTCTTC	peak15	M1_0_F1	0	69	CD4
TGCAGTGCTAAATTATCCTCAGGGATTAGCAATCAGCCCCAGCATTTT	peak15	M1_0_F1	0	70	CD4
TGCAGTGCTAACCGGGACCTAGGGGTAAACACCATATATTTT	peak15	M1_0_F1	0	71	CD4
TGCAGTGCTACCTCATGGGGGAGCTCCTACAATGAGCAGTTCTTC	peak5	M1_0_F1	0	72	CD8
TGCAGTGCTACCTCCCTGGACAGGGAACCTTTATCACTGGGCAATGAGCAGTTCTTC	peak15	M1_0_F1	0	73	CD8
TGCAGTGCTACTCGACTAGCGGGGGGGTCTTACAATGAGCAGTTCTTC	peak10	M1_0_F1	0	74	CD4
TGCAGTGCTAGAAGCTCCGGGACAGGGGCTGGAAACACCATATATTTT	peak15	M1_0_F1	0	75	CD4
TGCAGTGCTAGAGAAGACTTGACAGGGACCTACAATGAGCAGTTCTTC	peak15	M1_0_F1	0	77	CD8
TGCAGTGCTAGAGACCGGGACAGGGACTACAATGAGCAGTTCTTC	peak15	M1_0_F1	0	78	CD8
TGCAGTGCTAGAGACTTCATCCGCACAGATACGCAGTATTTT	peak15	M1_0_F1	9.23e-06	79	CD8
TGCAGTGCTAGAGATGAGGGTTCTAACACCATATATTTT	peak15	M1_0_F1	0	81	CD8
TGCAGTGCTAGAGATTACGGCAGAGCCATATATGGCTACACCTTC	peak15	M1_0_F1	0	82	CD4
TGCAGTGCTAGAGCACAGGGGGACTATGGCTACACCTTC	peak15	M1_0_F1	0	83	CD4
TGCAGTGCTAGAGGACTAGCGGGGGCCTTAGGCGTTGGCGAGCAGTACTTC	peak21	M1_0_F1	0	84	CD8
TGCAGTGCTAGAGGGGGACAGGGGGCTCCAGGGTGGTCCTACAATGAGCAGTTCTTC	peak10	M1_0_F1	0	85	CD4
TGCAGTGCTAGATTCGGCGGTGCCACAGATACGCAGTATTTT	peak15	M1_0_F1	0	86	CD4
TGCAGTGCTAGCACACAGGGAGCTTACGAGCAGTACGTC	peak15	M1_0_F1	0	87	CD8
TGCAGTGCTAGCCAGGCCGCGGCCTACGAGCAGTACTTC	peak15	M1_0_F1	0	88	CD8
TGCAGTGCTAGCCTTAGCGGGGGGGCCGGGGGTGAGCAGTTCTTC	peak15	M1_0_F1	0	89	CD8
TGCAGTGCTAGCGGAAGACTAGACGGATCCTACGAGCAGTACTTC	peak15	M1_0_F1	0	90	CD8
TGCAGTGCTAGCGTGTGGGGGGGCCCCGGGGAGCTGTTTTTT	peak15	M1_0_F1	1.23e-05	91	CD4
TGCAGTGCTAGGCCCGACAGCAGCTCCTACGAGCAGTACTTC	peak15	M1_0_F1	0	92	CD4
TGCAGTGCTAGGGCTAGCGGGGGCCCTGTCCCATACACAGATACGCAGTATTTT	peak10	M1_0_F1	0	93	CD4
TGCAGTGCTAGGGCTTGGGGAGGGGGCGGTAGAATAGATGGAAACACCATATATTTT	peak15	M1_0_F1	0	94	CD8
TGCAGTGCTAGGGGGGCTAGCACCGGGGGCACCGGGGAGCTGTTTTTT	peak10	M1_0_F1	0	95	CD4
TGCAGTGCTAGGGTAGGACAGGGGCCTTCAGATACGCAGTATTTT	peak15	M1_0_F1	0	96	CD4
TGCAGTGCTAGGTTCGCACAGGGTACCAATGAGCAGTTCTTC	peak15	M1_0_F1	0	97	CD4
TGCAGTGCTAGTGAAGGGACTAGCGGGGGGGCGTACGAGCAGTACGTC	peak21	M1_0_F1	0	98	CD8
TGCAGTGCTAGTGAGGGAACTTCCTACGAGCAGTACTTC	peak15	M1_0_F1	0	99	CD8
TGCAGTGCTATCCTAGCGGGGAATCAAGAGACCCAGTACTTC	peak15	M1_0_F1	0	100	CD4
TGCAGTGCTCCACGGACACCAGGGCCAGACAATGAGCAGTTCTTC	peak10	M1_0_F1	0	101	CD4
TGCAGTGCTCCAGACAGGCGTAACACCGGGGAGCTGTTTTTT	peak10	M1_0_F1	0	102	CD4
TGCAGTGCTCCCACTAGCGGGGGTCACAATGAGCAGTTCTTC	peak15	M1_0_F1	0	103	CD8
TGCAGTGCTCCCGGACAGCTCTTGGGGGAGACCCAGTACTTC	peak15	M1_0_F1	0	104	CD8
TGCAGTGCTCCCTGGGGCGCGGGGACTGAAGCTTTCTTT	peak21	M1_0_F1	0	105	CD8
TGCAGTGCTCCGACTAGCGGGGGGGCTAATGAGCAGTTCTTC	peak21	M1_0_F1	0	106	CD8
TGCAGTGCTCCGACTGGCGGGGGGTCCAACGAGCAGTACTTC	peak15	M1_0_F1	0	107	CD8
TGCAGTGCTGAGAAAGAGTCGTGGAACGAGCAGTTCTTC	peak15	M1_0_F1	0	108	CD4
TGCAGTGCTGATACAAATACAGGGGCTAGCAATCAGCCCCAGCATTTT	peak15	M1_0_F1	0	109	CD4
TGCAGTGCTGGGGACAGTGTGAATGAGCAGTTCTTC	peak21	M1_0_F1	0	110	CD8
TGCAGTGCTGGGGAGGGCGAGGGCCAGCCCCAGCATTTT	peak10	M1_0_F1	0	111	CD8
TGCAGTGCTGGTACAGGGTTCCTTAATTCACCCCTCCACTTT	peak15	M1_0_F1	0	112	CD8
TGCAGTGCTGTGCGGGGACAGGGAAGTTCGGATACGCAGTATTTT	peak15	M1_0_F1	0	113	CD4
TGCAGTGCTTATGGACAGGGACCAGAAAAACTGTTTTTT	peak15	M1_0_F1	0	114	CD4
TGCAGTGCTTCAGACCGGGACAGGGGAAACTACGAGCAGTACGTC	peak15	M1_0_F1	0	115	CD8
TGCAGTGCTTCGATGGAGGCAGCCAGCACTTACGAGCAGTACTTC	peak15	M1_0_F1	0	116	CD8
TGCAGTGCTTCTGCCGGGACAGAATCCAGCTCCTACGAGCAGTACTTC	peak15	M1_0_F1	0	117	CD8
TGCAGTGGGCAGCCCGAAAGCTCCTACGAGCAGTACTTC	peak10	M1_0_F1	0	118	CD8
TGCAGTGTAGCCGGGACCCCAACCTACGAGCAGTACTTC	peak5	M1_0_F1	0	119	CD4
TGCAGTGTCCAGGGGGAGGTCGGGGAGCTGTTTTTT	peak15	M1_0_F1	0	120	CD4
TGCAGTGTCCCGACTAGCGGGGGCTACAATGAGCAGTTCTTC	peak15	M1_0_F1	0	121	CD8
TGCAGTGTGCGGACAGGGTACAATGAGCAGTTCTTC	peak10	M1_0_F1	0	122	CD4
TGCAGTGTTCCGACTAGCGGGGGGGAAAACATTCAGTACTTC	peak15	M1_0_F1	0	123	CD8
TGCATTCCTACGGGGGCAGGGATCTCTGGAAACACCATATATTTT	peak15	M1_0_F1	0	124	CD8
TGCGCCACTCGGGACAGTGGGAACATTCAGTACTTC	peak15	M1_0_F1	0	125	CD4
TGCGCCAGCAACACCGGAGTAGCGGGGGAGGACTACAATGAGCAGTTCTTC	peak10	M1_0_F1	0	126	CD4
TGCGCCAGCAACGATCCTAGCGGGGGCAAGACCCAGTACTTC	peak15	M1_0_F1	0	127	CD4
TGCGCCAGCACCGAGTAGGAAGCTTTCTTT	peak15	M1_0_F1	0	128	CD8
TGCGCCAGCACTAACCTCGGGACAGGGGCGTTTTACGAGCAGTACTTC	peak15	M1_0_F1	0	129	CD4
TGCGCCAGCAGAACGGACAGGGTGAGGTATGGCTACACCTTC	peak21	M1_0_F1	0	130	CD8
TGCGCCAGCAGAATGGGACAGGGGGCATCAGATACGCAGTATTTT	peak15	M1_0_F1	0	131	CD4
TGCGCCAGCAGAGGAACAGGCGGACCTCAAGAGACCCAGTACTTC	peak15	M1_0_F1	0	132	CD8
TGCGCCAGCAGATCAGGATTCACTGAAGCTTTCTTT	peak15	M1_0_F1	0	133	CD8
TGCGCCAGCAGCACATTTAATTCACCCCTCCACTTT	peak21	M1_0_F1	0	135	CD8
TGCGCCAGCAGCACCTCCTCGACAGGGGCCTATGGCTACACCTTC	peak21	M1_0_F1	0	136	CD8
TGCGCCAGCAGCACGGACGTTGGGGGCGAGCAGTACTTC	peak15	M1_0_F1	0	137	CD4
TGCGCCAGCAGCACGGAGGGGTCTGGTGGGGCCAACGTCCTGACTTTC	peak15	M1_0_F1	0	138	CD4
TGCGCCAGCAGCACTAGTGGGGAGCTGTTTTTT	peak21	M1_0_F1	0	139	CD4
TGCGCCAGCAGCCAAACAACGGCTCCAACCTACGAGCAGTACTTC	peak21	M1_0_F1	0	140	CD8
TGCGCCAGCAGCCAAACCCTCTCCTACGAGCAGTACTTC	peak10	M1_0_F1	0	141	CD8
TGCGCCAGCAGCCAAACCGAAGGGGGTGCTTATGGCTACACCTTC	peak21	M1_0_F1	0	142	CD8
TGCGCCAGCAGCCAAACTCCGGGACAGGGGGCCGATGAGCAGTTCTTC	peak15	M1_0_F1	0	143	CD4
TGCGCCAGCAGCCAACCGGGACTCTCCTACAATGAGCAGTTCTTC	peak21	M1_0_F1	0	144	CD4
TGCGCCAGCAGCCAACCGTCCACGGACGAGCAGTACTTC	peak15	M1_0_F1	0	145	CD8
TGCGCCAGCAGCCAAGAAAGTAACACCGGGGAGCTGTTTTTT	peak5	M1_0_F1	0	147	CD4
TGCGCCAGCAGCCAAGAACGGGCCTACGAGCAGTACTTC	peak10	M1_0_F1	0	148	CD8
TGCGCCAGCAGCCAAGAACTGACCTACGAGCAGTACTTC	peak15	M1_0_F1	0	149	CD8
TGCGCCAGCAGCCAAGACAGGGGAAGGGGCTACACCTTC	peak10	M1_0_F1	0	150	CD4
TGCGCCAGCAGCCAAGACCACAGCCTCTCTCCCCAGCATTTT	peak21	M1_0_F1	0	151	CD8
TGCGCCAGCAGCCAAGACCCCTCCGACACCGGGGAGCTGTTTTTT	peak15	M1_0_F1	0	152	CD8
TGCGCCAGCAGCCAAGACCTGGCGGGGGGGTGGACTGAAGCTTTCTTT	peak15	M1_0_F1	0	153	CD4
TGCGCCAGCAGCCAAGACGACAGGGCCAACGTCTATGGCTACACCTTC	peak15	M1_0_F1	0	154	CD4
TGCGCCAGCAGCCAAGACGGGCGGACAGGGGGCGCCTATGGCTACACCTTC	peak10	M1_0_F1	0	155	CD8
TGCGCCAGCAGCCAAGACGGGGGGCGCAGGGAGACCCAGTACTTC	peak21	M1_0_F1	0	156	CD8
TGCGCCAGCAGCCAAGACGTAGCTAGCTCCTACAATGAGCAGTTCTTC	peak10	M1_0_F1	0	157	CD8
TGCGCCAGCAGCCAAGACTATAGCATCTACCCTCGCGAGCAGTACTTC	peak21	M1_0_F1	0	158	CD4
TGCGCCAGCAGCCAAGACTGGATAAATGAGCAGTTCTTC	peak10	M1_0_F1	0	159	CD8
TGCGCCAGCAGCCAAGACTGGGTCGAGGGAAACTATGGCTACACCTTC	peak15	M1_0_F1	0	160	CD8
TGCGCCAGCAGCCAAGAGCCCGGGACGGGGATTTACAATGAGCAGTTCTTC	peak10	M1_0_F1	0	161	CD8
TGCGCCAGCAGCCAAGAGGCAGGGGGTTCTAACTATGGCTACACCTTC	peak21	M1_0_F1	0	162	CD8
TGCGCCAGCAGCCAAGAGGGAACAGGCAACTATGGCTACACCTTC	peak21	M1_0_F1	0	163	CD8
TGCGCCAGCAGCCAAGAGGTGACGGTAACTTCCTATGGCTACACCTTC	peak15	M1_0_F1	0	164	CD8
TGCGCCAGCAGCCAAGAGGTGCAGGGGAACACCGGGGAGCTGTTTTTT	peak15	M1_0_F1	0	165	CD4
TGCGCCAGCAGCCAAGAGTCAAGCACGGTCTACGAGCAGTACTTC	peak21	M1_0_F1	0	166	CD8
TGCGCCAGCAGCCAAGAGTCCCCGAGCTCCGGGGAGCTGTTTTTT	peak10	M1_0_F1	0	167	CD8
TGCGCCAGCAGCCAAGAGTCGCTGGGTAACTATGGCTACACCTTC	peak21	M1_0_F1	0	168	CD8
TGCGCCAGCAGCCAAGATAACAACCCGGGCTATGGCTACACCTTC	peak15	M1_0_F1	0	169	CD8
TGCGCCAGCAGCCAAGATACCCCTCAGCCCCAGCATTTT	peak15	M1_0_F1	0	170	CD8
TGCGCCAGCAGCCAAGATACCCGGGAACCCCAGCATTTT	peak15	M1_0_F1	0	171	CD4
TGCGCCAGCAGCCAAGATATCATAGTCAACATTCAGTACTTC	peak15	M1_0_F1	0	172	CD4
TGCGCCAGCAGCCAAGATCAAGGCGGACAGGGGGCCTATGGCTACACCTTC	peak15	M1_0_F1	0	173	CD8
TGCGCCAGCAGCCAAGATCAGCCCACCAAGCAGTTCTTC	peak15	M1_0_F1	0	174	CD8
TGCGCCAGCAGCCAAGATCCCCGTACAGGGTTAGGCGATAATGAGCAGTTCTTC	peak15	M1_0_F1	0	175	CD8
TGCGCCAGCAGCCAAGATCGGCGGGACCCCTACGAGCAGTACTTC	peak21	M1_0_F1	0	176	CD8
TGCGCCAGCAGCCAAGATCGGGCAGCCTCTGGAAACACCATATATTTT	peak15	M1_0_F1	0	177	CD4
TGCGCCAGCAGCCAAGATCTTACAGGGGGCGCGTACGAGCAGTACTTC	peak15	M1_0_F1	0	178	CD8
TGCGCCAGCAGCCAAGATGAGCGGTGGTCGGGCTACACCTTC	peak10	M1_0_F1	0	179	CD8
TGCGCCAGCAGCCAAGATGTGGGGCAGCCCCAGCATTTT	peak15	M1_0_F1	0	180	CD4
TGCGCCAGCAGCCAAGATTCCGGGACAGGGGCTTACGAGCAGTACTTC	peak15	M1_0_F1	0	181	CD8
TGCGCCAGCAGCCAAGATTGGGGACAGGGTGACGCTGAAGCTTTCTTT	peak15	M1_0_F1	0	182	CD8
TGCGCCAGCAGCCAAGATTGGTCAGGGGGCCCCTACGAGCAGTACTTC	peak15	M1_0_F1	0	183	CD4
TGCGCCAGCAGCCAAGCAACCGGGACAGCTTATGGCTACACCTTC	peak15	M1_0_F1	0	184	CD8
TGCGCCAGCAGCCAAGCCCTTTTACGGGTGAACACTGAAGCTTTCTTT	peak10	M1_0_F1	0	185	CD4
TGCGCCAGCAGCCAAGCGACAGCCTACGAGCAGTACGTC	peak15	M1_0_F1	0	186	CD8
TGCGCCAGCAGCCAAGCGGACAGGGTTATGAACACTGAAGCTTTCTTT	peak10	M1_0_F1	1.03e-06	187	CD4
TGCGCCAGCAGCCAAGCTTCGCTGGCGGGTAACACCGGGGAGCTGTTTTTT	peak15	M1_0_F1	0	188	CD8
TGCGCCAGCAGCCAAGGAGGCTATGGCTACACCTTC	peak15	M1_0_F1	0	189	CD8
TGCGCCAGCAGCCAAGGATCCGCAGGGAACCAGCCCCAGCATTTT	peak10	M1_0_F1	0	190	CD8
TGCGCCAGCAGCCAAGGCGAAACGGCAACCACCGGGGAGCTGTTTTTT	peak10	M1_0_F1	0	191	CD8
TGCGCCAGCAGCCAAGGCGGGACAGCGGCATATGGCTACACCTTC	peak10	M1_0_F1	0	192	CD8
TGCGCCAGCAGCCAAGGGGAAGCGGGGGGGCTTTACAATGAGCAGTTCTTC	peak21	M1_0_F1	0	193	CD8
TGCGCCAGCAGCCAAGGGGGACCGGGACAGGGTCCAGATACGCAGTATTTT	peak21	M1_0_F1	0	194	CD4
TGCGCCAGCAGCCAAGGGGGTATGATGAGTCAGCCCCAGCATTTT	peak21	M1_0_F1	0	195	CD8
TGCGCCAGCAGCCAAGGGTCAGGGGTCGGTAATTCACCCCTCCACTTT	peak15	M1_0_F1	0	196	CD8
TGCGCCAGCAGCCAAGGGTCGGACAGGGGGCAGGACGAGCAGTACTTC	peak15	M1_0_F1	0	197	CD8
TGCGCCAGCAGCCAAGGTTATGCGAATAGCATCCATGAGCAGTTCTTC	peak10	M1_0_F1	0	198	CD4
TGCGCCAGCAGCCAAGTAACAGGGGGAAGCTATGGCTACACCTTC	peak15	M1_0_F1	0	199	CD8
TGCGCCAGCAGCCAAGTAACGGAGACAGGGCCGTATGGCTACACCTTC	peak21	M1_0_F1	0	200	CD8
TGCGCCAGCAGCCAAGTAAGCACTGAAGCTTTCTTT	peak21	M1_0_F1	1.03e-06	201	CD8
TGCGCCAGCAGCCAAGTCCTCTGGTACAATGAGCAGTTCTTC	peak15	M1_0_F1	0	202	CD4
TGCGCCAGCAGCCAAGTGGAAAGTGCGCGAGGAAACATTCAGTACTTC	peak15	M1_0_F1	0	203	CD8
TGCGCCAGCAGCCAAGTTTTCACCAACTCCTACAATGAGCAGTTCTTC	peak15	M1_0_F1	0	204	CD8
TGCGCCAGCAGCCACGGGACAGGGGGCAATCAGCCCCAGCATTTT	peak15	M1_0_F1	0	205	CD8
TGCGCCAGCAGCCACGGGACGGCCTATGGCTACACCTTC	peak21	M1_0_F1	0	206	CD8
TGCGCCAGCAGCCAGACGTGGGCAGGGGCCTTACCCTACGAGCAGTACTTC	peak15	M1_0_F1	0	207	CD8
TGCGCCAGCAGCCAGCTAGCTACGAGCTCCTACGAGCAGTACTTC	peak15	M1_0_F1	0	208	CD8
TGCGCCAGCAGCCAGCTTTCTAGCGGGGGACCACCGAGGAGGGATACGCAGTATTTT	peak5	M1_0_F1	0	209	CD8
TGCGCCAGCAGCCAGGGACCCGGGACAGGAGCCTACGAGCAGTACTTC	peak15	M1_0_F1	0	210	CD8
TGCGCCAGCAGCCAGGGCGGGGCGGGGGGCTCCTACGAGCAGTACTTC	peak21	M1_0_F1	0	211	CD8
TGCGCCAGCAGCCAGTTTGTGAGCTCCTACGAGCAGTACTTC	peak15	M1_0_F1	0	212	CD8
TGCGCCAGCAGCCATGCCGGGCAGGCGACTTTCTTT	peak15	M1_0_F1	0	213	CD8
TGCGCCAGCAGCCATGGGGGTGGAAACACCATATATTTT	peak10	M1_0_F1	0	214	CD8
TGCGCCAGCAGCCCAGCGGGGGACTCCTACGAGCAGTACTTC	peak15	M1_0_F1	0	215	CD8
TGCGCCAGCAGCCCAGGACAGGGGTCCTACGAGCAGTACTTC	peak15	M1_0_F1	0	216	CD8
TGCGCCAGCAGCCCAGTGGCGGGGAGCTCCTACGAGCAGTACTTC	peak10	M1_0_F1	0	217	CD8
TGCGCCAGCAGCCCCGACAGTGGACTCACAGATACGCAGTATTTT	peak15	M1_0_F1	0	218	CD4
TGCGCCAGCAGCCCCGCGGAGGCCTACGAGCAGTACTTC	peak15	M1_0_F1	0	219	CD8
TGCGCCAGCAGCCCCGGGACAGGAGCGGGCTATGGCTACACCTTC	peak15	M1_0_F1	0	220	CD8
TGCGCCAGCAGCCCCTACTCAGGGGGAGGTGAGCAGTTCTTC	peak10	M1_0_F1	0	221	CD8
TGCGCCAGCAGCCCCTCACAGGCCTACGAGCAGTACTTC	peak15	M1_0_F1	0	222	CD8
TGCGCCAGCAGCCCCTCCCGAACGGGGGCCTACGAGCAGTACTTC	peak21	M1_0_F1	0	223	CD8
TGCGCCAGCAGCCCCTCTCCAGGGGAGGCCTATGGCTACACCTTC	peak21	M1_0_F1	0	224	CD8
TGCGCCAGCAGCCCCTTACAGGGAAGCTCCTACGAGCAGTACTTC	peak21	M1_0_F1	0	225	CD4
TGCGCCAGCAGCCCGACAGGGCAAAACGCTGAAGCTTTCTTT	peak15	M1_0_F1	0	226	CD4
TGCGCCAGCAGCCCGACGGAGATTAGGGCCTTC	peak15	M1_0_F1	0	227	CD8
TGCGCCAGCAGCCCGGAGGCAGATTCAACTAATGAAAAACTGTTTTTT	peak15	M1_0_F1	0	228	CD4
TGCGCCAGCAGCCCGGGACAGACCCTAACTATACAAGAGACCCAGTACTTC	peak15	M1_0_F1	0	229	CD4
TGCGCCAGCAGCCCGTCTATGGCAGCGAGCTACGAGCAGTACTTC	peak21	M1_0_F1	0	230	CD8
TGCGCCAGCAGCCCTAGCGGGGGGACCGCCTACGAGCAGTACTTC	peak15	M1_0_F1	0	231	CD8
TGCGCCAGCAGCCCTGCGGCTAGCCTCCTTAACACCGGGGAGCTGTTTTTT	peak15	M1_0_F1	0	232	CD4
TGCGCCAGCAGCCGACAAGTTGGGATATCGAGCACGCCAGATACGCAGTATTTT	peak15	M1_0_F1	0	233	CD4
TGCGCCAGCAGCCGATCGCCCCCGGAACAGGGGGTTGGTCAGCCCCAGCATTTT	peak10	M1_0_F1	1.03e-06	234	CD4
TGCGCCAGCAGCCGATCGGGACAGCCTTACTACAATGAGCAGTTCTTC	peak10	M1_0_F1	0	235	CD8
TGCGCCAGCAGCCGCGGGGACCCAGCCTACGAGCAGTACTTC	peak21	M1_0_F1	0	236	CD8
TGCGCCAGCAGCCGGAACCCTCGGGACATCTCTGGGGCCAACGTCCTGACTTTC	peak10	M1_0_F1	2.05e-06	237	CD4
TGCGCCAGCAGCCGGCGGACTAGCGGGGGGGATACAGATACGCAGTATTTT	peak10	M1_0_F1	0	238	CD4
TGCGCCAGCAGCCGGGGACAGCCGAACACTGAAGCTTTCTTT	peak10	M1_0_F1	0	239	CD4
TGCGCCAGCAGCCGGGGAGAGGGTCGGGACAATAGGTCACCCCTCCACTTT	peak15	M1_0_F1	0	240	CD8
TGCGCCAGCAGCCGGGGGGGGGGCTACAATGAGCAGTTCTTC	peak15	M1_0_F1	0	241	CD8
TGCGCCAGCAGCCTAGGGACAGGGGATGAGCAGTTCTTC	peak15	M1_0_F1	0	242	CD8
TGCGCCAGCAGCCTCCTCGAAAACTCTGGAAACACCATATATTTT	peak15	M1_0_F1	0	243	CD4
TGCGCCAGCAGCCTGAGATATAGCACAGATACGCAGTATTTT	peak15	M1_0_F1	0	244	CD8
TGCGCCAGCAGCCTGGCCGAGCGGGCCGGGGAGCTGTTTTTT	peak21	M1_0_F1	0	245	CD4
TGCGCCAGCAGCCTGGGCGGAGCGCGCACAGATACGCAGTATTTT	peak5	M1_0_F1	0	246	CD4
TGCGCCAGCAGCGAGCAGGTCGGGGGGCGATACAATGAGCAGTTCTTC	peak15	M1_0_F1	0	247	CD4
TGCGCCAGCAGCGATGGACAGGGAACAGATACGCAGTATTTT	peak15	M1_0_F1	0	248	CD4
TGCGCCAGCAGCGCCCGAGGAGGCGGGAACACAGATACGCAGTATTTT	peak15	M1_0_F1	0	249	CD4
TGCGCCAGCAGCGGGCCCGACTCTGGAAACACCATATATTTT	peak15	M1_0_F1	0	251	CD4
TGCGCCAGCAGCGGGGCGGGGGGGTACGAGCAGTACTTC	peak15	M1_0_F1	0	252	CD8
TGCGCCAGCAGCGTAGTAGGGGGTTTTGAGCAGTTCTTC	peak15	M1_0_F1	0	253	CD4
TGCGCCAGCAGCTACCAAAGGACAGGCGGTGAAGCTTTCTTT	peak15	M1_0_F1	0	254	CD4
TGCGCCAGCAGCTCAACTTACACCGGGGAGCTGTTTTTT	peak21	M1_0_F1	0	255	CD4
TGCGCCAGCAGCTCCCCTAGCGGGGGTAATGAGCAGTTCTTC	peak15	M1_0_F1	0	257	CD4
TGCGCCAGCAGCTCCCGGATATCGACGCCGCCAGATACGCAGTATTTT	peak10	M1_0_F1	0	258	CD4
TGCGCCAGCAGCTCCGCGGAGGCCTACGAGCAGTACTTC	peak21	M1_0_F1	0	259	CD8
TGCGCCAGCAGCTCGCAATTTTCAGTCGGGACAGGGCAAAACATTCAGTACTTC	peak15	M1_0_F1	0	260	CD4
TGCGCCAGCAGCTCGGACGTGGGAGGTGAGCAGTTCTTC	peak15	M1_0_F1	0	262	CD4
TGCGCCAGCAGCTCGGGGCAGGGAACCTATGGCTACACCTTC	peak10	M1_0_F1	0	263	CD4
TGCGCCAGCAGCTCGGGTGGACAGGGGGCAGACTATGGCTACACCTTC	peak21	M1_0_F1	0	264	CD8
TGCGCCAGCAGCTGGACTGACAGCGCACCTTTCTACGAGCAGTACTTC	peak15	M1_0_F1	0	265	CD8
TGCGCCAGCAGCTTAAACCTCCTCTCGTCCAATGAGCAGTTCTTC	peak15	M1_0_F1	0	266	CD4
TGCGCCAGCAGCTTACAGGGCGATGAGCAGTTCTTC	peak15	M1_0_F1	0	267	CD4
TGCGCCAGCAGCTTACTAGGGGGGATTCAAGAGACCCAGTACTTC	peak15	M1_0_F1	0	268	CD4
TGCGCCAGCAGCTTATACGTGTCGGCAGATACGCAGTATTTT	peak10	M1_0_F1	0	269	CD4
TGCGCCAGCAGCTTCCAGGGGTCTGAAGCTTTCTTT	peak15	M1_0_F1	0	270	CD4
TGCGCCAGCAGCTTCGACTCTACCGGGGAGCTGTTTTTT	peak15	M1_0_F1	0	271	CD8
TGCGCCAGCAGCTTCGGACAGGACCCAGATACGCAGTATTTT	peak15	M1_0_F1	0	272	CD4
TGCGCCAGCAGCTTCTCGACAGGAACCTACGAGCAGTACTTC	peak15	M1_0_F1	0	273	CD4
TGCGCCAGCAGCTTGATGTCAGGAGAAAATGAGCAGTTCTTC	peak15	M1_0_F1	0	274	CD4
TGCGCCAGCAGCTTGCTATCTGGACAGAGCTCCTACAATGAGCAGTTCTTC	peak15	M1_0_F1	0	275	CD4
TGCGCCAGCAGCTTGGAACAGGGCTATGGCTACACCTTC	peak15	M1_0_F1	0	276	CD4
TGCGCCAGCAGCTTGGAACCCGATCAGCCCCAGCATTTT	peak15	M1_0_F1	0	277	CD4
TGCGCCAGCAGCTTGGAAGGGTCGGGTGGGGCCAACGTCCTGACTTTC	peak15	M1_0_F1	0	278	CD4
TGCGCCAGCAGCTTGGAATACGTAGGGAATTCACCCCTCCACTTT	peak15	M1_0_F1	0	279	CD4
TGCGCCAGCAGCTTGGAATGGGGAACTGGAAACACCATATATTTT	peak21	M1_0_F1	0	280	CD4
TGCGCCAGCAGCTTGGACCCAAACGACTATGGCTACACCTTC	peak10	M1_0_F1	0	281	CD4
TGCGCCAGCAGCTTGGACCCCCCAGATGCAGGAAACACCATATATTTT	peak15	M1_0_F1	0	282	CD4
TGCGCCAGCAGCTTGGACGAAGCCTACGAGCAGTACTTC	peak15	M1_0_F1	0	283	CD8
TGCGCCAGCAGCTTGGACGGAGACCCACTACGGGAGCAGTACGTC	peak15	M1_0_F1	0	284	CD4
TGCGCCAGCAGCTTGGAGAGCACAGATACGCAGTATTTT	peak10	M1_0_F1	1.03e-06	285	CD4
TGCGCCAGCAGCTTGGAGAGGATGGATCAGCCCCAGCATTTT	peak15	M1_0_F1	0	286	CD4
TGCGCCAGCAGCTTGGAGGCGAGAATCACCTACAATGAGCAGTTCTTC	peak15	M1_0_F1	0	287	CD4
TGCGCCAGCAGCTTGGAGGGGCTGATCTATGGCTACACCTTC	peak10	M1_0_F1	0	288	CD4
TGCGCCAGCAGCTTGGCCAGGGCAAACACCGGGGAGCTGTTTTTT	peak10	M1_0_F1	0	289	CD4
TGCGCCAGCAGCTTGGCCCCAGGGCCCTACGAGCAGTACTTC	peak21	M1_0_F1	0	290	CD4
TGCGCCAGCAGCTTGGCCGAGGCTTACGAGCAGTACTTC	peak15	M1_0_F1	0	291	CD8
TGCGCCAGCAGCTTGGCCGGCGGGGGCGGAGAGACCCAGTACTTC	peak10	M1_0_F1	0	292	CD4
TGCGCCAGCAGCTTGGCCTGGGGAAATCCCACAGATACGCAGTATTTT	peak10	M1_0_F1	0	293	CD4
TGCGCCAGCAGCTTGGCGGACAGGGGGCGTGAAGCTTTCTTT	peak21	M1_0_F1	0	294	CD4
TGCGCCAGCAGCTTGGCGTACCTGAACACTGAAGCTTTCTTT	peak15	M1_0_F1	0	295	CD8
TGCGCCAGCAGCTTGGGAAACGGAGGCGAGCAGTACTTC	peak10	M1_0_F1	0	296	CD4
TGCGCCAGCAGCTTGGGGACAGGTGGCAATCAGCCCCAGCATTTT	peak21	M1_0_F1	0	297	CD8
TGCGCCAGCAGCTTGGGGGACAGCGTAGATCAGCCCCAGCATTTT	peak15	M1_0_F1	0	298	CD4
TGCGCCAGCAGCTTGGGGGACAGTTTAAGGCCCCTCCACTTT	peak10	M1_0_F1	1.03e-06	299	CD4
TGCGCCAGCAGCTTGGGGGGGGGGCGCAATGAGCAGTTCTTC	peak15	M1_0_F1	0	300	CD4
TGCGCCAGCAGCTTGGTAAGAGGGGCCAACGTCCTGACTTTC	peak10	M1_0_F1	0	301	CD4
TGCGCCAGCAGCTTGGTGGTGGGGGCCAACAATGAGCAGTTCTTC	peak15	M1_0_F1	0	302	CD4
TGCGCCAGCAGCTTTCAGGGGGGCACTGAAGCTTTCTTT	peak21	M1_0_F1	0	303	CD8
TGCGCCAGCAGCTTTCTCGGGGTCGATGGGGAGACCCAGTACTTC	peak10	M1_0_F1	0	304	CD4
TGCGCCAGCAGCTTTGTCAGGCTCCAAGGAAACACTGAAGCTTTCTTT	peak15	M1_0_F1	0	305	CD8
TGCGCCAGCAGCTTTTCCGGGACAGGGAACAATGAGCAGTTCTTC	peak15	M1_0_F1	0	306	CD8
TGCGCCAGCAGGAATCCCCGGAGCTCCTACGAGCAGTACTTC	peak15	M1_0_F1	0	307	CD8
TGCGCCAGCAGGCAGGGACAGGGGGGCTACACCTTC	peak15	M1_0_F1	0	308	CD8
TGCGCCAGCAGGGAAGGGACTAGCGGGGGGCAAAATACGCAGTATTTT	peak15	M1_0_F1	0	309	CD4
TGCGCCAGCAGGGACATGAATTACGAGCAGTACTTC	peak15	M1_0_F1	0	310	CD4
TGCGCCAGCAGGGCGGAGCTATCTATGAACACTGAAGCTTTCTTT	peak21	M1_0_F1	0	311	CD4
TGCGCCAGCAGGTCCGGGACAACGAACTATGGCTACACCTTC	peak15	M1_0_F1	0	312	CD8
TGCGCCAGCAGTAACCTAGCGGGGGGGGAAGAGACCCAGTACTTC	peak21	M1_0_F1	0	313	CD4
TGCGCCAGCAGTCAACCAGGACAGGGGCCCCCTACGAGCAGTACTTC	peak15	M1_0_F1	0	314	CD8
TGCGCCAGCAGTCAAGAGGCAGCCAGCTCCTATAATTCACCCCTCCACTTT	peak21	M1_0_F1	0	315	CD8
TGCGCCAGCAGTCAATCCCCGTGGTCCAGGGGGGTATAGCTGTTTTTT	peak21	M1_0_F1	0	316	CD8
TGCGCCAGCAGTCCCTAGGGAGGAGGGCCTGAGAGCAGTACTTC	peak15	M1_0_F1	0	317	CD8
TGCGCCAGCAGTCTCTTAGCACAGATACGCAGTATTTT	peak21	M1_0_F1	0	318	CD8
TGCGCCAGCAGTCTTGAGGTAGGCACTGAAGCTTTCTTT	peak15	M1_0_F1	0	319	CD8
TGCGCCAGCAGTGAGATCCGAGGGACAGGGTCCCACGAGCAGTACTTC	peak10	M1_0_F1	0	320	CD8
TGCGCCAGCAGTGAGGAGGAGGTAGCCTACGAGCAGTACTTC	peak15	M1_0_F1	0	321	CD8
TGCGCCAGCAGTGAGGGAAGGACAGGGGACTACAATGAGCAGTTCTTC	peak21	M1_0_F1	0	322	CD4
TGCGCCAGCAGTGAGTCGGGGACTAGCGAATACAATGAGCAGTTCTTC	peak15	M1_0_F1	0	323	CD4
TGCGCCAGCAGTGCTACGGGTGCCTACGAGCAGTACTTC	peak15	M1_0_F1	0	324	CD8
TGCGCCAGCAGTGTTGAGCGGGAAACTTACGAGCAGTACTTC	peak15	M1_0_F1	0	325	CD8
TGCGCCAGCAGTTAACAGGGGGCAATCGGGGAGCTGTTTTTT	peak10	M1_0_F1	0	326	CD8
TGCGCCAGCCGACGGACAGCAGGAGCCCACAGCCCCAGCATTTT	peak21	M1_0_F1	0	327	CD8
TGCGCCAGCCGGCGGGAGGGAACGATGAACACTGAAGCTTTCTTT	peak15	M1_0_F1	0	328	CD4
TGCGCCAGCCGGGACGGAGCCTACGAGCAGTACTTC	peak15	M1_0_F1	0	329	CD4
TGCGCCAGCCGGGGAGGGGGACAGGGGATACAGAACTATGGCTACACCTTC	peak15	M1_0_F1	0	330	CD8
TGCGCCAGCCTTGGCGAGGGGAGAAGCACCGGGGAGCTGTTTTTT	peak15	M1_0_F1	0	331	CD8
TGCGCCAGCGGGGTCGGAACCTACAATGAGCAGTTCTTC	peak15	M1_0_F1	0	332	CD4
TGCGCCAGCTCCCCATGGCGGGGGGCCTACAATGAGCAGTTCTTC	peak21	M1_0_F1	0	333	CD8
TGCGCCAGCTTAGGTCCGAATAATTCACCCCTCCACTTT	peak15	M1_0_F1	0	334	CD8
TGCTCCCAGGGGGACAGGGGTCTTAACACTGAAGCTTTCTTT	peak21	M1_0_F1	0	335	CD8
TGTGCCAACTAGCACCCGGGGCTCATCTTCAATCAGCCCCAGCATTTT	peak21	M1_0_F1	0	336	CD4
TGTGCCAATACGGGACTGAACACCGGGGAGCTGTTTTTT	peak15	M1_0_F1	0	337	CD8
TGTGCCACACTATCCGGGACAACGAACACCGGGGAGCTGTTTTTT	peak10	M1_0_F1	0	338	CD4
TGTGCCACAGGCCGGTCCTCGACCTACGAGCAGTACTTC	peak15	M1_0_F1	0	339	CD8
TGTGCCACCAAACCGGGCCCCGGTTCGCCCCAGCATTTT	peak15	M1_0_F1	0	340	CD4
TGTGCCACCACGGAGGGGGGGGCCTACGAGCAGTACTTC	peak15	M1_0_F1	0	341	CD8
TGTGCCACCACTAACCGACCCTCTGGGGCCAACGTCCTGACTTTC	peak15	M1_0_F1	0	342	CD8
TGTGCCACCAGCACCCGGGCCGCCGGCGAGCAGTACTTC	peak15	M1_0_F1	0	343	CD8
TGTGCCACCAGCACCGCAACAGGGGGATACGAGCAGTACTTC	peak15	M1_0_F1	0	344	CD8
TGTGCCACCAGCACCGCCGAGAACTATGGCTACACCTTC	peak15	M1_0_F1	0	345	CD8
TGTGCCACCAGCACGGGCTTGGCCTACGAGCAGTACGTC	peak21	M1_0_F1	0	346	CD8
TGTGCCACCAGCAGAACCGACAGGATCCTCATCGAGCAGTACTTC	peak15	M1_0_F1	0	347	CD8
TGTGCCACCAGCAGACAGGCGAATACAGATACGCAGTATTTT	peak10	M1_0_F1	0	348	CD8
TGTGCCACCAGCAGAGAGGAAAGGAGGGCTAATGAAAAACTGTTTTTT	peak21	M1_0_F1	0	349	CD8
TGTGCCACCAGCAGAGAGGTCGCGGGTTACAATGAGCAGTTCTTC	peak15	M1_0_F1	0	350	CD4
TGTGCCACCAGCAGAGATCAAGAGGGAGCCAATCAGCCCCAGCATTTT	peak21	M1_0_F1	0	351	CD8
TGTGCCACCAGCAGAGATCGACCAGGCCAGCCCCAGCATTTT	peak21	M1_0_F1	0	352	CD8
TGTGCCACCAGCAGAGATCTCCCGACAGGACGACAAGAGACCCAGTACTTC	peak21	M1_0_F1	0	353	CD8
TGTGCCACCAGCAGAGATGCGGACGGGCCCAGATCACCCCTCCACTTT	peak10	M1_0_F1	0	354	CD4
TGTGCCACCAGCAGAGATTCCCCCATACTCAGCATTCAGTACTTC	peak15	M1_0_F1	0	355	CD4
TGTGCCACCAGCAGAGATTGGCTAGCGGGGGGGCAAGAGACCCAGTACTTC	peak15	M1_0_F1	0	356	CD8
TGTGCCACCAGCAGAGCCCCACTAGCGGGGGGTAATGAGCAGTTCTTC	peak15	M1_0_F1	0	357	CD8
TGTGCCACCAGCAGAGCCCCAGGGTACGAGCAGTACGTC	peak21	M1_0_F1	0	358	CD8
TGTGCCACCAGCAGAGCCCCCCTAGCGGGGGGCAATGAGCAGTTCTTC	peak21	M1_0_F1	0	359	CD8
TGTGCCACCAGCAGAGCCGGGGCCTACGAGCAGTACTTC	peak15	M1_0_F1	0	360	CD8
TGTGCCACCAGCAGAGCGACAGGGGCTCAGCCCCAGCATTTT	peak21	M1_0_F1	0	361	CD8
TGTGCCACCAGCAGAGCGACGGGCGCTGAAGCTTTCTTT	peak15	M1_0_F1	0	362	CD8
TGTGCCACCAGCAGAGCGAGCCTCACAGATACGCAGTATTTT	peak5	M1_0_F1	0	363	CD8
TGTGCCACCAGCAGAGCGGACCCTGCCTACGAGCAGTACTTC	peak15	M1_0_F1	0	364	CD8
TGTGCCACCAGCAGAGCGGCAGGTTCCTACGAGCAGTACTTC	peak21	M1_0_F1	0	365	CD8
TGTGCCACCAGCAGAGCGGTAGCGGGGGGCAATGAGCAGTTCTTC	peak15	M1_0_F1	0	366	CD4
TGTGCCACCAGCAGAGCTATGAACACTGAAGCTTTCTTT	peak21	M1_0_F1	0	367	CD8
TGTGCCACCAGCAGAGGACAGAGAACCTACGAGCAGTACTTC	peak15	M1_0_F1	0	368	CD8
TGTGCCACCAGCAGAGGACAGCTCTACGAGCAGTACTTC	peak15	M1_0_F1	0	369	CD8
TGTGCCACCAGCAGAGGACAGGCCTACGAGCAGTACGTC	peak21	M1_0_F1	0	370	CD8
TGTGCCACCAGCAGAGGACAGGCGGGCGGTAATTCACCCCTCCACTTT	peak15	M1_0_F1	0	371	CD8
TGTGCCACCAGCAGAGGACAGGGGCGGACCTACGAGCAGTACTTC	peak10	M1_0_F1	0	372	CD8
TGTGCCACCAGCAGAGGACAGGGGTACGAGCAGTACTTC	peak10	M1_0_F1	0	373	CD8
TGTGCCACCAGCAGAGGACAGGGTTACGAGCAGTACGTC	peak15	M1_0_F1	0	374	CD8
TGTGCCACCAGCAGAGGACAGGTCTCCTACAATGAGCAGTTCTTC	peak15	M1_0_F1	0	375	CD8
TGTGCCACCAGCAGAGGACTAGTTGGTTCCTACAATGAGCAGTTCTTC	peak21	M1_0_F1	0	376	CD8
TGTGCCACCAGCAGAGGAGAAAACACTGAAGCTTTCTTT	peak21	M1_0_F1	0	377	CD8
TGTGCCACCAGCAGAGGAGGAGGGTACGAGCAGTACTTC	peak21	M1_0_F1	0	378	CD8
TGTGCCACCAGCAGAGGCAAGGGCTCCTACAATGAGCAGTTCTTC	peak21	M1_0_F1	0	379	CD8
TGTGCCACCAGCAGAGGCCAGAGACTCTACGAGCAGTACTTC	peak15	M1_0_F1	0	380	CD8
TGTGCCACCAGCAGAGGCCGGAGCTCCTACAATGAGCAGTTCTTC	peak15	M1_0_F1	0	381	CD8
TGTGCCACCAGCAGAGGGATTTCCTACGAGCAGTACGTC	peak15	M1_0_F1	0	382	CD8
TGTGCCACCAGCAGAGGGGAATCCTACGAGCAGTACTTC	peak15	M1_0_F1	0	383	CD8
TGTGCCACCAGCAGAGGGGCAGCTTATAGCAATCAGCCCCAGCATTTT	peak10	M1_0_F1	0	384	CD8
TGTGCCACCAGCAGAGGGGGGGCCTACGAGCAGTACTTC	peak15	M1_0_F1	0	385	CD8
TGTGCCACCAGCAGAGGGTCCGGGACAGGGGCCTACGAGCAGTACTTC	peak15	M1_0_F1	0	386	CD8
TGTGCCACCAGCAGAGGTCAACAGCCGTTGGACTATGGCTACACCTTC	peak21	M1_0_F1	0	387	CD8
TGTGCCACCAGCAGAGTAGCCTACGCGTCTCAAGAGACCCAGTACTTC	peak15	M1_0_F1	0	388	CD8
TGTGCCACCAGCAGAGTCGAACTTCGCCAAGGGTCCCAGTACTTC	peak21	M1_0_F1	0	389	CD8
TGTGCCACCAGCAGATCCCCAGGGCTCGAGCAGTACGTC	peak15	M1_0_F1	0	390	CD8
TGTGCCACCAGCAGATCGCTTGGCTACGAGCAGTACTTC	peak15	M1_0_F1	0	391	CD8
TGTGCCACCAGCAGCGGACAGAGGAATTACAATGAGCAGTTCTTC	peak21	M1_0_F1	0	392	CD8
TGTGCCACCAGCAGCGGGACAGGACCCTACGAGCAGTACGTC	peak10	M1_0_F1	0	393	CD8
TGTGCCACCAGCAGCGGGACAGGTCCCTACGAGCAGTACTTC	peak21	M1_0_F1	0	394	CD8
TGTGCCACCAGCAGCGGGACCGCATACGAGCAGTACGTC	peak21	M1_0_F1	0	395	CD8
TGTGCCACCAGCAGGACAGGAGGGCATGAGCAGTTCTTC	peak10	M1_0_F1	0	396	CD8
TGTGCCACCAGCAGGGGACTAGCCTACAATGAGCAGTTCTTC	peak15	M1_0_F1	0	397	CD8
TGTGCCACCAGCAGGGGACTAGCGGGGGCCTACAATGAGCAGTTCTTC	peak15	M1_0_F1	0	398	CD8
TGTGCCACCAGCAGGGGCGGAGGGTACGAGCAGTACTTC	peak15	M1_0_F1	0	399	CD8
TGTGCCACCAGCAGGGGGATTTCGGGGCCATACAATGAGCAGTTCTTC	peak15	M1_0_F1	0	400	CD8
TGTGCCACCAGCAGGGGTCTTAGCTCCTACAATGAGCAGTTCTTC	peak21	M1_0_F1	0	401	CD8
TGTGCCACCAGCAGGGGTGGACAGGGTGGTAATTCACCCCTCCACTTT	peak21	M1_0_F1	0	402	CD8
TGTGCCACCAGCAGGTCAGGGGGCACTGAAGCTTTCTTT	peak15	M1_0_F1	0	403	CD8
TGTGCCACCAGCAGGTCCAAAGCCTACGAGCAGTACTTC	peak15	M1_0_F1	0	404	CD8
TGTGCCACCAGCAGGTTAGCGGGGGAACAAGAGACCCAGTACTTC	peak21	M1_0_F1	0	405	CD8
TGTGCCACCAGCAGTAAACTTACGATTACGGAGCAGTTCTTC	peak10	M1_0_F1	0	406	CD8
TGTGCCACCAGCAGTGCTCCGGGGCCTTACGAGCAGTACTTC	peak15	M1_0_F1	0	407	CD8
TGTGCCACCAGCAGTGGGACAGCCTACGAGCAGTACTTC	peak15	M1_0_F1	0	408	CD8
TGTGCCACCAGCATCCTGGAAATAGGGTCAGATACGCAGTATTTT	peak15	M1_0_F1	0	409	CD8
TGTGCCACCAGCATGGCGAGCAATCAGCCCCAGCATTTT	peak21	M1_0_F1	0	410	CD8
TGTGCCACCAGCCAGGGGGGGGCCTACGAGCAGTACTTC	peak21	M1_0_F1	0	411	CD8
TGTGCCACCAGCCCCGACAGGGGGCCTTACGAGCAGTACTTC	peak15	M1_0_F1	0	412	CD8
TGTGCCACCAGCCCCTCAGCAGGGGGCTATGGCTACACCTTC	peak21	M1_0_F1	0	413	CD8
TGTGCCACCAGCCGAGGACAGAGCGGCTACAATGAGCAGTTCTTC	peak15	M1_0_F1	0	414	CD8
TGTGCCACCAGCCGCGCAGGGGCCTACGAGCAGTACGTC	peak21	M1_0_F1	0	415	CD8
TGTGCCACCAGCCGCGGGGACGGTACCTACGAGCAGTACGTC	peak21	M1_0_F1	0	416	CD8
TGTGCCACCAGCCGTGGTGTAGGGTTTTACGAGCAGTACGTC	peak10	M1_0_F1	0	417	CD8
TGTGCCACCAGCGCCAGCACAGGGCTTGAGCAGTTCTTC	peak21	M1_0_F1	0	418	CD8
TGTGCCACCAGCGCCCAACAGGGAGCCGGGGAGCTGTTTTTT	peak21	M1_0_F1	0	419	CD8
TGTGCCACCAGCGCTGGGCCGGAGATGTACGAGCAGTACTTC	peak21	M1_0_F1	0	420	CD8
TGTGCCACCAGCGGACGGCCAGCCGACGAGCAGTACTTC	peak15	M1_0_F1	0	421	CD8
TGTGCCACCAGCGGAGGGGGCGGGTACGAGCAGTACGTC	peak21	M1_0_F1	0	422	CD8
TGTGCCACCAGCGGAGGGGTGGGTTACGAGCAGTACGTC	peak15	M1_0_F1	0	423	CD8
TGTGCCACCAGCGGATCTACAGGTCAGCCCCAGCATTTT	peak15	M1_0_F1	0	424	CD8
TGTGCCACCAGCGGGGCCACTGGGGGATATGAGCAGTTCTTC	peak15	M1_0_F1	0	425	CD8
TGTGCCACCAGCGGGTCCGGCAACTACGAGCAGTACTTC	peak21	M1_0_F1	0	426	CD8
TGTGCCACCAGCGTGACAGGGGGGAATTCACCCCTCCACTTT	peak21	M1_0_F1	0	427	CD8
TGTGCCACCAGCTCCCGGGCAATGCCTGCCCTAGATACGCAGTATTTT	peak10	M1_0_F1	0	428	CD8
TGTGCCACCAGTCCTGGTACGGCCTACGAGCAGTACTTC	peak21	M1_0_F1	0	429	CD8
TGTGCCACCAGTCGGGGAGCAGATACGCAGTATTTT	peak10	M1_0_F1	0	430	CD8
TGTGCCACCAGTGACAGCCAACTAGCGGGGGGCCACAATGAGCAGTTCTTC	peak10	M1_0_F1	0	431	CD8
TGTGCCACCAGTGAGCCCGGGACAGCAGATACGCAGTATTTT	peak10	M1_0_F1	0	432	CD8
TGTGCCACCAGTGATCCGGGACAGGGTGAGAATGAGCAGTTCTTC	peak5	M1_0_F1	0	433	CD4
TGTGCCACCAGTGATTTCACTAGCACAGATACGCAGTATTTT	peak5	M1_0_F1	0	434	CD8
TGTGCCACCAGTGGCCCCGACGAGGCTTCACCCCTCCACTTT	peak15	M1_0_F1	0	435	CD8
TGTGCCACCAGTTATGAGAGGAACACTGAAGCTTTCTTT	peak21	M1_0_F1	0	436	CD8
TGTGCCACCAGTTCCGGGGGGGCCCCCTACAATGAGCAGTTCTTC	peak15	M1_0_F1	0	437	CD8
TGTGCCACCCAGGGGGCAGCCGGGGAGCTGTTTTTT	peak15	M1_0_F1	0	438	CD8
TGTGCCACCCCGACCGATACGCAGTATTTT	peak21	M1_0_F1	0	439	CD8
TGTGCCACCCTAGCGGGGGGCAGCTACGAGCAGTACTTC	peak15	M1_0_F1	0	440	CD8
TGTGCCACCGACCCGTGGAACACCGGGGAGCTGTTTTTT	peak10	M1_0_F1	0	441	CD4
TGTGCCACCGCCCCGGGACAGGGTGTTTTTCATGAGCAGTTCTTC	peak15	M1_0_F1	0	442	CD8
TGTGCCACCGCGATGGGGGCGGCTAACAATGAGCAGTTCTTC	peak15	M1_0_F1	0	443	CD8
TGTGCCACCGGAGTCAGTGCGAAACCAGATACGCAGTATTTT	peak21	M1_0_F1	0	444	CD8
TGTGCCACCTCAGGGGCGGGTAATCAGCCCCAGCATTTT	peak15	M1_0_F1	0	445	CD4
TGTGCCACCTCAGGGGGTGGCAATCAGCCCCAGCATTTT	peak21	M1_0_F1	0	446	CD4
TGTGCCACCTCTGGGGCCGCGTCCTACGAGCAGTACTTC	peak21	M1_0_F1	0	447	CD8
TGTGCCACCTTCCCGCCGGAGTCTATCACAGATACGCAGTATTTT	peak15	M1_0_F1	0	448	CD4
TGTGCCACGAGCGCCTCTACAGCCGATGAGCAGTTCTTC	peak21	M1_0_F1	0	449	CD8
TGTGCCACTGGGATGTGGGGGAATGAGCAGTTCTTC	peak15	M1_0_F1	0	450	CD8
TGTGCCACTTGCCCGGCAGCCAATCAGCCCCAGCATTTT	peak15	M1_0_F1	0	451	CD8
TGTGCCAGACAGCCTAACTATGGCTACACCTTC	peak15	M1_0_F1	0	452	CD8
TGTGCCAGAGTCGTCGGGAATACAGGGCCCCCCTTTGCAACTAATGAAAAACTGTTTTTT	peak15	M1_0_F1	0	453	CD8
TGTGCCAGCAAAACAGGGGCTTCACCCCTCCACTTT	peak10	M1_0_F1	0	454	CD4
TGTGCCAGCAAAATCGGGGGGGCGGCAGATACGCAGTATTTT	peak15	M1_0_F1	0	455	CD4
TGTGCCAGCAAAGGACAGGGGGCGCTTAATGAGCAGTTCTTC	peak15	M1_0_F1	0	456	CD4
TGTGCCAGCAAAGGACTAGCGGGGGCCCAAAGCTCCTACAATGAGCAGTTCTTC	peak15	M1_0_F1	0	457	CD4
TGTGCCAGCAAAGTTATGGGGGCGGAGGATACGCAGTATTTT	peak15	M1_0_F1	0	458	CD4
TGTGCCAGCAACCAAGCGGGGGGAGTGGCAGAGACCCAGTACTTC	peak15	M1_0_F1	0	459	CD8
TGTGCCAGCAACCCCCCAGGCTACAATGAGCAGTTCTTC	peak15	M1_0_F1	0	460	CD8
TGTGCCAGCAACCCCGCGGGGGGCGAGACCCAGTACTTC	peak21	M1_0_F1	0	461	CD8
TGTGCCAGCAACCGCGGGGGGGCAAATGAGCAGTTCTTC	peak15	M1_0_F1	0	462	CD8
TGTGCCAGCAACCTCCTCTCAGGGGGGATGAGAGATACGCAGTATTTT	peak21	M1_0_F1	0	463	CD8
TGTGCCAGCAACGGGATACACACCGGGGAGCTGTTTTTT	peak15	M1_0_F1	0	464	CD8
TGTGCCAGCAACTACCGACCCGGACAAGAGACCCAGTACTTC	peak15	M1_0_F1	0	465	CD8
TGTGCCAGCAAGACAGGGGGGTTCGGGGAGCTGTTTTTT	peak10	M1_0_F1	0	466	CD8
TGTGCCAGCAAGCCGGGACAGGACTACACCGGGGAGCTGTTTTTT	peak15	M1_0_F1	0	467	CD8
TGTGCCAGCAAGGCCGGAAGGCTAGGAAACACCATATATTTT	peak21	M1_0_F1	0	468	CD4
TGTGCCAGCAATACACAGGGGGGACCTGAAGCTTTCTTT	peak15	M1_0_F1	0	469	CD8
TGTGCCAGCAATGCAGGGGCCGGGAACGAGCAGTACTTC	peak10	M1_0_F1	0	470	CD8
TGTGCCAGCAATGGAGCGGGGGGATACGAGCAGTACTTC	peak15	M1_0_F1	0	471	CD8
TGTGCCAGCACACAGGGACCAGAGACCGGGGAGCTGTTTTTT	peak15	M1_0_F1	0	472	CD8
TGTGCCAGCACAGGACAGGGGGCCTACGAGCAGTACTTC	peak15	M1_0_F1	0	473	CD8
TGTGCCAGCACCAAGAACTTGTGCAGGGGGACGAGCAGTACGTC	peak21	M1_0_F1	0	474	CD8
TGTGCCAGCACCAGCACCGGGACAGGGGCCTATGGCTACACCTTC	peak21	M1_0_F1	0	475	CD8
TGTGCCAGCACCCAAGGGGGGGCCCCCTACAATGAGCAGTTCTTC	peak21	M1_0_F1	0	476	CD8
TGTGCCAGCACCCAGACCGGGGACACCATATATTTT	peak15	M1_0_F1	0	477	CD8
TGTGCCAGCACCCAGGGGAACAGCAACATGAACACTGAAGCTTTCTTT	peak15	M1_0_F1	0	478	CD4
TGTGCCAGCACCCCCGGGACAGAAAGCTACGAGCAGTACTTC	peak21	M1_0_F1	0	479	CD8
TGTGCCAGCACCCCCTTTGGGACGGAAGAGACCCAGTACTTC	peak10	M1_0_F1	0	480	CD4
TGTGCCAGCACCCCGGCCCCTAACACTGAAGCTTTCTTT	peak15	M1_0_F1	0	481	CD8
TGTGCCAGCACCCCGGGACAGGGGTTCTATGAGCAGTTCTTC	peak15	M1_0_F1	0	482	CD8
TGTGCCAGCACCCCGGGGCTGGAAAATTCACCCCTCCACTTT	peak15	M1_0_F1	0	483	CD4
TGTGCCAGCACCCCGGGGGGCGGTCAGCCCCAGCATTTT	peak21	M1_0_F1	0	484	CD8
TGTGCCAGCACCCGAGGAGGGTCAGGAATGAACACTGAAGCTTTCTTT	peak15	M1_0_F1	0	485	CD8
TGTGCCAGCACCCGTCTCCCCGGTTTGGAGCAGTTCTTC	peak15	M1_0_F1	0	486	CD8
TGTGCCAGCACCCTCGGCGCGGGAGGCACCTACGAGCAGTACTTC	peak15	M1_0_F1	0	487	CD8
TGTGCCAGCACCGACAGGGGGTACGAGCAGTACTTC	peak15	M1_0_F1	0	488	CD8
TGTGCCAGCACCGCCGGAGAAACTCATAGCAATCAGCCCCAGCATTTT	peak15	M1_0_F1	0	489	CD4
TGTGCCAGCACCGTGGAGGGCGGTTACAATGAGCAGTTCTTC	peak5	M1_0_F1	0	490	CD8
TGTGCCAGCACCTCCGGACAGGGAGTCTACGAGCAGTACGTC	peak15	M1_0_F1	0	491	CD8
TGTGCCAGCACCTGGGAGGGGGAGCTGTTTTTT	peak5	M1_0_F1	0	492	CD8
TGTGCCAGCACCTTCCTCGGGACAGTCGGAGGGACCCAGTACTTC	peak15	M1_0_F1	0	493	CD4
TGTGCCAGCACCTTCGGACAGGGGGGTTCCTACAATGAGCAGTTCTTC	peak15	M1_0_F1	0	494	CD4
TGTGCCAGCACCTTCGGGCAGGGGACGAGCTCCTACGAGCAGTACTTC	peak10	M1_0_F1	0	495	CD4
TGTGCCAGCACCTTGGAAGGGTCACCCCTCCACTTT	peak15	M1_0_F1	0	496	CD4
TGTGCCAGCACGACAGGGCTTACCTACAATGAGCAGTTCTTC	peak15	M1_0_F1	0	497	CD8
TGTGCCAGCACGCTCCGGGGATCCGGGGCCAACGTCCTGACTTTC	peak10	M1_0_F1	0	498	CD4
TGTGCCAGCACGGACGGGGCCCTTAATTCACCCCTCCACTTT	peak15	M1_0_F1	0	499	CD8
TGTGCCAGCACGGTGGGAGGGGTGGCATACAATGAGCAGTTCTTC	peak21	M1_0_F1	0	500	CD8
TGTGCCAGCACTGAGCGGGGGGGCTCCTACAATGAGCAGTTCTTC	peak21	M1_0_F1	0	501	CD8
TGTGCCAGCAGAAAGACTAGCGGGGGATGGATGGAGCAGTACGTC	peak15	M1_0_F1	0	502	CD8
TGTGCCAGCAGAAATATGAACACTGAAGCTTTCTTT	peak10	M1_0_F1	0	503	CD4
TGTGCCAGCAGAAATGGCAGGAGCTCCTACAATGAGCAGTTCTTC	peak15	M1_0_F1	0	504	CD4
TGTGCCAGCAGAAGACAGGGGGCACCTAATGAAAAACTGTTTTTT	peak15	M1_0_F1	0	505	CD8
TGTGCCAGCAGACAACAGGATTCACCCCTCCACTTT	peak15	M1_0_F1	0	506	CD4
TGTGCCAGCAGACACACTATACGAGGGGAGACCCAGTACTTC	peak10	M1_0_F1	1.03e-06	507	CD4
TGTGCCAGCAGACCACAACAGGGGAAGGGGTCCTACGAGCAGTACTTC	peak15	M1_0_F1	0	508	CD8
TGTGCCAGCAGACCCCATGGCGGGGGGACCCCAGGTGAGCAGTTCTTC	peak15	M1_0_F1	0	509	CD4
TGTGCCAGCAGACCCGGGACAGCGACCTACGAGCAGTACTTC	peak10	M1_0_F1	0	510	CD4
TGTGCCAGCAGACCGGGATCTATTGATTCACCCCTCCACTTT	peak15	M1_0_F1	0	511	CD4
TGTGCCAGCAGAGCAGGGGCCACAGATACGCAGTATTTT	peak15	M1_0_F1	0	512	CD8
TGTGCCAGCAGAGCCACCCGTAACTATGGCTACACCTTC	peak10	M1_0_F1	0	513	CD4
TGTGCCAGCAGAGGGACTAGCGGCTACAATGAGCAGTTCTTC	peak21	M1_0_F1	0	514	CD8
TGTGCCAGCAGATACGGGACAGTCAACACCGGGGAGCTGTTTTTT	peak21	M1_0_F1	0	515	CD4
TGTGCCAGCAGATCCGGGGGCCGGGGAGAGACCCAGTACTTC	peak10	M1_0_F1	0	516	CD8
TGTGCCAGCAGATCTGAATCCGGGGGTGGTCAGCCCCAGCATTTT	peak15	M1_0_F1	0	517	CD8
TGTGCCAGCAGATTTGGACAGGGGAGAGAAAACATTCAGTACTTC	peak15	M1_0_F1	0	518	CD4
TGTGCCAGCAGCAAACAGGGCGAGAACACTGAAGCTTTCTTT	peak15	M1_0_F1	0	519	CD4
TGTGCCAGCAGCAAACAGGGGGAGAACACTGAAGCTTTCTTT	peak15	M1_0_F1	0	520	CD4
TGTGCCAGCAGCAAAGCCGACAGGAACAAAAACATTCAGTACTTC	peak15	M1_0_F1	0	521	CD4
TGTGCCAGCAGCAAAGGACAGGCCTACGAGCAGTACTTC	peak15	M1_0_F1	0	522	CD8
TGTGCCAGCAGCAACCCCGAGGAAGAGACCCAGTACTTC	peak21	M1_0_F1	0	523	CD8
TGTGCCAGCAGCAATTCGTTAGACAGGGGCTATAATTCACCCCTCCACTTT	peak15	M1_0_F1	0	524	CD4
TGTGCCAGCAGCACACAACAGCCCCTTGGTGTCGGGGAGCTGTTTTTT	peak10	M1_0_F1	0	525	CD8
TGTGCCAGCAGCACCAGACTAGCGGGGGGCACAGATACGCAGTATTTT	peak10	M1_0_F1	0	526	CD4
TGTGCCAGCAGCACCCGGGACAGGCTGAACACTGAAGCTTTCTTT	peak15	M1_0_F1	0	527	CD8
TGTGCCAGCAGCACCGCCCAGAGGGGGGTTGAAGCTTTCTTT	peak21	M1_0_F1	0	528	CD8
TGTGCCAGCAGCACCGGGGGGGTGCCGTACAATGAGCAGTTCTTC	peak10	M1_0_F1	0	529	CD8
TGTGCCAGCAGCACTCAGGCTTACGAGCAGTACGTC	peak10	M1_0_F1	0	530	CD4
TGTGCCAGCAGCAGAGGGACAGGGGCCTACGAGCAGTACTTC	peak15	M1_0_F1	0	531	CD8
TGTGCCAGCAGCAGAGGGGAGGGGGCTTCCTACAATGAGCAGTTCTTC	peak10	M1_0_F1	0	532	CD8
TGTGCCAGCAGCAGCAGCGGGGGGGCACCGGTCGTAGGGTTCTTC	peak10	M1_0_F1	0	533	CD8
TGTGCCAGCAGCAGGGGTGGGGACAGGACGCACGAGCAGTACTTC	peak15	M1_0_F1	0	534	CD8
TGTGCCAGCAGCATACAGGGAACCGGGGAGCTGTTTTTT	peak15	M1_0_F1	0	535	CD4
TGTGCCAGCAGCATACCGACAGAAAACGGGGAGCTGTTTTTT	peak15	M1_0_F1	0	536	CD4
TGTGCCAGCAGCATACCGACAGAGAACACTGAAGCTTTCTTT	peak21	M1_0_F1	0	537	CD4
TGTGCCAGCAGCATACTAGCGGGGGGACTCTACGAGCAGTACTTC	peak10	M1_0_F1	0	538	CD8
TGTGCCAGCAGCATACTAGCGGGGGGGAACAATGAGCAGTTCTTC	peak10	M1_0_F1	0	539	CD8
TGTGCCAGCAGCATAGACGGCCTTCCCTACAATGAGCAGTTCTTC	peak21	M1_0_F1	0	540	CD8
TGTGCCAGCAGCATAGGACTAGGAGGCACAAGTGAGCAGTTCTTC	peak15	M1_0_F1	0	541	CD8
TGTGCCAGCAGCATCCTAGCGGGGGAAGCCTTAGACGAGCAGTACTTC	peak15	M1_0_F1	0	542	CD8
TGTGCCAGCAGCATGACACCCAACAATGAGCAGTTCTTC	peak15	M1_0_F1	0	543	CD8
TGTGCCAGCAGCATGGGAGTTCCGTACGAGCAGTACTTC	peak21	M1_0_F1	0	544	CD8
TGTGCCAGCAGCCAAAATGTAGGACAGGGGACTGAAGCTTTCTTT	peak15	M1_0_F1	0	545	CD8
TGTGCCAGCAGCCAAACCCTTTCAACCGTCTACGAGCAGTACTTC	peak21	M1_0_F1	0	546	CD8
TGTGCCAGCAGCCAAACGACTAGCGGGCGGGAGCAGTACTTC	peak15	M1_0_F1	0	547	CD4
TGTGCCAGCAGCCAAACTAGCGTTGCCTACGAGCAGTACTTC	peak15	M1_0_F1	0	548	CD8
TGTGCCAGCAGCCAAATGGGGTACAATGAGCAGTTCTTC	peak15	M1_0_F1	0	549	CD4
TGTGCCAGCAGCCAAGAACCGGAGACATACGGGCAGTTCTTC	peak15	M1_0_F1	0	550	CD8
TGTGCCAGCAGCCAAGAAGGACCATCCCGCGAGCAGTACTTC	peak21	M1_0_F1	0	551	CD8
TGTGCCAGCAGCCAAGAAGGCCGGGGAGCTTTCTTT	peak21	M1_0_F1	0	552	CD8
TGTGCCAGCAGCCAAGAAGGGATAGCGCGAGAGCAGTACTTC	peak10	M1_0_F1	0	553	CD8
TGTGCCAGCAGCCAAGAAGGTTCCGCGGGGTTGGAGACCCAGTACTTC	peak15	M1_0_F1	0	554	CD8
TGTGCCAGCAGCCAAGAATCGACTAGCGGGGGGGTACCGAAGTACTTC	peak21	M1_0_F1	0	555	CD8
TGTGCCAGCAGCCAAGACGAGGCCAGGGCTTTCTACTTC	peak15	M1_0_F1	0	556	CD4
TGTGCCAGCAGCCAAGACGGGAGAAAACTGTTTTTT	peak15	M1_0_F1	0	557	CD4
TGTGCCAGCAGCCAAGACGGGCGGCAGGAAGTCTTC	peak15	M1_0_F1	0	558	CD4
TGTGCCAGCAGCCAAGACGGGTTGAAGCAGTTCTTC	peak15	M1_0_F1	0	559	CD4
TGTGCCAGCAGCCAAGAGAACAGGGGGCCTTCACCCCTCCACTTT	peak21	M1_0_F1	0	560	CD8
TGTGCCAGCAGCCAAGAGAGCACCAACTACAATGAGCAGTTCTTC	peak15	M1_0_F1	0	561	CD8
TGTGCCAGCAGCCAAGAGAGGACCGTACCTTTACGAGCAGTACTTC	peak21	M1_0_F1	0	562	CD8
TGTGCCAGCAGCCAAGAGGAGACACCCTGGTCGACCCAGTACTTC	peak15	M1_0_F1	0	563	CD8
TGTGCCAGCAGCCAAGAGGATACAGGGAGTGCCAACGTCCTGACTTTC	peak15	M1_0_F1	0	564	CD8
TGTGCCAGCAGCCAAGAGGGGCCAGGGACCCAGTACTTC	peak10	M1_0_F1	0	565	CD4
TGTGCCAGCAGCCAAGAGTCAGTCTCCTACAATGAGCAGTTCTTC	peak21	M1_0_F1	0	566	CD8
TGTGCCAGCAGCCAAGATATCTTCTATGGCTACACCTTC	peak10	M1_0_F1	0	567	CD8
TGTGCCAGCAGCCAAGATCAGACAGGGGGCTATTATTCACCCCTCCACTTT	peak15	M1_0_F1	0	568	CD4
TGTGCCAGCAGCCAAGATCCCGGACTAGCGACAGATACGCAGTATTTT	peak10	M1_0_F1	0	569	CD8
TGTGCCAGCAGCCAAGATCCTAGCGGGGTACTACAAGAGACCCAGTACTTC	peak15	M1_0_F1	0	570	CD8
TGTGCCAGCAGCCAAGATCGAGAGGAGATCTCCTATAATTCACCCCTCCACTTT	peak10	M1_0_F1	0	571	CD4
TGTGCCAGCAGCCAAGATCGGGAGGGGGAGTTCTAATCAGCCCCAGCATTTT	peak21	M1_0_F1	0	572	CD8
TGTGCCAGCAGCCAAGATCGGGGGGCGCTTGAGCAGTTCTTC	peak15	M1_0_F1	0	573	CD8
TGTGCCAGCAGCCAAGATCTGTGGACTAGCGGACAGCAGTTCTTC	peak15	M1_0_F1	0	574	CD4
TGTGCCAGCAGCCAAGATCTGTTGGGAATTTATGGCTACACCTTC	peak15	M1_0_F1	0	575	CD8
TGTGCCAGCAGCCAAGATGACAGGGGGCTGTTTTTT	peak15	M1_0_F1	0	576	CD4
TGTGCCAGCAGCCAAGATGGCAGGCGCTACACCTTC	peak15	M1_0_F1	0	577	CD4
TGTGCCAGCAGCCAAGATGGGCGCGGAGCTTTCTTT	peak15	M1_0_F1	0	578	CD4
TGTGCCAGCAGCCAAGATGGGCGGAGTCAGTTCTTC	peak15	M1_0_F1	0	579	CD4
TGTGCCAGCAGCCAAGATGGGCGTCCTGAGACCCAGTACTTC	peak15	M1_0_F1	0	580	CD4
TGTGCCAGCAGCCAAGATGGGGAGACCCAGTACTTC	peak15	M1_0_F1	0	581	CD4
TGTGCCAGCAGCCAAGATGTGGCAGGGGGCTATGGCTACACCTTC	peak21	M1_0_F1	0	582	CD8
TGTGCCAGCAGCCAAGATTATTACGCGGGGGGGCCTCAAGAGACCCAGTACTTC	peak15	M1_0_F1	0	583	CD8
TGTGCCAGCAGCCAAGATTCCCCAGTCTACAATGAGCAGTTCTTC	peak15	M1_0_F1	0	584	CD8
TGTGCCAGCAGCCAAGATTCGAGCGGGGACGACGAGCAGTACTTC	peak15	M1_0_F1	0	585	CD8
TGTGCCAGCAGCCAAGATTCTGGGGCCAACGTCCTGACTTTC	peak15	M1_0_F1	2.05e-06	586	CD4
TGTGCCAGCAGCCAAGATTTGGGGACAGCTAGTCAGCCCCAGCATTTT	peak15	M1_0_F1	0	587	CD4
TGTGCCAGCAGCCAAGCCACTGCGTACGAGCAGTACTTC	peak15	M1_0_F1	0	588	CD8
TGTGCCAGCAGCCAAGCCGGGACAGCCTACGAGCAGTACTTC	peak10	M1_0_F1	0	589	CD8
TGTGCCAGCAGCCAAGGAAACCGAGGAGGCTACGAGCAGTACTTC	peak15	M1_0_F1	0	590	CD8
TGTGCCAGCAGCCAAGGACAGGGGGAAGAGACCCAGTACTTC	peak15	M1_0_F1	0	591	CD8
TGTGCCAGCAGCCAAGGACAGGGGGCCTACGAGCAGTACTTC	peak21	M1_0_F1	0	592	CD8
TGTGCCAGCAGCCAAGGAGCACTAGCGGGGGCCTACGAGCAGTACTTC	peak15	M1_0_F1	0	593	CD8
TGTGCCAGCAGCCAAGGAGGGCAGATAGGCAATGAGCAGTTCTTC	peak15	M1_0_F1	0	594	CD4
TGTGCCAGCAGCCAAGGATTTAGCGCCACAGTACTACACGAGACCCAGTACTTC	peak15	M1_0_F1	0	595	CD4
TGTGCCAGCAGCCAAGGGGAGTACGAGCAGTACTTC	peak21	M1_0_F1	0	596	CD8
TGTGCCAGCAGCCAAGGGGCGGCCTCATTCTGGGAGACCCAGTACTTC	peak15	M1_0_F1	0	597	CD4
TGTGCCAGCAGCCAAGGGGCTACGTTCTCCTACGAGCAGTACTTC	peak21	M1_0_F1	0	598	CD8
TGTGCCAGCAGCCAAGGGGGCTCTTCGCAGGCTTTCTTT	peak21	M1_0_F1	0	599	CD8
TGTGCCAGCAGCCAAGGGTCTAGGGGTTATAATTCACCCCTCCACTTT	peak15	M1_0_F1	0	600	CD4
TGTGCCAGCAGCCAAGGTTCGGGGGGCAATGGCTACACCTTC	peak21	M1_0_F1	0	601	CD8
TGTGCCAGCAGCCAAGTAACCCCTGGCAGGGGGTACACAGATACGCAGTATTTT	peak15	M1_0_F1	0	602	CD4
TGTGCCAGCAGCCAAGTAGCGGGGGGCAACAATGAGCAGTTCTTC	peak15	M1_0_F1	0	603	CD8
TGTGCCAGCAGCCAAGTCGGGGGACAGAACACCGGGGAGCTGTTTTTT	peak10	M1_0_F1	0	604	CD4
TGTGCCAGCAGCCAAGTGAATAGCGGGGGGCCCGGGGAGCTGTTTTTT	peak15	M1_0_F1	0	605	CD8
TGTGCCAGCAGCCAAGTGGGGCAGGCGTTCTCTGGAAACACCATATATTTT	peak15	M1_0_F1	0	606	CD4
TGTGCCAGCAGCCAAGTGTCCGGGGAGCTGTTTTTT	peak15	M1_0_F1	0	607	CD4
TGTGCCAGCAGCCAATACCTCCCGGGACTAGCGGGGGTTGACTCCTACAATGAGCAGTTCTTC	peak21	M1_0_F1	0	608	CD8
TGTGCCAGCAGCCACAGACAGGGTCCACTGAAGCTTTCTTT	peak21	M1_0_F1	0	609	CD8
TGTGCCAGCAGCCACCCCGGGGCAGAACAGTTCTTC	peak15	M1_0_F1	0	611	CD8
TGTGCCAGCAGCCACCGGGACAGGGGAGCGGAGACCCAGTACTTC	peak21	M1_0_F1	0	612	CD8
TGTGCCAGCAGCCACGAGACAAACACTGAAGCTTTCTTT	peak21	M1_0_F1	0	613	CD8
TGTGCCAGCAGCCACGAGACCCAAGAGACCCAGTACTTC	peak15	M1_0_F1	0	614	CD8
TGTGCCAGCAGCCACGGACAAATGGGCCAGCCCCAGCATTTT	peak15	M1_0_F1	0	615	CD8
TGTGCCAGCAGCCACGGCGGGGTGGCCTACGAGCAGTACTTC	peak15	M1_0_F1	0	616	CD8
TGTGCCAGCAGCCACGGGGGAGCCTACGAGCAGTACTTC	peak15	M1_0_F1	0	617	CD8
TGTGCCAGCAGCCACTACCCCGGGACAGGGAGCGATGGCTACACCTTC	peak15	M1_0_F1	0	618	CD8
TGTGCCAGCAGCCAGACAGGGTCCCACGAGCAGTACTTC	peak15	M1_0_F1	0	619	CD8
TGTGCCAGCAGCCAGGATGGACGGGTCCAAACCTTC	peak15	M1_0_F1	0	620	CD4
TGTGCCAGCAGCCAGGGACAGGGGTCCTACGAGCAGTACTTC	peak15	M1_0_F1	0	621	CD8
TGTGCCAGCAGCCAGGGACTAGCGGGGAGCTCCTACAATGAGCAGTTCTTC	peak15	M1_0_F1	0	622	CD4
TGTGCCAGCAGCCAGGGCACAGATACGCAGTATTTT	peak15	M1_0_F1	0	623	CD8
TGTGCCAGCAGCCAGGGCCCAGTTGCGAGCCCAGATACGCAGTATTTT	peak10	M1_0_F1	0	624	CD8
TGTGCCAGCAGCCAGGGCGACAGGACGTACGAAGCTTTCTTT	peak15	M1_0_F1	0	625	CD8
TGTGCCAGCAGCCAGGGGGAACGGCTCTACAATGAGCAGTTCTTC	peak21	M1_0_F1	0	626	CD8
TGTGCCAGCAGCCAGGGGGGGGTGGACTCAGATACGCAGTATTTT	peak10	M1_0_F1	0	627	CD4
TGTGCCAGCAGCCAGGGTTACTACAATGAGCAGTTCTTC	peak21	M1_0_F1	0	628	CD4
TGTGCCAGCAGCCATACAGGGGTTAGCACTGAAGCTTTCTTT	peak15	M1_0_F1	0	629	CD8
TGTGCCAGCAGCCATACAGGTTGGGAGTACTTC	peak15	M1_0_F1	0	630	CD8
TGTGCCAGCAGCCATCCTTCGGGACTGGGGATTGGGGAGCAGTACGTC	peak15	M1_0_F1	0	631	CD8
TGTGCCAGCAGCCATCGGACAGGGGGCGAGCAGTACTTC	peak15	M1_0_F1	0	632	CD8
TGTGCCAGCAGCCATGACCGGGACAGGGCGACGAACGGCTATGGCTACACCTTC	peak21	M1_0_F1	0	633	CD8
TGTGCCAGCAGCCATGACGATCAGCCCCAGCATTTT	peak5	M1_0_F1	0	634	CD4
TGTGCCAGCAGCCATGAGACAGGGGGCACCGGGGAGCTGTTTTTT	peak15	M1_0_F1	0	635	CD8
TGTGCCAGCAGCCATGGCAGTACAAGCAATCAGCCCCAGCATTTT	peak21	M1_0_F1	0	636	CD8
TGTGCCAGCAGCCATGGGGACAGGGAAAATTCACCCCTCCACTTT	peak15	M1_0_F1	0	637	CD4
TGTGCCAGCAGCCCAAATTTCGGGTCCTACGAGCAGTACTTC	peak15	M1_0_F1	0	638	CD4
TGTGCCAGCAGCCCAAGGGACAGGGTACTGTACGAGCAGTACTTC	peak15	M1_0_F1	0	639	CD8
TGTGCCAGCAGCCCAAGGGGGTTAGCGGGGGGGGTAAGCAATGAGCAGTTCTTC	peak15	M1_0_F1	0	640	CD4
TGTGCCAGCAGCCCACAGACCGGGGAGCTGTTTTTT	peak15	M1_0_F1	0	641	CD4
TGTGCCAGCAGCCCACAGGGCGACACTGAAGCTTTCTTT	peak15	M1_0_F1	0	642	CD8
TGTGCCAGCAGCCCACAGGGCGCCTACGAGCAGTACTTC	peak15	M1_0_F1	0	643	CD8
TGTGCCAGCAGCCCACCTTCGGGACTCAACACCGGGGAGCTGTTTTTT	peak15	M1_0_F1	0	644	CD8
TGTGCCAGCAGCCCACGACAGGGGGCAGGGCCCCTCCACTTT	peak21	M1_0_F1	0	645	CD8
TGTGCCAGCAGCCCACGGGACAGGCTTTTCTACGAGCAGTACTTC	peak10	M1_0_F1	0	646	CD8
TGTGCCAGCAGCCCACGGGACAGGTTGAACACTGAAGCTTTCTTT	peak15	M1_0_F1	0	647	CD8
TGTGCCAGCAGCCCACTGGCGGACCTCCTCTATGGCTACACCTTC	peak5	M1_0_F1	0	648	CD4
TGTGCCAGCAGCCCAGACAGCGCCAGCCATGAAAAACTGTTTTTT	peak15	M1_0_F1	0	649	CD4
TGTGCCAGCAGCCCAGACGCCGGGACAGCCTACGAGCAGTACTTC	peak21	M1_0_F1	0	650	CD8
TGTGCCAGCAGCCCAGACTATCAACCCTACGAGCAGTACGTC	peak15	M1_0_F1	0	651	CD4
TGTGCCAGCAGCCCAGAGAATAGCAATCAGCCCCAGCATTTT	peak21	M1_0_F1	0	652	CD8
TGTGCCAGCAGCCCAGGACAGGACAGGCTGTACTTC	peak5	M1_0_F1	0	653	CD4
TGTGCCAGCAGCCCAGGAGGGGCCACTGAAGCTTTCTTT	peak21	M1_0_F1	0	654	CD8
TGTGCCAGCAGCCCAGGCGCGGGGGGCCAATACAATGAGCAGTTCTTC	peak15	M1_0_F1	0	655	CD8
TGTGCCAGCAGCCCAGGGACTGACAGCTCTGGAAACACCATATATTTT	peak15	M1_0_F1	0	656	CD8
TGTGCCAGCAGCCCAGGGGACAGACAATACAATGAGCAGTTCTTC	peak10	M1_0_F1	0	657	CD8
TGTGCCAGCAGCCCAGGGGCAGGTGCTGAAGCTTTCTTT	peak21	M1_0_F1	0	658	CD8
TGTGCCAGCAGCCCAGGGGGGGTGGGTTACAATGAGCAGTTCTTC	peak15	M1_0_F1	0	659	CD8
TGTGCCAGCAGCCCATCAACTAGCGGGGCCTCCTACGAGCAGTACGTC	peak21	M1_0_F1	0	660	CD8
TGTGCCAGCAGCCCATCCCTAGGGGGGGCATATGGCTACACCTTC	peak21	M1_0_F1	0	661	CD8
TGTGCCAGCAGCCCCAACTACGATGGCTACACCTTC	peak15	M1_0_F1	0	662	CD8
TGTGCCAGCAGCCCCAATCTACAGGGGGCGTGGGGCTACACCTTC	peak15	M1_0_F1	0	663	CD8
TGTGCCAGCAGCCCCACCGGGGGCCAGCCCCAGCATTTT	peak10	M1_0_F1	0	664	CD8
TGTGCCAGCAGCCCCACTTTCGTTGCTGGGGCCAACGTCCTGACTTTC	peak15	M1_0_F1	0	665	CD8
TGTGCCAGCAGCCCCAGGGACAGACTGAACACTGAAGCTTTCTTT	peak15	M1_0_F1	0	666	CD8
TGTGCCAGCAGCCCCATAAGCGGGGGGTACTACGAGCAGTACTTC	peak21	M1_0_F1	0	668	CD8
TGTGCCAGCAGCCCCCACAGGGAACTATGGCTACACCTTC	peak21	M1_0_F1	0	669	CD8
TGTGCCAGCAGCCCCCATAGCGGGGGGACTAGCACAGATACGCAGTATTTT	peak10	M1_0_F1	0	670	CD8
TGTGCCAGCAGCCCCCATGGCGGGGCCGAGCAGTACTTC	peak15	M1_0_F1	0	671	CD8
TGTGCCAGCAGCCCCCCCGCTGGGGGACAGGGGGCTTACGAGCAGTACTTC	peak15	M1_0_F1	0	672	CD8
TGTGCCAGCAGCCCCCCGGGACAGGGGTTTTCCTCCTACGAGCAGTACTTC	peak15	M1_0_F1	0	673	CD8
TGTGCCAGCAGCCCCCGAGACAGACTTAATTCACCCCTCCACTTT	peak15	M1_0_F1	0	674	CD8
TGTGCCAGCAGCCCCCGAGACAGGCTCCACTACGAGCAGTACTTC	peak21	M1_0_F1	0	675	CD8
TGTGCCAGCAGCCCCCGGACAGTAGATGAGCAGTTCTTC	peak21	M1_0_F1	0	676	CD8
TGTGCCAGCAGCCCCCGGGACAGACTAAACACTGAAGCTTTCTTT	peak21	M1_0_F1	0	677	CD8
TGTGCCAGCAGCCCCCGGGACAGACTGAACACTGAAGCTTTCTTT	peak15	M1_0_F1	0	678	CD8
TGTGCCAGCAGCCCCCGGGACAGGCTAACCTACGAGCAGTACTTC	peak21	M1_0_F1	0	679	CD8
TGTGCCAGCAGCCCCCGGGACAGGCTTAACACTGAAGCTTTCTTT	peak15	M1_0_F1	0	680	CD8
TGTGCCAGCAGCCCCCGGGACAGGTTGAACACTGAAGCTTTCTTT	peak15	M1_0_F1	0	681	CD8
TGTGCCAGCAGCCCCCGGGACCGATTGAACACTGAAGCTTTCTTT	peak15	M1_0_F1	0	682	CD8
TGTGCCAGCAGCCCCGACGCTAGCGGGGGGTCTTACAATGAGCAGTTCTTC	peak15	M1_0_F1	0	683	CD8
TGTGCCAGCAGCCCCGCTAGGGGGGAGCAGTACTTC	peak5	M1_0_F1	1.03e-06	684	CD8
TGTGCCAGCAGCCCCGGACTAGCGGTGGATGAGACCCAGTACTTC	peak10	M1_0_F1	0	686	CD8
TGTGCCAGCAGCCCCGGAGGGGAAGCCTATGGCTACACCTTC	peak15	M1_0_F1	0	687	CD8
TGTGCCAGCAGCCCCGGCTCAGGGGGCCGCGGCTACACCTTC	peak15	M1_0_F1	0	688	CD4
TGTGCCAGCAGCCCCGGGACAGCCTACGAGCAGTACTTC	peak10	M1_0_F1	0	689	CD8
TGTGCCAGCAGCCCCGGGACAGGAAGACTGTTTTTT	peak10	M1_0_F1	0	690	CD4
TGTGCCAGCAGCCCCGGGACAGGGAACTATGGCTACACCTTC	peak15	M1_0_F1	0	691	CD8
TGTGCCAGCAGCCCCGGGACAGGGTACGAGCAGTACTTC	peak15	M1_0_F1	1.03e-06	692	CD8
TGTGCCAGCAGCCCCGGGACAGGTCTCAATCAGCCCCAGCATTTT	peak15	M1_0_F1	0	693	CD8
TGTGCCAGCAGCCCCGGGACGGCTCAGCCGGCTGGAAACACCATATATTTT	peak15	M1_0_F1	0	694	CD8
TGTGCCAGCAGCCCCGGGACGGTCTCCTACGAGCAGTACTTC	peak21	M1_0_F1	0	695	CD8
TGTGCCAGCAGCCCCGGGGACAGGCTATACAATGAGCAGTTCTTC	peak10	M1_0_F1	0	696	CD8
TGTGCCAGCAGCCCCGGGGACAGGTTATACAATGAGCAGTTCTTC	peak21	M1_0_F1	0	697	CD8
TGTGCCAGCAGCCCCGGGGCAGGGGCCACCTACGAGCAGTACGTC	peak21	M1_0_F1	0	698	CD8
TGTGCCAGCAGCCCCGGGGCGGCCTACGAGCAGTACTTC	peak15	M1_0_F1	0	699	CD8
TGTGCCAGCAGCCCCGGGGGACAGGGGACCTATGGCTACACCTTC	peak15	M1_0_F1	0	700	CD8
TGTGCCAGCAGCCCCGGGGGAGCCTACGAGCAGTACTTC	peak21	M1_0_F1	0	701	CD8
TGTGCCAGCAGCCCCGGGTGGGCTAGCGGGGGGTCCTTCACAGATACGCAGTATTTT	peak10	M1_0_F1	1.03e-06	702	CD4
TGTGCCAGCAGCCCCGGTTGGGGAAACTATGGCTACACCTTC	peak15	M1_0_F1	0	703	CD8
TGTGCCAGCAGCCCCTCAGGGGGTGCCTATGGCTACACCTTC	peak15	M1_0_F1	0	704	CD8
TGTGCCAGCAGCCCCTTTTCAGGGGAGGATACGCAGTATTTT	peak15	M1_0_F1	0	705	CD4
TGTGCCAGCAGCCCGAACCCCGGGGACAAGCTTTCTTT	peak15	M1_0_F1	0	706	CD8
TGTGCCAGCAGCCCGACAGCTAACAATGAGCAGTTCTTC	peak15	M1_0_F1	0	707	CD8
TGTGCCAGCAGCCCGACAGGGTTGAACACTGAAGCTTTCTTT	peak15	M1_0_F1	1.03e-06	708	CD4
TGTGCCAGCAGCCCGACTAGCACCGGGGAGCTGTTTTTT	peak15	M1_0_F1	0	709	CD4
TGTGCCAGCAGCCCGGAATCTAGCGGGGGGGACAATGAGCAGTTCTTC	peak15	M1_0_F1	0	710	CD8
TGTGCCAGCAGCCCGGACAGTAACACTGAAGCTTTCTTT	peak10	M1_0_F1	0	711	CD4
TGTGCCAGCAGCCCGGACTTGATGGATACGCAGTATTTT	peak15	M1_0_F1	0	712	CD4
TGTGCCAGCAGCCCGGCAACTAATGAAAAACTGTTTTTT	peak15	M1_0_F1	1.03e-06	713	CD4
TGTGCCAGCAGCCCGGCAGGGGGCTACGAGCAGTACGTC	peak21	M1_0_F1	0	714	CD8
TGTGCCAGCAGCCCGGCCGACAGACTCACTGAAGCTTTCTTT	peak15	M1_0_F1	0	715	CD8
TGTGCCAGCAGCCCGGCGAGGGCGTACGAGCAGTACTTC	peak15	M1_0_F1	0	716	CD8
TGTGCCAGCAGCCCGGCGGGGGGGTACGAGCAGTACTTC	peak10	M1_0_F1	0	717	CD8
TGTGCCAGCAGCCCGGCTAGCGCCGAGGGTTACGAGCAGTACTTC	peak15	M1_0_F1	0	718	CD8
TGTGCCAGCAGCCCGGGACAGGGGGCCTACGAGCAGTACTTC	peak15	M1_0_F1	1.03e-06	719	CD8
TGTGCCAGCAGCCCGGGACCGGTAAACACTGAAGCTTTCTTT	peak21	M1_0_F1	0	720	CD8
TGTGCCAGCAGCCCGGGACTAGCCTTTGAGACCCAGTACTTC	peak15	M1_0_F1	0	721	CD4
TGTGCCAGCAGCCCGGGACTAGCTTACGAGCAGTACTTC	peak15	M1_0_F1	0	722	CD8
TGTGCCAGCAGCCCGGGGCCCTACACAGATACGCAGTATTTT	peak15	M1_0_F1	0	723	CD4
TGTGCCAGCAGCCCGGGGGAAGGAACGAACTATGGCTACACCTTC	peak21	M1_0_F1	0	724	CD8
TGTGCCAGCAGCCCGGGGGAGGGGGCTCTCTACAATGAGCAGTTCTTC	peak10	M1_0_F1	0	725	CD8
TGTGCCAGCAGCCCGGGGGATGGGCCCTACAATGAGCAGTTCTTC	peak10	M1_0_F1	0	726	CD8
TGTGCCAGCAGCCCGGGGGGCCCTCTCTACAATGAGCAGTTCTTC	peak15	M1_0_F1	0	727	CD8
TGTGCCAGCAGCCCGGGGGGGGCCTACGAGCAGTACTTC	peak15	M1_0_F1	0	728	CD8
TGTGCCAGCAGCCCGTACCGGTACGGGGGGCAAGAGACCCAGTACTTC	peak10	M1_0_F1	0	729	CD4
TGTGCCAGCAGCCCGTACGGGGCCTACGTAGATACGCAGTATTTT	peak15	M1_0_F1	0	730	CD4
TGTGCCAGCAGCCCTAACCCCCATTTCTCCTATAATTCACCCCTCCACTTT	peak15	M1_0_F1	0	731	CD8
TGTGCCAGCAGCCCTAGCGGGGCTCTAAATACGCAGTATTTT	peak15	M1_0_F1	0	732	CD4
TGTGCCAGCAGCCCTAGGAGGACTAGCACAGATACGCAGTATTTT	peak15	M1_0_F1	0	733	CD4
TGTGCCAGCAGCCCTCGGGACAGAATTAATTCACCCCTCCACTTT	peak15	M1_0_F1	0	734	CD8
TGTGCCAGCAGCCCTCGGGACAGACTGAACACTGAAGCTTTCTTT	peak15	M1_0_F1	0	735	CD8
TGTGCCAGCAGCCCTCGGTTAGCGGGGGGGGATGAGCAGTTCTTC	peak15	M1_0_F1	0	736	CD4
TGTGCCAGCAGCCCTCTCAGCGGGGGGAACACCGGGGAGCTGTTTTTT	peak10	M1_0_F1	0	737	CD8
TGTGCCAGCAGCCCTGCCCCCGCGTACGAGCAGTACTTC	peak10	M1_0_F1	0	738	CD8
TGTGCCAGCAGCCCTGGCGGACGGATTTACAATGAGCAGTTCTTC	peak21	M1_0_F1	0	739	CD8
TGTGCCAGCAGCCCTGGGGAGCGACTATACAATGAGCAGTTCTTC	peak15	M1_0_F1	0	740	CD8
TGTGCCAGCAGCCCTGGGGGGCGCGGGGGGGCCTGGGATACGCAGTATTTT	peak15	M1_0_F1	0	741	CD8
TGTGCCAGCAGCCCTGGTGGGACAGGGACCTACGAGCAGTACTTC	peak21	M1_0_F1	0	742	CD8
TGTGCCAGCAGCCCTTATAATTCACCCCTCCACTTT	peak15	M1_0_F1	0	743	CD4
TGTGCCAGCAGCCCTTATGATCAGCCCCAGCATTTT	peak15	M1_0_F1	0	744	CD4
TGTGCCAGCAGCCGAACCGGGCCAAACACTGAAGCTTTCTTT	peak15	M1_0_F1	0	745	CD8
TGTGCCAGCAGCCGAAGCGCAGCGGGGGGCACTAGCACAGATACGCAGTATTTT	peak15	M1_0_F1	0	746	CD8
TGTGCCAGCAGCCGACAGGCGTCGGGGAACACTGAAGCTTTCTTT	peak10	M1_0_F1	0	747	CD4
TGTGCCAGCAGCCGACAGGGAGGGTACGAGCAGTACTTC	peak15	M1_0_F1	0	748	CD8
TGTGCCAGCAGCCGACAGGGGTTTCGCACTGAAGCTTTCTTT	peak15	M1_0_F1	0	749	CD4
TGTGCCAGCAGCCGACCGGACACAAACACTGAAGCTTTCTTT	peak15	M1_0_F1	0	750	CD4
TGTGCCAGCAGCCGACTGGGACGAACTAATGAAAAACTGTTTTTT	peak15	M1_0_F1	0	751	CD4
TGTGCCAGCAGCCGAGGCCCGGGACAGGCCTACGAGCAGTACTTC	peak15	M1_0_F1	0	752	CD8
TGTGCCAGCAGCCGAGGCCGGAACACTGAAGCTTTCTTT	peak21	M1_0_F1	0	753	CD8
TGTGCCAGCAGCCGAGGGGAGGGGCGAAACTACAATGAGCAGTTCTTC	peak21	M1_0_F1	0	754	CD8
TGTGCCAGCAGCCGAGGGTCGGTGAGAGAGCAGTACTTC	peak15	M1_0_F1	0	755	CD8
TGTGCCAGCAGCCGATACGCCCGGGGGGGGCAGAACACCGGGGAGCTGTTTTTT	peak15	M1_0_F1	0	756	CD4
TGTGCCAGCAGCCGCCCGCCGGGGGTCAGAGAGACCCAGTACTTC	peak5	M1_0_F1	0	757	CD4
TGTGCCAGCAGCCGCCCTTGGGGCCTCTACAATGAGCAGTTCTTC	peak15	M1_0_F1	0	758	CD4
TGTGCCAGCAGCCGCGGCGGGGCACCCTACAATGAGCAGTTCTTC	peak15	M1_0_F1	0	759	CD8
TGTGCCAGCAGCCGCGGGACTAGCGGACCCAATGAGCAGTTCTTC	peak15	M1_0_F1	0	760	CD4
TGTGCCAGCAGCCGCTACCAAGAGACCCAGTACTTC	peak21	M1_0_F1	1.03e-06	761	CD4
TGTGCCAGCAGCCGGGACAGCTACACAGATACGCAGTATTTT	peak15	M1_0_F1	0	762	CD4
TGTGCCAGCAGCCGGGACGGCTACGAGCAGTACTTC	peak15	M1_0_F1	0	763	CD4
TGTGCCAGCAGCCGGGGAATTACCCAAACCTACGAGCAGTACTTC	peak10	M1_0_F1	0	764	CD8
TGTGCCAGCAGCCGGGGATACAATGAGCAGTTCTTC	peak10	M1_0_F1	0	765	CD8
TGTGCCAGCAGCCGGGGCCAGACCGAAGCTTTCTTT	peak15	M1_0_F1	0	766	CD8
TGTGCCAGCAGCCGGGGGGAGGGGGCTTCCTACAATGAGCAGTTCTTC	peak10	M1_0_F1	0	767	CD8
TGTGCCAGCAGCCGGTATAGCAATCAGCCCCAGCATTTT	peak10	M1_0_F1	0	768	CD4
TGTGCCAGCAGCCGTAAACCGCCGGGACAGGTCCGGAACACCGGGGAGCTGTTTTTT	peak21	M1_0_F1	0	769	CD8
TGTGCCAGCAGCCGTAAGACCGGGACAGACGAGCAGTACGTC	peak15	M1_0_F1	0	770	CD4
TGTGCCAGCAGCCGTGACAGCGCCTACGAGCAGTACTTC	peak21	M1_0_F1	0	771	CD8
TGTGCCAGCAGCCGTTCAGGACGGGAAGAGACCCAGTACTTC	peak21	M1_0_F1	0	772	CD8
TGTGCCAGCAGCCTAAGCACAGATACGCAGTATTTT	peak15	M1_0_F1	2.05e-06	773	CD8
TGTGCCAGCAGCCTAATAGGACTAGCGGTTCAAGAGACCCAGTACTTC	peak15	M1_0_F1	0	774	CD8
TGTGCCAGCAGCCTACAGGGATCTGGGGCCAACGTCCTGACTTTC	peak10	M1_0_F1	0	776	CD8
TGTGCCAGCAGCCTACCAACTGAGAACACTGAAGCTTTCTTT	peak15	M1_0_F1	0	777	CD4
TGTGCCAGCAGCCTAGACAGGGGGCGCGGCTACGAGCAGTACGTC	peak15	M1_0_F1	0	778	CD8
TGTGCCAGCAGCCTAGGAGGGATCCCTGTCAATGAGCAGTTCTTC	peak21	M1_0_F1	0	779	CD8
TGTGCCAGCAGCCTAGGAGGGGCCTACGAGCAGTACTTC	peak21	M1_0_F1	0	780	CD8
TGTGCCAGCAGCCTAGGGACAGGGGAAGGCTACACCTTC	peak10	M1_0_F1	0	781	CD4
TGTGCCAGCAGCCTCCCCGGGAGCTACGAGCAGTACTTC	peak15	M1_0_F1	0	782	CD8
TGTGCCAGCAGCCTCCCGGGAGCAGATACGCAGTATTTT	peak15	M1_0_F1	0	783	CD4
TGTGCCAGCAGCCTCCCTGACAGGGTCCCCGGGGAGCTGTTTTTT	peak15	M1_0_F1	0	784	CD8
TGTGCCAGCAGCCTCCGGTCCTCAATGAGCAGTTCTTC	peak10	M1_0_F1	1.03e-06	785	CD4
TGTGCCAGCAGCCTCGATCGGCAAAGAAATGATACAGATACGCAGTATTTT	peak15	M1_0_F1	0	786	CD8
TGTGCCAGCAGCCTCGGACAGAGCACCAGCAATCAGCCCCAGCATTTT	peak21	M1_0_F1	0	787	CD8
TGTGCCAGCAGCCTCGGACAGGGGCCAACCTACGAGCAGTACGTC	peak15	M1_0_F1	0	788	CD8
TGTGCCAGCAGCCTCGGGGGAACCGGGGAGCTGTTTTTT	peak10	M1_0_F1	0	789	CD8
TGTGCCAGCAGCCTCTCCGGGACTAGCGGTCTTACACCGGGGAGCTGTTTTTT	peak21	M1_0_F1	0	790	CD8
TGTGCCAGCAGCCTGACTAGCGGGGGTACAGATACGCAGTATTTT	peak15	M1_0_F1	0	791	CD8
TGTGCCAGCAGCCTGCCCAGGAACACCGGGGAGCTGTTTTTT	peak15	M1_0_F1	0	792	CD4
TGTGCCAGCAGCCTGGACATCGATCAGCCCCAGCATTTT	peak15	M1_0_F1	0	793	CD8
TGTGCCAGCAGCCTGGCCGGGGAGCTGTTTTTT	peak15	M1_0_F1	0	794	CD8
TGTGCCAGCAGCCTGGCTCCGGGCTCCTACGAGCAGTACTTC	peak15	M1_0_F1	0	795	CD8
TGTGCCAGCAGCCTTCCCCCGGAGCGCACAGATACGCAGTATTTT	peak15	M1_0_F1	0	796	CD8
TGTGCCAGCAGCCTTGACGGACACGCAACCTACAATGAGCAGTTCTTC	peak15	M1_0_F1	0	797	CD4
TGTGCCAGCAGCCTTGGGACGGAAACTAACTATGGCTACACCTTC	peak15	M1_0_F1	0	798	CD8
TGTGCCAGCAGCCTTGGGACTAGCGGGGTGTACGAGCAGTACTTC	peak21	M1_0_F1	0	799	CD8
TGTGCCAGCAGCCTTGGGGGGACTAGCACGACGGATACGCAGTATTTT	peak15	M1_0_F1	0	800	CD8
TGTGCCAGCAGCCTTTACACCGGGGAGCTGTTTTTT	peak10	M1_0_F1	1.03e-06	801	CD4
TGTGCCAGCAGCCTTTCAGGGTACAATGAGCAGTTCTTC	peak10	M1_0_F1	0	802	CD8
TGTGCCAGCAGCGAAAAACTAGCGGGGTACAATGAGCAGTTCTTC	peak15	M1_0_F1	0	803	CD4
TGTGCCAGCAGCGAAGCTTTGAACACTGAAGCTTTCTTT	peak15	M1_0_F1	0	804	CD4
TGTGCCAGCAGCGACAGGACAGGGGCCCAGTACTTC	peak15	M1_0_F1	0	805	CD4
TGTGCCAGCAGCGACCGGGACAGGACTAACTATGGCTACACCTTC	peak10	M1_0_F1	0	806	CD8
TGTGCCAGCAGCGACCGGGACAGGCTCCTTAATACGCAGTATTTT	peak21	M1_0_F1	0	807	CD8
TGTGCCAGCAGCGACGGACAGGCCTACAATGAGCAGTTCTTC	peak15	M1_0_F1	0	808	CD8
TGTGCCAGCAGCGACGGACAGGGCCATGGCTACACCTTC	peak15	M1_0_F1	0	809	CD4
TGTGCCAGCAGCGACTCGGAGACCCAGTACTTC	peak15	M1_0_F1	0	810	CD4
TGTGCCAGCAGCGAGACAGGGCTCAATCAGCCCCAGCATTTT	peak15	M1_0_F1	0	811	CD4
TGTGCCAGCAGCGAGAGCCTAGGGACGACGGGTGGCTACACCTTC	peak15	M1_0_F1	0	812	CD8
TGTGCCAGCAGCGAGCCGGGACACCACGAGCAGTACTTC	peak15	M1_0_F1	0	813	CD8
TGTGCCAGCAGCGAGGGACCTAACTACACTGAAGCTTTCTTT	peak15	M1_0_F1	0	814	CD8
TGTGCCAGCAGCGAGGGACTAGCGGGGGGGCCGGCCGGGGAGCTGTTTTTT	peak21	M1_0_F1	0	815	CD8
TGTGCCAGCAGCGAGGGCATCTCCTACAATGAGCAGTTCTTC	peak10	M1_0_F1	0	816	CD8
TGTGCCAGCAGCGAGGGGACTAACTACAATGAGCAGTTCTTC	peak10	M1_0_F1	0	817	CD8
TGTGCCAGCAGCGAGGGGGGGGTCCCCTACAATGAGCAGTTCTTC	peak15	M1_0_F1	0	818	CD8
TGTGCCAGCAGCGAGGGTTCCCCCTACAATGAGCAGTTCTTC	peak15	M1_0_F1	0	819	CD8
TGTGCCAGCAGCGAGTCCTACGAGCAGTACTTC	peak10	M1_0_F1	0	820	CD8
TGTGCCAGCAGCGATCCGGGACAACCCAACAATGAGCAGTTCTTC	peak15	M1_0_F1	0	821	CD8
TGTGCCAGCAGCGATGGGACAAACTCCTACGAGCAGTACTTC	peak10	M1_0_F1	0	822	CD8
TGTGCCAGCAGCGCAGCCGGGAATCAGCCCCAGCATTTT	peak15	M1_0_F1	0	823	CD8
TGTGCCAGCAGCGCAGGACTAGCGGGGGCAGATACGCAGTATTTT	peak15	M1_0_F1	0	824	CD8
TGTGCCAGCAGCGCAGGGACAGGGTCCTACGAGCAGTACTTC	peak15	M1_0_F1	0	825	CD8
TGTGCCAGCAGCGCCCGAGACAGGCTGAACACTGAAGCTTTCTTT	peak21	M1_0_F1	0	826	CD8
TGTGCCAGCAGCGCCCGGGAGAGGCTCGGAGAGACCCAGTACTTC	peak15	M1_0_F1	0	827	CD8
TGTGCCAGCAGCGCCCGTAACAGGGTGGTTGCCAAAAACATTCAGTACTTC	peak15	M1_0_F1	0	828	CD4
TGTGCCAGCAGCGCCGACAGGGTGATCACCGGGGAGCTGTTTTTT	peak21	M1_0_F1	0	829	CD8
TGTGCCAGCAGCGCCGAGGTGGCCGGGGAGCTGTTTTTT	peak15	M1_0_F1	0	830	CD4
TGTGCCAGCAGCGCCGGACTAGAGCTGTACAATGAGCAGTTCTTC	peak15	M1_0_F1	0	831	CD8
TGTGCCAGCAGCGCCGGACTATCTAGCCCCGTCGGGGTCGAGCAGTACTTC	peak15	M1_0_F1	0	832	CD8
TGTGCCAGCAGCGCCGGACTCGCCGAGCAGTTCTTC	peak21	M1_0_F1	0	833	CD8
TGTGCCAGCAGCGCCGGAGGCGGGCCATCCTACGAGCAGTACTTC	peak21	M1_0_F1	0	834	CD8
TGTGCCAGCAGCGCCGGGACAGGCCTGTATAGCAATCAGCCCCAGCATTTT	peak21	M1_0_F1	0	835	CD8
TGTGCCAGCAGCGCCGGGACAGGGGAGGGCAATCAGCCCCAGCATTTT	peak15	M1_0_F1	0	836	CD8
TGTGCCAGCAGCGCCGGGACAGGGTACACTGAAGCTTTCTTT	peak21	M1_0_F1	0	837	CD8
TGTGCCAGCAGCGCCGGGACCCCCTACAATGAGCAGTTCTTC	peak21	M1_0_F1	0	838	CD8
TGTGCCAGCAGCGCCGGGGACAGACTATACGAGCAGTACTTC	peak10	M1_0_F1	0	839	CD8
TGTGCCAGCAGCGCCGGGGGGGATGCTTATGGCTACACCTTC	peak21	M1_0_F1	0	840	CD8
TGTGCCAGCAGCGCCGGGGGGGTCGGATACAATGAGCAGTTCTTC	peak21	M1_0_F1	0	841	CD8
TGTGCCAGCAGCGCCTTGACGACAGCCACAGATACGCAGTATTTT	peak10	M1_0_F1	0	842	CD4
TGTGCCAGCAGCGCGACAGGGGGCTCTCAGCCCCAGCATTTT	peak10	M1_0_F1	0	843	CD4
TGTGCCAGCAGCGCGATGGGAACTGAAGCTTTCTTT	peak15	M1_0_F1	0	844	CD4
TGTGCCAGCAGCGCGGCGGGGGAGGCCTACGAGCAGTACTTC	peak15	M1_0_F1	0	845	CD8
TGTGCCAGCAGCGCGGCTAGCGGGGGGGCGTACGAGCAGTACTTC	peak15	M1_0_F1	0	846	CD8
TGTGCCAGCAGCGCGGGACAACAACCCCTCCCAAGAGCTTTCTTT	peak10	M1_0_F1	0	847	CD8
TGTGCCAGCAGCGCGGGCGACGGATACCTCTACAATGAGCAGTTCTTC	peak15	M1_0_F1	0	848	CD8
TGTGCCAGCAGCGCGGGCGGGGTCCCCTACAATGAGCAGTTCTTC	peak21	M1_0_F1	0	849	CD8
TGTGCCAGCAGCGCTGGGGCACAACCGGTCAATGAGCAGTTCTTC	peak21	M1_0_F1	0	850	CD8
TGTGCCAGCAGCGGAACCGGGGTGACTAGCGCCAAAGAGACCCAGTACTTC	peak21	M1_0_F1	0	851	CD8
TGTGCCAGCAGCGGACAGGGGGCGTACGAGCAGTACTTC	peak21	M1_0_F1	0	852	CD8
TGTGCCAGCAGCGGACTCCAAGAGACCCAGTACTTC	peak15	M1_0_F1	0	853	CD4
TGTGCCAGCAGCGGCCGGACTAGCGGGGATGAGCAGTTCTTC	peak15	M1_0_F1	0	854	CD8
TGTGCCAGCAGCGGCCGGGACAGGTTAAACTCACCCCTCCACTTT	peak15	M1_0_F1	0	855	CD8
TGTGCCAGCAGCGGCCTGAGAGGGCCCAATGAGCAGTTCTTC	peak21	M1_0_F1	0	856	CD8
TGTGCCAGCAGCGGCGAAAGGGCGCAAGTCGCAGAGACCCAGTACTTC	peak15	M1_0_F1	0	857	CD8
TGTGCCAGCAGCGGGACGGCAGCCTACGAGCAGTACTTC	peak15	M1_0_F1	0	858	CD8
TGTGCCAGCAGCGGGCTCTCCAAAAACATTCAGTACTTC	peak15	M1_0_F1	0	859	CD4
TGTGCCAGCAGCGGGGGATCGGGCAATGAGCAGTTCTTC	peak15	M1_0_F1	0	861	CD8
TGTGCCAGCAGCGGGGGCGTCTCCTACAATGAGCAGTTCTTC	peak15	M1_0_F1	0	862	CD8
TGTGCCAGCAGCGGGGGGGCCCCCTACAATGAGCAGTTCTTC	peak21	M1_0_F1	0	863	CD8
TGTGCCAGCAGCGGGGGGGCCCCTTACAATGAGCAGTTCTTC	peak15	M1_0_F1	0	864	CD8
TGTGCCAGCAGCGGGGGGGGACTTCCCAATGAGCAGTTCTTC	peak15	M1_0_F1	0	865	CD8
TGTGCCAGCAGCGGGGGGGTCTCCTACAATGAGCAGTTCTTC	peak21	M1_0_F1	0	866	CD8
TGTGCCAGCAGCGGGGGTGGGGTACCCTACAATGAGCAGTTCTTC	peak15	M1_0_F1	0	867	CD8
TGTGCCAGCAGCGGGTACCAAGAGACCCAGTACTTC	peak15	M1_0_F1	0	868	CD4
TGTGCCAGCAGCGGTATAAATTCACCCCTCCACTTT	peak15	M1_0_F1	0	869	CD4
TGTGCCAGCAGCGGTGGAATGGATACGCAGTATTTT	peak21	M1_0_F1	0	870	CD8
TGTGCCAGCAGCGGTTCCGGGACAGGGTCGAGGTATGAGCAGTTCTTC	peak21	M1_0_F1	0	871	CD8
TGTGCCAGCAGCGTAAGCGGGGGAGCTTACGAGCAGTACTTC	peak15	M1_0_F1	0	872	CD8
TGTGCCAGCAGCGTACAGGATACTGAAGCTTTCTTT	peak15	M1_0_F1	0	873	CD4
TGTGCCAGCAGCGTAGAAGGTTCACCCCTCCACTTT	peak15	M1_0_F1	0	874	CD4
TGTGCCAGCAGCGTAGACCAAAGCACTGAAGCTTTCTTT	peak15	M1_0_F1	0	875	CD8
TGTGCCAGCAGCGTAGACGGGAGCTCCTACAATGAGCAGTTCTTC	peak15	M1_0_F1	1.03e-06	876	CD8
TGTGCCAGCAGCGTAGAGGAAGGGAATGGCTACACCTTC	peak15	M1_0_F1	0	877	CD4
TGTGCCAGCAGCGTAGAGGGCAGGGCGGCAGAGACCCAGTACTTC	peak15	M1_0_F1	0	878	CD8
TGTGCCAGCAGCGTAGATAGCGGGGGGGCCTATGAGCAGTTCTTC	peak10	M1_0_F1	0	879	CD8
TGTGCCAGCAGCGTAGATGCTGGGGCCAACGTCCTGACTTTC	peak21	M1_0_F1	0	880	CD4
TGTGCCAGCAGCGTAGATGGTACGGGCCGTCCAGAGACCCAGTACTTC	peak15	M1_0_F1	0	881	CD8
TGTGCCAGCAGCGTAGCCGCAGGGGCGAGCTATGGCTACACCTTC	peak15	M1_0_F1	0	882	CD8
TGTGCCAGCAGCGTAGCGGGGGGGTCGGCCTATGGCTACACCTTC	peak15	M1_0_F1	0	883	CD8
TGTGCCAGCAGCGTAGCTACGGGGGGGCTGGAGACCCAGTACTTC	peak21	M1_0_F1	0	884	CD8
TGTGCCAGCAGCGTAGCTGGGGGCGCCTACGAGCAGTACTTC	peak15	M1_0_F1	0	885	CD8
TGTGCCAGCAGCGTAGCTGGGGTCCCGGCCAATGAGCAGTTCTTC	peak15	M1_0_F1	0	886	CD8
TGTGCCAGCAGCGTAGGAGGATCCCCCTACAATGAGCAGTTCTTC	peak15	M1_0_F1	0	887	CD8
TGTGCCAGCAGCGTAGGAGGGGGACCGACCTACGAGCAGTACTTC	peak15	M1_0_F1	0	888	CD8
TGTGCCAGCAGCGTAGGAGGGGGGACCTACGAGCAGTACTTC	peak15	M1_0_F1	0	889	CD8
TGTGCCAGCAGCGTAGGAGGGGTCTCCTACAATGAGCAGTTCTTC	peak15	M1_0_F1	0	890	CD8
TGTGCCAGCAGCGTAGGAGGGGTTTCCTACAATGAGCAGTTCTTC	peak21	M1_0_F1	0	891	CD8
TGTGCCAGCAGCGTAGGCCAGGGGGCCCCCTACAATGAGCAGTTCTTC	peak15	M1_0_F1	0	892	CD8
TGTGCCAGCAGCGTAGGCCTGGAGGCCTACGAGCAGTACTTC	peak15	M1_0_F1	0	893	CD8
TGTGCCAGCAGCGTAGGCGGAGGGGTGGACTCCTACAATGAGCAGTTCTTC	peak21	M1_0_F1	0	894	CD8
TGTGCCAGCAGCGTAGGCGGGACAAACTACAATGAGCAGTTCTTC	peak15	M1_0_F1	0	895	CD8
TGTGCCAGCAGCGTAGGCGGGGCTCCATACAATGAGCAGTTCTTC	peak10	M1_0_F1	0	896	CD8
TGTGCCAGCAGCGTAGGCGGGGTATCCTACAATGAGCAGTTCTTC	peak21	M1_0_F1	0	897	CD8
TGTGCCAGCAGCGTAGGCGGGGTCCCCTACAATGAGCAGTTCTTC	peak15	M1_0_F1	0	898	CD8
TGTGCCAGCAGCGTAGGCGGGGTCTCCTACAATGAGCAGTTCTTC	peak21	M1_0_F1	0	899	CD8
TGTGCCAGCAGCGTAGGGAAGGGGACAGGGGCGGATGAGCAGTTCTTC	peak15	M1_0_F1	0	900	CD8
TGTGCCAGCAGCGTAGGGCAGGGCTTAACCTACGAGCAGTACTTC	peak21	M1_0_F1	0	901	CD8
TGTGCCAGCAGCGTAGGGGAACAGCCGAACACCGGGGAGCTGTTTTTT	peak15	M1_0_F1	0	902	CD8
TGTGCCAGCAGCGTAGGGGACATCCAATATGAGCAGTTCTTC	peak15	M1_0_F1	0	903	CD8
TGTGCCAGCAGCGTAGGGGGAACCGTATACAATGAGCAGTTCTTC	peak15	M1_0_F1	0	904	CD8
TGTGCCAGCAGCGTAGGGGGAGTCTCCTACAATGAGCAGTTCTTC	peak21	M1_0_F1	0	905	CD8
TGTGCCAGCAGCGTAGGGGGGACAGGCTACAATGAGCAGTTCTTC	peak10	M1_0_F1	0	906	CD8
TGTGCCAGCAGCGTAGGGGGGGCGCCCTACAATGAGCAGTTCTTC	peak15	M1_0_F1	0	907	CD8
TGTGCCAGCAGCGTAGGGGGGGCTGTCTACAATGAGCAGTTCTTC	peak15	M1_0_F1	0	908	CD8
TGTGCCAGCAGCGTAGGGGGGGTCCCATACAATGAGCAGTTCTTC	peak15	M1_0_F1	0	909	CD8
TGTGCCAGCAGCGTAGGGGGGGTCCCCTACAATGAGCAGTTCTTC	peak15	M1_0_F1	0	910	CD8
TGTGCCAGCAGCGTAGGGGGGGTCTCCTACAATGAGCAGTTCTTC	peak21	M1_0_F1	0	911	CD8
TGTGCCAGCAGCGTAGGGGGGGTTGGCTACAATGAGCAGTTCTTC	peak10	M1_0_F1	0	912	CD8
TGTGCCAGCAGCGTAGGGTCCCCCTCCTACGAGCAGTACTTC	peak21	M1_0_F1	0	913	CD8
TGTGCCAGCAGCGTAGGTGCAGGGGCAGCGAACACTGAAGCTTTCTTT	peak21	M1_0_F1	0	914	CD8
TGTGCCAGCAGCGTAGGTGGGGTCTCCTACAATGAGCAGTTCTTC	peak15	M1_0_F1	0	915	CD8
TGTGCCAGCAGCGTAGTCGGGACAGGGCTATTAGGTGAGCAGTTCTTC	peak15	M1_0_F1	0	916	CD8
TGTGCCAGCAGCGTAGTTGCAGGGGATGGGGGTACGCAGTATTTT	peak10	M1_0_F1	0	917	CD8
TGTGCCAGCAGCGTAGTTGGGGAGTCCTACGAGCAGTACTTC	peak15	M1_0_F1	0	918	CD8
TGTGCCAGCAGCGTATCACAGGGAGGCACTGAAGCTTTCTTT	peak10	M1_0_F1	0	919	CD8
TGTGCCAGCAGCGTATGAGGGGGCAGATCGAGGACGCAAAAACATTCAGTACTTC	peak21	M1_0_F1	0	920	CD8
TGTGCCAGCAGCGTCCGGGACAGGATTAATTCACCCCTCCACTTT	peak21	M1_0_F1	0	921	CD8
TGTGCCAGCAGCGTCGAAGGGGGTCCTCTTAGCAATCAGCCCCAGCATTTT	peak15	M1_0_F1	0	922	CD8
TGTGCCAGCAGCGTCGGACTAGCGGGGGGGCCGGTGGGTGAGCAGTTCTTC	peak15	M1_0_F1	0	923	CD8
TGTGCCAGCAGCGTCGGAGGGGTGGGATACAATGAGCAGTTCTTC	peak15	M1_0_F1	0	924	CD8
TGTGCCAGCAGCGTCGGCGGGACCCCAACCTACGAGCAGTACTTC	peak10	M1_0_F1	0	925	CD8
TGTGCCAGCAGCGTCGGGGGACAGGGCTACAATGAGCAGTTCTTC	peak15	M1_0_F1	0	926	CD8
TGTGCCAGCAGCGTCTATTCTCGGGCTGAAGCTTTCTTT	peak10	M1_0_F1	0	927	CD4
TGTGCCAGCAGCGTGGGAGGGGCCCCATACAATGAGCAGTTCTTC	peak15	M1_0_F1	0	928	CD8
TGTGCCAGCAGCGTGGGCGGGGCCCCCTACAATGAGCAGTTCTTC	peak21	M1_0_F1	0	929	CD8
TGTGCCAGCAGCGTGGGGACAGGGGGACCAGATACGCAGTATTTT	peak15	M1_0_F1	0	930	CD4
TGTGCCAGCAGCGTGGGGGGGGCCCCCTACAATGAGCAGTTCTTC	peak15	M1_0_F1	0	931	CD8
TGTGCCAGCAGCGTGGGGGGGGCCTTCTACAATGAGCAGTTCTTC	peak21	M1_0_F1	0	932	CD8
TGTGCCAGCAGCGTTCAGGGGAACTCTGGGGCCAACGTCCTGACTTTC	peak10	M1_0_F1	0	933	CD4
TGTGCCAGCAGCGTTGGAGGTCGTGAAGCTTTCTTT	peak21	M1_0_F1	0	934	CD8
TGTGCCAGCAGCGTTGGGGGAGACGCCTACGAGCAGTACTTC	peak15	M1_0_F1	0	935	CD8
TGTGCCAGCAGCGTTGGGGGAGTCCCCTACAATGAGCAGTTCTTC	peak10	M1_0_F1	0	936	CD8
TGTGCCAGCAGCGTTGGGGGGACAGGGTACAATGAGCAGTTCTTC	peak21	M1_0_F1	0	937	CD8
TGTGCCAGCAGCTACACTCCAATAAGCGGGGGGGCCAATGAGCAGTTCTTC	peak15	M1_0_F1	0	938	CD8
TGTGCCAGCAGCTACCCCAACGGGGGTGCCCGAAACACCATATATTTT	peak10	M1_0_F1	0	939	CD4
TGTGCCAGCAGCTACCCTCGACAGGGTGAGCAGTTCTTC	peak15	M1_0_F1	0	940	CD4
TGTGCCAGCAGCTACGCAAATTCACCCCTCCACTTT	peak15	M1_0_F1	0	941	CD4
TGTGCCAGCAGCTACGTTGGTAGAGAAGCTTTCTTT	peak15	M1_0_F1	0	942	CD8
TGTGCCAGCAGCTATGGTTCGGGGAACACTGAAGCTTTCTTT	peak10	M1_0_F1	0	943	CD8
TGTGCCAGCAGCTCACCACAGGGGGCTCAGCCCCAGCATTTT	peak15	M1_0_F1	0	944	CD4
TGTGCCAGCAGCTCACGGGACAGACTGAACACTGAAGCTTTCTTT	peak15	M1_0_F1	0	945	CD8
TGTGCCAGCAGCTCAGACTCATACACAGATACGCAGTATTTT	peak21	M1_0_F1	0	946	CD4
TGTGCCAGCAGCTCAGGCCGCGGGTCAATCCACGAGCAGTACTTC	peak15	M1_0_F1	0	947	CD4
TGTGCCAGCAGCTCCACCATACACAATCAGCCCCAGCATTTT	peak15	M1_0_F1	0	948	CD8
TGTGCCAGCAGCTCCACTGTTGGGGAAAAACTGTTTTTT	peak10	M1_0_F1	0	949	CD8
TGTGCCAGCAGCTCCCAAGGGGGCGTTGAAAAACTGTTTTTT	peak21	M1_0_F1	0	950	CD4
TGTGCCAGCAGCTCCCAGGGGAGTGTAGTAGCTGAAGCTTTCTTT	peak10	M1_0_F1	1.03e-06	951	CD4
TGTGCCAGCAGCTCCCCCCCTGGCCAGGGGGACTATGGCTACACCTTC	peak21	M1_0_F1	0	952	CD8
TGTGCCAGCAGCTCCCCCCGGGAGGGGCACAATGAGCAGTTCTTC	peak21	M1_0_F1	0	953	CD8
TGTGCCAGCAGCTCCCCGATGGGTAGCGGGGAGGACAATGAGCAGTTCTTC	peak21	M1_0_F1	0	954	CD8
TGTGCCAGCAGCTCCCGGGACAGGTTAAATTCACCCCTCCACTTT	peak15	M1_0_F1	0	955	CD8
TGTGCCAGCAGCTCCCTACTAGCGGGGGTAACTAGCACAGATACGCAGTATTTT	peak15	M1_0_F1	0	956	CD8
TGTGCCAGCAGCTCCGACAGGGGAGAGACCCAGTACTTC	peak15	M1_0_F1	3.08e-06	957	CD8
TGTGCCAGCAGCTCCGACGCTAATTCACCCCTCCACTTT	peak10	M1_0_F1	0	958	CD4
TGTGCCAGCAGCTCCGCAGGGGAAACCGGGGAGCTGTTTTTT	peak15	M1_0_F1	0	959	CD8
TGTGCCAGCAGCTCCGCCCTAGATGTCCCCTCCTGC	peak15	M1_0_F1	0	960	CD8
TGTGCCAGCAGCTCCGGAGGCGTCTACGAGCAGTACTTC	peak15	M1_0_F1	0	961	CD8
TGTGCCAGCAGCTCCGGGACAGGAGCCTACGAGCAGTACTTC	peak15	M1_0_F1	0	962	CD8
TGTGCCAGCAGCTCCGGGACAGGGATCTACGAGCAGTACTTC	peak15	M1_0_F1	0	963	CD8
TGTGCCAGCAGCTCCGGGACTAGCGCCTACAATGAGCAGTTCTTC	peak10	M1_0_F1	0	964	CD8
TGTGCCAGCAGCTCCTACGGAAGAGGAGCTTTCTTT	peak15	M1_0_F1	0	965	CD8
TGTGCCAGCAGCTCCTATACCCGGGGGCTGTTTTTT	peak10	M1_0_F1	0	966	CD4
TGTGCCAGCAGCTCCTGGACTAGCGGGGGGACAGATACGCAGTATTTT	peak15	M1_0_F1	1.03e-06	967	CD4
TGTGCCAGCAGCTCGACTCATACTCCAGTAGCTTTCTTT	peak15	M1_0_F1	0	968	CD8
TGTGCCAGCAGCTCGAGGGACACCTATGGCTACACCTTC	peak15	M1_0_F1	0	969	CD8
TGTGCCAGCAGCTCGGACAGGGGTGGAACAGATACGCAGTATTTT	peak15	M1_0_F1	0	970	CD8
TGTGCCAGCAGCTCGGATGGGGGCTATGGCTACACCTTC	peak15	M1_0_F1	0	971	CD8
TGTGCCAGCAGCTCGGCGGGACAGACGTATCAGCCCCAGCATTTT	peak10	M1_0_F1	0	972	CD4
TGTGCCAGCAGCTCGGCGGGCTACGAGCAGTACTTC	peak15	M1_0_F1	0	973	CD8
TGTGCCAGCAGCTCGGGACAGAATAATAAGAGACCCAGTACTTC	peak15	M1_0_F1	0	974	CD8
TGTGCCAGCAGCTCGGGACAGGAGCCACTGACTCGCTACGAGCAGTACTTC	peak15	M1_0_F1	0	975	CD8
TGTGCCAGCAGCTCGGGACAGGTCCTCTCTGGGGCCAACGTCCTGACTTTC	peak21	M1_0_F1	0	976	CD8
TGTGCCAGCAGCTCGGGACAGGTCTACAATGAGCAGTTCTTC	peak15	M1_0_F1	0	977	CD4
TGTGCCAGCAGCTCGGGACAGGTTAATGGCTACACCTTC	peak15	M1_0_F1	0	978	CD8
TGTGCCAGCAGCTCGGGACCGAGCTCCTATAATTCACCCCTCCACTTT	peak15	M1_0_F1	0	979	CD4
TGTGCCAGCAGCTCGGGACTAGCGGGGGTCCTTAGCTCCTACAATGAGCAGTTCTTC	peak15	M1_0_F1	0	980	CD8
TGTGCCAGCAGCTCGGGGACTAACACCGGGGAGCTGTTTTTT	peak15	M1_0_F1	0	981	CD8
TGTGCCAGCAGCTCTCCAACGGGGGGCCACAATGAGCAGTTCTTC	peak15	M1_0_F1	0	982	CD8
TGTGCCAGCAGCTCTCGGATAGAAGGCACTGAAGCTTTCTTT	peak21	M1_0_F1	0	983	CD8
TGTGCCAGCAGCTCTTCCTTGACAGGCTCGGATGGTGGCTACACCTTC	peak15	M1_0_F1	0	984	CD4
TGTGCCAGCAGCTGGACAGCTGAGCAGTTCTTC	peak15	M1_0_F1	0	985	CD8
TGTGCCAGCAGCTGGACGAACACTGAAGCTTTCTTT	peak15	M1_0_F1	0	986	CD8
TGTGCCAGCAGCTGGAGGGACAGGAACACCGGGGAGCTGTTTTTT	peak10	M1_0_F1	0	987	CD4
TGTGCCAGCAGCTGGCCCGGAGGGGGCAATGAGCAGTTCTTC	peak15	M1_0_F1	0	988	CD8
TGTGCCAGCAGCTGGCCTGGGACTAGCGGCTCTGGGGCCAACGTCCTGACTTTC	peak15	M1_0_F1	0	989	CD8
TGTGCCAGCAGCTGGCGACAGGGTTGGGACGAGCAGTACTTC	peak15	M1_0_F1	0	990	CD4
TGTGCCAGCAGCTGGGACAGATTGAACACCGGGGAGCTGTTTTTT	peak15	M1_0_F1	0	991	CD4
TGTGCCAGCAGCTGGGCCTACGAGCAGTACTTC	peak15	M1_0_F1	0	992	CD8
TGTGCCAGCAGCTGGGCTGGACGGGGCTACTTC	peak10	M1_0_F1	0	993	CD8
TGTGCCAGCAGCTGGGGGCCCTCCTACGAGCAGTACTTC	peak15	M1_0_F1	0	994	CD8
TGTGCCAGCAGCTGGGGGGGAAACTACAATGAGCAGTTCTTC	peak15	M1_0_F1	0	995	CD8
TGTGCCAGCAGCTGGGGGGGAAGCACAGATACGCAGTATTTT	peak10	M1_0_F1	0	996	CD4
TGTGCCAGCAGCTGGGGGTCTAGCACAGATACGCAGTATTTT	peak10	M1_0_F1	0	997	CD4
TGTGCCAGCAGCTGGTTAGCGGGGGGAGGGGGAGAGACCCAGTACTTC	peak15	M1_0_F1	0	998	CD8
TGTGCCAGCAGCTTAAAAGGCCGGAGACTAGCGGGCGAAAGCTCCTACGAGCAGTACTTC	peak15	M1_0_F1	0	999	CD8
TGTGCCAGCAGCTTAAATCGGGGGACTAGCCATCCGGGGAATGAGCAGTTCTTC	peak15	M1_0_F1	0	1000	CD8
TGTGCCAGCAGCTTAACAAGAGGAGGAGGAGGCACCGGGGAGCTGTTTTTT	peak21	M1_0_F1	0	1001	CD8
TGTGCCAGCAGCTTAACGGGCTCCTACGAGCAGTACGTC	peak15	M1_0_F1	0	1002	CD8
TGTGCCAGCAGCTTAACTCATGGACAGGGGGAAAACATTCAGTACTTC	peak10	M1_0_F1	0	1003	CD4
TGTGCCAGCAGCTTAACTGGGCAGGGTAAGTTCTTC	peak15	M1_0_F1	0	1004	CD8
TGTGCCAGCAGCTTAAGACAGAGCACTGAAGCTTTCTTT	peak10	M1_0_F1	0	1005	CD8
TGTGCCAGCAGCTTAAGGTCTAGCGGGGGCGTTCCTTTT	peak15	M1_0_F1	0	1006	CD4
TGTGCCAGCAGCTTAATGACAGGGGATTCACCCCTCCACTTT	peak15	M1_0_F1	0	1007	CD4
TGTGCCAGCAGCTTAATGAGGGCAACAACTAATGAAAAACTGTTTTTT	peak15	M1_0_F1	0	1008	CD4
TGTGCCAGCAGCTTAATGATGGCGGAAGAGACCCAGTACTTC	peak15	M1_0_F1	0	1009	CD4
TGTGCCAGCAGCTTAATGCCCGACACGGAAGCTTTCTTT	peak15	M1_0_F1	0	1010	CD8
TGTGCCAGCAGCTTAATGGCTTCCCTGTCGCAAGAGACCCAGTACTTC	peak15	M1_0_F1	0	1011	CD4
TGTGCCAGCAGCTTAATGGGCACCACAGATACGCAGTATTTT	peak15	M1_0_F1	0	1012	CD4
TGTGCCAGCAGCTTACACGGGGCCGTTCAAGAGACCCAGTACTTC	peak15	M1_0_F1	0	1014	CD8
TGTGCCAGCAGCTTACAGGGGACCTACAATGAGCAGTTCTTC	peak21	M1_0_F1	0	1015	CD8
TGTGCCAGCAGCTTACAGGGGGCAGTTTACGAGCAGTACTTC	peak15	M1_0_F1	0	1016	CD8
TGTGCCAGCAGCTTACAGGTCGCCGGCACAGATACGCAGTATTTT	peak15	M1_0_F1	0	1017	CD8
TGTGCCAGCAGCTTACCGACGGAGAACACTGAAGCTTTCTTT	peak21	M1_0_F1	0	1018	CD4
TGTGCCAGCAGCTTACTAGGGTCCGGGGAGCTGTTTTTT	peak15	M1_0_F1	0	1019	CD8
TGTGCCAGCAGCTTACTCGGGGGGGCGGCAGATACGCAGTATTTT	peak5	M1_0_F1	0	1020	CD4
TGTGCCAGCAGCTTACTGGACAGTTACAATGAGCAGTTCTTC	peak21	M1_0_F1	0	1021	CD4
TGTGCCAGCAGCTTAGAACAGATAATGAACACTGAAGCTTTCTTT	peak21	M1_0_F1	0	1022	CD8
TGTGCCAGCAGCTTAGAAGCCGGGAACACTGAAGCTTTCTTT	peak15	M1_0_F1	0	1023	CD8
TGTGCCAGCAGCTTAGACACCCACACTGAAGCTTTCTTT	peak15	M1_0_F1	0	1024	CD4
TGTGCCAGCAGCTTAGACGGGAGGACCGGGGAGCTGTTTTTT	peak10	M1_0_F1	2.05e-06	1025	CD4
TGTGCCAGCAGCTTAGACGGGGGAGGTTCACCCCTCCACTTT	peak15	M1_0_F1	0	1026	CD4
TGTGCCAGCAGCTTAGAGCGGGGGCCATACTACGAGCAGTACTTC	peak21	M1_0_F1	0	1027	CD8
TGTGCCAGCAGCTTAGAGGGACAGGGGTTCTTATCACCCCTCCACTTT	peak15	M1_0_F1	0	1028	CD8
TGTGCCAGCAGCTTAGAGGGGGCCGTTTTTGCTGAAGCTTTCTTT	peak21	M1_0_F1	0	1029	CD8
TGTGCCAGCAGCTTAGATGCGGATTCACCCCTCCACTTT	peak21	M1_0_F1	0	1030	CD4
TGTGCCAGCAGCTTAGATTCTTCAGGGATGGGCAATCAGCCCCAGCATTTT	peak15	M1_0_F1	0	1031	CD8
TGTGCCAGCAGCTTAGCAACGGGACCAGATACGCAGTATTTT	peak10	M1_0_F1	0	1032	CD4
TGTGCCAGCAGCTTAGCAGCTTCCTCCTACAATGAGCAGTTCTTC	peak15	M1_0_F1	0	1033	CD8
TGTGCCAGCAGCTTAGCAGGGGGGGGCGGGGGCTTCAATCAGCCCCAGCATTTT	peak15	M1_0_F1	0	1034	CD8
TGTGCCAGCAGCTTAGCCCAGGCCTACGAGCAGTACGTC	peak21	M1_0_F1	0	1035	CD8
TGTGCCAGCAGCTTAGCCCCCCTCCTGCAGGGTTTCGATGAGCAGTTCTTC	peak10	M1_0_F1	0	1036	CD4
TGTGCCAGCAGCTTAGCGCAAGGTAGCTACGAGCAGTACTTC	peak21	M1_0_F1	0	1037	CD8
TGTGCCAGCAGCTTAGCGCAGGGGTACTGGCAGCCCCAGCATTTT	peak15	M1_0_F1	0	1038	CD4
TGTGCCAGCAGCTTAGCGCCTGAGGGGGGAAAACTGTTTTTT	peak21	M1_0_F1	0	1039	CD8
TGTGCCAGCAGCTTAGCGCGGAGCACAGATACGCAGTATTTT	peak15	M1_0_F1	0	1040	CD4
TGTGCCAGCAGCTTAGCGGGAGCCTACGAGCAGTACTTC	peak21	M1_0_F1	0	1041	CD8
TGTGCCAGCAGCTTAGCTGAAAACTATGGCTACACCTTC	peak10	M1_0_F1	0	1042	CD8
TGTGCCAGCAGCTTAGGACAGGGGGCGTCCATCGAGCAGTACTTC	peak15	M1_0_F1	0	1043	CD8
TGTGCCAGCAGCTTAGGACAGGTTTACGAGCAGTACTTC	peak15	M1_0_F1	1.03e-06	1044	CD8
TGTGCCAGCAGCTTAGGACTAGGGGGCTACGAGCAGTACTTC	peak21	M1_0_F1	0	1045	CD8
TGTGCCAGCAGCTTAGGAGAGAGTAAAGGCTCCTATAATTCACCCCTCCACTTT	peak10	M1_0_F1	0	1046	CD4
TGTGCCAGCAGCTTAGGAGCAGTCACTGAAGCTTTCTTT	peak15	M1_0_F1	0	1047	CD4
TGTGCCAGCAGCTTAGGAGGGGCTCCCTACAATGAGCAGTTCTTC	peak15	M1_0_F1	0	1048	CD8
TGTGCCAGCAGCTTAGGCCTCAGGGTCGGGGAGCTGTTTTTT	peak15	M1_0_F1	0	1049	CD8
TGTGCCAGCAGCTTAGGCGGGCACCCGGGCTACACCTTC	peak21	M1_0_F1	0	1050	CD4
TGTGCCAGCAGCTTAGGCGGGGCCCCATACAATGAGCAGTTCTTC	peak15	M1_0_F1	0	1051	CD8
TGTGCCAGCAGCTTAGGGACCAATCAGCCCCAGCATTTT	peak15	M1_0_F1	0	1052	CD8
TGTGCCAGCAGCTTAGGGCAGACCCGAGGCTCCTATAATTCACCCCTCCACTTT	peak10	M1_0_F1	0	1053	CD4
TGTGCCAGCAGCTTAGGGCAGGGGAAGGGCTCCTATAATTCACCCCTCCACTTT	peak10	M1_0_F1	0	1054	CD4
TGTGCCAGCAGCTTAGGGCGGGCCTACGAGCAGTACGTC	peak21	M1_0_F1	0	1055	CD8
TGTGCCAGCAGCTTAGGGGAGGGGGCCTCGTACAATGAGCAGTTCTTC	peak21	M1_0_F1	0	1056	CD8
TGTGCCAGCAGCTTAGGGGGGGCCTGGTACAATGAGCAGTTCTTC	peak15	M1_0_F1	0	1057	CD8
TGTGCCAGCAGCTTAGGTCAAGGGCAGCCCCAGCATTTT	peak5	M1_0_F1	0	1058	CD4
TGTGCCAGCAGCTTAGGTGGGGTCACTGAAGCTTTCTTT	peak15	M1_0_F1	0	1059	CD8
TGTGCCAGCAGCTTAGGTGGGTTCTACGAGCAGTACTTC	peak10	M1_0_F1	0	1060	CD8
TGTGCCAGCAGCTTAGGTGTCGGGGGGCCCACAGATACGCAGTATTTT	peak15	M1_0_F1	0	1061	CD8
TGTGCCAGCAGCTTAGTAATAGCGGGGGGGCAATTGCAGTTCTTC	peak15	M1_0_F1	0	1062	CD8
TGTGCCAGCAGCTTAGTACTAGCGAACGCCAATGAGCAGTTCTTC	peak15	M1_0_F1	0	1063	CD4
TGTGCCAGCAGCTTAGTAGGCGGTTCCTACGAGCAGTACTTC	peak21	M1_0_F1	0	1064	CD8
TGTGCCAGCAGCTTAGTGTCTAGCGGGGGGTTCTACAATGAGCAGTTCTTC	peak10	M1_0_F1	0	1065	CD4
TGTGCCAGCAGCTTAGTTGACGCTGGAAACATTCAGTACTTC	peak15	M1_0_F1	0	1066	CD4
TGTGCCAGCAGCTTAGTTGGGACAGGGAGCGTCCGCGGCACTGAAGCTTTCTTT	peak15	M1_0_F1	0	1067	CD4
TGTGCCAGCAGCTTATACACAGGGGATAACGAGCAGTACTTC	peak21	M1_0_F1	0	1068	CD8
TGTGCCAGCAGCTTATATAATCAGCCCCAGCATTTT	peak15	M1_0_F1	0	1069	CD4
TGTGCCAGCAGCTTATCATCGTCCGCCGGGACCCAGTACTTC	peak5	M1_0_F1	0	1070	CD4
TGTGCCAGCAGCTTATCCCTCGGGGGGCAATATAATGGCTACACCTTC	peak21	M1_0_F1	0	1071	CD8
TGTGCCAGCAGCTTATCGACACCATATGAAGCTTTCTTT	peak21	M1_0_F1	0	1072	CD8
TGTGCCAGCAGCTTATCGCAAGGGGACTATGGCTACACCTTC	peak21	M1_0_F1	0	1073	CD8
TGTGCCAGCAGCTTATCGGCGGCGATGGCCTACGAGCAGTACTTC	peak15	M1_0_F1	0	1074	CD4
TGTGCCAGCAGCTTATCGGTAGAGCAGCCCTTACCCTACGAGCAGTACTTC	peak10	M1_0_F1	0	1075	CD8
TGTGCCAGCAGCTTATCTAGGGCCACTCAAGAGACCCAGTACTTC	peak15	M1_0_F1	0	1076	CD4
TGTGCCAGCAGCTTATGGGCGCGGGCTAACAATGAGCAGTTCTTC	peak5	M1_0_F1	0	1077	CD4
TGTGCCAGCAGCTTATGGGGGGATTCACCCCTCCACTTT	peak21	M1_0_F1	0	1078	CD8
TGTGCCAGCAGCTTCACAGGAGGCAATCAGCCCCAGCATTTT	peak10	M1_0_F1	0	1079	CD4
TGTGCCAGCAGCTTCACGGGGAGTGGAGATACGCAGTATTTT	peak15	M1_0_F1	0	1080	CD4
TGTGCCAGCAGCTTCAGGGCGGGTGAGCAGTTCTTC	peak10	M1_0_F1	0	1081	CD4
TGTGCCAGCAGCTTCCCAGGGTCCTACGAGCAGTACTTC	peak15	M1_0_F1	0	1082	CD8
TGTGCCAGCAGCTTCCCCACAGGGGATGAGCAGTTCTTC	peak15	M1_0_F1	0	1083	CD4
TGTGCCAGCAGCTTCCCGAACAATGAGCAGTTCTTC	peak21	M1_0_F1	0	1084	CD8
TGTGCCAGCAGCTTCCCGGGACAGGGGAGGAGAGACCCAGTACTTC	peak21	M1_0_F1	0	1085	CD8
TGTGCCAGCAGCTTCCGCAGGCCGACTCATGCCCCCCAATGAGCAGTTCTTC	peak15	M1_0_F1	0	1086	CD8
TGTGCCAGCAGCTTCCGGGAACAGATCCAAGAGACCCAGTACTTC	peak15	M1_0_F1	0	1087	CD4
TGTGCCAGCAGCTTCCGGGACGGCAGTCGGACCCAGTACTTC	peak15	M1_0_F1	0	1088	CD4
TGTGCCAGCAGCTTCCTTACTCCGGGACAGGTTCACTCTGGAAACACCATATATTTT	peak21	M1_0_F1	0	1089	CD8
TGTGCCAGCAGCTTCGGACACGGCTCTGGAAACACCATATATTTT	peak15	M1_0_F1	0	1090	CD8
TGTGCCAGCAGCTTCGGACTAGCGGGGGTTTTTAGCACAGATACGCAGTATTTT	peak15	M1_0_F1	0	1091	CD8
TGTGCCAGCAGCTTCGGGATCCCCTACGAGCAGTACTTC	peak15	M1_0_F1	0	1092	CD8
TGTGCCAGCAGCTTCGGGGATTCACCCCTCCACTTT	peak10	M1_0_F1	0	1093	CD4
TGTGCCAGCAGCTTCGGGTCCCTGAACACTGAAGCTTTCTTT	peak15	M1_0_F1	0	1094	CD4
TGTGCCAGCAGCTTCGTGGCGGGGGGCCAAGAGACCCAGTACTTC	peak10	M1_0_F1	4.1e-06	1095	CD4
TGTGCCAGCAGCTTCTCAGGAAACTATGGCTACACCTTC	peak15	M1_0_F1	0	1096	CD8
TGTGCCAGCAGCTTGAACAGCGGGGGGGCCGAGACCCAGTACTTC	peak15	M1_0_F1	9.23e-06	1097	CD4
TGTGCCAGCAGCTTGACAGGGCAGGGCACTGAAGCTTTCTTT	peak21	M1_0_F1	0	1098	CD8
TGTGCCAGCAGCTTGACTGGGGTCTACGAGCAGTACTTC	peak15	M1_0_F1	0	1099	CD4
TGTGCCAGCAGCTTGCAGGTAGATACGCAGTATTTT	peak21	M1_0_F1	0	1100	CD8
TGTGCCAGCAGCTTGCCCAGGGATGGCACTGAAGCTTTCTTT	peak5	M1_0_F1	0	1101	CD4
TGTGCCAGCAGCTTGCCGACTGAGAACACTGAAGCTTTCTTT	peak15	M1_0_F1	0	1102	CD4
TGTGCCAGCAGCTTGCCGAGAGGGGAGGCCTATGGCTACACCTTC	peak15	M1_0_F1	0	1103	CD4
TGTGCCAGCAGCTTGCCGGGACGGAGTACGGGTAATGAGCAGTTCTTC	peak10	M1_0_F1	0	1104	CD8
TGTGCCAGCAGCTTGGAACGAGGAAACACTGAAGCTTTCTTT	peak15	M1_0_F1	0	1105	CD8
TGTGCCAGCAGCTTGGACGTAACCTACGAGCAGTACTTC	peak15	M1_0_F1	0	1106	CD4
TGTGCCAGCAGCTTGGAGACAGATACGCAGTATTTT	peak15	M1_0_F1	0	1107	CD8
TGTGCCAGCAGCTTGGAGACGAGCTCCTATAATTCACCCCTCCACTTT	peak15	M1_0_F1	0	1108	CD4
TGTGCCAGCAGCTTGGAGGTTCTAGCGGGGGTGTACGAGCAGTACTTC	peak21	M1_0_F1	0	1109	CD8
TGTGCCAGCAGCTTGGCACGGAACTATGGCTACACCTTC	peak15	M1_0_F1	0	1110	CD4
TGTGCCAGCAGCTTGGCCATAGGGAGCTCCTACAATGAGCAGTTCTTC	peak5	M1_0_F1	0	1111	CD4
TGTGCCAGCAGCTTGGCCCGGAACACTGAAGCTTTCTTT	peak15	M1_0_F1	0	1112	CD4
TGTGCCAGCAGCTTGGGAGAGGTAGCCAAAAACATTCAGTACTTC	peak15	M1_0_F1	0	1113	CD4
TGTGCCAGCAGCTTGGGCAGCCACTATGGCTACACCTTC	peak15	M1_0_F1	0	1114	CD8
TGTGCCAGCAGCTTGGGGGCGGGTGCTGAGCAGTTCTTC	peak15	M1_0_F1	0	1115	CD8
TGTGCCAGCAGCTTGGGGGGAGCTCCCTACAATGAGCAGTTCTTC	peak15	M1_0_F1	0	1116	CD8
TGTGCCAGCAGCTTGGGGTGGTTACTGCAGTTCTTC	peak15	M1_0_F1	0	1117	CD8
TGTGCCAGCAGCTTGGGGTTAGGGGGCTACGAGCAGTACTTC	peak15	M1_0_F1	0	1118	CD8
TGTGCCAGCAGCTTGGGGTTGTCGGGCACAGGGGACCAAGAGACCCAGTACTTC	peak21	M1_0_F1	0	1119	CD4
TGTGCCAGCAGCTTGGGTATCGGGCCCCTCCACTTT	peak21	M1_0_F1	0	1120	CD8
TGTGCCAGCAGCTTGGTCCGGGGCGACGCTTATGGCTACACCTTC	peak15	M1_0_F1	0	1121	CD4
TGTGCCAGCAGCTTGGTGGGGACAGGACGTACCTACGAGCAGTACTTC	peak15	M1_0_F1	0	1122	CD8
TGTGCCAGCAGCTTGGTTGGGGCCGGGGAGACCCAGTACTTC	peak15	M1_0_F1	0	1123	CD4
TGTGCCAGCAGCTTGTATAGAACAGGGGAGGATCAGCCCCAGCATTTT	peak21	M1_0_F1	0	1124	CD4
TGTGCCAGCAGCTTGTCGGGACTAAATGAGCAGTTCTTC	peak15	M1_0_F1	0	1125	CD8
TGTGCCAGCAGCTTGTCTGGGATAGGTGAGCAGTACTTC	peak21	M1_0_F1	0	1126	CD8
TGTGCCAGCAGCTTTAACCTTATTCGAAACACCATATATTTT	peak15	M1_0_F1	0	1127	CD8
TGTGCCAGCAGCTTTACAGGGAATGAGCAGTTCTTC	peak15	M1_0_F1	0	1128	CD8
TGTGCCAGCAGCTTTAGCGGGGCGGGGGAGACCCAGTACTTC	peak15	M1_0_F1	0	1129	CD4
TGTGCCAGCAGCTTTAGCGGGGGGGAGTACAATGAGCAGTTCTTC	peak15	M1_0_F1	0	1130	CD8
TGTGCCAGCAGCTTTATGGGAAGTCGAGAAAAACTGTTTTTT	peak10	M1_0_F1	0	1131	CD4
TGTGCCAGCAGCTTTCACGCGACTACTTACAATGAGCAGTTCTTC	peak15	M1_0_F1	0	1132	CD4
TGTGCCAGCAGCTTTGAACTAGCCTACGAGCAGTACTTC	peak21	M1_0_F1	0	1133	CD8
TGTGCCAGCAGCTTTGACCCTGCGTTTGATGCGGGGGGGCCCGACAGATACGCAGTATTTT	peak15	M1_0_F1	0	1134	CD8
TGTGCCAGCAGCTTTGGACAGGGTATCCAAGAGACCCAGTACTTC	peak15	M1_0_F1	0	1135	CD4
TGTGCCAGCAGCTTTTCAGGGGGGAGAGAGACCCAGTACTTC	peak10	M1_0_F1	0	1136	CD4
TGTGCCAGCAGCTTTTCTCTCACTGAAGCTTTCTTT	peak15	M1_0_F1	0	1137	CD4
TGTGCCAGCAGGACCCTAGGGAATGAGCAGTTCTTC	peak21	M1_0_F1	0	1138	CD8
TGTGCCAGCAGGACGATAGCGGTCGCCTACGAGCAGTACTTC	peak10	M1_0_F1	0	1139	CD8
TGTGCCAGCAGGACTAGCGGGGGAGAGACCCAGTACTTC	peak15	M1_0_F1	0	1140	CD4
TGTGCCAGCAGGAGGGGGTATAGCAATCAGCCCCAGCATTTT	peak21	M1_0_F1	0	1141	CD8
TGTGCCAGCAGGATACTAGCGGGGGTTCTCTACGAGCAGTACTTC	peak15	M1_0_F1	0	1142	CD8
TGTGCCAGCAGGATAGCAGCAGATACGCAGTATTTT	peak15	M1_0_F1	0	1143	CD8
TGTGCCAGCAGGATCGGGACTAGCGGGGGGTACGAGCAGTACTTC	peak15	M1_0_F1	0	1144	CD8
TGTGCCAGCAGGATGGGGACTAGCGGGTTTTCGAACACCGGGGAGCTGTTTTTT	peak15	M1_0_F1	0	1145	CD4
TGTGCCAGCAGGCAAAGCGCGGATACGCAGTATTTT	peak15	M1_0_F1	0	1146	CD4
TGTGCCAGCAGGCAGGGGGTCGTCGCTGAAGCTTTCTTT	peak21	M1_0_F1	0	1147	CD8
TGTGCCAGCAGGCGGGACACTGATACGCAGTATTTT	peak15	M1_0_F1	0	1148	CD4
TGTGCCAGCAGGCGGGCAGTCTTCTACGAGCAGTACTTC	peak21	M1_0_F1	0	1149	CD8
TGTGCCAGCAGGCGGGGGGTGGCTACAGATACGCAGTATTTT	peak21	M1_0_F1	0	1150	CD8
TGTGCCAGCAGGCTGGGGGAATTGGGTCTTATCATCACAGATACGCAGTATTTT	peak21	M1_0_F1	0	1151	CD8
TGTGCCAGCAGGCTTACTAGCGGGGGAGTCGGGGAGCTGTTTTTT	peak15	M1_0_F1	0	1152	CD8
TGTGCCAGCAGGGACGGACTAGCGGGGAACCAAGAGACCCAGTACTTC	peak10	M1_0_F1	1.03e-06	1153	CD4
TGTGCCAGCAGGGCAACGACAGGGCTCGGAAACATTCAGTACTTC	peak5	M1_0_F1	0	1154	CD4
TGTGCCAGCAGGGCGCGGACGATGACCAATGAGCAGTTCTTC	peak15	M1_0_F1	0	1155	CD4
TGTGCCAGCAGGGCGGGGGTAGCCTACGAGCAGTACTTC	peak21	M1_0_F1	0	1156	CD8
TGTGCCAGCAGGGGACAGGGGAACACTGAAGCTTTCTTT	peak10	M1_0_F1	0	1157	CD8
TGTGCCAGCAGGGGCCCCGAGTGGGAGACCCAGTACTTC	peak15	M1_0_F1	0	1158	CD4
TGTGCCAGCAGGGGGGGACAGGGCTACGAGCAGTACTTC	peak15	M1_0_F1	0	1159	CD8
TGTGCCAGCAGGGGGGGGGGGTTGGATGAGCAGTTCTTC	peak15	M1_0_F1	0	1160	CD8
TGTGCCAGCAGGGGGTCTGGCTATGGCTACACCTTC	peak15	M1_0_F1	0	1162	CD4
TGTGCCAGCAGGGTTAGCGGGTCCCACGAGCAGTACGTC	peak21	M1_0_F1	0	1163	CD8
TGTGCCAGCAGGTCCGGGACAGTTAACACCGGGGAGCTGTTTTTT	peak15	M1_0_F1	0	1164	CD4
TGTGCCAGCAGGTGGACAGTTAATGAAAAACTGTTTTTT	peak15	M1_0_F1	0	1165	CD4
TGTGCCAGCAGGTTAAGGGACAGGGGCTACGAGCAGTACTTC	peak15	M1_0_F1	0	1166	CD8
TGTGCCAGCAGGTTAGGGGGGCGGCAGACGAACACCGGGGAGCTGTTTTTT	peak15	M1_0_F1	0	1167	CD8
TGTGCCAGCAGGTTCGGGGAGGGGGTATCCGTAGCTTTCTTT	peak15	M1_0_F1	0	1168	CD8
TGTGCCAGCAGTAACGGACGGAATCAGCCCCAGCATTTT	peak15	M1_0_F1	0	1169	CD8
TGTGCCAGCAGTAAGCAGGGGGAAGCTGAAGCTTTCTTT	peak15	M1_0_F1	0	1170	CD8
TGTGCCAGCAGTAAGGGGGGCGAAGCCTACGAGCAGTACTTC	peak15	M1_0_F1	0	1171	CD8
TGTGCCAGCAGTAATGGGGAGATTTCCTACGAGCAGTACTTC	peak15	M1_0_F1	0	1172	CD8
TGTGCCAGCAGTACACAAGTGGACACTGAAGCTTTCTTT	peak15	M1_0_F1	0	1173	CD4
TGTGCCAGCAGTACAGGGGTCAGGGGAGAGCAGTACGTC	peak15	M1_0_F1	0	1174	CD8
TGTGCCAGCAGTACCCTTCGGGGGGCCTCCTACAATGAGCAGTTCTTC	peak15	M1_0_F1	0	1175	CD8
TGTGCCAGCAGTACCGCCATAGGCGGCTATGGCTACACCTTC	peak10	M1_0_F1	0	1176	CD8
TGTGCCAGCAGTACCGGGCCCAATCAGCCCCAGCATTTT	peak21	M1_0_F1	0	1177	CD8
TGTGCCAGCAGTAGACAGGGGGTGGAAGAGACCCAGTACTTC	peak21	M1_0_F1	0	1178	CD8
TGTGCCAGCAGTAGCCTAGCGGGGGTTTATGAGCAGTTCTTC	peak15	M1_0_F1	0	1179	CD8
TGTGCCAGCAGTAGCGGGGGTGTGGGCTACAATGAGCAGTTCTTC	peak15	M1_0_F1	0	1180	CD8
TGTGCCAGCAGTAGGGCAGGGAGGGCCTACAATGAGCAGTTCTTC	peak15	M1_0_F1	0	1181	CD4
TGTGCCAGCAGTATAGACACCAGCTCCTACAATGAGCAGTTCTTC	peak15	M1_0_F1	0	1182	CD4
TGTGCCAGCAGTCAAACGCCTGGGTCTGGCTACACCTTC	peak15	M1_0_F1	0	1183	CD4
TGTGCCAGCAGTCAACAGGGGAGCCACGAGCAGTACGTC	peak15	M1_0_F1	0	1184	CD8
TGTGCCAGCAGTCAAGGGACAGTGTCCTACGAGCAGTACTTC	peak15	M1_0_F1	0	1185	CD8
TGTGCCAGCAGTCACGGGGCTTCCTACGAGCAGTACGTC	peak21	M1_0_F1	0	1186	CD8
TGTGCCAGCAGTCAGGGGATCTATGGCTACACCTTC	peak15	M1_0_F1	0	1187	CD8
TGTGCCAGCAGTCCAGGGACAGCCTACGAGCAGTACTTC	peak21	M1_0_F1	0	1188	CD8
TGTGCCAGCAGTCCCAGGGACAGGATTACCTACGAGCAGTACTTC	peak15	M1_0_F1	0	1189	CD8
TGTGCCAGCAGTCCCAGGGTTGATGAAAAACTGTTTTTT	peak15	M1_0_F1	0	1190	CD8
TGTGCCAGCAGTCCCCAAGGCGGGTACGAGCAGTACTTC	peak15	M1_0_F1	0	1191	CD8
TGTGCCAGCAGTCCCCAAGTGCTAGGGAACTATGGCTACACCTTC	peak21	M1_0_F1	0	1192	CD8
TGTGCCAGCAGTCCCCAGGACAGGCTGGGGCAGTACTTC	peak21	M1_0_F1	0	1193	CD4
TGTGCCAGCAGTCCCCAGGGGACAGGGGCATACGAGCAGTACTTC	peak15	M1_0_F1	0	1194	CD8
TGTGCCAGCAGTCCCCCCGGGACAGGGTCTGGAGATACTGAAGCTTTCTTT	peak15	M1_0_F1	0	1195	CD8
TGTGCCAGCAGTCCCCGGGACGGGGGGAGAAACACTGAAGCTTTCTTT	peak10	M1_0_F1	0	1196	CD4
TGTGCCAGCAGTCCCGGACAGGCCTACGAGCAGTACGTC	peak15	M1_0_F1	0	1197	CD8
TGTGCCAGCAGTCCCGGGACAGGGGGTTACGAGCAGTACTTC	peak15	M1_0_F1	0	1198	CD8
TGTGCCAGCAGTCCCGGGACGGCTAATCAGCCCCAGCATTTT	peak15	M1_0_F1	0	1199	CD8
TGTGCCAGCAGTCCCGGGACTGAAGAGCAGTTCTTC	peak10	M1_0_F1	0	1200	CD8
TGTGCCAGCAGTCCCGGGCTAGCCTACGAGCAGTACGTC	peak15	M1_0_F1	0	1201	CD8
TGTGCCAGCAGTCCCGTTTCCTTCAATCAGCCCCAGCATTTT	peak10	M1_0_F1	0	1202	CD4
TGTGCCAGCAGTCCGACAGGGGGCTATAATTCACCCCTCCACTTT	peak15	M1_0_F1	0	1203	CD8
TGTGCCAGCAGTCCGACTAGCGGGGGGACCTACGAGCAGTACGTC	peak15	M1_0_F1	0	1204	CD8
TGTGCCAGCAGTCCGCCTTACTCTGGGGCCAACGTCCTGACTTTC	peak5	M1_0_F1	0	1205	CD8
TGTGCCAGCAGTCCGGACAGCTACGAGCAGTACTTC	peak15	M1_0_F1	3.08e-06	1206	CD8
TGTGCCAGCAGTCCGGCCGGGGGGTGGTACACCTTC	peak21	M1_0_F1	0	1207	CD4
TGTGCCAGCAGTCCGGGACAGAGGAGAGGTTTAAATCAGCCCCAGCATTTT	peak15	M1_0_F1	0	1208	CD8
TGTGCCAGCAGTCCGGGACAGGGATCCTACGAGCAGTACGTC	peak10	M1_0_F1	0	1209	CD8
TGTGCCAGCAGTCCGGGGACAGGGGCTTACGAGCAGTACTTC	peak15	M1_0_F1	0	1210	CD8
TGTGCCAGCAGTCCGGGTCTCTCCTACGAGCAGTACGTC	peak15	M1_0_F1	0	1211	CD8
TGTGCCAGCAGTCCGTCTCGTGGGGTTGGCGGAAACATTCAGTACTTC	peak15	M1_0_F1	0	1212	CD4
TGTGCCAGCAGTCCTGACACGAGCTCCTACAATGAGCAGTTCTTC	peak15	M1_0_F1	0	1213	CD4
TGTGCCAGCAGTCCTGGGACAGGGGGCTACGAGCAGTACGTC	peak15	M1_0_F1	0	1214	CD8
TGTGCCAGCAGTCCTGGGCCGTGGGGTATTGCTTTCTTT	peak15	M1_0_F1	0	1215	CD8
TGTGCCAGCAGTCGAGGGGGGAGTGGCTACACCTTC	peak21	M1_0_F1	0	1216	CD8
TGTGCCAGCAGTCGATCCGGGACGGAGGCCTACGAGCAGTACTTC	peak21	M1_0_F1	0	1217	CD8
TGTGCCAGCAGTCTACCAGGAGCGGGGGCCTCAGATACGCAGTATTTT	peak15	M1_0_F1	0	1218	CD4
TGTGCCAGCAGTCTACCGGGACAGGGATTCAGCTCCTACGAGCAGTACTTC	peak15	M1_0_F1	0	1219	CD8
TGTGCCAGCAGTCTCAGGGGGCCGGAGCAGTTCTTC	peak15	M1_0_F1	0	1220	CD8
TGTGCCAGCAGTCTCCCAGGACAGGAGTACAAAACAGATACGCAGTATTTT	peak10	M1_0_F1	0	1221	CD8
TGTGCCAGCAGTCTTTCCACGGTCGGATGGAACACTGAAGCTTTCTTT	peak10	M1_0_F1	0	1222	CD8
TGTGCCAGCAGTGAAAACGGACAGACTGAAGCTTTCTTT	peak10	M1_0_F1	0	1223	CD8
TGTGCCAGCAGTGAAAATGAAGGGAACTATGGCTACACCTTC	peak21	M1_0_F1	0	1224	CD8
TGTGCCAGCAGTGAACCGGGACAAGGTTTTGCTTCCTACGAGCAGTACGTC	peak15	M1_0_F1	0	1225	CD8
TGTGCCAGCAGTGAACGGGCGGGGGGGGTTGGAGATACGCAGTATTTT	peak15	M1_0_F1	0	1226	CD8
TGTGCCAGCAGTGAACTCCCAGGGGTAGGTCTCTACGAGCAGTACTTC	peak15	M1_0_F1	0	1227	CD8
TGTGCCAGCAGTGAAGAGGGTCTAGCGGGGACCGGGGAGCTGTTTTTT	peak10	M1_0_F1	0	1228	CD8
TGTGCCAGCAGTGAAGCGCTTCCGGGGGCCTATGGCTACACCTTC	peak15	M1_0_F1	0	1229	CD8
TGTGCCAGCAGTGAAGGAAGGAGTACCTATAATTCACCCCTCCACTTT	peak15	M1_0_F1	0	1230	CD4
TGTGCCAGCAGTGAAGGCAGCGCCTACGAGCAGTACTTC	peak15	M1_0_F1	0	1231	CD8
TGTGCCAGCAGTGAAGGGACGTGGGCTCGAATTGAAGCTTTCTTT	peak15	M1_0_F1	0	1232	CD8
TGTGCCAGCAGTGAAGGGAGCAATAATGAAAAACTGTTTTTT	peak15	M1_0_F1	0	1233	CD8
TGTGCCAGCAGTGAAGGGGATCCCTTCTATGGAGGCTACACCTTC	peak15	M1_0_F1	0	1234	CD4
TGTGCCAGCAGTGAAGGGGTCAGAGGATTCACAGATACGCAGTATTTT	peak15	M1_0_F1	0	1235	CD8
TGTGCCAGCAGTGAATCCAGCGAGTTCATCTATGGCTACACCTTC	peak15	M1_0_F1	0	1236	CD8
TGTGCCAGCAGTGAATGGGGTCCGGGTGGCTACACCTTC	peak21	M1_0_F1	0	1237	CD8
TGTGCCAGCAGTGACACGGGCGGGGGCACCACCGGGGAGCTGTTTTTT	peak15	M1_0_F1	0	1238	CD4
TGTGCCAGCAGTGACAGGGAGGTCTATGGCTACACCTTC	peak21	M1_0_F1	0	1239	CD8
TGTGCCAGCAGTGACCCGGGACTACAAGAGGGAGGAGAGACCCAGTACTTC	peak10	M1_0_F1	0	1240	CD8
TGTGCCAGCAGTGACGGACAGGGGGCGTCCTATGGCTACACCTTC	peak15	M1_0_F1	0	1241	CD8
TGTGCCAGCAGTGACGGTCCCTCCTACGAGCAGTACGTC	peak21	M1_0_F1	0	1242	CD8
TGTGCCAGCAGTGACTCCCCGGGACTAGCCTACGAGCAGTACTTC	peak15	M1_0_F1	0	1243	CD8
TGTGCCAGCAGTGAGCAAATCTATGGCTACACCTTC	peak15	M1_0_F1	0	1244	CD8
TGTGCCAGCAGTGAGCACGGCAGAGGCTACACCTTC	peak15	M1_0_F1	0	1245	CD8
TGTGCCAGCAGTGAGCAGGGGGCTTATGGCTACACCTTC	peak21	M1_0_F1	0	1246	CD8
TGTGCCAGCAGTGAGGGACAGGGAAGCAATCAGCCCCAGCATTTT	peak21	M1_0_F1	0	1247	CD8
TGTGCCAGCAGTGAGGGGACGGAGGCCTACGAGCAGTACTTC	peak15	M1_0_F1	0	1248	CD8
TGTGCCAGCAGTGAGGGGGCCCCAAAGGGCTTC	peak10	M1_0_F1	0	1249	CD4
TGTGCCAGCAGTGAGGGTGGCAGCTCCTATAATTCACCCCTCCACTTT	peak15	M1_0_F1	0	1250	CD4
TGTGCCAGCAGTGATATATCTGAGAGTAGAGGCTACACCTTC	peak15	M1_0_F1	0	1251	CD8
TGTGCCAGCAGTGATGGGACAGGGGGCGCCTATGGCTACACCTTC	peak15	M1_0_F1	0	1252	CD8
TGTGCCAGCAGTGATGGGTCAGGACAGCCCCAGCATTTT	peak15	M1_0_F1	0	1253	CD8
TGTGCCAGCAGTGATTACGTAGCTAATGAGCAGTTCTTC	peak21	M1_0_F1	0	1254	CD8
TGTGCCAGCAGTGCAGGAGGGGCCTACGAGCAGTACTTC	peak21	M1_0_F1	0	1255	CD8
TGTGCCAGCAGTGCAGTTTGGGATGAGCAGTTCTTC	peak10	M1_0_F1	0	1257	CD4
TGTGCCAGCAGTGCCACACCGGGACAGCGCACAGATACGCAGTATTTT	peak15	M1_0_F1	0	1258	CD4
TGTGCCAGCAGTGCCGCACCAGGGGATCGGAATGAGCAGTTCTTC	peak21	M1_0_F1	0	1259	CD8
TGTGCCAGCAGTGCCGCAGGGGCCTACGAGCAGTACTTC	peak21	M1_0_F1	0	1260	CD8
TGTGCCAGCAGTGCCGCCGGGACCCCTGCCTACGAGCAGTACTTC	peak21	M1_0_F1	0	1261	CD8
TGTGCCAGCAGTGCCGGGTGGATCTCCTACGAGCAGTACTTC	peak21	M1_0_F1	0	1262	CD8
TGTGCCAGCAGTGCGGGACAGAACGCCTACGAGCAGTACTTC	peak15	M1_0_F1	0	1263	CD8
TGTGCCAGCAGTGCGGGACAGGCAGTCAACATTCAGTACTTC	peak10	M1_0_F1	2.05e-06	1264	CD4
TGTGCCAGCAGTGCGGGGGCTGGCCAGCCCCAGCATTTT	peak10	M1_0_F1	0	1265	CD8
TGTGCCAGCAGTGCGGGGGTCCTTCAGCCCCAGCATTTT	peak15	M1_0_F1	0	1266	CD8
TGTGCCAGCAGTGCGGTGTGGGATAATGAGCAGTTCTTC	peak15	M1_0_F1	0	1267	CD4
TGTGCCAGCAGTGGACAGGGCTCCTACGAGCAGTACGTC	peak15	M1_0_F1	0	1268	CD8
TGTGCCAGCAGTGGACAGGGGGCATATGAGCAGTTCTTC	peak21	M1_0_F1	0	1269	CD8
TGTGCCAGCAGTGGACAGGGGGCCTACGAGCAGTACGTC	peak15	M1_0_F1	0	1270	CD8
TGTGCCAGCAGTGGACAGGGGGCCTACGAGCAGTACTTC	peak15	M1_0_F1	0	1271	CD8
TGTGCCAGCAGTGGACAGGGGGCTTATGAGCAGTTCTTC	peak15	M1_0_F1	0	1272	CD8
TGTGCCAGCAGTGGACAGGGTATCGCCTACGAGCAGTACTTC	peak15	M1_0_F1	0	1273	CD8
TGTGCCAGCAGTGGAGCAGGGGGCGCCTATGGCTACACCTTC	peak15	M1_0_F1	0	1274	CD8
TGTGCCAGCAGTGGCGCCTACGAGCAGTACTTC	peak21	M1_0_F1	0	1275	CD8
TGTGCCAGCAGTGGGACAGAGGCCTACGAGCAGTACTTC	peak15	M1_0_F1	0	1276	CD8
TGTGCCAGCAGTGGGGACGGAAACAATGAGCAGTTCTTC	peak10	M1_0_F1	0	1277	CD8
TGTGCCAGCAGTGGTTCTAGCGGGGGCACCTTAGATACGCAGTATTTT	peak15	M1_0_F1	0	1278	CD4
TGTGCCAGCAGTGTACAAGGGGCCCAAGATACGCAGTATTTT	peak10	M1_0_F1	0	1279	CD4
TGTGCCAGCAGTGTCACAAACACTGAAGCTTTCTTT	peak15	M1_0_F1	0	1280	CD8
TGTGCCAGCAGTGTCACTCAGGTCGTCCAGCCCCAGCATTTT	peak15	M1_0_F1	0	1281	CD8
TGTGCCAGCAGTGTGACAGGCGCCTACGAGCAGTACTTC	peak15	M1_0_F1	0	1282	CD8
TGTGCCAGCAGTGTGGACCAGGGAGAAACAGATACGCAGTATTTT	peak15	M1_0_F1	0	1283	CD4
TGTGCCAGCAGTGTGGGACCTGACACTGAAGCTTTCTTT	peak5	M1_0_F1	0	1284	CD8
TGTGCCAGCAGTGTGGTAGGGACAGGGGCCTACGAGCAGTACGTC	peak21	M1_0_F1	0	1285	CD8
TGTGCCAGCAGTGTTCGGGGAGGGAATGAGCAGTTCTTC	peak15	M1_0_F1	0	1286	CD8
TGTGCCAGCAGTGTTGGGGTGAACACTGAAGCTTTCTTT	peak15	M1_0_F1	0	1287	CD4
TGTGCCAGCAGTTACACAGGGGCCTACGAGCAGTACGTC	peak15	M1_0_F1	0	1288	CD8
TGTGCCAGCAGTTACACGGTTAACAATGAGCAGTTCTTC	peak15	M1_0_F1	0	1289	CD8
TGTGCCAGCAGTTACCCAGGGGTCCAAGAGACCCAGTACTTC	peak10	M1_0_F1	0	1290	CD4
TGTGCCAGCAGTTACCCCGGGACGGCCTATGGCTACACCTTC	peak15	M1_0_F1	0	1291	CD8
TGTGCCAGCAGTTACCCGAATCAGCCCCAGCATTTT	peak10	M1_0_F1	0	1292	CD8
TGTGCCAGCAGTTACCCGGGACAGGCTTTCCTTTCTTACGAGCAGTACTTC	peak21	M1_0_F1	0	1293	CD8
TGTGCCAGCAGTTACCCGGGACAGGGGCTAAGCTCCTACGAGCAGTACTTC	peak15	M1_0_F1	0	1294	CD8
TGTGCCAGCAGTTACCCGGGACAGGGGTACTCAACCTACGAGCAGTACTTC	peak15	M1_0_F1	0	1295	CD8
TGTGCCAGCAGTTACCCTGGACAGGGGTTTTTATCCTACGAGCAGTACTTC	peak21	M1_0_F1	0	1296	CD8
TGTGCCAGCAGTTACCGGGACGCCGGCTACGAGCAGTACTTC	peak5	M1_0_F1	0	1297	CD4
TGTGCCAGCAGTTACCTACAGACCGCCAACTACGAGCAGTACTTC	peak10	M1_0_F1	0	1298	CD8
TGTGCCAGCAGTTACCTACTAGTTGAGCAGTTCTTC	peak15	M1_0_F1	0	1299	CD8
TGTGCCAGCAGTTACGACAGAGGAGAGACCCAGTACTTC	peak15	M1_0_F1	2.05e-06	1300	CD8
TGTGCCAGCAGTTACGACAGGGGGGAGACCCAGTACTTC	peak15	M1_0_F1	0	1301	CD8
TGTGCCAGCAGTTACGACAGGGGTGAGACCCAGTACTTC	peak15	M1_0_F1	0	1302	CD8
TGTGCCAGCAGTTACGGGACAGCGTATGGCTACACCTTC	peak21	M1_0_F1	0	1303	CD8
TGTGCCAGCAGTTACGGGGACAGCTACGAGCAGTACTTC	peak15	M1_0_F1	0	1304	CD8
TGTGCCAGCAGTTACGGGGGGGCCCGGATAGATACGCAGTATTTT	peak10	M1_0_F1	0	1305	CD4
TGTGCCAGCAGTTACGGGGTCTCGGGACAGTTCTATGGCTACACCTTC	peak15	M1_0_F1	0	1306	CD8
TGTGCCAGCAGTTACGTATCTACAGGGGGAACTGAAAAACTGTTTTTT	peak21	M1_0_F1	0	1307	CD8
TGTGCCAGCAGTTACTCAACCACAGGGGGCGCAAACACTGAAGCTTTCTTT	peak15	M1_0_F1	0	1308	CD8
TGTGCCAGCAGTTACTCAGGGACTTCTGGGACCCAGTACTTC	peak10	M1_0_F1	0	1309	CD4
TGTGCCAGCAGTTACTCATTCACAGGGGCTGGCACTGAAGCTTTCTTT	peak10	M1_0_F1	0	1311	CD8
TGTGCCAGCAGTTACTCCCAGCGGGGAGCGGTC	peak15	M1_0_F1	0	1312	CD8
TGTGCCAGCAGTTACTCCCAGGACAGGGGGTATAATTCACCCCTCCACTTT	peak15	M1_0_F1	0	1313	CD4
TGTGCCAGCAGTTACTCGAACACAGCCTACGAGCAGTACTTC	peak15	M1_0_F1	0	1314	CD8
TGTGCCAGCAGTTACTCGACGCCAGCTACAAACAATGAGCAGTTCTTC	peak15	M1_0_F1	0	1315	CD8
TGTGCCAGCAGTTACTCGAGGACAGGCGCCTATGGCTACACCTTC	peak15	M1_0_F1	0	1316	CD8
TGTGCCAGCAGTTACTCGCCAGGGGGTGCCTCACCCCTCCACTTT	peak15	M1_0_F1	0	1317	CD8
TGTGCCAGCAGTTACTCGGGACAGGGGGCGATTGAGCCCCAGCATTTT	peak10	M1_0_F1	0	1318	CD8
TGTGCCAGCAGTTACTCGGGACAGGGTTTTAGCACAGATACGCAGTATTTT	peak21	M1_0_F1	0	1319	CD8
TGTGCCAGCAGTTACTCGGGAGACCCTGAAGCTTTCTTT	peak15	M1_0_F1	0	1320	CD8
TGTGCCAGCAGTTACTCGTCGACTGGGGCCTACGAGCAGTACTTC	peak10	M1_0_F1	0	1321	CD8
TGTGCCAGCAGTTACTCTCTGGACAGGGGCTATAATTCACCCCTCCACTTT	peak15	M1_0_F1	0	1322	CD4
TGTGCCAGCAGTTACTTCAGTAGCGGGGAGCTGTTTTTT	peak15	M1_0_F1	0	1323	CD8
TGTGCCAGCAGTTATATGACAGGGGAACAAGAGACCCAGTACTTC	peak15	M1_0_F1	0	1324	CD4
TGTGCCAGCAGTTATCCCAATCAGCCCCAGCATTTT	peak21	M1_0_F1	0	1325	CD8
TGTGCCAGCAGTTATCTACAGGGTCTCAGGAACACCGGGGAGCTGTTTTTT	peak15	M1_0_F1	0	1326	CD8
TGTGCCAGCAGTTATTCGGACGGTGGCACCGGGGAGCTGTTTTTT	peak15	M1_0_F1	0	1327	CD8
TGTGCCAGCAGTTCACAGGGGGCATATGGCTACACCTTC	peak21	M1_0_F1	0	1328	CD8
TGTGCCAGCAGTTCACTTCAGGGCTACTATGGCTACACCTTC	peak15	M1_0_F1	0	1329	CD4
TGTGCCAGCAGTTCAGCTTACACTGAAGCTTTCTTT	peak15	M1_0_F1	0	1330	CD8
TGTGCCAGCAGTTCAGGGCCGAACGGCGCCTACGAGCAGTACTTC	peak21	M1_0_F1	0	1331	CD8
TGTGCCAGCAGTTCAGGGGGCGGCCAGCCCCAGCATTTT	peak15	M1_0_F1	0	1332	CD8
TGTGCCAGCAGTTCAGGGTCCCAAGAGACCCAGTACTTC	peak15	M1_0_F1	0	1333	CD4
TGTGCCAGCAGTTCCACATCCGGACCAACCCTAACTAAAGTCGGGGAGCTGTTTTTT	peak15	M1_0_F1	0	1334	CD8
TGTGCCAGCAGTTCCATCGACAGGGGAGGGGGTGAAAAACTGTTTTTT	peak15	M1_0_F1	0	1335	CD8
TGTGCCAGCAGTTCCCCACTAGCGGGCATGGACACAGATACGCAGTATTTT	peak10	M1_0_F1	0	1336	CD4
TGTGCCAGCAGTTCCCCTTCTGGGGCCAACGTCCTGACTTTC	peak15	M1_0_F1	0	1337	CD4
TGTGCCAGCAGTTCCGGAGGCGAAGCTTTCTTT	peak15	M1_0_F1	0	1339	CD8
TGTGCCAGCAGTTCCGGGACAGCCTACGAGCAGTACGTC	peak15	M1_0_F1	0	1340	CD8
TGTGCCAGCAGTTCCTCCCCCGGGGGTAGCTCCTACGAGCAGTACTTC	peak15	M1_0_F1	0	1341	CD8
TGTGCCAGCAGTTCGACAGGGGCCTACGAGCAGTACTTC	peak21	M1_0_F1	0	1342	CD8
TGTGCCAGCAGTTCGAGCGGTGGCTCCTACAATGAGCAGTTCTTC	peak5	M1_0_F1	0	1343	CD8
TGTGCCAGCAGTTCGCGGGGTGAAGATACGCAGTATTTT	peak10	M1_0_F1	0	1344	CD4
TGTGCCAGCAGTTCGGCCTCCCTAGGCTACACCTTC	peak15	M1_0_F1	0	1345	CD4
TGTGCCAGCAGTTCGGGACTAGCCTACGAGCAGTACTTC	peak15	M1_0_F1	0	1346	CD8
TGTGCCAGCAGTTCTCAGGGGGCGGGAGATACGCAGTATTTT	peak21	M1_0_F1	0	1347	CD4
TGTGCCAGCAGTTCTCCCAACCAGGATCAGTACTTC	peak21	M1_0_F1	4.1e-06	1348	CD4
TGTGCCAGCAGTTCTCCGGGACACCTGTATGGATATGAGCAGTTCTTC	peak5	M1_0_F1	0	1349	CD4
TGTGCCAGCAGTTCTGGACGTGGGGGGGGCAGCACAGATACGCAGTATTTT	peak21	M1_0_F1	0	1350	CD8
TGTGCCAGCAGTTCTGGATTTGCATTTACGCAGTATTTT	peak15	M1_0_F1	0	1351	CD8
TGTGCCAGCAGTTCTGGGACCTATGCTCCCAGCTCCTACAATGAGCAGTTCTTC	peak15	M1_0_F1	0	1352	CD4
TGTGCCAGCAGTTCTTTAGGGGTTGAGCAGTTCTTC	peak15	M1_0_F1	0	1353	CD8
TGTGCCAGCAGTTGGCCGGGACGTCAGCTTAATGAAAAACTGTTTTTT	peak15	M1_0_F1	0	1354	CD8
TGTGCCAGCAGTTGGCGGGACGGTTCTGGAAACACCATATATTTT	peak15	M1_0_F1	0	1355	CD8
TGTGCCAGCAGTTGGGCGGGCACAGGGTACGAGCAGTACGTC	peak10	M1_0_F1	0	1356	CD8
TGTGCCAGCAGTTGGGGGGCCCTGGGAAACACCATATATTTT	peak15	M1_0_F1	0	1357	CD4
TGTGCCAGCAGTTGGGGGGTAGCGGGCCACAATGAGCAGTTCTTC	peak15	M1_0_F1	0	1358	CD8
TGTGCCAGCAGTTTAAACCACTACAATGAGCAGTTCTTC	peak15	M1_0_F1	0	1359	CD4
TGTGCCAGCAGTTTAAACGGGAACACCATATATTTT	peak15	M1_0_F1	0	1360	CD4
TGTGCCAGCAGTTTAAATGCCGAGTCTAGCGGCTACACCTTC	peak15	M1_0_F1	0	1361	CD8
TGTGCCAGCAGTTTAACGGGACTAGCGGCCGTCACCTACGAGCAGTACTTC	peak21	M1_0_F1	0	1362	CD8
TGTGCCAGCAGTTTAAGCCGGAGCTACGAGCAGTACTTC	peak5	M1_0_F1	0	1363	CD4
TGTGCCAGCAGTTTAAGCGGGGTCTACAATGAGCAGTTCTTC	peak10	M1_0_F1	0	1364	CD8
TGTGCCAGCAGTTTAAGTCCAGAGGGTGAAAAACTGTTTTTT	peak10	M1_0_F1	0	1365	CD4
TGTGCCAGCAGTTTAATGACGACAGGGGATGAGCAGTTCTTC	peak15	M1_0_F1	0	1366	CD4
TGTGCCAGCAGTTTACAAGGGTCAAACTATGGCTACACCTTC	peak15	M1_0_F1	0	1367	CD8
TGTGCCAGCAGTTTACAGGGATCTGGGTCCCACACAGATACGCAGTATTTT	peak15	M1_0_F1	0	1368	CD8
TGTGCCAGCAGTTTACAGTCCGCAGGGGCTAACTATGGCTACACCTTC	peak10	M1_0_F1	0	1369	CD8
TGTGCCAGCAGTTTACTTACTAGTGTATACACCGGGGAGCTGTTTTTT	peak15	M1_0_F1	0	1370	CD8
TGTGCCAGCAGTTTAGAACTCGAGGGGCTCGAGCAGTACTTC	peak21	M1_0_F1	0	1371	CD4
TGTGCCAGCAGTTTAGAGGGGTTTCAAGAGACCCAGTACTTC	peak21	M1_0_F1	0	1372	CD8
TGTGCCAGCAGTTTAGCCCCCCTGGCCCAGGCGAACATTCAGTACTTC	peak15	M1_0_F1	0	1373	CD8
TGTGCCAGCAGTTTAGGAAAGAGCTCCTATAATTCACCCCTCCACTTT	peak15	M1_0_F1	0	1374	CD4
TGTGCCAGCAGTTTAGGCCAGATCCTTACTAATTATAATTCACCCCTCCACTTT	peak15	M1_0_F1	0	1375	CD4
TGTGCCAGCAGTTTAGGCGGACAGGCGGGGGAGACCCAGTACTTC	peak21	M1_0_F1	0	1377	CD8
TGTGCCAGCAGTTTAGGCTGGGGGAATCAGCCCCAGCATTTT	peak10	M1_0_F1	0	1378	CD4
TGTGCCAGCAGTTTAGGGGGAGTCTACGAGCAGTACTTC	peak15	M1_0_F1	0	1379	CD8
TGTGCCAGCAGTTTAGTCGACAGGCTCAATCAGCCCCAGCATTTT	peak21	M1_0_F1	0	1380	CD8
TGTGCCAGCAGTTTATACGGGGGGTCGAACACTGAAGCTTTCTTT	peak15	M1_0_F1	0	1381	CD8
TGTGCCAGCAGTTTATATGGGGGTAACACCGGGGAGCTGTTTTTT	peak15	M1_0_F1	0	1382	CD8
TGTGCCAGCAGTTTATCCGGAGGGTTGGTTGGGGAGCTGTTTTTT	peak21	M1_0_F1	0	1383	CD8
TGTGCCAGCAGTTTATCGACGGGGGGCCTCACCGGGGAGCTGTTTTTT	peak15	M1_0_F1	0	1384	CD8
TGTGCCAGCAGTTTATCGATCCTTCAGCCCCAGCATTTT	peak15	M1_0_F1	0	1385	CD8
TGTGCCAGCAGTTTATCGGCAGGGGGATACGAGCAGTACGTC	peak15	M1_0_F1	0	1386	CD8
TGTGCCAGCAGTTTATTAGGCCATGGGCAGTACTTC	peak15	M1_0_F1	0	1387	CD4
TGTGCCAGCAGTTTATTAGGGACAGGGGCGAACACCGGGGAGCTGTTTTTT	peak15	M1_0_F1	0	1388	CD8
TGTGCCAGCAGTTTCACAGGGGGCGTAGATACGCAGTATTTT	peak10	M1_0_F1	0	1389	CD4
TGTGCCAGCAGTTTCAGAACAGGGGGGACAGATACGCAGTATTTT	peak21	M1_0_F1	0	1390	CD8
TGTGCCAGCAGTTTCCAGAAAAACACCGGGGAGCTGTTTTTT	peak10	M1_0_F1	1.03e-06	1391	CD4
TGTGCCAGCAGTTTCCCCGGACAGGGACTATCCTCCTACGAGCAGTACTTC	peak15	M1_0_F1	0	1392	CD8
TGTGCCAGCAGTTTCCCGGGACAGGGGATGGGCTCCTACGAGCAGTACTTC	peak15	M1_0_F1	0	1393	CD8
TGTGCCAGCAGTTTCGACAGGAACTACGAGCAGTACTTC	peak10	M1_0_F1	0	1395	CD4
TGTGCCAGCAGTTTCGCCCCGGGGGATAGCACCGGGGAGCTGTTTTTT	peak5	M1_0_F1	0	1396	CD4
TGTGCCAGCAGTTTCGGACTAGCGGGGTCCTTAGAGCAGTTCTTC	peak10	M1_0_F1	0	1397	CD4
TGTGCCAGCAGTTTCGGCAGGGCCTACGAGCAGTACGTC	peak15	M1_0_F1	0	1398	CD8
TGTGCCAGCAGTTTCGGGACAGGAGCGAACACTGAAGCTTTCTTT	peak15	M1_0_F1	0	1399	CD4
TGTGCCAGCAGTTTCTACACCCTGACCTATGGCTACACCTTC	peak21	M1_0_F1	0	1400	CD8
TGTGCCAGCAGTTTCTATACTAGTTCCGGGGAGCTGTTTTTT	peak10	M1_0_F1	0	1401	CD8
TGTGCCAGCAGTTTCTTCTGGACAGGGCACACCGGGGAGCTGTTTTTT	peak15	M1_0_F1	0	1402	CD8
TGTGCCAGCAGTTTCTTGGGATCTGAAGCTTTCTTT	peak15	M1_0_F1	0	1403	CD4
TGTGCCAGCAGTTTGAGGCAGGGCCTAAACTCCTATAATTCACCCCTCCACTTT	peak10	M1_0_F1	0	1404	CD8
TGTGCCAGCAGTTTGCCGGGACAGGGGATGAGCTCCTACGAGCAGTACGTC	peak15	M1_0_F1	0	1405	CD8
TGTGCCAGCAGTTTGCTAGCGAGGAGCACAGATACGCAGTATTTT	peak15	M1_0_F1	0	1406	CD8
TGTGCCAGCAGTTTGGAAACCGTCGGAAACATTCAGTACTTC	peak21	M1_0_F1	0	1407	CD4
TGTGCCAGCAGTTTGGCATTAAGTCGGGGGTATAATTCACCCCTCCACTTT	peak15	M1_0_F1	0	1408	CD4
TGTGCCAGCAGTTTGGGAATCTATGGCTACACCTTC	peak15	M1_0_F1	0	1409	CD8
TGTGCCAGCAGTTTGGGCGCGATACAGCCCCAGCATTTT	peak15	M1_0_F1	0	1410	CD4
TGTGCCAGCAGTTTGGGCGGCGTCTACGAGCAGTACTTC	peak15	M1_0_F1	0	1411	CD8
TGTGCCAGCAGTTTGGGGGGCTCCTACGAGCAGTACGTC	peak10	M1_0_F1	0	1412	CD8
TGTGCCAGCAGTTTGGGGGGGACAGGCACCTACGAGCAGTACTTC	peak15	M1_0_F1	0	1413	CD8
TGTGCCAGCAGTTTGGGGGGGGCTGGAAGTCAGCCCCAGCATTTT	peak21	M1_0_F1	0	1414	CD8
TGTGCCAGCAGTTTGGGGGGTAGGGGGACGACCCAGTACTTC	peak10	M1_0_F1	0	1415	CD4
TGTGCCAGCAGTTTGTCCCGAGGGGGTCAAGAGACCCAGTACTTC	peak15	M1_0_F1	0	1416	CD4
TGTGCCAGCAGTTTTAATGGGCCCAACTATGGCTACACCTTC	peak21	M1_0_F1	0	1417	CD8
TGTGCCAGCAGTTTTACCTCTAACTATGGCTACACCTTC	peak21	M1_0_F1	0	1418	CD8
TGTGCCAGCAGTTTTACTCAGGGGTTCTCCACAGATACGCAGTATTTT	peak15	M1_0_F1	0	1419	CD8
TGTGCCAGCAGTTTTAGTTCGGTCGGCGGGTACGAGCAGTACTTC	peak15	M1_0_F1	0	1420	CD4
TGTGCCAGCAGTTTTCCCGGACAGGGGGCTGCCGGGGAGCTGTTTTTT	peak15	M1_0_F1	0	1422	CD8
TGTGCCAGCAGTTTTCGACAGGGACTTAGCTCCTATAATTCACCCCTCCACTTT	peak15	M1_0_F1	0	1423	CD8
TGTGCCAGCAGTTTTGGATTCACAGATACGCAGTATTTT	peak21	M1_0_F1	0	1424	CD8
TGTGCCAGCAGTTTTGGCACCGGCACCGGCACTGAAGCTTTCTTT	peak15	M1_0_F1	0	1425	CD4
TGTGCCAGCAGTTTTGGGACAACGAACACTGAAGCTTTCTTT	peak15	M1_0_F1	0	1426	CD4
TGTGCCAGCAGTTTTGGGACAGGGTCGGGAACTGAAGCTTTCTTT	peak15	M1_0_F1	0	1427	CD4
TGTGCCAGCAGTTTTTCTGTTTTGTCACCCCTCCACTTT	peak15	M1_0_F1	0	1429	CD8
TGTGCCAGCAGTTTTTGGGCCCCGAACACCGGGGAGCTGTTTTTT	peak10	M1_0_F1	0	1430	CD4
TGTGCCAGCAGTTTTTGGGCGAACACCGGGGAGCTGTTTTTT	peak15	M1_0_F1	1.03e-06	1431	CD8
TGTGCCAGCATAAAAGAGTGGGCGACCACCGGGGAGCTGTTTTTT	peak15	M1_0_F1	0	1432	CD4
TGTGCCAGCATAGGGCAGGGTCACGGGGAGCTGTTTTTT	peak15	M1_0_F1	0	1433	CD8
TGTGCCAGCATCAATAGCGGGGGGCTTTATACGCAGTATTTT	peak15	M1_0_F1	0	1434	CD8
TGTGCCAGCATCATGGGGAGCGGGGCCTCCTACAATGAGCAGTTCTTC	peak15	M1_0_F1	0	1435	CD8
TGTGCCAGCATCCTAGCGGGGTTCTACGAGCAGTACTTC	peak10	M1_0_F1	0	1436	CD8
TGTGCCAGCATCGCCGGGACAGGGCCCTCCTACGAGCAGTACTTC	peak15	M1_0_F1	0	1437	CD4
TGTGCCAGCATCTACCTTGACGGGGGTGAGCAGTTCTTC	peak15	M1_0_F1	0	1439	CD4
TGTGCCAGCATGAACGGGGGGATCGGGCCTAGCACAGATACGCAGTATTTT	peak10	M1_0_F1	1.03e-06	1440	CD4
TGTGCCAGCATTCGGACAGGGGGCTGGACGGAAGCTTTCTTT	peak15	M1_0_F1	0	1441	CD4
TGTGCCAGCATTGGGGGGGCGTTAGGCACTGAAGCTTTCTTT	peak10	M1_0_F1	0	1442	CD4
TGTGCCAGCCACAGGGACACCGGGGAGCTGTTTTTT	peak10	M1_0_F1	0	1443	CD4
TGTGCCAGCCCCTCTCGAGCATCCTATAATTCACCCCTCCACTTT	peak10	M1_0_F1	0	1444	CD8
TGTGCCAGCCCTAGCGGGGAGTCGCCTAGCACAGATACGCAGTATTTT	peak15	M1_0_F1	0	1445	CD8
TGTGCCAGCCGACCGGGACTCGAGCAGCCTGAGCAGTTCTTC	peak21	M1_0_F1	0	1446	CD8
TGTGCCAGCCGAGGCACCCTAGAGGAGCAGTACTTC	peak15	M1_0_F1	0	1447	CD8
TGTGCCAGCCGCCGCCGAGCGGCGAACACCGGGGAGCTGTTTTTT	peak15	M1_0_F1	0	1448	CD4
TGTGCCAGCCGCGGAGAGTCACCCCTCCACTTT	peak5	M1_0_F1	0	1449	CD4
TGTGCCAGCGAAAGTCATATGGGTGAGCAGTTCTTC	peak10	M1_0_F1	0	1450	CD8
TGTGCCAGCGAAGGAGGCAATGGTCCCCAGCATTTT	peak21	M1_0_F1	0	1451	CD8
TGTGCCAGCGACAAGACAGGGGGCGTACTCACAGATACGCAGTATTTT	peak10	M1_0_F1	0	1452	CD4
TGTGCCAGCGAGCCGGGACAGGGGTGGTCAGATACGCAGTATTTT	peak15	M1_0_F1	0	1453	CD4
TGTGCCAGCGCCAGCGGGCCGGCCTACGAGCAGTACTTC	peak21	M1_0_F1	0	1454	CD8
TGTGCCAGCGCCTCCGGGGGCCCCGCCTACGAGCAGTACTTC	peak15	M1_0_F1	0	1455	CD8
TGTGCCAGCGCTGACAACTATGGCTACACCTTC	peak15	M1_0_F1	0	1456	CD4
TGTGCCAGCGGAACCGGGACAGGGGGTTACGAGCAGTACTTC	peak10	M1_0_F1	0	1457	CD8
TGTGCCAGCGGAGGATACCAAGAGACCCAGTACTTC	peak15	M1_0_F1	0	1458	CD4
TGTGCCAGCGGAGTCGTGTGGGACACTGAAGCTTTCTTT	peak15	M1_0_F1	0	1459	CD4
TGTGCCAGCGGCGGACAGGGGGCCTACGAGCAGTACTTC	peak15	M1_0_F1	0	1460	CD8
TGTGCCAGCGGCGGATCTGGGACTCTAGCGGGGTACGAGCAGTACGTC	peak15	M1_0_F1	0	1461	CD8
TGTGCCAGCGGCTCAACAGGGAGCAATCAGCCCCAGCATTTT	peak21	M1_0_F1	0	1462	CD8
TGTGCCAGCGGGATCACCTCCCTCGGCGCCTACGAGCAGTACTTC	peak10	M1_0_F1	0	1463	CD8
TGTGCCAGCGGGGGCGGGGTCGGTTACAATGAGCAGTTCTTC	peak15	M1_0_F1	0	1464	CD8
TGTGCCAGCGGGTCCGCGACTAATGAAAAACTGTTTTTT	peak15	M1_0_F1	0	1465	CD4
TGTGCCAGCGGTCCTAAGGGGAATGGCTACACCTTC	peak15	M1_0_F1	0	1466	CD4
TGTGCCAGCGGTTCCCCGGACGGCTCTGGCTACACCTTC	peak21	M1_0_F1	0	1467	CD8
TGTGCCAGCGTATTAACGGGGGCCACCACAGATACGCAGTATTTT	peak15	M1_0_F1	0	1468	CD8
TGTGCCAGCGTCCGGGTCGCAGAGGCGGGAAAACTGTTTTTT	peak15	M1_0_F1	0	1469	CD8
TGTGCCAGCGTCCTACAGGGGGCAACTGAAGCTTTCTTT	peak15	M1_0_F1	0	1470	CD8
TGTGCCAGCGTCGGCGGGGGTTCCTACGAGCAGTACTTC	peak15	M1_0_F1	0	1471	CD8
TGTGCCAGCGTTCCGGGACGGAACAATGAGCAGTTCTTC	peak15	M1_0_F1	0	1472	CD8
TGTGCCAGCTCACCACCAGGGGGCAGTTACTACAATGAGCAGTTCTTC	peak15	M1_0_F1	0	1473	CD4
TGTGCCAGCTCACCACCCAGCCGGATGGGAAGCGGCGAAAAACTGTTTTTT	peak15	M1_0_F1	0	1474	CD4
TGTGCCAGCTCACCACCGAGTACGACGAACACTGAAGCTTTCTTT	peak15	M1_0_F1	0	1475	CD4
TGTGCCAGCTCACCACCTTCCGTGTACGGAGCCAAAAACATTCAGTACTTC	peak15	M1_0_F1	0	1476	CD4
TGTGCCAGCTCACCAGGACAGGGTGACTATGGCTACACCTTC	peak21	M1_0_F1	0	1478	CD4
TGTGCCAGCTCACCAGGGGATCTAGGTCAGCCCCAGCATTTT	peak5	M1_0_F1	0	1479	CD4
TGTGCCAGCTCACCATACGGAAGGGAGCTGTTTTTT	peak10	M1_0_F1	0	1480	CD4
TGTGCCAGCTCACCATCTTTTAACTACGAGCAGTACGTC	peak5	M1_0_F1	0	1481	CD8
TGTGCCAGCTCACCCCCTGGGACGGCAGCTAACTATGGCTACACCTTC	peak15	M1_0_F1	0	1482	CD4
TGTGCCAGCTCACCCTGGGGACAGGGAACTTCTGGGGCCAACGTCCTGACTTTC	peak15	M1_0_F1	0	1483	CD4
TGTGCCAGCTCACCGGGACAGGCCTACGAGCAGTACTTC	peak15	M1_0_F1	0	1484	CD8
TGTGCCAGCTCACCGGGGGAACTTTACGAGCAGTACTTC	peak15	M1_0_F1	0	1485	CD8
TGTGCCAGCTCACCTCCGGGACTAGCGTCGAATAATGAGCAGTTCTTC	peak15	M1_0_F1	0	1486	CD4
TGTGCCAGCTCACGCTACCAAGAGACCCAGTACTTC	peak15	M1_0_F1	0	1487	CD4
TGTGCCAGCTCACTGACAGGGGCCATCAATGAGCAGTTCTTC	peak15	M1_0_F1	0	1488	CD4
TGTGCCAGCTCACTGGGGCCGGGACCCGTATCGGAAGCTTTCTTT	peak15	M1_0_F1	0	1489	CD8
TGTGCCAGCTCACTTGGACAGGACGAATATGGCTACACCTTC	peak21	M1_0_F1	0	1490	CD4
TGTGCCAGCTCAGCCGGACAGGGGGACTATGGCTACACCTTC	peak15	M1_0_F1	0	1491	CD4
TGTGCCAGCTCATCGGGACAGGCCTACGAGCAGTACTTC	peak21	M1_0_F1	0	1492	CD8
TGTGCCAGCTCCACGAGCCCAGATGGGTATGGCTACACCTTC	peak15	M1_0_F1	0	1493	CD4
TGTGCCAGCTCCCCAGGATCCTATAATTCACCCCTCCACTTT	peak10	M1_0_F1	0	1494	CD4
TGTGCCAGCTCCTTCACTCTAAACAATGAGCAGTTCTTC	peak15	M1_0_F1	0	1495	CD8
TGTGCCAGCTCGAGCGGGGGGGCCTACGAGCAGTACTTC	peak15	M1_0_F1	0	1496	CD8
TGTGCCAGCTCGGCCGGGACGGGGGCCTACGAGCAGTACTTC	peak15	M1_0_F1	0	1497	CD8
TGTGCCAGCTCGGCCGGGCCAGCGGGAACCTACGAGCAGTACGTC	peak15	M1_0_F1	0	1498	CD8
TGTGCCAGCTTAAACCCAGGCTCCTACGAGCAGTACTTC	peak21	M1_0_F1	0	1499	CD8
TGTGCCAGCTTACCGGGACTAGCCTACGAGCAGTACTTC	peak15	M1_0_F1	0	1500	CD8
TGTGCCAGCTTCGGGGGGGCTGGACAGCCCCAGCATTTT	peak21	M1_0_F1	0	1501	CD8
TGTGCCAGGCCGGGACCCAACTATTCCTACGAGCAGTACTTC	peak10	M1_0_F1	0	1502	CD4
TGTGCCAGGGAACGACGGGGCAGACCCCTGCAGCCCCAGCATTTT	peak15	M1_0_F1	0	1503	CD8
TGTGCCAGGGGTAATACGACCGCTGAGCAGTTCTTC	peak10	M1_0_F1	0	1504	CD8
TGTGCCAGTACCGACTTCACAGATACGCAGTATTTT	peak15	M1_0_F1	0	1505	CD8
TGTGCCAGTACGAATTTCGCGGATACGCAGTATTTT	peak15	M1_0_F1	0	1506	CD8
TGTGCCAGTAGACAGGGGCGCGGCTACACCTTC	peak15	M1_0_F1	0	1507	CD8
TGTGCCAGTAGCCCACAGGATTCCAGCAATCAGCCCCAGCATTTT	peak15	M1_0_F1	0	1508	CD8
TGTGCCAGTAGCTACGGAACGCTTCGATTCGGGGAGCTGTTTTTT	peak15	M1_0_F1	0	1509	CD8
TGTGCCAGTAGCTTCGGGGTGAACAATGAGCAGTTCTTC	peak15	M1_0_F1	0	1510	CD8
TGTGCCAGTAGGCAGGGGAACACTGAAGCTTTCTTT	peak15	M1_0_F1	0	1511	CD8
TGTGCCAGTAGTATATTGGGGGGGGATGAGCAGTTCTTC	peak15	M1_0_F1	0	1513	CD8
TGTGCCAGTAGTATCCCCCCCGGGACAGGGGGCGTTGAGCAGTTCTTC	peak15	M1_0_F1	0	1514	CD4
TGTGCCAGTAGTATCGCCGGACAGGATCCCAACGAGCAGTACTTC	peak15	M1_0_F1	0	1515	CD4
TGTGCCAGTAGTATGGGAGGGGGCCCTCTGGAGCAGTTCTTC	peak15	M1_0_F1	0	1516	CD8
TGTGCCAGTAGTATTCCTGCCGGGGGCGCCTATGGCTACACCTTC	peak10	M1_0_F1	0	1517	CD8
TGTGCCAGTAGTATTGTCCGGTCCTTCATCAACGGGGAGCAGTACTTC	peak15	M1_0_F1	0	1518	CD8
TGTGCCAGTAGTATTTCGGCGAACACTGAAGCTTTCTTT	peak15	M1_0_F1	0	1519	CD8
TGTGCCAGTAGTGGAACAGGGTCATCCTACGAGCAGTACTTC	peak21	M1_0_F1	0	1520	CD8
TGTGCCAGTAGTGGCTCGACAGGGTACGAGCAGTACTTC	peak15	M1_0_F1	0	1521	CD8
TGTGCCAGTATGGACAGTGAGACCCAGTACTTC	peak15	M1_0_F1	0	1522	CD4
TGTGCCAGTATGGAGGGGGCCGCGCGTGAGCAGTTCTTC	peak15	M1_0_F1	0	1523	CD4
TGTGCCAGTCGACAGGGTTTTGGCACTGAAGCTTTCTTT	peak21	M1_0_F1	0	1524	CD8
TGTGCCAGTGCCCCGTTCGGGGGGGCGGGCTACACCTTC	peak15	M1_0_F1	0	1525	CD8
TGTGCCAGTGGACAGGGAGCCTACGAGCAGTACTTC	peak15	M1_0_F1	0	1526	CD8
TGTGCCAGTGGGGACAGGGCGATGCCCCAGCATTTT	peak15	M1_0_F1	0	1527	CD8
TGTGCCAGTGGGGCGGGGGGCCCCTACGAGCAGTACTTC	peak15	M1_0_F1	0	1528	CD8
TGTGCCAGTTCGGCGGAACAAGAGACCCAGTACTTC	peak15	M1_0_F1	0	1529	CD4
TGTGCCATCACCAGCGGATCTAGCACAGATACGCAGTATTTT	peak10	M1_0_F1	1.03e-06	1530	CD4
TGTGCCATCACCCAGGATCACGGGGAGCTGTTTTTT	peak15	M1_0_F1	0	1531	CD4
TGTGCCATCAGCACAGGGGACAATGGCAATCAGCCCCAGCATTTT	peak21	M1_0_F1	0	1533	CD4
TGTGCCATCAGTCCCGGGACAGCCAGATCTGGAAACACCATATATTTT	peak10	M1_0_F1	0	1534	CD8
TGTGCCATCAGTGAAGGGGGAAATGAAAAACTGTTTTTT	peak21	M1_0_F1	0	1535	CD8
TGTGCCATCAGTGAAGGTGGGGCCTACGAGCAGTACTTC	peak21	M1_0_F1	0	1536	CD8
TGTGCCATCAGTGAATCCGGGACAGCATACAATGAGCAGTTCTTC	peak15	M1_0_F1	0	1537	CD8
TGTGCCATCAGTGAATGGACACTGGGTGAAGCTTTCTTT	peak21	M1_0_F1	0	1538	CD8
TGTGCCATCAGTGAGGGACAGGGAAGGCCACCCCTCCACTTT	peak15	M1_0_F1	0	1539	CD4
TGTGCCATCAGTGAGGGTAGCGGGATTGCCTACGAGCAGTACTTC	peak15	M1_0_F1	0	1540	CD8
TGTGCCATCAGTGAGGGTTACAACTACGAGCAGTACGTC	peak15	M1_0_F1	0	1541	CD4
TGTGCCATCAGTGAGTCGATTCTTGTAGGTAGTATCTATGGCTACACCTTC	peak15	M1_0_F1	0	1542	CD8
TGTGCCATCAGTGAGTCGCAGATGGGACAGGGACATCAGCCCCAGCATTTT	peak15	M1_0_F1	0	1543	CD4
TGTGCCATCAGTGATGCGGGACAGTCCCACGAGCAGTACTTC	peak15	M1_0_F1	0	1544	CD8
TGTGCCATCAGTGATGGGACTAGTGGTAGCTCCTACAATGAGCAGTTCTTC	peak21	M1_0_F1	0	1545	CD8
TGTGCCATCAGTGCGGGGGAAGGCTACGAGCAGTACTTC	peak21	M1_0_F1	0	1546	CD8
TGTGCCATCAGTGGACAGGGGGCAAATGAAGCTTTCTTT	peak15	M1_0_F1	0	1547	CD4
TGTGCCATCAGTGGGCAGGGCACTGAAGCTTTCTTT	peak15	M1_0_F1	0	1548	CD4
TGTGCCATCAGTGGTAACAGGGGTCGCAATCAGCCCCAGCATTTT	peak15	M1_0_F1	0	1549	CD4
TGTGCCATCAGTGTCCAAGGCACGGACACCGGGGAGCTGTTTTTT	peak21	M1_0_F1	0	1550	CD4
TGTGCCATCAGTGTCGAGGGGACAGGCCTGGGATATGGCTACACCTTC	peak21	M1_0_F1	0	1551	CD8
TGTGCCATCAGTTCCGGCCCGGGACAGGGGATCGGGGAGCTGTTTTTT	peak15	M1_0_F1	0	1552	CD4
TGTGCCATCCATAGCGGGTCACACAATGAGCAGTTCTTC	peak15	M1_0_F1	0	1553	CD8
TGTGCCATCGGGACTAGCGGGGGCTATGAGCAGTTCTTC	peak21	M1_0_F1	0	1554	CD8
TGTGCCATCTCGGGGGGTGGCAATCAGCCCCAGCATTTT	peak15	M1_0_F1	0	1555	CD4
TGTGCCATTTCGCTAGCGGGGGGGAACAATGAGCAGTTCTTC	peak15	M1_0_F1	0	1556	CD8
TGTGCCGTCGACTCTAGCGGGGTCACAGATACGCAGTATTTT	peak21	M1_0_F1	0	1557	CD8
TGTGCCGTGGCGGGACAGGGCTCCTACGAGCAGTACTTC	peak10	M1_0_F1	0	1558	CD8
TGTGCCTATGGACTAGCGGGGGCCCTTGCGGAGACCCAGTACTTC	peak15	M1_0_F1	0	1559	CD8
TGTGCCTCCTCCCCGGGGCCCAACCCCACTGAAGCTTTCTTT	peak15	M1_0_F1	0	1560	CD4
TGTGCCTCGGCGGGCGGATACAATCAGCCCCAGCATTTT	peak15	M1_0_F1	0	1561	CD8
TGTGCCTCTGGGACTAGCGGGGCCTACGAGCAGTACTTC	peak15	M1_0_F1	0	1562	CD8
TGTGCCTGGAACGGGGGGCGGGGACAGCCCCAGCATTTT	peak21	M1_0_F1	0	1563	CD8
TGTGCCTGGACTGTGGAGGGAAAGTAACTCCGGGGAGCTGTTTTTT	peak21	M1_0_F1	0	1564	CD8
TGTGCCTGGAGCACCGGGGCCGCCTACGAGCAGTACTTC	peak15	M1_0_F1	0	1565	CD8
TGTGCCTGGAGTCTAGCGGGGGGGTCGATAGAGACCCAGTACTTC	peak21	M1_0_F1	0	1566	CD8
TGTGCCTGGAGTCTGTCAGGGTTCACTGAAGCTTTCTTT	peak21	M1_0_F1	0	1567	CD8
TGTGCCTGGAGTGCGGGCCTGGCCTACGAGCAGTACTTC	peak21	M1_0_F1	0	1568	CD8
TGTGCCTGGAGTGGCTGGGGGGCGGGTAACACTGAAGCTTTCTTT	peak15	M1_0_F1	0	1569	CD4
TGTGCCTGGAGTGTACGGAGCGGGCAAGAGACCCAGTACTTC	peak5	M1_0_F1	0	1570	CD4
TGTGCCTGGAGTTTTACAGGGGCAACTAATGAAAAACTGTTTTTT	peak15	M1_0_F1	0	1571	CD8
TGTGCCTGGGAAGCAGGACAGGGAACTCAGCCCCAGCATTTT	peak15	M1_0_F1	0	1572	CD8
TGTGCCTGGGGGACAGGGGGCAGGGAGACCCAGTACTTC	peak15	M1_0_F1	0	1573	CD8
TGTGCCTGGGGGCAGTCCTACGAGCAGTACTTC	peak15	M1_0_F1	0	1574	CD8
TGTGCCTGGTTTAGAGGGGGGCCCGGGGAGCTGTTTTTT	peak10	M1_0_F1	0	1575	CD4
TGTGCCTTGGCGACAGTTTACGAGCAGTACTTC	peak21	M1_0_F1	0	1576	CD8
TGTGCTACCACCACAGACTATAATTCACCCCTCCACTTT	peak21	M1_0_F1	0	1577	CD8
TGTGCTAGCAGCTTAAAGGGGCTGAACACTGAAGCTTTCTTT	peak15	M1_0_F1	0	1578	CD8
TGTGCTAGTGGTCTACAGAGCTCCTACGAGCAGTACTTC	peak15	M1_0_F1	0	1579	CD8
TGTGCTAGTGGTTTGGACGGATACGAGCAGTACTTC	peak15	M1_0_F1	0	1580	CD8
TGTGCCAGCAGCCCCGGGACAGGGGGCTACGAGCAGTACTTC	peak15	M1_10_F1	1.06e-05	1	CD8
TGTGCCAGCAGCGCGGACTCTGGGGCCAACGTCCTGACTTTC	peak15	M1_10_F1	4.95e-06	2	CD4
TGTGCCAGCAGCTTAGATGCTGGGGCCAACGTCCTGACTTTC	peak15	M1_10_F1	7.07e-06	3	CD4
TGTGCCAGCAGTCCCGGGACAGCCTACGAGCAGTACTTC	peak15	M1_10_F1	1.13e-05	4	CD8
TGTGCCAGCAGCCCCGACTCTGGGGCCAACGTCCTGACTTTC	peak15	M1_10_F1	1.13e-05	5	CD4
TGTGCCAGCAGCCCCGGGACAGCGAACACTGAAGCTTTCTTT	peak21	M1_10_F1	4.95e-06	6	CD8
TGTGCCAGCAGCCGCGACACAGATACGCAGTATTTT	peak15	M1_10_F1	1.41e-06	7	CD4
TGTGCCAGCAGCGATAACTATGGCTACACCTTC	peak21	M1_10_F1	6.37e-06	8	CD4
TGTGCCAGCAGCGGACAGGGGGCCTACGAGCAGTACTTC	peak15	M1_10_F1	8.49e-05	9	CD8
TGTGCCAGCAGCTTAGTCAACTATGGCTACACCTTC	peak15	M1_10_F1	7.78e-06	10	CD8
TGTGCCAGCAGCTTCGGGACGGTGAACACTGAAGCTTTCTTT	peak15	M1_10_F1	9.2e-06	11	CD4
TGTGCCAGCAGCTTGACAGGGAACAATGAGCAGTTCTTC	peak21	M1_10_F1	2.83e-06	12	CD8
TGTGCCAGCAGTCCGACAGGGGCCTATGGCTACACCTTC	peak15	M1_10_F1	4.95e-06	13	CD8
TGTGCCAGCAGTTACAGGGGAGGCACTGAAGCTTTCTTT	peak15	M1_10_F1	1.49e-05	14	CD8
TGTGCCAGCAGTTTAGGGGGCACTGAAGCTTTCTTT	peak15	M1_10_F1	0	15	CD8
TGTGCCAGCTCACAGGGGGCAGAGACCCAGTACTTC	peak10	M1_10_F1	8.07e-05	16	CD8
TGTGCCATCAGTGACGGCGGACAAGAGACCCAGTACTTC	peak21	M1_10_F1	1.49e-05	17	CD8
TGTGCCATCAGTGAGTCGCAAGAGACCCAGTACTTC	peak15	M1_10_F1	3.54e-06	18	CD4
TGCACCAGCAGCCCTACATCATACTGGAATGAAAAACTGTTTTTT	peak10	M1_10_F1	2.33e-05	19	CD8
TGCAGACGGGGGGGCGCAGATACGCAGTATTTT	peak15	M1_10_F1	0	20	CD8
TGCAGCATATCGGACAGGGGGCTCACCGGGGAGCTGTTTTTT	peak15	M1_10_F1	4.67e-05	21	CD8
TGCAGCGCACCACTAGCGGGGGGGAACAATGAGCAGTTCTTC	peak15	M1_10_F1	7.07e-07	22	CD8
TGCAGCGCACTCGAGGGCTATGGCTACACCTTC	peak15	M1_10_F1	4.95e-06	23	CD8
TGCAGCGCCCCACTAGCGGGGGGAGGGAATGAGCAGTTCTTC	peak15	M1_10_F1	8.56e-05	24	CD8
TGCAGCGCTTCCCCCGCCAGCTACAATGAGCAGTTCTTC	peak10	M1_10_F1	8.42e-05	25	CD4
TGCAGCGGTTGGAAGTCGGGGGAATTCTACGAGCAGTACGTC	peak15	M1_10_F1	0	26	CD4
TGCAGCGTAAACAGGGGGATAGGGAACACTGAAGCTTTCTTT	peak15	M1_10_F1	1.41e-06	27	CD8
TGCAGCGTCACAACAGGGATCAGCTACGAGCAGTACTTC	peak15	M1_10_F1	2.83e-06	28	CD8
TGCAGCGTCACAGCACCAGCTAACTATGGCTACACCTTC	peak10	M1_10_F1	9.9e-06	29	CD4
TGCAGCGTCCCCCTGGGCGGTGGAGCCAATGAGCAGTTCTTC	peak15	M1_10_F1	3.54e-06	30	CD8
TGCAGCGTCCCTCTAAGCGGGGGGGGTAATGAGCAGTTCTTC	peak15	M1_10_F1	0	31	CD8
TGCAGCGTCGGGATGACTAGCGGGGCCGAGGGGACCCAGTACTTC	peak15	M1_10_F1	1.2e-05	32	CD4
TGCAGCGTCTCCCTAAACGCGGGAAACACTGAAGCTTTCTTT	peak15	M1_10_F1	3.54e-06	33	CD4
TGCAGCGTGCAGGACATAGACACAGATACGCAGTATTTT	peak15	M1_10_F1	2.83e-06	34	CD4
TGCAGCGTGGGGGGGACTAGCGGACGGGGTACAGATACGCAGTATTTT	peak21	M1_10_F1	7.78e-06	35	CD8
TGCAGCGTTGAAGATTTTCCCACTGAAGCTTTCTTT	peak10	M1_10_F1	4.03e-05	36	CD8
TGCAGCGTTGAAGCGCACAGGGGCACCGGGGAGCTGTTTTTT	peak10	M1_10_F1	2.76e-05	37	CD4
TGCAGCGTTGACAGGAGGTCTGATGAAGCTTTCTTT	peak15	M1_10_F1	7.07e-07	38	CD8
TGCAGCGTTGGAGAGCCGACCCCTTATGGCTACACCTTC	peak10	M1_10_F1	3.89e-05	40	CD4
TGCAGCGTTGGAGGCGGGGTAAAGTGGGGCTACACCTTC	peak10	M1_10_F1	5.52e-05	41	CD4
TGCAGCGTTGGGGAGGGGGTTGCCTACGAGCAGTACTTC	peak10	M1_10_F1	2.48e-05	42	CD8
TGCAGCGTTGTCGTCTCGAGGGGGGAAGAGACCCAGTACTTC	peak15	M1_10_F1	1.34e-05	43	CD4
TGCAGCGTTTGGGACACAACTAACTATGGCTACACCTTC	peak21	M1_10_F1	0	44	CD4
TGCAGTGAAAAGGGGGGGAGCTCCTACGAGCAGTACGTC	peak15	M1_10_F1	7.07e-07	45	CD8
TGCAGTGCAACGGGGAACCGGGGCACAGATACGCAGTATTTT	peak15	M1_10_F1	4.24e-06	46	CD8
TGCAGTGCAGCGGGCCAGCGGGGGGCAGATACGCAGTATTTT	peak15	M1_10_F1	9.2e-06	47	CD8
TGCAGTGCCAACAGGGGAGCCACTGAAGCTTTCTTT	peak15	M1_10_F1	2.12e-06	49	CD8
TGCAGTGCCCCCCAGGGGACCGGGGGGCACGACACTGAAGCTTTCTTT	peak21	M1_10_F1	0	50	CD4
TGCAGTGCCCCCCGGCGGCAGGATGAGCAGTTCTTC	peak15	M1_10_F1	8.91e-05	51	CD8
TGCAGTGCCCCCGACAGGGAATCGGCGTTAAGGGAGACCCAGTACTTC	peak21	M1_10_F1	1.41e-05	52	CD8
TGCAGTGCCCCCGTGTACAGGGGTGCAGATACGCAGTATTTT	peak15	M1_10_F1	0	53	CD8
TGCAGTGCCCCGACTAGCGGGGGGGACAATGAGCAGTTCTTC	peak10	M1_10_F1	1.91e-05	54	CD8
TGCAGTGCCCCGAGACGGACGGATGAGCAGTTCTTC	peak15	M1_10_F1	1.41e-06	55	CD8
TGCAGTGCCCCGCCCCCGGGAGGACAGAGCTCCTACAATGAGCAGTTCTTC	peak15	M1_10_F1	4.24e-06	56	CD4
TGCAGTGCCCCGCCCGCAACTAGCGGGGGAACAACACAAGAGACCCAGTACTTC	peak15	M1_10_F1	1.34e-05	57	CD4
TGCAGTGCCCCGTCCGGAGGGGGCCTTAATGAGCAGTTCTTC	peak21	M1_10_F1	2.62e-05	58	CD8
TGCAGTGCCCCTCTAGCGGGGGGGGGGAATGAGCAGTTCTTC	peak15	M1_10_F1	1.41e-06	59	CD8
TGCAGTGCCCTAGGAAAGCGGGGCACAGATACGCAGTATTTT	peak15	M1_10_F1	4.24e-06	60	CD8
TGCAGTGCCCTCGGGGGGGAAGCGTACGAGCAGTACTTC	peak15	M1_10_F1	0	61	CD4
TGCAGTGCCGCTATGGGGCAGTACGTC	peak10	M1_10_F1	9.9e-06	62	CD8
TGCAGTGCCGGGACAGCGGCAACTAATGAAAAACTGTTTTTT	peak15	M1_10_F1	4.53e-05	63	CD8
TGCAGTGCCGGGTTGGGCCTCCCCTACGAGCAGTACTTC	peak15	M1_10_F1	2.62e-05	64	CD8
TGCAGTGCCGTCCTTCCGGGACTAGCGGGTTACAATGAGCAGTTCTTC	peak15	M1_10_F1	3.82e-05	65	CD8
TGCAGTGCCTTAGGAGCCCATTTAAATGAAAAACTGTTTTTT	peak15	M1_10_F1	1.2e-05	66	CD8
TGCAGTGCGATGACTAGCTCGTGGCAGACCCAGTACTTC	peak21	M1_10_F1	7.07e-07	67	CD4
TGCAGTGCGCCTGACAGGGGGCTTAGGAGCTACACCTTC	peak21	M1_10_F1	2.83e-06	68	CD4
TGCAGTGCGGCAAGGGGACAGGGGAGCAGCGATGAGCAGTTCTTC	peak15	M1_10_F1	4.95e-06	69	CD4
TGCAGTGCTAAATTATCCTCAGGGATTAGCAATCAGCCCCAGCATTTT	peak15	M1_10_F1	4.95e-06	70	CD4
TGCAGTGCTAACCGGGACCTAGGGGTAAACACCATATATTTT	peak15	M1_10_F1	7.07e-07	71	CD4
TGCAGTGCTACCTCATGGGGGAGCTCCTACAATGAGCAGTTCTTC	peak5	M1_10_F1	7.07e-06	72	CD8
TGCAGTGCTACCTCCCTGGACAGGGAACCTTTATCACTGGGCAATGAGCAGTTCTTC	peak15	M1_10_F1	1.34e-05	73	CD8
TGCAGTGCTACTCGACTAGCGGGGGGGTCTTACAATGAGCAGTTCTTC	peak10	M1_10_F1	1.13e-05	74	CD4
TGCAGTGCTAGAAGCTCCGGGACAGGGGCTGGAAACACCATATATTTT	peak15	M1_10_F1	4.95e-06	75	CD4
TGCAGTGCTAGAGAAGACTTGACAGGGACCTACAATGAGCAGTTCTTC	peak15	M1_10_F1	4.95e-06	77	CD8
TGCAGTGCTAGAGACCGGGACAGGGACTACAATGAGCAGTTCTTC	peak15	M1_10_F1	3.54e-06	78	CD8
TGCAGTGCTAGAGACTTCATCCGCACAGATACGCAGTATTTT	peak15	M1_10_F1	0.00023842	79	CD8
TGCAGTGCTAGAGATGAGGGTTCTAACACCATATATTTT	peak15	M1_10_F1	4.95e-06	81	CD8
TGCAGTGCTAGAGATTACGGCAGAGCCATATATGGCTACACCTTC	peak15	M1_10_F1	0	82	CD4
TGCAGTGCTAGAGCACAGGGGGACTATGGCTACACCTTC	peak15	M1_10_F1	1.41e-06	83	CD4
TGCAGTGCTAGAGGACTAGCGGGGGCCTTAGGCGTTGGCGAGCAGTACTTC	peak21	M1_10_F1	7.07e-07	84	CD8
TGCAGTGCTAGAGGGGGACAGGGGGCTCCAGGGTGGTCCTACAATGAGCAGTTCTTC	peak10	M1_10_F1	1.41e-05	85	CD4
TGCAGTGCTAGATTCGGCGGTGCCACAGATACGCAGTATTTT	peak15	M1_10_F1	1.49e-05	86	CD4
TGCAGTGCTAGCACACAGGGAGCTTACGAGCAGTACGTC	peak15	M1_10_F1	7.07e-07	87	CD8
TGCAGTGCTAGCCAGGCCGCGGCCTACGAGCAGTACTTC	peak15	M1_10_F1	0	88	CD8
TGCAGTGCTAGCCTTAGCGGGGGGGCCGGGGGTGAGCAGTTCTTC	peak15	M1_10_F1	1.27e-05	89	CD8
TGCAGTGCTAGCGGAAGACTAGACGGATCCTACGAGCAGTACTTC	peak15	M1_10_F1	2.12e-06	90	CD8
TGCAGTGCTAGCGTGTGGGGGGGCCCCGGGGAGCTGTTTTTT	peak15	M1_10_F1	4.95e-06	91	CD4
TGCAGTGCTAGGCCCGACAGCAGCTCCTACGAGCAGTACTTC	peak15	M1_10_F1	6.37e-06	92	CD4
TGCAGTGCTAGGGCTAGCGGGGGCCCTGTCCCATACACAGATACGCAGTATTTT	peak10	M1_10_F1	8.7e-05	93	CD4
TGCAGTGCTAGGGCTTGGGGAGGGGGCGGTAGAATAGATGGAAACACCATATATTTT	peak15	M1_10_F1	9.9e-06	94	CD8
TGCAGTGCTAGGGGGGCTAGCACCGGGGGCACCGGGGAGCTGTTTTTT	peak10	M1_10_F1	1.34e-05	95	CD4
TGCAGTGCTAGGGTAGGACAGGGGCCTTCAGATACGCAGTATTTT	peak15	M1_10_F1	9.2e-06	96	CD4
TGCAGTGCTAGGTTCGCACAGGGTACCAATGAGCAGTTCTTC	peak15	M1_10_F1	0	97	CD4
TGCAGTGCTAGTGAAGGGACTAGCGGGGGGGCGTACGAGCAGTACGTC	peak21	M1_10_F1	3.54e-06	98	CD8
TGCAGTGCTAGTGAGGGAACTTCCTACGAGCAGTACTTC	peak15	M1_10_F1	0	99	CD8
TGCAGTGCTATCCTAGCGGGGAATCAAGAGACCCAGTACTTC	peak15	M1_10_F1	1.56e-05	100	CD4
TGCAGTGCTCCACGGACACCAGGGCCAGACAATGAGCAGTTCTTC	peak10	M1_10_F1	1.13e-05	101	CD4
TGCAGTGCTCCAGACAGGCGTAACACCGGGGAGCTGTTTTTT	peak10	M1_10_F1	7.07e-06	102	CD4
TGCAGTGCTCCCACTAGCGGGGGTCACAATGAGCAGTTCTTC	peak15	M1_10_F1	1.7e-05	103	CD8
TGCAGTGCTCCCGGACAGCTCTTGGGGGAGACCCAGTACTTC	peak15	M1_10_F1	2.12e-06	104	CD8
TGCAGTGCTCCCTGGGGCGCGGGGACTGAAGCTTTCTTT	peak21	M1_10_F1	9.9e-06	105	CD8
TGCAGTGCTCCGACTAGCGGGGGGGCTAATGAGCAGTTCTTC	peak21	M1_10_F1	1.41e-06	106	CD8
TGCAGTGCTCCGACTGGCGGGGGGTCCAACGAGCAGTACTTC	peak15	M1_10_F1	0.000146448	107	CD8
TGCAGTGCTGAGAAAGAGTCGTGGAACGAGCAGTTCTTC	peak15	M1_10_F1	8.49e-06	108	CD4
TGCAGTGCTGATACAAATACAGGGGCTAGCAATCAGCCCCAGCATTTT	peak15	M1_10_F1	0	109	CD4
TGCAGTGCTGGGGACAGTGTGAATGAGCAGTTCTTC	peak21	M1_10_F1	3.89e-05	110	CD8
TGCAGTGCTGGGGAGGGCGAGGGCCAGCCCCAGCATTTT	peak10	M1_10_F1	6.93e-05	111	CD8
TGCAGTGCTGGTACAGGGTTCCTTAATTCACCCCTCCACTTT	peak15	M1_10_F1	1.84e-05	112	CD8
TGCAGTGCTGTGCGGGGACAGGGAAGTTCGGATACGCAGTATTTT	peak15	M1_10_F1	0	113	CD4
TGCAGTGCTTATGGACAGGGACCAGAAAAACTGTTTTTT	peak15	M1_10_F1	8.49e-06	114	CD4
TGCAGTGCTTCAGACCGGGACAGGGGAAACTACGAGCAGTACGTC	peak15	M1_10_F1	1.27e-05	115	CD8
TGCAGTGCTTCGATGGAGGCAGCCAGCACTTACGAGCAGTACTTC	peak15	M1_10_F1	1.34e-05	116	CD8
TGCAGTGCTTCTGCCGGGACAGAATCCAGCTCCTACGAGCAGTACTTC	peak15	M1_10_F1	3.54e-06	117	CD8
TGCAGTGGGCAGCCCGAAAGCTCCTACGAGCAGTACTTC	peak10	M1_10_F1	2.62e-05	118	CD8
TGCAGTGTAGCCGGGACCCCAACCTACGAGCAGTACTTC	peak5	M1_10_F1	0	119	CD4
TGCAGTGTCCAGGGGGAGGTCGGGGAGCTGTTTTTT	peak15	M1_10_F1	6.37e-06	120	CD4
TGCAGTGTCCCGACTAGCGGGGGCTACAATGAGCAGTTCTTC	peak15	M1_10_F1	7.07e-07	121	CD8
TGCAGTGTGCGGACAGGGTACAATGAGCAGTTCTTC	peak10	M1_10_F1	1.7e-05	122	CD4
TGCAGTGTTCCGACTAGCGGGGGGGAAAACATTCAGTACTTC	peak15	M1_10_F1	7.07e-07	123	CD8
TGCATTCCTACGGGGGCAGGGATCTCTGGAAACACCATATATTTT	peak15	M1_10_F1	1.06e-05	124	CD8
TGCGCCACTCGGGACAGTGGGAACATTCAGTACTTC	peak15	M1_10_F1	4.95e-06	125	CD4
TGCGCCAGCAACACCGGAGTAGCGGGGGAGGACTACAATGAGCAGTTCTTC	peak10	M1_10_F1	8.49e-06	126	CD4
TGCGCCAGCAACGATCCTAGCGGGGGCAAGACCCAGTACTTC	peak15	M1_10_F1	0	127	CD4
TGCGCCAGCACCGAGTAGGAAGCTTTCTTT	peak15	M1_10_F1	4.24e-06	128	CD8
TGCGCCAGCACTAACCTCGGGACAGGGGCGTTTTACGAGCAGTACTTC	peak15	M1_10_F1	2.83e-06	129	CD4
TGCGCCAGCAGAACGGACAGGGTGAGGTATGGCTACACCTTC	peak21	M1_10_F1	4.24e-06	130	CD8
TGCGCCAGCAGAATGGGACAGGGGGCATCAGATACGCAGTATTTT	peak15	M1_10_F1	0	131	CD4
TGCGCCAGCAGAGGAACAGGCGGACCTCAAGAGACCCAGTACTTC	peak15	M1_10_F1	7.07e-07	132	CD8
TGCGCCAGCAGATCAGGATTCACTGAAGCTTTCTTT	peak15	M1_10_F1	7.07e-06	133	CD8
TGCGCCAGCAGCACATTTAATTCACCCCTCCACTTT	peak21	M1_10_F1	9.2e-06	135	CD8
TGCGCCAGCAGCACCTCCTCGACAGGGGCCTATGGCTACACCTTC	peak21	M1_10_F1	3.04e-05	136	CD8
TGCGCCAGCAGCACGGACGTTGGGGGCGAGCAGTACTTC	peak15	M1_10_F1	5.66e-06	137	CD4
TGCGCCAGCAGCACGGAGGGGTCTGGTGGGGCCAACGTCCTGACTTTC	peak15	M1_10_F1	9.2e-06	138	CD4
TGCGCCAGCAGCACTAGTGGGGAGCTGTTTTTT	peak21	M1_10_F1	5.66e-06	139	CD4
TGCGCCAGCAGCCAAACAACGGCTCCAACCTACGAGCAGTACTTC	peak21	M1_10_F1	5.24e-05	140	CD8
TGCGCCAGCAGCCAAACCCTCTCCTACGAGCAGTACTTC	peak10	M1_10_F1	2.55e-05	141	CD8
TGCGCCAGCAGCCAAACCGAAGGGGGTGCTTATGGCTACACCTTC	peak21	M1_10_F1	1.41e-05	142	CD8
TGCGCCAGCAGCCAAACTCCGGGACAGGGGGCCGATGAGCAGTTCTTC	peak15	M1_10_F1	1.49e-05	143	CD4
TGCGCCAGCAGCCAACCGGGACTCTCCTACAATGAGCAGTTCTTC	peak21	M1_10_F1	9.2e-06	144	CD4
TGCGCCAGCAGCCAACCGTCCACGGACGAGCAGTACTTC	peak15	M1_10_F1	1.91e-05	145	CD8
TGCGCCAGCAGCCAAGAAAGTAACACCGGGGAGCTGTTTTTT	peak5	M1_10_F1	2.12e-06	147	CD4
TGCGCCAGCAGCCAAGAACGGGCCTACGAGCAGTACTTC	peak10	M1_10_F1	3.68e-05	148	CD8
TGCGCCAGCAGCCAAGAACTGACCTACGAGCAGTACTTC	peak15	M1_10_F1	1.84e-05	149	CD8
TGCGCCAGCAGCCAAGACAGGGGAAGGGGCTACACCTTC	peak10	M1_10_F1	1.06e-05	150	CD4
TGCGCCAGCAGCCAAGACCACAGCCTCTCTCCCCAGCATTTT	peak21	M1_10_F1	1.56e-05	151	CD8
TGCGCCAGCAGCCAAGACCCCTCCGACACCGGGGAGCTGTTTTTT	peak15	M1_10_F1	3.54e-06	152	CD8
TGCGCCAGCAGCCAAGACCTGGCGGGGGGGTGGACTGAAGCTTTCTTT	peak15	M1_10_F1	7.07e-07	153	CD4
TGCGCCAGCAGCCAAGACGACAGGGCCAACGTCTATGGCTACACCTTC	peak15	M1_10_F1	0	154	CD4
TGCGCCAGCAGCCAAGACGGGCGGACAGGGGGCGCCTATGGCTACACCTTC	peak10	M1_10_F1	9.9e-06	155	CD8
TGCGCCAGCAGCCAAGACGGGGGGCGCAGGGAGACCCAGTACTTC	peak21	M1_10_F1	0	156	CD8
TGCGCCAGCAGCCAAGACGTAGCTAGCTCCTACAATGAGCAGTTCTTC	peak10	M1_10_F1	7.07e-06	157	CD8
TGCGCCAGCAGCCAAGACTATAGCATCTACCCTCGCGAGCAGTACTTC	peak21	M1_10_F1	2.12e-06	158	CD4
TGCGCCAGCAGCCAAGACTGGATAAATGAGCAGTTCTTC	peak10	M1_10_F1	7.07e-06	159	CD8
TGCGCCAGCAGCCAAGACTGGGTCGAGGGAAACTATGGCTACACCTTC	peak15	M1_10_F1	1.41e-06	160	CD8
TGCGCCAGCAGCCAAGAGCCCGGGACGGGGATTTACAATGAGCAGTTCTTC	peak10	M1_10_F1	3.54e-06	161	CD8
TGCGCCAGCAGCCAAGAGGCAGGGGGTTCTAACTATGGCTACACCTTC	peak21	M1_10_F1	2.12e-06	162	CD8
TGCGCCAGCAGCCAAGAGGGAACAGGCAACTATGGCTACACCTTC	peak21	M1_10_F1	4.95e-06	163	CD8
TGCGCCAGCAGCCAAGAGGTGACGGTAACTTCCTATGGCTACACCTTC	peak15	M1_10_F1	0	164	CD8
TGCGCCAGCAGCCAAGAGGTGCAGGGGAACACCGGGGAGCTGTTTTTT	peak15	M1_10_F1	7.07e-06	165	CD4
TGCGCCAGCAGCCAAGAGTCAAGCACGGTCTACGAGCAGTACTTC	peak21	M1_10_F1	4.24e-06	166	CD8
TGCGCCAGCAGCCAAGAGTCCCCGAGCTCCGGGGAGCTGTTTTTT	peak10	M1_10_F1	1.49e-05	167	CD8
TGCGCCAGCAGCCAAGAGTCGCTGGGTAACTATGGCTACACCTTC	peak21	M1_10_F1	4.95e-06	168	CD8
TGCGCCAGCAGCCAAGATAACAACCCGGGCTATGGCTACACCTTC	peak15	M1_10_F1	1.49e-05	169	CD8
TGCGCCAGCAGCCAAGATACCCCTCAGCCCCAGCATTTT	peak15	M1_10_F1	0	170	CD8
TGCGCCAGCAGCCAAGATACCCGGGAACCCCAGCATTTT	peak15	M1_10_F1	1.2e-05	171	CD4
TGCGCCAGCAGCCAAGATATCATAGTCAACATTCAGTACTTC	peak15	M1_10_F1	0	172	CD4
TGCGCCAGCAGCCAAGATCAAGGCGGACAGGGGGCCTATGGCTACACCTTC	peak15	M1_10_F1	3.54e-06	173	CD8
TGCGCCAGCAGCCAAGATCAGCCCACCAAGCAGTTCTTC	peak15	M1_10_F1	0	174	CD8
TGCGCCAGCAGCCAAGATCCCCGTACAGGGTTAGGCGATAATGAGCAGTTCTTC	peak15	M1_10_F1	0	175	CD8
TGCGCCAGCAGCCAAGATCGGCGGGACCCCTACGAGCAGTACTTC	peak21	M1_10_F1	0	176	CD8
TGCGCCAGCAGCCAAGATCGGGCAGCCTCTGGAAACACCATATATTTT	peak15	M1_10_F1	7.07e-06	177	CD4
TGCGCCAGCAGCCAAGATCTTACAGGGGGCGCGTACGAGCAGTACTTC	peak15	M1_10_F1	1.06e-05	178	CD8
TGCGCCAGCAGCCAAGATGAGCGGTGGTCGGGCTACACCTTC	peak10	M1_10_F1	8.42e-05	179	CD8
TGCGCCAGCAGCCAAGATGTGGGGCAGCCCCAGCATTTT	peak15	M1_10_F1	2.83e-06	180	CD4
TGCGCCAGCAGCCAAGATTCCGGGACAGGGGCTTACGAGCAGTACTTC	peak15	M1_10_F1	9.9e-06	181	CD8
TGCGCCAGCAGCCAAGATTGGGGACAGGGTGACGCTGAAGCTTTCTTT	peak15	M1_10_F1	0	182	CD8
TGCGCCAGCAGCCAAGATTGGTCAGGGGGCCCCTACGAGCAGTACTTC	peak15	M1_10_F1	4.95e-06	183	CD4
TGCGCCAGCAGCCAAGCAACCGGGACAGCTTATGGCTACACCTTC	peak15	M1_10_F1	0	184	CD8
TGCGCCAGCAGCCAAGCCCTTTTACGGGTGAACACTGAAGCTTTCTTT	peak10	M1_10_F1	7.78e-06	185	CD4
TGCGCCAGCAGCCAAGCGACAGCCTACGAGCAGTACGTC	peak15	M1_10_F1	4.39e-05	186	CD8
TGCGCCAGCAGCCAAGCGGACAGGGTTATGAACACTGAAGCTTTCTTT	peak10	M1_10_F1	4.1e-05	187	CD4
TGCGCCAGCAGCCAAGCTTCGCTGGCGGGTAACACCGGGGAGCTGTTTTTT	peak15	M1_10_F1	5.66e-06	188	CD8
TGCGCCAGCAGCCAAGGAGGCTATGGCTACACCTTC	peak15	M1_10_F1	2.12e-06	189	CD8
TGCGCCAGCAGCCAAGGATCCGCAGGGAACCAGCCCCAGCATTTT	peak10	M1_10_F1	0.000171917	190	CD8
TGCGCCAGCAGCCAAGGCGAAACGGCAACCACCGGGGAGCTGTTTTTT	peak10	M1_10_F1	7.22e-05	191	CD8
TGCGCCAGCAGCCAAGGCGGGACAGCGGCATATGGCTACACCTTC	peak10	M1_10_F1	5.66e-06	192	CD8
TGCGCCAGCAGCCAAGGGGAAGCGGGGGGGCTTTACAATGAGCAGTTCTTC	peak21	M1_10_F1	5.66e-06	193	CD8
TGCGCCAGCAGCCAAGGGGGACCGGGACAGGGTCCAGATACGCAGTATTTT	peak21	M1_10_F1	0	194	CD4
TGCGCCAGCAGCCAAGGGGGTATGATGAGTCAGCCCCAGCATTTT	peak21	M1_10_F1	0	195	CD8
TGCGCCAGCAGCCAAGGGTCAGGGGTCGGTAATTCACCCCTCCACTTT	peak15	M1_10_F1	7.78e-06	196	CD8
TGCGCCAGCAGCCAAGGGTCGGACAGGGGGCAGGACGAGCAGTACTTC	peak15	M1_10_F1	1.41e-06	197	CD8
TGCGCCAGCAGCCAAGGTTATGCGAATAGCATCCATGAGCAGTTCTTC	peak10	M1_10_F1	8.49e-06	198	CD4
TGCGCCAGCAGCCAAGTAACAGGGGGAAGCTATGGCTACACCTTC	peak15	M1_10_F1	2.12e-06	199	CD8
TGCGCCAGCAGCCAAGTAACGGAGACAGGGCCGTATGGCTACACCTTC	peak21	M1_10_F1	4.24e-06	200	CD8
TGCGCCAGCAGCCAAGTAAGCACTGAAGCTTTCTTT	peak21	M1_10_F1	1.56e-05	201	CD8
TGCGCCAGCAGCCAAGTCCTCTGGTACAATGAGCAGTTCTTC	peak15	M1_10_F1	1.41e-06	202	CD4
TGCGCCAGCAGCCAAGTGGAAAGTGCGCGAGGAAACATTCAGTACTTC	peak15	M1_10_F1	0	203	CD8
TGCGCCAGCAGCCAAGTTTTCACCAACTCCTACAATGAGCAGTTCTTC	peak15	M1_10_F1	2.62e-05	204	CD8
TGCGCCAGCAGCCACGGGACAGGGGGCAATCAGCCCCAGCATTTT	peak15	M1_10_F1	1.41e-06	205	CD8
TGCGCCAGCAGCCACGGGACGGCCTATGGCTACACCTTC	peak21	M1_10_F1	3.25e-05	206	CD8
TGCGCCAGCAGCCAGACGTGGGCAGGGGCCTTACCCTACGAGCAGTACTTC	peak15	M1_10_F1	3.54e-06	207	CD8
TGCGCCAGCAGCCAGCTAGCTACGAGCTCCTACGAGCAGTACTTC	peak15	M1_10_F1	5.66e-05	208	CD8
TGCGCCAGCAGCCAGCTTTCTAGCGGGGGACCACCGAGGAGGGATACGCAGTATTTT	peak5	M1_10_F1	0	209	CD8
TGCGCCAGCAGCCAGGGACCCGGGACAGGAGCCTACGAGCAGTACTTC	peak15	M1_10_F1	1.41e-06	210	CD8
TGCGCCAGCAGCCAGGGCGGGGCGGGGGGCTCCTACGAGCAGTACTTC	peak21	M1_10_F1	4.24e-06	211	CD8
TGCGCCAGCAGCCAGTTTGTGAGCTCCTACGAGCAGTACTTC	peak15	M1_10_F1	8.49e-06	212	CD8
TGCGCCAGCAGCCATGCCGGGCAGGCGACTTTCTTT	peak15	M1_10_F1	2.12e-06	213	CD8
TGCGCCAGCAGCCATGGGGGTGGAAACACCATATATTTT	peak10	M1_10_F1	9.9e-06	214	CD8
TGCGCCAGCAGCCCAGCGGGGGACTCCTACGAGCAGTACTTC	peak15	M1_10_F1	2.05e-05	215	CD8
TGCGCCAGCAGCCCAGGACAGGGGTCCTACGAGCAGTACTTC	peak15	M1_10_F1	2.48e-05	216	CD8
TGCGCCAGCAGCCCAGTGGCGGGGAGCTCCTACGAGCAGTACTTC	peak10	M1_10_F1	2.33e-05	217	CD8
TGCGCCAGCAGCCCCGACAGTGGACTCACAGATACGCAGTATTTT	peak15	M1_10_F1	1.41e-05	218	CD4
TGCGCCAGCAGCCCCGCGGAGGCCTACGAGCAGTACTTC	peak15	M1_10_F1	0	219	CD8
TGCGCCAGCAGCCCCGGGACAGGAGCGGGCTATGGCTACACCTTC	peak15	M1_10_F1	5.87e-05	220	CD8
TGCGCCAGCAGCCCCTACTCAGGGGGAGGTGAGCAGTTCTTC	peak10	M1_10_F1	0.000141495	221	CD8
TGCGCCAGCAGCCCCTCACAGGCCTACGAGCAGTACTTC	peak15	M1_10_F1	5.02e-05	222	CD8
TGCGCCAGCAGCCCCTCCCGAACGGGGGCCTACGAGCAGTACTTC	peak21	M1_10_F1	7.78e-06	223	CD8
TGCGCCAGCAGCCCCTCTCCAGGGGAGGCCTATGGCTACACCTTC	peak21	M1_10_F1	9.9e-06	224	CD8
TGCGCCAGCAGCCCCTTACAGGGAAGCTCCTACGAGCAGTACTTC	peak21	M1_10_F1	7.07e-06	225	CD4
TGCGCCAGCAGCCCGACAGGGCAAAACGCTGAAGCTTTCTTT	peak15	M1_10_F1	7.07e-06	226	CD4
TGCGCCAGCAGCCCGACGGAGATTAGGGCCTTC	peak15	M1_10_F1	2.83e-06	227	CD8
TGCGCCAGCAGCCCGGAGGCAGATTCAACTAATGAAAAACTGTTTTTT	peak15	M1_10_F1	0	228	CD4
TGCGCCAGCAGCCCGGGACAGACCCTAACTATACAAGAGACCCAGTACTTC	peak15	M1_10_F1	0	229	CD4
TGCGCCAGCAGCCCGTCTATGGCAGCGAGCTACGAGCAGTACTTC	peak21	M1_10_F1	1.41e-06	230	CD8
TGCGCCAGCAGCCCTAGCGGGGGGACCGCCTACGAGCAGTACTTC	peak15	M1_10_F1	2.26e-05	231	CD8
TGCGCCAGCAGCCCTGCGGCTAGCCTCCTTAACACCGGGGAGCTGTTTTTT	peak15	M1_10_F1	3.54e-06	232	CD4
TGCGCCAGCAGCCGACAAGTTGGGATATCGAGCACGCCAGATACGCAGTATTTT	peak15	M1_10_F1	5.66e-06	233	CD4
TGCGCCAGCAGCCGATCGCCCCCGGAACAGGGGGTTGGTCAGCCCCAGCATTTT	peak10	M1_10_F1	1.34e-05	234	CD4
TGCGCCAGCAGCCGATCGGGACAGCCTTACTACAATGAGCAGTTCTTC	peak10	M1_10_F1	2.12e-06	235	CD8
TGCGCCAGCAGCCGCGGGGACCCAGCCTACGAGCAGTACTTC	peak21	M1_10_F1	1.49e-05	236	CD8
TGCGCCAGCAGCCGGAACCCTCGGGACATCTCTGGGGCCAACGTCCTGACTTTC	peak10	M1_10_F1	9.62e-05	237	CD4
TGCGCCAGCAGCCGGCGGACTAGCGGGGGGGATACAGATACGCAGTATTTT	peak10	M1_10_F1	7.5e-05	238	CD4
TGCGCCAGCAGCCGGGGACAGCCGAACACTGAAGCTTTCTTT	peak10	M1_10_F1	7.78e-06	239	CD4
TGCGCCAGCAGCCGGGGAGAGGGTCGGGACAATAGGTCACCCCTCCACTTT	peak15	M1_10_F1	1.84e-05	240	CD8
TGCGCCAGCAGCCGGGGGGGGGGCTACAATGAGCAGTTCTTC	peak15	M1_10_F1	2.12e-05	241	CD8
TGCGCCAGCAGCCTAGGGACAGGGGATGAGCAGTTCTTC	peak15	M1_10_F1	4.1e-05	242	CD8
TGCGCCAGCAGCCTCCTCGAAAACTCTGGAAACACCATATATTTT	peak15	M1_10_F1	6.37e-06	243	CD4
TGCGCCAGCAGCCTGAGATATAGCACAGATACGCAGTATTTT	peak15	M1_10_F1	2.05e-05	244	CD8
TGCGCCAGCAGCCTGGCCGAGCGGGCCGGGGAGCTGTTTTTT	peak21	M1_10_F1	0	245	CD4
TGCGCCAGCAGCCTGGGCGGAGCGCGCACAGATACGCAGTATTTT	peak5	M1_10_F1	5.66e-06	246	CD4
TGCGCCAGCAGCGAGCAGGTCGGGGGGCGATACAATGAGCAGTTCTTC	peak15	M1_10_F1	7.07e-06	247	CD4
TGCGCCAGCAGCGATGGACAGGGAACAGATACGCAGTATTTT	peak15	M1_10_F1	2.12e-06	248	CD4
TGCGCCAGCAGCGCCCGAGGAGGCGGGAACACAGATACGCAGTATTTT	peak15	M1_10_F1	9.9e-06	249	CD4
TGCGCCAGCAGCGGGCCCGACTCTGGAAACACCATATATTTT	peak15	M1_10_F1	6.37e-06	251	CD4
TGCGCCAGCAGCGGGGCGGGGGGGTACGAGCAGTACTTC	peak15	M1_10_F1	9.2e-06	252	CD8
TGCGCCAGCAGCGTAGTAGGGGGTTTTGAGCAGTTCTTC	peak15	M1_10_F1	7.07e-06	253	CD4
TGCGCCAGCAGCTACCAAAGGACAGGCGGTGAAGCTTTCTTT	peak15	M1_10_F1	1.41e-06	254	CD4
TGCGCCAGCAGCTCAACTTACACCGGGGAGCTGTTTTTT	peak21	M1_10_F1	2.83e-06	255	CD4
TGCGCCAGCAGCTCCCCTAGCGGGGGTAATGAGCAGTTCTTC	peak15	M1_10_F1	0	257	CD4
TGCGCCAGCAGCTCCCGGATATCGACGCCGCCAGATACGCAGTATTTT	peak10	M1_10_F1	1.41e-05	258	CD4
TGCGCCAGCAGCTCCGCGGAGGCCTACGAGCAGTACTTC	peak21	M1_10_F1	0	259	CD8
TGCGCCAGCAGCTCGCAATTTTCAGTCGGGACAGGGCAAAACATTCAGTACTTC	peak15	M1_10_F1	1.41e-06	260	CD4
TGCGCCAGCAGCTCGGACGTGGGAGGTGAGCAGTTCTTC	peak15	M1_10_F1	7.07e-06	262	CD4
TGCGCCAGCAGCTCGGGGCAGGGAACCTATGGCTACACCTTC	peak10	M1_10_F1	1.98e-05	263	CD4
TGCGCCAGCAGCTCGGGTGGACAGGGGGCAGACTATGGCTACACCTTC	peak21	M1_10_F1	0	264	CD8
TGCGCCAGCAGCTGGACTGACAGCGCACCTTTCTACGAGCAGTACTTC	peak15	M1_10_F1	7.07e-07	265	CD8
TGCGCCAGCAGCTTAAACCTCCTCTCGTCCAATGAGCAGTTCTTC	peak15	M1_10_F1	4.95e-06	266	CD4
TGCGCCAGCAGCTTACAGGGCGATGAGCAGTTCTTC	peak15	M1_10_F1	3.54e-06	267	CD4
TGCGCCAGCAGCTTACTAGGGGGGATTCAAGAGACCCAGTACTTC	peak15	M1_10_F1	3.54e-06	268	CD4
TGCGCCAGCAGCTTATACGTGTCGGCAGATACGCAGTATTTT	peak10	M1_10_F1	6.37e-06	269	CD4
TGCGCCAGCAGCTTCCAGGGGTCTGAAGCTTTCTTT	peak15	M1_10_F1	1.41e-06	270	CD4
TGCGCCAGCAGCTTCGACTCTACCGGGGAGCTGTTTTTT	peak15	M1_10_F1	7.07e-07	271	CD8
TGCGCCAGCAGCTTCGGACAGGACCCAGATACGCAGTATTTT	peak15	M1_10_F1	3.54e-06	272	CD4
TGCGCCAGCAGCTTCTCGACAGGAACCTACGAGCAGTACTTC	peak15	M1_10_F1	9.2e-06	273	CD4
TGCGCCAGCAGCTTGATGTCAGGAGAAAATGAGCAGTTCTTC	peak15	M1_10_F1	1.41e-06	274	CD4
TGCGCCAGCAGCTTGCTATCTGGACAGAGCTCCTACAATGAGCAGTTCTTC	peak15	M1_10_F1	7.07e-07	275	CD4
TGCGCCAGCAGCTTGGAACAGGGCTATGGCTACACCTTC	peak15	M1_10_F1	2.83e-06	276	CD4
TGCGCCAGCAGCTTGGAACCCGATCAGCCCCAGCATTTT	peak15	M1_10_F1	0	277	CD4
TGCGCCAGCAGCTTGGAAGGGTCGGGTGGGGCCAACGTCCTGACTTTC	peak15	M1_10_F1	2.83e-06	278	CD4
TGCGCCAGCAGCTTGGAATACGTAGGGAATTCACCCCTCCACTTT	peak15	M1_10_F1	2.83e-06	279	CD4
TGCGCCAGCAGCTTGGAATGGGGAACTGGAAACACCATATATTTT	peak21	M1_10_F1	6.37e-06	280	CD4
TGCGCCAGCAGCTTGGACCCAAACGACTATGGCTACACCTTC	peak10	M1_10_F1	1.41e-05	281	CD4
TGCGCCAGCAGCTTGGACCCCCCAGATGCAGGAAACACCATATATTTT	peak15	M1_10_F1	4.24e-06	282	CD4
TGCGCCAGCAGCTTGGACGAAGCCTACGAGCAGTACTTC	peak15	M1_10_F1	0.000123809	283	CD8
TGCGCCAGCAGCTTGGACGGAGACCCACTACGGGAGCAGTACGTC	peak15	M1_10_F1	2.26e-05	284	CD4
TGCGCCAGCAGCTTGGAGAGCACAGATACGCAGTATTTT	peak10	M1_10_F1	1.49e-05	285	CD4
TGCGCCAGCAGCTTGGAGAGGATGGATCAGCCCCAGCATTTT	peak15	M1_10_F1	1.34e-05	286	CD4
TGCGCCAGCAGCTTGGAGGCGAGAATCACCTACAATGAGCAGTTCTTC	peak15	M1_10_F1	8.49e-06	287	CD4
TGCGCCAGCAGCTTGGAGGGGCTGATCTATGGCTACACCTTC	peak10	M1_10_F1	6.37e-06	288	CD4
TGCGCCAGCAGCTTGGCCAGGGCAAACACCGGGGAGCTGTTTTTT	peak10	M1_10_F1	2.69e-05	289	CD4
TGCGCCAGCAGCTTGGCCCCAGGGCCCTACGAGCAGTACTTC	peak21	M1_10_F1	8.49e-06	290	CD4
TGCGCCAGCAGCTTGGCCGAGGCTTACGAGCAGTACTTC	peak15	M1_10_F1	2.12e-06	291	CD8
TGCGCCAGCAGCTTGGCCGGCGGGGGCGGAGAGACCCAGTACTTC	peak10	M1_10_F1	4.95e-06	292	CD4
TGCGCCAGCAGCTTGGCCTGGGGAAATCCCACAGATACGCAGTATTTT	peak10	M1_10_F1	2.05e-05	293	CD4
TGCGCCAGCAGCTTGGCGGACAGGGGGCGTGAAGCTTTCTTT	peak21	M1_10_F1	7.78e-06	294	CD4
TGCGCCAGCAGCTTGGCGTACCTGAACACTGAAGCTTTCTTT	peak15	M1_10_F1	7.07e-07	295	CD8
TGCGCCAGCAGCTTGGGAAACGGAGGCGAGCAGTACTTC	peak10	M1_10_F1	2.05e-05	296	CD4
TGCGCCAGCAGCTTGGGGACAGGTGGCAATCAGCCCCAGCATTTT	peak21	M1_10_F1	1.49e-05	297	CD8
TGCGCCAGCAGCTTGGGGGACAGCGTAGATCAGCCCCAGCATTTT	peak15	M1_10_F1	0	298	CD4
TGCGCCAGCAGCTTGGGGGACAGTTTAAGGCCCCTCCACTTT	peak10	M1_10_F1	7.5e-05	299	CD4
TGCGCCAGCAGCTTGGGGGGGGGGCGCAATGAGCAGTTCTTC	peak15	M1_10_F1	1.06e-05	300	CD4
TGCGCCAGCAGCTTGGTAAGAGGGGCCAACGTCCTGACTTTC	peak10	M1_10_F1	1.56e-05	301	CD4
TGCGCCAGCAGCTTGGTGGTGGGGGCCAACAATGAGCAGTTCTTC	peak15	M1_10_F1	2.83e-06	302	CD4
TGCGCCAGCAGCTTTCAGGGGGGCACTGAAGCTTTCTTT	peak21	M1_10_F1	0	303	CD8
TGCGCCAGCAGCTTTCTCGGGGTCGATGGGGAGACCCAGTACTTC	peak10	M1_10_F1	1.34e-05	304	CD4
TGCGCCAGCAGCTTTGTCAGGCTCCAAGGAAACACTGAAGCTTTCTTT	peak15	M1_10_F1	1.34e-05	305	CD8
TGCGCCAGCAGCTTTTCCGGGACAGGGAACAATGAGCAGTTCTTC	peak15	M1_10_F1	8.7e-05	306	CD8
TGCGCCAGCAGGAATCCCCGGAGCTCCTACGAGCAGTACTTC	peak15	M1_10_F1	4.95e-06	307	CD8
TGCGCCAGCAGGCAGGGACAGGGGGGCTACACCTTC	peak15	M1_10_F1	0	308	CD8
TGCGCCAGCAGGGAAGGGACTAGCGGGGGGCAAAATACGCAGTATTTT	peak15	M1_10_F1	0	309	CD4
TGCGCCAGCAGGGACATGAATTACGAGCAGTACTTC	peak15	M1_10_F1	0	310	CD4
TGCGCCAGCAGGGCGGAGCTATCTATGAACACTGAAGCTTTCTTT	peak21	M1_10_F1	7.07e-07	311	CD4
TGCGCCAGCAGGTCCGGGACAACGAACTATGGCTACACCTTC	peak15	M1_10_F1	1.27e-05	312	CD8
TGCGCCAGCAGTAACCTAGCGGGGGGGGAAGAGACCCAGTACTTC	peak21	M1_10_F1	3.54e-06	313	CD4
TGCGCCAGCAGTCAACCAGGACAGGGGCCCCCTACGAGCAGTACTTC	peak15	M1_10_F1	2.83e-06	314	CD8
TGCGCCAGCAGTCAAGAGGCAGCCAGCTCCTATAATTCACCCCTCCACTTT	peak21	M1_10_F1	0	315	CD8
TGCGCCAGCAGTCAATCCCCGTGGTCCAGGGGGGTATAGCTGTTTTTT	peak21	M1_10_F1	1.06e-05	316	CD8
TGCGCCAGCAGTCCCTAGGGAGGAGGGCCTGAGAGCAGTACTTC	peak15	M1_10_F1	3.54e-06	317	CD8
TGCGCCAGCAGTCTCTTAGCACAGATACGCAGTATTTT	peak21	M1_10_F1	7.07e-06	318	CD8
TGCGCCAGCAGTCTTGAGGTAGGCACTGAAGCTTTCTTT	peak15	M1_10_F1	7.78e-06	319	CD8
TGCGCCAGCAGTGAGATCCGAGGGACAGGGTCCCACGAGCAGTACTTC	peak10	M1_10_F1	2.26e-05	320	CD8
TGCGCCAGCAGTGAGGAGGAGGTAGCCTACGAGCAGTACTTC	peak15	M1_10_F1	0	321	CD8
TGCGCCAGCAGTGAGGGAAGGACAGGGGACTACAATGAGCAGTTCTTC	peak21	M1_10_F1	0	322	CD4
TGCGCCAGCAGTGAGTCGGGGACTAGCGAATACAATGAGCAGTTCTTC	peak15	M1_10_F1	1.27e-05	323	CD4
TGCGCCAGCAGTGCTACGGGTGCCTACGAGCAGTACTTC	peak15	M1_10_F1	0	324	CD8
TGCGCCAGCAGTGTTGAGCGGGAAACTTACGAGCAGTACTTC	peak15	M1_10_F1	1.41e-06	325	CD8
TGCGCCAGCAGTTAACAGGGGGCAATCGGGGAGCTGTTTTTT	peak10	M1_10_F1	1.41e-05	326	CD8
TGCGCCAGCCGACGGACAGCAGGAGCCCACAGCCCCAGCATTTT	peak21	M1_10_F1	2.83e-06	327	CD8
TGCGCCAGCCGGCGGGAGGGAACGATGAACACTGAAGCTTTCTTT	peak15	M1_10_F1	4.95e-06	328	CD4
TGCGCCAGCCGGGACGGAGCCTACGAGCAGTACTTC	peak15	M1_10_F1	9.2e-06	329	CD4
TGCGCCAGCCGGGGAGGGGGACAGGGGATACAGAACTATGGCTACACCTTC	peak15	M1_10_F1	1.84e-05	330	CD8
TGCGCCAGCCTTGGCGAGGGGAGAAGCACCGGGGAGCTGTTTTTT	peak15	M1_10_F1	1.13e-05	331	CD8
TGCGCCAGCGGGGTCGGAACCTACAATGAGCAGTTCTTC	peak15	M1_10_F1	2.26e-05	332	CD4
TGCGCCAGCTCCCCATGGCGGGGGGCCTACAATGAGCAGTTCTTC	peak21	M1_10_F1	2.26e-05	333	CD8
TGCGCCAGCTTAGGTCCGAATAATTCACCCCTCCACTTT	peak15	M1_10_F1	0	334	CD8
TGCTCCCAGGGGGACAGGGGTCTTAACACTGAAGCTTTCTTT	peak21	M1_10_F1	9.9e-06	335	CD8
TGTGCCAACTAGCACCCGGGGCTCATCTTCAATCAGCCCCAGCATTTT	peak21	M1_10_F1	0	336	CD4
TGTGCCAATACGGGACTGAACACCGGGGAGCTGTTTTTT	peak15	M1_10_F1	7.07e-07	337	CD8
TGTGCCACACTATCCGGGACAACGAACACCGGGGAGCTGTTTTTT	peak10	M1_10_F1	7.78e-06	338	CD4
TGTGCCACAGGCCGGTCCTCGACCTACGAGCAGTACTTC	peak15	M1_10_F1	0	339	CD8
TGTGCCACCAAACCGGGCCCCGGTTCGCCCCAGCATTTT	peak15	M1_10_F1	1.41e-06	340	CD4
TGTGCCACCACGGAGGGGGGGGCCTACGAGCAGTACTTC	peak15	M1_10_F1	1.2e-05	341	CD8
TGTGCCACCACTAACCGACCCTCTGGGGCCAACGTCCTGACTTTC	peak15	M1_10_F1	0	342	CD8
TGTGCCACCAGCACCCGGGCCGCCGGCGAGCAGTACTTC	peak15	M1_10_F1	0	343	CD8
TGTGCCACCAGCACCGCAACAGGGGGATACGAGCAGTACTTC	peak15	M1_10_F1	3.54e-06	344	CD8
TGTGCCACCAGCACCGCCGAGAACTATGGCTACACCTTC	peak15	M1_10_F1	5.66e-05	345	CD8
TGTGCCACCAGCACGGGCTTGGCCTACGAGCAGTACGTC	peak21	M1_10_F1	2.62e-05	346	CD8
TGTGCCACCAGCAGAACCGACAGGATCCTCATCGAGCAGTACTTC	peak15	M1_10_F1	9.9e-06	347	CD8
TGTGCCACCAGCAGACAGGCGAATACAGATACGCAGTATTTT	peak10	M1_10_F1	0.000183237	348	CD8
TGTGCCACCAGCAGAGAGGAAAGGAGGGCTAATGAAAAACTGTTTTTT	peak21	M1_10_F1	0	349	CD8
TGTGCCACCAGCAGAGAGGTCGCGGGTTACAATGAGCAGTTCTTC	peak15	M1_10_F1	0	350	CD4
TGTGCCACCAGCAGAGATCAAGAGGGAGCCAATCAGCCCCAGCATTTT	peak21	M1_10_F1	2.83e-05	351	CD8
TGTGCCACCAGCAGAGATCGACCAGGCCAGCCCCAGCATTTT	peak21	M1_10_F1	1.2e-05	352	CD8
TGTGCCACCAGCAGAGATCTCCCGACAGGACGACAAGAGACCCAGTACTTC	peak21	M1_10_F1	5.66e-06	353	CD8
TGTGCCACCAGCAGAGATGCGGACGGGCCCAGATCACCCCTCCACTTT	peak10	M1_10_F1	1.06e-05	354	CD4
TGTGCCACCAGCAGAGATTCCCCCATACTCAGCATTCAGTACTTC	peak15	M1_10_F1	0	355	CD4
TGTGCCACCAGCAGAGATTGGCTAGCGGGGGGGCAAGAGACCCAGTACTTC	peak15	M1_10_F1	3.68e-05	356	CD8
TGTGCCACCAGCAGAGCCCCACTAGCGGGGGGTAATGAGCAGTTCTTC	peak15	M1_10_F1	7.07e-07	357	CD8
TGTGCCACCAGCAGAGCCCCAGGGTACGAGCAGTACGTC	peak21	M1_10_F1	2.12e-05	358	CD8
TGTGCCACCAGCAGAGCCCCCCTAGCGGGGGGCAATGAGCAGTTCTTC	peak21	M1_10_F1	1.27e-05	359	CD8
TGTGCCACCAGCAGAGCCGGGGCCTACGAGCAGTACTTC	peak15	M1_10_F1	1.34e-05	360	CD8
TGTGCCACCAGCAGAGCGACAGGGGCTCAGCCCCAGCATTTT	peak21	M1_10_F1	8.49e-06	361	CD8
TGTGCCACCAGCAGAGCGACGGGCGCTGAAGCTTTCTTT	peak15	M1_10_F1	4.95e-06	362	CD8
TGTGCCACCAGCAGAGCGAGCCTCACAGATACGCAGTATTTT	peak5	M1_10_F1	0	363	CD8
TGTGCCACCAGCAGAGCGGACCCTGCCTACGAGCAGTACTTC	peak15	M1_10_F1	4.95e-06	364	CD8
TGTGCCACCAGCAGAGCGGCAGGTTCCTACGAGCAGTACTTC	peak21	M1_10_F1	1.41e-06	365	CD8
TGTGCCACCAGCAGAGCGGTAGCGGGGGGCAATGAGCAGTTCTTC	peak15	M1_10_F1	3.54e-06	366	CD4
TGTGCCACCAGCAGAGCTATGAACACTGAAGCTTTCTTT	peak21	M1_10_F1	1.41e-05	367	CD8
TGTGCCACCAGCAGAGGACAGAGAACCTACGAGCAGTACTTC	peak15	M1_10_F1	1.06e-05	368	CD8
TGTGCCACCAGCAGAGGACAGCTCTACGAGCAGTACTTC	peak15	M1_10_F1	4.24e-06	369	CD8
TGTGCCACCAGCAGAGGACAGGCCTACGAGCAGTACGTC	peak21	M1_10_F1	2.12e-06	370	CD8
TGTGCCACCAGCAGAGGACAGGCGGGCGGTAATTCACCCCTCCACTTT	peak15	M1_10_F1	2.83e-06	371	CD8
TGTGCCACCAGCAGAGGACAGGGGCGGACCTACGAGCAGTACTTC	peak10	M1_10_F1	2.12e-05	372	CD8
TGTGCCACCAGCAGAGGACAGGGGTACGAGCAGTACTTC	peak10	M1_10_F1	2.12e-06	373	CD8
TGTGCCACCAGCAGAGGACAGGGTTACGAGCAGTACGTC	peak15	M1_10_F1	4.95e-06	374	CD8
TGTGCCACCAGCAGAGGACAGGTCTCCTACAATGAGCAGTTCTTC	peak15	M1_10_F1	7.78e-06	375	CD8
TGTGCCACCAGCAGAGGACTAGTTGGTTCCTACAATGAGCAGTTCTTC	peak21	M1_10_F1	1.63e-05	376	CD8
TGTGCCACCAGCAGAGGAGAAAACACTGAAGCTTTCTTT	peak21	M1_10_F1	5.66e-06	377	CD8
TGTGCCACCAGCAGAGGAGGAGGGTACGAGCAGTACTTC	peak21	M1_10_F1	3.54e-06	378	CD8
TGTGCCACCAGCAGAGGCAAGGGCTCCTACAATGAGCAGTTCTTC	peak21	M1_10_F1	7.78e-06	379	CD8
TGTGCCACCAGCAGAGGCCAGAGACTCTACGAGCAGTACTTC	peak15	M1_10_F1	1.98e-05	380	CD8
TGTGCCACCAGCAGAGGCCGGAGCTCCTACAATGAGCAGTTCTTC	peak15	M1_10_F1	1.77e-05	381	CD8
TGTGCCACCAGCAGAGGGATTTCCTACGAGCAGTACGTC	peak15	M1_10_F1	3.25e-05	382	CD8
TGTGCCACCAGCAGAGGGGAATCCTACGAGCAGTACTTC	peak15	M1_10_F1	4.24e-06	383	CD8
TGTGCCACCAGCAGAGGGGCAGCTTATAGCAATCAGCCCCAGCATTTT	peak10	M1_10_F1	9.2e-06	384	CD8
TGTGCCACCAGCAGAGGGGGGGCCTACGAGCAGTACTTC	peak15	M1_10_F1	1.98e-05	385	CD8
TGTGCCACCAGCAGAGGGTCCGGGACAGGGGCCTACGAGCAGTACTTC	peak15	M1_10_F1	2.05e-05	386	CD8
TGTGCCACCAGCAGAGGTCAACAGCCGTTGGACTATGGCTACACCTTC	peak21	M1_10_F1	6.37e-06	387	CD8
TGTGCCACCAGCAGAGTAGCCTACGCGTCTCAAGAGACCCAGTACTTC	peak15	M1_10_F1	4.95e-06	388	CD8
TGTGCCACCAGCAGAGTCGAACTTCGCCAAGGGTCCCAGTACTTC	peak21	M1_10_F1	0.000209413	389	CD8
TGTGCCACCAGCAGATCCCCAGGGCTCGAGCAGTACGTC	peak15	M1_10_F1	0	390	CD8
TGTGCCACCAGCAGATCGCTTGGCTACGAGCAGTACTTC	peak15	M1_10_F1	0	391	CD8
TGTGCCACCAGCAGCGGACAGAGGAATTACAATGAGCAGTTCTTC	peak21	M1_10_F1	7.78e-06	392	CD8
TGTGCCACCAGCAGCGGGACAGGACCCTACGAGCAGTACGTC	peak10	M1_10_F1	1.7e-05	393	CD8
TGTGCCACCAGCAGCGGGACAGGTCCCTACGAGCAGTACTTC	peak21	M1_10_F1	5.66e-06	394	CD8
TGTGCCACCAGCAGCGGGACCGCATACGAGCAGTACGTC	peak21	M1_10_F1	0	395	CD8
TGTGCCACCAGCAGGACAGGAGGGCATGAGCAGTTCTTC	peak10	M1_10_F1	1.2e-05	396	CD8
TGTGCCACCAGCAGGGGACTAGCCTACAATGAGCAGTTCTTC	peak15	M1_10_F1	1.7e-05	397	CD8
TGTGCCACCAGCAGGGGACTAGCGGGGGCCTACAATGAGCAGTTCTTC	peak15	M1_10_F1	2.83e-06	398	CD8
TGTGCCACCAGCAGGGGCGGAGGGTACGAGCAGTACTTC	peak15	M1_10_F1	0	399	CD8
TGTGCCACCAGCAGGGGGATTTCGGGGCCATACAATGAGCAGTTCTTC	peak15	M1_10_F1	1.2e-05	400	CD8
TGTGCCACCAGCAGGGGTCTTAGCTCCTACAATGAGCAGTTCTTC	peak21	M1_10_F1	1.27e-05	401	CD8
TGTGCCACCAGCAGGGGTGGACAGGGTGGTAATTCACCCCTCCACTTT	peak21	M1_10_F1	7.78e-06	402	CD8
TGTGCCACCAGCAGGTCAGGGGGCACTGAAGCTTTCTTT	peak15	M1_10_F1	3.54e-06	403	CD8
TGTGCCACCAGCAGGTCCAAAGCCTACGAGCAGTACTTC	peak15	M1_10_F1	4.95e-06	404	CD8
TGTGCCACCAGCAGGTTAGCGGGGGAACAAGAGACCCAGTACTTC	peak21	M1_10_F1	4.95e-06	405	CD8
TGTGCCACCAGCAGTAAACTTACGATTACGGAGCAGTTCTTC	peak10	M1_10_F1	4.1e-05	406	CD8
TGTGCCACCAGCAGTGCTCCGGGGCCTTACGAGCAGTACTTC	peak15	M1_10_F1	0	407	CD8
TGTGCCACCAGCAGTGGGACAGCCTACGAGCAGTACTTC	peak15	M1_10_F1	8.49e-06	408	CD8
TGTGCCACCAGCATCCTGGAAATAGGGTCAGATACGCAGTATTTT	peak15	M1_10_F1	1.41e-06	409	CD8
TGTGCCACCAGCATGGCGAGCAATCAGCCCCAGCATTTT	peak21	M1_10_F1	0	410	CD8
TGTGCCACCAGCCAGGGGGGGGCCTACGAGCAGTACTTC	peak21	M1_10_F1	1.06e-05	411	CD8
TGTGCCACCAGCCCCGACAGGGGGCCTTACGAGCAGTACTTC	peak15	M1_10_F1	0	412	CD8
TGTGCCACCAGCCCCTCAGCAGGGGGCTATGGCTACACCTTC	peak21	M1_10_F1	4.24e-06	413	CD8
TGTGCCACCAGCCGAGGACAGAGCGGCTACAATGAGCAGTTCTTC	peak15	M1_10_F1	2.12e-06	414	CD8
TGTGCCACCAGCCGCGCAGGGGCCTACGAGCAGTACGTC	peak21	M1_10_F1	7.07e-06	415	CD8
TGTGCCACCAGCCGCGGGGACGGTACCTACGAGCAGTACGTC	peak21	M1_10_F1	5.52e-05	416	CD8
TGTGCCACCAGCCGTGGTGTAGGGTTTTACGAGCAGTACGTC	peak10	M1_10_F1	9.9e-06	417	CD8
TGTGCCACCAGCGCCAGCACAGGGCTTGAGCAGTTCTTC	peak21	M1_10_F1	0.000110366	418	CD8
TGTGCCACCAGCGCCCAACAGGGAGCCGGGGAGCTGTTTTTT	peak21	M1_10_F1	2.48e-05	419	CD8
TGTGCCACCAGCGCTGGGCCGGAGATGTACGAGCAGTACTTC	peak21	M1_10_F1	0.000326854	420	CD8
TGTGCCACCAGCGGACGGCCAGCCGACGAGCAGTACTTC	peak15	M1_10_F1	0	421	CD8
TGTGCCACCAGCGGAGGGGGCGGGTACGAGCAGTACGTC	peak21	M1_10_F1	9.9e-06	422	CD8
TGTGCCACCAGCGGAGGGGTGGGTTACGAGCAGTACGTC	peak15	M1_10_F1	2.9e-05	423	CD8
TGTGCCACCAGCGGATCTACAGGTCAGCCCCAGCATTTT	peak15	M1_10_F1	5.66e-06	424	CD8
TGTGCCACCAGCGGGGCCACTGGGGGATATGAGCAGTTCTTC	peak15	M1_10_F1	4.24e-06	425	CD8
TGTGCCACCAGCGGGTCCGGCAACTACGAGCAGTACTTC	peak21	M1_10_F1	9.76e-05	426	CD8
TGTGCCACCAGCGTGACAGGGGGGAATTCACCCCTCCACTTT	peak21	M1_10_F1	4.95e-06	427	CD8
TGTGCCACCAGCTCCCGGGCAATGCCTGCCCTAGATACGCAGTATTTT	peak10	M1_10_F1	2.33e-05	428	CD8
TGTGCCACCAGTCCTGGTACGGCCTACGAGCAGTACTTC	peak21	M1_10_F1	0.000102584	429	CD8
TGTGCCACCAGTCGGGGAGCAGATACGCAGTATTTT	peak10	M1_10_F1	2.55e-05	430	CD8
TGTGCCACCAGTGACAGCCAACTAGCGGGGGGCCACAATGAGCAGTTCTTC	peak10	M1_10_F1	4.74e-05	431	CD8
TGTGCCACCAGTGAGCCCGGGACAGCAGATACGCAGTATTTT	peak10	M1_10_F1	4.32e-05	432	CD8
TGTGCCACCAGTGATCCGGGACAGGGTGAGAATGAGCAGTTCTTC	peak5	M1_10_F1	7.07e-07	433	CD4
TGTGCCACCAGTGATTTCACTAGCACAGATACGCAGTATTTT	peak5	M1_10_F1	9.2e-06	434	CD8
TGTGCCACCAGTGGCCCCGACGAGGCTTCACCCCTCCACTTT	peak15	M1_10_F1	1.41e-06	435	CD8
TGTGCCACCAGTTATGAGAGGAACACTGAAGCTTTCTTT	peak21	M1_10_F1	7.07e-06	436	CD8
TGTGCCACCAGTTCCGGGGGGGCCCCCTACAATGAGCAGTTCTTC	peak15	M1_10_F1	0	437	CD8
TGTGCCACCCAGGGGGCAGCCGGGGAGCTGTTTTTT	peak15	M1_10_F1	0	438	CD8
TGTGCCACCCCGACCGATACGCAGTATTTT	peak21	M1_10_F1	3.54e-06	439	CD8
TGTGCCACCCTAGCGGGGGGCAGCTACGAGCAGTACTTC	peak15	M1_10_F1	1.41e-06	440	CD8
TGTGCCACCGACCCGTGGAACACCGGGGAGCTGTTTTTT	peak10	M1_10_F1	1.34e-05	441	CD4
TGTGCCACCGCCCCGGGACAGGGTGTTTTTCATGAGCAGTTCTTC	peak15	M1_10_F1	0	442	CD8
TGTGCCACCGCGATGGGGGCGGCTAACAATGAGCAGTTCTTC	peak15	M1_10_F1	0	443	CD8
TGTGCCACCGGAGTCAGTGCGAAACCAGATACGCAGTATTTT	peak21	M1_10_F1	9.2e-06	444	CD8
TGTGCCACCTCAGGGGCGGGTAATCAGCCCCAGCATTTT	peak15	M1_10_F1	4.24e-06	445	CD4
TGTGCCACCTCAGGGGGTGGCAATCAGCCCCAGCATTTT	peak21	M1_10_F1	0	446	CD4
TGTGCCACCTCTGGGGCCGCGTCCTACGAGCAGTACTTC	peak21	M1_10_F1	5.66e-06	447	CD8
TGTGCCACCTTCCCGCCGGAGTCTATCACAGATACGCAGTATTTT	peak15	M1_10_F1	1.91e-05	448	CD4
TGTGCCACGAGCGCCTCTACAGCCGATGAGCAGTTCTTC	peak21	M1_10_F1	3.54e-06	449	CD8
TGTGCCACTGGGATGTGGGGGAATGAGCAGTTCTTC	peak15	M1_10_F1	2.83e-06	450	CD8
TGTGCCACTTGCCCGGCAGCCAATCAGCCCCAGCATTTT	peak15	M1_10_F1	1.06e-05	451	CD8
TGTGCCAGACAGCCTAACTATGGCTACACCTTC	peak15	M1_10_F1	9.2e-06	452	CD8
TGTGCCAGAGTCGTCGGGAATACAGGGCCCCCCTTTGCAACTAATGAAAAACTGTTTTTT	peak15	M1_10_F1	0	453	CD8
TGTGCCAGCAAAACAGGGGCTTCACCCCTCCACTTT	peak10	M1_10_F1	1.13e-05	454	CD4
TGTGCCAGCAAAATCGGGGGGGCGGCAGATACGCAGTATTTT	peak15	M1_10_F1	3.25e-05	455	CD4
[truncated: 7,319 more rows]

## Sheet: Fig2_source1(2A right)
CDR3	max	variable	value	id	phen
TGCACCAGCAGCCCTACATCATACTGGAATGAAAAACTGTTTTTT	peak45	M1_v2_0_F1	0	1	CD8
TGCAGACGGGGGGGCGCAGATACGCAGTATTTT	peak15	M1_v2_0_F1	0	2	CD8
TGCAGCATATCGGACAGGGGGCTCACCGGGGAGCTGTTTTTT	peak15	M1_v2_0_F1	1.2731e-06	3	CD8
TGCAGCGCACCACTAGCGGGGGGGAACAATGAGCAGTTCTTC	peak5	M1_v2_0_F1	0	4	CD8
TGCAGCGCACTCGAGGGCTATGGCTACACCTTC	peak0	M1_v2_0_F1	0	5	CD8
TGCAGCGCCCCACTAGCGGGGGGAGGGAATGAGCAGTTCTTC	peak5	M1_v2_0_F1	1.2731e-05	6	CD8
TGCAGCGCTTCCCCCGCCAGCTACAATGAGCAGTTCTTC	peak5	M1_v2_0_F1	3.81931e-06	7	CD4
TGCAGCGGTTGGAAGTCGGGGGAATTCTACGAGCAGTACGTC	peak0	M1_v2_0_F1	1.2731e-06	8	CD4
TGCAGCGTAAACAGGGGGATAGGGAACACTGAAGCTTTCTTT	peak5	M1_v2_0_F1	0	9	CD8
TGCAGCGTCACAACAGGGATCAGCTACGAGCAGTACTTC	peak10	M1_v2_0_F1	2.54621e-06	10	CD8
TGCAGCGTCACAGCACCAGCTAACTATGGCTACACCTTC	peak5	M1_v2_0_F1	0	11	CD4
TGCAGCGTCCCCCTGGGCGGTGGAGCCAATGAGCAGTTCTTC	peak15	M1_v2_0_F1	0	12	CD8
TGCAGCGTCCCTCTAAGCGGGGGGGGTAATGAGCAGTTCTTC	peak0	M1_v2_0_F1	0	13	CD8
TGCAGCGTCGGGATGACTAGCGGGGCCGAGGGGACCCAGTACTTC	peak0	M1_v2_0_F1	1.2731e-06	14	CD4
TGCAGCGTCTCCCTAAACGCGGGAAACACTGAAGCTTTCTTT	peak5	M1_v2_0_F1	0	15	CD4
TGCAGCGTGCAGGACATAGACACAGATACGCAGTATTTT	peak10	M1_v2_0_F1	1.2731e-06	16	CD4
TGCAGCGTGGGGGGGACTAGCGGACGGGGTACAGATACGCAGTATTTT	peak10	M1_v2_0_F1	0	17	CD8
TGCAGCGTTGAAGATTTTCCCACTGAAGCTTTCTTT	peak0	M1_v2_0_F1	0	18	CD8
TGCAGCGTTGAAGCGCACAGGGGCACCGGGGAGCTGTTTTTT	peak15	M1_v2_0_F1	0	19	CD4
TGCAGCGTTGACAGGAGGTCTGATGAAGCTTTCTTT	peak5	M1_v2_0_F1	0	20	CD8
TGCAGCGTTGGAGAGCCGACCCCTTATGGCTACACCTTC	peak5	M1_v2_0_F1	3.81931e-06	22	CD4
TGCAGCGTTGGAGGCGGGGTAAAGTGGGGCTACACCTTC	peak5	M1_v2_0_F1	2.54621e-06	23	CD4
TGCAGCGTTGGGGAGGGGGTTGCCTACGAGCAGTACTTC	peak0	M1_v2_0_F1	0	24	CD8
TGCAGCGTTGTCGTCTCGAGGGGGGAAGAGACCCAGTACTTC	peak5	M1_v2_0_F1	0	25	CD4
TGCAGCGTTTGGGACACAACTAACTATGGCTACACCTTC	peak5	M1_v2_0_F1	1.2731e-06	26	CD4
TGCAGTGAAAAGGGGGGGAGCTCCTACGAGCAGTACGTC	peak0	M1_v2_0_F1	0	27	CD8
TGCAGTGCAACGGGGAACCGGGGCACAGATACGCAGTATTTT	peak5	M1_v2_0_F1	0	28	CD8
TGCAGTGCAGCGGGCCAGCGGGGGGCAGATACGCAGTATTTT	peak0	M1_v2_0_F1	0	29	CD8
TGCAGTGCCAACAGGGGAGCCACTGAAGCTTTCTTT	peak15	M1_v2_0_F1	0	31	CD8
TGCAGTGCCCCCCAGGGGACCGGGGGGCACGACACTGAAGCTTTCTTT	peak0	M1_v2_0_F1	0	32	CD4
TGCAGTGCCCCCCGGCGGCAGGATGAGCAGTTCTTC	peak15	M1_v2_0_F1	4.32855e-05	33	CD8
TGCAGTGCCCCCGACAGGGAATCGGCGTTAAGGGAGACCCAGTACTTC	peak15	M1_v2_0_F1	0	34	CD8
TGCAGTGCCCCCGTGTACAGGGGTGCAGATACGCAGTATTTT	peak45	M1_v2_0_F1	0	35	CD8
TGCAGTGCCCCGACTAGCGGGGGGGACAATGAGCAGTTCTTC	peak5	M1_v2_0_F1	0	36	CD8
TGCAGTGCCCCGAGACGGACGGATGAGCAGTTCTTC	peak10	M1_v2_0_F1	0	37	CD8
TGCAGTGCCCCGCCCCCGGGAGGACAGAGCTCCTACAATGAGCAGTTCTTC	peak45	M1_v2_0_F1	0	38	CD4
TGCAGTGCCCCGCCCGCAACTAGCGGGGGAACAACACAAGAGACCCAGTACTTC	peak5	M1_v2_0_F1	0	39	CD4
TGCAGTGCCCCGTCCGGAGGGGGCCTTAATGAGCAGTTCTTC	peak15	M1_v2_0_F1	0	40	CD8
TGCAGTGCCCCTCTAGCGGGGGGGGGGAATGAGCAGTTCTTC	peak0	M1_v2_0_F1	0	41	CD8
TGCAGTGCCCTAGGAAAGCGGGGCACAGATACGCAGTATTTT	peak0	M1_v2_0_F1	0	42	CD8
TGCAGTGCCCTCGGGGGGGAAGCGTACGAGCAGTACTTC	peak15	M1_v2_0_F1	0	43	CD4
TGCAGTGCCGCTATGGGGCAGTACGTC	peak0	M1_v2_0_F1	0	44	CD8
TGCAGTGCCGGGACAGCGGCAACTAATGAAAAACTGTTTTTT	peak10	M1_v2_0_F1	5.09241e-06	45	CD8
TGCAGTGCCGGGTTGGGCCTCCCCTACGAGCAGTACTTC	peak45	M1_v2_0_F1	2.54621e-06	46	CD8
TGCAGTGCCGTCCTTCCGGGACTAGCGGGTTACAATGAGCAGTTCTTC	peak5	M1_v2_0_F1	1.65503e-05	47	CD8
TGCAGTGCCTTAGGAGCCCATTTAAATGAAAAACTGTTTTTT	peak0	M1_v2_0_F1	0	48	CD8
TGCAGTGCGATGACTAGCTCGTGGCAGACCCAGTACTTC	peak0	M1_v2_0_F1	0	49	CD4
TGCAGTGCGCCTGACAGGGGGCTTAGGAGCTACACCTTC	peak15	M1_v2_0_F1	0	50	CD4
TGCAGTGCGGCAAGGGGACAGGGGAGCAGCGATGAGCAGTTCTTC	peak15	M1_v2_0_F1	0	51	CD4
TGCAGTGCTAAATTATCCTCAGGGATTAGCAATCAGCCCCAGCATTTT	peak5	M1_v2_0_F1	1.2731e-06	52	CD4
TGCAGTGCTAACCGGGACCTAGGGGTAAACACCATATATTTT	peak5	M1_v2_0_F1	0	53	CD4
TGCAGTGCTACCTCATGGGGGAGCTCCTACAATGAGCAGTTCTTC	peak45	M1_v2_0_F1	0	54	CD8
TGCAGTGCTACCTCCCTGGACAGGGAACCTTTATCACTGGGCAATGAGCAGTTCTTC	peak5	M1_v2_0_F1	0	55	CD8
TGCAGTGCTACTCGACTAGCGGGGGGGTCTTACAATGAGCAGTTCTTC	peak5	M1_v2_0_F1	1.2731e-06	56	CD4
TGCAGTGCTAGAAGCTCCGGGACAGGGGCTGGAAACACCATATATTTT	peak0	M1_v2_0_F1	0	57	CD4
TGCAGTGCTAGAGAAGACTTGACAGGGACCTACAATGAGCAGTTCTTC	peak0	M1_v2_0_F1	0	59	CD8
TGCAGTGCTAGAGACCGGGACAGGGACTACAATGAGCAGTTCTTC	peak0	M1_v2_0_F1	0	60	CD8
TGCAGTGCTAGAGACTTCATCCGCACAGATACGCAGTATTTT	peak0	M1_v2_0_F1	0	61	CD8
TGCAGTGCTAGAGATGAGGGTTCTAACACCATATATTTT	peak45	M1_v2_0_F1	0	63	CD8
TGCAGTGCTAGAGATTACGGCAGAGCCATATATGGCTACACCTTC	peak0	M1_v2_0_F1	0	64	CD4
TGCAGTGCTAGAGCACAGGGGGACTATGGCTACACCTTC	peak10	M1_v2_0_F1	0	65	CD4
TGCAGTGCTAGAGGACTAGCGGGGGCCTTAGGCGTTGGCGAGCAGTACTTC	peak5	M1_v2_0_F1	2.54621e-06	66	CD8
TGCAGTGCTAGAGGGGGACAGGGGGCTCCAGGGTGGTCCTACAATGAGCAGTTCTTC	peak5	M1_v2_0_F1	0	67	CD4
TGCAGTGCTAGATTCGGCGGTGCCACAGATACGCAGTATTTT	peak45	M1_v2_0_F1	0	68	CD4
TGCAGTGCTAGCACACAGGGAGCTTACGAGCAGTACGTC	peak0	M1_v2_0_F1	0	69	CD8
TGCAGTGCTAGCCAGGCCGCGGCCTACGAGCAGTACTTC	peak45	M1_v2_0_F1	0	70	CD8
TGCAGTGCTAGCCTTAGCGGGGGGGCCGGGGGTGAGCAGTTCTTC	peak0	M1_v2_0_F1	2.54621e-06	71	CD8
TGCAGTGCTAGCGGAAGACTAGACGGATCCTACGAGCAGTACTTC	peak0	M1_v2_0_F1	0	72	CD8
TGCAGTGCTAGCGTGTGGGGGGGCCCCGGGGAGCTGTTTTTT	peak15	M1_v2_0_F1	3.81931e-06	73	CD4
TGCAGTGCTAGGCCCGACAGCAGCTCCTACGAGCAGTACTTC	peak15	M1_v2_0_F1	1.2731e-06	74	CD4
TGCAGTGCTAGGGCTAGCGGGGGCCCTGTCCCATACACAGATACGCAGTATTTT	peak15	M1_v2_0_F1	1.2731e-06	75	CD4
TGCAGTGCTAGGGCTTGGGGAGGGGGCGGTAGAATAGATGGAAACACCATATATTTT	peak10	M1_v2_0_F1	0	76	CD8
TGCAGTGCTAGGGGGGCTAGCACCGGGGGCACCGGGGAGCTGTTTTTT	peak0	M1_v2_0_F1	0	77	CD4
TGCAGTGCTAGGGTAGGACAGGGGCCTTCAGATACGCAGTATTTT	peak5	M1_v2_0_F1	0	78	CD4
TGCAGTGCTAGGTTCGCACAGGGTACCAATGAGCAGTTCTTC	peak5	M1_v2_0_F1	0	79	CD4
TGCAGTGCTAGTGAAGGGACTAGCGGGGGGGCGTACGAGCAGTACGTC	peak10	M1_v2_0_F1	0	80	CD8
TGCAGTGCTAGTGAGGGAACTTCCTACGAGCAGTACTTC	peak5	M1_v2_0_F1	0	81	CD8
TGCAGTGCTATCCTAGCGGGGAATCAAGAGACCCAGTACTTC	peak45	M1_v2_0_F1	0	82	CD4
TGCAGTGCTCCACGGACACCAGGGCCAGACAATGAGCAGTTCTTC	peak0	M1_v2_0_F1	2.54621e-06	83	CD4
TGCAGTGCTCCAGACAGGCGTAACACCGGGGAGCTGTTTTTT	peak10	M1_v2_0_F1	0	84	CD4
TGCAGTGCTCCCACTAGCGGGGGTCACAATGAGCAGTTCTTC	peak45	M1_v2_0_F1	0	85	CD8
TGCAGTGCTCCCGGACAGCTCTTGGGGGAGACCCAGTACTTC	peak10	M1_v2_0_F1	0	86	CD8
TGCAGTGCTCCCTGGGGCGCGGGGACTGAAGCTTTCTTT	peak0	M1_v2_0_F1	2.54621e-06	87	CD8
TGCAGTGCTCCGACTAGCGGGGGGGCTAATGAGCAGTTCTTC	peak10	M1_v2_0_F1	0	88	CD8
TGCAGTGCTCCGACTGGCGGGGGGTCCAACGAGCAGTACTTC	peak10	M1_v2_0_F1	8.91173e-06	89	CD8
TGCAGTGCTGAGAAAGAGTCGTGGAACGAGCAGTTCTTC	peak5	M1_v2_0_F1	1.2731e-06	90	CD4
TGCAGTGCTGATACAAATACAGGGGCTAGCAATCAGCCCCAGCATTTT	peak0	M1_v2_0_F1	1.2731e-06	91	CD4
TGCAGTGCTGGGGACAGTGTGAATGAGCAGTTCTTC	peak15	M1_v2_0_F1	1.2731e-06	92	CD8
TGCAGTGCTGGGGAGGGCGAGGGCCAGCCCCAGCATTTT	peak45	M1_v2_0_F1	0	93	CD8
TGCAGTGCTGGTACAGGGTTCCTTAATTCACCCCTCCACTTT	peak15	M1_v2_0_F1	0	94	CD8
TGCAGTGCTGTGCGGGGACAGGGAAGTTCGGATACGCAGTATTTT	peak5	M1_v2_0_F1	0	95	CD4
TGCAGTGCTTATGGACAGGGACCAGAAAAACTGTTTTTT	peak0	M1_v2_0_F1	3.81931e-06	96	CD4
TGCAGTGCTTCAGACCGGGACAGGGGAAACTACGAGCAGTACGTC	peak10	M1_v2_0_F1	0	97	CD8
TGCAGTGCTTCGATGGAGGCAGCCAGCACTTACGAGCAGTACTTC	peak5	M1_v2_0_F1	1.2731e-06	98	CD8
TGCAGTGCTTCTGCCGGGACAGAATCCAGCTCCTACGAGCAGTACTTC	peak5	M1_v2_0_F1	0	99	CD8
TGCAGTGGGCAGCCCGAAAGCTCCTACGAGCAGTACTTC	peak45	M1_v2_0_F1	0	100	CD8
TGCAGTGTAGCCGGGACCCCAACCTACGAGCAGTACTTC	peak10	M1_v2_0_F1	0	101	CD4
TGCAGTGTCCAGGGGGAGGTCGGGGAGCTGTTTTTT	peak0	M1_v2_0_F1	1.2731e-06	102	CD4
TGCAGTGTCCCGACTAGCGGGGGCTACAATGAGCAGTTCTTC	peak5	M1_v2_0_F1	0	103	CD8
TGCAGTGTGCGGACAGGGTACAATGAGCAGTTCTTC	peak0	M1_v2_0_F1	0	104	CD4
TGCAGTGTTCCGACTAGCGGGGGGGAAAACATTCAGTACTTC	peak10	M1_v2_0_F1	0	105	CD8
TGCATTCCTACGGGGGCAGGGATCTCTGGAAACACCATATATTTT	peak0	M1_v2_0_F1	0	106	CD8
TGCGCCACTCGGGACAGTGGGAACATTCAGTACTTC	peak0	M1_v2_0_F1	0	107	CD4
TGCGCCAGCAACACCGGAGTAGCGGGGGAGGACTACAATGAGCAGTTCTTC	peak10	M1_v2_0_F1	0	108	CD4
TGCGCCAGCAACGATCCTAGCGGGGGCAAGACCCAGTACTTC	peak15	M1_v2_0_F1	0	109	CD4
TGCGCCAGCACCGAGTAGGAAGCTTTCTTT	peak15	M1_v2_0_F1	0	110	CD8
TGCGCCAGCACTAACCTCGGGACAGGGGCGTTTTACGAGCAGTACTTC	peak45	M1_v2_0_F1	0	111	CD4
TGCGCCAGCAGAACGGACAGGGTGAGGTATGGCTACACCTTC	peak10	M1_v2_0_F1	5.09241e-06	112	CD8
TGCGCCAGCAGAATGGGACAGGGGGCATCAGATACGCAGTATTTT	peak15	M1_v2_0_F1	0	113	CD4
TGCGCCAGCAGAGGAACAGGCGGACCTCAAGAGACCCAGTACTTC	peak0	M1_v2_0_F1	0	114	CD8
TGCGCCAGCAGATCAGGATTCACTGAAGCTTTCTTT	peak45	M1_v2_0_F1	0	115	CD8
TGCGCCAGCAGCAAACACCGGGGGGGCCGGGAATGAGCAGTTCTTC	peak45	M1_v2_0_F1	1.2731e-06	116	CD8
TGCGCCAGCAGCACATTTAATTCACCCCTCCACTTT	peak0	M1_v2_0_F1	3.81931e-06	117	CD8
TGCGCCAGCAGCACCTCCTCGACAGGGGCCTATGGCTACACCTTC	peak0	M1_v2_0_F1	6.36552e-06	118	CD8
TGCGCCAGCAGCACGGACGTTGGGGGCGAGCAGTACTTC	peak10	M1_v2_0_F1	0	119	CD4
TGCGCCAGCAGCACGGAGGGGTCTGGTGGGGCCAACGTCCTGACTTTC	peak5	M1_v2_0_F1	0	120	CD4
TGCGCCAGCAGCACTAGTGGGGAGCTGTTTTTT	peak10	M1_v2_0_F1	1.2731e-06	121	CD4
TGCGCCAGCAGCCAAACAACGGCTCCAACCTACGAGCAGTACTTC	peak0	M1_v2_0_F1	3.81931e-06	122	CD8
TGCGCCAGCAGCCAAACCCTCTCCTACGAGCAGTACTTC	peak15	M1_v2_0_F1	1.2731e-06	123	CD8
TGCGCCAGCAGCCAAACCGAAGGGGGTGCTTATGGCTACACCTTC	peak5	M1_v2_0_F1	3.81931e-06	124	CD8
TGCGCCAGCAGCCAAACTCCGGGACAGGGGGCCGATGAGCAGTTCTTC	peak5	M1_v2_0_F1	1.2731e-06	125	CD4
TGCGCCAGCAGCCAACCGGGACTCTCCTACAATGAGCAGTTCTTC	peak5	M1_v2_0_F1	0	126	CD4
TGCGCCAGCAGCCAACCGTCCACGGACGAGCAGTACTTC	peak5	M1_v2_0_F1	0	127	CD8
TGCGCCAGCAGCCAAGAAAGAAATCTAGCGGGGGGTTATACGCAGTATTTT	peak0	M1_v2_0_F1	1.2731e-05	128	CD4
TGCGCCAGCAGCCAAGAAAGTAACACCGGGGAGCTGTTTTTT	peak5	M1_v2_0_F1	0	129	CD4
TGCGCCAGCAGCCAAGAACGGGCCTACGAGCAGTACTTC	peak10	M1_v2_0_F1	0	130	CD8
TGCGCCAGCAGCCAAGAACTGACCTACGAGCAGTACTTC	peak0	M1_v2_0_F1	0	131	CD8
TGCGCCAGCAGCCAAGACAGGGGAAGGGGCTACACCTTC	peak10	M1_v2_0_F1	0	132	CD4
TGCGCCAGCAGCCAAGACCACAGCCTCTCTCCCCAGCATTTT	peak15	M1_v2_0_F1	1.2731e-06	133	CD8
TGCGCCAGCAGCCAAGACCCCTCCGACACCGGGGAGCTGTTTTTT	peak0	M1_v2_0_F1	1.2731e-06	134	CD8
TGCGCCAGCAGCCAAGACCTGGCGGGGGGGTGGACTGAAGCTTTCTTT	peak5	M1_v2_0_F1	0	135	CD4
TGCGCCAGCAGCCAAGACGACAGGGCCAACGTCTATGGCTACACCTTC	peak5	M1_v2_0_F1	0	136	CD4
TGCGCCAGCAGCCAAGACGGGCGGACAGGGGGCGCCTATGGCTACACCTTC	peak10	M1_v2_0_F1	0	137	CD8
TGCGCCAGCAGCCAAGACGGGGGGCGCAGGGAGACCCAGTACTTC	peak5	M1_v2_0_F1	0	138	CD8
TGCGCCAGCAGCCAAGACGTAGCTAGCTCCTACAATGAGCAGTTCTTC	peak0	M1_v2_0_F1	0	139	CD8
TGCGCCAGCAGCCAAGACTATAGCATCTACCCTCGCGAGCAGTACTTC	peak45	M1_v2_0_F1	0	140	CD4
TGCGCCAGCAGCCAAGACTGGATAAATGAGCAGTTCTTC	peak0	M1_v2_0_F1	0	141	CD8
TGCGCCAGCAGCCAAGACTGGGTCGAGGGAAACTATGGCTACACCTTC	peak0	M1_v2_0_F1	0	142	CD8
TGCGCCAGCAGCCAAGAGCCCGGGACGGGGATTTACAATGAGCAGTTCTTC	peak0	M1_v2_0_F1	0	143	CD8
TGCGCCAGCAGCCAAGAGGCAGGGGGTTCTAACTATGGCTACACCTTC	peak10	M1_v2_0_F1	0	144	CD8
TGCGCCAGCAGCCAAGAGGGAACAGGCAACTATGGCTACACCTTC	peak0	M1_v2_0_F1	0	145	CD8
TGCGCCAGCAGCCAAGAGGTGACGGTAACTTCCTATGGCTACACCTTC	peak0	M1_v2_0_F1	1.2731e-06	146	CD8
TGCGCCAGCAGCCAAGAGGTGCAGGGGAACACCGGGGAGCTGTTTTTT	peak5	M1_v2_0_F1	0	147	CD4
TGCGCCAGCAGCCAAGAGTCAAGCACGGTCTACGAGCAGTACTTC	peak10	M1_v2_0_F1	0	148	CD8
TGCGCCAGCAGCCAAGAGTCCCCGAGCTCCGGGGAGCTGTTTTTT	peak5	M1_v2_0_F1	0	149	CD8
TGCGCCAGCAGCCAAGAGTCGCTGGGTAACTATGGCTACACCTTC	peak0	M1_v2_0_F1	1.2731e-06	150	CD8
TGCGCCAGCAGCCAAGATAACAACCCGGGCTATGGCTACACCTTC	peak10	M1_v2_0_F1	0	151	CD8
TGCGCCAGCAGCCAAGATACCCCTCAGCCCCAGCATTTT	peak10	M1_v2_0_F1	0	152	CD8
TGCGCCAGCAGCCAAGATACCCGGGAACCCCAGCATTTT	peak5	M1_v2_0_F1	1.2731e-06	153	CD4
TGCGCCAGCAGCCAAGATATCATAGTCAACATTCAGTACTTC	peak5	M1_v2_0_F1	0	154	CD4
TGCGCCAGCAGCCAAGATCAAGGCGGACAGGGGGCCTATGGCTACACCTTC	peak10	M1_v2_0_F1	0	155	CD8
TGCGCCAGCAGCCAAGATCAGCCCACCAAGCAGTTCTTC	peak10	M1_v2_0_F1	0	156	CD8
TGCGCCAGCAGCCAAGATCCCCGTACAGGGTTAGGCGATAATGAGCAGTTCTTC	peak5	M1_v2_0_F1	0	157	CD8
TGCGCCAGCAGCCAAGATCGGCGGGACCCCTACGAGCAGTACTTC	peak10	M1_v2_0_F1	0	158	CD8
TGCGCCAGCAGCCAAGATCGGGCAGCCTCTGGAAACACCATATATTTT	peak5	M1_v2_0_F1	0	159	CD4
TGCGCCAGCAGCCAAGATCTTACAGGGGGCGCGTACGAGCAGTACTTC	peak5	M1_v2_0_F1	0	160	CD8
TGCGCCAGCAGCCAAGATGAGCGGTGGTCGGGCTACACCTTC	peak0	M1_v2_0_F1	0	161	CD8
TGCGCCAGCAGCCAAGATGTGGGGCAGCCCCAGCATTTT	peak5	M1_v2_0_F1	0	162	CD4
TGCGCCAGCAGCCAAGATTCCGGGACAGGGGCTTACGAGCAGTACTTC	peak15	M1_v2_0_F1	0	163	CD8
TGCGCCAGCAGCCAAGATTGGGGACAGGGTGACGCTGAAGCTTTCTTT	peak5	M1_v2_0_F1	2.54621e-06	164	CD8
TGCGCCAGCAGCCAAGATTGGTCAGGGGGCCCCTACGAGCAGTACTTC	peak5	M1_v2_0_F1	0	165	CD4
TGCGCCAGCAGCCAAGCAACCGGGACAGCTTATGGCTACACCTTC	peak15	M1_v2_0_F1	0	166	CD8
TGCGCCAGCAGCCAAGCCCTTTTACGGGTGAACACTGAAGCTTTCTTT	peak15	M1_v2_0_F1	0	167	CD4
TGCGCCAGCAGCCAAGCGACAGCCTACGAGCAGTACGTC	peak5	M1_v2_0_F1	3.81931e-06	168	CD8
TGCGCCAGCAGCCAAGCGGACAGGGTTATGAACACTGAAGCTTTCTTT	peak5	M1_v2_0_F1	0	169	CD4
TGCGCCAGCAGCCAAGCTTCGCTGGCGGGTAACACCGGGGAGCTGTTTTTT	peak45	M1_v2_0_F1	0	170	CD8
TGCGCCAGCAGCCAAGGAGGCTATGGCTACACCTTC	peak45	M1_v2_0_F1	0	171	CD8
TGCGCCAGCAGCCAAGGATCCGCAGGGAACCAGCCCCAGCATTTT	peak0	M1_v2_0_F1	1.2731e-06	172	CD8
TGCGCCAGCAGCCAAGGCGAAACGGCAACCACCGGGGAGCTGTTTTTT	peak10	M1_v2_0_F1	0	173	CD8
TGCGCCAGCAGCCAAGGCGGGACAGCGGCATATGGCTACACCTTC	peak45	M1_v2_0_F1	0	174	CD8
TGCGCCAGCAGCCAAGGGGAAGCGGGGGGGCTTTACAATGAGCAGTTCTTC	peak45	M1_v2_0_F1	0	175	CD8
TGCGCCAGCAGCCAAGGGGGACCGGGACAGGGTCCAGATACGCAGTATTTT	peak45	M1_v2_0_F1	0	176	CD4
TGCGCCAGCAGCCAAGGGGGTATGATGAGTCAGCCCCAGCATTTT	peak5	M1_v2_0_F1	1.2731e-06	177	CD8
TGCGCCAGCAGCCAAGGGTCAGGGGTCGGTAATTCACCCCTCCACTTT	peak45	M1_v2_0_F1	0	178	CD8
TGCGCCAGCAGCCAAGGGTCGGACAGGGGGCAGGACGAGCAGTACTTC	peak15	M1_v2_0_F1	1.2731e-06	179	CD8
TGCGCCAGCAGCCAAGGTTATGCGAATAGCATCCATGAGCAGTTCTTC	peak0	M1_v2_0_F1	1.2731e-06	180	CD4
TGCGCCAGCAGCCAAGTAACAGGGGGAAGCTATGGCTACACCTTC	peak0	M1_v2_0_F1	0	181	CD8
TGCGCCAGCAGCCAAGTAACGGAGACAGGGCCGTATGGCTACACCTTC	peak10	M1_v2_0_F1	0	182	CD8
TGCGCCAGCAGCCAAGTAAGCACTGAAGCTTTCTTT	peak0	M1_v2_0_F1	6.36552e-06	183	CD8
TGCGCCAGCAGCCAAGTCCTCTGGTACAATGAGCAGTTCTTC	peak0	M1_v2_0_F1	3.81931e-06	184	CD4
TGCGCCAGCAGCCAAGTGGAAAGTGCGCGAGGAAACATTCAGTACTTC	peak0	M1_v2_0_F1	0	185	CD8
TGCGCCAGCAGCCAAGTTTTCACCAACTCCTACAATGAGCAGTTCTTC	peak15	M1_v2_0_F1	0	186	CD8
TGCGCCAGCAGCCACGGGACAGGGGGCAATCAGCCCCAGCATTTT	peak5	M1_v2_0_F1	0	187	CD8
TGCGCCAGCAGCCACGGGACGGCCTATGGCTACACCTTC	peak5	M1_v2_0_F1	0	188	CD8
TGCGCCAGCAGCCAGACGTGGGCAGGGGCCTTACCCTACGAGCAGTACTTC	peak0	M1_v2_0_F1	0	189	CD8
TGCGCCAGCAGCCAGCTAGCTACGAGCTCCTACGAGCAGTACTTC	peak10	M1_v2_0_F1	1.2731e-06	190	CD8
TGCGCCAGCAGCCAGCTTTCTAGCGGGGGACCACCGAGGAGGGATACGCAGTATTTT	peak0	M1_v2_0_F1	0	191	CD8
TGCGCCAGCAGCCAGGGACCCGGGACAGGAGCCTACGAGCAGTACTTC	peak5	M1_v2_0_F1	0	192	CD8
TGCGCCAGCAGCCAGGGCGGGGCGGGGGGCTCCTACGAGCAGTACTTC	peak10	M1_v2_0_F1	0	193	CD8
TGCGCCAGCAGCCAGTTTGTGAGCTCCTACGAGCAGTACTTC	peak5	M1_v2_0_F1	0	194	CD8
TGCGCCAGCAGCCATGCCGGGCAGGCGACTTTCTTT	peak45	M1_v2_0_F1	0	195	CD8
TGCGCCAGCAGCCATGGGGGTGGAAACACCATATATTTT	peak45	M1_v2_0_F1	0	196	CD8
TGCGCCAGCAGCCCAGCGGGGGACTCCTACGAGCAGTACTTC	peak5	M1_v2_0_F1	0	197	CD8
TGCGCCAGCAGCCCAGGACAGGGGTCCTACGAGCAGTACTTC	peak45	M1_v2_0_F1	0	198	CD8
TGCGCCAGCAGCCCAGTGGCGGGGAGCTCCTACGAGCAGTACTTC	peak0	M1_v2_0_F1	0	199	CD8
TGCGCCAGCAGCCCCGACAGTGGACTCACAGATACGCAGTATTTT	peak0	M1_v2_0_F1	0	200	CD4
TGCGCCAGCAGCCCCGCGGAGGCCTACGAGCAGTACTTC	peak10	M1_v2_0_F1	0	201	CD8
TGCGCCAGCAGCCCCGGGACAGGAGCGGGCTATGGCTACACCTTC	peak10	M1_v2_0_F1	2.54621e-06	202	CD8
TGCGCCAGCAGCCCCTACTCAGGGGGAGGTGAGCAGTTCTTC	peak10	M1_v2_0_F1	0	203	CD8
TGCGCCAGCAGCCCCTCACAGGCCTACGAGCAGTACTTC	peak5	M1_v2_0_F1	0	204	CD8
TGCGCCAGCAGCCCCTCCCGAACGGGGGCCTACGAGCAGTACTTC	peak45	M1_v2_0_F1	1.2731e-06	205	CD8
TGCGCCAGCAGCCCCTCTCCAGGGGAGGCCTATGGCTACACCTTC	peak10	M1_v2_0_F1	1.78235e-05	206	CD8
TGCGCCAGCAGCCCCTTACAGGGAAGCTCCTACGAGCAGTACTTC	peak5	M1_v2_0_F1	0	207	CD4
TGCGCCAGCAGCCCGACAGGGCAAAACGCTGAAGCTTTCTTT	peak0	M1_v2_0_F1	0	208	CD4
TGCGCCAGCAGCCCGACGGAGATTAGGGCCTTC	peak15	M1_v2_0_F1	0	209	CD8
TGCGCCAGCAGCCCGGAGGCAGATTCAACTAATGAAAAACTGTTTTTT	peak5	M1_v2_0_F1	0	210	CD4
TGCGCCAGCAGCCCGGGACAGACCCTAACTATACAAGAGACCCAGTACTTC	peak15	M1_v2_0_F1	0	211	CD4
TGCGCCAGCAGCCCGTCTATGGCAGCGAGCTACGAGCAGTACTTC	peak10	M1_v2_0_F1	1.2731e-06	212	CD8
TGCGCCAGCAGCCCTAGCGGGGGGACCGCCTACGAGCAGTACTTC	peak0	M1_v2_0_F1	8.91173e-06	213	CD8
TGCGCCAGCAGCCCTGCGGCTAGCCTCCTTAACACCGGGGAGCTGTTTTTT	peak5	M1_v2_0_F1	0	214	CD4
TGCGCCAGCAGCCGACAAGTTGGGATATCGAGCACGCCAGATACGCAGTATTTT	peak0	M1_v2_0_F1	3.81931e-06	215	CD4
TGCGCCAGCAGCCGATCGCCCCCGGAACAGGGGGTTGGTCAGCCCCAGCATTTT	peak45	M1_v2_0_F1	1.2731e-06	216	CD4
TGCGCCAGCAGCCGATCGGGACAGCCTTACTACAATGAGCAGTTCTTC	peak10	M1_v2_0_F1	0	217	CD8
TGCGCCAGCAGCCGCGGGGACCCAGCCTACGAGCAGTACTTC	peak45	M1_v2_0_F1	1.2731e-06	218	CD8
TGCGCCAGCAGCCGGAACCCTCGGGACATCTCTGGGGCCAACGTCCTGACTTTC	peak5	M1_v2_0_F1	1.2731e-06	219	CD4
TGCGCCAGCAGCCGGCGGACTAGCGGGGGGGATACAGATACGCAGTATTTT	peak5	M1_v2_0_F1	6.36552e-06	220	CD4
TGCGCCAGCAGCCGGGGACAGCCGAACACTGAAGCTTTCTTT	peak5	M1_v2_0_F1	0	221	CD4
TGCGCCAGCAGCCGGGGAGAGGGTCGGGACAATAGGTCACCCCTCCACTTT	peak45	M1_v2_0_F1	0	222	CD8
TGCGCCAGCAGCCGGGGGGGGGGCTACAATGAGCAGTTCTTC	peak5	M1_v2_0_F1	0	223	CD8
TGCGCCAGCAGCCTAGGGACAGGGGATGAGCAGTTCTTC	peak5	M1_v2_0_F1	3.81931e-06	224	CD8
TGCGCCAGCAGCCTCCTCGAAAACTCTGGAAACACCATATATTTT	peak45	M1_v2_0_F1	0	225	CD4
TGCGCCAGCAGCCTGAGATATAGCACAGATACGCAGTATTTT	peak15	M1_v2_0_F1	5.09241e-06	226	CD8
TGCGCCAGCAGCCTGGCCGAGCGGGCCGGGGAGCTGTTTTTT	peak5	M1_v2_0_F1	2.54621e-06	227	CD4
TGCGCCAGCAGCCTGGGCGGAGCGCGCACAGATACGCAGTATTTT	peak45	M1_v2_0_F1	0	228	CD4
TGCGCCAGCAGCGAGCAGGTCGGGGGGCGATACAATGAGCAGTTCTTC	peak5	M1_v2_0_F1	0	229	CD4
TGCGCCAGCAGCGATGGACAGGGAACAGATACGCAGTATTTT	peak5	M1_v2_0_F1	0	230	CD4
TGCGCCAGCAGCGCCCGAGGAGGCGGGAACACAGATACGCAGTATTTT	peak5	M1_v2_0_F1	0	231	CD4
TGCGCCAGCAGCGGAGGGGGCGAGCAGTACTTC	peak15	M1_v2_0_F1	0	232	CD8
TGCGCCAGCAGCGGGCCCGACTCTGGAAACACCATATATTTT	peak5	M1_v2_0_F1	0	233	CD4
TGCGCCAGCAGCGGGGCGGGGGGGTACGAGCAGTACTTC	peak10	M1_v2_0_F1	0	234	CD8
TGCGCCAGCAGCGTAGTAGGGGGTTTTGAGCAGTTCTTC	peak5	M1_v2_0_F1	0	235	CD4
TGCGCCAGCAGCTACCAAAGGACAGGCGGTGAAGCTTTCTTT	peak5	M1_v2_0_F1	0	236	CD4
TGCGCCAGCAGCTCAACTTACACCGGGGAGCTGTTTTTT	peak10	M1_v2_0_F1	0	237	CD4
TGCGCCAGCAGCTCACAGACAGGCTCAAAAAACATTCAGTACTTC	peak5	M1_v2_0_F1	2.54621e-06	238	CD4
TGCGCCAGCAGCTCCCCTAGCGGGGGTAATGAGCAGTTCTTC	peak5	M1_v2_0_F1	0	239	CD4
TGCGCCAGCAGCTCCCGGATATCGACGCCGCCAGATACGCAGTATTTT	peak5	M1_v2_0_F1	0	240	CD4
TGCGCCAGCAGCTCCGCGGAGGCCTACGAGCAGTACTTC	peak5	M1_v2_0_F1	0	241	CD8
TGCGCCAGCAGCTCGCAATTTTCAGTCGGGACAGGGCAAAACATTCAGTACTTC	peak5	M1_v2_0_F1	0	242	CD4
TGCGCCAGCAGCTCGCCGGACAGCACAGATACGCAGTATTTT	peak5	M1_v2_0_F1	0	243	CD4
TGCGCCAGCAGCTCGGACGTGGGAGGTGAGCAGTTCTTC	peak0	M1_v2_0_F1	0	244	CD4
TGCGCCAGCAGCTCGGGGCAGGGAACCTATGGCTACACCTTC	peak5	M1_v2_0_F1	0	245	CD4
TGCGCCAGCAGCTCGGGTGGACAGGGGGCAGACTATGGCTACACCTTC	peak5	M1_v2_0_F1	2.54621e-06	246	CD8
TGCGCCAGCAGCTGGACTGACAGCGCACCTTTCTACGAGCAGTACTTC	peak5	M1_v2_0_F1	1.14579e-05	247	CD8
TGCGCCAGCAGCTTAAACCTCCTCTCGTCCAATGAGCAGTTCTTC	peak10	M1_v2_0_F1	0	248	CD4
TGCGCCAGCAGCTTACAGGGCGATGAGCAGTTCTTC	peak0	M1_v2_0_F1	0	249	CD4
TGCGCCAGCAGCTTACTAGGGGGGATTCAAGAGACCCAGTACTTC	peak45	M1_v2_0_F1	0	250	CD4
TGCGCCAGCAGCTTATACGTGTCGGCAGATACGCAGTATTTT	peak15	M1_v2_0_F1	0	251	CD4
TGCGCCAGCAGCTTCCAGGGGTCTGAAGCTTTCTTT	peak0	M1_v2_0_F1	0	252	CD4
TGCGCCAGCAGCTTCGACTCTACCGGGGAGCTGTTTTTT	peak0	M1_v2_0_F1	0	253	CD8
TGCGCCAGCAGCTTCGGACAGGACCCAGATACGCAGTATTTT	peak0	M1_v2_0_F1	0	254	CD4
TGCGCCAGCAGCTTCTCGACAGGAACCTACGAGCAGTACTTC	peak5	M1_v2_0_F1	0	255	CD4
TGCGCCAGCAGCTTGATGTCAGGAGAAAATGAGCAGTTCTTC	peak5	M1_v2_0_F1	0	256	CD4
TGCGCCAGCAGCTTGCTATCTGGACAGAGCTCCTACAATGAGCAGTTCTTC	peak5	M1_v2_0_F1	0	257	CD4
TGCGCCAGCAGCTTGGAACAGGGCTATGGCTACACCTTC	peak5	M1_v2_0_F1	2.54621e-06	258	CD4
TGCGCCAGCAGCTTGGAACCCGATCAGCCCCAGCATTTT	peak15	M1_v2_0_F1	0	259	CD4
TGCGCCAGCAGCTTGGAAGGGTCGGGTGGGGCCAACGTCCTGACTTTC	peak0	M1_v2_0_F1	0	260	CD4
TGCGCCAGCAGCTTGGAATACGTAGGGAATTCACCCCTCCACTTT	peak5	M1_v2_0_F1	0	261	CD4
TGCGCCAGCAGCTTGGAATGGGGAACTGGAAACACCATATATTTT	peak0	M1_v2_0_F1	2.54621e-06	262	CD4
TGCGCCAGCAGCTTGGACCCAAACGACTATGGCTACACCTTC	peak45	M1_v2_0_F1	0	263	CD4
TGCGCCAGCAGCTTGGACCCCCCAGATGCAGGAAACACCATATATTTT	peak5	M1_v2_0_F1	0	264	CD4
TGCGCCAGCAGCTTGGACGAAGCCTACGAGCAGTACTTC	peak5	M1_v2_0_F1	2.54621e-06	265	CD8
TGCGCCAGCAGCTTGGACGGAGACCCACTACGGGAGCAGTACGTC	peak10	M1_v2_0_F1	0	266	CD4
TGCGCCAGCAGCTTGGAGAGCACAGATACGCAGTATTTT	peak5	M1_v2_0_F1	0	267	CD4
TGCGCCAGCAGCTTGGAGAGGATGGATCAGCCCCAGCATTTT	peak0	M1_v2_0_F1	2.54621e-06	268	CD4
TGCGCCAGCAGCTTGGAGGCGAGAATCACCTACAATGAGCAGTTCTTC	peak0	M1_v2_0_F1	2.54621e-06	269	CD4
TGCGCCAGCAGCTTGGAGGGGCTGATCTATGGCTACACCTTC	peak5	M1_v2_0_F1	0	270	CD4
TGCGCCAGCAGCTTGGCCAGGGCAAACACCGGGGAGCTGTTTTTT	peak5	M1_v2_0_F1	0	271	CD4
TGCGCCAGCAGCTTGGCCCCAGGGCCCTACGAGCAGTACTTC	peak10	M1_v2_0_F1	1.2731e-06	272	CD4
TGCGCCAGCAGCTTGGCCGAGGCTTACGAGCAGTACTTC	peak15	M1_v2_0_F1	0	273	CD8
TGCGCCAGCAGCTTGGCCGGCGGGGGCGGAGAGACCCAGTACTTC	peak15	M1_v2_0_F1	0	274	CD4
TGCGCCAGCAGCTTGGCCTGGGGAAATCCCACAGATACGCAGTATTTT	peak5	M1_v2_0_F1	0	275	CD4
TGCGCCAGCAGCTTGGCGGACAGGGGGCGTGAAGCTTTCTTT	peak15	M1_v2_0_F1	0	276	CD4
TGCGCCAGCAGCTTGGCGTACCTGAACACTGAAGCTTTCTTT	peak10	M1_v2_0_F1	0	277	CD8
TGCGCCAGCAGCTTGGGAAACGGAGGCGAGCAGTACTTC	peak0	M1_v2_0_F1	0	278	CD4
TGCGCCAGCAGCTTGGGGACAGGTGGCAATCAGCCCCAGCATTTT	peak5	M1_v2_0_F1	0	279	CD8
TGCGCCAGCAGCTTGGGGGACAGCGTAGATCAGCCCCAGCATTTT	peak10	M1_v2_0_F1	0	280	CD4
TGCGCCAGCAGCTTGGGGGACAGTTTAAGGCCCCTCCACTTT	peak15	M1_v2_0_F1	0	281	CD4
TGCGCCAGCAGCTTGGGGGGGGGGCGCAATGAGCAGTTCTTC	peak0	M1_v2_0_F1	0	282	CD4
TGCGCCAGCAGCTTGGTAAGAGGGGCCAACGTCCTGACTTTC	peak5	M1_v2_0_F1	0	283	CD4
TGCGCCAGCAGCTTGGTGGTGGGGGCCAACAATGAGCAGTTCTTC	peak5	M1_v2_0_F1	0	284	CD4
TGCGCCAGCAGCTTTCAGGGGGGCACTGAAGCTTTCTTT	peak15	M1_v2_0_F1	1.2731e-06	285	CD8
TGCGCCAGCAGCTTTCTCGGGGTCGATGGGGAGACCCAGTACTTC	peak5	M1_v2_0_F1	2.54621e-06	286	CD4
TGCGCCAGCAGCTTTGTCAGGCTCCAAGGAAACACTGAAGCTTTCTTT	peak15	M1_v2_0_F1	0	287	CD8
TGCGCCAGCAGCTTTTCCGGGACAGGGAACAATGAGCAGTTCTTC	peak5	M1_v2_0_F1	2.03697e-05	288	CD8
TGCGCCAGCAGGAATCCCCGGAGCTCCTACGAGCAGTACTTC	peak45	M1_v2_0_F1	2.54621e-06	289	CD8
TGCGCCAGCAGGCAGGGACAGGGGGGCTACACCTTC	peak45	M1_v2_0_F1	0	290	CD8
TGCGCCAGCAGGGAAGGGACTAGCGGGGGGCAAAATACGCAGTATTTT	peak5	M1_v2_0_F1	0	291	CD4
TGCGCCAGCAGGGACATGAATTACGAGCAGTACTTC	peak0	M1_v2_0_F1	1.2731e-06	292	CD4
TGCGCCAGCAGGGCGGAGCTATCTATGAACACTGAAGCTTTCTTT	peak5	M1_v2_0_F1	0	293	CD4
TGCGCCAGCAGGTCCGGGACAACGAACTATGGCTACACCTTC	peak0	M1_v2_0_F1	0	294	CD8
TGCGCCAGCAGTAACCTAGCGGGGGGGGAAGAGACCCAGTACTTC	peak5	M1_v2_0_F1	0	295	CD4
TGCGCCAGCAGTCAACCAGGACAGGGGCCCCCTACGAGCAGTACTTC	peak15	M1_v2_0_F1	0	296	CD8
TGCGCCAGCAGTCAAGAGGCAGCCAGCTCCTATAATTCACCCCTCCACTTT	peak0	M1_v2_0_F1	1.2731e-06	297	CD8
TGCGCCAGCAGTCAATCCCCGTGGTCCAGGGGGGTATAGCTGTTTTTT	peak10	M1_v2_0_F1	0	298	CD8
TGCGCCAGCAGTCCCTAGGGAGGAGGGCCTGAGAGCAGTACTTC	peak0	M1_v2_0_F1	0	299	CD8
TGCGCCAGCAGTCTCTTAGCACAGATACGCAGTATTTT	peak45	M1_v2_0_F1	0	300	CD8
TGCGCCAGCAGTCTTGAGGTAGGCACTGAAGCTTTCTTT	peak15	M1_v2_0_F1	1.2731e-06	301	CD8
TGCGCCAGCAGTGAGATCCGAGGGACAGGGTCCCACGAGCAGTACTTC	peak45	M1_v2_0_F1	2.54621e-06	302	CD8
TGCGCCAGCAGTGAGGAGGAGGTAGCCTACGAGCAGTACTTC	peak15	M1_v2_0_F1	0	303	CD8
TGCGCCAGCAGTGAGGGAAGGACAGGGGACTACAATGAGCAGTTCTTC	peak5	M1_v2_0_F1	0	304	CD4
TGCGCCAGCAGTGAGTCGGGGACTAGCGAATACAATGAGCAGTTCTTC	peak5	M1_v2_0_F1	0	305	CD4
TGCGCCAGCAGTGCTACGGGTGCCTACGAGCAGTACTTC	peak0	M1_v2_0_F1	0	306	CD8
TGCGCCAGCAGTGTTGAGCGGGAAACTTACGAGCAGTACTTC	peak45	M1_v2_0_F1	0	307	CD8
TGCGCCAGCAGTTAACAGGGGGCAATCGGGGAGCTGTTTTTT	peak15	M1_v2_0_F1	0	308	CD8
TGCGCCAGCCGACGGACAGCAGGAGCCCACAGCCCCAGCATTTT	peak5	M1_v2_0_F1	0	309	CD8
TGCGCCAGCCGGCGGGAGGGAACGATGAACACTGAAGCTTTCTTT	peak5	M1_v2_0_F1	0	310	CD4
TGCGCCAGCCGGGACGGAGCCTACGAGCAGTACTTC	peak5	M1_v2_0_F1	0	311	CD4
TGCGCCAGCCGGGGAGGGGGACAGGGGATACAGAACTATGGCTACACCTTC	peak10	M1_v2_0_F1	0	312	CD8
TGCGCCAGCCTTGGCGAGGGGAGAAGCACCGGGGAGCTGTTTTTT	peak0	M1_v2_0_F1	0	313	CD8
TGCGCCAGCGGGGTCGGAACCTACAATGAGCAGTTCTTC	peak5	M1_v2_0_F1	5.09241e-06	314	CD4
TGCGCCAGCTCCCCATGGCGGGGGGCCTACAATGAGCAGTTCTTC	peak15	M1_v2_0_F1	0	315	CD8
TGCGCCAGCTTAGGTCCGAATAATTCACCCCTCCACTTT	peak15	M1_v2_0_F1	0	316	CD8
TGCTCCCAGGGGGACAGGGGTCTTAACACTGAAGCTTTCTTT	peak10	M1_v2_0_F1	0	317	CD8
TGTGCCAACTAGCACCCGGGGCTCATCTTCAATCAGCCCCAGCATTTT	peak0	M1_v2_0_F1	0	318	CD4
TGTGCCAATACGGGACTGAACACCGGGGAGCTGTTTTTT	peak5	M1_v2_0_F1	0	319	CD8
TGTGCCACACTATCCGGGACAACGAACACCGGGGAGCTGTTTTTT	peak10	M1_v2_0_F1	0	320	CD4
TGTGCCACAGGCCGGTCCTCGACCTACGAGCAGTACTTC	peak0	M1_v2_0_F1	0	321	CD8
TGTGCCACCAAACCGGGCCCCGGTTCGCCCCAGCATTTT	peak45	M1_v2_0_F1	0	322	CD4
TGTGCCACCACGGAGGGGGGGGCCTACGAGCAGTACTTC	peak5	M1_v2_0_F1	0	323	CD8
TGTGCCACCACTAACCGACCCTCTGGGGCCAACGTCCTGACTTTC	peak45	M1_v2_0_F1	2.54621e-06	324	CD8
TGTGCCACCAGCACCCGGGCCGCCGGCGAGCAGTACTTC	peak0	M1_v2_0_F1	3.81931e-06	325	CD8
TGTGCCACCAGCACCGCAACAGGGGGATACGAGCAGTACTTC	peak15	M1_v2_0_F1	0	326	CD8
TGTGCCACCAGCACCGCCGAGAACTATGGCTACACCTTC	peak5	M1_v2_0_F1	1.2731e-06	327	CD8
TGTGCCACCAGCACGGGCTTGGCCTACGAGCAGTACGTC	peak15	M1_v2_0_F1	1.2731e-06	328	CD8
TGTGCCACCAGCAGAACCGACAGGATCCTCATCGAGCAGTACTTC	peak0	M1_v2_0_F1	0	329	CD8
TGTGCCACCAGCAGACAGGCGAATACAGATACGCAGTATTTT	peak0	M1_v2_0_F1	3.81931e-06	330	CD8
TGTGCCACCAGCAGAGAGGAAAGGAGGGCTAATGAAAAACTGTTTTTT	peak10	M1_v2_0_F1	0	331	CD8
TGTGCCACCAGCAGAGAGGTCGCGGGTTACAATGAGCAGTTCTTC	peak0	M1_v2_0_F1	0	332	CD4
TGTGCCACCAGCAGAGATCAAGAGGGAGCCAATCAGCCCCAGCATTTT	peak10	M1_v2_0_F1	0	333	CD8
TGTGCCACCAGCAGAGATCGACCAGGCCAGCCCCAGCATTTT	peak45	M1_v2_0_F1	0	334	CD8
TGTGCCACCAGCAGAGATCTCCCGACAGGACGACAAGAGACCCAGTACTTC	peak0	M1_v2_0_F1	0	335	CD8
TGTGCCACCAGCAGAGATGCGGACGGGCCCAGATCACCCCTCCACTTT	peak5	M1_v2_0_F1	1.2731e-06	336	CD4
TGTGCCACCAGCAGAGATTCCCCCATACTCAGCATTCAGTACTTC	peak5	M1_v2_0_F1	0	337	CD4
TGTGCCACCAGCAGAGATTGGCTAGCGGGGGGGCAAGAGACCCAGTACTTC	peak5	M1_v2_0_F1	0	338	CD8
TGTGCCACCAGCAGAGCCCCACTAGCGGGGGGTAATGAGCAGTTCTTC	peak10	M1_v2_0_F1	0	339	CD8
TGTGCCACCAGCAGAGCCCCAGGGTACGAGCAGTACGTC	peak10	M1_v2_0_F1	6.36552e-06	340	CD8
TGTGCCACCAGCAGAGCCCCCCTAGCGGGGGGCAATGAGCAGTTCTTC	peak5	M1_v2_0_F1	0	341	CD8
TGTGCCACCAGCAGAGCCGGGGCCTACGAGCAGTACTTC	peak15	M1_v2_0_F1	2.54621e-06	342	CD8
TGTGCCACCAGCAGAGCGACAGGGGCTCAGCCCCAGCATTTT	peak45	M1_v2_0_F1	0	343	CD8
TGTGCCACCAGCAGAGCGACGGGCGCTGAAGCTTTCTTT	peak0	M1_v2_0_F1	1.2731e-06	344	CD8
TGTGCCACCAGCAGAGCGAGCCTCACAGATACGCAGTATTTT	peak0	M1_v2_0_F1	0	345	CD8
TGTGCCACCAGCAGAGCGGACCCTGCCTACGAGCAGTACTTC	peak0	M1_v2_0_F1	0	346	CD8
TGTGCCACCAGCAGAGCGGCAGGTTCCTACGAGCAGTACTTC	peak5	M1_v2_0_F1	0	347	CD8
TGTGCCACCAGCAGAGCGGTAGCGGGGGGCAATGAGCAGTTCTTC	peak5	M1_v2_0_F1	0	348	CD4
TGTGCCACCAGCAGAGCTATGAACACTGAAGCTTTCTTT	peak15	M1_v2_0_F1	7.63862e-06	349	CD8
TGTGCCACCAGCAGAGGACAGAGAACCTACGAGCAGTACTTC	peak45	M1_v2_0_F1	0	350	CD8
TGTGCCACCAGCAGAGGACAGCTCTACGAGCAGTACTTC	peak0	M1_v2_0_F1	0	351	CD8
TGTGCCACCAGCAGAGGACAGGCCTACGAGCAGTACGTC	peak5	M1_v2_0_F1	0	352	CD8
TGTGCCACCAGCAGAGGACAGGCGGGCGGTAATTCACCCCTCCACTTT	peak5	M1_v2_0_F1	0	353	CD8
TGTGCCACCAGCAGAGGACAGGGGCGGACCTACGAGCAGTACTTC	peak45	M1_v2_0_F1	0	354	CD8
TGTGCCACCAGCAGAGGACAGGGGTACGAGCAGTACTTC	peak15	M1_v2_0_F1	0	355	CD8
TGTGCCACCAGCAGAGGACAGGGTTACGAGCAGTACGTC	peak0	M1_v2_0_F1	0	356	CD8
TGTGCCACCAGCAGAGGACAGGTCTCCTACAATGAGCAGTTCTTC	peak10	M1_v2_0_F1	0	357	CD8
TGTGCCACCAGCAGAGGACTAGTTGGTTCCTACAATGAGCAGTTCTTC	peak10	M1_v2_0_F1	1.2731e-06	358	CD8
TGTGCCACCAGCAGAGGAGAAAACACTGAAGCTTTCTTT	peak10	M1_v2_0_F1	3.81931e-06	359	CD8
TGTGCCACCAGCAGAGGAGGAGGGTACGAGCAGTACTTC	peak45	M1_v2_0_F1	0	360	CD8
TGTGCCACCAGCAGAGGCAAGGGCTCCTACAATGAGCAGTTCTTC	peak0	M1_v2_0_F1	0	361	CD8
TGTGCCACCAGCAGAGGCCAGAGACTCTACGAGCAGTACTTC	peak45	M1_v2_0_F1	0	362	CD8
TGTGCCACCAGCAGAGGCCGGAGCTCCTACAATGAGCAGTTCTTC	peak15	M1_v2_0_F1	0	363	CD8
TGTGCCACCAGCAGAGGGATTTCCTACGAGCAGTACGTC	peak10	M1_v2_0_F1	1.2731e-06	364	CD8
TGTGCCACCAGCAGAGGGGAATCCTACGAGCAGTACTTC	peak10	M1_v2_0_F1	0	365	CD8
TGTGCCACCAGCAGAGGGGCAGCTTATAGCAATCAGCCCCAGCATTTT	peak0	M1_v2_0_F1	1.2731e-06	366	CD8
TGTGCCACCAGCAGAGGGGGGGCCTACGAGCAGTACTTC	peak5	M1_v2_0_F1	0	367	CD8
TGTGCCACCAGCAGAGGGTCCGGGACAGGGGCCTACGAGCAGTACTTC	peak15	M1_v2_0_F1	0	368	CD8
TGTGCCACCAGCAGAGGTCAACAGCCGTTGGACTATGGCTACACCTTC	peak45	M1_v2_0_F1	0	369	CD8
TGTGCCACCAGCAGAGTAGCCTACGCGTCTCAAGAGACCCAGTACTTC	peak10	M1_v2_0_F1	0	370	CD8
TGTGCCACCAGCAGAGTCGAACTTCGCCAAGGGTCCCAGTACTTC	peak0	M1_v2_0_F1	1.52772e-05	371	CD8
TGTGCCACCAGCAGATCCCCAGGGCTCGAGCAGTACGTC	peak0	M1_v2_0_F1	0	372	CD8
TGTGCCACCAGCAGATCGCTTGGCTACGAGCAGTACTTC	peak0	M1_v2_0_F1	0	373	CD8
TGTGCCACCAGCAGCGGACAGAGGAATTACAATGAGCAGTTCTTC	peak0	M1_v2_0_F1	1.2731e-06	374	CD8
TGTGCCACCAGCAGCGGGACAGGACCCTACGAGCAGTACGTC	peak0	M1_v2_0_F1	1.2731e-06	375	CD8
TGTGCCACCAGCAGCGGGACAGGTCCCTACGAGCAGTACTTC	peak5	M1_v2_0_F1	0	376	CD8
TGTGCCACCAGCAGCGGGACCGCATACGAGCAGTACGTC	peak5	M1_v2_0_F1	0	377	CD8
TGTGCCACCAGCAGGACAGGAGGGCATGAGCAGTTCTTC	peak0	M1_v2_0_F1	0	378	CD8
TGTGCCACCAGCAGGGGACTAGCCTACAATGAGCAGTTCTTC	peak10	M1_v2_0_F1	0	379	CD8
TGTGCCACCAGCAGGGGACTAGCGGGGGCCTACAATGAGCAGTTCTTC	peak0	M1_v2_0_F1	0	380	CD8
TGTGCCACCAGCAGGGGCGGAGGGTACGAGCAGTACTTC	peak0	M1_v2_0_F1	0	381	CD8
TGTGCCACCAGCAGGGGGATTTCGGGGCCATACAATGAGCAGTTCTTC	peak10	M1_v2_0_F1	0	382	CD8
TGTGCCACCAGCAGGGGTCTTAGCTCCTACAATGAGCAGTTCTTC	peak5	M1_v2_0_F1	0	383	CD8
TGTGCCACCAGCAGGGGTGGACAGGGTGGTAATTCACCCCTCCACTTT	peak10	M1_v2_0_F1	0	384	CD8
TGTGCCACCAGCAGGTCAGGGGGCACTGAAGCTTTCTTT	peak10	M1_v2_0_F1	0	385	CD8
TGTGCCACCAGCAGGTCCAAAGCCTACGAGCAGTACTTC	peak0	M1_v2_0_F1	0	386	CD8
TGTGCCACCAGCAGGTTAGCGGGGGAACAAGAGACCCAGTACTTC	peak10	M1_v2_0_F1	1.2731e-06	387	CD8
TGTGCCACCAGCAGTAAACTTACGATTACGGAGCAGTTCTTC	peak45	M1_v2_0_F1	0	388	CD8
TGTGCCACCAGCAGTGCTCCGGGGCCTTACGAGCAGTACTTC	peak0	M1_v2_0_F1	0	389	CD8
TGTGCCACCAGCAGTGGGACAGCCTACGAGCAGTACTTC	peak10	M1_v2_0_F1	1.2731e-06	390	CD8
TGTGCCACCAGCATCCTGGAAATAGGGTCAGATACGCAGTATTTT	peak10	M1_v2_0_F1	0	391	CD8
TGTGCCACCAGCATGGCGAGCAATCAGCCCCAGCATTTT	peak45	M1_v2_0_F1	0	392	CD8
TGTGCCACCAGCCAGGGGGGGGCCTACGAGCAGTACTTC	peak15	M1_v2_0_F1	1.2731e-06	393	CD8
TGTGCCACCAGCCCCGACAGGGGGCCTTACGAGCAGTACTTC	peak0	M1_v2_0_F1	0	394	CD8
TGTGCCACCAGCCCCTCAGCAGGGGGCTATGGCTACACCTTC	peak5	M1_v2_0_F1	0	395	CD8
TGTGCCACCAGCCGAGGACAGAGCGGCTACAATGAGCAGTTCTTC	peak15	M1_v2_0_F1	0	396	CD8
TGTGCCACCAGCCGCGCAGGGGCCTACGAGCAGTACGTC	peak10	M1_v2_0_F1	0	397	CD8
TGTGCCACCAGCCGCGGGGACGGTACCTACGAGCAGTACGTC	peak15	M1_v2_0_F1	0	398	CD8
TGTGCCACCAGCCGTGGTGTAGGGTTTTACGAGCAGTACGTC	peak0	M1_v2_0_F1	0	399	CD8
TGTGCCACCAGCGCCAGCACAGGGCTTGAGCAGTTCTTC	peak10	M1_v2_0_F1	6.36552e-06	400	CD8
TGTGCCACCAGCGCCCAACAGGGAGCCGGGGAGCTGTTTTTT	peak0	M1_v2_0_F1	1.2731e-06	401	CD8
TGTGCCACCAGCGCTGGGCCGGAGATGTACGAGCAGTACTTC	peak0	M1_v2_0_F1	9.67559e-05	402	CD8
TGTGCCACCAGCGGACGGCCAGCCGACGAGCAGTACTTC	peak0	M1_v2_0_F1	0	403	CD8
TGTGCCACCAGCGGAGGGGGCGGGTACGAGCAGTACGTC	peak45	M1_v2_0_F1	0	404	CD8
TGTGCCACCAGCGGAGGGGTGGGTTACGAGCAGTACGTC	peak15	M1_v2_0_F1	1.2731e-06	405	CD8
TGTGCCACCAGCGGATCTACAGGTCAGCCCCAGCATTTT	peak45	M1_v2_0_F1	0	406	CD8
TGTGCCACCAGCGGGGCCACTGGGGGATATGAGCAGTTCTTC	peak0	M1_v2_0_F1	0	407	CD8
TGTGCCACCAGCGGGTCCGGCAACTACGAGCAGTACTTC	peak10	M1_v2_0_F1	1.52772e-05	408	CD8
TGTGCCACCAGCGTGACAGGGGGGAATTCACCCCTCCACTTT	peak15	M1_v2_0_F1	5.09241e-06	409	CD8
TGTGCCACCAGCTCCCGGGCAATGCCTGCCCTAGATACGCAGTATTTT	peak5	M1_v2_0_F1	0	410	CD8
TGTGCCACCAGTCCTGGTACGGCCTACGAGCAGTACTTC	peak0	M1_v2_0_F1	1.2731e-05	411	CD8
TGTGCCACCAGTCGGGGAGCAGATACGCAGTATTTT	peak5	M1_v2_0_F1	0	412	CD8
TGTGCCACCAGTGACAGCCAACTAGCGGGGGGCCACAATGAGCAGTTCTTC	peak10	M1_v2_0_F1	0	413	CD8
TGTGCCACCAGTGAGCCCGGGACAGCAGATACGCAGTATTTT	peak0	M1_v2_0_F1	0	414	CD8
TGTGCCACCAGTGATCCGGGACAGGGTGAGAATGAGCAGTTCTTC	peak5	M1_v2_0_F1	0	415	CD4
TGTGCCACCAGTGATTTCACTAGCACAGATACGCAGTATTTT	peak0	M1_v2_0_F1	0	416	CD8
TGTGCCACCAGTGGCCCCGACGAGGCTTCACCCCTCCACTTT	peak5	M1_v2_0_F1	0	417	CD8
TGTGCCACCAGTTATGAGAGGAACACTGAAGCTTTCTTT	peak10	M1_v2_0_F1	2.54621e-06	418	CD8
TGTGCCACCAGTTCCGGGGGGGCCCCCTACAATGAGCAGTTCTTC	peak45	M1_v2_0_F1	3.692e-05	419	CD8
TGTGCCACCCAGGGGGCAGCCGGGGAGCTGTTTTTT	peak45	M1_v2_0_F1	0	420	CD8
TGTGCCACCCCGACCGATACGCAGTATTTT	peak0	M1_v2_0_F1	0	421	CD8
TGTGCCACCCTAGCGGGGGGCAGCTACGAGCAGTACTTC	peak15	M1_v2_0_F1	0	422	CD8
TGTGCCACCGACCCGTGGAACACCGGGGAGCTGTTTTTT	peak5	M1_v2_0_F1	0	423	CD4
TGTGCCACCGCCCCGGGACAGGGTGTTTTTCATGAGCAGTTCTTC	peak15	M1_v2_0_F1	0	424	CD8
TGTGCCACCGCGATGGGGGCGGCTAACAATGAGCAGTTCTTC	peak0	M1_v2_0_F1	0	425	CD8
TGTGCCACCGGAGTCAGTGCGAAACCAGATACGCAGTATTTT	peak0	M1_v2_0_F1	0	426	CD8
TGTGCCACCTCAGGGGCGGGTAATCAGCCCCAGCATTTT	peak5	M1_v2_0_F1	0	427	CD4
TGTGCCACCTCAGGGGGTGGCAATCAGCCCCAGCATTTT	peak5	M1_v2_0_F1	0	428	CD4
TGTGCCACCTCTGGGGCCGCGTCCTACGAGCAGTACTTC	peak0	M1_v2_0_F1	0	429	CD8
TGTGCCACCTTCCCGCCGGAGTCTATCACAGATACGCAGTATTTT	peak5	M1_v2_0_F1	0	430	CD4
TGTGCCACGAGCGCCTCTACAGCCGATGAGCAGTTCTTC	peak10	M1_v2_0_F1	0	431	CD8
TGTGCCACTGGGATGTGGGGGAATGAGCAGTTCTTC	peak15	M1_v2_0_F1	0	432	CD8
TGTGCCACTTGCCCGGCAGCCAATCAGCCCCAGCATTTT	peak0	M1_v2_0_F1	0	433	CD8
TGTGCCAGACAGCCTAACTATGGCTACACCTTC	peak15	M1_v2_0_F1	0	434	CD8
TGTGCCAGAGTCGTCGGGAATACAGGGCCCCCCTTTGCAACTAATGAAAAACTGTTTTTT	peak5	M1_v2_0_F1	0	435	CD8
TGTGCCAGCAAAACAGGGGCTTCACCCCTCCACTTT	peak5	M1_v2_0_F1	0	436	CD4
TGTGCCAGCAAAATCGGGGGGGCGGCAGATACGCAGTATTTT	peak5	M1_v2_0_F1	0	437	CD4
TGTGCCAGCAAAGGACAGGGGGCGCTTAATGAGCAGTTCTTC	peak5	M1_v2_0_F1	0	438	CD4
TGTGCCAGCAAAGGACTAGCGGGGGCCCAAAGCTCCTACAATGAGCAGTTCTTC	peak0	M1_v2_0_F1	2.54621e-06	439	CD4
TGTGCCAGCAAAGTTATGGGGGCGGAGGATACGCAGTATTTT	peak5	M1_v2_0_F1	0	440	CD4
TGTGCCAGCAACCAAGCGGGGGGAGTGGCAGAGACCCAGTACTTC	peak0	M1_v2_0_F1	3.81931e-06	441	CD8
TGTGCCAGCAACCCCCCAGGCTACAATGAGCAGTTCTTC	peak10	M1_v2_0_F1	0	442	CD8
TGTGCCAGCAACCCCGCGGGGGGCGAGACCCAGTACTTC	peak5	M1_v2_0_F1	0	443	CD8
TGTGCCAGCAACCGCGGGGGGGCAAATGAGCAGTTCTTC	peak0	M1_v2_0_F1	5.09241e-06	444	CD8
TGTGCCAGCAACCTCCTCTCAGGGGGGATGAGAGATACGCAGTATTTT	peak5	M1_v2_0_F1	2.54621e-06	445	CD8
TGTGCCAGCAACGGGATACACACCGGGGAGCTGTTTTTT	peak0	M1_v2_0_F1	0	446	CD8
TGTGCCAGCAACTACCGACCCGGACAAGAGACCCAGTACTTC	peak10	M1_v2_0_F1	5.09241e-06	447	CD8
TGTGCCAGCAAGACAGGGGGGTTCGGGGAGCTGTTTTTT	peak10	M1_v2_0_F1	0	448	CD8
TGTGCCAGCAAGCCGGGACAGGACTACACCGGGGAGCTGTTTTTT	peak15	M1_v2_0_F1	0	449	CD8
TGTGCCAGCAAGGCCGGAAGGCTAGGAAACACCATATATTTT	peak15	M1_v2_0_F1	1.2731e-06	450	CD4
TGTGCCAGCAATACACAGGGGGGACCTGAAGCTTTCTTT	peak0	M1_v2_0_F1	0	451	CD8
TGTGCCAGCAATGCAGGGGCCGGGAACGAGCAGTACTTC	peak5	M1_v2_0_F1	0	452	CD8
TGTGCCAGCAATGGAGCGGGGGGATACGAGCAGTACTTC	peak10	M1_v2_0_F1	8.91173e-06	453	CD8
TGTGCCAGCACACAGGGACCAGAGACCGGGGAGCTGTTTTTT	peak0	M1_v2_0_F1	0	454	CD8
TGTGCCAGCACAGGACAGGGGGCCTACGAGCAGTACTTC	peak5	M1_v2_0_F1	0	455	CD8
TGTGCCAGCACCAAGAACTTGTGCAGGGGGACGAGCAGTACGTC	peak10	M1_v2_0_F1	0	456	CD8
TGTGCCAGCACCAGCACCGGGACAGGGGCCTATGGCTACACCTTC	peak10	M1_v2_0_F1	0	457	CD8
TGTGCCAGCACCCAAGGGGGGGCCCCCTACAATGAGCAGTTCTTC	peak15	M1_v2_0_F1	0	458	CD8
TGTGCCAGCACCCAGACCGGGGACACCATATATTTT	peak5	M1_v2_0_F1	0	459	CD8
TGTGCCAGCACCCAGGGGAACAGCAACATGAACACTGAAGCTTTCTTT	peak5	M1_v2_0_F1	0	460	CD4
TGTGCCAGCACCCCCGGGACAGAAAGCTACGAGCAGTACTTC	peak5	M1_v2_0_F1	1.2731e-06	461	CD8
TGTGCCAGCACCCCCTTTGGGACGGAAGAGACCCAGTACTTC	peak10	M1_v2_0_F1	0	462	CD4
TGTGCCAGCACCCCGGCCCCTAACACTGAAGCTTTCTTT	peak0	M1_v2_0_F1	2.54621e-06	463	CD8
TGTGCCAGCACCCCGGGACAGGGGTTCTATGAGCAGTTCTTC	peak45	M1_v2_0_F1	0	464	CD8
TGTGCCAGCACCCCGGGGCTGGAAAATTCACCCCTCCACTTT	peak5	M1_v2_0_F1	0	465	CD4
TGTGCCAGCACCCCGGGGGGCGGTCAGCCCCAGCATTTT	peak5	M1_v2_0_F1	0	466	CD8
TGTGCCAGCACCCGAGGAGGGTCAGGAATGAACACTGAAGCTTTCTTT	peak5	M1_v2_0_F1	0	467	CD8
TGTGCCAGCACCCGTCTCCCCGGTTTGGAGCAGTTCTTC	peak15	M1_v2_0_F1	0	468	CD8
TGTGCCAGCACCCTCGGCGCGGGAGGCACCTACGAGCAGTACTTC	peak45	M1_v2_0_F1	0	469	CD8
TGTGCCAGCACCGACAGGGGGTACGAGCAGTACTTC	peak45	M1_v2_0_F1	0	470	CD8
TGTGCCAGCACCGCCGGAGAAACTCATAGCAATCAGCCCCAGCATTTT	peak0	M1_v2_0_F1	0	471	CD4
TGTGCCAGCACCGTGGAGGGCGGTTACAATGAGCAGTTCTTC	peak0	M1_v2_0_F1	1.2731e-06	472	CD8
TGTGCCAGCACCTCCGGACAGGGAGTCTACGAGCAGTACGTC	peak10	M1_v2_0_F1	0	473	CD8
TGTGCCAGCACCTGGGAGGGGGAGCTGTTTTTT	peak0	M1_v2_0_F1	0	474	CD8
TGTGCCAGCACCTTCCTCGGGACAGTCGGAGGGACCCAGTACTTC	peak15	M1_v2_0_F1	0	475	CD4
TGTGCCAGCACCTTCGGACAGGGGGGTTCCTACAATGAGCAGTTCTTC	peak5	M1_v2_0_F1	0	476	CD4
TGTGCCAGCACCTTCGGGCAGGGGACGAGCTCCTACGAGCAGTACTTC	peak5	M1_v2_0_F1	1.01848e-05	477	CD4
TGTGCCAGCACCTTGGAAGGGTCACCCCTCCACTTT	peak5	M1_v2_0_F1	0	478	CD4
TGTGCCAGCACGACAGGGCTTACCTACAATGAGCAGTTCTTC	peak5	M1_v2_0_F1	0	479	CD8
TGTGCCAGCACGCTCCGGGGATCCGGGGCCAACGTCCTGACTTTC	peak15	M1_v2_0_F1	0	480	CD4
TGTGCCAGCACGGACGGGGCCCTTAATTCACCCCTCCACTTT	peak0	M1_v2_0_F1	0	481	CD8
TGTGCCAGCACGGTGGGAGGGGTGGCATACAATGAGCAGTTCTTC	peak45	M1_v2_0_F1	0	482	CD8
TGTGCCAGCACTGAGCGGGGGGGCTCCTACAATGAGCAGTTCTTC	peak5	M1_v2_0_F1	2.54621e-06	483	CD8
TGTGCCAGCAGAAAGACTAGCGGGGGATGGATGGAGCAGTACGTC	peak0	M1_v2_0_F1	0	484	CD8
TGTGCCAGCAGAAATATGAACACTGAAGCTTTCTTT	peak15	M1_v2_0_F1	1.2731e-06	485	CD4
TGTGCCAGCAGAAATGGCAGGAGCTCCTACAATGAGCAGTTCTTC	peak0	M1_v2_0_F1	0	486	CD4
TGTGCCAGCAGAAGACAGGGGGCACCTAATGAAAAACTGTTTTTT	peak0	M1_v2_0_F1	0	487	CD8
TGTGCCAGCAGACAACAGGATTCACCCCTCCACTTT	peak45	M1_v2_0_F1	0	488	CD4
TGTGCCAGCAGACACACTATACGAGGGGAGACCCAGTACTTC	peak45	M1_v2_0_F1	0	489	CD4
TGTGCCAGCAGACCACAACAGGGGAAGGGGTCCTACGAGCAGTACTTC	peak5	M1_v2_0_F1	1.2731e-06	490	CD8
TGTGCCAGCAGACCCCATGGCGGGGGGACCCCAGGTGAGCAGTTCTTC	peak5	M1_v2_0_F1	0	491	CD4
TGTGCCAGCAGACCCGGGACAGCGACCTACGAGCAGTACTTC	peak10	M1_v2_0_F1	0	492	CD4
TGTGCCAGCAGACCGGGATCTATTGATTCACCCCTCCACTTT	peak5	M1_v2_0_F1	1.2731e-06	493	CD4
TGTGCCAGCAGAGCAGGGGCCACAGATACGCAGTATTTT	peak10	M1_v2_0_F1	0	494	CD8
TGTGCCAGCAGAGCCACCCGTAACTATGGCTACACCTTC	peak5	M1_v2_0_F1	1.2731e-06	495	CD4
TGTGCCAGCAGAGGGACTAGCGGCTACAATGAGCAGTTCTTC	peak5	M1_v2_0_F1	0	496	CD8
TGTGCCAGCAGATACGGGACAGTCAACACCGGGGAGCTGTTTTTT	peak5	M1_v2_0_F1	0	497	CD4
TGTGCCAGCAGATCCGGGGGCCGGGGAGAGACCCAGTACTTC	peak0	M1_v2_0_F1	0	498	CD8
TGTGCCAGCAGATCTGAATCCGGGGGTGGTCAGCCCCAGCATTTT	peak0	M1_v2_0_F1	0	499	CD8
TGTGCCAGCAGATTTGGACAGGGGAGAGAAAACATTCAGTACTTC	peak5	M1_v2_0_F1	0	500	CD4
TGTGCCAGCAGCAAACAGGGCGAGAACACTGAAGCTTTCTTT	peak5	M1_v2_0_F1	0	501	CD4
TGTGCCAGCAGCAAACAGGGGGAGAACACTGAAGCTTTCTTT	peak5	M1_v2_0_F1	0	502	CD4
TGTGCCAGCAGCAAAGCCGACAGGAACAAAAACATTCAGTACTTC	peak10	M1_v2_0_F1	0	503	CD4
TGTGCCAGCAGCAAAGGACAGGCCTACGAGCAGTACTTC	peak15	M1_v2_0_F1	0	504	CD8
TGTGCCAGCAGCAACCCCGAGGAAGAGACCCAGTACTTC	peak0	M1_v2_0_F1	0	505	CD8
TGTGCCAGCAGCAATTCGTTAGACAGGGGCTATAATTCACCCCTCCACTTT	peak5	M1_v2_0_F1	0	506	CD4
TGTGCCAGCAGCACACAACAGCCCCTTGGTGTCGGGGAGCTGTTTTTT	peak10	M1_v2_0_F1	0	507	CD8
TGTGCCAGCAGCACCAGACTAGCGGGGGGCACAGATACGCAGTATTTT	peak5	M1_v2_0_F1	0	508	CD4
TGTGCCAGCAGCACCCGGGACAGGCTGAACACTGAAGCTTTCTTT	peak45	M1_v2_0_F1	0	509	CD8
TGTGCCAGCAGCACCGCCCAGAGGGGGGTTGAAGCTTTCTTT	peak5	M1_v2_0_F1	0	510	CD8
TGTGCCAGCAGCACCGGGGGGGTGCCGTACAATGAGCAGTTCTTC	peak15	M1_v2_0_F1	0	511	CD8
TGTGCCAGCAGCACTCAGGCTTACGAGCAGTACGTC	peak0	M1_v2_0_F1	0	512	CD4
TGTGCCAGCAGCAGAGGGACAGGGGCCTACGAGCAGTACTTC	peak10	M1_v2_0_F1	0	513	CD8
TGTGCCAGCAGCAGAGGGGAGGGGGCTTCCTACAATGAGCAGTTCTTC	peak0	M1_v2_0_F1	0	514	CD8
TGTGCCAGCAGCAGCAGCGGGGGGGCACCGGTCGTAGGGTTCTTC	peak0	M1_v2_0_F1	0	515	CD8
TGTGCCAGCAGCAGGGGTGGGGACAGGACGCACGAGCAGTACTTC	peak10	M1_v2_0_F1	0	516	CD8
TGTGCCAGCAGCATACAGGGAACCGGGGAGCTGTTTTTT	peak5	M1_v2_0_F1	0	517	CD4
TGTGCCAGCAGCATACCGACAGAAAACGGGGAGCTGTTTTTT	peak0	M1_v2_0_F1	1.2731e-06	518	CD4
TGTGCCAGCAGCATACCGACAGAGAACACTGAAGCTTTCTTT	peak15	M1_v2_0_F1	0	519	CD4
TGTGCCAGCAGCATACTAGCGGGGGGACTCTACGAGCAGTACTTC	peak0	M1_v2_0_F1	1.2731e-06	520	CD8
TGTGCCAGCAGCATACTAGCGGGGGGGAACAATGAGCAGTTCTTC	peak15	M1_v2_0_F1	0	521	CD8
TGTGCCAGCAGCATAGACGGCCTTCCCTACAATGAGCAGTTCTTC	peak10	M1_v2_0_F1	2.54621e-06	522	CD8
TGTGCCAGCAGCATAGGACTAGGAGGCACAAGTGAGCAGTTCTTC	peak10	M1_v2_0_F1	1.14579e-05	523	CD8
TGTGCCAGCAGCATCCTAGCGGGGGAAGCCTTAGACGAGCAGTACTTC	peak0	M1_v2_0_F1	0	524	CD8
TGTGCCAGCAGCATGACACCCAACAATGAGCAGTTCTTC	peak0	M1_v2_0_F1	0	525	CD8
TGTGCCAGCAGCATGGGAGTTCCGTACGAGCAGTACTTC	peak5	M1_v2_0_F1	0	526	CD8
TGTGCCAGCAGCCAAAATGTAGGACAGGGGACTGAAGCTTTCTTT	peak10	M1_v2_0_F1	0	527	CD8
TGTGCCAGCAGCCAAACCCTTTCAACCGTCTACGAGCAGTACTTC	peak45	M1_v2_0_F1	0	528	CD8
TGTGCCAGCAGCCAAACGACTAGCGGGCGGGAGCAGTACTTC	peak5	M1_v2_0_F1	0	529	CD4
TGTGCCAGCAGCCAAACTAGCGTTGCCTACGAGCAGTACTTC	peak10	M1_v2_0_F1	0	530	CD8
TGTGCCAGCAGCCAAATGGGGTACAATGAGCAGTTCTTC	peak15	M1_v2_0_F1	2.54621e-06	531	CD4
TGTGCCAGCAGCCAAGAACCGGAGACATACGGGCAGTTCTTC	peak45	M1_v2_0_F1	0	532	CD8
TGTGCCAGCAGCCAAGAAGGACCATCCCGCGAGCAGTACTTC	peak10	M1_v2_0_F1	0	533	CD8
TGTGCCAGCAGCCAAGAAGGCCGGGGAGCTTTCTTT	peak45	M1_v2_0_F1	0	534	CD8
TGTGCCAGCAGCCAAGAAGGGATAGCGCGAGAGCAGTACTTC	peak5	M1_v2_0_F1	0	535	CD8
TGTGCCAGCAGCCAAGAAGGTTCCGCGGGGTTGGAGACCCAGTACTTC	peak5	M1_v2_0_F1	1.2731e-06	536	CD8
TGTGCCAGCAGCCAAGAATCGACTAGCGGGGGGGTACCGAAGTACTTC	peak10	M1_v2_0_F1	0	537	CD8
TGTGCCAGCAGCCAAGACGAGGCCAGGGCTTTCTACTTC	peak45	M1_v2_0_F1	0	538	CD4
TGTGCCAGCAGCCAAGACGGGAGAAAACTGTTTTTT	peak5	M1_v2_0_F1	0	539	CD4
TGTGCCAGCAGCCAAGACGGGCGGCAGGAAGTCTTC	peak5	M1_v2_0_F1	3.81931e-06	540	CD4
TGTGCCAGCAGCCAAGACGGGTTGAAGCAGTTCTTC	peak5	M1_v2_0_F1	0	541	CD4
TGTGCCAGCAGCCAAGAGAACAGGGGGCCTTCACCCCTCCACTTT	peak5	M1_v2_0_F1	1.2731e-06	542	CD8
TGTGCCAGCAGCCAAGAGAGCACCAACTACAATGAGCAGTTCTTC	peak5	M1_v2_0_F1	0	543	CD8
TGTGCCAGCAGCCAAGAGAGGACCGTACCTTTACGAGCAGTACTTC	peak5	M1_v2_0_F1	0	544	CD8
TGTGCCAGCAGCCAAGAGGAGACACCCTGGTCGACCCAGTACTTC	peak45	M1_v2_0_F1	0	545	CD8
TGTGCCAGCAGCCAAGAGGATACAGGGAGTGCCAACGTCCTGACTTTC	peak45	M1_v2_0_F1	0	546	CD8
TGTGCCAGCAGCCAAGAGGGGCCAGGGACCCAGTACTTC	peak15	M1_v2_0_F1	0	547	CD4
TGTGCCAGCAGCCAAGAGTCAGTCTCCTACAATGAGCAGTTCTTC	peak0	M1_v2_0_F1	8.91173e-06	548	CD8
TGTGCCAGCAGCCAAGATATCTTCTATGGCTACACCTTC	peak45	M1_v2_0_F1	0	549	CD8
TGTGCCAGCAGCCAAGATCAGACAGGGGGCTATTATTCACCCCTCCACTTT	peak5	M1_v2_0_F1	0	550	CD4
TGTGCCAGCAGCCAAGATCCCGGACTAGCGACAGATACGCAGTATTTT	peak10	M1_v2_0_F1	1.2731e-06	551	CD8
TGTGCCAGCAGCCAAGATCCTAGCGGGGTACTACAAGAGACCCAGTACTTC	peak45	M1_v2_0_F1	0	552	CD8
TGTGCCAGCAGCCAAGATCGAGAGGAGATCTCCTATAATTCACCCCTCCACTTT	peak10	M1_v2_0_F1	1.2731e-06	553	CD4
TGTGCCAGCAGCCAAGATCGGGAGGGGGAGTTCTAATCAGCCCCAGCATTTT	peak10	M1_v2_0_F1	2.54621e-06	554	CD8
TGTGCCAGCAGCCAAGATCGGGGGGCGCTTGAGCAGTTCTTC	peak15	M1_v2_0_F1	0	555	CD8
TGTGCCAGCAGCCAAGATCTGTGGACTAGCGGACAGCAGTTCTTC	peak5	M1_v2_0_F1	0	556	CD4
TGTGCCAGCAGCCAAGATCTGTTGGGAATTTATGGCTACACCTTC	peak10	M1_v2_0_F1	0	557	CD8
TGTGCCAGCAGCCAAGATGACAGGGGGCTGTTTTTT	peak5	M1_v2_0_F1	0	558	CD4
TGTGCCAGCAGCCAAGATGGCAGGCGCTACACCTTC	peak5	M1_v2_0_F1	1.2731e-06	559	CD4
TGTGCCAGCAGCCAAGATGGGCGCGGAGCTTTCTTT	peak5	M1_v2_0_F1	0	560	CD4
TGTGCCAGCAGCCAAGATGGGCGGAGTCAGTTCTTC	peak5	M1_v2_0_F1	6.36552e-06	561	CD4
TGTGCCAGCAGCCAAGATGGGCGTCCTGAGACCCAGTACTTC	peak45	M1_v2_0_F1	3.81931e-06	562	CD4
TGTGCCAGCAGCCAAGATGGGGAGACCCAGTACTTC	peak45	M1_v2_0_F1	0	563	CD4
TGTGCCAGCAGCCAAGATGTGGCAGGGGGCTATGGCTACACCTTC	peak10	M1_v2_0_F1	2.54621e-06	564	CD8
TGTGCCAGCAGCCAAGATTATTACGCGGGGGGGCCTCAAGAGACCCAGTACTTC	peak45	M1_v2_0_F1	0	565	CD8
TGTGCCAGCAGCCAAGATTCCCCAGTCTACAATGAGCAGTTCTTC	peak10	M1_v2_0_F1	2.54621e-06	566	CD8
TGTGCCAGCAGCCAAGATTCGAGCGGGGACGACGAGCAGTACTTC	peak10	M1_v2_0_F1	0	567	CD8
TGTGCCAGCAGCCAAGATTCTGGGGCCAACGTCCTGACTTTC	peak10	M1_v2_0_F1	0	568	CD4
TGTGCCAGCAGCCAAGATTTGGGGACAGCTAGTCAGCCCCAGCATTTT	peak10	M1_v2_0_F1	0	569	CD4
TGTGCCAGCAGCCAAGCCACTGCGTACGAGCAGTACTTC	peak10	M1_v2_0_F1	0	570	CD8
TGTGCCAGCAGCCAAGCCGGGACAGCCTACGAGCAGTACTTC	peak15	M1_v2_0_F1	0	571	CD8
TGTGCCAGCAGCCAAGGAAACCGAGGAGGCTACGAGCAGTACTTC	peak45	M1_v2_0_F1	2.54621e-06	572	CD8
TGTGCCAGCAGCCAAGGACAGGGGGAAGAGACCCAGTACTTC	peak45	M1_v2_0_F1	0	573	CD8
TGTGCCAGCAGCCAAGGACAGGGGGCCTACGAGCAGTACTTC	peak45	M1_v2_0_F1	0	574	CD8
TGTGCCAGCAGCCAAGGAGCACTAGCGGGGGCCTACGAGCAGTACTTC	peak0	M1_v2_0_F1	0	575	CD8
TGTGCCAGCAGCCAAGGAGGGCAGATAGGCAATGAGCAGTTCTTC	peak5	M1_v2_0_F1	0	576	CD4
TGTGCCAGCAGCCAAGGATTTAGCGCCACAGTACTACACGAGACCCAGTACTTC	peak0	M1_v2_0_F1	0	577	CD4
TGTGCCAGCAGCCAAGGGGAGTACGAGCAGTACTTC	peak5	M1_v2_0_F1	0	578	CD8
TGTGCCAGCAGCCAAGGGGCGGCCTCATTCTGGGAGACCCAGTACTTC	peak10	M1_v2_0_F1	0	579	CD4
TGTGCCAGCAGCCAAGGGGCTACGTTCTCCTACGAGCAGTACTTC	peak45	M1_v2_0_F1	0	580	CD8
TGTGCCAGCAGCCAAGGGGGCTCTTCGCAGGCTTTCTTT	peak5	M1_v2_0_F1	0	581	CD8
TGTGCCAGCAGCCAAGGGTCTAGGGGTTATAATTCACCCCTCCACTTT	peak5	M1_v2_0_F1	0	582	CD4
TGTGCCAGCAGCCAAGGTTCGGGGGGCAATGGCTACACCTTC	peak5	M1_v2_0_F1	0	583	CD8
TGTGCCAGCAGCCAAGTAACCCCTGGCAGGGGGTACACAGATACGCAGTATTTT	peak5	M1_v2_0_F1	0	584	CD4
TGTGCCAGCAGCCAAGTAGCGGGGGGCAACAATGAGCAGTTCTTC	peak5	M1_v2_0_F1	1.2731e-06	585	CD8
TGTGCCAGCAGCCAAGTCGGGGGACAGAACACCGGGGAGCTGTTTTTT	peak5	M1_v2_0_F1	0	586	CD4
TGTGCCAGCAGCCAAGTGAATAGCGGGGGGCCCGGGGAGCTGTTTTTT	peak45	M1_v2_0_F1	1.2731e-06	587	CD8
TGTGCCAGCAGCCAAGTGGGGCAGGCGTTCTCTGGAAACACCATATATTTT	peak45	M1_v2_0_F1	2.54621e-06	588	CD4
TGTGCCAGCAGCCAAGTGTCCGGGGAGCTGTTTTTT	peak5	M1_v2_0_F1	0	589	CD4
TGTGCCAGCAGCCAATACCTCCCGGGACTAGCGGGGGTTGACTCCTACAATGAGCAGTTCTTC	peak15	M1_v2_0_F1	0	590	CD8
TGTGCCAGCAGCCACAGACAGGGTCCACTGAAGCTTTCTTT	peak45	M1_v2_0_F1	1.2731e-06	591	CD8
TGTGCCAGCAGCCACATCGGAAGGGGACCCAACTACGAGCAGTACTTC	peak10	M1_v2_0_F1	3.81931e-06	592	CD8
TGTGCCAGCAGCCACCCCGGGGCAGAACAGTTCTTC	peak0	M1_v2_0_F1	0	593	CD8
TGTGCCAGCAGCCACCGGGACAGGGGAGCGGAGACCCAGTACTTC	peak0	M1_v2_0_F1	0	594	CD8
TGTGCCAGCAGCCACGAGACAAACACTGAAGCTTTCTTT	peak15	M1_v2_0_F1	3.81931e-06	595	CD8
TGTGCCAGCAGCCACGAGACCCAAGAGACCCAGTACTTC	peak5	M1_v2_0_F1	2.54621e-06	596	CD8
TGTGCCAGCAGCCACGGACAAATGGGCCAGCCCCAGCATTTT	peak10	M1_v2_0_F1	0	597	CD8
TGTGCCAGCAGCCACGGCGGGGTGGCCTACGAGCAGTACTTC	peak15	M1_v2_0_F1	0	598	CD8
TGTGCCAGCAGCCACGGGGGAGCCTACGAGCAGTACTTC	peak10	M1_v2_0_F1	0	599	CD8
TGTGCCAGCAGCCACTACCCCGGGACAGGGAGCGATGGCTACACCTTC	peak15	M1_v2_0_F1	0	600	CD8
TGTGCCAGCAGCCAGACAGGGTCCCACGAGCAGTACTTC	peak5	M1_v2_0_F1	1.2731e-06	601	CD8
TGTGCCAGCAGCCAGGATGGACGGGTCCAAACCTTC	peak5	M1_v2_0_F1	0	602	CD4
TGTGCCAGCAGCCAGGGACAGGGGTCCTACGAGCAGTACTTC	peak15	M1_v2_0_F1	0	603	CD8
TGTGCCAGCAGCCAGGGACTAGCGGGGAGCTCCTACAATGAGCAGTTCTTC	peak5	M1_v2_0_F1	1.2731e-06	604	CD4
TGTGCCAGCAGCCAGGGCACAGATACGCAGTATTTT	peak5	M1_v2_0_F1	0	605	CD8
TGTGCCAGCAGCCAGGGCCCAGTTGCGAGCCCAGATACGCAGTATTTT	peak10	M1_v2_0_F1	0	606	CD8
TGTGCCAGCAGCCAGGGCGACAGGACGTACGAAGCTTTCTTT	peak10	M1_v2_0_F1	5.09241e-06	607	CD8
TGTGCCAGCAGCCAGGGGGAACGGCTCTACAATGAGCAGTTCTTC	peak10	M1_v2_0_F1	2.16428e-05	608	CD8
TGTGCCAGCAGCCAGGGGGGGGTGGACTCAGATACGCAGTATTTT	peak5	M1_v2_0_F1	0	609	CD4
TGTGCCAGCAGCCAGGGTTACTACAATGAGCAGTTCTTC	peak5	M1_v2_0_F1	0	610	CD4
TGTGCCAGCAGCCATACAGGGGTTAGCACTGAAGCTTTCTTT	peak0	M1_v2_0_F1	0	611	CD8
TGTGCCAGCAGCCATACAGGTTGGGAGTACTTC	peak5	M1_v2_0_F1	0	612	CD8
TGTGCCAGCAGCCATCCTTCGGGACTGGGGATTGGGGAGCAGTACGTC	peak0	M1_v2_0_F1	0	613	CD8
TGTGCCAGCAGCCATCGGACAGGGGGCGAGCAGTACTTC	peak15	M1_v2_0_F1	0	614	CD8
TGTGCCAGCAGCCATGACCGGGACAGGGCGACGAACGGCTATGGCTACACCTTC	peak0	M1_v2_0_F1	0	615	CD8
TGTGCCAGCAGCCATGACGATCAGCCCCAGCATTTT	peak5	M1_v2_0_F1	2.54621e-06	616	CD4
TGTGCCAGCAGCCATGAGACAGGGGGCACCGGGGAGCTGTTTTTT	peak45	M1_v2_0_F1	1.2731e-06	617	CD8
TGTGCCAGCAGCCATGGCAGTACAAGCAATCAGCCCCAGCATTTT	peak15	M1_v2_0_F1	0	618	CD8
TGTGCCAGCAGCCATGGGGACAGGGAAAATTCACCCCTCCACTTT	peak5	M1_v2_0_F1	0	619	CD4
TGTGCCAGCAGCCCAAATTTCGGGTCCTACGAGCAGTACTTC	peak5	M1_v2_0_F1	1.2731e-06	620	CD4
TGTGCCAGCAGCCCAAGGGACAGGGTACTGTACGAGCAGTACTTC	peak5	M1_v2_0_F1	6.36552e-06	621	CD8
TGTGCCAGCAGCCCAAGGGGGTTAGCGGGGGGGGTAAGCAATGAGCAGTTCTTC	peak5	M1_v2_0_F1	0	622	CD4
TGTGCCAGCAGCCCACAGACCGGGGAGCTGTTTTTT	peak5	M1_v2_0_F1	5.09241e-06	623	CD4
TGTGCCAGCAGCCCACAGGGCGACACTGAAGCTTTCTTT	peak0	M1_v2_0_F1	1.2731e-06	624	CD8
TGTGCCAGCAGCCCACAGGGCGCCTACGAGCAGTACTTC	peak5	M1_v2_0_F1	0	625	CD8
TGTGCCAGCAGCCCACCTTCGGGACTCAACACCGGGGAGCTGTTTTTT	peak15	M1_v2_0_F1	2.54621e-06	626	CD8
TGTGCCAGCAGCCCACGACAGGGGGCAGGGCCCCTCCACTTT	peak10	M1_v2_0_F1	0	627	CD8
TGTGCCAGCAGCCCACGGGACAGGCTTTTCTACGAGCAGTACTTC	peak15	M1_v2_0_F1	1.2731e-06	628	CD8
TGTGCCAGCAGCCCACGGGACAGGTTGAACACTGAAGCTTTCTTT	peak45	M1_v2_0_F1	0	629	CD8
TGTGCCAGCAGCCCACTGGCGGACCTCCTCTATGGCTACACCTTC	peak0	M1_v2_0_F1	0	630	CD4
TGTGCCAGCAGCCCAGACAGCGCCAGCCATGAAAAACTGTTTTTT	peak5	M1_v2_0_F1	1.2731e-06	631	CD4
TGTGCCAGCAGCCCAGACGCCGGGACAGCCTACGAGCAGTACTTC	peak45	M1_v2_0_F1	0	632	CD8
TGTGCCAGCAGCCCAGACTATCAACCCTACGAGCAGTACGTC	peak0	M1_v2_0_F1	0	633	CD4
TGTGCCAGCAGCCCAGAGAATAGCAATCAGCCCCAGCATTTT	peak15	M1_v2_0_F1	0	634	CD8
TGTGCCAGCAGCCCAGGACAGGACAGGCTGTACTTC	peak15	M1_v2_0_F1	0	635	CD4
TGTGCCAGCAGCCCAGGAGGGGCCACTGAAGCTTTCTTT	peak5	M1_v2_0_F1	1.2731e-06	636	CD8
TGTGCCAGCAGCCCAGGCGCGGGGGGCCAATACAATGAGCAGTTCTTC	peak45	M1_v2_0_F1	1.2731e-06	637	CD8
TGTGCCAGCAGCCCAGGGACTGACAGCTCTGGAAACACCATATATTTT	peak15	M1_v2_0_F1	0	638	CD8
TGTGCCAGCAGCCCAGGGGACAGACAATACAATGAGCAGTTCTTC	peak0	M1_v2_0_F1	0	639	CD8
TGTGCCAGCAGCCCAGGGGCAGGTGCTGAAGCTTTCTTT	peak0	M1_v2_0_F1	0	640	CD8
TGTGCCAGCAGCCCAGGGGGGGTGGGTTACAATGAGCAGTTCTTC	peak0	M1_v2_0_F1	2.54621e-06	641	CD8
TGTGCCAGCAGCCCATCAACTAGCGGGGCCTCCTACGAGCAGTACGTC	peak5	M1_v2_0_F1	6.36552e-06	642	CD8
TGTGCCAGCAGCCCATCCCTAGGGGGGGCATATGGCTACACCTTC	peak45	M1_v2_0_F1	1.2731e-06	643	CD8
TGTGCCAGCAGCCCCAACTACGATGGCTACACCTTC	peak10	M1_v2_0_F1	0	644	CD8
TGTGCCAGCAGCCCCAATCTACAGGGGGCGTGGGGCTACACCTTC	peak5	M1_v2_0_F1	1.2731e-06	645	CD8
TGTGCCAGCAGCCCCACCGGGGGCCAGCCCCAGCATTTT	peak0	M1_v2_0_F1	0	646	CD8
TGTGCCAGCAGCCCCACTTTCGTTGCTGGGGCCAACGTCCTGACTTTC	peak10	M1_v2_0_F1	1.2731e-06	647	CD8
TGTGCCAGCAGCCCCAGGGACAGACTGAACACTGAAGCTTTCTTT	peak15	M1_v2_0_F1	0	648	CD8
TGTGCCAGCAGCCCCATAAGCGGGGGGTACTACGAGCAGTACTTC	peak10	M1_v2_0_F1	1.2731e-06	650	CD8
TGTGCCAGCAGCCCCCACAGGGAACTATGGCTACACCTTC	peak15	M1_v2_0_F1	0	651	CD8
TGTGCCAGCAGCCCCCATAGCGGGGGGACTAGCACAGATACGCAGTATTTT	peak0	M1_v2_0_F1	0	652	CD8
TGTGCCAGCAGCCCCCATGGCGGGGCCGAGCAGTACTTC	peak10	M1_v2_0_F1	0	653	CD8
TGTGCCAGCAGCCCCCCCGCTGGGGGACAGGGGGCTTACGAGCAGTACTTC	peak5	M1_v2_0_F1	0	654	CD8
TGTGCCAGCAGCCCCCCGGGACAGGGGTTTTCCTCCTACGAGCAGTACTTC	peak10	M1_v2_0_F1	0	655	CD8
TGTGCCAGCAGCCCCCGAGACAGACTTAATTCACCCCTCCACTTT	peak0	M1_v2_0_F1	0	656	CD8
TGTGCCAGCAGCCCCCGAGACAGGCTCCACTACGAGCAGTACTTC	peak5	M1_v2_0_F1	3.81931e-06	657	CD8
TGTGCCAGCAGCCCCCGGACAGTAGATGAGCAGTTCTTC	peak10	M1_v2_0_F1	0	658	CD8
TGTGCCAGCAGCCCCCGGGACAGACTAAACACTGAAGCTTTCTTT	peak10	M1_v2_0_F1	1.90966e-05	659	CD8
TGTGCCAGCAGCCCCCGGGACAGACTGAACACTGAAGCTTTCTTT	peak5	M1_v2_0_F1	3.81931e-06	660	CD8
TGTGCCAGCAGCCCCCGGGACAGGCTAACCTACGAGCAGTACTTC	peak10	M1_v2_0_F1	3.81931e-06	661	CD8
TGTGCCAGCAGCCCCCGGGACAGGCTTAACACTGAAGCTTTCTTT	peak15	M1_v2_0_F1	5.09241e-06	662	CD8
TGTGCCAGCAGCCCCCGGGACAGGTTGAACACTGAAGCTTTCTTT	peak15	M1_v2_0_F1	1.2731e-06	663	CD8
TGTGCCAGCAGCCCCCGGGACCGATTGAACACTGAAGCTTTCTTT	peak15	M1_v2_0_F1	0	664	CD8
TGTGCCAGCAGCCCCGACGCTAGCGGGGGGTCTTACAATGAGCAGTTCTTC	peak5	M1_v2_0_F1	0	665	CD8
TGTGCCAGCAGCCCCGACTCTGGGGCCAACGTCCTGACTTTC	peak15	M1_v2_0_F1	0	666	CD4
TGTGCCAGCAGCCCCGCTAGGGGGGAGCAGTACTTC	peak0	M1_v2_0_F1	0	667	CD8
TGTGCCAGCAGCCCCGGACTAGCGGTGGATGAGACCCAGTACTTC	peak15	M1_v2_0_F1	1.2731e-06	669	CD8
TGTGCCAGCAGCCCCGGAGGGGAAGCCTATGGCTACACCTTC	peak5	M1_v2_0_F1	0	670	CD8
TGTGCCAGCAGCCCCGGCTCAGGGGGCCGCGGCTACACCTTC	peak10	M1_v2_0_F1	0	671	CD4
TGTGCCAGCAGCCCCGGGACAGCCTACGAGCAGTACTTC	peak5	M1_v2_0_F1	0	672	CD8
TGTGCCAGCAGCCCCGGGACAGCGAACACTGAAGCTTTCTTT	peak5	M1_v2_0_F1	0	673	CD8
TGTGCCAGCAGCCCCGGGACAGGAAGACTGTTTTTT	peak5	M1_v2_0_F1	0	674	CD4
TGTGCCAGCAGCCCCGGGACAGGGAACTATGGCTACACCTTC	peak10	M1_v2_0_F1	0	675	CD8
TGTGCCAGCAGCCCCGGGACAGGGGGCTACGAGCAGTACTTC	peak45	M1_v2_0_F1	3.81931e-06	676	CD8
TGTGCCAGCAGCCCCGGGACAGGGTACGAGCAGTACTTC	peak10	M1_v2_0_F1	0	677	CD8
TGTGCCAGCAGCCCCGGGACAGGTCTCAATCAGCCCCAGCATTTT	peak0	M1_v2_0_F1	0	678	CD8
TGTGCCAGCAGCCCCGGGACGGCTCAGCCGGCTGGAAACACCATATATTTT	peak5	M1_v2_0_F1	1.2731e-06	679	CD8
TGTGCCAGCAGCCCCGGGACGGTCTCCTACGAGCAGTACTTC	peak0	M1_v2_0_F1	3.81931e-06	680	CD8
TGTGCCAGCAGCCCCGGGGACAGGCTATACAATGAGCAGTTCTTC	peak10	M1_v2_0_F1	0	681	CD8
TGTGCCAGCAGCCCCGGGGACAGGTTATACAATGAGCAGTTCTTC	peak0	M1_v2_0_F1	1.2731e-06	682	CD8
TGTGCCAGCAGCCCCGGGGCAGGGGCCACCTACGAGCAGTACGTC	peak0	M1_v2_0_F1	8.91173e-06	683	CD8
TGTGCCAGCAGCCCCGGGGCGGCCTACGAGCAGTACTTC	peak10	M1_v2_0_F1	5.09241e-06	684	CD8
TGTGCCAGCAGCCCCGGGGGACAGGGGACCTATGGCTACACCTTC	peak0	M1_v2_0_F1	0	685	CD8
TGTGCCAGCAGCCCCGGGGGAGCCTACGAGCAGTACTTC	peak15	M1_v2_0_F1	1.2731e-06	686	CD8
TGTGCCAGCAGCCCCGGGTGGGCTAGCGGGGGGTCCTTCACAGATACGCAGTATTTT	peak5	M1_v2_0_F1	2.54621e-06	687	CD4
TGTGCCAGCAGCCCCGGTTGGGGAAACTATGGCTACACCTTC	peak5	M1_v2_0_F1	0	688	CD8
TGTGCCAGCAGCCCCTCAGGGGGTGCCTATGGCTACACCTTC	peak45	M1_v2_0_F1	0	689	CD8
TGTGCCAGCAGCCCCTTTTCAGGGGAGGATACGCAGTATTTT	peak5	M1_v2_0_F1	0	690	CD4
TGTGCCAGCAGCCCGAACCCCGGGGACAAGCTTTCTTT	peak10	M1_v2_0_F1	0	691	CD8
TGTGCCAGCAGCCCGACAGCTAACAATGAGCAGTTCTTC	peak0	M1_v2_0_F1	1.2731e-06	692	CD8
TGTGCCAGCAGCCCGACAGGGTTGAACACTGAAGCTTTCTTT	peak5	M1_v2_0_F1	0	693	CD4
TGTGCCAGCAGCCCGACTAGCACCGGGGAGCTGTTTTTT	peak5	M1_v2_0_F1	0	694	CD4
TGTGCCAGCAGCCCGGAATCTAGCGGGGGGGACAATGAGCAGTTCTTC	peak15	M1_v2_0_F1	1.2731e-06	695	CD8
TGTGCCAGCAGCCCGGACAGTAACACTGAAGCTTTCTTT	peak10	M1_v2_0_F1	0	696	CD4
TGTGCCAGCAGCCCGGACTTGATGGATACGCAGTATTTT	peak10	M1_v2_0_F1	0	697	CD4
TGTGCCAGCAGCCCGGCAACTAATGAAAAACTGTTTTTT	peak0	M1_v2_0_F1	0	698	CD4
TGTGCCAGCAGCCCGGCAGGGGGCTACGAGCAGTACGTC	peak15	M1_v2_0_F1	2.54621e-06	699	CD8
TGTGCCAGCAGCCCGGCCGACAGACTCACTGAAGCTTTCTTT	peak0	M1_v2_0_F1	0	700	CD8
TGTGCCAGCAGCCCGGCGAGGGCGTACGAGCAGTACTTC	peak0	M1_v2_0_F1	0	701	CD8
TGTGCCAGCAGCCCGGCGGGGGGGTACGAGCAGTACTTC	peak10	M1_v2_0_F1	0	702	CD8
TGTGCCAGCAGCCCGGCTAGCGCCGAGGGTTACGAGCAGTACTTC	peak15	M1_v2_0_F1	0	703	CD8
TGTGCCAGCAGCCCGGGACAGGGGGCCTACGAGCAGTACTTC	peak10	M1_v2_0_F1	3.81931e-06	704	CD8
TGTGCCAGCAGCCCGGGACCGGTAAACACTGAAGCTTTCTTT	peak5	M1_v2_0_F1	0	705	CD8
TGTGCCAGCAGCCCGGGACTAGCCTTTGAGACCCAGTACTTC	peak5	M1_v2_0_F1	0	706	CD4
TGTGCCAGCAGCCCGGGACTAGCTTACGAGCAGTACTTC	peak15	M1_v2_0_F1	0	707	CD8
TGTGCCAGCAGCCCGGGGCCCTACACAGATACGCAGTATTTT	peak5	M1_v2_0_F1	0	708	CD4
TGTGCCAGCAGCCCGGGGGAAGGAACGAACTATGGCTACACCTTC	peak0	M1_v2_0_F1	0	709	CD8
TGTGCCAGCAGCCCGGGGGAGGGGGCTCTCTACAATGAGCAGTTCTTC	peak15	M1_v2_0_F1	0	710	CD8
TGTGCCAGCAGCCCGGGGGATGGGCCCTACAATGAGCAGTTCTTC	peak10	M1_v2_0_F1	2.54621e-06	711	CD8
TGTGCCAGCAGCCCGGGGGGCCCTCTCTACAATGAGCAGTTCTTC	peak0	M1_v2_0_F1	1.2731e-06	712	CD8
TGTGCCAGCAGCCCGGGGGGGGCCTACGAGCAGTACTTC	peak5	M1_v2_0_F1	0	713	CD8
TGTGCCAGCAGCCCGTACCGGTACGGGGGGCAAGAGACCCAGTACTTC	peak5	M1_v2_0_F1	0	714	CD4
TGTGCCAGCAGCCCGTACGGGGCCTACGTAGATACGCAGTATTTT	peak5	M1_v2_0_F1	0	715	CD4
TGTGCCAGCAGCCCTAACCCCCATTTCTCCTATAATTCACCCCTCCACTTT	peak0	M1_v2_0_F1	0	716	CD8
TGTGCCAGCAGCCCTAGCGGGGCTCTAAATACGCAGTATTTT	peak5	M1_v2_0_F1	0	717	CD4
TGTGCCAGCAGCCCTAGGAGGACTAGCACAGATACGCAGTATTTT	peak5	M1_v2_0_F1	0	718	CD4
TGTGCCAGCAGCCCTCGGGACAGAATTAATTCACCCCTCCACTTT	peak0	M1_v2_0_F1	0	719	CD8
TGTGCCAGCAGCCCTCGGGACAGACTGAACACTGAAGCTTTCTTT	peak10	M1_v2_0_F1	1.2731e-06	720	CD8
TGTGCCAGCAGCCCTCGGTTAGCGGGGGGGGATGAGCAGTTCTTC	peak5	M1_v2_0_F1	0	721	CD4
TGTGCCAGCAGCCCTCTCAGCGGGGGGAACACCGGGGAGCTGTTTTTT	peak15	M1_v2_0_F1	0	722	CD8
TGTGCCAGCAGCCCTGCCCCCGCGTACGAGCAGTACTTC	peak10	M1_v2_0_F1	5.09241e-06	723	CD8
TGTGCCAGCAGCCCTGGCGGACGGATTTACAATGAGCAGTTCTTC	peak10	M1_v2_0_F1	2.54621e-06	724	CD8
TGTGCCAGCAGCCCTGGGGAGCGACTATACAATGAGCAGTTCTTC	peak5	M1_v2_0_F1	0	725	CD8
TGTGCCAGCAGCCCTGGGGGGCGCGGGGGGGCCTGGGATACGCAGTATTTT	peak45	M1_v2_0_F1	0	726	CD8
TGTGCCAGCAGCCCTGGTGGGACAGGGACCTACGAGCAGTACTTC	peak15	M1_v2_0_F1	0	727	CD8
TGTGCCAGCAGCCCTTATAATTCACCCCTCCACTTT	peak5	M1_v2_0_F1	0	728	CD4
TGTGCCAGCAGCCCTTATGATCAGCCCCAGCATTTT	peak0	M1_v2_0_F1	0	729	CD4
TGTGCCAGCAGCCGAACCGGGCCAAACACTGAAGCTTTCTTT	peak10	M1_v2_0_F1	1.2731e-06	730	CD8
TGTGCCAGCAGCCGAAGCGCAGCGGGGGGCACTAGCACAGATACGCAGTATTTT	peak0	M1_v2_0_F1	0	731	CD8
TGTGCCAGCAGCCGACAGGCGTCGGGGAACACTGAAGCTTTCTTT	peak5	M1_v2_0_F1	0	732	CD4
TGTGCCAGCAGCCGACAGGGAGGGTACGAGCAGTACTTC	peak15	M1_v2_0_F1	0	733	CD8
TGTGCCAGCAGCCGACAGGGGTTTCGCACTGAAGCTTTCTTT	peak45	M1_v2_0_F1	0	734	CD4
TGTGCCAGCAGCCGACCGGACACAAACACTGAAGCTTTCTTT	peak5	M1_v2_0_F1	1.2731e-06	735	CD4
TGTGCCAGCAGCCGACTGGGACGAACTAATGAAAAACTGTTTTTT	peak45	M1_v2_0_F1	0	736	CD4
TGTGCCAGCAGCCGAGGCCCGGGACAGGCCTACGAGCAGTACTTC	peak45	M1_v2_0_F1	0	737	CD8
TGTGCCAGCAGCCGAGGCCGGAACACTGAAGCTTTCTTT	peak45	M1_v2_0_F1	0	738	CD8
TGTGCCAGCAGCCGAGGGGAGGGGCGAAACTACAATGAGCAGTTCTTC	peak10	M1_v2_0_F1	0	739	CD8
TGTGCCAGCAGCCGAGGGTCGGTGAGAGAGCAGTACTTC	peak10	M1_v2_0_F1	0	740	CD8
TGTGCCAGCAGCCGATACGCCCGGGGGGGGCAGAACACCGGGGAGCTGTTTTTT	peak0	M1_v2_0_F1	0	741	CD4
TGTGCCAGCAGCCGCCCGCCGGGGGTCAGAGAGACCCAGTACTTC	peak45	M1_v2_0_F1	1.2731e-06	742	CD4
TGTGCCAGCAGCCGCCCTTGGGGCCTCTACAATGAGCAGTTCTTC	peak0	M1_v2_0_F1	0	743	CD4
TGTGCCAGCAGCCGCGACACAGATACGCAGTATTTT	peak5	M1_v2_0_F1	2.54621e-06	744	CD4
TGTGCCAGCAGCCGCGGCGGGGCACCCTACAATGAGCAGTTCTTC	peak10	M1_v2_0_F1	0	745	CD8
TGTGCCAGCAGCCGCGGGACTAGCGGACCCAATGAGCAGTTCTTC	peak5	M1_v2_0_F1	0	746	CD4
TGTGCCAGCAGCCGCTACCAAGAGACCCAGTACTTC	peak5	M1_v2_0_F1	0	747	CD4
TGTGCCAGCAGCCGGGACAGCTACACAGATACGCAGTATTTT	peak5	M1_v2_0_F1	0	748	CD4
TGTGCCAGCAGCCGGGACGGCTACGAGCAGTACTTC	peak45	M1_v2_0_F1	0	749	CD4
TGTGCCAGCAGCCGGGGAATTACCCAAACCTACGAGCAGTACTTC	peak5	M1_v2_0_F1	0	750	CD8
TGTGCCAGCAGCCGGGGATACAATGAGCAGTTCTTC	peak10	M1_v2_0_F1	0	751	CD8
TGTGCCAGCAGCCGGGGCCAGACCGAAGCTTTCTTT	peak0	M1_v2_0_F1	0	752	CD8
TGTGCCAGCAGCCGGGGGGAGGGGGCTTCCTACAATGAGCAGTTCTTC	peak0	M1_v2_0_F1	0	753	CD8
TGTGCCAGCAGCCGGTATAGCAATCAGCCCCAGCATTTT	peak5	M1_v2_0_F1	0	754	CD4
TGTGCCAGCAGCCGTAAACCGCCGGGACAGGTCCGGAACACCGGGGAGCTGTTTTTT	peak0	M1_v2_0_F1	0	755	CD8
TGTGCCAGCAGCCGTAAGACCGGGACAGACGAGCAGTACGTC	peak5	M1_v2_0_F1	0	756	CD4
TGTGCCAGCAGCCGTGACAGCGCCTACGAGCAGTACTTC	peak5	M1_v2_0_F1	7.63862e-06	757	CD8
TGTGCCAGCAGCCGTTCAGGACGGGAAGAGACCCAGTACTTC	peak45	M1_v2_0_F1	0	758	CD8
TGTGCCAGCAGCCTAAGCACAGATACGCAGTATTTT	peak5	M1_v2_0_F1	2.54621e-06	759	CD8
TGTGCCAGCAGCCTAATAGGACTAGCGGTTCAAGAGACCCAGTACTTC	peak0	M1_v2_0_F1	1.2731e-06	760	CD8
TGTGCCAGCAGCCTACAGGGATCTGGGGCCAACGTCCTGACTTTC	peak5	M1_v2_0_F1	0	762	CD8
TGTGCCAGCAGCCTACCAACTGAGAACACTGAAGCTTTCTTT	peak5	M1_v2_0_F1	0	763	CD4
TGTGCCAGCAGCCTAGACAGGGGGCGCGGCTACGAGCAGTACGTC	peak0	M1_v2_0_F1	1.2731e-06	764	CD8
TGTGCCAGCAGCCTAGGAGGGATCCCTGTCAATGAGCAGTTCTTC	peak15	M1_v2_0_F1	1.2731e-06	765	CD8
TGTGCCAGCAGCCTAGGAGGGGCCTACGAGCAGTACTTC	peak15	M1_v2_0_F1	8.91173e-06	766	CD8
TGTGCCAGCAGCCTAGGGACAGGGGAAGGCTACACCTTC	peak15	M1_v2_0_F1	0	767	CD4
TGTGCCAGCAGCCTCCCCGGGAGCTACGAGCAGTACTTC	peak10	M1_v2_0_F1	0	768	CD8
TGTGCCAGCAGCCTCCCGGGAGCAGATACGCAGTATTTT	peak5	M1_v2_0_F1	0	769	CD4
TGTGCCAGCAGCCTCCCTGACAGGGTCCCCGGGGAGCTGTTTTTT	peak15	M1_v2_0_F1	0	770	CD8
TGTGCCAGCAGCCTCCGGTCCTCAATGAGCAGTTCTTC	peak5	M1_v2_0_F1	3.81931e-06	771	CD4
TGTGCCAGCAGCCTCGATCGGCAAAGAAATGATACAGATACGCAGTATTTT	peak0	M1_v2_0_F1	0	772	CD8
TGTGCCAGCAGCCTCGGACAGAGCACCAGCAATCAGCCCCAGCATTTT	peak15	M1_v2_0_F1	0	773	CD8
TGTGCCAGCAGCCTCGGACAGGGGCCAACCTACGAGCAGTACGTC	peak5	M1_v2_0_F1	0.000202423	774	CD8
TGTGCCAGCAGCCTCGGGGGAACCGGGGAGCTGTTTTTT	peak0	M1_v2_0_F1	3.81931e-06	775	CD8
TGTGCCAGCAGCCTCTCCGGGACTAGCGGTCTTACACCGGGGAGCTGTTTTTT	peak0	M1_v2_0_F1	0	776	CD8
TGTGCCAGCAGCCTGACTAGCGGGGGTACAGATACGCAGTATTTT	peak5	M1_v2_0_F1	0	777	CD8
TGTGCCAGCAGCCTGCCCAGGAACACCGGGGAGCTGTTTTTT	peak5	M1_v2_0_F1	1.2731e-06	778	CD4
TGTGCCAGCAGCCTGGACATCGATCAGCCCCAGCATTTT	peak5	M1_v2_0_F1	1.2731e-06	779	CD8
TGTGCCAGCAGCCTGGCCGGGGAGCTGTTTTTT	peak10	M1_v2_0_F1	0	780	CD8
TGTGCCAGCAGCCTGGCTCCGGGCTCCTACGAGCAGTACTTC	peak10	M1_v2_0_F1	6.36552e-06	781	CD8
TGTGCCAGCAGCCTTCCCCCGGAGCGCACAGATACGCAGTATTTT	peak10	M1_v2_0_F1	0	782	CD8
TGTGCCAGCAGCCTTGACGGACACGCAACCTACAATGAGCAGTTCTTC	peak5	M1_v2_0_F1	1.2731e-06	783	CD4
TGTGCCAGCAGCCTTGGGACGGAAACTAACTATGGCTACACCTTC	peak10	M1_v2_0_F1	0	784	CD8
TGTGCCAGCAGCCTTGGGACTAGCGGGGTGTACGAGCAGTACTTC	peak5	M1_v2_0_F1	8.91173e-06	785	CD8
TGTGCCAGCAGCCTTGGGGGGACTAGCACGACGGATACGCAGTATTTT	peak5	M1_v2_0_F1	0	786	CD8
TGTGCCAGCAGCCTTTACACCGGGGAGCTGTTTTTT	peak5	M1_v2_0_F1	1.2731e-06	787	CD4
TGTGCCAGCAGCCTTTCAGGGTACAATGAGCAGTTCTTC	peak0	M1_v2_0_F1	0	788	CD8
TGTGCCAGCAGCGAAAAACTAGCGGGGTACAATGAGCAGTTCTTC	peak5	M1_v2_0_F1	0	789	CD4
TGTGCCAGCAGCGAAGCTTTGAACACTGAAGCTTTCTTT	peak5	M1_v2_0_F1	0	790	CD4
TGTGCCAGCAGCGACAGGACAGGGGCCCAGTACTTC	peak15	M1_v2_0_F1	0	791	CD4
TGTGCCAGCAGCGACCGGGACAGGACTAACTATGGCTACACCTTC	peak15	M1_v2_0_F1	0	792	CD8
TGTGCCAGCAGCGACCGGGACAGGCTCCTTAATACGCAGTATTTT	peak45	M1_v2_0_F1	7.63862e-06	793	CD8
TGTGCCAGCAGCGACGGACAGGCCTACAATGAGCAGTTCTTC	peak10	M1_v2_0_F1	0	794	CD8
TGTGCCAGCAGCGACGGACAGGGCCATGGCTACACCTTC	peak5	M1_v2_0_F1	1.2731e-06	795	CD4
TGTGCCAGCAGCGACTCGGAGACCCAGTACTTC	peak5	M1_v2_0_F1	1.2731e-06	796	CD4
TGTGCCAGCAGCGAGACAGGGCTCAATCAGCCCCAGCATTTT	peak5	M1_v2_0_F1	0	797	CD4
TGTGCCAGCAGCGAGAGCCTAGGGACGACGGGTGGCTACACCTTC	peak15	M1_v2_0_F1	1.2731e-06	798	CD8
TGTGCCAGCAGCGAGCCGGGACACCACGAGCAGTACTTC	peak15	M1_v2_0_F1	0	799	CD8
TGTGCCAGCAGCGAGGGACCTAACTACACTGAAGCTTTCTTT	peak5	M1_v2_0_F1	0	800	CD8
TGTGCCAGCAGCGAGGGACTAGCGGGGGGGCCGGCCGGGGAGCTGTTTTTT	peak15	M1_v2_0_F1	1.2731e-06	801	CD8
TGTGCCAGCAGCGAGGGCATCTCCTACAATGAGCAGTTCTTC	peak5	M1_v2_0_F1	1.2731e-06	802	CD8
TGTGCCAGCAGCGAGGGGACTAACTACAATGAGCAGTTCTTC	peak10	M1_v2_0_F1	0	803	CD8
TGTGCCAGCAGCGAGGGGGGGGTCCCCTACAATGAGCAGTTCTTC	peak5	M1_v2_0_F1	0	804	CD8
TGTGCCAGCAGCGAGGGTTCCCCCTACAATGAGCAGTTCTTC	peak45	M1_v2_0_F1	0	805	CD8
TGTGCCAGCAGCGAGTCCTACGAGCAGTACTTC	peak45	M1_v2_0_F1	0	806	CD8
TGTGCCAGCAGCGATAACTATGGCTACACCTTC	peak5	M1_v2_0_F1	1.2731e-06	807	CD4
TGTGCCAGCAGCGATCCGGGACAACCCAACAATGAGCAGTTCTTC	peak0	M1_v2_0_F1	0	808	CD8
TGTGCCAGCAGCGATGGGACAAACTCCTACGAGCAGTACTTC	peak15	M1_v2_0_F1	2.54621e-06	809	CD8
TGTGCCAGCAGCGCAGCCGGGAATCAGCCCCAGCATTTT	peak10	M1_v2_0_F1	0	810	CD8
TGTGCCAGCAGCGCAGGACTAGCGGGGGCAGATACGCAGTATTTT	peak0	M1_v2_0_F1	0	811	CD8
TGTGCCAGCAGCGCAGGGACAGGGTCCTACGAGCAGTACTTC	peak10	M1_v2_0_F1	7.63862e-06	812	CD8
TGTGCCAGCAGCGCCCGAGACAGGCTGAACACTGAAGCTTTCTTT	peak10	M1_v2_0_F1	0	813	CD8
TGTGCCAGCAGCGCCCGGGAGAGGCTCGGAGAGACCCAGTACTTC	peak15	M1_v2_0_F1	0	814	CD8
TGTGCCAGCAGCGCCCGTAACAGGGTGGTTGCCAAAAACATTCAGTACTTC	peak5	M1_v2_0_F1	0	815	CD4
TGTGCCAGCAGCGCCGACAGGGTGATCACCGGGGAGCTGTTTTTT	peak10	M1_v2_0_F1	0	816	CD8
TGTGCCAGCAGCGCCGAGGTGGCCGGGGAGCTGTTTTTT	peak5	M1_v2_0_F1	0	817	CD4
TGTGCCAGCAGCGCCGGACTAGAGCTGTACAATGAGCAGTTCTTC	peak5	M1_v2_0_F1	3.18276e-05	818	CD8
TGTGCCAGCAGCGCCGGACTATCTAGCCCCGTCGGGGTCGAGCAGTACTTC	peak0	M1_v2_0_F1	0	819	CD8
TGTGCCAGCAGCGCCGGACTCGCCGAGCAGTTCTTC	peak15	M1_v2_0_F1	0	820	CD8
TGTGCCAGCAGCGCCGGAGGCGGGCCATCCTACGAGCAGTACTTC	peak5	M1_v2_0_F1	1.2731e-06	821	CD8
TGTGCCAGCAGCGCCGGGACAGGCCTGTATAGCAATCAGCCCCAGCATTTT	peak0	M1_v2_0_F1	0	822	CD8
TGTGCCAGCAGCGCCGGGACAGGGGAGGGCAATCAGCCCCAGCATTTT	peak0	M1_v2_0_F1	0	823	CD8
TGTGCCAGCAGCGCCGGGACAGGGTACACTGAAGCTTTCTTT	peak0	M1_v2_0_F1	2.54621e-06	824	CD8
TGTGCCAGCAGCGCCGGGACCCCCTACAATGAGCAGTTCTTC	peak15	M1_v2_0_F1	7.63862e-06	825	CD8
TGTGCCAGCAGCGCCGGGGACAGACTATACGAGCAGTACTTC	peak0	M1_v2_0_F1	0	826	CD8
TGTGCCAGCAGCGCCGGGGGGGATGCTTATGGCTACACCTTC	peak0	M1_v2_0_F1	1.2731e-06	827	CD8
TGTGCCAGCAGCGCCGGGGGGGTCGGATACAATGAGCAGTTCTTC	peak45	M1_v2_0_F1	0	828	CD8
TGTGCCAGCAGCGCCTTGACGACAGCCACAGATACGCAGTATTTT	peak45	M1_v2_0_F1	0	829	CD4
TGTGCCAGCAGCGCGACAGGGGGCTCTCAGCCCCAGCATTTT	peak0	M1_v2_0_F1	0	830	CD4
TGTGCCAGCAGCGCGATGGGAACTGAAGCTTTCTTT	peak0	M1_v2_0_F1	0	831	CD4
TGTGCCAGCAGCGCGGACTCTGGGGCCAACGTCCTGACTTTC	peak10	M1_v2_0_F1	0	832	CD4
TGTGCCAGCAGCGCGGCGGGGGAGGCCTACGAGCAGTACTTC	peak5	M1_v2_0_F1	2.54621e-06	833	CD8
TGTGCCAGCAGCGCGGCTAGCGGGGGGGCGTACGAGCAGTACTTC	peak15	M1_v2_0_F1	2.54621e-06	834	CD8
TGTGCCAGCAGCGCGGGACAACAACCCCTCCCAAGAGCTTTCTTT	peak10	M1_v2_0_F1	1.2731e-06	835	CD8
TGTGCCAGCAGCGCGGGCGACGGATACCTCTACAATGAGCAGTTCTTC	peak5	M1_v2_0_F1	1.2731e-06	836	CD8
TGTGCCAGCAGCGCGGGCGGGGTCCCCTACAATGAGCAGTTCTTC	peak5	M1_v2_0_F1	0	837	CD8
TGTGCCAGCAGCGCTGGGGCACAACCGGTCAATGAGCAGTTCTTC	peak15	M1_v2_0_F1	3.81931e-06	838	CD8
TGTGCCAGCAGCGGAACCGGGGTGACTAGCGCCAAAGAGACCCAGTACTTC	peak5	M1_v2_0_F1	2.54621e-06	839	CD8
TGTGCCAGCAGCGGACAGGGGGCCTACGAGCAGTACTTC	peak15	M1_v2_0_F1	3.81931e-06	840	CD8
TGTGCCAGCAGCGGACAGGGGGCGTACGAGCAGTACTTC	peak15	M1_v2_0_F1	5.09241e-06	841	CD8
TGTGCCAGCAGCGGACTCCAAGAGACCCAGTACTTC	peak15	M1_v2_0_F1	0	842	CD4
TGTGCCAGCAGCGGCCGGACTAGCGGGGATGAGCAGTTCTTC	peak5	M1_v2_0_F1	0	843	CD8
TGTGCCAGCAGCGGCCGGGACAGGTTAAACTCACCCCTCCACTTT	peak15	M1_v2_0_F1	2.54621e-06	844	CD8
TGTGCCAGCAGCGGCCTGAGAGGGCCCAATGAGCAGTTCTTC	peak5	M1_v2_0_F1	0	845	CD8
TGTGCCAGCAGCGGCGAAAGGGCGCAAGTCGCAGAGACCCAGTACTTC	peak15	M1_v2_0_F1	0	846	CD8
TGTGCCAGCAGCGGGACGGCAGCCTACGAGCAGTACTTC	peak10	M1_v2_0_F1	0	847	CD8
TGTGCCAGCAGCGGGCTCTCCAAAAACATTCAGTACTTC	peak5	M1_v2_0_F1	8.91173e-06	848	CD4
TGTGCCAGCAGCGGGGGATCGGGCAATGAGCAGTTCTTC	peak0	M1_v2_0_F1	0	850	CD8
TGTGCCAGCAGCGGGGGCGTCTCCTACAATGAGCAGTTCTTC	peak45	M1_v2_0_F1	0	851	CD8
TGTGCCAGCAGCGGGGGGGCCCCCTACAATGAGCAGTTCTTC	peak0	M1_v2_0_F1	0	852	CD8
TGTGCCAGCAGCGGGGGGGCCCCTTACAATGAGCAGTTCTTC	peak0	M1_v2_0_F1	0	853	CD8
TGTGCCAGCAGCGGGGGGGGACTTCCCAATGAGCAGTTCTTC	peak10	M1_v2_0_F1	0	854	CD8
TGTGCCAGCAGCGGGGGGGTCTCCTACAATGAGCAGTTCTTC	peak5	M1_v2_0_F1	2.54621e-06	855	CD8
TGTGCCAGCAGCGGGGGTGGGGTACCCTACAATGAGCAGTTCTTC	peak0	M1_v2_0_F1	1.2731e-06	856	CD8
TGTGCCAGCAGCGGGTACCAAGAGACCCAGTACTTC	peak0	M1_v2_0_F1	7.63862e-06	857	CD4
TGTGCCAGCAGCGGTATAAATTCACCCCTCCACTTT	peak15	M1_v2_0_F1	0	858	CD4
TGTGCCAGCAGCGGTGGAATGGATACGCAGTATTTT	peak15	M1_v2_0_F1	2.54621e-06	859	CD8
TGTGCCAGCAGCGGTTCCGGGACAGGGTCGAGGTATGAGCAGTTCTTC	peak10	M1_v2_0_F1	0	860	CD8
TGTGCCAGCAGCGTAAGCGGGGGAGCTTACGAGCAGTACTTC	peak45	M1_v2_0_F1	0	861	CD8
TGTGCCAGCAGCGTACAGGATACTGAAGCTTTCTTT	peak10	M1_v2_0_F1	0	862	CD4
TGTGCCAGCAGCGTAGAAGGTTCACCCCTCCACTTT	peak15	M1_v2_0_F1	0	863	CD4
TGTGCCAGCAGCGTAGACCAAAGCACTGAAGCTTTCTTT	peak0	M1_v2_0_F1	1.2731e-06	864	CD8
TGTGCCAGCAGCGTAGACGGGAGCTCCTACAATGAGCAGTTCTTC	peak45	M1_v2_0_F1	0	865	CD8
TGTGCCAGCAGCGTAGAGGAAGGGAATGGCTACACCTTC	peak0	M1_v2_0_F1	0	866	CD4
TGTGCCAGCAGCGTAGAGGGCAGGGCGGCAGAGACCCAGTACTTC	peak5	M1_v2_0_F1	1.2731e-06	867	CD8
TGTGCCAGCAGCGTAGATAGCGGGGGGGCCTATGAGCAGTTCTTC	peak10	M1_v2_0_F1	0	868	CD8
TGTGCCAGCAGCGTAGATGCTGGGGCCAACGTCCTGACTTTC	peak0	M1_v2_0_F1	0	869	CD4
TGTGCCAGCAGCGTAGATGGTACGGGCCGTCCAGAGACCCAGTACTTC	peak15	M1_v2_0_F1	0	870	CD8
TGTGCCAGCAGCGTAGCCGCAGGGGCGAGCTATGGCTACACCTTC	peak5	M1_v2_0_F1	0	871	CD8
TGTGCCAGCAGCGTAGCGGGGGGGTCGGCCTATGGCTACACCTTC	peak45	M1_v2_0_F1	0	872	CD8
TGTGCCAGCAGCGTAGCTACGGGGGGGCTGGAGACCCAGTACTTC	peak45	M1_v2_0_F1	0	873	CD8
TGTGCCAGCAGCGTAGCTGGGGGCGCCTACGAGCAGTACTTC	peak45	M1_v2_0_F1	1.2731e-06	874	CD8
TGTGCCAGCAGCGTAGCTGGGGTCCCGGCCAATGAGCAGTTCTTC	peak15	M1_v2_0_F1	0	875	CD8
TGTGCCAGCAGCGTAGGAGGATCCCCCTACAATGAGCAGTTCTTC	peak15	M1_v2_0_F1	0	876	CD8
TGTGCCAGCAGCGTAGGAGGGGGACCGACCTACGAGCAGTACTTC	peak5	M1_v2_0_F1	2.92814e-05	877	CD8
TGTGCCAGCAGCGTAGGAGGGGGGACCTACGAGCAGTACTTC	peak10	M1_v2_0_F1	0	878	CD8
TGTGCCAGCAGCGTAGGAGGGGTCTCCTACAATGAGCAGTTCTTC	peak45	M1_v2_0_F1	0	879	CD8
TGTGCCAGCAGCGTAGGAGGGGTTTCCTACAATGAGCAGTTCTTC	peak10	M1_v2_0_F1	6.36552e-06	880	CD8
TGTGCCAGCAGCGTAGGCCAGGGGGCCCCCTACAATGAGCAGTTCTTC	peak45	M1_v2_0_F1	1.2731e-06	881	CD8
TGTGCCAGCAGCGTAGGCCTGGAGGCCTACGAGCAGTACTTC	peak5	M1_v2_0_F1	1.2731e-06	882	CD8
TGTGCCAGCAGCGTAGGCGGAGGGGTGGACTCCTACAATGAGCAGTTCTTC	peak10	M1_v2_0_F1	0	883	CD8
TGTGCCAGCAGCGTAGGCGGGACAAACTACAATGAGCAGTTCTTC	peak10	M1_v2_0_F1	2.54621e-06	884	CD8
TGTGCCAGCAGCGTAGGCGGGGCTCCATACAATGAGCAGTTCTTC	peak5	M1_v2_0_F1	0	885	CD8
TGTGCCAGCAGCGTAGGCGGGGTATCCTACAATGAGCAGTTCTTC	peak5	M1_v2_0_F1	0	886	CD8
TGTGCCAGCAGCGTAGGCGGGGTCCCCTACAATGAGCAGTTCTTC	peak0	M1_v2_0_F1	0	887	CD8
TGTGCCAGCAGCGTAGGCGGGGTCTCCTACAATGAGCAGTTCTTC	peak10	M1_v2_0_F1	3.81931e-06	888	CD8
TGTGCCAGCAGCGTAGGGAAGGGGACAGGGGCGGATGAGCAGTTCTTC	peak10	M1_v2_0_F1	0	889	CD8
TGTGCCAGCAGCGTAGGGCAGGGCTTAACCTACGAGCAGTACTTC	peak5	M1_v2_0_F1	2.16428e-05	890	CD8
TGTGCCAGCAGCGTAGGGGAACAGCCGAACACCGGGGAGCTGTTTTTT	peak0	M1_v2_0_F1	4.45586e-05	891	CD8
TGTGCCAGCAGCGTAGGGGACATCCAATATGAGCAGTTCTTC	peak0	M1_v2_0_F1	0	892	CD8
TGTGCCAGCAGCGTAGGGGGAACCGTATACAATGAGCAGTTCTTC	peak0	M1_v2_0_F1	0	893	CD8
TGTGCCAGCAGCGTAGGGGGAGTCTCCTACAATGAGCAGTTCTTC	peak5	M1_v2_0_F1	0	894	CD8
TGTGCCAGCAGCGTAGGGGGGACAGGCTACAATGAGCAGTTCTTC	peak45	M1_v2_0_F1	0	895	CD8
TGTGCCAGCAGCGTAGGGGGGGCGCCCTACAATGAGCAGTTCTTC	peak45	M1_v2_0_F1	0	896	CD8
TGTGCCAGCAGCGTAGGGGGGGCTGTCTACAATGAGCAGTTCTTC	peak10	M1_v2_0_F1	0	897	CD8
TGTGCCAGCAGCGTAGGGGGGGTCCCATACAATGAGCAGTTCTTC	peak0	M1_v2_0_F1	0	898	CD8
TGTGCCAGCAGCGTAGGGGGGGTCCCCTACAATGAGCAGTTCTTC	peak45	M1_v2_0_F1	0	899	CD8
TGTGCCAGCAGCGTAGGGGGGGTCTCCTACAATGAGCAGTTCTTC	peak45	M1_v2_0_F1	1.2731e-05	900	CD8
TGTGCCAGCAGCGTAGGGGGGGTTGGCTACAATGAGCAGTTCTTC	peak0	M1_v2_0_F1	0	901	CD8
TGTGCCAGCAGCGTAGGGTCCCCCTCCTACGAGCAGTACTTC	peak10	M1_v2_0_F1	1.2731e-06	902	CD8
TGTGCCAGCAGCGTAGGTGCAGGGGCAGCGAACACTGAAGCTTTCTTT	peak15	M1_v2_0_F1	5.09241e-06	903	CD8
TGTGCCAGCAGCGTAGGTGGGGTCTCCTACAATGAGCAGTTCTTC	peak0	M1_v2_0_F1	5.09241e-06	904	CD8
TGTGCCAGCAGCGTAGTCGGGACAGGGCTATTAGGTGAGCAGTTCTTC	peak0	M1_v2_0_F1	0	905	CD8
TGTGCCAGCAGCGTAGTTGCAGGGGATGGGGGTACGCAGTATTTT	peak45	M1_v2_0_F1	0	906	CD8
TGTGCCAGCAGCGTAGTTGGGGAGTCCTACGAGCAGTACTTC	peak45	M1_v2_0_F1	0	907	CD8
TGTGCCAGCAGCGTATCACAGGGAGGCACTGAAGCTTTCTTT	peak0	M1_v2_0_F1	0	908	CD8
TGTGCCAGCAGCGTATGAGGGGGCAGATCGAGGACGCAAAAACATTCAGTACTTC	peak10	M1_v2_0_F1	0	909	CD8
TGTGCCAGCAGCGTCCGGGACAGGATTAATTCACCCCTCCACTTT	peak5	M1_v2_0_F1	1.65503e-05	910	CD8
TGTGCCAGCAGCGTCGAAGGGGGTCCTCTTAGCAATCAGCCCCAGCATTTT	peak5	M1_v2_0_F1	0	911	CD8
TGTGCCAGCAGCGTCGGACTAGCGGGGGGGCCGGTGGGTGAGCAGTTCTTC	peak5	M1_v2_0_F1	0	912	CD8
TGTGCCAGCAGCGTCGGAGGGGTGGGATACAATGAGCAGTTCTTC	peak15	M1_v2_0_F1	0	913	CD8
TGTGCCAGCAGCGTCGGCGGGACCCCAACCTACGAGCAGTACTTC	peak5	M1_v2_0_F1	0	914	CD8
TGTGCCAGCAGCGTCGGGGGACAGGGCTACAATGAGCAGTTCTTC	peak10	M1_v2_0_F1	5.09241e-06	915	CD8
TGTGCCAGCAGCGTCTATTCTCGGGCTGAAGCTTTCTTT	peak15	M1_v2_0_F1	5.09241e-06	916	CD4
TGTGCCAGCAGCGTGGGAGGGGCCCCATACAATGAGCAGTTCTTC	peak15	M1_v2_0_F1	0	917	CD8
TGTGCCAGCAGCGTGGGCGGGGCCCCCTACAATGAGCAGTTCTTC	peak10	M1_v2_0_F1	0	918	CD8
TGTGCCAGCAGCGTGGGGACAGGGGGACCAGATACGCAGTATTTT	peak15	M1_v2_0_F1	0	919	CD4
TGTGCCAGCAGCGTGGGGGGGGCCCCCTACAATGAGCAGTTCTTC	peak5	M1_v2_0_F1	0	920	CD8
TGTGCCAGCAGCGTGGGGGGGGCCTTCTACAATGAGCAGTTCTTC	peak45	M1_v2_0_F1	3.81931e-06	921	CD8
TGTGCCAGCAGCGTTCAGGGGAACTCTGGGGCCAACGTCCTGACTTTC	peak5	M1_v2_0_F1	1.2731e-06	922	CD4
TGTGCCAGCAGCGTTGGAGGTCGTGAAGCTTTCTTT	peak10	M1_v2_0_F1	0	923	CD8
TGTGCCAGCAGCGTTGGGGGAGACGCCTACGAGCAGTACTTC	peak45	M1_v2_0_F1	0	924	CD8
TGTGCCAGCAGCGTTGGGGGAGTCCCCTACAATGAGCAGTTCTTC	peak5	M1_v2_0_F1	0	925	CD8
TGTGCCAGCAGCGTTGGGGGGACAGGGTACAATGAGCAGTTCTTC	peak5	M1_v2_0_F1	0	926	CD8
TGTGCCAGCAGCTACACTCCAATAAGCGGGGGGGCCAATGAGCAGTTCTTC	peak5	M1_v2_0_F1	0	927	CD8
TGTGCCAGCAGCTACCCCAACGGGGGTGCCCGAAACACCATATATTTT	peak5	M1_v2_0_F1	1.2731e-06	928	CD4
TGTGCCAGCAGCTACCCTCGACAGGGTGAGCAGTTCTTC	peak5	M1_v2_0_F1	1.2731e-06	929	CD4
TGTGCCAGCAGCTACGCAAATTCACCCCTCCACTTT	peak5	M1_v2_0_F1	0	930	CD4
TGTGCCAGCAGCTACGTTGGTAGAGAAGCTTTCTTT	peak0	M1_v2_0_F1	0	931	CD8
TGTGCCAGCAGCTATGGTTCGGGGAACACTGAAGCTTTCTTT	peak0	M1_v2_0_F1	3.81931e-06	932	CD8
TGTGCCAGCAGCTCACCACAGGGGGCTCAGCCCCAGCATTTT	peak5	M1_v2_0_F1	0	933	CD4
TGTGCCAGCAGCTCACGGGACAGACTGAACACTGAAGCTTTCTTT	peak5	M1_v2_0_F1	0	934	CD8
TGTGCCAGCAGCTCAGACTCATACACAGATACGCAGTATTTT	peak5	M1_v2_0_F1	0	935	CD4
TGTGCCAGCAGCTCAGGCCGCGGGTCAATCCACGAGCAGTACTTC	peak15	M1_v2_0_F1	0	936	CD4
TGTGCCAGCAGCTCCACCATACACAATCAGCCCCAGCATTTT	peak45	M1_v2_0_F1	0	937	CD8
TGTGCCAGCAGCTCCACTGTTGGGGAAAAACTGTTTTTT	peak10	M1_v2_0_F1	0	938	CD8
TGTGCCAGCAGCTCCCAAGGGGGCGTTGAAAAACTGTTTTTT	peak5	M1_v2_0_F1	2.54621e-06	939	CD4
TGTGCCAGCAGCTCCCAGGGGAGTGTAGTAGCTGAAGCTTTCTTT	peak15	M1_v2_0_F1	0	940	CD4
TGTGCCAGCAGCTCCCCCCCTGGCCAGGGGGACTATGGCTACACCTTC	peak10	M1_v2_0_F1	1.2731e-06	941	CD8
TGTGCCAGCAGCTCCCCCCGGGAGGGGCACAATGAGCAGTTCTTC	peak15	M1_v2_0_F1	0	942	CD8
TGTGCCAGCAGCTCCCCGATGGGTAGCGGGGAGGACAATGAGCAGTTCTTC	peak15	M1_v2_0_F1	1.2731e-06	943	CD8
TGTGCCAGCAGCTCCCGGGACAGGTTAAATTCACCCCTCCACTTT	peak15	M1_v2_0_F1	6.36552e-06	944	CD8
TGTGCCAGCAGCTCCCTACTAGCGGGGGTAACTAGCACAGATACGCAGTATTTT	peak10	M1_v2_0_F1	0	945	CD8
TGTGCCAGCAGCTCCGACAGGGGAGAGACCCAGTACTTC	peak0	M1_v2_0_F1	3.81931e-06	946	CD8
TGTGCCAGCAGCTCCGACGCTAATTCACCCCTCCACTTT	peak45	M1_v2_0_F1	0	947	CD4
TGTGCCAGCAGCTCCGCAGGGGAAACCGGGGAGCTGTTTTTT	peak15	M1_v2_0_F1	0	948	CD8
TGTGCCAGCAGCTCCGCCCTAGATGTCCCCTCCTGC	peak0	M1_v2_0_F1	0	949	CD8
TGTGCCAGCAGCTCCGGAGGCGTCTACGAGCAGTACTTC	peak0	M1_v2_0_F1	1.2731e-06	950	CD8
TGTGCCAGCAGCTCCGGGACAGGAGCCTACGAGCAGTACTTC	peak0	M1_v2_0_F1	0	951	CD8
TGTGCCAGCAGCTCCGGGACAGGGATCTACGAGCAGTACTTC	peak0	M1_v2_0_F1	2.54621e-06	952	CD8
TGTGCCAGCAGCTCCGGGACTAGCGCCTACAATGAGCAGTTCTTC	peak0	M1_v2_0_F1	0	953	CD8
TGTGCCAGCAGCTCCTACGGAAGAGGAGCTTTCTTT	peak5	M1_v2_0_F1	0	954	CD8
TGTGCCAGCAGCTCCTATACCCGGGGGCTGTTTTTT	peak15	M1_v2_0_F1	1.2731e-06	955	CD4
TGTGCCAGCAGCTCCTGGACTAGCGGGGGGACAGATACGCAGTATTTT	peak15	M1_v2_0_F1	0	956	CD4
TGTGCCAGCAGCTCGACTCATACTCCAGTAGCTTTCTTT	peak0	M1_v2_0_F1	0	957	CD8
TGTGCCAGCAGCTCGAGGGACACCTATGGCTACACCTTC	peak15	M1_v2_0_F1	0	958	CD8
TGTGCCAGCAGCTCGGACAGGGGTGGAACAGATACGCAGTATTTT	peak45	M1_v2_0_F1	0	959	CD8
TGTGCCAGCAGCTCGGATGGGGGCTATGGCTACACCTTC	peak0	M1_v2_0_F1	2.54621e-06	960	CD8
TGTGCCAGCAGCTCGGCGGGACAGACGTATCAGCCCCAGCATTTT	peak5	M1_v2_0_F1	1.2731e-06	961	CD4
TGTGCCAGCAGCTCGGCGGGCTACGAGCAGTACTTC	peak15	M1_v2_0_F1	0	962	CD8
TGTGCCAGCAGCTCGGGACAGAATAATAAGAGACCCAGTACTTC	peak45	M1_v2_0_F1	0	963	CD8
TGTGCCAGCAGCTCGGGACAGGAGCCACTGACTCGCTACGAGCAGTACTTC	peak15	M1_v2_0_F1	0	964	CD8
TGTGCCAGCAGCTCGGGACAGGTCCTCTCTGGGGCCAACGTCCTGACTTTC	peak0	M1_v2_0_F1	0	965	CD8
TGTGCCAGCAGCTCGGGACAGGTCTACAATGAGCAGTTCTTC	peak5	M1_v2_0_F1	0	966	CD4
TGTGCCAGCAGCTCGGGACAGGTTAATGGCTACACCTTC	peak0	M1_v2_0_F1	2.54621e-06	967	CD8
TGTGCCAGCAGCTCGGGACCGAGCTCCTATAATTCACCCCTCCACTTT	peak5	M1_v2_0_F1	0	968	CD4
TGTGCCAGCAGCTCGGGACTAGCGGGGGTCCTTAGCTCCTACAATGAGCAGTTCTTC	peak0	M1_v2_0_F1	1.2731e-06	969	CD8
TGTGCCAGCAGCTCGGGGACTAACACCGGGGAGCTGTTTTTT	peak0	M1_v2_0_F1	8.91173e-06	970	CD8
TGTGCCAGCAGCTCTCCAACGGGGGGCCACAATGAGCAGTTCTTC	peak45	M1_v2_0_F1	1.2731e-06	971	CD8
TGTGCCAGCAGCTCTCGGATAGAAGGCACTGAAGCTTTCTTT	peak15	M1_v2_0_F1	0	972	CD8
TGTGCCAGCAGCTCTTCCTTGACAGGCTCGGATGGTGGCTACACCTTC	peak15	M1_v2_0_F1	0	973	CD4
TGTGCCAGCAGCTGGACAGCTGAGCAGTTCTTC	peak5	M1_v2_0_F1	0	974	CD8
TGTGCCAGCAGCTGGACGAACACTGAAGCTTTCTTT	peak10	M1_v2_0_F1	0	975	CD8
TGTGCCAGCAGCTGGAGGGACAGGAACACCGGGGAGCTGTTTTTT	peak5	M1_v2_0_F1	0	976	CD4
TGTGCCAGCAGCTGGCCCGGAGGGGGCAATGAGCAGTTCTTC	peak45	M1_v2_0_F1	0	977	CD8
TGTGCCAGCAGCTGGCCTGGGACTAGCGGCTCTGGGGCCAACGTCCTGACTTTC	peak5	M1_v2_0_F1	0	978	CD8
TGTGCCAGCAGCTGGCGACAGGGTTGGGACGAGCAGTACTTC	peak0	M1_v2_0_F1	0	979	CD4
TGTGCCAGCAGCTGGGACAGATTGAACACCGGGGAGCTGTTTTTT	peak5	M1_v2_0_F1	0	980	CD4
TGTGCCAGCAGCTGGGCCTACGAGCAGTACTTC	peak0	M1_v2_0_F1	0	981	CD8
TGTGCCAGCAGCTGGGCTGGACGGGGCTACTTC	peak45	M1_v2_0_F1	0	982	CD8
TGTGCCAGCAGCTGGGGGCCCTCCTACGAGCAGTACTTC	peak5	M1_v2_0_F1	0	983	CD8
TGTGCCAGCAGCTGGGGGGGAAACTACAATGAGCAGTTCTTC	peak10	M1_v2_0_F1	0	984	CD8
TGTGCCAGCAGCTGGGGGGGAAGCACAGATACGCAGTATTTT	peak5	M1_v2_0_F1	0	985	CD4
TGTGCCAGCAGCTGGGGGTCTAGCACAGATACGCAGTATTTT	peak5	M1_v2_0_F1	0	986	CD4
TGTGCCAGCAGCTGGTTAGCGGGGGGAGGGGGAGAGACCCAGTACTTC	peak0	M1_v2_0_F1	0	987	CD8
TGTGCCAGCAGCTTAAAAGGCCGGAGACTAGCGGGCGAAAGCTCCTACGAGCAGTACTTC	peak10	M1_v2_0_F1	0	988	CD8
TGTGCCAGCAGCTTAAATCGGGGGACTAGCCATCCGGGGAATGAGCAGTTCTTC	peak15	M1_v2_0_F1	0	989	CD8
TGTGCCAGCAGCTTAACAAGAGGAGGAGGAGGCACCGGGGAGCTGTTTTTT	peak10	M1_v2_0_F1	0	990	CD8
TGTGCCAGCAGCTTAACGGGCTCCTACGAGCAGTACGTC	peak45	M1_v2_0_F1	0	991	CD8
TGTGCCAGCAGCTTAACTCATGGACAGGGGGAAAACATTCAGTACTTC	peak45	M1_v2_0_F1	5.09241e-06	992	CD4
TGTGCCAGCAGCTTAACTGGGCAGGGTAAGTTCTTC	peak45	M1_v2_0_F1	0	993	CD8
TGTGCCAGCAGCTTAAGACAGAGCACTGAAGCTTTCTTT	peak45	M1_v2_0_F1	0	994	CD8
TGTGCCAGCAGCTTAAGGTCTAGCGGGGGCGTTCCTTTT	peak5	M1_v2_0_F1	2.54621e-06	995	CD4
TGTGCCAGCAGCTTAATGACAGGGGATTCACCCCTCCACTTT	peak5	M1_v2_0_F1	2.54621e-06	996	CD4
TGTGCCAGCAGCTTAATGAGGGCAACAACTAATGAAAAACTGTTTTTT	peak0	M1_v2_0_F1	0	997	CD4
TGTGCCAGCAGCTTAATGATGGCGGAAGAGACCCAGTACTTC	peak5	M1_v2_0_F1	0	998	CD4
TGTGCCAGCAGCTTAATGCCCGACACGGAAGCTTTCTTT	peak5	M1_v2_0_F1	0	999	CD8
TGTGCCAGCAGCTTAATGGCTTCCCTGTCGCAAGAGACCCAGTACTTC	peak5	M1_v2_0_F1	0	1000	CD4
TGTGCCAGCAGCTTAATGGGCACCACAGATACGCAGTATTTT	peak5	M1_v2_0_F1	0	1001	CD4
TGTGCCAGCAGCTTACACGGGGCCGTTCAAGAGACCCAGTACTTC	peak0	M1_v2_0_F1	0	1003	CD8
TGTGCCAGCAGCTTACAGGGGACCTACAATGAGCAGTTCTTC	peak0	M1_v2_0_F1	0	1004	CD8
TGTGCCAGCAGCTTACAGGGGGCAGTTTACGAGCAGTACTTC	peak0	M1_v2_0_F1	0	1005	CD8
TGTGCCAGCAGCTTACAGGTCGCCGGCACAGATACGCAGTATTTT	peak10	M1_v2_0_F1	0	1006	CD8
TGTGCCAGCAGCTTACCGACGGAGAACACTGAAGCTTTCTTT	peak0	M1_v2_0_F1	3.81931e-06	1007	CD4
TGTGCCAGCAGCTTACTAGGGTCCGGGGAGCTGTTTTTT	peak0	M1_v2_0_F1	0	1008	CD8
TGTGCCAGCAGCTTACTCGGGGGGGCGGCAGATACGCAGTATTTT	peak5	M1_v2_0_F1	0	1009	CD4
TGTGCCAGCAGCTTACTGGACAGTTACAATGAGCAGTTCTTC	peak5	M1_v2_0_F1	0	1010	CD4
TGTGCCAGCAGCTTAGAACAGATAATGAACACTGAAGCTTTCTTT	peak10	M1_v2_0_F1	0	1011	CD8
TGTGCCAGCAGCTTAGAAGCCGGGAACACTGAAGCTTTCTTT	peak15	M1_v2_0_F1	0	1012	CD8
TGTGCCAGCAGCTTAGACACCCACACTGAAGCTTTCTTT	peak5	M1_v2_0_F1	0	1013	CD4
TGTGCCAGCAGCTTAGACGGGAGGACCGGGGAGCTGTTTTTT	peak5	M1_v2_0_F1	1.2731e-06	1014	CD4
TGTGCCAGCAGCTTAGACGGGGGAGGTTCACCCCTCCACTTT	peak0	M1_v2_0_F1	0	1015	CD4
TGTGCCAGCAGCTTAGAGCGGGGGCCATACTACGAGCAGTACTTC	peak45	M1_v2_0_F1	0	1016	CD8
TGTGCCAGCAGCTTAGAGGGACAGGGGTTCTTATCACCCCTCCACTTT	peak10	M1_v2_0_F1	0	1017	CD8
TGTGCCAGCAGCTTAGAGGGGGCCGTTTTTGCTGAAGCTTTCTTT	peak10	M1_v2_0_F1	0	1018	CD8
TGTGCCAGCAGCTTAGATGCGGATTCACCCCTCCACTTT	peak5	M1_v2_0_F1	0	1019	CD4
TGTGCCAGCAGCTTAGATGCTGGGGCCAACGTCCTGACTTTC	peak15	M1_v2_0_F1	0	1020	CD4
TGTGCCAGCAGCTTAGATTCTTCAGGGATGGGCAATCAGCCCCAGCATTTT	peak5	M1_v2_0_F1	0	1021	CD8
TGTGCCAGCAGCTTAGCAACGGGACCAGATACGCAGTATTTT	peak5	M1_v2_0_F1	0	1022	CD4
TGTGCCAGCAGCTTAGCAGCTTCCTCCTACAATGAGCAGTTCTTC	peak15	M1_v2_0_F1	0	1023	CD8
TGTGCCAGCAGCTTAGCAGGGGGGGGCGGGGGCTTCAATCAGCCCCAGCATTTT	peak0	M1_v2_0_F1	0	1024	CD8
TGTGCCAGCAGCTTAGCCCAGGCCTACGAGCAGTACGTC	peak10	M1_v2_0_F1	0	1025	CD8
TGTGCCAGCAGCTTAGCCCCCCTCCTGCAGGGTTTCGATGAGCAGTTCTTC	peak5	M1_v2_0_F1	0	1026	CD4
TGTGCCAGCAGCTTAGCGCAAGGTAGCTACGAGCAGTACTTC	peak10	M1_v2_0_F1	1.52772e-05	1027	CD8
TGTGCCAGCAGCTTAGCGCAGGGGTACTGGCAGCCCCAGCATTTT	peak10	M1_v2_0_F1	0	1028	CD4
TGTGCCAGCAGCTTAGCGCCTGAGGGGGGAAAACTGTTTTTT	peak0	M1_v2_0_F1	0	1029	CD8
TGTGCCAGCAGCTTAGCGCGGAGCACAGATACGCAGTATTTT	peak5	M1_v2_0_F1	3.81931e-06	1030	CD4
TGTGCCAGCAGCTTAGCGGGAGCCTACGAGCAGTACTTC	peak5	M1_v2_0_F1	6.36552e-06	1031	CD8
TGTGCCAGCAGCTTAGCTGAAAACTATGGCTACACCTTC	peak0	M1_v2_0_F1	0	1032	CD8
TGTGCCAGCAGCTTAGGACAGGGGGCGTCCATCGAGCAGTACTTC	peak0	M1_v2_0_F1	1.2731e-06	1033	CD8
TGTGCCAGCAGCTTAGGACAGGTTTACGAGCAGTACTTC	peak10	M1_v2_0_F1	2.54621e-06	1034	CD8
TGTGCCAGCAGCTTAGGACTAGGGGGCTACGAGCAGTACTTC	peak45	M1_v2_0_F1	0	1035	CD8
TGTGCCAGCAGCTTAGGAGAGAGTAAAGGCTCCTATAATTCACCCCTCCACTTT	peak5	M1_v2_0_F1	0	1036	CD4
TGTGCCAGCAGCTTAGGAGCAGTCACTGAAGCTTTCTTT	peak5	M1_v2_0_F1	1.2731e-06	1037	CD4
TGTGCCAGCAGCTTAGGAGGGGCTCCCTACAATGAGCAGTTCTTC	peak15	M1_v2_0_F1	0	1038	CD8
TGTGCCAGCAGCTTAGGCCTCAGGGTCGGGGAGCTGTTTTTT	peak10	M1_v2_0_F1	0	1039	CD8
TGTGCCAGCAGCTTAGGCGGGCACCCGGGCTACACCTTC	peak5	M1_v2_0_F1	0	1040	CD4
TGTGCCAGCAGCTTAGGCGGGGCCCCATACAATGAGCAGTTCTTC	peak5	M1_v2_0_F1	1.2731e-06	1041	CD8
TGTGCCAGCAGCTTAGGGACCAATCAGCCCCAGCATTTT	peak15	M1_v2_0_F1	0	1042	CD8
TGTGCCAGCAGCTTAGGGCAGACCCGAGGCTCCTATAATTCACCCCTCCACTTT	peak5	M1_v2_0_F1	0	1043	CD4
TGTGCCAGCAGCTTAGGGCAGGGGAAGGGCTCCTATAATTCACCCCTCCACTTT	peak5	M1_v2_0_F1	3.81931e-06	1044	CD4
TGTGCCAGCAGCTTAGGGCGGGCCTACGAGCAGTACGTC	peak15	M1_v2_0_F1	0	1045	CD8
TGTGCCAGCAGCTTAGGGGAGGGGGCCTCGTACAATGAGCAGTTCTTC	peak5	M1_v2_0_F1	2.54621e-06	1046	CD8
TGTGCCAGCAGCTTAGGGGGGGCCTGGTACAATGAGCAGTTCTTC	peak10	M1_v2_0_F1	1.2731e-06	1047	CD8
TGTGCCAGCAGCTTAGGTCAAGGGCAGCCCCAGCATTTT	peak0	M1_v2_0_F1	0	1048	CD4
TGTGCCAGCAGCTTAGGTGGGGTCACTGAAGCTTTCTTT	peak10	M1_v2_0_F1	0	1049	CD8
TGTGCCAGCAGCTTAGGTGGGTTCTACGAGCAGTACTTC	peak5	M1_v2_0_F1	0	1050	CD8
TGTGCCAGCAGCTTAGGTGTCGGGGGGCCCACAGATACGCAGTATTTT	peak0	M1_v2_0_F1	0	1051	CD8
TGTGCCAGCAGCTTAGTAATAGCGGGGGGGCAATTGCAGTTCTTC	peak45	M1_v2_0_F1	0	1052	CD8
TGTGCCAGCAGCTTAGTACTAGCGAACGCCAATGAGCAGTTCTTC	peak5	M1_v2_0_F1	0	1053	CD4
TGTGCCAGCAGCTTAGTAGGCGGTTCCTACGAGCAGTACTTC	peak10	M1_v2_0_F1	0	1054	CD8
TGTGCCAGCAGCTTAGTCAACTATGGCTACACCTTC	peak0	M1_v2_0_F1	1.2731e-06	1055	CD8
TGTGCCAGCAGCTTAGTGTCTAGCGGGGGGTTCTACAATGAGCAGTTCTTC	peak5	M1_v2_0_F1	0	1056	CD4
TGTGCCAGCAGCTTAGTTGACGCTGGAAACATTCAGTACTTC	peak5	M1_v2_0_F1	2.54621e-06	1057	CD4
TGTGCCAGCAGCTTAGTTGGGACAGGGAGCGTCCGCGGCACTGAAGCTTTCTTT	peak5	M1_v2_0_F1	1.2731e-06	1058	CD4
TGTGCCAGCAGCTTATACACAGGGGATAACGAGCAGTACTTC	peak0	M1_v2_0_F1	0	1059	CD8
TGTGCCAGCAGCTTATATAATCAGCCCCAGCATTTT	peak5	M1_v2_0_F1	2.54621e-06	1060	CD4
TGTGCCAGCAGCTTATCATCGTCCGCCGGGACCCAGTACTTC	peak15	M1_v2_0_F1	0	1061	CD4
TGTGCCAGCAGCTTATCCCTCGGGGGGCAATATAATGGCTACACCTTC	peak5	M1_v2_0_F1	0	1062	CD8
TGTGCCAGCAGCTTATCGACACCATATGAAGCTTTCTTT	peak15	M1_v2_0_F1	2.54621e-06	1063	CD8
TGTGCCAGCAGCTTATCGCAAGGGGACTATGGCTACACCTTC	peak15	M1_v2_0_F1	0	1064	CD8
TGTGCCAGCAGCTTATCGGCGGCGATGGCCTACGAGCAGTACTTC	peak0	M1_v2_0_F1	0	1065	CD4
TGTGCCAGCAGCTTATCGGTAGAGCAGCCCTTACCCTACGAGCAGTACTTC	peak10	M1_v2_0_F1	0	1066	CD8
TGTGCCAGCAGCTTATCTAGGGCCACTCAAGAGACCCAGTACTTC	peak0	M1_v2_0_F1	0	1067	CD4
TGTGCCAGCAGCTTATGGGCGCGGGCTAACAATGAGCAGTTCTTC	peak5	M1_v2_0_F1	0	1068	CD4
TGTGCCAGCAGCTTATGGGGGGATTCACCCCTCCACTTT	peak45	M1_v2_0_F1	1.2731e-06	1069	CD8
TGTGCCAGCAGCTTCACAGGAGGCAATCAGCCCCAGCATTTT	peak5	M1_v2_0_F1	0	1070	CD4
TGTGCCAGCAGCTTCACGGGGAGTGGAGATACGCAGTATTTT	peak5	M1_v2_0_F1	3.81931e-06	1071	CD4
TGTGCCAGCAGCTTCAGGGCGGGTGAGCAGTTCTTC	peak5	M1_v2_0_F1	1.01848e-05	1072	CD4
TGTGCCAGCAGCTTCCCAGGGTCCTACGAGCAGTACTTC	peak10	M1_v2_0_F1	0	1073	CD8
TGTGCCAGCAGCTTCCCCACAGGGGATGAGCAGTTCTTC	peak5	M1_v2_0_F1	0	1074	CD4
TGTGCCAGCAGCTTCCCGAACAATGAGCAGTTCTTC	peak15	M1_v2_0_F1	1.2731e-06	1075	CD8
TGTGCCAGCAGCTTCCCGGGACAGGGGAGGAGAGACCCAGTACTTC	peak5	M1_v2_0_F1	0	1076	CD8
TGTGCCAGCAGCTTCCGCAGGCCGACTCATGCCCCCCAATGAGCAGTTCTTC	peak5	M1_v2_0_F1	1.2731e-06	1077	CD8
TGTGCCAGCAGCTTCCGGGAACAGATCCAAGAGACCCAGTACTTC	peak5	M1_v2_0_F1	5.09241e-06	1078	CD4
TGTGCCAGCAGCTTCCGGGACGGCAGTCGGACCCAGTACTTC	peak10	M1_v2_0_F1	0	1079	CD4
TGTGCCAGCAGCTTCCTTACTCCGGGACAGGTTCACTCTGGAAACACCATATATTTT	peak15	M1_v2_0_F1	2.54621e-06	1080	CD8
TGTGCCAGCAGCTTCGGACACGGCTCTGGAAACACCATATATTTT	peak10	M1_v2_0_F1	0	1081	CD8
TGTGCCAGCAGCTTCGGACTAGCGGGGGTTTTTAGCACAGATACGCAGTATTTT	peak5	M1_v2_0_F1	0	1082	CD8
TGTGCCAGCAGCTTCGGGACGGTGAACACTGAAGCTTTCTTT	peak5	M1_v2_0_F1	0	1083	CD4
TGTGCCAGCAGCTTCGGGATCCCCTACGAGCAGTACTTC	peak0	M1_v2_0_F1	0	1084	CD8
TGTGCCAGCAGCTTCGGGGATTCACCCCTCCACTTT	peak45	M1_v2_0_F1	0	1085	CD4
TGTGCCAGCAGCTTCGGGTCCCTGAACACTGAAGCTTTCTTT	peak5	M1_v2_0_F1	0	1086	CD4
TGTGCCAGCAGCTTCGTGGCGGGGGGCCAAGAGACCCAGTACTTC	peak5	M1_v2_0_F1	0	1087	CD4
TGTGCCAGCAGCTTCTCAGGAAACTATGGCTACACCTTC	peak15	M1_v2_0_F1	0	1088	CD8
TGTGCCAGCAGCTTGAACAGCGGGGGGGCCGAGACCCAGTACTTC	peak45	M1_v2_0_F1	2.54621e-06	1089	CD4
TGTGCCAGCAGCTTGACAGGGAACAATGAGCAGTTCTTC	peak15	M1_v2_0_F1	0	1090	CD8
TGTGCCAGCAGCTTGACAGGGCAGGGCACTGAAGCTTTCTTT	peak45	M1_v2_0_F1	1.2731e-06	1091	CD8
TGTGCCAGCAGCTTGACTGGGGTCTACGAGCAGTACTTC	peak5	M1_v2_0_F1	0	1092	CD4
TGTGCCAGCAGCTTGCAGGTAGATACGCAGTATTTT	peak10	M1_v2_0_F1	1.2731e-06	1093	CD8
TGTGCCAGCAGCTTGCCCAGGGATGGCACTGAAGCTTTCTTT	peak45	M1_v2_0_F1	0	1094	CD4
TGTGCCAGCAGCTTGCCGACTGAGAACACTGAAGCTTTCTTT	peak5	M1_v2_0_F1	0	1095	CD4
TGTGCCAGCAGCTTGCCGAGAGGGGAGGCCTATGGCTACACCTTC	peak5	M1_v2_0_F1	0	1096	CD4
TGTGCCAGCAGCTTGCCGGGACGGAGTACGGGTAATGAGCAGTTCTTC	peak15	M1_v2_0_F1	0	1097	CD8
TGTGCCAGCAGCTTGGAACGAGGAAACACTGAAGCTTTCTTT	peak5	M1_v2_0_F1	0	1098	CD8
TGTGCCAGCAGCTTGGACGTAACCTACGAGCAGTACTTC	peak0	M1_v2_0_F1	0	1099	CD4
TGTGCCAGCAGCTTGGAGACAGATACGCAGTATTTT	peak5	M1_v2_0_F1	1.2731e-06	1100	CD8
TGTGCCAGCAGCTTGGAGACGAGCTCCTATAATTCACCCCTCCACTTT	peak5	M1_v2_0_F1	1.2731e-06	1101	CD4
TGTGCCAGCAGCTTGGAGGTTCTAGCGGGGGTGTACGAGCAGTACTTC	peak15	M1_v2_0_F1	3.81931e-06	1102	CD8
TGTGCCAGCAGCTTGGCACGGAACTATGGCTACACCTTC	peak5	M1_v2_0_F1	0	1103	CD4
TGTGCCAGCAGCTTGGCCATAGGGAGCTCCTACAATGAGCAGTTCTTC	peak10	M1_v2_0_F1	0	1104	CD4
TGTGCCAGCAGCTTGGCCCGGAACACTGAAGCTTTCTTT	peak5	M1_v2_0_F1	0	1105	CD4
TGTGCCAGCAGCTTGGGAGAGGTAGCCAAAAACATTCAGTACTTC	peak5	M1_v2_0_F1	0	1106	CD4
TGTGCCAGCAGCTTGGGCAGCCACTATGGCTACACCTTC	peak0	M1_v2_0_F1	2.54621e-06	1107	CD8
TGTGCCAGCAGCTTGGGGGCGGGTGCTGAGCAGTTCTTC	peak0	M1_v2_0_F1	0	1108	CD8
TGTGCCAGCAGCTTGGGGGGAGCTCCCTACAATGAGCAGTTCTTC	peak0	M1_v2_0_F1	0	1109	CD8
TGTGCCAGCAGCTTGGGGTGGTTACTGCAGTTCTTC	peak45	M1_v2_0_F1	0	1110	CD8
TGTGCCAGCAGCTTGGGGTTAGGGGGCTACGAGCAGTACTTC	peak10	M1_v2_0_F1	0	1111	CD8
TGTGCCAGCAGCTTGGGGTTGTCGGGCACAGGGGACCAAGAGACCCAGTACTTC	peak5	M1_v2_0_F1	1.2731e-06	1112	CD4
TGTGCCAGCAGCTTGGGTATCGGGCCCCTCCACTTT	peak15	M1_v2_0_F1	0	1113	CD8
TGTGCCAGCAGCTTGGTCCGGGGCGACGCTTATGGCTACACCTTC	peak5	M1_v2_0_F1	0	1114	CD4
TGTGCCAGCAGCTTGGTGGGGACAGGACGTACCTACGAGCAGTACTTC	peak15	M1_v2_0_F1	0	1115	CD8
TGTGCCAGCAGCTTGGTTGGGGCCGGGGAGACCCAGTACTTC	peak5	M1_v2_0_F1	0	1116	CD4
TGTGCCAGCAGCTTGTATAGAACAGGGGAGGATCAGCCCCAGCATTTT	peak5	M1_v2_0_F1	0	1117	CD4
TGTGCCAGCAGCTTGTCGGGACTAAATGAGCAGTTCTTC	peak0	M1_v2_0_F1	1.2731e-06	1118	CD8
TGTGCCAGCAGCTTGTCTGGGATAGGTGAGCAGTACTTC	peak0	M1_v2_0_F1	3.81931e-06	1119	CD8
TGTGCCAGCAGCTTTAACCTTATTCGAAACACCATATATTTT	peak0	M1_v2_0_F1	0	1120	CD8
TGTGCCAGCAGCTTTACAGGGAATGAGCAGTTCTTC	peak5	M1_v2_0_F1	0	1121	CD8
TGTGCCAGCAGCTTTAGCGGGGCGGGGGAGACCCAGTACTTC	peak5	M1_v2_0_F1	0	1122	CD4
TGTGCCAGCAGCTTTAGCGGGGGGGAGTACAATGAGCAGTTCTTC	peak5	M1_v2_0_F1	0	1123	CD8
TGTGCCAGCAGCTTTATGGGAAGTCGAGAAAAACTGTTTTTT	peak5	M1_v2_0_F1	2.54621e-06	1124	CD4
TGTGCCAGCAGCTTTCACGCGACTACTTACAATGAGCAGTTCTTC	peak45	M1_v2_0_F1	0	1125	CD4
TGTGCCAGCAGCTTTGAACTAGCCTACGAGCAGTACTTC	peak0	M1_v2_0_F1	2.54621e-06	1126	CD8
TGTGCCAGCAGCTTTGACCCTGCGTTTGATGCGGGGGGGCCCGACAGATACGCAGTATTTT	peak0	M1_v2_0_F1	0	1127	CD8
TGTGCCAGCAGCTTTGGACAGGGTATCCAAGAGACCCAGTACTTC	peak10	M1_v2_0_F1	0	1128	CD4
TGTGCCAGCAGCTTTTCAGGGGGGAGAGAGACCCAGTACTTC	peak5	M1_v2_0_F1	0	1129	CD4
TGTGCCAGCAGCTTTTCTCTCACTGAAGCTTTCTTT	peak15	M1_v2_0_F1	0	1130	CD4
TGTGCCAGCAGGACCCTAGGGAATGAGCAGTTCTTC	peak45	M1_v2_0_F1	0	1131	CD8
TGTGCCAGCAGGACGATAGCGGTCGCCTACGAGCAGTACTTC	peak10	M1_v2_0_F1	0	1132	CD8
TGTGCCAGCAGGACTAGCGGGGGAGAGACCCAGTACTTC	peak15	M1_v2_0_F1	0	1133	CD4
TGTGCCAGCAGGAGGGGGTATAGCAATCAGCCCCAGCATTTT	peak0	M1_v2_0_F1	0	1134	CD8
TGTGCCAGCAGGATACTAGCGGGGGTTCTCTACGAGCAGTACTTC	peak15	M1_v2_0_F1	3.81931e-06	1135	CD8
TGTGCCAGCAGGATAGCAGCAGATACGCAGTATTTT	peak10	M1_v2_0_F1	0	1136	CD8
TGTGCCAGCAGGATCGGGACTAGCGGGGGGTACGAGCAGTACTTC	peak10	M1_v2_0_F1	0	1137	CD8
TGTGCCAGCAGGATGGGGACTAGCGGGTTTTCGAACACCGGGGAGCTGTTTTTT	peak5	M1_v2_0_F1	0	1138	CD4
TGTGCCAGCAGGCAAAGCGCGGATACGCAGTATTTT	peak5	M1_v2_0_F1	1.2731e-06	1139	CD4
TGTGCCAGCAGGCAGGGGGTCGTCGCTGAAGCTTTCTTT	peak5	M1_v2_0_F1	0	1140	CD8
TGTGCCAGCAGGCGGGACACTGATACGCAGTATTTT	peak0	M1_v2_0_F1	0	1141	CD4
TGTGCCAGCAGGCGGGCAGTCTTCTACGAGCAGTACTTC	peak15	M1_v2_0_F1	2.54621e-06	1142	CD8
TGTGCCAGCAGGCGGGGGGTGGCTACAGATACGCAGTATTTT	peak10	M1_v2_0_F1	0	1143	CD8
TGTGCCAGCAGGCTGGGGGAATTGGGTCTTATCATCACAGATACGCAGTATTTT	peak15	M1_v2_0_F1	0	1144	CD8
TGTGCCAGCAGGCTTACTAGCGGGGGAGTCGGGGAGCTGTTTTTT	peak5	M1_v2_0_F1	0	1145	CD8
TGTGCCAGCAGGGACGGACTAGCGGGGAACCAAGAGACCCAGTACTTC	peak5	M1_v2_0_F1	0	1146	CD4
TGTGCCAGCAGGGCAACGACAGGGCTCGGAAACATTCAGTACTTC	peak45	M1_v2_0_F1	0	1147	CD4
TGTGCCAGCAGGGCGCGGACGATGACCAATGAGCAGTTCTTC	peak5	M1_v2_0_F1	0	1148	CD4
TGTGCCAGCAGGGCGGGGGTAGCCTACGAGCAGTACTTC	peak0	M1_v2_0_F1	1.2731e-06	1149	CD8
TGTGCCAGCAGGGGACAGGGGAACACTGAAGCTTTCTTT	peak45	M1_v2_0_F1	1.2731e-06	1150	CD8
TGTGCCAGCAGGGGCCCCGAGTGGGAGACCCAGTACTTC	peak0	M1_v2_0_F1	2.54621e-06	1151	CD4
TGTGCCAGCAGGGGGGGACAGGGCTACGAGCAGTACTTC	peak5	M1_v2_0_F1	1.2731e-06	1152	CD8
TGTGCCAGCAGGGGGGGGGGGTTGGATGAGCAGTTCTTC	peak45	M1_v2_0_F1	0	1153	CD8
TGTGCCAGCAGGGGGTCTGGCTATGGCTACACCTTC	peak5	M1_v2_0_F1	0	1155	CD4
TGTGCCAGCAGGGTTAGCGGGTCCCACGAGCAGTACGTC	peak10	M1_v2_0_F1	0	1156	CD8
TGTGCCAGCAGGTCCGGGACAGTTAACACCGGGGAGCTGTTTTTT	peak5	M1_v2_0_F1	1.2731e-06	1157	CD4
TGTGCCAGCAGGTGGACAGTTAATGAAAAACTGTTTTTT	peak5	M1_v2_0_F1	0	1158	CD4
TGTGCCAGCAGGTTAAGGGACAGGGGCTACGAGCAGTACTTC	peak0	M1_v2_0_F1	1.2731e-06	1159	CD8
TGTGCCAGCAGGTTAGGGGGGCGGCAGACGAACACCGGGGAGCTGTTTTTT	peak10	M1_v2_0_F1	0	1160	CD8
TGTGCCAGCAGGTTCGGGGAGGGGGTATCCGTAGCTTTCTTT	peak15	M1_v2_0_F1	0	1161	CD8
TGTGCCAGCAGTAACGGACGGAATCAGCCCCAGCATTTT	peak45	M1_v2_0_F1	0	1162	CD8
TGTGCCAGCAGTAAGCAGGGGGAAGCTGAAGCTTTCTTT	peak10	M1_v2_0_F1	0	1163	CD8
TGTGCCAGCAGTAAGGGGGGCGAAGCCTACGAGCAGTACTTC	peak5	M1_v2_0_F1	0	1164	CD8
TGTGCCAGCAGTAATGGGGAGATTTCCTACGAGCAGTACTTC	peak5	M1_v2_0_F1	0	1165	CD8
TGTGCCAGCAGTACACAAGTGGACACTGAAGCTTTCTTT	peak5	M1_v2_0_F1	0	1166	CD4
TGTGCCAGCAGTACAGGGGTCAGGGGAGAGCAGTACGTC	peak5	M1_v2_0_F1	1.2731e-06	1167	CD8
TGTGCCAGCAGTACCCTTCGGGGGGCCTCCTACAATGAGCAGTTCTTC	peak0	M1_v2_0_F1	0	1168	CD8
TGTGCCAGCAGTACCGCCATAGGCGGCTATGGCTACACCTTC	peak10	M1_v2_0_F1	0	1169	CD8
TGTGCCAGCAGTACCGGGCCCAATCAGCCCCAGCATTTT	peak5	M1_v2_0_F1	0	1170	CD8
TGTGCCAGCAGTAGACAGGGGGTGGAAGAGACCCAGTACTTC	peak10	M1_v2_0_F1	0	1171	CD8
TGTGCCAGCAGTAGCCTAGCGGGGGTTTATGAGCAGTTCTTC	peak0	M1_v2_0_F1	0	1172	CD8
TGTGCCAGCAGTAGCGGGGGTGTGGGCTACAATGAGCAGTTCTTC	peak5	M1_v2_0_F1	0	1173	CD8
TGTGCCAGCAGTAGGGCAGGGAGGGCCTACAATGAGCAGTTCTTC	peak5	M1_v2_0_F1	5.09241e-06	1174	CD4
TGTGCCAGCAGTATAGACACCAGCTCCTACAATGAGCAGTTCTTC	peak15	M1_v2_0_F1	1.2731e-06	1175	CD4
TGTGCCAGCAGTCAAACGCCTGGGTCTGGCTACACCTTC	peak45	M1_v2_0_F1	0	1176	CD4
TGTGCCAGCAGTCAACAGGGGAGCCACGAGCAGTACGTC	peak10	M1_v2_0_F1	0	1177	CD8
TGTGCCAGCAGTCAAGGGACAGTGTCCTACGAGCAGTACTTC	peak0	M1_v2_0_F1	1.2731e-06	1178	CD8
TGTGCCAGCAGTCACGGGGCTTCCTACGAGCAGTACGTC	peak0	M1_v2_0_F1	5.09241e-06	1179	CD8
TGTGCCAGCAGTCAGGGGATCTATGGCTACACCTTC	peak10	M1_v2_0_F1	0	1180	CD8
TGTGCCAGCAGTCCAGGGACAGCCTACGAGCAGTACTTC	peak5	M1_v2_0_F1	0	1181	CD8
TGTGCCAGCAGTCCCAGGGACAGGATTACCTACGAGCAGTACTTC	peak10	M1_v2_0_F1	0	1182	CD8
TGTGCCAGCAGTCCCAGGGTTGATGAAAAACTGTTTTTT	peak0	M1_v2_0_F1	0	1183	CD8
TGTGCCAGCAGTCCCCAAGGCGGGTACGAGCAGTACTTC	peak45	M1_v2_0_F1	0	1184	CD8
TGTGCCAGCAGTCCCCAAGTGCTAGGGAACTATGGCTACACCTTC	peak0	M1_v2_0_F1	0	1185	CD8
TGTGCCAGCAGTCCCCAGGACAGGCTGGGGCAGTACTTC	peak5	M1_v2_0_F1	0	1186	CD4
TGTGCCAGCAGTCCCCAGGGGACAGGGGCATACGAGCAGTACTTC	peak10	M1_v2_0_F1	0	1187	CD8
TGTGCCAGCAGTCCCCCCGGGACAGGGTCTGGAGATACTGAAGCTTTCTTT	peak0	M1_v2_0_F1	2.4189e-05	1188	CD8
TGTGCCAGCAGTCCCCGGGACGGGGGGAGAAACACTGAAGCTTTCTTT	peak5	M1_v2_0_F1	0	1189	CD4
TGTGCCAGCAGTCCCGGACAGGCCTACGAGCAGTACGTC	peak45	M1_v2_0_F1	0	1190	CD8
TGTGCCAGCAGTCCCGGGACAGCCTACGAGCAGTACTTC	peak5	M1_v2_0_F1	0	1191	CD8
TGTGCCAGCAGTCCCGGGACAGGGGGTTACGAGCAGTACTTC	peak15	M1_v2_0_F1	0	1192	CD8
TGTGCCAGCAGTCCCGGGACGGCTAATCAGCCCCAGCATTTT	peak0	M1_v2_0_F1	2.54621e-06	1193	CD8
TGTGCCAGCAGTCCCGGGACTGAAGAGCAGTTCTTC	peak0	M1_v2_0_F1	0	1194	CD8
TGTGCCAGCAGTCCCGGGCTAGCCTACGAGCAGTACGTC	peak15	M1_v2_0_F1	0	1195	CD8
TGTGCCAGCAGTCCCGTTTCCTTCAATCAGCCCCAGCATTTT	peak5	M1_v2_0_F1	1.2731e-06	1196	CD4
TGTGCCAGCAGTCCGACAGGGGCCTATGGCTACACCTTC	peak5	M1_v2_0_F1	0	1197	CD8
TGTGCCAGCAGTCCGACAGGGGGCTATAATTCACCCCTCCACTTT	peak10	M1_v2_0_F1	0	1198	CD8
TGTGCCAGCAGTCCGACTAGCGGGGGGACCTACGAGCAGTACGTC	peak45	M1_v2_0_F1	0	1199	CD8
TGTGCCAGCAGTCCGCCTTACTCTGGGGCCAACGTCCTGACTTTC	peak0	M1_v2_0_F1	0	1200	CD8
TGTGCCAGCAGTCCGGACAGCTACGAGCAGTACTTC	peak15	M1_v2_0_F1	1.2731e-06	1201	CD8
TGTGCCAGCAGTCCGGCCGGGGGGTGGTACACCTTC	peak5	M1_v2_0_F1	0	1202	CD4
TGTGCCAGCAGTCCGGGACAGAGGAGAGGTTTAAATCAGCCCCAGCATTTT	peak10	M1_v2_0_F1	1.2731e-06	1203	CD8
TGTGCCAGCAGTCCGGGACAGGGATCCTACGAGCAGTACGTC	peak15	M1_v2_0_F1	0	1204	CD8
TGTGCCAGCAGTCCGGGGACAGGGGCTTACGAGCAGTACTTC	peak10	M1_v2_0_F1	0	1205	CD8
TGTGCCAGCAGTCCGGGTCTCTCCTACGAGCAGTACGTC	peak15	M1_v2_0_F1	0	1206	CD8
TGTGCCAGCAGTCCGTCTCGTGGGGTTGGCGGAAACATTCAGTACTTC	peak15	M1_v2_0_F1	0	1207	CD4
TGTGCCAGCAGTCCTGACACGAGCTCCTACAATGAGCAGTTCTTC	peak5	M1_v2_0_F1	0	1208	CD4
TGTGCCAGCAGTCCTGGGACAGGGGGCTACGAGCAGTACGTC	peak5	M1_v2_0_F1	0	1209	CD8
TGTGCCAGCAGTCCTGGGCCGTGGGGTATTGCTTTCTTT	peak10	M1_v2_0_F1	1.2731e-06	1210	CD8
TGTGCCAGCAGTCGAGGGGGGAGTGGCTACACCTTC	peak10	M1_v2_0_F1	0	1211	CD8
TGTGCCAGCAGTCGATCCGGGACGGAGGCCTACGAGCAGTACTTC	peak0	M1_v2_0_F1	1.2731e-06	1212	CD8
TGTGCCAGCAGTCTACCAGGAGCGGGGGCCTCAGATACGCAGTATTTT	peak5	M1_v2_0_F1	0	1213	CD4
TGTGCCAGCAGTCTACCGGGACAGGGATTCAGCTCCTACGAGCAGTACTTC	peak5	M1_v2_0_F1	0	1214	CD8
TGTGCCAGCAGTCTCAGGGGGCCGGAGCAGTTCTTC	peak10	M1_v2_0_F1	0	1215	CD8
TGTGCCAGCAGTCTCCCAGGACAGGAGTACAAAACAGATACGCAGTATTTT	peak15	M1_v2_0_F1	1.2731e-06	1216	CD8
TGTGCCAGCAGTCTTTCCACGGTCGGATGGAACACTGAAGCTTTCTTT	peak5	M1_v2_0_F1	0	1217	CD8
TGTGCCAGCAGTGAAAACGGACAGACTGAAGCTTTCTTT	peak5	M1_v2_0_F1	0	1218	CD8
TGTGCCAGCAGTGAAAATGAAGGGAACTATGGCTACACCTTC	peak10	M1_v2_0_F1	0	1219	CD8
TGTGCCAGCAGTGAACCGGGACAAGGTTTTGCTTCCTACGAGCAGTACGTC	peak15	M1_v2_0_F1	0	1220	CD8
TGTGCCAGCAGTGAACGGGCGGGGGGGGTTGGAGATACGCAGTATTTT	peak10	M1_v2_0_F1	0	1221	CD8
TGTGCCAGCAGTGAACTCCCAGGGGTAGGTCTCTACGAGCAGTACTTC	peak0	M1_v2_0_F1	0	1222	CD8
TGTGCCAGCAGTGAAGAGGGTCTAGCGGGGACCGGGGAGCTGTTTTTT	peak45	M1_v2_0_F1	0	1223	CD8
TGTGCCAGCAGTGAAGCGCTTCCGGGGGCCTATGGCTACACCTTC	peak0	M1_v2_0_F1	0	1224	CD8
TGTGCCAGCAGTGAAGGAAGGAGTACCTATAATTCACCCCTCCACTTT	peak5	M1_v2_0_F1	0	1225	CD4
TGTGCCAGCAGTGAAGGCAGCGCCTACGAGCAGTACTTC	peak5	M1_v2_0_F1	0	1226	CD8
TGTGCCAGCAGTGAAGGGACGTGGGCTCGAATTGAAGCTTTCTTT	peak10	M1_v2_0_F1	1.2731e-06	1227	CD8
TGTGCCAGCAGTGAAGGGAGCAATAATGAAAAACTGTTTTTT	peak15	M1_v2_0_F1	0	1228	CD8
TGTGCCAGCAGTGAAGGGGATCCCTTCTATGGAGGCTACACCTTC	peak10	M1_v2_0_F1	0	1229	CD4
TGTGCCAGCAGTGAAGGGGTCAGAGGATTCACAGATACGCAGTATTTT	peak15	M1_v2_0_F1	0	1230	CD8
TGTGCCAGCAGTGAATCCAGCGAGTTCATCTATGGCTACACCTTC	peak15	M1_v2_0_F1	0	1231	CD8
TGTGCCAGCAGTGAATGGGGTCCGGGTGGCTACACCTTC	peak5	M1_v2_0_F1	1.2731e-06	1232	CD8
TGTGCCAGCAGTGACACGGGCGGGGGCACCACCGGGGAGCTGTTTTTT	peak5	M1_v2_0_F1	0	1233	CD4
TGTGCCAGCAGTGACAGGGAGGTCTATGGCTACACCTTC	peak15	M1_v2_0_F1	0	1234	CD8
TGTGCCAGCAGTGACCCGGGACTACAAGAGGGAGGAGAGACCCAGTACTTC	peak0	M1_v2_0_F1	0	1235	CD8
TGTGCCAGCAGTGACGGACAGGGGGCGTCCTATGGCTACACCTTC	peak0	M1_v2_0_F1	0	1236	CD8
TGTGCCAGCAGTGACGGTCCCTCCTACGAGCAGTACGTC	peak5	M1_v2_0_F1	0	1237	CD8
TGTGCCAGCAGTGACTCCCCGGGACTAGCCTACGAGCAGTACTTC	peak10	M1_v2_0_F1	0	1238	CD8
TGTGCCAGCAGTGAGCAAATCTATGGCTACACCTTC	peak0	M1_v2_0_F1	0	1239	CD8
TGTGCCAGCAGTGAGCACGGCAGAGGCTACACCTTC	peak0	M1_v2_0_F1	0	1240	CD8
TGTGCCAGCAGTGAGCAGGGGGCTTATGGCTACACCTTC	peak5	M1_v2_0_F1	0	1241	CD8
TGTGCCAGCAGTGAGGGACAGGGAAGCAATCAGCCCCAGCATTTT	peak0	M1_v2_0_F1	0	1242	CD8
TGTGCCAGCAGTGAGGGGACGGAGGCCTACGAGCAGTACTTC	peak10	M1_v2_0_F1	3.81931e-06	1243	CD8
TGTGCCAGCAGTGAGGGGGCCCCAAAGGGCTTC	peak5	M1_v2_0_F1	0	1244	CD4
TGTGCCAGCAGTGAGGGTGGCAGCTCCTATAATTCACCCCTCCACTTT	peak5	M1_v2_0_F1	0	1245	CD4
TGTGCCAGCAGTGATATATCTGAGAGTAGAGGCTACACCTTC	peak5	M1_v2_0_F1	0	1246	CD8
TGTGCCAGCAGTGATGGGACAGGGGGCGCCTATGGCTACACCTTC	peak10	M1_v2_0_F1	0	1247	CD8
TGTGCCAGCAGTGATGGGTCAGGACAGCCCCAGCATTTT	peak45	M1_v2_0_F1	0	1248	CD8
TGTGCCAGCAGTGATTACGTAGCTAATGAGCAGTTCTTC	peak0	M1_v2_0_F1	0	1249	CD8
TGTGCCAGCAGTGCAGGAGGGGCCTACGAGCAGTACTTC	peak10	M1_v2_0_F1	0	1250	CD8
TGTGCCAGCAGTGCAGTTTGGGATGAGCAGTTCTTC	peak45	M1_v2_0_F1	0	1252	CD4
TGTGCCAGCAGTGCCACACCGGGACAGCGCACAGATACGCAGTATTTT	peak0	M1_v2_0_F1	0	1253	CD4
TGTGCCAGCAGTGCCGCACCAGGGGATCGGAATGAGCAGTTCTTC	peak0	M1_v2_0_F1	8.91173e-06	1254	CD8
TGTGCCAGCAGTGCCGCAGGGGCCTACGAGCAGTACTTC	peak45	M1_v2_0_F1	1.2731e-06	1255	CD8
TGTGCCAGCAGTGCCGCCGGGACCCCTGCCTACGAGCAGTACTTC	peak10	M1_v2_0_F1	5.09241e-06	1256	CD8
TGTGCCAGCAGTGCCGGGTGGATCTCCTACGAGCAGTACTTC	peak15	M1_v2_0_F1	1.2731e-06	1257	CD8
TGTGCCAGCAGTGCGGGACAGAACGCCTACGAGCAGTACTTC	peak10	M1_v2_0_F1	0	1258	CD8
TGTGCCAGCAGTGCGGGACAGGCAGTCAACATTCAGTACTTC	peak0	M1_v2_0_F1	1.2731e-06	1259	CD4
TGTGCCAGCAGTGCGGGGGCTGGCCAGCCCCAGCATTTT	peak0	M1_v2_0_F1	0	1260	CD8
TGTGCCAGCAGTGCGGGGGTCCTTCAGCCCCAGCATTTT	peak15	M1_v2_0_F1	0	1261	CD8
TGTGCCAGCAGTGCGGTGTGGGATAATGAGCAGTTCTTC	peak5	M1_v2_0_F1	1.2731e-06	1262	CD4
TGTGCCAGCAGTGGACAGGGCTCCTACGAGCAGTACGTC	peak15	M1_v2_0_F1	1.2731e-06	1263	CD8
TGTGCCAGCAGTGGACAGGGGGCATATGAGCAGTTCTTC	peak5	M1_v2_0_F1	3.81931e-06	1264	CD8
TGTGCCAGCAGTGGACAGGGGGCCTACGAGCAGTACGTC	peak15	M1_v2_0_F1	0	1265	CD8
TGTGCCAGCAGTGGACAGGGGGCCTACGAGCAGTACTTC	peak45	M1_v2_0_F1	0	1266	CD8
TGTGCCAGCAGTGGACAGGGGGCTTATGAGCAGTTCTTC	peak10	M1_v2_0_F1	0	1267	CD8
TGTGCCAGCAGTGGACAGGGTATCGCCTACGAGCAGTACTTC	peak45	M1_v2_0_F1	0	1268	CD8
TGTGCCAGCAGTGGAGCAGGGGGCGCCTATGGCTACACCTTC	peak45	M1_v2_0_F1	0	1269	CD8
TGTGCCAGCAGTGGCGCCTACGAGCAGTACTTC	peak5	M1_v2_0_F1	0	1270	CD8
TGTGCCAGCAGTGGGACAGAGGCCTACGAGCAGTACTTC	peak0	M1_v2_0_F1	1.2731e-06	1271	CD8
TGTGCCAGCAGTGGGGACGGAAACAATGAGCAGTTCTTC	peak0	M1_v2_0_F1	0	1272	CD8
TGTGCCAGCAGTGGTTCTAGCGGGGGCACCTTAGATACGCAGTATTTT	peak5	M1_v2_0_F1	0	1273	CD4
TGTGCCAGCAGTGTACAAGGGGCCCAAGATACGCAGTATTTT	peak5	M1_v2_0_F1	0	1274	CD4
TGTGCCAGCAGTGTCACAAACACTGAAGCTTTCTTT	peak10	M1_v2_0_F1	0	1275	CD8
TGTGCCAGCAGTGTCACTCAGGTCGTCCAGCCCCAGCATTTT	peak0	M1_v2_0_F1	0	1276	CD8
TGTGCCAGCAGTGTGACAGGCGCCTACGAGCAGTACTTC	peak0	M1_v2_0_F1	0	1277	CD8
TGTGCCAGCAGTGTGGACCAGGGAGAAACAGATACGCAGTATTTT	peak5	M1_v2_0_F1	0	1278	CD4
TGTGCCAGCAGTGTGGGACCTGACACTGAAGCTTTCTTT	peak0	M1_v2_0_F1	0	1279	CD8
TGTGCCAGCAGTGTGGTAGGGACAGGGGCCTACGAGCAGTACGTC	peak10	M1_v2_0_F1	1.2731e-06	1280	CD8
TGTGCCAGCAGTGTTCGGGGAGGGAATGAGCAGTTCTTC	peak15	M1_v2_0_F1	0	1281	CD8
TGTGCCAGCAGTGTTGGGGTGAACACTGAAGCTTTCTTT	peak5	M1_v2_0_F1	1.2731e-06	1282	CD4
TGTGCCAGCAGTTACACAGGGGCCTACGAGCAGTACGTC	peak45	M1_v2_0_F1	0	1283	CD8
TGTGCCAGCAGTTACACGGTTAACAATGAGCAGTTCTTC	peak0	M1_v2_0_F1	0	1284	CD8
TGTGCCAGCAGTTACAGGGGAGGCACTGAAGCTTTCTTT	peak10	M1_v2_0_F1	0	1285	CD8
TGTGCCAGCAGTTACCCAGGGGTCCAAGAGACCCAGTACTTC	peak45	M1_v2_0_F1	0	1286	CD4
TGTGCCAGCAGTTACCCCGGGACGGCCTATGGCTACACCTTC	peak5	M1_v2_0_F1	0	1287	CD8
TGTGCCAGCAGTTACCCGAATCAGCCCCAGCATTTT	peak5	M1_v2_0_F1	0	1288	CD8
TGTGCCAGCAGTTACCCGGGACAGGCTTTCCTTTCTTACGAGCAGTACTTC	peak5	M1_v2_0_F1	7.63862e-06	1289	CD8
TGTGCCAGCAGTTACCCGGGACAGGGGCTAAGCTCCTACGAGCAGTACTTC	peak10	M1_v2_0_F1	0	1290	CD8
TGTGCCAGCAGTTACCCGGGACAGGGGTACTCAACCTACGAGCAGTACTTC	peak5	M1_v2_0_F1	0	1291	CD8
TGTGCCAGCAGTTACCCTGGACAGGGGTTTTTATCCTACGAGCAGTACTTC	peak5	M1_v2_0_F1	0	1292	CD8
TGTGCCAGCAGTTACCGGGACGCCGGCTACGAGCAGTACTTC	peak0	M1_v2_0_F1	0	1293	CD4
TGTGCCAGCAGTTACCTACAGACCGCCAACTACGAGCAGTACTTC	peak0	M1_v2_0_F1	3.81931e-06	1294	CD8
TGTGCCAGCAGTTACCTACTAGTTGAGCAGTTCTTC	peak0	M1_v2_0_F1	0	1295	CD8
TGTGCCAGCAGTTACGACAGAGGAGAGACCCAGTACTTC	peak45	M1_v2_0_F1	1.2731e-06	1296	CD8
TGTGCCAGCAGTTACGACAGGGGGGAGACCCAGTACTTC	peak10	M1_v2_0_F1	0	1297	CD8
TGTGCCAGCAGTTACGACAGGGGTGAGACCCAGTACTTC	peak5	M1_v2_0_F1	1.2731e-06	1298	CD8
TGTGCCAGCAGTTACGGGACAGCGTATGGCTACACCTTC	peak0	M1_v2_0_F1	1.2731e-06	1299	CD8
TGTGCCAGCAGTTACGGGGACAGCTACGAGCAGTACTTC	peak5	M1_v2_0_F1	0	1300	CD8
TGTGCCAGCAGTTACGGGGGGGCCCGGATAGATACGCAGTATTTT	peak5	M1_v2_0_F1	0	1301	CD4
TGTGCCAGCAGTTACGGGGTCTCGGGACAGTTCTATGGCTACACCTTC	peak5	M1_v2_0_F1	1.2731e-06	1302	CD8
TGTGCCAGCAGTTACGTATCTACAGGGGGAACTGAAAAACTGTTTTTT	peak10	M1_v2_0_F1	0	1303	CD8
TGTGCCAGCAGTTACTCAACCACAGGGGGCGCAAACACTGAAGCTTTCTTT	peak10	M1_v2_0_F1	0	1304	CD8
TGTGCCAGCAGTTACTCAGGGACTTCTGGGACCCAGTACTTC	peak5	M1_v2_0_F1	0	1305	CD4
TGTGCCAGCAGTTACTCATTCACAGGGGCTGGCACTGAAGCTTTCTTT	peak45	M1_v2_0_F1	0	1307	CD8
TGTGCCAGCAGTTACTCCCAGCGGGGAGCGGTC	peak10	M1_v2_0_F1	0	1308	CD8
TGTGCCAGCAGTTACTCCCAGGACAGGGGGTATAATTCACCCCTCCACTTT	peak5	M1_v2_0_F1	1.2731e-06	1309	CD4
TGTGCCAGCAGTTACTCGAACACAGCCTACGAGCAGTACTTC	peak45	M1_v2_0_F1	0	1310	CD8
TGTGCCAGCAGTTACTCGACGCCAGCTACAAACAATGAGCAGTTCTTC	peak10	M1_v2_0_F1	0	1311	CD8
TGTGCCAGCAGTTACTCGAGGACAGGCGCCTATGGCTACACCTTC	peak15	M1_v2_0_F1	0	1312	CD8
TGTGCCAGCAGTTACTCGCCAGGGGGTGCCTCACCCCTCCACTTT	peak10	M1_v2_0_F1	0	1313	CD8
TGTGCCAGCAGTTACTCGGGACAGGGGGCGATTGAGCCCCAGCATTTT	peak0	M1_v2_0_F1	0	1314	CD8
TGTGCCAGCAGTTACTCGGGACAGGGTTTTAGCACAGATACGCAGTATTTT	peak10	M1_v2_0_F1	0	1315	CD8
TGTGCCAGCAGTTACTCGGGAGACCCTGAAGCTTTCTTT	peak5	M1_v2_0_F1	0	1316	CD8
TGTGCCAGCAGTTACTCGTCGACTGGGGCCTACGAGCAGTACTTC	peak10	M1_v2_0_F1	0	1317	CD8
TGTGCCAGCAGTTACTCTCTGGACAGGGGCTATAATTCACCCCTCCACTTT	peak15	M1_v2_0_F1	0	1318	CD4
TGTGCCAGCAGTTACTTCAGTAGCGGGGAGCTGTTTTTT	peak10	M1_v2_0_F1	0	1319	CD8
TGTGCCAGCAGTTATATGACAGGGGAACAAGAGACCCAGTACTTC	peak0	M1_v2_0_F1	0	1320	CD4
TGTGCCAGCAGTTATCCCAATCAGCCCCAGCATTTT	peak5	M1_v2_0_F1	0	1321	CD8
TGTGCCAGCAGTTATCTACAGGGTCTCAGGAACACCGGGGAGCTGTTTTTT	peak0	M1_v2_0_F1	0	1322	CD8
TGTGCCAGCAGTTATTCGGACGGTGGCACCGGGGAGCTGTTTTTT	peak45	M1_v2_0_F1	0	1323	CD8
TGTGCCAGCAGTTCACAGGGGGCATATGGCTACACCTTC	peak0	M1_v2_0_F1	1.2731e-06	1324	CD8
TGTGCCAGCAGTTCACTTCAGGGCTACTATGGCTACACCTTC	peak5	M1_v2_0_F1	0	1325	CD4
TGTGCCAGCAGTTCAGCTTACACTGAAGCTTTCTTT	peak10	M1_v2_0_F1	0	1326	CD8
TGTGCCAGCAGTTCAGGGCCGAACGGCGCCTACGAGCAGTACTTC	peak10	M1_v2_0_F1	1.2731e-06	1327	CD8
TGTGCCAGCAGTTCAGGGGGCGGCCAGCCCCAGCATTTT	peak15	M1_v2_0_F1	0	1328	CD8
TGTGCCAGCAGTTCAGGGTCCCAAGAGACCCAGTACTTC	peak0	M1_v2_0_F1	2.54621e-06	1329	CD4
TGTGCCAGCAGTTCCACATCCGGACCAACCCTAACTAAAGTCGGGGAGCTGTTTTTT	peak0	M1_v2_0_F1	0	1330	CD8
TGTGCCAGCAGTTCCATCGACAGGGGAGGGGGTGAAAAACTGTTTTTT	peak45	M1_v2_0_F1	0	1331	CD8
TGTGCCAGCAGTTCCCCACTAGCGGGCATGGACACAGATACGCAGTATTTT	peak5	M1_v2_0_F1	0	1332	CD4
TGTGCCAGCAGTTCCCCTTCTGGGGCCAACGTCCTGACTTTC	peak10	M1_v2_0_F1	0	1333	CD4
TGTGCCAGCAGTTCCGGAGGCGAAGCTTTCTTT	peak5	M1_v2_0_F1	0	1335	CD8
TGTGCCAGCAGTTCCGGGACAGCCTACGAGCAGTACGTC	peak15	M1_v2_0_F1	0	1336	CD8
TGTGCCAGCAGTTCCTCCCCCGGGGGTAGCTCCTACGAGCAGTACTTC	peak5	M1_v2_0_F1	0	1337	CD8
TGTGCCAGCAGTTCGACAGGGGCCTACGAGCAGTACTTC	peak5	M1_v2_0_F1	0	1338	CD8
TGTGCCAGCAGTTCGAGCGGTGGCTCCTACAATGAGCAGTTCTTC	peak0	M1_v2_0_F1	0	1339	CD8
TGTGCCAGCAGTTCGCGGGGTGAAGATACGCAGTATTTT	peak5	M1_v2_0_F1	1.2731e-06	1340	CD4
TGTGCCAGCAGTTCGGCCTCCCTAGGCTACACCTTC	peak10	M1_v2_0_F1	0	1341	CD4
TGTGCCAGCAGTTCGGGACTAGCCTACGAGCAGTACTTC	peak5	M1_v2_0_F1	0	1342	CD8
TGTGCCAGCAGTTCTCAGGGGGCGGGAGATACGCAGTATTTT	peak45	M1_v2_0_F1	0	1343	CD4
TGTGCCAGCAGTTCTCCCAACCAGGATCAGTACTTC	peak15	M1_v2_0_F1	1.2731e-06	1344	CD4
TGTGCCAGCAGTTCTCCGGGACACCTGTATGGATATGAGCAGTTCTTC	peak5	M1_v2_0_F1	0	1345	CD4
TGTGCCAGCAGTTCTGGACGTGGGGGGGGCAGCACAGATACGCAGTATTTT	peak15	M1_v2_0_F1	0	1346	CD8
TGTGCCAGCAGTTCTGGATTTGCATTTACGCAGTATTTT	peak15	M1_v2_0_F1	3.81931e-06	1347	CD8
TGTGCCAGCAGTTCTGGGACCTATGCTCCCAGCTCCTACAATGAGCAGTTCTTC	peak5	M1_v2_0_F1	0	1348	CD4
TGTGCCAGCAGTTCTTTAGGGGTTGAGCAGTTCTTC	peak10	M1_v2_0_F1	0	1349	CD8
TGTGCCAGCAGTTGGCCGGGACGTCAGCTTAATGAAAAACTGTTTTTT	peak15	M1_v2_0_F1	0	1350	CD8
TGTGCCAGCAGTTGGCGGGACGGTTCTGGAAACACCATATATTTT	peak0	M1_v2_0_F1	0	1351	CD8
TGTGCCAGCAGTTGGGCGGGCACAGGGTACGAGCAGTACGTC	peak0	M1_v2_0_F1	0	1352	CD8
TGTGCCAGCAGTTGGGGGGCCCTGGGAAACACCATATATTTT	peak15	M1_v2_0_F1	1.2731e-06	1353	CD4
TGTGCCAGCAGTTGGGGGGTAGCGGGCCACAATGAGCAGTTCTTC	peak45	M1_v2_0_F1	0	1354	CD8
TGTGCCAGCAGTTTAAACCACTACAATGAGCAGTTCTTC	peak0	M1_v2_0_F1	0	1355	CD4
TGTGCCAGCAGTTTAAACGGGAACACCATATATTTT	peak15	M1_v2_0_F1	0	1356	CD4
TGTGCCAGCAGTTTAAATGCCGAGTCTAGCGGCTACACCTTC	peak10	M1_v2_0_F1	0	1357	CD8
TGTGCCAGCAGTTTAACGGGACTAGCGGCCGTCACCTACGAGCAGTACTTC	peak5	M1_v2_0_F1	0	1358	CD8
TGTGCCAGCAGTTTAAGCCGGAGCTACGAGCAGTACTTC	peak0	M1_v2_0_F1	0	1359	CD4
TGTGCCAGCAGTTTAAGCGGGGTCTACAATGAGCAGTTCTTC	peak0	M1_v2_0_F1	0	1360	CD8
TGTGCCAGCAGTTTAAGTCCAGAGGGTGAAAAACTGTTTTTT	peak0	M1_v2_0_F1	0	1361	CD4
TGTGCCAGCAGTTTAATGACGACAGGGGATGAGCAGTTCTTC	peak5	M1_v2_0_F1	1.2731e-06	1362	CD4
TGTGCCAGCAGTTTACAAGGGTCAAACTATGGCTACACCTTC	peak10	M1_v2_0_F1	0	1363	CD8
TGTGCCAGCAGTTTACAGGGATCTGGGTCCCACACAGATACGCAGTATTTT	peak15	M1_v2_0_F1	0	1364	CD8
TGTGCCAGCAGTTTACAGTCCGCAGGGGCTAACTATGGCTACACCTTC	peak0	M1_v2_0_F1	0	1365	CD8
TGTGCCAGCAGTTTACTTACTAGTGTATACACCGGGGAGCTGTTTTTT	peak0	M1_v2_0_F1	0	1366	CD8
TGTGCCAGCAGTTTAGAACTCGAGGGGCTCGAGCAGTACTTC	peak5	M1_v2_0_F1	0	1367	CD4
TGTGCCAGCAGTTTAGAGGGGTTTCAAGAGACCCAGTACTTC	peak15	M1_v2_0_F1	0	1368	CD8
TGTGCCAGCAGTTTAGCCCCCCTGGCCCAGGCGAACATTCAGTACTTC	peak5	M1_v2_0_F1	0	1369	CD8
TGTGCCAGCAGTTTAGGAAAGAGCTCCTATAATTCACCCCTCCACTTT	peak0	M1_v2_0_F1	0	1370	CD4
TGTGCCAGCAGTTTAGGCCAGATCCTTACTAATTATAATTCACCCCTCCACTTT	peak5	M1_v2_0_F1	0	1371	CD4
TGTGCCAGCAGTTTAGGCGGACAGGCGGGGGAGACCCAGTACTTC	peak5	M1_v2_0_F1	0	1373	CD8
TGTGCCAGCAGTTTAGGCTGGGGGAATCAGCCCCAGCATTTT	peak5	M1_v2_0_F1	0	1374	CD4
TGTGCCAGCAGTTTAGGGGGAGTCTACGAGCAGTACTTC	peak0	M1_v2_0_F1	1.2731e-06	1375	CD8
TGTGCCAGCAGTTTAGGGGGCACTGAAGCTTTCTTT	peak5	M1_v2_0_F1	0	1376	CD8
TGTGCCAGCAGTTTAGTCGACAGGCTCAATCAGCCCCAGCATTTT	peak5	M1_v2_0_F1	0	1377	CD8
TGTGCCAGCAGTTTATACGGGGGGTCGAACACTGAAGCTTTCTTT	peak45	M1_v2_0_F1	0	1378	CD8
TGTGCCAGCAGTTTATATGGGGGTAACACCGGGGAGCTGTTTTTT	peak0	M1_v2_0_F1	0	1379	CD8
TGTGCCAGCAGTTTATCCGGAGGGTTGGTTGGGGAGCTGTTTTTT	peak15	M1_v2_0_F1	0	1380	CD8
TGTGCCAGCAGTTTATCGACGGGGGGCCTCACCGGGGAGCTGTTTTTT	peak5	M1_v2_0_F1	0	1381	CD8
TGTGCCAGCAGTTTATCGATCCTTCAGCCCCAGCATTTT	peak10	M1_v2_0_F1	0	1382	CD8
TGTGCCAGCAGTTTATCGGCAGGGGGATACGAGCAGTACGTC	peak0	M1_v2_0_F1	0	1383	CD8
TGTGCCAGCAGTTTATTAGGCCATGGGCAGTACTTC	peak0	M1_v2_0_F1	1.2731e-06	1384	CD4
TGTGCCAGCAGTTTATTAGGGACAGGGGCGAACACCGGGGAGCTGTTTTTT	peak10	M1_v2_0_F1	0	1385	CD8
TGTGCCAGCAGTTTCACAGGGGGCGTAGATACGCAGTATTTT	peak45	M1_v2_0_F1	0	1386	CD4
TGTGCCAGCAGTTTCAGAACAGGGGGGACAGATACGCAGTATTTT	peak10	M1_v2_0_F1	0	1387	CD8
TGTGCCAGCAGTTTCCAGAAAAACACCGGGGAGCTGTTTTTT	peak5	M1_v2_0_F1	2.54621e-06	1388	CD4
TGTGCCAGCAGTTTCCCCGGACAGGGACTATCCTCCTACGAGCAGTACTTC	peak0	M1_v2_0_F1	0	1389	CD8
TGTGCCAGCAGTTTCCCGGGACAGGGGATGGGCTCCTACGAGCAGTACTTC	peak15	M1_v2_0_F1	0	1390	CD8
TGTGCCAGCAGTTTCGACAGGAACTACGAGCAGTACTTC	peak45	M1_v2_0_F1	1.2731e-06	1392	CD4
TGTGCCAGCAGTTTCGCCCCGGGGGATAGCACCGGGGAGCTGTTTTTT	peak15	M1_v2_0_F1	0	1393	CD4
TGTGCCAGCAGTTTCGGACTAGCGGGGTCCTTAGAGCAGTTCTTC	peak5	M1_v2_0_F1	0	1394	CD4
TGTGCCAGCAGTTTCGGCAGGGCCTACGAGCAGTACGTC	peak15	M1_v2_0_F1	0	1395	CD8
TGTGCCAGCAGTTTCGGGACAGGAGCGAACACTGAAGCTTTCTTT	peak5	M1_v2_0_F1	0	1396	CD4
TGTGCCAGCAGTTTCTACACCCTGACCTATGGCTACACCTTC	peak5	M1_v2_0_F1	0	1397	CD8
TGTGCCAGCAGTTTCTATACTAGTTCCGGGGAGCTGTTTTTT	peak0	M1_v2_0_F1	0	1398	CD8
TGTGCCAGCAGTTTCTTCTGGACAGGGCACACCGGGGAGCTGTTTTTT	peak15	M1_v2_0_F1	1.2731e-06	1399	CD8
TGTGCCAGCAGTTTCTTGGGATCTGAAGCTTTCTTT	peak0	M1_v2_0_F1	0	1400	CD4
TGTGCCAGCAGTTTGAGGCAGGGCCTAAACTCCTATAATTCACCCCTCCACTTT	peak0	M1_v2_0_F1	0	1401	CD8
TGTGCCAGCAGTTTGCCGGGACAGGGGATGAGCTCCTACGAGCAGTACGTC	peak0	M1_v2_0_F1	0	1402	CD8
TGTGCCAGCAGTTTGCTAGCGAGGAGCACAGATACGCAGTATTTT	peak10	M1_v2_0_F1	0	1403	CD8
TGTGCCAGCAGTTTGGAAACCGTCGGAAACATTCAGTACTTC	peak10	M1_v2_0_F1	0	1404	CD4
TGTGCCAGCAGTTTGGCATTAAGTCGGGGGTATAATTCACCCCTCCACTTT	peak0	M1_v2_0_F1	0	1405	CD4
TGTGCCAGCAGTTTGGGAATCTATGGCTACACCTTC	peak0	M1_v2_0_F1	0	1406	CD8
TGTGCCAGCAGTTTGGGCGCGATACAGCCCCAGCATTTT	peak5	M1_v2_0_F1	1.2731e-06	1407	CD4
TGTGCCAGCAGTTTGGGCGGCGTCTACGAGCAGTACTTC	peak10	M1_v2_0_F1	1.2731e-06	1408	CD8
TGTGCCAGCAGTTTGGGGGGCTCCTACGAGCAGTACGTC	peak0	M1_v2_0_F1	0	1409	CD8
TGTGCCAGCAGTTTGGGGGGGACAGGCACCTACGAGCAGTACTTC	peak45	M1_v2_0_F1	0	1410	CD8
TGTGCCAGCAGTTTGGGGGGGGCTGGAAGTCAGCCCCAGCATTTT	peak5	M1_v2_0_F1	3.81931e-06	1411	CD8
TGTGCCAGCAGTTTGGGGGGTAGGGGGACGACCCAGTACTTC	peak15	M1_v2_0_F1	0	1412	CD4
TGTGCCAGCAGTTTGTCCCGAGGGGGTCAAGAGACCCAGTACTTC	peak5	M1_v2_0_F1	0	1413	CD4
TGTGCCAGCAGTTTTAATGGGCCCAACTATGGCTACACCTTC	peak5	M1_v2_0_F1	0	1414	CD8
TGTGCCAGCAGTTTTACCTCTAACTATGGCTACACCTTC	peak45	M1_v2_0_F1	0	1415	CD8
TGTGCCAGCAGTTTTACTCAGGGGTTCTCCACAGATACGCAGTATTTT	peak5	M1_v2_0_F1	2.54621e-06	1416	CD8
TGTGCCAGCAGTTTTAGTTCGGTCGGCGGGTACGAGCAGTACTTC	peak15	M1_v2_0_F1	0	1417	CD4
TGTGCCAGCAGTTTTCCCGGACAGGGGGCTGCCGGGGAGCTGTTTTTT	peak0	M1_v2_0_F1	0	1419	CD8
TGTGCCAGCAGTTTTCGACAGGGACTTAGCTCCTATAATTCACCCCTCCACTTT	peak0	M1_v2_0_F1	0	1420	CD8
TGTGCCAGCAGTTTTGGATTCACAGATACGCAGTATTTT	peak0	M1_v2_0_F1	0	1421	CD8
TGTGCCAGCAGTTTTGGCACCGGCACCGGCACTGAAGCTTTCTTT	peak0	M1_v2_0_F1	0	1422	CD4
TGTGCCAGCAGTTTTGGGACAACGAACACTGAAGCTTTCTTT	peak5	M1_v2_0_F1	0	1423	CD4
TGTGCCAGCAGTTTTGGGACAGGGTCGGGAACTGAAGCTTTCTTT	peak5	M1_v2_0_F1	0	1424	CD4
TGTGCCAGCAGTTTTTCTGTTTTGTCACCCCTCCACTTT	peak10	M1_v2_0_F1	0	1426	CD8
TGTGCCAGCAGTTTTTGGGCCCCGAACACCGGGGAGCTGTTTTTT	peak5	M1_v2_0_F1	2.54621e-06	1427	CD4
TGTGCCAGCAGTTTTTGGGCGAACACCGGGGAGCTGTTTTTT	peak5	M1_v2_0_F1	0	1428	CD8
TGTGCCAGCATAAAAGAGTGGGCGACCACCGGGGAGCTGTTTTTT	peak5	M1_v2_0_F1	0	1429	CD4
TGTGCCAGCATAGGGCAGGGTCACGGGGAGCTGTTTTTT	peak45	M1_v2_0_F1	0	1430	CD8
TGTGCCAGCATCAATAGCGGGGGGCTTTATACGCAGTATTTT	peak0	M1_v2_0_F1	0	1431	CD8
TGTGCCAGCATCATGGGGAGCGGGGCCTCCTACAATGAGCAGTTCTTC	peak5	M1_v2_0_F1	0	1432	CD8
TGTGCCAGCATCCTAGCGGGGTTCTACGAGCAGTACTTC	peak45	M1_v2_0_F1	0	1433	CD8
TGTGCCAGCATCGCCGGGACAGGGCCCTCCTACGAGCAGTACTTC	peak45	M1_v2_0_F1	0	1434	CD4
TGTGCCAGCATCTACCTTGACGGGGGTGAGCAGTTCTTC	peak5	M1_v2_0_F1	0	1436	CD4
TGTGCCAGCATGAACGGGGGGATCGGGCCTAGCACAGATACGCAGTATTTT	peak5	M1_v2_0_F1	0	1437	CD4
TGTGCCAGCATTCGGACAGGGGGCTGGACGGAAGCTTTCTTT	peak5	M1_v2_0_F1	0	1438	CD4
TGTGCCAGCATTGGGGGGGCGTTAGGCACTGAAGCTTTCTTT	peak10	M1_v2_0_F1	0	1439	CD4
TGTGCCAGCCACAGGGACACCGGGGAGCTGTTTTTT	peak5	M1_v2_0_F1	1.2731e-06	1440	CD4
TGTGCCAGCCCCTCTCGAGCATCCTATAATTCACCCCTCCACTTT	peak15	M1_v2_0_F1	0	1441	CD8
TGTGCCAGCCCTAGCGGGGAGTCGCCTAGCACAGATACGCAGTATTTT	peak45	M1_v2_0_F1	2.54621e-06	1442	CD8
TGTGCCAGCCGACCGGGACTCGAGCAGCCTGAGCAGTTCTTC	peak10	M1_v2_0_F1	0	1443	CD8
TGTGCCAGCCGAGGCACCCTAGAGGAGCAGTACTTC	peak0	M1_v2_0_F1	0	1444	CD8
TGTGCCAGCCGCCGCCGAGCGGCGAACACCGGGGAGCTGTTTTTT	peak15	M1_v2_0_F1	0	1445	CD4
TGTGCCAGCCGCGGAGAGTCACCCCTCCACTTT	peak0	M1_v2_0_F1	0	1446	CD4
TGTGCCAGCGAAAGTCATATGGGTGAGCAGTTCTTC	peak0	M1_v2_0_F1	3.81931e-06	1447	CD8
TGTGCCAGCGAAGGAGGCAATGGTCCCCAGCATTTT	peak0	M1_v2_0_F1	0	1448	CD8
TGTGCCAGCGACAAGACAGGGGGCGTACTCACAGATACGCAGTATTTT	peak5	M1_v2_0_F1	7.63862e-06	1449	CD4
TGTGCCAGCGAGCCGGGACAGGGGTGGTCAGATACGCAGTATTTT	peak45	M1_v2_0_F1	0	1450	CD4
TGTGCCAGCGCCAGCGGGCCGGCCTACGAGCAGTACTTC	peak45	M1_v2_0_F1	0	1451	CD8
TGTGCCAGCGCCTCCGGGGGCCCCGCCTACGAGCAGTACTTC	peak0	M1_v2_0_F1	0	1452	CD8
TGTGCCAGCGCTGACAACTATGGCTACACCTTC	peak5	M1_v2_0_F1	0	1453	CD4
TGTGCCAGCGGAACCGGGACAGGGGGTTACGAGCAGTACTTC	peak0	M1_v2_0_F1	0	1454	CD8
TGTGCCAGCGGAGGATACCAAGAGACCCAGTACTTC	peak5	M1_v2_0_F1	0	1455	CD4
TGTGCCAGCGGAGTCGTGTGGGACACTGAAGCTTTCTTT	peak0	M1_v2_0_F1	1.2731e-06	1456	CD4
TGTGCCAGCGGCGGACAGGGGGCCTACGAGCAGTACTTC	peak10	M1_v2_0_F1	1.2731e-06	1457	CD8
TGTGCCAGCGGCGGATCTGGGACTCTAGCGGGGTACGAGCAGTACGTC	peak45	M1_v2_0_F1	0	1458	CD8
TGTGCCAGCGGCTCAACAGGGAGCAATCAGCCCCAGCATTTT	peak15	M1_v2_0_F1	0	1459	CD8
TGTGCCAGCGGGATCACCTCCCTCGGCGCCTACGAGCAGTACTTC	peak15	M1_v2_0_F1	0	1460	CD8
TGTGCCAGCGGGGGCGGGGTCGGTTACAATGAGCAGTTCTTC	peak0	M1_v2_0_F1	0	1461	CD8
TGTGCCAGCGGGTCCGCGACTAATGAAAAACTGTTTTTT	peak5	M1_v2_0_F1	0	1462	CD4
TGTGCCAGCGGTCCTAAGGGGAATGGCTACACCTTC	peak5	M1_v2_0_F1	0	1463	CD4
TGTGCCAGCGGTTCCCCGGACGGCTCTGGCTACACCTTC	peak45	M1_v2_0_F1	0	1464	CD8
TGTGCCAGCGTATTAACGGGGGCCACCACAGATACGCAGTATTTT	peak0	M1_v2_0_F1	0	1465	CD8
TGTGCCAGCGTCCGGGTCGCAGAGGCGGGAAAACTGTTTTTT	peak45	M1_v2_0_F1	0	1466	CD8
TGTGCCAGCGTCCTACAGGGGGCAACTGAAGCTTTCTTT	peak10	M1_v2_0_F1	0	1467	CD8
TGTGCCAGCGTCGGCGGGGGTTCCTACGAGCAGTACTTC	peak10	M1_v2_0_F1	0	1468	CD8
TGTGCCAGCGTTCCGGGACGGAACAATGAGCAGTTCTTC	peak45	M1_v2_0_F1	1.2731e-06	1469	CD8
TGTGCCAGCTCACAGGGGGCAGAGACCCAGTACTTC	peak0	M1_v2_0_F1	0	1470	CD8
TGTGCCAGCTCACCACCAGGGGGCAGTTACTACAATGAGCAGTTCTTC	peak0	M1_v2_0_F1	0	1471	CD4
TGTGCCAGCTCACCACCCAGCCGGATGGGAAGCGGCGAAAAACTGTTTTTT	peak0	M1_v2_0_F1	1.2731e-06	1472	CD4
TGTGCCAGCTCACCACCGAGTACGACGAACACTGAAGCTTTCTTT	peak5	M1_v2_0_F1	0	1473	CD4
TGTGCCAGCTCACCACCTTCCGTGTACGGAGCCAAAAACATTCAGTACTTC	peak5	M1_v2_0_F1	0	1474	CD4
TGTGCCAGCTCACCAGGACAGGGTGACTATGGCTACACCTTC	peak15	M1_v2_0_F1	0	1476	CD4
TGTGCCAGCTCACCAGGGGATCTAGGTCAGCCCCAGCATTTT	peak0	M1_v2_0_F1	0	1477	CD4
TGTGCCAGCTCACCATACGGAAGGGAGCTGTTTTTT	peak10	M1_v2_0_F1	0	1478	CD4
TGTGCCAGCTCACCATCTTTTAACTACGAGCAGTACGTC	peak0	M1_v2_0_F1	0	1479	CD8
TGTGCCAGCTCACCCCCTGGGACGGCAGCTAACTATGGCTACACCTTC	peak5	M1_v2_0_F1	0	1480	CD4
TGTGCCAGCTCACCCTGGGGACAGGGAACTTCTGGGGCCAACGTCCTGACTTTC	peak5	M1_v2_0_F1	0	1481	CD4
TGTGCCAGCTCACCGGGACAGGCCTACGAGCAGTACTTC	peak5	M1_v2_0_F1	0	1482	CD8
TGTGCCAGCTCACCGGGGGAACTTTACGAGCAGTACTTC	peak0	M1_v2_0_F1	0	1483	CD8
TGTGCCAGCTCACCTCCGGGACTAGCGTCGAATAATGAGCAGTTCTTC	peak0	M1_v2_0_F1	0	1484	CD4
TGTGCCAGCTCACGCTACCAAGAGACCCAGTACTTC	peak15	M1_v2_0_F1	0	1485	CD4
TGTGCCAGCTCACTGACAGGGGCCATCAATGAGCAGTTCTTC	peak5	M1_v2_0_F1	0	1486	CD4
TGTGCCAGCTCACTGGGGCCGGGACCCGTATCGGAAGCTTTCTTT	peak5	M1_v2_0_F1	0	1487	CD8
TGTGCCAGCTCACTTGGACAGGACGAATATGGCTACACCTTC	peak5	M1_v2_0_F1	0	1488	CD4
TGTGCCAGCTCAGCCGGACAGGGGGACTATGGCTACACCTTC	peak10	M1_v2_0_F1	0	1489	CD4
TGTGCCAGCTCATCGGGACAGGCCTACGAGCAGTACTTC	peak10	M1_v2_0_F1	0	1490	CD8
TGTGCCAGCTCCACGAGCCCAGATGGGTATGGCTACACCTTC	peak15	M1_v2_0_F1	0	1491	CD4
TGTGCCAGCTCCCCAGGATCCTATAATTCACCCCTCCACTTT	peak0	M1_v2_0_F1	0	1492	CD4
TGTGCCAGCTCCTTCACTCTAAACAATGAGCAGTTCTTC	peak0	M1_v2_0_F1	0	1493	CD8
TGTGCCAGCTCGAGCGGGGGGGCCTACGAGCAGTACTTC	peak15	M1_v2_0_F1	0	1494	CD8
TGTGCCAGCTCGGCCGGGACGGGGGCCTACGAGCAGTACTTC	peak45	M1_v2_0_F1	0	1495	CD8
TGTGCCAGCTCGGCCGGGCCAGCGGGAACCTACGAGCAGTACGTC	peak5	M1_v2_0_F1	5.09241e-06	1496	CD8
TGTGCCAGCTTAAACCCAGGCTCCTACGAGCAGTACTTC	peak5	M1_v2_0_F1	2.54621e-06	1497	CD8
TGTGCCAGCTTACCGGGACTAGCCTACGAGCAGTACTTC	peak5	M1_v2_0_F1	0	1498	CD8
TGTGCCAGCTTCGGGGGGGCTGGACAGCCCCAGCATTTT	peak15	M1_v2_0_F1	0	1499	CD8
TGTGCCAGGCCGGGACCCAACTATTCCTACGAGCAGTACTTC	peak5	M1_v2_0_F1	0	1500	CD4
TGTGCCAGGGAACGACGGGGCAGACCCCTGCAGCCCCAGCATTTT	peak0	M1_v2_0_F1	0	1501	CD8
TGTGCCAGGGGTAATACGACCGCTGAGCAGTTCTTC	peak0	M1_v2_0_F1	0	1502	CD8
TGTGCCAGTACCGACTTCACAGATACGCAGTATTTT	peak0	M1_v2_0_F1	0	1503	CD8
TGTGCCAGTACGAATTTCGCGGATACGCAGTATTTT	peak5	M1_v2_0_F1	0	1504	CD8
TGTGCCAGTAGACAGGGGCGCGGCTACACCTTC	peak10	M1_v2_0_F1	0	1505	CD8
TGTGCCAGTAGCCCACAGGATTCCAGCAATCAGCCCCAGCATTTT	peak15	M1_v2_0_F1	0	1506	CD8
TGTGCCAGTAGCTACGGAACGCTTCGATTCGGGGAGCTGTTTTTT	peak15	M1_v2_0_F1	0	1507	CD8
TGTGCCAGTAGCTTCGGGGTGAACAATGAGCAGTTCTTC	peak5	M1_v2_0_F1	0	1508	CD8
TGTGCCAGTAGGCAGGGGAACACTGAAGCTTTCTTT	peak0	M1_v2_0_F1	0	1509	CD8
TGTGCCAGTAGTATATTGGGGGGGGATGAGCAGTTCTTC	peak0	M1_v2_0_F1	0	1511	CD8
TGTGCCAGTAGTATCCCCCCCGGGACAGGGGGCGTTGAGCAGTTCTTC	peak45	M1_v2_0_F1	0	1512	CD4
TGTGCCAGTAGTATCGCCGGACAGGATCCCAACGAGCAGTACTTC	peak5	M1_v2_0_F1	0	1513	CD4
TGTGCCAGTAGTATGGGAGGGGGCCCTCTGGAGCAGTTCTTC	peak5	M1_v2_0_F1	0	1514	CD8
TGTGCCAGTAGTATTCCTGCCGGGGGCGCCTATGGCTACACCTTC	peak15	M1_v2_0_F1	0	1515	CD8
TGTGCCAGTAGTATTGTCCGGTCCTTCATCAACGGGGAGCAGTACTTC	peak10	M1_v2_0_F1	0	1516	CD8
TGTGCCAGTAGTATTTCGGCGAACACTGAAGCTTTCTTT	peak0	M1_v2_0_F1	1.2731e-06	1517	CD8
TGTGCCAGTAGTGGAACAGGGTCATCCTACGAGCAGTACTTC	peak5	M1_v2_0_F1	0	1518	CD8
TGTGCCAGTAGTGGCTCGACAGGGTACGAGCAGTACTTC	peak45	M1_v2_0_F1	0	1519	CD8
TGTGCCAGTATGGACAGTGAGACCCAGTACTTC	peak5	M1_v2_0_F1	0	1520	CD4
TGTGCCAGTATGGAGGGGGCCGCGCGTGAGCAGTTCTTC	peak0	M1_v2_0_F1	1.2731e-06	1521	CD4
TGTGCCAGTCGACAGGGTTTTGGCACTGAAGCTTTCTTT	peak15	M1_v2_0_F1	0	1522	CD8
TGTGCCAGTGCCCCGTTCGGGGGGGCGGGCTACACCTTC	peak10	M1_v2_0_F1	0	1523	CD8
TGTGCCAGTGGACAGGGAGCCTACGAGCAGTACTTC	peak10	M1_v2_0_F1	5.09241e-06	1524	CD8
TGTGCCAGTGGGGACAGGGCGATGCCCCAGCATTTT	peak5	M1_v2_0_F1	5.09241e-06	1525	CD8
TGTGCCAGTGGGGCGGGGGGCCCCTACGAGCAGTACTTC	peak15	M1_v2_0_F1	1.2731e-06	1526	CD8
TGTGCCAGTTCGGCGGAACAAGAGACCCAGTACTTC	peak5	M1_v2_0_F1	0	1527	CD4
TGTGCCATCACCAGCGGATCTAGCACAGATACGCAGTATTTT	peak5	M1_v2_0_F1	8.91173e-06	1528	CD4
TGTGCCATCACCCAGGATCACGGGGAGCTGTTTTTT	peak5	M1_v2_0_F1	0	1529	CD4
TGTGCCATCAGCACAGGGGACAATGGCAATCAGCCCCAGCATTTT	peak10	M1_v2_0_F1	0	1531	CD4
TGTGCCATCAGTCCCGGGACAGCCAGATCTGGAAACACCATATATTTT	peak0	M1_v2_0_F1	0	1532	CD8
TGTGCCATCAGTGAAGGGGGAAATGAAAAACTGTTTTTT	peak15	M1_v2_0_F1	2.54621e-06	1533	CD8
TGTGCCATCAGTGAAGGTGGGGCCTACGAGCAGTACTTC	peak5	M1_v2_0_F1	1.2731e-06	1534	CD8
TGTGCCATCAGTGAATCCGGGACAGCATACAATGAGCAGTTCTTC	peak0	M1_v2_0_F1	7.63862e-06	1535	CD8
TGTGCCATCAGTGAATGGACACTGGGTGAAGCTTTCTTT	peak0	M1_v2_0_F1	2.54621e-06	1536	CD8
TGTGCCATCAGTGACGGCGGACAAGAGACCCAGTACTTC	peak5	M1_v2_0_F1	3.81931e-06	1537	CD8
TGTGCCATCAGTGAGGGACAGGGAAGGCCACCCCTCCACTTT	peak15	M1_v2_0_F1	0	1538	CD4
TGTGCCATCAGTGAGGGTAGCGGGATTGCCTACGAGCAGTACTTC	peak5	M1_v2_0_F1	0	1539	CD8
TGTGCCATCAGTGAGGGTTACAACTACGAGCAGTACGTC	peak5	M1_v2_0_F1	1.2731e-06	1540	CD4
TGTGCCATCAGTGAGTCGATTCTTGTAGGTAGTATCTATGGCTACACCTTC	peak15	M1_v2_0_F1	0	1541	CD8
TGTGCCATCAGTGAGTCGCAAGAGACCCAGTACTTC	peak0	M1_v2_0_F1	1.2731e-06	1542	CD4
TGTGCCATCAGTGAGTCGCAGATGGGACAGGGACATCAGCCCCAGCATTTT	peak0	M1_v2_0_F1	0	1543	CD4
TGTGCCATCAGTGATGCGGGACAGTCCCACGAGCAGTACTTC	peak10	M1_v2_0_F1	0	1544	CD8
TGTGCCATCAGTGATGGGACTAGTGGTAGCTCCTACAATGAGCAGTTCTTC	peak45	M1_v2_0_F1	0	1545	CD8
TGTGCCATCAGTGCGGGGGAAGGCTACGAGCAGTACTTC	peak0	M1_v2_0_F1	1.2731e-06	1546	CD8
TGTGCCATCAGTGGACAGGGGGCAAATGAAGCTTTCTTT	peak0	M1_v2_0_F1	0	1547	CD4
TGTGCCATCAGTGGGCAGGGCACTGAAGCTTTCTTT	peak5	M1_v2_0_F1	1.2731e-06	1548	CD4
TGTGCCATCAGTGGTAACAGGGGTCGCAATCAGCCCCAGCATTTT	peak5	M1_v2_0_F1	0	1549	CD4
TGTGCCATCAGTGTCCAAGGCACGGACACCGGGGAGCTGTTTTTT	peak45	M1_v2_0_F1	0	1550	CD4
TGTGCCATCAGTGTCGAGGGGACAGGCCTGGGATATGGCTACACCTTC	peak0	M1_v2_0_F1	1.2731e-06	1551	CD8
TGTGCCATCAGTTCCGGCCCGGGACAGGGGATCGGGGAGCTGTTTTTT	peak5	M1_v2_0_F1	1.2731e-06	1552	CD4
TGTGCCATCCATAGCGGGTCACACAATGAGCAGTTCTTC	peak15	M1_v2_0_F1	0	1553	CD8
TGTGCCATCGGGACTAGCGGGGGCTATGAGCAGTTCTTC	peak0	M1_v2_0_F1	0	1554	CD8
TGTGCCATCTCGGGGGGTGGCAATCAGCCCCAGCATTTT	peak15	M1_v2_0_F1	0	1555	CD4
TGTGCCATTTCGCTAGCGGGGGGGAACAATGAGCAGTTCTTC	peak5	M1_v2_0_F1	0	1556	CD8
TGTGCCGTCGACTCTAGCGGGGTCACAGATACGCAGTATTTT	peak5	M1_v2_0_F1	2.54621e-05	1557	CD8
TGTGCCGTGGCGGGACAGGGCTCCTACGAGCAGTACTTC	peak0	M1_v2_0_F1	0	1558	CD8
TGTGCCTATGGACTAGCGGGGGCCCTTGCGGAGACCCAGTACTTC	peak10	M1_v2_0_F1	0	1559	CD8
TGTGCCTCCTCCCCGGGGCCCAACCCCACTGAAGCTTTCTTT	peak5	M1_v2_0_F1	0	1560	CD4
TGTGCCTCGGCGGGCGGATACAATCAGCCCCAGCATTTT	peak5	M1_v2_0_F1	0	1561	CD8
TGTGCCTCTGGGACTAGCGGGGCCTACGAGCAGTACTTC	peak15	M1_v2_0_F1	0	1562	CD8
TGTGCCTGGAACGGGGGGCGGGGACAGCCCCAGCATTTT	peak5	M1_v2_0_F1	0	1563	CD8
TGTGCCTGGACTGTGGAGGGAAAGTAACTCCGGGGAGCTGTTTTTT	peak0	M1_v2_0_F1	6.36552e-06	1564	CD8
TGTGCCTGGAGCACCGGGGCCGCCTACGAGCAGTACTTC	peak15	M1_v2_0_F1	1.2731e-06	1565	CD8
TGTGCCTGGAGTCTAGCGGGGGGGTCGATAGAGACCCAGTACTTC	peak0	M1_v2_0_F1	1.2731e-06	1566	CD8
TGTGCCTGGAGTCTGTCAGGGTTCACTGAAGCTTTCTTT	peak5	M1_v2_0_F1	0	1567	CD8
TGTGCCTGGAGTGCGGGCCTGGCCTACGAGCAGTACTTC	peak15	M1_v2_0_F1	5.09241e-06	1568	CD8
TGTGCCTGGAGTGGCTGGGGGGCGGGTAACACTGAAGCTTTCTTT	peak5	M1_v2_0_F1	0	1569	CD4
TGTGCCTGGAGTGTACGGAGCGGGCAAGAGACCCAGTACTTC	peak0	M1_v2_0_F1	0	1570	CD4
TGTGCCTGGAGTTTTACAGGGGCAACTAATGAAAAACTGTTTTTT	peak10	M1_v2_0_F1	0	1571	CD8
TGTGCCTGGGAAGCAGGACAGGGAACTCAGCCCCAGCATTTT	peak0	M1_v2_0_F1	1.2731e-06	1572	CD8
TGTGCCTGGGGGACAGGGGGCAGGGAGACCCAGTACTTC	peak10	M1_v2_0_F1	0	1573	CD8
TGTGCCTGGGGGCAGTCCTACGAGCAGTACTTC	peak5	M1_v2_0_F1	1.2731e-06	1574	CD8
TGTGCCTGGTTTAGAGGGGGGCCCGGGGAGCTGTTTTTT	peak5	M1_v2_0_F1	0	1575	CD4
TGTGCCTTGGCGACAGTTTACGAGCAGTACTTC	peak10	M1_v2_0_F1	1.2731e-06	1576	CD8
TGTGCTACCACCACAGACTATAATTCACCCCTCCACTTT	peak10	M1_v2_0_F1	1.2731e-06	1577	CD8
TGTGCTAGCAGCTTAAAGGGGCTGAACACTGAAGCTTTCTTT	peak10	M1_v2_0_F1	0	1578	CD8
TGTGCTAGTGGTCTACAGAGCTCCTACGAGCAGTACTTC	peak0	M1_v2_0_F1	0	1579	CD8
TGTGCTAGTGGTTTGGACGGATACGAGCAGTACTTC	peak10	M1_v2_0_F1	0	1580	CD8
TGCACCAGCAGCCCTACATCATACTGGAATGAAAAACTGTTTTTT	peak45	M1_v2_5_F1	0	1	CD8
TGCAGACGGGGGGGCGCAGATACGCAGTATTTT	peak15	M1_v2_5_F1	0	2	CD8
TGCAGCATATCGGACAGGGGGCTCACCGGGGAGCTGTTTTTT	peak15	M1_v2_5_F1	4.06198e-06	3	CD8
TGCAGCGCACCACTAGCGGGGGGGAACAATGAGCAGTTCTTC	peak5	M1_v2_5_F1	0	4	CD8
TGCAGCGCACTCGAGGGCTATGGCTACACCTTC	peak0	M1_v2_5_F1	0	5	CD8
TGCAGCGCCCCACTAGCGGGGGGAGGGAATGAGCAGTTCTTC	peak5	M1_v2_5_F1	1.32014e-05	6	CD8
TGCAGCGCTTCCCCCGCCAGCTACAATGAGCAGTTCTTC	peak5	M1_v2_5_F1	3.96043e-05	7	CD4
TGCAGCGGTTGGAAGTCGGGGGAATTCTACGAGCAGTACGTC	peak0	M1_v2_5_F1	1.01549e-06	8	CD4
TGCAGCGTAAACAGGGGGATAGGGAACACTGAAGCTTTCTTT	peak5	M1_v2_5_F1	0	9	CD8
TGCAGCGTCACAACAGGGATCAGCTACGAGCAGTACTTC	peak10	M1_v2_5_F1	8.12396e-06	10	CD8
TGCAGCGTCACAGCACCAGCTAACTATGGCTACACCTTC	peak5	M1_v2_5_F1	1.21859e-05	11	CD4
TGCAGCGTCCCCCTGGGCGGTGGAGCCAATGAGCAGTTCTTC	peak15	M1_v2_5_F1	0	12	CD8
TGCAGCGTCCCTCTAAGCGGGGGGGGTAATGAGCAGTTCTTC	peak0	M1_v2_5_F1	0	13	CD8
TGCAGCGTCGGGATGACTAGCGGGGCCGAGGGGACCCAGTACTTC	peak0	M1_v2_5_F1	0	14	CD4
TGCAGCGTCTCCCTAAACGCGGGAAACACTGAAGCTTTCTTT	peak5	M1_v2_5_F1	1.01549e-06	15	CD4
TGCAGCGTGCAGGACATAGACACAGATACGCAGTATTTT	peak10	M1_v2_5_F1	1.01549e-06	16	CD4
TGCAGCGTGGGGGGGACTAGCGGACGGGGTACAGATACGCAGTATTTT	peak10	M1_v2_5_F1	0	17	CD8
TGCAGCGTTGAAGATTTTCCCACTGAAGCTTTCTTT	peak0	M1_v2_5_F1	0	18	CD8
TGCAGCGTTGAAGCGCACAGGGGCACCGGGGAGCTGTTTTTT	peak15	M1_v2_5_F1	1.01549e-06	19	CD4
TGCAGCGTTGACAGGAGGTCTGATGAAGCTTTCTTT	peak5	M1_v2_5_F1	1.01549e-06	20	CD8
TGCAGCGTTGGAGAGCCGACCCCTTATGGCTACACCTTC	peak5	M1_v2_5_F1	1.21859e-05	22	CD4
TGCAGCGTTGGAGGCGGGGTAAAGTGGGGCTACACCTTC	peak5	M1_v2_5_F1	2.64029e-05	23	CD4
TGCAGCGTTGGGGAGGGGGTTGCCTACGAGCAGTACTTC	peak0	M1_v2_5_F1	0	24	CD8
TGCAGCGTTGTCGTCTCGAGGGGGGAAGAGACCCAGTACTTC	peak5	M1_v2_5_F1	1.42169e-05	25	CD4
TGCAGCGTTTGGGACACAACTAACTATGGCTACACCTTC	peak5	M1_v2_5_F1	8.12396e-06	26	CD4
TGCAGTGAAAAGGGGGGGAGCTCCTACGAGCAGTACGTC	peak0	M1_v2_5_F1	0	27	CD8
TGCAGTGCAACGGGGAACCGGGGCACAGATACGCAGTATTTT	peak5	M1_v2_5_F1	0	28	CD8
TGCAGTGCAGCGGGCCAGCGGGGGGCAGATACGCAGTATTTT	peak0	M1_v2_5_F1	0	29	CD8
TGCAGTGCCAACAGGGGAGCCACTGAAGCTTTCTTT	peak15	M1_v2_5_F1	2.03099e-06	31	CD8
TGCAGTGCCCCCCAGGGGACCGGGGGGCACGACACTGAAGCTTTCTTT	peak0	M1_v2_5_F1	0	32	CD4
TGCAGTGCCCCCCGGCGGCAGGATGAGCAGTTCTTC	peak15	M1_v2_5_F1	4.26508e-05	33	CD8
TGCAGTGCCCCCGACAGGGAATCGGCGTTAAGGGAGACCCAGTACTTC	peak15	M1_v2_5_F1	0	34	CD8
TGCAGTGCCCCCGTGTACAGGGGTGCAGATACGCAGTATTTT	peak45	M1_v2_5_F1	0	35	CD8
TGCAGTGCCCCGACTAGCGGGGGGGACAATGAGCAGTTCTTC	peak5	M1_v2_5_F1	3.04648e-06	36	CD8
TGCAGTGCCCCGAGACGGACGGATGAGCAGTTCTTC	peak10	M1_v2_5_F1	0	37	CD8
TGCAGTGCCCCGCCCCCGGGAGGACAGAGCTCCTACAATGAGCAGTTCTTC	peak45	M1_v2_5_F1	0	38	CD4
TGCAGTGCCCCGCCCGCAACTAGCGGGGGAACAACACAAGAGACCCAGTACTTC	peak5	M1_v2_5_F1	3.04648e-06	39	CD4
TGCAGTGCCCCGTCCGGAGGGGGCCTTAATGAGCAGTTCTTC	peak15	M1_v2_5_F1	1.01549e-06	40	CD8
TGCAGTGCCCCTCTAGCGGGGGGGGGGAATGAGCAGTTCTTC	peak0	M1_v2_5_F1	0	41	CD8
TGCAGTGCCCTAGGAAAGCGGGGCACAGATACGCAGTATTTT	peak0	M1_v2_5_F1	0	42	CD8
TGCAGTGCCCTCGGGGGGGAAGCGTACGAGCAGTACTTC	peak15	M1_v2_5_F1	0	43	CD4
TGCAGTGCCGCTATGGGGCAGTACGTC	peak0	M1_v2_5_F1	0	44	CD8
TGCAGTGCCGGGACAGCGGCAACTAATGAAAAACTGTTTTTT	peak10	M1_v2_5_F1	8.12396e-06	45	CD8
TGCAGTGCCGGGTTGGGCCTCCCCTACGAGCAGTACTTC	peak45	M1_v2_5_F1	2.03099e-06	46	CD8
TGCAGTGCCGTCCTTCCGGGACTAGCGGGTTACAATGAGCAGTTCTTC	peak5	M1_v2_5_F1	3.04648e-05	47	CD8
TGCAGTGCCTTAGGAGCCCATTTAAATGAAAAACTGTTTTTT	peak0	M1_v2_5_F1	0	48	CD8
TGCAGTGCGATGACTAGCTCGTGGCAGACCCAGTACTTC	peak0	M1_v2_5_F1	0	49	CD4
TGCAGTGCGCCTGACAGGGGGCTTAGGAGCTACACCTTC	peak15	M1_v2_5_F1	0	50	CD4
TGCAGTGCGGCAAGGGGACAGGGGAGCAGCGATGAGCAGTTCTTC	peak15	M1_v2_5_F1	0	51	CD4
TGCAGTGCTAAATTATCCTCAGGGATTAGCAATCAGCCCCAGCATTTT	peak5	M1_v2_5_F1	3.04648e-06	52	CD4
TGCAGTGCTAACCGGGACCTAGGGGTAAACACCATATATTTT	peak5	M1_v2_5_F1	3.04648e-06	53	CD4
TGCAGTGCTACCTCATGGGGGAGCTCCTACAATGAGCAGTTCTTC	peak45	M1_v2_5_F1	0	54	CD8
TGCAGTGCTACCTCCCTGGACAGGGAACCTTTATCACTGGGCAATGAGCAGTTCTTC	peak5	M1_v2_5_F1	2.03099e-06	55	CD8
TGCAGTGCTACTCGACTAGCGGGGGGGTCTTACAATGAGCAGTTCTTC	peak5	M1_v2_5_F1	8.12396e-06	56	CD4
TGCAGTGCTAGAAGCTCCGGGACAGGGGCTGGAAACACCATATATTTT	peak0	M1_v2_5_F1	0	57	CD4
TGCAGTGCTAGAGAAGACTTGACAGGGACCTACAATGAGCAGTTCTTC	peak0	M1_v2_5_F1	0	59	CD8
TGCAGTGCTAGAGACCGGGACAGGGACTACAATGAGCAGTTCTTC	peak0	M1_v2_5_F1	0	60	CD8
TGCAGTGCTAGAGACTTCATCCGCACAGATACGCAGTATTTT	peak0	M1_v2_5_F1	0	61	CD8
TGCAGTGCTAGAGATGAGGGTTCTAACACCATATATTTT	peak45	M1_v2_5_F1	0	63	CD8
TGCAGTGCTAGAGATTACGGCAGAGCCATATATGGCTACACCTTC	peak0	M1_v2_5_F1	0	64	CD4
TGCAGTGCTAGAGCACAGGGGGACTATGGCTACACCTTC	peak10	M1_v2_5_F1	0	65	CD4
TGCAGTGCTAGAGGACTAGCGGGGGCCTTAGGCGTTGGCGAGCAGTACTTC	peak5	M1_v2_5_F1	7.10846e-06	66	CD8
TGCAGTGCTAGAGGGGGACAGGGGGCTCCAGGGTGGTCCTACAATGAGCAGTTCTTC	peak5	M1_v2_5_F1	1.92944e-05	67	CD4
TGCAGTGCTAGATTCGGCGGTGCCACAGATACGCAGTATTTT	peak45	M1_v2_5_F1	0	68	CD4
TGCAGTGCTAGCACACAGGGAGCTTACGAGCAGTACGTC	peak0	M1_v2_5_F1	0	69	CD8
TGCAGTGCTAGCCAGGCCGCGGCCTACGAGCAGTACTTC	peak45	M1_v2_5_F1	0	70	CD8
TGCAGTGCTAGCCTTAGCGGGGGGGCCGGGGGTGAGCAGTTCTTC	peak0	M1_v2_5_F1	0	71	CD8
TGCAGTGCTAGCGGAAGACTAGACGGATCCTACGAGCAGTACTTC	peak0	M1_v2_5_F1	0	72	CD8
TGCAGTGCTAGCGTGTGGGGGGGCCCCGGGGAGCTGTTTTTT	peak15	M1_v2_5_F1	5.07747e-06	73	CD4
TGCAGTGCTAGGCCCGACAGCAGCTCCTACGAGCAGTACTTC	peak15	M1_v2_5_F1	0	74	CD4
TGCAGTGCTAGGGCTAGCGGGGGCCCTGTCCCATACACAGATACGCAGTATTTT	peak15	M1_v2_5_F1	0	75	CD4
TGCAGTGCTAGGGCTTGGGGAGGGGGCGGTAGAATAGATGGAAACACCATATATTTT	peak10	M1_v2_5_F1	3.04648e-06	76	CD8
TGCAGTGCTAGGGGGGCTAGCACCGGGGGCACCGGGGAGCTGTTTTTT	peak0	M1_v2_5_F1	0	77	CD4
TGCAGTGCTAGGGTAGGACAGGGGCCTTCAGATACGCAGTATTTT	peak5	M1_v2_5_F1	2.03099e-06	78	CD4
TGCAGTGCTAGGTTCGCACAGGGTACCAATGAGCAGTTCTTC	peak5	M1_v2_5_F1	1.01549e-06	79	CD4
TGCAGTGCTAGTGAAGGGACTAGCGGGGGGGCGTACGAGCAGTACGTC	peak10	M1_v2_5_F1	0	80	CD8
TGCAGTGCTAGTGAGGGAACTTCCTACGAGCAGTACTTC	peak5	M1_v2_5_F1	0	81	CD8
TGCAGTGCTATCCTAGCGGGGAATCAAGAGACCCAGTACTTC	peak45	M1_v2_5_F1	1.01549e-06	82	CD4
TGCAGTGCTCCACGGACACCAGGGCCAGACAATGAGCAGTTCTTC	peak0	M1_v2_5_F1	1.01549e-06	83	CD4
TGCAGTGCTCCAGACAGGCGTAACACCGGGGAGCTGTTTTTT	peak10	M1_v2_5_F1	0	84	CD4
TGCAGTGCTCCCACTAGCGGGGGTCACAATGAGCAGTTCTTC	peak45	M1_v2_5_F1	0	85	CD8
TGCAGTGCTCCCGGACAGCTCTTGGGGGAGACCCAGTACTTC	peak10	M1_v2_5_F1	0	86	CD8
TGCAGTGCTCCCTGGGGCGCGGGGACTGAAGCTTTCTTT	peak0	M1_v2_5_F1	1.01549e-06	87	CD8
TGCAGTGCTCCGACTAGCGGGGGGGCTAATGAGCAGTTCTTC	peak10	M1_v2_5_F1	0	88	CD8
TGCAGTGCTCCGACTGGCGGGGGGTCCAACGAGCAGTACTTC	peak10	M1_v2_5_F1	4.06198e-06	89	CD8
TGCAGTGCTGAGAAAGAGTCGTGGAACGAGCAGTTCTTC	peak5	M1_v2_5_F1	6.09297e-06	90	CD4
TGCAGTGCTGATACAAATACAGGGGCTAGCAATCAGCCCCAGCATTTT	peak0	M1_v2_5_F1	1.01549e-06	91	CD4
TGCAGTGCTGGGGACAGTGTGAATGAGCAGTTCTTC	peak15	M1_v2_5_F1	3.04648e-06	92	CD8
TGCAGTGCTGGGGAGGGCGAGGGCCAGCCCCAGCATTTT	peak45	M1_v2_5_F1	0	93	CD8
TGCAGTGCTGGTACAGGGTTCCTTAATTCACCCCTCCACTTT	peak15	M1_v2_5_F1	0	94	CD8
TGCAGTGCTGTGCGGGGACAGGGAAGTTCGGATACGCAGTATTTT	peak5	M1_v2_5_F1	1.01549e-06	95	CD4
TGCAGTGCTTATGGACAGGGACCAGAAAAACTGTTTTTT	peak0	M1_v2_5_F1	1.01549e-06	96	CD4
TGCAGTGCTTCAGACCGGGACAGGGGAAACTACGAGCAGTACGTC	peak10	M1_v2_5_F1	0	97	CD8
TGCAGTGCTTCGATGGAGGCAGCCAGCACTTACGAGCAGTACTTC	peak5	M1_v2_5_F1	2.03099e-06	98	CD8
TGCAGTGCTTCTGCCGGGACAGAATCCAGCTCCTACGAGCAGTACTTC	peak5	M1_v2_5_F1	0	99	CD8
TGCAGTGGGCAGCCCGAAAGCTCCTACGAGCAGTACTTC	peak45	M1_v2_5_F1	0	100	CD8
TGCAGTGTAGCCGGGACCCCAACCTACGAGCAGTACTTC	peak10	M1_v2_5_F1	0	101	CD4
TGCAGTGTCCAGGGGGAGGTCGGGGAGCTGTTTTTT	peak0	M1_v2_5_F1	1.01549e-06	102	CD4
TGCAGTGTCCCGACTAGCGGGGGCTACAATGAGCAGTTCTTC	peak5	M1_v2_5_F1	0	103	CD8
TGCAGTGTGCGGACAGGGTACAATGAGCAGTTCTTC	peak0	M1_v2_5_F1	0	104	CD4
TGCAGTGTTCCGACTAGCGGGGGGGAAAACATTCAGTACTTC	peak10	M1_v2_5_F1	1.01549e-06	105	CD8
TGCATTCCTACGGGGGCAGGGATCTCTGGAAACACCATATATTTT	peak0	M1_v2_5_F1	0	106	CD8
TGCGCCACTCGGGACAGTGGGAACATTCAGTACTTC	peak0	M1_v2_5_F1	0	107	CD4
TGCGCCAGCAACACCGGAGTAGCGGGGGAGGACTACAATGAGCAGTTCTTC	peak10	M1_v2_5_F1	0	108	CD4
TGCGCCAGCAACGATCCTAGCGGGGGCAAGACCCAGTACTTC	peak15	M1_v2_5_F1	2.03099e-06	109	CD4
TGCGCCAGCACCGAGTAGGAAGCTTTCTTT	peak15	M1_v2_5_F1	0	110	CD8
TGCGCCAGCACTAACCTCGGGACAGGGGCGTTTTACGAGCAGTACTTC	peak45	M1_v2_5_F1	1.01549e-06	111	CD4
TGCGCCAGCAGAACGGACAGGGTGAGGTATGGCTACACCTTC	peak10	M1_v2_5_F1	2.03099e-06	112	CD8
TGCGCCAGCAGAATGGGACAGGGGGCATCAGATACGCAGTATTTT	peak15	M1_v2_5_F1	1.01549e-06	113	CD4
TGCGCCAGCAGAGGAACAGGCGGACCTCAAGAGACCCAGTACTTC	peak0	M1_v2_5_F1	0	114	CD8
TGCGCCAGCAGATCAGGATTCACTGAAGCTTTCTTT	peak45	M1_v2_5_F1	0	115	CD8
TGCGCCAGCAGCAAACACCGGGGGGGCCGGGAATGAGCAGTTCTTC	peak45	M1_v2_5_F1	0	116	CD8
TGCGCCAGCAGCACATTTAATTCACCCCTCCACTTT	peak0	M1_v2_5_F1	3.04648e-06	117	CD8
TGCGCCAGCAGCACCTCCTCGACAGGGGCCTATGGCTACACCTTC	peak0	M1_v2_5_F1	2.03099e-06	118	CD8
TGCGCCAGCAGCACGGACGTTGGGGGCGAGCAGTACTTC	peak10	M1_v2_5_F1	0	119	CD4
TGCGCCAGCAGCACGGAGGGGTCTGGTGGGGCCAACGTCCTGACTTTC	peak5	M1_v2_5_F1	2.03099e-06	120	CD4
TGCGCCAGCAGCACTAGTGGGGAGCTGTTTTTT	peak10	M1_v2_5_F1	0	121	CD4
TGCGCCAGCAGCCAAACAACGGCTCCAACCTACGAGCAGTACTTC	peak0	M1_v2_5_F1	0	122	CD8
TGCGCCAGCAGCCAAACCCTCTCCTACGAGCAGTACTTC	peak15	M1_v2_5_F1	3.04648e-06	123	CD8
TGCGCCAGCAGCCAAACCGAAGGGGGTGCTTATGGCTACACCTTC	peak5	M1_v2_5_F1	5.07747e-06	124	CD8
TGCGCCAGCAGCCAAACTCCGGGACAGGGGGCCGATGAGCAGTTCTTC	peak5	M1_v2_5_F1	0	125	CD4
TGCGCCAGCAGCCAACCGGGACTCTCCTACAATGAGCAGTTCTTC	peak5	M1_v2_5_F1	1.32014e-05	126	CD4
TGCGCCAGCAGCCAACCGTCCACGGACGAGCAGTACTTC	peak5	M1_v2_5_F1	0	127	CD8
TGCGCCAGCAGCCAAGAAAGAAATCTAGCGGGGGGTTATACGCAGTATTTT	peak0	M1_v2_5_F1	4.06198e-06	128	CD4
TGCGCCAGCAGCCAAGAAAGTAACACCGGGGAGCTGTTTTTT	peak5	M1_v2_5_F1	0	129	CD4
TGCGCCAGCAGCCAAGAACGGGCCTACGAGCAGTACTTC	peak10	M1_v2_5_F1	0	130	CD8
TGCGCCAGCAGCCAAGAACTGACCTACGAGCAGTACTTC	peak0	M1_v2_5_F1	0	131	CD8
TGCGCCAGCAGCCAAGACAGGGGAAGGGGCTACACCTTC	peak10	M1_v2_5_F1	5.07747e-06	132	CD4
TGCGCCAGCAGCCAAGACCACAGCCTCTCTCCCCAGCATTTT	peak15	M1_v2_5_F1	1.01549e-06	133	CD8
TGCGCCAGCAGCCAAGACCCCTCCGACACCGGGGAGCTGTTTTTT	peak0	M1_v2_5_F1	0	134	CD8
TGCGCCAGCAGCCAAGACCTGGCGGGGGGGTGGACTGAAGCTTTCTTT	peak5	M1_v2_5_F1	6.09297e-06	135	CD4
TGCGCCAGCAGCCAAGACGACAGGGCCAACGTCTATGGCTACACCTTC	peak5	M1_v2_5_F1	5.07747e-06	136	CD4
TGCGCCAGCAGCCAAGACGGGCGGACAGGGGGCGCCTATGGCTACACCTTC	peak10	M1_v2_5_F1	0	137	CD8
TGCGCCAGCAGCCAAGACGGGGGGCGCAGGGAGACCCAGTACTTC	peak5	M1_v2_5_F1	0	138	CD8
TGCGCCAGCAGCCAAGACGTAGCTAGCTCCTACAATGAGCAGTTCTTC	peak0	M1_v2_5_F1	0	139	CD8
TGCGCCAGCAGCCAAGACTATAGCATCTACCCTCGCGAGCAGTACTTC	peak45	M1_v2_5_F1	1.01549e-06	140	CD4
TGCGCCAGCAGCCAAGACTGGATAAATGAGCAGTTCTTC	peak0	M1_v2_5_F1	0	141	CD8
TGCGCCAGCAGCCAAGACTGGGTCGAGGGAAACTATGGCTACACCTTC	peak0	M1_v2_5_F1	0	142	CD8
TGCGCCAGCAGCCAAGAGCCCGGGACGGGGATTTACAATGAGCAGTTCTTC	peak0	M1_v2_5_F1	0	143	CD8
TGCGCCAGCAGCCAAGAGGCAGGGGGTTCTAACTATGGCTACACCTTC	peak10	M1_v2_5_F1	0	144	CD8
TGCGCCAGCAGCCAAGAGGGAACAGGCAACTATGGCTACACCTTC	peak0	M1_v2_5_F1	0	145	CD8
TGCGCCAGCAGCCAAGAGGTGACGGTAACTTCCTATGGCTACACCTTC	peak0	M1_v2_5_F1	1.01549e-06	146	CD8
TGCGCCAGCAGCCAAGAGGTGCAGGGGAACACCGGGGAGCTGTTTTTT	peak5	M1_v2_5_F1	2.03099e-06	147	CD4
TGCGCCAGCAGCCAAGAGTCAAGCACGGTCTACGAGCAGTACTTC	peak10	M1_v2_5_F1	0	148	CD8
TGCGCCAGCAGCCAAGAGTCCCCGAGCTCCGGGGAGCTGTTTTTT	peak5	M1_v2_5_F1	0	149	CD8
TGCGCCAGCAGCCAAGAGTCGCTGGGTAACTATGGCTACACCTTC	peak0	M1_v2_5_F1	0	150	CD8
TGCGCCAGCAGCCAAGATAACAACCCGGGCTATGGCTACACCTTC	peak10	M1_v2_5_F1	0	151	CD8
TGCGCCAGCAGCCAAGATACCCCTCAGCCCCAGCATTTT	peak10	M1_v2_5_F1	0	152	CD8
TGCGCCAGCAGCCAAGATACCCGGGAACCCCAGCATTTT	peak5	M1_v2_5_F1	7.10846e-06	153	CD4
TGCGCCAGCAGCCAAGATATCATAGTCAACATTCAGTACTTC	peak5	M1_v2_5_F1	3.04648e-06	154	CD4
TGCGCCAGCAGCCAAGATCAAGGCGGACAGGGGGCCTATGGCTACACCTTC	peak10	M1_v2_5_F1	0	155	CD8
TGCGCCAGCAGCCAAGATCAGCCCACCAAGCAGTTCTTC	peak10	M1_v2_5_F1	2.03099e-06	156	CD8
TGCGCCAGCAGCCAAGATCCCCGTACAGGGTTAGGCGATAATGAGCAGTTCTTC	peak5	M1_v2_5_F1	1.01549e-06	157	CD8
TGCGCCAGCAGCCAAGATCGGCGGGACCCCTACGAGCAGTACTTC	peak10	M1_v2_5_F1	1.01549e-06	158	CD8
TGCGCCAGCAGCCAAGATCGGGCAGCCTCTGGAAACACCATATATTTT	peak5	M1_v2_5_F1	0	159	CD4
TGCGCCAGCAGCCAAGATCTTACAGGGGGCGCGTACGAGCAGTACTTC	peak5	M1_v2_5_F1	0	160	CD8
TGCGCCAGCAGCCAAGATGAGCGGTGGTCGGGCTACACCTTC	peak0	M1_v2_5_F1	0	161	CD8
TGCGCCAGCAGCCAAGATGTGGGGCAGCCCCAGCATTTT	peak5	M1_v2_5_F1	4.06198e-06	162	CD4
TGCGCCAGCAGCCAAGATTCCGGGACAGGGGCTTACGAGCAGTACTTC	peak15	M1_v2_5_F1	0	163	CD8
TGCGCCAGCAGCCAAGATTGGGGACAGGGTGACGCTGAAGCTTTCTTT	peak5	M1_v2_5_F1	4.06198e-06	164	CD8
TGCGCCAGCAGCCAAGATTGGTCAGGGGGCCCCTACGAGCAGTACTTC	peak5	M1_v2_5_F1	7.10846e-06	165	CD4
TGCGCCAGCAGCCAAGCAACCGGGACAGCTTATGGCTACACCTTC	peak15	M1_v2_5_F1	0	166	CD8
TGCGCCAGCAGCCAAGCCCTTTTACGGGTGAACACTGAAGCTTTCTTT	peak15	M1_v2_5_F1	2.03099e-06	167	CD4
TGCGCCAGCAGCCAAGCGACAGCCTACGAGCAGTACGTC	peak5	M1_v2_5_F1	5.07747e-06	168	CD8
TGCGCCAGCAGCCAAGCGGACAGGGTTATGAACACTGAAGCTTTCTTT	peak5	M1_v2_5_F1	3.24958e-05	169	CD4
TGCGCCAGCAGCCAAGCTTCGCTGGCGGGTAACACCGGGGAGCTGTTTTTT	peak45	M1_v2_5_F1	1.01549e-06	170	CD8
TGCGCCAGCAGCCAAGGAGGCTATGGCTACACCTTC	peak45	M1_v2_5_F1	0	171	CD8
TGCGCCAGCAGCCAAGGATCCGCAGGGAACCAGCCCCAGCATTTT	peak0	M1_v2_5_F1	0	172	CD8
TGCGCCAGCAGCCAAGGCGAAACGGCAACCACCGGGGAGCTGTTTTTT	peak10	M1_v2_5_F1	0	173	CD8
TGCGCCAGCAGCCAAGGCGGGACAGCGGCATATGGCTACACCTTC	peak45	M1_v2_5_F1	0	174	CD8
TGCGCCAGCAGCCAAGGGGAAGCGGGGGGGCTTTACAATGAGCAGTTCTTC	peak45	M1_v2_5_F1	0	175	CD8
TGCGCCAGCAGCCAAGGGGGACCGGGACAGGGTCCAGATACGCAGTATTTT	peak45	M1_v2_5_F1	0	176	CD4
TGCGCCAGCAGCCAAGGGGGTATGATGAGTCAGCCCCAGCATTTT	peak5	M1_v2_5_F1	2.03099e-06	177	CD8
TGCGCCAGCAGCCAAGGGTCAGGGGTCGGTAATTCACCCCTCCACTTT	peak45	M1_v2_5_F1	0	178	CD8
TGCGCCAGCAGCCAAGGGTCGGACAGGGGGCAGGACGAGCAGTACTTC	peak15	M1_v2_5_F1	0	179	CD8
TGCGCCAGCAGCCAAGGTTATGCGAATAGCATCCATGAGCAGTTCTTC	peak0	M1_v2_5_F1	0	180	CD4
TGCGCCAGCAGCCAAGTAACAGGGGGAAGCTATGGCTACACCTTC	peak0	M1_v2_5_F1	0	181	CD8
TGCGCCAGCAGCCAAGTAACGGAGACAGGGCCGTATGGCTACACCTTC	peak10	M1_v2_5_F1	1.01549e-06	182	CD8
TGCGCCAGCAGCCAAGTAAGCACTGAAGCTTTCTTT	peak0	M1_v2_5_F1	6.09297e-06	183	CD8
TGCGCCAGCAGCCAAGTCCTCTGGTACAATGAGCAGTTCTTC	peak0	M1_v2_5_F1	2.03099e-06	184	CD4
TGCGCCAGCAGCCAAGTGGAAAGTGCGCGAGGAAACATTCAGTACTTC	peak0	M1_v2_5_F1	0	185	CD8
TGCGCCAGCAGCCAAGTTTTCACCAACTCCTACAATGAGCAGTTCTTC	peak15	M1_v2_5_F1	1.01549e-06	186	CD8
TGCGCCAGCAGCCACGGGACAGGGGGCAATCAGCCCCAGCATTTT	peak5	M1_v2_5_F1	0	187	CD8
TGCGCCAGCAGCCACGGGACGGCCTATGGCTACACCTTC	peak5	M1_v2_5_F1	1.01549e-06	188	CD8
TGCGCCAGCAGCCAGACGTGGGCAGGGGCCTTACCCTACGAGCAGTACTTC	peak0	M1_v2_5_F1	0	189	CD8
TGCGCCAGCAGCCAGCTAGCTACGAGCTCCTACGAGCAGTACTTC	peak10	M1_v2_5_F1	7.10846e-06	190	CD8
TGCGCCAGCAGCCAGCTTTCTAGCGGGGGACCACCGAGGAGGGATACGCAGTATTTT	peak0	M1_v2_5_F1	0	191	CD8
TGCGCCAGCAGCCAGGGACCCGGGACAGGAGCCTACGAGCAGTACTTC	peak5	M1_v2_5_F1	0	192	CD8
TGCGCCAGCAGCCAGGGCGGGGCGGGGGGCTCCTACGAGCAGTACTTC	peak10	M1_v2_5_F1	0	193	CD8
TGCGCCAGCAGCCAGTTTGTGAGCTCCTACGAGCAGTACTTC	peak5	M1_v2_5_F1	5.07747e-06	194	CD8
TGCGCCAGCAGCCATGCCGGGCAGGCGACTTTCTTT	peak45	M1_v2_5_F1	0	195	CD8
TGCGCCAGCAGCCATGGGGGTGGAAACACCATATATTTT	peak45	M1_v2_5_F1	1.01549e-06	196	CD8
TGCGCCAGCAGCCCAGCGGGGGACTCCTACGAGCAGTACTTC	peak5	M1_v2_5_F1	3.04648e-06	197	CD8
TGCGCCAGCAGCCCAGGACAGGGGTCCTACGAGCAGTACTTC	peak45	M1_v2_5_F1	0	198	CD8
TGCGCCAGCAGCCCAGTGGCGGGGAGCTCCTACGAGCAGTACTTC	peak0	M1_v2_5_F1	0	199	CD8
TGCGCCAGCAGCCCCGACAGTGGACTCACAGATACGCAGTATTTT	peak0	M1_v2_5_F1	0	200	CD4
TGCGCCAGCAGCCCCGCGGAGGCCTACGAGCAGTACTTC	peak10	M1_v2_5_F1	0	201	CD8
TGCGCCAGCAGCCCCGGGACAGGAGCGGGCTATGGCTACACCTTC	peak10	M1_v2_5_F1	1.01549e-06	202	CD8
TGCGCCAGCAGCCCCTACTCAGGGGGAGGTGAGCAGTTCTTC	peak10	M1_v2_5_F1	0	203	CD8
TGCGCCAGCAGCCCCTCACAGGCCTACGAGCAGTACTTC	peak5	M1_v2_5_F1	0	204	CD8
TGCGCCAGCAGCCCCTCCCGAACGGGGGCCTACGAGCAGTACTTC	peak45	M1_v2_5_F1	1.01549e-06	205	CD8
TGCGCCAGCAGCCCCTCTCCAGGGGAGGCCTATGGCTACACCTTC	peak10	M1_v2_5_F1	9.13945e-06	206	CD8
TGCGCCAGCAGCCCCTTACAGGGAAGCTCCTACGAGCAGTACTTC	peak5	M1_v2_5_F1	3.04648e-06	207	CD4
TGCGCCAGCAGCCCGACAGGGCAAAACGCTGAAGCTTTCTTT	peak0	M1_v2_5_F1	0	208	CD4
TGCGCCAGCAGCCCGACGGAGATTAGGGCCTTC	peak15	M1_v2_5_F1	0	209	CD8
TGCGCCAGCAGCCCGGAGGCAGATTCAACTAATGAAAAACTGTTTTTT	peak5	M1_v2_5_F1	3.04648e-06	210	CD4
TGCGCCAGCAGCCCGGGACAGACCCTAACTATACAAGAGACCCAGTACTTC	peak15	M1_v2_5_F1	2.03099e-06	211	CD4
TGCGCCAGCAGCCCGTCTATGGCAGCGAGCTACGAGCAGTACTTC	peak10	M1_v2_5_F1	1.01549e-06	212	CD8
TGCGCCAGCAGCCCTAGCGGGGGGACCGCCTACGAGCAGTACTTC	peak0	M1_v2_5_F1	3.04648e-06	213	CD8
TGCGCCAGCAGCCCTGCGGCTAGCCTCCTTAACACCGGGGAGCTGTTTTTT	peak5	M1_v2_5_F1	3.04648e-06	214	CD4
TGCGCCAGCAGCCGACAAGTTGGGATATCGAGCACGCCAGATACGCAGTATTTT	peak0	M1_v2_5_F1	1.01549e-06	215	CD4
TGCGCCAGCAGCCGATCGCCCCCGGAACAGGGGGTTGGTCAGCCCCAGCATTTT	peak45	M1_v2_5_F1	0	216	CD4
TGCGCCAGCAGCCGATCGGGACAGCCTTACTACAATGAGCAGTTCTTC	peak10	M1_v2_5_F1	0	217	CD8
TGCGCCAGCAGCCGCGGGGACCCAGCCTACGAGCAGTACTTC	peak45	M1_v2_5_F1	0	218	CD8
TGCGCCAGCAGCCGGAACCCTCGGGACATCTCTGGGGCCAACGTCCTGACTTTC	peak5	M1_v2_5_F1	6.39761e-05	219	CD4
TGCGCCAGCAGCCGGCGGACTAGCGGGGGGGATACAGATACGCAGTATTTT	peak5	M1_v2_5_F1	1.42169e-05	220	CD4
TGCGCCAGCAGCCGGGGACAGCCGAACACTGAAGCTTTCTTT	peak5	M1_v2_5_F1	0	221	CD4
TGCGCCAGCAGCCGGGGAGAGGGTCGGGACAATAGGTCACCCCTCCACTTT	peak45	M1_v2_5_F1	0	222	CD8
TGCGCCAGCAGCCGGGGGGGGGGCTACAATGAGCAGTTCTTC	peak5	M1_v2_5_F1	1.01549e-06	223	CD8
TGCGCCAGCAGCCTAGGGACAGGGGATGAGCAGTTCTTC	peak5	M1_v2_5_F1	1.01549e-06	224	CD8
TGCGCCAGCAGCCTCCTCGAAAACTCTGGAAACACCATATATTTT	peak45	M1_v2_5_F1	1.01549e-06	225	CD4
TGCGCCAGCAGCCTGAGATATAGCACAGATACGCAGTATTTT	peak15	M1_v2_5_F1	0	226	CD8
TGCGCCAGCAGCCTGGCCGAGCGGGCCGGGGAGCTGTTTTTT	peak5	M1_v2_5_F1	8.12396e-06	227	CD4
TGCGCCAGCAGCCTGGGCGGAGCGCGCACAGATACGCAGTATTTT	peak45	M1_v2_5_F1	0	228	CD4
TGCGCCAGCAGCGAGCAGGTCGGGGGGCGATACAATGAGCAGTTCTTC	peak5	M1_v2_5_F1	2.03099e-06	229	CD4
TGCGCCAGCAGCGATGGACAGGGAACAGATACGCAGTATTTT	peak5	M1_v2_5_F1	3.04648e-06	230	CD4
TGCGCCAGCAGCGCCCGAGGAGGCGGGAACACAGATACGCAGTATTTT	peak5	M1_v2_5_F1	1.92944e-05	231	CD4
TGCGCCAGCAGCGGAGGGGGCGAGCAGTACTTC	peak15	M1_v2_5_F1	0	232	CD8
TGCGCCAGCAGCGGGCCCGACTCTGGAAACACCATATATTTT	peak5	M1_v2_5_F1	1.01549e-06	233	CD4
TGCGCCAGCAGCGGGGCGGGGGGGTACGAGCAGTACTTC	peak10	M1_v2_5_F1	2.03099e-06	234	CD8
TGCGCCAGCAGCGTAGTAGGGGGTTTTGAGCAGTTCTTC	peak5	M1_v2_5_F1	0	235	CD4
TGCGCCAGCAGCTACCAAAGGACAGGCGGTGAAGCTTTCTTT	peak5	M1_v2_5_F1	5.07747e-06	236	CD4
TGCGCCAGCAGCTCAACTTACACCGGGGAGCTGTTTTTT	peak10	M1_v2_5_F1	0	237	CD4
TGCGCCAGCAGCTCACAGACAGGCTCAAAAAACATTCAGTACTTC	peak5	M1_v2_5_F1	6.09297e-05	238	CD4
TGCGCCAGCAGCTCCCCTAGCGGGGGTAATGAGCAGTTCTTC	peak5	M1_v2_5_F1	0	239	CD4
TGCGCCAGCAGCTCCCGGATATCGACGCCGCCAGATACGCAGTATTTT	peak5	M1_v2_5_F1	1.01549e-06	240	CD4
TGCGCCAGCAGCTCCGCGGAGGCCTACGAGCAGTACTTC	peak5	M1_v2_5_F1	2.03099e-06	241	CD8
TGCGCCAGCAGCTCGCAATTTTCAGTCGGGACAGGGCAAAACATTCAGTACTTC	peak5	M1_v2_5_F1	0	242	CD4
TGCGCCAGCAGCTCGCCGGACAGCACAGATACGCAGTATTTT	peak5	M1_v2_5_F1	2.13254e-05	243	CD4
TGCGCCAGCAGCTCGGACGTGGGAGGTGAGCAGTTCTTC	peak0	M1_v2_5_F1	0	244	CD4
TGCGCCAGCAGCTCGGGGCAGGGAACCTATGGCTACACCTTC	peak5	M1_v2_5_F1	5.28057e-05	245	CD4
TGCGCCAGCAGCTCGGGTGGACAGGGGGCAGACTATGGCTACACCTTC	peak5	M1_v2_5_F1	6.09297e-06	246	CD8
TGCGCCAGCAGCTGGACTGACAGCGCACCTTTCTACGAGCAGTACTTC	peak5	M1_v2_5_F1	8.12396e-06	247	CD8
TGCGCCAGCAGCTTAAACCTCCTCTCGTCCAATGAGCAGTTCTTC	peak10	M1_v2_5_F1	0	248	CD4
TGCGCCAGCAGCTTACAGGGCGATGAGCAGTTCTTC	peak0	M1_v2_5_F1	0	249	CD4
TGCGCCAGCAGCTTACTAGGGGGGATTCAAGAGACCCAGTACTTC	peak45	M1_v2_5_F1	0	250	CD4
TGCGCCAGCAGCTTATACGTGTCGGCAGATACGCAGTATTTT	peak15	M1_v2_5_F1	5.07747e-06	251	CD4
TGCGCCAGCAGCTTCCAGGGGTCTGAAGCTTTCTTT	peak0	M1_v2_5_F1	0	252	CD4
TGCGCCAGCAGCTTCGACTCTACCGGGGAGCTGTTTTTT	peak0	M1_v2_5_F1	0	253	CD8
TGCGCCAGCAGCTTCGGACAGGACCCAGATACGCAGTATTTT	peak0	M1_v2_5_F1	0	254	CD4
TGCGCCAGCAGCTTCTCGACAGGAACCTACGAGCAGTACTTC	peak5	M1_v2_5_F1	2.03099e-06	255	CD4
TGCGCCAGCAGCTTGATGTCAGGAGAAAATGAGCAGTTCTTC	peak5	M1_v2_5_F1	4.06198e-06	256	CD4
TGCGCCAGCAGCTTGCTATCTGGACAGAGCTCCTACAATGAGCAGTTCTTC	peak5	M1_v2_5_F1	2.03099e-05	257	CD4
TGCGCCAGCAGCTTGGAACAGGGCTATGGCTACACCTTC	peak5	M1_v2_5_F1	2.03099e-06	258	CD4
TGCGCCAGCAGCTTGGAACCCGATCAGCCCCAGCATTTT	peak15	M1_v2_5_F1	4.06198e-06	259	CD4
TGCGCCAGCAGCTTGGAAGGGTCGGGTGGGGCCAACGTCCTGACTTTC	peak0	M1_v2_5_F1	0	260	CD4
TGCGCCAGCAGCTTGGAATACGTAGGGAATTCACCCCTCCACTTT	peak5	M1_v2_5_F1	1.01549e-06	261	CD4
TGCGCCAGCAGCTTGGAATGGGGAACTGGAAACACCATATATTTT	peak0	M1_v2_5_F1	0	262	CD4
TGCGCCAGCAGCTTGGACCCAAACGACTATGGCTACACCTTC	peak45	M1_v2_5_F1	0	263	CD4
TGCGCCAGCAGCTTGGACCCCCCAGATGCAGGAAACACCATATATTTT	peak5	M1_v2_5_F1	3.04648e-06	264	CD4
TGCGCCAGCAGCTTGGACGAAGCCTACGAGCAGTACTTC	peak5	M1_v2_5_F1	3.04648e-06	265	CD8
TGCGCCAGCAGCTTGGACGGAGACCCACTACGGGAGCAGTACGTC	peak10	M1_v2_5_F1	0	266	CD4
TGCGCCAGCAGCTTGGAGAGCACAGATACGCAGTATTTT	peak5	M1_v2_5_F1	0	267	CD4
TGCGCCAGCAGCTTGGAGAGGATGGATCAGCCCCAGCATTTT	peak0	M1_v2_5_F1	0	268	CD4
TGCGCCAGCAGCTTGGAGGCGAGAATCACCTACAATGAGCAGTTCTTC	peak0	M1_v2_5_F1	2.03099e-06	269	CD4
TGCGCCAGCAGCTTGGAGGGGCTGATCTATGGCTACACCTTC	peak5	M1_v2_5_F1	1.01549e-06	270	CD4
TGCGCCAGCAGCTTGGCCAGGGCAAACACCGGGGAGCTGTTTTTT	peak5	M1_v2_5_F1	2.43719e-05	271	CD4
TGCGCCAGCAGCTTGGCCCCAGGGCCCTACGAGCAGTACTTC	peak10	M1_v2_5_F1	4.06198e-06	272	CD4
TGCGCCAGCAGCTTGGCCGAGGCTTACGAGCAGTACTTC	peak15	M1_v2_5_F1	0	273	CD8
TGCGCCAGCAGCTTGGCCGGCGGGGGCGGAGAGACCCAGTACTTC	peak15	M1_v2_5_F1	0	274	CD4
TGCGCCAGCAGCTTGGCCTGGGGAAATCCCACAGATACGCAGTATTTT	peak5	M1_v2_5_F1	0	275	CD4
TGCGCCAGCAGCTTGGCGGACAGGGGGCGTGAAGCTTTCTTT	peak15	M1_v2_5_F1	0	276	CD4
TGCGCCAGCAGCTTGGCGTACCTGAACACTGAAGCTTTCTTT	peak10	M1_v2_5_F1	0	277	CD8
TGCGCCAGCAGCTTGGGAAACGGAGGCGAGCAGTACTTC	peak0	M1_v2_5_F1	0	278	CD4
TGCGCCAGCAGCTTGGGGACAGGTGGCAATCAGCCCCAGCATTTT	peak5	M1_v2_5_F1	3.04648e-06	279	CD8
TGCGCCAGCAGCTTGGGGGACAGCGTAGATCAGCCCCAGCATTTT	peak10	M1_v2_5_F1	0	280	CD4
TGCGCCAGCAGCTTGGGGGACAGTTTAAGGCCCCTCCACTTT	peak15	M1_v2_5_F1	2.03099e-06	281	CD4
TGCGCCAGCAGCTTGGGGGGGGGGCGCAATGAGCAGTTCTTC	peak0	M1_v2_5_F1	0	282	CD4
TGCGCCAGCAGCTTGGTAAGAGGGGCCAACGTCCTGACTTTC	peak5	M1_v2_5_F1	0	283	CD4
TGCGCCAGCAGCTTGGTGGTGGGGGCCAACAATGAGCAGTTCTTC	peak5	M1_v2_5_F1	1.11704e-05	284	CD4
TGCGCCAGCAGCTTTCAGGGGGGCACTGAAGCTTTCTTT	peak15	M1_v2_5_F1	0	285	CD8
TGCGCCAGCAGCTTTCTCGGGGTCGATGGGGAGACCCAGTACTTC	peak5	M1_v2_5_F1	2.03099e-06	286	CD4
TGCGCCAGCAGCTTTGTCAGGCTCCAAGGAAACACTGAAGCTTTCTTT	peak15	M1_v2_5_F1	1.01549e-06	287	CD8
TGCGCCAGCAGCTTTTCCGGGACAGGGAACAATGAGCAGTTCTTC	peak5	M1_v2_5_F1	4.67127e-05	288	CD8
TGCGCCAGCAGGAATCCCCGGAGCTCCTACGAGCAGTACTTC	peak45	M1_v2_5_F1	4.06198e-06	289	CD8
TGCGCCAGCAGGCAGGGACAGGGGGGCTACACCTTC	peak45	M1_v2_5_F1	0	290	CD8
TGCGCCAGCAGGGAAGGGACTAGCGGGGGGCAAAATACGCAGTATTTT	peak5	M1_v2_5_F1	1.01549e-05	291	CD4
TGCGCCAGCAGGGACATGAATTACGAGCAGTACTTC	peak0	M1_v2_5_F1	0	292	CD4
TGCGCCAGCAGGGCGGAGCTATCTATGAACACTGAAGCTTTCTTT	peak5	M1_v2_5_F1	4.36663e-05	293	CD4
TGCGCCAGCAGGTCCGGGACAACGAACTATGGCTACACCTTC	peak0	M1_v2_5_F1	0	294	CD8
TGCGCCAGCAGTAACCTAGCGGGGGGGGAAGAGACCCAGTACTTC	peak5	M1_v2_5_F1	0	295	CD4
TGCGCCAGCAGTCAACCAGGACAGGGGCCCCCTACGAGCAGTACTTC	peak15	M1_v2_5_F1	0	296	CD8
TGCGCCAGCAGTCAAGAGGCAGCCAGCTCCTATAATTCACCCCTCCACTTT	peak0	M1_v2_5_F1	0	297	CD8
TGCGCCAGCAGTCAATCCCCGTGGTCCAGGGGGGTATAGCTGTTTTTT	peak10	M1_v2_5_F1	2.03099e-06	298	CD8
TGCGCCAGCAGTCCCTAGGGAGGAGGGCCTGAGAGCAGTACTTC	peak0	M1_v2_5_F1	0	299	CD8
TGCGCCAGCAGTCTCTTAGCACAGATACGCAGTATTTT	peak45	M1_v2_5_F1	0	300	CD8
TGCGCCAGCAGTCTTGAGGTAGGCACTGAAGCTTTCTTT	peak15	M1_v2_5_F1	0	301	CD8
TGCGCCAGCAGTGAGATCCGAGGGACAGGGTCCCACGAGCAGTACTTC	peak45	M1_v2_5_F1	1.01549e-06	302	CD8
TGCGCCAGCAGTGAGGAGGAGGTAGCCTACGAGCAGTACTTC	peak15	M1_v2_5_F1	0	303	CD8
TGCGCCAGCAGTGAGGGAAGGACAGGGGACTACAATGAGCAGTTCTTC	peak5	M1_v2_5_F1	2.33564e-05	304	CD4
TGCGCCAGCAGTGAGTCGGGGACTAGCGAATACAATGAGCAGTTCTTC	peak5	M1_v2_5_F1	3.04648e-05	305	CD4
TGCGCCAGCAGTGCTACGGGTGCCTACGAGCAGTACTTC	peak0	M1_v2_5_F1	0	306	CD8
TGCGCCAGCAGTGTTGAGCGGGAAACTTACGAGCAGTACTTC	peak45	M1_v2_5_F1	0	307	CD8
TGCGCCAGCAGTTAACAGGGGGCAATCGGGGAGCTGTTTTTT	peak15	M1_v2_5_F1	0	308	CD8
TGCGCCAGCCGACGGACAGCAGGAGCCCACAGCCCCAGCATTTT	peak5	M1_v2_5_F1	3.04648e-06	309	CD8
TGCGCCAGCCGGCGGGAGGGAACGATGAACACTGAAGCTTTCTTT	peak5	M1_v2_5_F1	1.01549e-06	310	CD4
TGCGCCAGCCGGGACGGAGCCTACGAGCAGTACTTC	peak5	M1_v2_5_F1	5.07747e-06	311	CD4
TGCGCCAGCCGGGGAGGGGGACAGGGGATACAGAACTATGGCTACACCTTC	peak10	M1_v2_5_F1	0	312	CD8
TGCGCCAGCCTTGGCGAGGGGAGAAGCACCGGGGAGCTGTTTTTT	peak0	M1_v2_5_F1	0	313	CD8
TGCGCCAGCGGGGTCGGAACCTACAATGAGCAGTTCTTC	peak5	M1_v2_5_F1	2.03099e-06	314	CD4
TGCGCCAGCTCCCCATGGCGGGGGGCCTACAATGAGCAGTTCTTC	peak15	M1_v2_5_F1	0	315	CD8
TGCGCCAGCTTAGGTCCGAATAATTCACCCCTCCACTTT	peak15	M1_v2_5_F1	0	316	CD8
TGCTCCCAGGGGGACAGGGGTCTTAACACTGAAGCTTTCTTT	peak10	M1_v2_5_F1	0	317	CD8
TGTGCCAACTAGCACCCGGGGCTCATCTTCAATCAGCCCCAGCATTTT	peak0	M1_v2_5_F1	0	318	CD4
TGTGCCAATACGGGACTGAACACCGGGGAGCTGTTTTTT	peak5	M1_v2_5_F1	0	319	CD8
TGTGCCACACTATCCGGGACAACGAACACCGGGGAGCTGTTTTTT	peak10	M1_v2_5_F1	4.06198e-06	320	CD4
TGTGCCACAGGCCGGTCCTCGACCTACGAGCAGTACTTC	peak0	M1_v2_5_F1	0	321	CD8
TGTGCCACCAAACCGGGCCCCGGTTCGCCCCAGCATTTT	peak45	M1_v2_5_F1	0	322	CD4
TGTGCCACCACGGAGGGGGGGGCCTACGAGCAGTACTTC	peak5	M1_v2_5_F1	1.01549e-06	323	CD8
TGTGCCACCACTAACCGACCCTCTGGGGCCAACGTCCTGACTTTC	peak45	M1_v2_5_F1	1.01549e-06	324	CD8
TGTGCCACCAGCACCCGGGCCGCCGGCGAGCAGTACTTC	peak0	M1_v2_5_F1	0	325	CD8
TGTGCCACCAGCACCGCAACAGGGGGATACGAGCAGTACTTC	peak15	M1_v2_5_F1	0	326	CD8
TGTGCCACCAGCACCGCCGAGAACTATGGCTACACCTTC	peak5	M1_v2_5_F1	2.03099e-06	327	CD8
TGTGCCACCAGCACGGGCTTGGCCTACGAGCAGTACGTC	peak15	M1_v2_5_F1	7.10846e-06	328	CD8
TGTGCCACCAGCAGAACCGACAGGATCCTCATCGAGCAGTACTTC	peak0	M1_v2_5_F1	0	329	CD8
TGTGCCACCAGCAGACAGGCGAATACAGATACGCAGTATTTT	peak0	M1_v2_5_F1	3.04648e-06	330	CD8
TGTGCCACCAGCAGAGAGGAAAGGAGGGCTAATGAAAAACTGTTTTTT	peak10	M1_v2_5_F1	0	331	CD8
TGTGCCACCAGCAGAGAGGTCGCGGGTTACAATGAGCAGTTCTTC	peak0	M1_v2_5_F1	0	332	CD4
TGTGCCACCAGCAGAGATCAAGAGGGAGCCAATCAGCCCCAGCATTTT	peak10	M1_v2_5_F1	1.01549e-06	333	CD8
TGTGCCACCAGCAGAGATCGACCAGGCCAGCCCCAGCATTTT	peak45	M1_v2_5_F1	2.03099e-06	334	CD8
TGTGCCACCAGCAGAGATCTCCCGACAGGACGACAAGAGACCCAGTACTTC	peak0	M1_v2_5_F1	0	335	CD8
TGTGCCACCAGCAGAGATGCGGACGGGCCCAGATCACCCCTCCACTTT	peak5	M1_v2_5_F1	1.01549e-06	336	CD4
TGTGCCACCAGCAGAGATTCCCCCATACTCAGCATTCAGTACTTC	peak5	M1_v2_5_F1	9.13945e-06	337	CD4
TGTGCCACCAGCAGAGATTGGCTAGCGGGGGGGCAAGAGACCCAGTACTTC	peak5	M1_v2_5_F1	2.03099e-06	338	CD8
TGTGCCACCAGCAGAGCCCCACTAGCGGGGGGTAATGAGCAGTTCTTC	peak10	M1_v2_5_F1	0	339	CD8
TGTGCCACCAGCAGAGCCCCAGGGTACGAGCAGTACGTC	peak10	M1_v2_5_F1	1.01549e-06	340	CD8
TGTGCCACCAGCAGAGCCCCCCTAGCGGGGGGCAATGAGCAGTTCTTC	peak5	M1_v2_5_F1	3.04648e-06	341	CD8
TGTGCCACCAGCAGAGCCGGGGCCTACGAGCAGTACTTC	peak15	M1_v2_5_F1	5.07747e-06	342	CD8
TGTGCCACCAGCAGAGCGACAGGGGCTCAGCCCCAGCATTTT	peak45	M1_v2_5_F1	0	343	CD8
TGTGCCACCAGCAGAGCGACGGGCGCTGAAGCTTTCTTT	peak0	M1_v2_5_F1	0	344	CD8
TGTGCCACCAGCAGAGCGAGCCTCACAGATACGCAGTATTTT	peak0	M1_v2_5_F1	0	345	CD8
TGTGCCACCAGCAGAGCGGACCCTGCCTACGAGCAGTACTTC	peak0	M1_v2_5_F1	0	346	CD8
TGTGCCACCAGCAGAGCGGCAGGTTCCTACGAGCAGTACTTC	peak5	M1_v2_5_F1	2.03099e-06	347	CD8
TGTGCCACCAGCAGAGCGGTAGCGGGGGGCAATGAGCAGTTCTTC	peak5	M1_v2_5_F1	3.04648e-06	348	CD4
TGTGCCACCAGCAGAGCTATGAACACTGAAGCTTTCTTT	peak15	M1_v2_5_F1	7.10846e-06	349	CD8
TGTGCCACCAGCAGAGGACAGAGAACCTACGAGCAGTACTTC	peak45	M1_v2_5_F1	0	350	CD8
TGTGCCACCAGCAGAGGACAGCTCTACGAGCAGTACTTC	peak0	M1_v2_5_F1	0	351	CD8
TGTGCCACCAGCAGAGGACAGGCCTACGAGCAGTACGTC	peak5	M1_v2_5_F1	0	352	CD8
TGTGCCACCAGCAGAGGACAGGCGGGCGGTAATTCACCCCTCCACTTT	peak5	M1_v2_5_F1	1.01549e-06	353	CD8
TGTGCCACCAGCAGAGGACAGGGGCGGACCTACGAGCAGTACTTC	peak45	M1_v2_5_F1	0	354	CD8
TGTGCCACCAGCAGAGGACAGGGGTACGAGCAGTACTTC	peak15	M1_v2_5_F1	0	355	CD8
TGTGCCACCAGCAGAGGACAGGGTTACGAGCAGTACGTC	peak0	M1_v2_5_F1	0	356	CD8
TGTGCCACCAGCAGAGGACAGGTCTCCTACAATGAGCAGTTCTTC	peak10	M1_v2_5_F1	0	357	CD8
TGTGCCACCAGCAGAGGACTAGTTGGTTCCTACAATGAGCAGTTCTTC	peak10	M1_v2_5_F1	0	358	CD8
TGTGCCACCAGCAGAGGAGAAAACACTGAAGCTTTCTTT	peak10	M1_v2_5_F1	5.07747e-06	359	CD8
TGTGCCACCAGCAGAGGAGGAGGGTACGAGCAGTACTTC	peak45	M1_v2_5_F1	1.01549e-06	360	CD8
TGTGCCACCAGCAGAGGCAAGGGCTCCTACAATGAGCAGTTCTTC	peak0	M1_v2_5_F1	0	361	CD8
TGTGCCACCAGCAGAGGCCAGAGACTCTACGAGCAGTACTTC	peak45	M1_v2_5_F1	0	362	CD8
TGTGCCACCAGCAGAGGCCGGAGCTCCTACAATGAGCAGTTCTTC	peak15	M1_v2_5_F1	1.01549e-06	363	CD8
TGTGCCACCAGCAGAGGGATTTCCTACGAGCAGTACGTC	peak10	M1_v2_5_F1	0	364	CD8
TGTGCCACCAGCAGAGGGGAATCCTACGAGCAGTACTTC	peak10	M1_v2_5_F1	0	365	CD8
TGTGCCACCAGCAGAGGGGCAGCTTATAGCAATCAGCCCCAGCATTTT	peak0	M1_v2_5_F1	0	366	CD8
TGTGCCACCAGCAGAGGGGGGGCCTACGAGCAGTACTTC	peak5	M1_v2_5_F1	2.03099e-06	367	CD8
TGTGCCACCAGCAGAGGGTCCGGGACAGGGGCCTACGAGCAGTACTTC	peak15	M1_v2_5_F1	1.01549e-06	368	CD8
TGTGCCACCAGCAGAGGTCAACAGCCGTTGGACTATGGCTACACCTTC	peak45	M1_v2_5_F1	0	369	CD8
TGTGCCACCAGCAGAGTAGCCTACGCGTCTCAAGAGACCCAGTACTTC	peak10	M1_v2_5_F1	0	370	CD8
TGTGCCACCAGCAGAGTCGAACTTCGCCAAGGGTCCCAGTACTTC	peak0	M1_v2_5_F1	9.13945e-06	371	CD8
TGTGCCACCAGCAGATCCCCAGGGCTCGAGCAGTACGTC	peak0	M1_v2_5_F1	0	372	CD8
TGTGCCACCAGCAGATCGCTTGGCTACGAGCAGTACTTC	peak0	M1_v2_5_F1	0	373	CD8
TGTGCCACCAGCAGCGGACAGAGGAATTACAATGAGCAGTTCTTC	peak0	M1_v2_5_F1	1.01549e-06	374	CD8
TGTGCCACCAGCAGCGGGACAGGACCCTACGAGCAGTACGTC	peak0	M1_v2_5_F1	0	375	CD8
TGTGCCACCAGCAGCGGGACAGGTCCCTACGAGCAGTACTTC	peak5	M1_v2_5_F1	1.01549e-06	376	CD8
TGTGCCACCAGCAGCGGGACCGCATACGAGCAGTACGTC	peak5	M1_v2_5_F1	6.09297e-06	377	CD8
TGTGCCACCAGCAGGACAGGAGGGCATGAGCAGTTCTTC	peak0	M1_v2_5_F1	0	378	CD8
TGTGCCACCAGCAGGGGACTAGCCTACAATGAGCAGTTCTTC	peak10	M1_v2_5_F1	0	379	CD8
TGTGCCACCAGCAGGGGACTAGCGGGGGCCTACAATGAGCAGTTCTTC	peak0	M1_v2_5_F1	0	380	CD8
TGTGCCACCAGCAGGGGCGGAGGGTACGAGCAGTACTTC	peak0	M1_v2_5_F1	0	381	CD8
TGTGCCACCAGCAGGGGGATTTCGGGGCCATACAATGAGCAGTTCTTC	peak10	M1_v2_5_F1	0	382	CD8
TGTGCCACCAGCAGGGGTCTTAGCTCCTACAATGAGCAGTTCTTC	peak5	M1_v2_5_F1	1.01549e-06	383	CD8
TGTGCCACCAGCAGGGGTGGACAGGGTGGTAATTCACCCCTCCACTTT	peak10	M1_v2_5_F1	0	384	CD8
TGTGCCACCAGCAGGTCAGGGGGCACTGAAGCTTTCTTT	peak10	M1_v2_5_F1	0	385	CD8
TGTGCCACCAGCAGGTCCAAAGCCTACGAGCAGTACTTC	peak0	M1_v2_5_F1	0	386	CD8
TGTGCCACCAGCAGGTTAGCGGGGGAACAAGAGACCCAGTACTTC	peak10	M1_v2_5_F1	1.01549e-06	387	CD8
TGTGCCACCAGCAGTAAACTTACGATTACGGAGCAGTTCTTC	peak45	M1_v2_5_F1	1.01549e-06	388	CD8
TGTGCCACCAGCAGTGCTCCGGGGCCTTACGAGCAGTACTTC	peak0	M1_v2_5_F1	0	389	CD8
TGTGCCACCAGCAGTGGGACAGCCTACGAGCAGTACTTC	peak10	M1_v2_5_F1	2.03099e-06	390	CD8
TGTGCCACCAGCATCCTGGAAATAGGGTCAGATACGCAGTATTTT	peak10	M1_v2_5_F1	0	391	CD8
TGTGCCACCAGCATGGCGAGCAATCAGCCCCAGCATTTT	peak45	M1_v2_5_F1	0	392	CD8
TGTGCCACCAGCCAGGGGGGGGCCTACGAGCAGTACTTC	peak15	M1_v2_5_F1	1.01549e-06	393	CD8
TGTGCCACCAGCCCCGACAGGGGGCCTTACGAGCAGTACTTC	peak0	M1_v2_5_F1	0	394	CD8
TGTGCCACCAGCCCCTCAGCAGGGGGCTATGGCTACACCTTC	peak5	M1_v2_5_F1	0	395	CD8
TGTGCCACCAGCCGAGGACAGAGCGGCTACAATGAGCAGTTCTTC	peak15	M1_v2_5_F1	0	396	CD8
TGTGCCACCAGCCGCGCAGGGGCCTACGAGCAGTACGTC	peak10	M1_v2_5_F1	0	397	CD8
TGTGCCACCAGCCGCGGGGACGGTACCTACGAGCAGTACGTC	peak15	M1_v2_5_F1	1.01549e-06	398	CD8
TGTGCCACCAGCCGTGGTGTAGGGTTTTACGAGCAGTACGTC	peak0	M1_v2_5_F1	0	399	CD8
TGTGCCACCAGCGCCAGCACAGGGCTTGAGCAGTTCTTC	peak10	M1_v2_5_F1	4.06198e-06	400	CD8
TGTGCCACCAGCGCCCAACAGGGAGCCGGGGAGCTGTTTTTT	peak0	M1_v2_5_F1	0	401	CD8
TGTGCCACCAGCGCTGGGCCGGAGATGTACGAGCAGTACTTC	peak0	M1_v2_5_F1	6.60071e-05	402	CD8
TGTGCCACCAGCGGACGGCCAGCCGACGAGCAGTACTTC	peak0	M1_v2_5_F1	0	403	CD8
TGTGCCACCAGCGGAGGGGGCGGGTACGAGCAGTACGTC	peak45	M1_v2_5_F1	0	404	CD8
TGTGCCACCAGCGGAGGGGTGGGTTACGAGCAGTACGTC	peak15	M1_v2_5_F1	1.01549e-06	405	CD8
TGTGCCACCAGCGGATCTACAGGTCAGCCCCAGCATTTT	peak45	M1_v2_5_F1	0	406	CD8
TGTGCCACCAGCGGGGCCACTGGGGGATATGAGCAGTTCTTC	peak0	M1_v2_5_F1	0	407	CD8
TGTGCCACCAGCGGGTCCGGCAACTACGAGCAGTACTTC	peak10	M1_v2_5_F1	1.11704e-05	408	CD8
TGTGCCACCAGCGTGACAGGGGGGAATTCACCCCTCCACTTT	peak15	M1_v2_5_F1	2.03099e-06	409	CD8
TGTGCCACCAGCTCCCGGGCAATGCCTGCCCTAGATACGCAGTATTTT	peak5	M1_v2_5_F1	0	410	CD8
TGTGCCACCAGTCCTGGTACGGCCTACGAGCAGTACTTC	peak0	M1_v2_5_F1	1.11704e-05	411	CD8
TGTGCCACCAGTCGGGGAGCAGATACGCAGTATTTT	peak5	M1_v2_5_F1	3.04648e-06	412	CD8
TGTGCCACCAGTGACAGCCAACTAGCGGGGGGCCACAATGAGCAGTTCTTC	peak10	M1_v2_5_F1	1.01549e-06	413	CD8
TGTGCCACCAGTGAGCCCGGGACAGCAGATACGCAGTATTTT	peak0	M1_v2_5_F1	0	414	CD8
TGTGCCACCAGTGATCCGGGACAGGGTGAGAATGAGCAGTTCTTC	peak5	M1_v2_5_F1	9.13945e-06	415	CD4
TGTGCCACCAGTGATTTCACTAGCACAGATACGCAGTATTTT	peak0	M1_v2_5_F1	0	416	CD8
TGTGCCACCAGTGGCCCCGACGAGGCTTCACCCCTCCACTTT	peak5	M1_v2_5_F1	7.10846e-06	417	CD8
TGTGCCACCAGTTATGAGAGGAACACTGAAGCTTTCTTT	peak10	M1_v2_5_F1	6.09297e-06	418	CD8
TGTGCCACCAGTTCCGGGGGGGCCCCCTACAATGAGCAGTTCTTC	peak45	M1_v2_5_F1	2.33564e-05	419	CD8
TGTGCCACCCAGGGGGCAGCCGGGGAGCTGTTTTTT	peak45	M1_v2_5_F1	0	420	CD8
TGTGCCACCCCGACCGATACGCAGTATTTT	peak0	M1_v2_5_F1	0	421	CD8
TGTGCCACCCTAGCGGGGGGCAGCTACGAGCAGTACTTC	peak15	M1_v2_5_F1	0	422	CD8
TGTGCCACCGACCCGTGGAACACCGGGGAGCTGTTTTTT	peak5	M1_v2_5_F1	0	423	CD4
TGTGCCACCGCCCCGGGACAGGGTGTTTTTCATGAGCAGTTCTTC	peak15	M1_v2_5_F1	0	424	CD8
TGTGCCACCGCGATGGGGGCGGCTAACAATGAGCAGTTCTTC	peak0	M1_v2_5_F1	0	425	CD8
TGTGCCACCGGAGTCAGTGCGAAACCAGATACGCAGTATTTT	peak0	M1_v2_5_F1	0	426	CD8
TGTGCCACCTCAGGGGCGGGTAATCAGCCCCAGCATTTT	peak5	M1_v2_5_F1	0	427	CD4
TGTGCCACCTCAGGGGGTGGCAATCAGCCCCAGCATTTT	peak5	M1_v2_5_F1	3.04648e-06	428	CD4
TGTGCCACCTCTGGGGCCGCGTCCTACGAGCAGTACTTC	peak0	M1_v2_5_F1	0	429	CD8
TGTGCCACCTTCCCGCCGGAGTCTATCACAGATACGCAGTATTTT	peak5	M1_v2_5_F1	3.04648e-06	430	CD4
TGTGCCACGAGCGCCTCTACAGCCGATGAGCAGTTCTTC	peak10	M1_v2_5_F1	0	431	CD8
TGTGCCACTGGGATGTGGGGGAATGAGCAGTTCTTC	peak15	M1_v2_5_F1	0	432	CD8
TGTGCCACTTGCCCGGCAGCCAATCAGCCCCAGCATTTT	peak0	M1_v2_5_F1	0	433	CD8
TGTGCCAGACAGCCTAACTATGGCTACACCTTC	peak15	M1_v2_5_F1	1.01549e-06	434	CD8
TGTGCCAGAGTCGTCGGGAATACAGGGCCCCCCTTTGCAACTAATGAAAAACTGTTTTTT	peak5	M1_v2_5_F1	0	435	CD8
TGTGCCAGCAAAACAGGGGCTTCACCCCTCCACTTT	peak5	M1_v2_5_F1	1.01549e-05	436	CD4
TGTGCCAGCAAAATCGGGGGGGCGGCAGATACGCAGTATTTT	peak5	M1_v2_5_F1	3.04648e-06	437	CD4
TGTGCCAGCAAAGGACAGGGGGCGCTTAATGAGCAGTTCTTC	peak5	M1_v2_5_F1	2.03099e-06	438	CD4
TGTGCCAGCAAAGGACTAGCGGGGGCCCAAAGCTCCTACAATGAGCAGTTCTTC	peak0	M1_v2_5_F1	1.01549e-06	439	CD4
TGTGCCAGCAAAGTTATGGGGGCGGAGGATACGCAGTATTTT	peak5	M1_v2_5_F1	5.07747e-06	440	CD4
TGTGCCAGCAACCAAGCGGGGGGAGTGGCAGAGACCCAGTACTTC	peak0	M1_v2_5_F1	0	441	CD8
TGTGCCAGCAACCCCCCAGGCTACAATGAGCAGTTCTTC	peak10	M1_v2_5_F1	0	442	CD8
TGTGCCAGCAACCCCGCGGGGGGCGAGACCCAGTACTTC	peak5	M1_v2_5_F1	1.01549e-06	443	CD8
TGTGCCAGCAACCGCGGGGGGGCAAATGAGCAGTTCTTC	peak0	M1_v2_5_F1	0	444	CD8
[truncated: 5,796 more rows]
