# Supplementary material for: Primary and secondary anti-viral response captured by the dynamics and phenotype of individual T cell clones
Source: eLife journal article supplement (doi:10.7554/elife.53704), 2020-02-21
Supplement: supp [file elife-53704-supp-v1.zip › elife_poa_e53704_Figure_2_source_data_2.csv]

CDR3	max	variable	value	id	phen
TGTGCCAGCAATAAAGCTTATGAGGGCTACACCTTC	peak5	P30_0_F1	0	1	CD8
TGCGCCAGCAGCTTGGCGTCGGGAGGTTCCTACGAGCAGTACTTC	peak5	P30_0_F1	0	2	CD8
TGCGCCAGCAGCTTAGGTGCGGAACTATACGAGCAGTACTTC	peak10	P30_0_F1	1,13E-05	3	CD4
TGCAGCGTTGGCCTCGGCAGCCAAACTGAAGCTTTCTTT	peak10	P30_0_F1	0	4	CD8
TGTGCCAGCAGTTTTCGGCCCCTCATGAACCATCGGCAAGAGACCCAGTACTTC	peak10	P30_0_F1	0	5	CD4
TGTGCCGTAAAAGATGACGCCAATGAGCAGTTCTTC	peak10	P30_0_F1	0	6	CD8
TGCGCCAGCAGCTTGGCGGCTAGCGGGAGCTACGAGCAGTACTTC	peak10	P30_0_F1	0	7	CD8
TGCAGTGCTAGCCTGACTAGCGGGAGGGCCGACGAGCAGTACTTC	peak10	P30_0_F1	0	8	CD8
TGCGCCAGCAGCGGGGGTCTCCGGGGCACTGAAGCTTTCTTT	peak15	P30_0_F1	6,45E-06	9	CD4
TGCGCCAGCAGCTTGGGCAGGGGGCTCTACGAGCAGTACTTC	peak10	P30_0_F1	3,22E-06	10	CD4
TGTGCCAGCAGCCCGCGACAGTCCTCGTTCACAGATACGCAGTATTTT	peak10	P30_0_F1	8,06E-07	11	CD4
TGCAGTGCTAGAGTATGGGACGGCAACACTGTCGGATCGTGGGAGACCCAGTACTTC	peak5	P30_0_F1	0	12	CD8
TGCGCCAGCAGTCTCGGACAGGGTCTCTACGAGCAGTACTTC	peak10	P30_0_F1	1,61E-06	13	CD4
TGTGCCAGCATGAAAGATAGAGGCTACACCTTC	peak10	P30_0_F1	0	14	CD8
TGTGCCAGCAGCTCATATCGGACAGGAGCCTACGAGCAGTACTTC	peak10	P30_0_F1	8,06E-07	15	CD4
TGCGCCAGCAGCTCCTCCGGGACAATCCGTAATGAGCAGTTCTTC	peak10	P30_0_F1	1,61E-06	16	CD4
TGTGCCAGCAGCCCTCGGACTAGCGGAGCGGATCAAGAGACCCAGTACTTC	peak10	P30_0_F1	0	17	CD8
TGCGCCAGCAGCTTGGGACAGGGGTTGTACGAGCAGTACTTC	peak10	P30_0_F1	3,22E-06	18	CD4
TGCGCCAGCAGCTTGGGCAGGGGCTTATACGAGCAGTACTTC	peak10	P30_0_F1	1,61E-06	19	CD4
TGTGCCAGCAGCCTCCGGACTAGCGGGAGAAATGAGCAGTTCTTC	peak10	P30_0_F1	0	20	CD8
TGCGCCAGCAGCCTCTTGGAGGCTCCTTACGAGCAGTACTTC	peak10	P30_0_F1	0	21	CD8
TGCGCCAGCAGCCACAGGGGGGGGGGCGCTTACAATGAGCAGTTCTTC	peak10	P30_0_F1	0	23	CD8
TGTGCCAGCCGCCCAGGGAATGAGCAGTTCTTC	peak10	P30_0_F1	1,61E-06	24	CD4
TGCAGTGCTAGCACGGGACTAGCGGGAGGCCCCTCCGATTACGAGCAGTACTTC	peak15	P30_0_F1	0	25	CD4
TGTGCCAGCAGTCCCGGACAGGGAGTCTACGAGCAGTACTTC	peak10	P30_0_F1	0	26	CD4
TGCAGTGCTAGACCTACCACCCTGAGGGAGACCCAGTACTTC	peak10	P30_0_F1	0	27	CD4
TGCAGTGCCCCCAGGGGAGGGAATATGGGTGAAGCTTTCTTT	peak10	P30_0_F1	0	28	CD4
TGTGCCACCAGCAGAGCTCCCGGATACGAGCAGTACTTC	peak15	P30_0_F1	0	29	CD8
TGTGCCAGCAGGGCCCTAGCGGGGGGGGACAATGAGCAGTTCTTC	peak10	P30_0_F1	0	30	CD8
TGTGCCAGCAGCCTTGATGCAGCCGAGGCCACCGGGGAGCTGTTTTTT	peak10	P30_0_F1	0	31	CD4
TGTGCCAGCAGCTTAAACCCTGACGAAGCCCGGGAGCAGTTCTTC	peak5	P30_0_F1	8,06E-07	32	CD4
TGCGCCAGCAGCTTGGGGGCGGGACTATACGAGCAGTACTTC	peak10	P30_0_F1	8,06E-07	33	CD4
TGTGCCACCAGCAGAGAACTAGCGGGAAGCACAGATACGCAGTATTTT	peak10	P30_0_F1	0	34	CD4
TGCGCCAGCAGCTTGGGCTCCCGGGACTATTCCTACGAGCAGTACTTC	peak10	P30_0_F1	0	35	CD4
TGTGCCAGCAGACGCACCGGGACTAGCGGGAGGGGTACGCAGTATTTT	peak10	P30_0_F1	0	36	CD4
TGTGCCAGCAGTCAGTACCAAGAGACCCAGTACTTC	peak10	P30_0_F1	0	37	CD4
TGCAGTGCTGAGGGCCTACCTGGGGTGTTGGCCCCCGAGCAGTACTTC	peak10	P30_0_F1	0	38	CD8
TGTGCCAGCAGTTTACCATCGGGACCCCCTCCTTACGAGCAGTACTTC	peak10	P30_0_F1	0	39	CD8
TGCGCCAGCAGCTTGACGGGGAATGAGCAGTTCTTC	peak10	P30_0_F1	8,06E-07	40	CD4
TGTGCCAGCAGCCAAGGCCTGCTAGCGGGAGGGAGCGAGACCCAGTACTTC	peak15	P30_0_F1	0	41	CD8
TGTGCCATCAGCCATAGCGGGACAATCGGTACAGATACGCAGTATTTT	peak10	P30_0_F1	0	42	CD4
TGTGCCAGCAGCTTGGGTTATGAGCAGTTCTTC	peak10	P30_0_F1	0	43	CD8
TGTGCCAGCAGTCTTACAGGGATCGCCGGGGAGCTGTTTTTT	peak10	P30_0_F1	0	44	CD8
TGCAGTGCTCAAGCGACTAGCGGGAGGGGTTATGGGGAGCTGTTTTTT	peak10	P30_0_F1	0	45	CD4
TGTGCCAGCAGCTACCGGGGCCTTTCCACAGATACGCAGTATTTT	peak10	P30_0_F1	0	46	CD4
TGTGCCAGCAGCTCTCTAAGAAAGGGGGAGACCCAGTACTTC	peak10	P30_0_F1	0	47	CD4
TGTGCCAGCAGCTTAGATGCTGAAAACTTTTCCTACGAGCAGTACTTC	peak10	P30_0_F1	0	48	CD8
TGCAGCGTTGGGGGCGGCGCGAACACCGGGGAGCTGTTTTTT	peak10	P30_0_F1	0	49	CD4
TGTGCCACTAGTAGCGGGACGTGGGTTGGGCATGAGCAGTTCTTC	peak10	P30_0_F1	0	50	CD4
TGTGCCAGCAGCTCGCCGTTGCACTCCTACAATGAGCAGTTCTTC	peak10	P30_0_F1	0	51	CD4
TGTGCCATCTCGGACAGGGTAGACTATGGCTACACCTTC	peak10	P30_0_F1	1,61E-06	52	CD4
TGTGCCAGCAGAGTCACTAGCACAGATACGCAGTATTTT	peak10	P30_0_F1	0	53	CD4
TGTGCCAGCAGCATCGTGACTAGCGGAGTTAACACCGGGGAGCTGTTTTTT	peak10	P30_0_F1	0	54	CD4
TGTGCCAGCAGCCGCGACAGGTCCGGGGCCAACGTCCTGACTTTC	peak10	P30_0_F1	0	55	CD4
TGCGCCAGCAGACTAGCGGGCTACGAGCAGTACTTC	peak10	P30_0_F1	0	56	CD4
TGCGCCAGCAGCTTAGGCAGGGGCCTCTACGAGCAGTACTTC	peak5	P30_0_F1	8,06E-07	57	CD4
TGTGCCAGCAGGAGGGTGGGTGGTACCTACGAGCAGTACTTC	peak10	P30_0_F1	0	58	CD4
TGCAGTGCCATTCTGGAGGGCACAGATACGCAGTATTTT	peak10	P30_0_F1	0	59	CD4
TGTGCCAGCAGTTTAGGGACAGGGCCTACTTACGAGCAGTACTTC	peak10	P30_0_F1	0	60	CD8
TGTGCCTGGAGTCGTGAAGAGCAGTTCTTC	peak10	P30_0_F1	0	61	CD4
TGTGCCAGCAGCCTAGCGGGAGATACGCAGTATTTT	peak5	P30_0_F1	0	62	CD8
TGTGCCAGCAGCTGGACTAGCGGGAGGGACACCGGGGAGCTGTTTTTT	peak10	P30_0_F1	0	63	CD8
TGCAGTGCTAGAGATCTGGCATCGAACACCGGGGAGCTGTTTTTT	peak5	P30_0_F1	1,61E-06	65	CD4
TGCAGTGCTAGCAGCCCTACTAGTCAGGTCAATGAGCAGTTCTTC	peak5	P30_0_F1	1,61E-06	66	CD8
TGCGCCAGCAGTTCCGGGACCTACAATGAGCAGTTCTTC	peak10	P30_0_F1	1,61E-06	67	CD4
TGTGCCAGCAGCCTTACAAAGAACACCGGGGAGCTGTTTTTT	peak10	P30_0_F1	0	68	CD4
TGTGCCAGCAGCTCCTTGGGGGGAACCTCAACAGATACGCAGTATTTT	peak10	P30_0_F1	0	69	CD4
TGTGCCAGCAGCTTGGCCATTGGGACAGTACAAGAGACCCAGTACTTC	peak10	P30_0_F1	0	70	CD4
TGTGCCAGCAGTTTAAAGCCGGGACAGAACACAGATACGCAGTATTTT	peak10	P30_0_F1	2,42E-06	71	CD4
TGTGCCAGCAGCGACTTGAGCGGGAGCTTCCACAATGAGCAGTTCTTC	peak10	P30_0_F1	0	72	CD8
TGTGCCAGCAGTCAAAGGACTAGCGGACACAATGAGCAGTTCTTC	peak10	P30_0_F1	0	73	CD4
TGTGCCACCACCCAGGGGCGTGGTGAGCAGTTCTTC	peak10	P30_0_F1	0	74	CD4
TGTGCCAGCAGCGTTTCCAGCTACGCTGAAGCTTTCTTT	peak10	P30_0_F1	8,06E-07	75	CD4
TGTGCCAGCAGCTTGGCTCGGTATGAGCAGTTCTTC	peak10	P30_0_F1	0	76	CD4
TGTGCCAGCAGTTACTCCGGGGCAGGGGGCAAAGATACGCAGTATTTT	peak5	P30_0_F1	0	77	CD8
TGTGCCACCAGTAGCGGCAGCTCCTACAATGAGCAGTTCTTC	peak10	P30_0_F1	0	78	CD8
TGTGCCAGCAGCCCGGGCCTAGCGGGAGCCTACGAGCAGTACTTC	peak10	P30_0_F1	0	79	CD8
TGTGCCAGCAGTCTAACGGGAGGGCGAGAGACCCAGTACTTC	peak10	P30_0_F1	0	80	CD4
TGCAGTGCTAGGGCGGGGGACCGTTATCAGCCCCAGCATTTT	peak10	P30_0_F1	0	81	CD4
TGCGCCAGCAGCCAAGGTACGGGACGGAGCTACGAGCAGTACTTC	peak10	P30_0_F1	0	82	CD4
TGTGCCAGCAGCCCCGAGGGACTAGTGGGCACCGGGGAGCTGTTTTTT	peak10	P30_0_F1	0	83	CD4
TGTGCCAGCAGCTTAGGGGACCTCCGCGAGCAGTACTTC	peak10	P30_0_F1	8,06E-07	84	CD4
TGTGCCAGCAGCCAAGGCGCGGCCCTAGCGGCCACCGGGGAGCTGTTTTTT	peak15	P30_0_F1	8,06E-07	85	CD4
TGTGCCAGCAGTCGATCAAGCTACGAGCAGTACTTC	peak10	P30_0_F1	0	86	CD8
TGTGCCAGCAGTTTACGGGGAGCGGTAGGCTACACCTTC	peak15	P30_0_F1	0	87	CD8
TGTGCCAGCCAGGACAGGGTCGGTTACGAGCAGTACTTC	peak10	P30_0_F1	0	88	CD4
TGTGCCTGGATTTGGGGCGGGGAGCTGTTTTTT	peak10	P30_0_F1	0	89	CD4
TGCGCCAGCAGCTTCGGTTACGGGGGAGTTAACAATGAGCAGTTCTTC	peak10	P30_0_F1	0	90	CD4
TGTGCCACAGTTCCTATGACAGTCACCGGGGAGCTGTTTTTT	peak10	P30_0_F1	0	91	CD4
TGTGCCAGCAGCTTGGATGTAGCGGGAGGCCTTCAACGGATCAATGAGCAGTTCTTC	peak5	P30_0_F1	3,22E-06	93	CD4
TGCAGTGCTACCGAAACTAGCGGGGGGAAGCAGTTCTTC	peak10	P30_0_F1	0	94	CD4
TGCAGTGCTCTTCTAGCGGGAAATTACAATGAGCAGTTCTTC	peak15	P30_0_F1	0	95	CD8
TGCGCCAGCAGCTTGGGGAGACAGGCTCAACTAACAGATACGCAGTATTTT	peak10	P30_0_F1	0	96	CD4
TGTGCCAGCAGCCCAGGTGGGCGGGAGAGGCAGTTCTTC	peak10	P30_0_F1	0	97	CD4
TGTGCCAGCAGCCCCCTTCAACCAGGGAAACAGGGCTACGAGCAGTACTTC	peak10	P30_0_F1	0	98	CD4
TGTGCCAGCAGCTTTAATTCCGGGGAGCTGTTTTTT	peak15	P30_0_F1	0	99	CD4
TGTGCCAGTAGTATATCCGGGCCCGGGGCCAACGTCCTGACTTTC	peak10	P30_0_F1	0	100	CD4
TGTGCCGCAGCGGGGGGACCGTACAATGAGCAGTTCTTC	peak5	P30_0_F1	8,06E-07	101	CD4
TGCAGTGCAACGGGACAAGAGAACTACGAGCAGTACTTC	peak5	P30_0_F1	0	102	CD4
TGCAGTGCTAGAGGTCCTTCAGCGGGAGGGCAAAACATTCAGTACTTC	peak5	P30_0_F1	0	103	CD4
TGTGCCAGCAGTATCGCCTACAGGGGTGGGAATCAGCCCCAGCATTTT	peak10	P30_0_F1	0	104	CD8
TGTGCCATCAGTGTTCTCCGGGAAGAGCAGTTCTTC	peak10	P30_0_F1	0	105	CD4
TGCAGTGCTAGCGTAGCGGGAGGGGATGTTAGAGAGACCCAGTACTTC	peak10	P30_0_F1	0	106	CD4
TGCGCCAGCAGCATGACTGGACAAGAGACCCAGTACTTC	peak5	P30_0_F1	0	107	CD4
TGCGCCAGCAGGTCCCTAGCGGGAGGGCCAGAAGAGCAGTACTTC	peak10	P30_0_F1	0	108	CD4
TGTGCCAGCAGCACGACAGGGGGGCAAGATCCGTTCTTC	peak15	P30_0_F1	0	109	CD8
TGTGCCAGCAGCCAAGATCTCACTGAAGCTTTCTTT	peak5	P30_0_F1	0	110	CD8
TGTGCCAGCAGCTTAGCGGGTGGGGATTACAATGAGCAGTTCTTC	peak5	P30_0_F1	8,06E-07	111	CD4
TGTGCCAGCAGTGCAGAGGGAAGCAATCAGCCCCAGCATTTT	peak10	P30_0_F1	0	112	CD4
TGTGCCAGCGGAATCAGGGGGCGCGATGGCTACACCTTC	peak10	P30_0_F1	0	113	CD4
TGCAGTGCGGCGGAAACCGGGACTAGCGGGAGAGAGCAGTACTTC	peak10	P30_0_F1	0	114	CD4
TGCAGTGCTAGAGACCCCGGTGGGCTTGGCACAGATACGCAGTATTTT	peak10	P30_0_F1	0	115	CD4
TGCGCCAGCAGCTTGGATCCTAGCGGGAGAGGATACACGCAGTATTTT	peak15	P30_0_F1	0	116	CD4
TGTGCCACCAGCAGAGATCACGGTGCGGCTGGAAACACCATATATTTT	peak15	P30_0_F1	0	117	CD4
TGTGCCAGCAGTTCCCCCCAACAGGGCGAAAAACTGTTTTTT	peak10	P30_0_F1	0	118	CD4
TGTGCCAGTTCTGCAGGGGGCTATGAGACCCAGTACTTC	peak10	P30_0_F1	0	119	CD4
TGCAGTCCCAGGGGGGGTGAAAAGACCCAGTACTTC	peak15	P30_0_F1	0	120	CD4
TGTGCCAGCAGCTTGTCGCCCAGTGAGCAGTACTTC	peak15	P30_0_F1	0	121	CD8
TGTGCCAGCAGTCCCAACCAGTATTACTGGCAAGAGACCCAGTACTTC	peak5	P30_0_F1	0	122	CD8
TGCAGCGTTGCCAAAGAAGCAGGCTATGGCTACACCTTC	peak10	P30_0_F1	0	123	CD4
TGTGCCACCAGTGACCCACTAGCGGGTGGAGAGACCCAGTACTTC	peak5	P30_0_F1	0	124	CD4
TGTGCCAGCAGCCGGGACCTAGCGAATGTTCGGAATGAGCAGTTCTTC	peak5	P30_0_F1	0	125	CD4
TGTGCCAGCAGCGTAGCAGCTAGCGGAACCTACGAGCAGTACTTC	peak15	P30_0_F1	0	126	CD8
TGTGCCAGCAGTTCCCAAACAGTTTGGTCCTACAATGAGCAGTTCTTC	peak10	P30_0_F1	8,06E-07	127	CD4
TGTGCCAGCAGTTTTCTTAACGAGCAGTACTTC	peak15	P30_0_F1	0	128	CD4
TGCAGTGCTAGGACAGGGGCTAACTATGGCTACACCTTC	peak10	P30_0_F1	0	129	CD4
TGTGCCAGCAGCACAGACAGATACGAGCAGTACTTC	peak5	P30_0_F1	0	130	CD4
TGTGCCAGCAGCTTAAGTACAGGATCCTACGAGCAGTACTTC	peak5	P30_0_F1	8,06E-07	131	CD4
TGTGCCAGCAGCTTAGGGTACGAGCAGTACTTC	peak15	P30_0_F1	0	132	CD8
TGTGCCAGCAGCTTGGAGGTTGCGGGAGGAAGGGGGAGCACAGATACGCAGTATTTT	peak5	P30_0_F1	0	133	CD4
TGTGCCAGCAGTCGTGAGGGGACAACCCCGACCGCTACAGATACGCAGTATTTT	peak15	P30_0_F1	0	134	CD4
TGTGCCAGCAGTTCCCCGGATTGGGACGAGCAGTACTTC	peak5	P30_0_F1	0	135	CD4
TGCGCCAGCAGCCAATCGGGACCGAAAATCAGAGACCCAGTACTTC	peak15	P30_0_F1	0	136	CD8
TGTGCCACCAGCAGATACAGGGGCCCCCACGAGCAGTACTTC	peak5	P30_0_F1	0	137	CD8
TGTGCCAGCACCCTAGTGGGGGGGGACACTGAAGCTTTCTTT	peak15	P30_0_F1	8,06E-07	138	CD4
TGTGCCAGCAGCCAAGGACTAGCGGCGGATACGCAGTATTTT	peak5	P30_0_F1	0	139	CD4
TGTGCCAGCAGCGCTAGCCCCCGCGCGGACGAGCAGTACTTC	peak15	P30_0_F1	0	140	CD4
TGTGCCAGCAGCTCGACTAGCGGGAGCTCATTCTTC	peak15	P30_0_F1	2,34E-05	141	CD8
TGTGCCAGCAGCTTAGCTTCGGAAGAGACCCAGTACTTC	peak10	P30_0_F1	0	142	CD4
TGTGCCAGCAGCTTCTCGACAGGAGGGGAGACCCAGTACTTC	peak15	P30_0_F1	0	143	CD4
TGTGCCAGCAGCTTTATAGCGGGAGAAGTGCAAGAGCTGTTTTTT	peak15	P30_0_F1	2,42E-06	144	CD4
TGTGCCGTCGGGTCCGTTGGGGAGACCCAGTACTTC	peak5	P30_0_F1	0	145	CD4
TGCAGTGCTAGACTAGTCTCCAGATACGAGCAGTACTTC	peak5	P30_0_F1	0	146	CD4
TGTGCCAGCAGCCAAGCAACAGGGGGCGGTGAAAAACTGTTTTTT	peak15	P30_0_F1	0	147	CD4
TGCAGTGCTAGTTCCGGGACAGGGGGCATACAGAAGTACTTC	peak10	P30_0_F1	0	148	CD4
TGCGCCAGCAGCCCCTCCACAGGGGACACTGAAGCTTTCTTT	peak15	P30_0_F1	8,06E-07	149	CD4
TGCGCCAGTCAATCAGGGTACAATGAGCAGTTCTTC	peak5	P30_0_F1	0	151	CD8
TGTGCCAGCAGCGTCCAAGCGGGAGGGGGAACAGATACGCAGTATTTT	peak10	P30_0_F1	0	152	CD4
TGTGCCAGCAGCTTAACGGGAGGCGGCAGGTCCATTAACTATGGCTACACCTTC	peak15	P30_0_F1	0	153	CD4
TGCATCCCCCGAGGTCTAGCTTTCTTT	peak15	P30_0_F1	0	154	CD8
TGTGCCAGCAGCTCAGACGGCGCCTATGGCTACACCTTC	peak15	P30_0_F1	2,42E-06	155	CD8
TGTGCCAGCAGCTCCCCCACAGATACGCAGTATTTT	peak15	P30_0_F1	0	156	CD8
TGTGCCAGCAGCTTAGGCGTGAACAATGAGCAGTTCTTC	peak15	P30_0_F1	0	157	CD8
TGTGCCAGCAGTGAATTCAATCCGGGACAGTCTAGCACAGATACGCAGTATTTT	peak15	P30_0_F1	0	158	CD8
TGTGCCATCAGCCCCGAGGTCACAGATACGCAGTATTTT	peak15	P30_0_F1	0	159	CD8
TGCGCCAGCAGCAGGGACAGAGGCGACACCGGGGAGCTGTTTTTT	peak15	P30_0_F1	0	160	CD4
TGTGCCAGCAGCGCAGATGTTCAGCCCCAGCATTTT	peak15	P30_0_F1	1,13E-05	161	CD4
TGTGCCAGCAGCTTAGGGACTAGCGGGTACAATGAGCAGTTCTTC	peak15	P30_0_F1	8,06E-07	162	CD8
TGTGCCTGGAGTGTGGGACTAGCGGGAGCCCTGACGGGACAGTTCTTC	peak5	P30_0_F1	0	164	CD4
TGCAGCGTTGACTCCTGGGGCTATGGCTACACCTTC	peak15	P30_0_F1	0	165	CD8
TGCAGTGCTACGGACGGGCTTGGGGATGGCTACACCTTC	peak15	P30_0_F1	4,84E-06	166	CD4
TGCAGTGCTAGAGATCGGAGCACCTCGAACACCGGGGAGCTGTTTTTT	peak15	P30_0_F1	0	167	CD8
TGCAGTGCTAGAGGGAACACAGATACGCAGTATTTT	peak15	P30_0_F1	0	168	CD4
TGCAGTGCTCAACGGGCCCCCACGCTTAATGAGCAGTTCTTC	peak5	P30_0_F1	0	169	CD4
TGCAGTGCTGCCGGGGGGACTAGCGGGAAGGGTGAGCAGTTCTTC	peak15	P30_0_F1	0	170	CD4
TGCAGTTTGAGAGGGGGAGCGGGCAATTCCTACGAGCAGTACTTC	peak15	P30_0_F1	0	171	CD4
TGCGCCAGCAGCCCGGGAGCTGCCCCCGGGGAGCTGTTTTTT	peak15	P30_0_F1	0	172	CD4
TGCGCCAGCAGCCGCAGCCCCGGGACCTCAGAGACCCAGTACTTC	peak15	P30_0_F1	0	174	CD8
TGCGCCAGCAGCTTGCTTAGCGCCGACCAAGAGACCCAGTACTTC	peak15	P30_0_F1	0	175	CD8
TGTGCCACCCGGGACAGGGGATACAATGAGCAGTTCTTC	peak15	P30_0_F1	0	176	CD4
TGTGCCACCGGGTCCTTAATCGAGCAGTACTTC	peak15	P30_0_F1	0	177	CD4
TGTGCCAGCAATACCGGGACAGGGGGTAATTCACCCCTCCACTTT	peak15	P30_0_F1	0	178	CD8
TGTGCCAGCACCCCAACAGGGGGTCTAGCTCAGCCCCAGCATTTT	peak15	P30_0_F1	0	179	CD4
TGTGCCAGCACCCTCGTACCTCAATCCTACGAGCAGTACTTC	peak15	P30_0_F1	0	180	CD8
TGTGCCAGCAGCCCCGAGGGGTATGGCTACACCTTC	peak15	P30_0_F1	1,61E-06	181	CD4
TGTGCCAGCAGCCCCTCGATCTACCACACAGATACGCAGTATTTT	peak15	P30_0_F1	0	182	CD8
TGTGCCAGCAGCGAGGCGACAGGGGGTCATCAGCCCCAGCATTTT	peak15	P30_0_F1	8,06E-06	183	CD4
TGTGCCAGCAGCGTAGATCAGACCCCCGAAGTAGGCTACACCTTC	peak15	P30_0_F1	0	184	CD4
TGTGCCAGCAGCTTAGTAGGGGAGGCCCCATACAATGAGCAGTTCTTC	peak15	P30_0_F1	0	185	CD8
TGTGCCAGCAGCTTATGGGGACTAGCGGGGCAGAGCACAGATACGCAGTATTTT	peak15	P30_0_F1	0	186	CD8
TGTGCCAGCAGCTTGAACACCGGGGAGCTGTTTTTT	peak15	P30_0_F1	6,45E-06	187	CD4
TGTGCCAGCAGTCCCGTGGTAGCGGGGATAGAGCAGTACTTC	peak15	P30_0_F1	0	189	CD8
TGTGCCAGCAGTCCGCATACACAGGGGTTCGAGCAGTACTTC	peak15	P30_0_F1	0	190	CD8
TGTGCCAGCAGTGACAGGATTGGCCCCTTGCGGACTGAAGCTTTCTTT	peak15	P30_0_F1	0	191	CD4
TGTGCCAGCAGTTACTCCGCCGGGGGCGAGCAAGAGACCCAGTACTTC	peak15	P30_0_F1	0	192	CD4
TGTGCCAGCAGTTTAGGCACCTATGGAACCGGGGAGCTGTTTTTT	peak15	P30_0_F1	0	193	CD4
TGTGCCAGCCAAGTGGAGGGGCTCGGGGAGAATGAGCAGTTCTTC	peak15	P30_0_F1	8,06E-07	195	CD8
TGTGCCAGCTCACCACATGAGGGGTCCGATTCACCCCTCCACTTT	peak15	P30_0_F1	0	196	CD4
TGTGCCAGCTCACCAGCCAGGGGAGAAGGGACCCAGTACTTC	peak15	P30_0_F1	0	197	CD4
TGTGCCAGCTCAGGCCAGGTGGGAGAGACCCAGTACTTC	peak15	P30_0_F1	0	198	CD4
TGTGCCAGCTCATCTCCGGGACGCATCCAAGATACGCAGTATTTT	peak15	P30_0_F1	0	199	CD4
TGTGCCAGCTCGCCCAGGGGCCCCCCGGGCAATGAGCAGTTCTTC	peak15	P30_0_F1	0	200	CD8
TGTGCCAGTAGTACCGGGACTAGCGGGGGAAGCCAAGAGACCCAGTACTTC	peak15	P30_0_F1	0	201	CD8
TGTGCCAGTAGTATAGTCGACTACAATGAGCAGTTCTTC	peak15	P30_0_F1	0	202	CD8
TGTGCCATCAGTGACCGGCAGACCGCAGGAGATACGCAGTATTTT	peak15	P30_0_F1	0	203	CD8
TGTGCCAGCAATAAAGCTTATGAGGGCTACACCTTC	peak5	P30_10_F1	0,000652804	1	CD8
TGCGCCAGCAGCTTGGCGTCGGGAGGTTCCTACGAGCAGTACTTC	peak5	P30_10_F1	0,000600335	2	CD8
TGCGCCAGCAGCTTAGGTGCGGAACTATACGAGCAGTACTTC	peak10	P30_10_F1	0,000389242	3	CD4
TGCAGCGTTGGCCTCGGCAGCCAAACTGAAGCTTTCTTT	peak10	P30_10_F1	0,000275764	4	CD8
TGTGCCAGCAGTTTTCGGCCCCTCATGAACCATCGGCAAGAGACCCAGTACTTC	peak10	P30_10_F1	0,000236718	5	CD4
TGTGCCGTAAAAGATGACGCCAATGAGCAGTTCTTC	peak10	P30_10_F1	0,000195231	6	CD8
TGCGCCAGCAGCTTGGCGGCTAGCGGGAGCTACGAGCAGTACTTC	peak10	P30_10_F1	0,000168387	7	CD8
TGCAGTGCTAGCCTGACTAGCGGGAGGGCCGACGAGCAGTACTTC	peak10	P30_10_F1	0,000164726	8	CD8
TGCGCCAGCAGCGGGGGTCTCCGGGGCACTGAAGCTTTCTTT	peak15	P30_10_F1	0,000148864	9	CD4
TGCGCCAGCAGCTTGGGCAGGGGGCTCTACGAGCAGTACTTC	peak10	P30_10_F1	0,000143983	10	CD4
TGTGCCAGCAGCCCGCGACAGTCCTCGTTCACAGATACGCAGTATTTT	peak10	P30_10_F1	0,000133001	11	CD4
TGCAGTGCTAGAGTATGGGACGGCAACACTGTCGGATCGTGGGAGACCCAGTACTTC	peak5	P30_10_F1	0,000122019	12	CD8
TGCGCCAGCAGTCTCGGACAGGGTCTCTACGAGCAGTACTTC	peak10	P30_10_F1	0,000117139	13	CD4
TGTGCCAGCATGAAAGATAGAGGCTACACCTTC	peak10	P30_10_F1	0,000101276	14	CD8
TGTGCCAGCAGCTCATATCGGACAGGAGCCTACGAGCAGTACTTC	peak10	P30_10_F1	0,000100056	15	CD4
TGCGCCAGCAGCTCCTCCGGGACAATCCGTAATGAGCAGTTCTTC	peak10	P30_10_F1	9,52E-05	16	CD4
TGTGCCAGCAGCCCTCGGACTAGCGGAGCGGATCAAGAGACCCAGTACTTC	peak10	P30_10_F1	9,52E-05	17	CD8
TGCGCCAGCAGCTTGGGACAGGGGTTGTACGAGCAGTACTTC	peak10	P30_10_F1	8,91E-05	18	CD4
TGCGCCAGCAGCTTGGGCAGGGGCTTATACGAGCAGTACTTC	peak10	P30_10_F1	8,66E-05	19	CD4
TGTGCCAGCAGCCTCCGGACTAGCGGGAGAAATGAGCAGTTCTTC	peak10	P30_10_F1	8,66E-05	20	CD8
TGCGCCAGCAGCCTCTTGGAGGCTCCTTACGAGCAGTACTTC	peak10	P30_10_F1	8,18E-05	21	CD8
TGCGCCAGCAGCCACAGGGGGGGGGGCGCTTACAATGAGCAGTTCTTC	peak10	P30_10_F1	7,44E-05	23	CD8
TGTGCCAGCCGCCCAGGGAATGAGCAGTTCTTC	peak10	P30_10_F1	7,20E-05	24	CD4
TGCAGTGCTAGCACGGGACTAGCGGGAGGCCCCTCCGATTACGAGCAGTACTTC	peak15	P30_10_F1	7,08E-05	25	CD4
TGTGCCAGCAGTCCCGGACAGGGAGTCTACGAGCAGTACTTC	peak10	P30_10_F1	6,35E-05	26	CD4
TGCAGTGCTAGACCTACCACCCTGAGGGAGACCCAGTACTTC	peak10	P30_10_F1	6,22E-05	27	CD4
TGCAGTGCCCCCAGGGGAGGGAATATGGGTGAAGCTTTCTTT	peak10	P30_10_F1	5,49E-05	28	CD4
TGTGCCACCAGCAGAGCTCCCGGATACGAGCAGTACTTC	peak15	P30_10_F1	5,25E-05	29	CD8
TGTGCCAGCAGGGCCCTAGCGGGGGGGGACAATGAGCAGTTCTTC	peak10	P30_10_F1	5,12E-05	30	CD8
TGTGCCAGCAGCCTTGATGCAGCCGAGGCCACCGGGGAGCTGTTTTTT	peak10	P30_10_F1	5,00E-05	31	CD4
TGTGCCAGCAGCTTAAACCCTGACGAAGCCCGGGAGCAGTTCTTC	peak5	P30_10_F1	4,88E-05	32	CD4
TGCGCCAGCAGCTTGGGGGCGGGACTATACGAGCAGTACTTC	peak10	P30_10_F1	4,76E-05	33	CD4
TGTGCCACCAGCAGAGAACTAGCGGGAAGCACAGATACGCAGTATTTT	peak10	P30_10_F1	4,64E-05	34	CD4
TGCGCCAGCAGCTTGGGCTCCCGGGACTATTCCTACGAGCAGTACTTC	peak10	P30_10_F1	4,51E-05	35	CD4
TGTGCCAGCAGACGCACCGGGACTAGCGGGAGGGGTACGCAGTATTTT	peak10	P30_10_F1	4,39E-05	36	CD4
TGTGCCAGCAGTCAGTACCAAGAGACCCAGTACTTC	peak10	P30_10_F1	4,27E-05	37	CD4
TGCAGTGCTGAGGGCCTACCTGGGGTGTTGGCCCCCGAGCAGTACTTC	peak10	P30_10_F1	4,15E-05	38	CD8
TGTGCCAGCAGTTTACCATCGGGACCCCCTCCTTACGAGCAGTACTTC	peak10	P30_10_F1	4,15E-05	39	CD8
TGCGCCAGCAGCTTGACGGGGAATGAGCAGTTCTTC	peak10	P30_10_F1	3,90E-05	40	CD4
TGTGCCAGCAGCCAAGGCCTGCTAGCGGGAGGGAGCGAGACCCAGTACTTC	peak15	P30_10_F1	3,90E-05	41	CD8
TGTGCCATCAGCCATAGCGGGACAATCGGTACAGATACGCAGTATTTT	peak10	P30_10_F1	3,78E-05	42	CD4
TGTGCCAGCAGCTTGGGTTATGAGCAGTTCTTC	peak10	P30_10_F1	3,66E-05	43	CD8
TGTGCCAGCAGTCTTACAGGGATCGCCGGGGAGCTGTTTTTT	peak10	P30_10_F1	3,66E-05	44	CD8
TGCAGTGCTCAAGCGACTAGCGGGAGGGGTTATGGGGAGCTGTTTTTT	peak10	P30_10_F1	3,54E-05	45	CD4
TGTGCCAGCAGCTACCGGGGCCTTTCCACAGATACGCAGTATTTT	peak10	P30_10_F1	3,54E-05	46	CD4
TGTGCCAGCAGCTCTCTAAGAAAGGGGGAGACCCAGTACTTC	peak10	P30_10_F1	3,54E-05	47	CD4
TGTGCCAGCAGCTTAGATGCTGAAAACTTTTCCTACGAGCAGTACTTC	peak10	P30_10_F1	3,54E-05	48	CD8
TGCAGCGTTGGGGGCGGCGCGAACACCGGGGAGCTGTTTTTT	peak10	P30_10_F1	3,42E-05	49	CD4
TGTGCCACTAGTAGCGGGACGTGGGTTGGGCATGAGCAGTTCTTC	peak10	P30_10_F1	3,42E-05	50	CD4
TGTGCCAGCAGCTCGCCGTTGCACTCCTACAATGAGCAGTTCTTC	peak10	P30_10_F1	3,42E-05	51	CD4
TGTGCCATCTCGGACAGGGTAGACTATGGCTACACCTTC	peak10	P30_10_F1	3,42E-05	52	CD4
TGTGCCAGCAGAGTCACTAGCACAGATACGCAGTATTTT	peak10	P30_10_F1	3,29E-05	53	CD4
TGTGCCAGCAGCATCGTGACTAGCGGAGTTAACACCGGGGAGCTGTTTTTT	peak10	P30_10_F1	3,29E-05	54	CD4
TGTGCCAGCAGCCGCGACAGGTCCGGGGCCAACGTCCTGACTTTC	peak10	P30_10_F1	3,17E-05	55	CD4
TGCGCCAGCAGACTAGCGGGCTACGAGCAGTACTTC	peak10	P30_10_F1	3,05E-05	56	CD4
TGCGCCAGCAGCTTAGGCAGGGGCCTCTACGAGCAGTACTTC	peak5	P30_10_F1	3,05E-05	57	CD4
TGTGCCAGCAGGAGGGTGGGTGGTACCTACGAGCAGTACTTC	peak10	P30_10_F1	3,05E-05	58	CD4
TGCAGTGCCATTCTGGAGGGCACAGATACGCAGTATTTT	peak10	P30_10_F1	2,93E-05	59	CD4
TGTGCCAGCAGTTTAGGGACAGGGCCTACTTACGAGCAGTACTTC	peak10	P30_10_F1	2,93E-05	60	CD8
TGTGCCTGGAGTCGTGAAGAGCAGTTCTTC	peak10	P30_10_F1	2,93E-05	61	CD4
TGTGCCAGCAGCCTAGCGGGAGATACGCAGTATTTT	peak5	P30_10_F1	2,81E-05	62	CD8
TGTGCCAGCAGCTGGACTAGCGGGAGGGACACCGGGGAGCTGTTTTTT	peak10	P30_10_F1	2,81E-05	63	CD8
TGCAGTGCTAGAGATCTGGCATCGAACACCGGGGAGCTGTTTTTT	peak5	P30_10_F1	2,68E-05	65	CD4
TGCAGTGCTAGCAGCCCTACTAGTCAGGTCAATGAGCAGTTCTTC	peak5	P30_10_F1	2,68E-05	66	CD8
TGCGCCAGCAGTTCCGGGACCTACAATGAGCAGTTCTTC	peak10	P30_10_F1	2,68E-05	67	CD4
TGTGCCAGCAGCCTTACAAAGAACACCGGGGAGCTGTTTTTT	peak10	P30_10_F1	2,68E-05	68	CD4
TGTGCCAGCAGCTCCTTGGGGGGAACCTCAACAGATACGCAGTATTTT	peak10	P30_10_F1	2,68E-05	69	CD4
TGTGCCAGCAGCTTGGCCATTGGGACAGTACAAGAGACCCAGTACTTC	peak10	P30_10_F1	2,68E-05	70	CD4
TGTGCCAGCAGTTTAAAGCCGGGACAGAACACAGATACGCAGTATTTT	peak10	P30_10_F1	2,56E-05	71	CD4
TGTGCCAGCAGCGACTTGAGCGGGAGCTTCCACAATGAGCAGTTCTTC	peak10	P30_10_F1	2,44E-05	72	CD8
TGTGCCAGCAGTCAAAGGACTAGCGGACACAATGAGCAGTTCTTC	peak10	P30_10_F1	2,44E-05	73	CD4
TGTGCCACCACCCAGGGGCGTGGTGAGCAGTTCTTC	peak10	P30_10_F1	2,32E-05	74	CD4
TGTGCCAGCAGCGTTTCCAGCTACGCTGAAGCTTTCTTT	peak10	P30_10_F1	2,32E-05	75	CD4
TGTGCCAGCAGCTTGGCTCGGTATGAGCAGTTCTTC	peak10	P30_10_F1	2,32E-05	76	CD4
TGTGCCAGCAGTTACTCCGGGGCAGGGGGCAAAGATACGCAGTATTTT	peak5	P30_10_F1	2,32E-05	77	CD8
TGTGCCACCAGTAGCGGCAGCTCCTACAATGAGCAGTTCTTC	peak10	P30_10_F1	2,20E-05	78	CD8
TGTGCCAGCAGCCCGGGCCTAGCGGGAGCCTACGAGCAGTACTTC	peak10	P30_10_F1	2,07E-05	79	CD8
TGTGCCAGCAGTCTAACGGGAGGGCGAGAGACCCAGTACTTC	peak10	P30_10_F1	2,07E-05	80	CD4
TGCAGTGCTAGGGCGGGGGACCGTTATCAGCCCCAGCATTTT	peak10	P30_10_F1	1,95E-05	81	CD4
TGCGCCAGCAGCCAAGGTACGGGACGGAGCTACGAGCAGTACTTC	peak10	P30_10_F1	1,95E-05	82	CD4
TGTGCCAGCAGCCCCGAGGGACTAGTGGGCACCGGGGAGCTGTTTTTT	peak10	P30_10_F1	1,95E-05	83	CD4
TGTGCCAGCAGCTTAGGGGACCTCCGCGAGCAGTACTTC	peak10	P30_10_F1	1,95E-05	84	CD4
TGTGCCAGCAGCCAAGGCGCGGCCCTAGCGGCCACCGGGGAGCTGTTTTTT	peak15	P30_10_F1	1,83E-05	85	CD4
TGTGCCAGCAGTCGATCAAGCTACGAGCAGTACTTC	peak10	P30_10_F1	1,83E-05	86	CD8
TGTGCCAGCAGTTTACGGGGAGCGGTAGGCTACACCTTC	peak15	P30_10_F1	1,83E-05	87	CD8
TGTGCCAGCCAGGACAGGGTCGGTTACGAGCAGTACTTC	peak10	P30_10_F1	1,71E-05	88	CD4
TGTGCCTGGATTTGGGGCGGGGAGCTGTTTTTT	peak10	P30_10_F1	1,71E-05	89	CD4
TGCGCCAGCAGCTTCGGTTACGGGGGAGTTAACAATGAGCAGTTCTTC	peak10	P30_10_F1	1,59E-05	90	CD4
TGTGCCACAGTTCCTATGACAGTCACCGGGGAGCTGTTTTTT	peak10	P30_10_F1	1,59E-05	91	CD4
TGTGCCAGCAGCTTGGATGTAGCGGGAGGCCTTCAACGGATCAATGAGCAGTTCTTC	peak5	P30_10_F1	1,59E-05	93	CD4
TGCAGTGCTACCGAAACTAGCGGGGGGAAGCAGTTCTTC	peak10	P30_10_F1	1,46E-05	94	CD4
TGCAGTGCTCTTCTAGCGGGAAATTACAATGAGCAGTTCTTC	peak15	P30_10_F1	1,46E-05	95	CD8
TGCGCCAGCAGCTTGGGGAGACAGGCTCAACTAACAGATACGCAGTATTTT	peak10	P30_10_F1	1,46E-05	96	CD4
TGTGCCAGCAGCCCAGGTGGGCGGGAGAGGCAGTTCTTC	peak10	P30_10_F1	1,46E-05	97	CD4
TGTGCCAGCAGCCCCCTTCAACCAGGGAAACAGGGCTACGAGCAGTACTTC	peak10	P30_10_F1	1,46E-05	98	CD4
TGTGCCAGCAGCTTTAATTCCGGGGAGCTGTTTTTT	peak15	P30_10_F1	1,46E-05	99	CD4
TGTGCCAGTAGTATATCCGGGCCCGGGGCCAACGTCCTGACTTTC	peak10	P30_10_F1	1,46E-05	100	CD4
TGTGCCGCAGCGGGGGGACCGTACAATGAGCAGTTCTTC	peak5	P30_10_F1	1,46E-05	101	CD4
TGCAGTGCAACGGGACAAGAGAACTACGAGCAGTACTTC	peak5	P30_10_F1	1,34E-05	102	CD4
TGCAGTGCTAGAGGTCCTTCAGCGGGAGGGCAAAACATTCAGTACTTC	peak5	P30_10_F1	1,34E-05	103	CD4
TGTGCCAGCAGTATCGCCTACAGGGGTGGGAATCAGCCCCAGCATTTT	peak10	P30_10_F1	1,34E-05	104	CD8
TGTGCCATCAGTGTTCTCCGGGAAGAGCAGTTCTTC	peak10	P30_10_F1	1,34E-05	105	CD4
TGCAGTGCTAGCGTAGCGGGAGGGGATGTTAGAGAGACCCAGTACTTC	peak10	P30_10_F1	1,22E-05	106	CD4
TGCGCCAGCAGCATGACTGGACAAGAGACCCAGTACTTC	peak5	P30_10_F1	1,22E-05	107	CD4
TGCGCCAGCAGGTCCCTAGCGGGAGGGCCAGAAGAGCAGTACTTC	peak10	P30_10_F1	1,22E-05	108	CD4
TGTGCCAGCAGCACGACAGGGGGGCAAGATCCGTTCTTC	peak15	P30_10_F1	1,22E-05	109	CD8
TGTGCCAGCAGCCAAGATCTCACTGAAGCTTTCTTT	peak5	P30_10_F1	1,22E-05	110	CD8
TGTGCCAGCAGCTTAGCGGGTGGGGATTACAATGAGCAGTTCTTC	peak5	P30_10_F1	1,22E-05	111	CD4
TGTGCCAGCAGTGCAGAGGGAAGCAATCAGCCCCAGCATTTT	peak10	P30_10_F1	1,22E-05	112	CD4
TGTGCCAGCGGAATCAGGGGGCGCGATGGCTACACCTTC	peak10	P30_10_F1	1,22E-05	113	CD4
TGCAGTGCGGCGGAAACCGGGACTAGCGGGAGAGAGCAGTACTTC	peak10	P30_10_F1	1,10E-05	114	CD4
TGCAGTGCTAGAGACCCCGGTGGGCTTGGCACAGATACGCAGTATTTT	peak10	P30_10_F1	1,10E-05	115	CD4
TGCGCCAGCAGCTTGGATCCTAGCGGGAGAGGATACACGCAGTATTTT	peak15	P30_10_F1	1,10E-05	116	CD4
TGTGCCACCAGCAGAGATCACGGTGCGGCTGGAAACACCATATATTTT	peak15	P30_10_F1	1,10E-05	117	CD4
TGTGCCAGCAGTTCCCCCCAACAGGGCGAAAAACTGTTTTTT	peak10	P30_10_F1	1,10E-05	118	CD4
TGTGCCAGTTCTGCAGGGGGCTATGAGACCCAGTACTTC	peak10	P30_10_F1	1,10E-05	119	CD4
TGCAGTCCCAGGGGGGGTGAAAAGACCCAGTACTTC	peak15	P30_10_F1	9,76E-06	120	CD4
TGTGCCAGCAGCTTGTCGCCCAGTGAGCAGTACTTC	peak15	P30_10_F1	9,76E-06	121	CD8
TGTGCCAGCAGTCCCAACCAGTATTACTGGCAAGAGACCCAGTACTTC	peak5	P30_10_F1	9,76E-06	122	CD8
TGCAGCGTTGCCAAAGAAGCAGGCTATGGCTACACCTTC	peak10	P30_10_F1	8,54E-06	123	CD4
TGTGCCACCAGTGACCCACTAGCGGGTGGAGAGACCCAGTACTTC	peak5	P30_10_F1	8,54E-06	124	CD4
TGTGCCAGCAGCCGGGACCTAGCGAATGTTCGGAATGAGCAGTTCTTC	peak5	P30_10_F1	8,54E-06	125	CD4
TGTGCCAGCAGCGTAGCAGCTAGCGGAACCTACGAGCAGTACTTC	peak15	P30_10_F1	8,54E-06	126	CD8
TGTGCCAGCAGTTCCCAAACAGTTTGGTCCTACAATGAGCAGTTCTTC	peak10	P30_10_F1	8,54E-06	127	CD4
TGTGCCAGCAGTTTTCTTAACGAGCAGTACTTC	peak15	P30_10_F1	8,54E-06	128	CD4
TGCAGTGCTAGGACAGGGGCTAACTATGGCTACACCTTC	peak10	P30_10_F1	7,32E-06	129	CD4
TGTGCCAGCAGCACAGACAGATACGAGCAGTACTTC	peak5	P30_10_F1	7,32E-06	130	CD4
TGTGCCAGCAGCTTAAGTACAGGATCCTACGAGCAGTACTTC	peak5	P30_10_F1	7,32E-06	131	CD4
TGTGCCAGCAGCTTAGGGTACGAGCAGTACTTC	peak15	P30_10_F1	7,32E-06	132	CD8
TGTGCCAGCAGCTTGGAGGTTGCGGGAGGAAGGGGGAGCACAGATACGCAGTATTTT	peak5	P30_10_F1	7,32E-06	133	CD4
TGTGCCAGCAGTCGTGAGGGGACAACCCCGACCGCTACAGATACGCAGTATTTT	peak15	P30_10_F1	7,32E-06	134	CD4
TGTGCCAGCAGTTCCCCGGATTGGGACGAGCAGTACTTC	peak5	P30_10_F1	7,32E-06	135	CD4
TGCGCCAGCAGCCAATCGGGACCGAAAATCAGAGACCCAGTACTTC	peak15	P30_10_F1	6,10E-06	136	CD8
TGTGCCACCAGCAGATACAGGGGCCCCCACGAGCAGTACTTC	peak5	P30_10_F1	6,10E-06	137	CD8
TGTGCCAGCACCCTAGTGGGGGGGGACACTGAAGCTTTCTTT	peak15	P30_10_F1	6,10E-06	138	CD4
TGTGCCAGCAGCCAAGGACTAGCGGCGGATACGCAGTATTTT	peak5	P30_10_F1	6,10E-06	139	CD4
TGTGCCAGCAGCGCTAGCCCCCGCGCGGACGAGCAGTACTTC	peak15	P30_10_F1	6,10E-06	140	CD4
TGTGCCAGCAGCTCGACTAGCGGGAGCTCATTCTTC	peak15	P30_10_F1	6,10E-06	141	CD8
TGTGCCAGCAGCTTAGCTTCGGAAGAGACCCAGTACTTC	peak10	P30_10_F1	6,10E-06	142	CD4
TGTGCCAGCAGCTTCTCGACAGGAGGGGAGACCCAGTACTTC	peak15	P30_10_F1	6,10E-06	143	CD4
TGTGCCAGCAGCTTTATAGCGGGAGAAGTGCAAGAGCTGTTTTTT	peak15	P30_10_F1	6,10E-06	144	CD4
TGTGCCGTCGGGTCCGTTGGGGAGACCCAGTACTTC	peak5	P30_10_F1	6,10E-06	145	CD4
TGCAGTGCTAGACTAGTCTCCAGATACGAGCAGTACTTC	peak5	P30_10_F1	4,88E-06	146	CD4
TGTGCCAGCAGCCAAGCAACAGGGGGCGGTGAAAAACTGTTTTTT	peak15	P30_10_F1	4,88E-06	147	CD4
TGCAGTGCTAGTTCCGGGACAGGGGGCATACAGAAGTACTTC	peak10	P30_10_F1	3,66E-06	148	CD4
TGCGCCAGCAGCCCCTCCACAGGGGACACTGAAGCTTTCTTT	peak15	P30_10_F1	3,66E-06	149	CD4
TGCGCCAGTCAATCAGGGTACAATGAGCAGTTCTTC	peak5	P30_10_F1	3,66E-06	151	CD8
TGTGCCAGCAGCGTCCAAGCGGGAGGGGGAACAGATACGCAGTATTTT	peak10	P30_10_F1	3,66E-06	152	CD4
TGTGCCAGCAGCTTAACGGGAGGCGGCAGGTCCATTAACTATGGCTACACCTTC	peak15	P30_10_F1	3,66E-06	153	CD4
TGCATCCCCCGAGGTCTAGCTTTCTTT	peak15	P30_10_F1	2,44E-06	154	CD8
TGTGCCAGCAGCTCAGACGGCGCCTATGGCTACACCTTC	peak15	P30_10_F1	2,44E-06	155	CD8
TGTGCCAGCAGCTCCCCCACAGATACGCAGTATTTT	peak15	P30_10_F1	2,44E-06	156	CD8
TGTGCCAGCAGCTTAGGCGTGAACAATGAGCAGTTCTTC	peak15	P30_10_F1	2,44E-06	157	CD8
TGTGCCAGCAGTGAATTCAATCCGGGACAGTCTAGCACAGATACGCAGTATTTT	peak15	P30_10_F1	2,44E-06	158	CD8
TGTGCCATCAGCCCCGAGGTCACAGATACGCAGTATTTT	peak15	P30_10_F1	2,44E-06	159	CD8
TGCGCCAGCAGCAGGGACAGAGGCGACACCGGGGAGCTGTTTTTT	peak15	P30_10_F1	1,22E-06	160	CD4
TGTGCCAGCAGCGCAGATGTTCAGCCCCAGCATTTT	peak15	P30_10_F1	1,22E-06	161	CD4
TGTGCCAGCAGCTTAGGGACTAGCGGGTACAATGAGCAGTTCTTC	peak15	P30_10_F1	1,22E-06	162	CD8
TGTGCCTGGAGTGTGGGACTAGCGGGAGCCCTGACGGGACAGTTCTTC	peak5	P30_10_F1	1,22E-06	164	CD4
TGCAGCGTTGACTCCTGGGGCTATGGCTACACCTTC	peak15	P30_10_F1	0	165	CD8
TGCAGTGCTACGGACGGGCTTGGGGATGGCTACACCTTC	peak15	P30_10_F1	0	166	CD4
TGCAGTGCTAGAGATCGGAGCACCTCGAACACCGGGGAGCTGTTTTTT	peak15	P30_10_F1	0	167	CD8
TGCAGTGCTAGAGGGAACACAGATACGCAGTATTTT	peak15	P30_10_F1	0	168	CD4
TGCAGTGCTCAACGGGCCCCCACGCTTAATGAGCAGTTCTTC	peak5	P30_10_F1	0	169	CD4
TGCAGTGCTGCCGGGGGGACTAGCGGGAAGGGTGAGCAGTTCTTC	peak15	P30_10_F1	0	170	CD4
TGCAGTTTGAGAGGGGGAGCGGGCAATTCCTACGAGCAGTACTTC	peak15	P30_10_F1	0	171	CD4
TGCGCCAGCAGCCCGGGAGCTGCCCCCGGGGAGCTGTTTTTT	peak15	P30_10_F1	0	172	CD4
TGCGCCAGCAGCCGCAGCCCCGGGACCTCAGAGACCCAGTACTTC	peak15	P30_10_F1	0	174	CD8
TGCGCCAGCAGCTTGCTTAGCGCCGACCAAGAGACCCAGTACTTC	peak15	P30_10_F1	0	175	CD8
TGTGCCACCCGGGACAGGGGATACAATGAGCAGTTCTTC	peak15	P30_10_F1	0	176	CD4
TGTGCCACCGGGTCCTTAATCGAGCAGTACTTC	peak15	P30_10_F1	0	177	CD4
TGTGCCAGCAATACCGGGACAGGGGGTAATTCACCCCTCCACTTT	peak15	P30_10_F1	0	178	CD8
TGTGCCAGCACCCCAACAGGGGGTCTAGCTCAGCCCCAGCATTTT	peak15	P30_10_F1	0	179	CD4
TGTGCCAGCACCCTCGTACCTCAATCCTACGAGCAGTACTTC	peak15	P30_10_F1	0	180	CD8
TGTGCCAGCAGCCCCGAGGGGTATGGCTACACCTTC	peak15	P30_10_F1	0	181	CD4
TGTGCCAGCAGCCCCTCGATCTACCACACAGATACGCAGTATTTT	peak15	P30_10_F1	0	182	CD8
TGTGCCAGCAGCGAGGCGACAGGGGGTCATCAGCCCCAGCATTTT	peak15	P30_10_F1	0	183	CD4
TGTGCCAGCAGCGTAGATCAGACCCCCGAAGTAGGCTACACCTTC	peak15	P30_10_F1	0	184	CD4
TGTGCCAGCAGCTTAGTAGGGGAGGCCCCATACAATGAGCAGTTCTTC	peak15	P30_10_F1	0	185	CD8
TGTGCCAGCAGCTTATGGGGACTAGCGGGGCAGAGCACAGATACGCAGTATTTT	peak15	P30_10_F1	0	186	CD8
TGTGCCAGCAGCTTGAACACCGGGGAGCTGTTTTTT	peak15	P30_10_F1	0	187	CD4
TGTGCCAGCAGTCCCGTGGTAGCGGGGATAGAGCAGTACTTC	peak15	P30_10_F1	0	189	CD8
TGTGCCAGCAGTCCGCATACACAGGGGTTCGAGCAGTACTTC	peak15	P30_10_F1	0	190	CD8
TGTGCCAGCAGTGACAGGATTGGCCCCTTGCGGACTGAAGCTTTCTTT	peak15	P30_10_F1	0	191	CD4
TGTGCCAGCAGTTACTCCGCCGGGGGCGAGCAAGAGACCCAGTACTTC	peak15	P30_10_F1	0	192	CD4
TGTGCCAGCAGTTTAGGCACCTATGGAACCGGGGAGCTGTTTTTT	peak15	P30_10_F1	0	193	CD4
TGTGCCAGCCAAGTGGAGGGGCTCGGGGAGAATGAGCAGTTCTTC	peak15	P30_10_F1	0	195	CD8
TGTGCCAGCTCACCACATGAGGGGTCCGATTCACCCCTCCACTTT	peak15	P30_10_F1	0	196	CD4
TGTGCCAGCTCACCAGCCAGGGGAGAAGGGACCCAGTACTTC	peak15	P30_10_F1	0	197	CD4
TGTGCCAGCTCAGGCCAGGTGGGAGAGACCCAGTACTTC	peak15	P30_10_F1	0	198	CD4
TGTGCCAGCTCATCTCCGGGACGCATCCAAGATACGCAGTATTTT	peak15	P30_10_F1	0	199	CD4
TGTGCCAGCTCGCCCAGGGGCCCCCCGGGCAATGAGCAGTTCTTC	peak15	P30_10_F1	0	200	CD8
TGTGCCAGTAGTACCGGGACTAGCGGGGGAAGCCAAGAGACCCAGTACTTC	peak15	P30_10_F1	0	201	CD8
TGTGCCAGTAGTATAGTCGACTACAATGAGCAGTTCTTC	peak15	P30_10_F1	0	202	CD8
TGTGCCATCAGTGACCGGCAGACCGCAGGAGATACGCAGTATTTT	peak15	P30_10_F1	0	203	CD8
TGTGCCAGCAATAAAGCTTATGAGGGCTACACCTTC	peak5	P30_15_F1	0,000152717	1	CD8
TGCGCCAGCAGCTTGGCGTCGGGAGGTTCCTACGAGCAGTACTTC	peak5	P30_15_F1	0,000135659	2	CD8
TGCGCCAGCAGCTTAGGTGCGGAACTATACGAGCAGTACTTC	peak10	P30_15_F1	0,000236387	3	CD4
TGCAGCGTTGGCCTCGGCAGCCAAACTGAAGCTTTCTTT	peak10	P30_15_F1	0,00018846	4	CD8
TGTGCCAGCAGTTTTCGGCCCCTCATGAACCATCGGCAAGAGACCCAGTACTTC	peak10	P30_15_F1	0,000148656	5	CD4
TGTGCCGTAAAAGATGACGCCAATGAGCAGTTCTTC	peak10	P30_15_F1	2,92E-05	6	CD8
TGCGCCAGCAGCTTGGCGGCTAGCGGGAGCTACGAGCAGTACTTC	peak10	P30_15_F1	4,79E-05	7	CD8
TGCAGTGCTAGCCTGACTAGCGGGAGGGCCGACGAGCAGTACTTC	peak10	P30_15_F1	4,87E-05	8	CD8
TGCGCCAGCAGCGGGGGTCTCCGGGGCACTGAAGCTTTCTTT	peak15	P30_15_F1	0,000113726	9	CD4
TGCGCCAGCAGCTTGGGCAGGGGGCTCTACGAGCAGTACTTC	peak10	P30_15_F1	0,000109664	10	CD4
TGTGCCAGCAGCCCGCGACAGTCCTCGTTCACAGATACGCAGTATTTT	peak10	P30_15_F1	5,28E-05	11	CD4
TGCAGTGCTAGAGTATGGGACGGCAACACTGTCGGATCGTGGGAGACCCAGTACTTC	peak5	P30_15_F1	3,01E-05	12	CD8
TGCGCCAGCAGTCTCGGACAGGGTCTCTACGAGCAGTACTTC	peak10	P30_15_F1	6,99E-05	13	CD4
TGTGCCAGCATGAAAGATAGAGGCTACACCTTC	peak10	P30_15_F1	5,85E-05	14	CD8
TGTGCCAGCAGCTCATATCGGACAGGAGCCTACGAGCAGTACTTC	peak10	P30_15_F1	4,47E-05	15	CD4
TGCGCCAGCAGCTCCTCCGGGACAATCCGTAATGAGCAGTTCTTC	peak10	P30_15_F1	4,87E-05	16	CD4
TGTGCCAGCAGCCCTCGGACTAGCGGAGCGGATCAAGAGACCCAGTACTTC	peak10	P30_15_F1	2,92E-05	17	CD8
TGCGCCAGCAGCTTGGGACAGGGGTTGTACGAGCAGTACTTC	peak10	P30_15_F1	4,87E-05	18	CD4
TGCGCCAGCAGCTTGGGCAGGGGCTTATACGAGCAGTACTTC	peak10	P30_15_F1	5,61E-05	19	CD4
TGTGCCAGCAGCCTCCGGACTAGCGGGAGAAATGAGCAGTTCTTC	peak10	P30_15_F1	9,26E-05	20	CD8
TGCGCCAGCAGCCTCTTGGAGGCTCCTTACGAGCAGTACTTC	peak10	P30_15_F1	3,01E-05	21	CD8
TGCGCCAGCAGCCACAGGGGGGGGGGCGCTTACAATGAGCAGTTCTTC	peak10	P30_15_F1	1,30E-05	23	CD8
TGTGCCAGCCGCCCAGGGAATGAGCAGTTCTTC	peak10	P30_15_F1	3,33E-05	24	CD4
TGCAGTGCTAGCACGGGACTAGCGGGAGGCCCCTCCGATTACGAGCAGTACTTC	peak15	P30_15_F1	0,000154342	25	CD4
TGTGCCAGCAGTCCCGGACAGGGAGTCTACGAGCAGTACTTC	peak10	P30_15_F1	4,79E-05	26	CD4
TGCAGTGCTAGACCTACCACCCTGAGGGAGACCCAGTACTTC	peak10	P30_15_F1	8,12E-07	27	CD4
TGCAGTGCCCCCAGGGGAGGGAATATGGGTGAAGCTTTCTTT	peak10	P30_15_F1	6,50E-06	28	CD4
TGTGCCACCAGCAGAGCTCCCGGATACGAGCAGTACTTC	peak15	P30_15_F1	0,000194146	29	CD8
TGTGCCAGCAGGGCCCTAGCGGGGGGGGACAATGAGCAGTTCTTC	peak10	P30_15_F1	1,79E-05	30	CD8
TGTGCCAGCAGCCTTGATGCAGCCGAGGCCACCGGGGAGCTGTTTTTT	peak10	P30_15_F1	1,54E-05	31	CD4
TGTGCCAGCAGCTTAAACCCTGACGAAGCCCGGGAGCAGTTCTTC	peak5	P30_15_F1	2,76E-05	32	CD4
TGCGCCAGCAGCTTGGGGGCGGGACTATACGAGCAGTACTTC	peak10	P30_15_F1	2,52E-05	33	CD4
TGTGCCACCAGCAGAGAACTAGCGGGAAGCACAGATACGCAGTATTTT	peak10	P30_15_F1	3,74E-05	34	CD4
TGCGCCAGCAGCTTGGGCTCCCGGGACTATTCCTACGAGCAGTACTTC	peak10	P30_15_F1	3,25E-06	35	CD4
TGTGCCAGCAGACGCACCGGGACTAGCGGGAGGGGTACGCAGTATTTT	peak10	P30_15_F1	2,52E-05	36	CD4
TGTGCCAGCAGTCAGTACCAAGAGACCCAGTACTTC	peak10	P30_15_F1	8,12E-07	37	CD4
TGCAGTGCTGAGGGCCTACCTGGGGTGTTGGCCCCCGAGCAGTACTTC	peak10	P30_15_F1	8,12E-07	38	CD8
TGTGCCAGCAGTTTACCATCGGGACCCCCTCCTTACGAGCAGTACTTC	peak10	P30_15_F1	0	39	CD8
TGCGCCAGCAGCTTGACGGGGAATGAGCAGTTCTTC	peak10	P30_15_F1	4,87E-06	40	CD4
TGTGCCAGCAGCCAAGGCCTGCTAGCGGGAGGGAGCGAGACCCAGTACTTC	peak15	P30_15_F1	8,12E-05	41	CD8
TGTGCCATCAGCCATAGCGGGACAATCGGTACAGATACGCAGTATTTT	peak10	P30_15_F1	9,75E-06	42	CD4
TGTGCCAGCAGCTTGGGTTATGAGCAGTTCTTC	peak10	P30_15_F1	6,50E-06	43	CD8
TGTGCCAGCAGTCTTACAGGGATCGCCGGGGAGCTGTTTTTT	peak10	P30_15_F1	0	44	CD8
TGCAGTGCTCAAGCGACTAGCGGGAGGGGTTATGGGGAGCTGTTTTTT	peak10	P30_15_F1	3,25E-06	45	CD4
TGTGCCAGCAGCTACCGGGGCCTTTCCACAGATACGCAGTATTTT	peak10	P30_15_F1	4,06E-06	46	CD4
TGTGCCAGCAGCTCTCTAAGAAAGGGGGAGACCCAGTACTTC	peak10	P30_15_F1	6,50E-06	47	CD4
TGTGCCAGCAGCTTAGATGCTGAAAACTTTTCCTACGAGCAGTACTTC	peak10	P30_15_F1	2,44E-06	48	CD8
TGCAGCGTTGGGGGCGGCGCGAACACCGGGGAGCTGTTTTTT	peak10	P30_15_F1	0	49	CD4
TGTGCCACTAGTAGCGGGACGTGGGTTGGGCATGAGCAGTTCTTC	peak10	P30_15_F1	6,50E-06	50	CD4
TGTGCCAGCAGCTCGCCGTTGCACTCCTACAATGAGCAGTTCTTC	peak10	P30_15_F1	4,87E-06	51	CD4
TGTGCCATCTCGGACAGGGTAGACTATGGCTACACCTTC	peak10	P30_15_F1	2,19E-05	52	CD4
TGTGCCAGCAGAGTCACTAGCACAGATACGCAGTATTTT	peak10	P30_15_F1	8,12E-06	53	CD4
TGTGCCAGCAGCATCGTGACTAGCGGAGTTAACACCGGGGAGCTGTTTTTT	peak10	P30_15_F1	9,75E-06	54	CD4
TGTGCCAGCAGCCGCGACAGGTCCGGGGCCAACGTCCTGACTTTC	peak10	P30_15_F1	1,54E-05	55	CD4
TGCGCCAGCAGACTAGCGGGCTACGAGCAGTACTTC	peak10	P30_15_F1	8,12E-07	56	CD4
TGCGCCAGCAGCTTAGGCAGGGGCCTCTACGAGCAGTACTTC	peak5	P30_15_F1	1,95E-05	57	CD4
TGTGCCAGCAGGAGGGTGGGTGGTACCTACGAGCAGTACTTC	peak10	P30_15_F1	1,46E-05	58	CD4
TGCAGTGCCATTCTGGAGGGCACAGATACGCAGTATTTT	peak10	P30_15_F1	1,87E-05	59	CD4
TGTGCCAGCAGTTTAGGGACAGGGCCTACTTACGAGCAGTACTTC	peak10	P30_15_F1	8,12E-07	60	CD8
TGTGCCTGGAGTCGTGAAGAGCAGTTCTTC	peak10	P30_15_F1	1,30E-05	61	CD4
TGTGCCAGCAGCCTAGCGGGAGATACGCAGTATTTT	peak5	P30_15_F1	9,75E-06	62	CD8
TGTGCCAGCAGCTGGACTAGCGGGAGGGACACCGGGGAGCTGTTTTTT	peak10	P30_15_F1	2,44E-06	63	CD8
TGCAGTGCTAGAGATCTGGCATCGAACACCGGGGAGCTGTTTTTT	peak5	P30_15_F1	1,95E-05	65	CD4
TGCAGTGCTAGCAGCCCTACTAGTCAGGTCAATGAGCAGTTCTTC	peak5	P30_15_F1	2,84E-05	66	CD8
TGCGCCAGCAGTTCCGGGACCTACAATGAGCAGTTCTTC	peak10	P30_15_F1	2,36E-05	67	CD4
TGTGCCAGCAGCCTTACAAAGAACACCGGGGAGCTGTTTTTT	peak10	P30_15_F1	7,31E-06	68	CD4
TGTGCCAGCAGCTCCTTGGGGGGAACCTCAACAGATACGCAGTATTTT	peak10	P30_15_F1	2,44E-06	69	CD4
TGTGCCAGCAGCTTGGCCATTGGGACAGTACAAGAGACCCAGTACTTC	peak10	P30_15_F1	1,62E-06	70	CD4
TGTGCCAGCAGTTTAAAGCCGGGACAGAACACAGATACGCAGTATTTT	peak10	P30_15_F1	1,38E-05	71	CD4
TGTGCCAGCAGCGACTTGAGCGGGAGCTTCCACAATGAGCAGTTCTTC	peak10	P30_15_F1	0	72	CD8
TGTGCCAGCAGTCAAAGGACTAGCGGACACAATGAGCAGTTCTTC	peak10	P30_15_F1	6,50E-06	73	CD4
TGTGCCACCACCCAGGGGCGTGGTGAGCAGTTCTTC	peak10	P30_15_F1	4,06E-06	74	CD4
TGTGCCAGCAGCGTTTCCAGCTACGCTGAAGCTTTCTTT	peak10	P30_15_F1	1,46E-05	75	CD4
TGTGCCAGCAGCTTGGCTCGGTATGAGCAGTTCTTC	peak10	P30_15_F1	9,75E-06	76	CD4
TGTGCCAGCAGTTACTCCGGGGCAGGGGGCAAAGATACGCAGTATTTT	peak5	P30_15_F1	1,95E-05	77	CD8
TGTGCCACCAGTAGCGGCAGCTCCTACAATGAGCAGTTCTTC	peak10	P30_15_F1	2,44E-06	78	CD8
TGTGCCAGCAGCCCGGGCCTAGCGGGAGCCTACGAGCAGTACTTC	peak10	P30_15_F1	3,25E-06	79	CD8
TGTGCCAGCAGTCTAACGGGAGGGCGAGAGACCCAGTACTTC	peak10	P30_15_F1	2,44E-06	80	CD4
TGCAGTGCTAGGGCGGGGGACCGTTATCAGCCCCAGCATTTT	peak10	P30_15_F1	4,06E-06	81	CD4
TGCGCCAGCAGCCAAGGTACGGGACGGAGCTACGAGCAGTACTTC	peak10	P30_15_F1	8,12E-07	82	CD4
TGTGCCAGCAGCCCCGAGGGACTAGTGGGCACCGGGGAGCTGTTTTTT	peak10	P30_15_F1	7,31E-06	83	CD4
TGTGCCAGCAGCTTAGGGGACCTCCGCGAGCAGTACTTC	peak10	P30_15_F1	4,06E-06	84	CD4
TGTGCCAGCAGCCAAGGCGCGGCCCTAGCGGCCACCGGGGAGCTGTTTTTT	peak15	P30_15_F1	2,27E-05	85	CD4
TGTGCCAGCAGTCGATCAAGCTACGAGCAGTACTTC	peak10	P30_15_F1	6,50E-06	86	CD8
TGTGCCAGCAGTTTACGGGGAGCGGTAGGCTACACCTTC	peak15	P30_15_F1	3,82E-05	87	CD8
TGTGCCAGCCAGGACAGGGTCGGTTACGAGCAGTACTTC	peak10	P30_15_F1	4,87E-06	88	CD4
TGTGCCTGGATTTGGGGCGGGGAGCTGTTTTTT	peak10	P30_15_F1	7,31E-06	89	CD4
TGCGCCAGCAGCTTCGGTTACGGGGGAGTTAACAATGAGCAGTTCTTC	peak10	P30_15_F1	9,75E-06	90	CD4
TGTGCCACAGTTCCTATGACAGTCACCGGGGAGCTGTTTTTT	peak10	P30_15_F1	1,06E-05	91	CD4
TGTGCCAGCAGCTTGGATGTAGCGGGAGGCCTTCAACGGATCAATGAGCAGTTCTTC	peak5	P30_15_F1	5,69E-06	93	CD4
TGCAGTGCTACCGAAACTAGCGGGGGGAAGCAGTTCTTC	peak10	P30_15_F1	4,06E-06	94	CD4
TGCAGTGCTCTTCTAGCGGGAAATTACAATGAGCAGTTCTTC	peak15	P30_15_F1	5,44E-05	95	CD8
TGCGCCAGCAGCTTGGGGAGACAGGCTCAACTAACAGATACGCAGTATTTT	peak10	P30_15_F1	2,44E-06	96	CD4
TGTGCCAGCAGCCCAGGTGGGCGGGAGAGGCAGTTCTTC	peak10	P30_15_F1	8,12E-06	97	CD4
TGTGCCAGCAGCCCCCTTCAACCAGGGAAACAGGGCTACGAGCAGTACTTC	peak10	P30_15_F1	4,06E-06	98	CD4
TGTGCCAGCAGCTTTAATTCCGGGGAGCTGTTTTTT	peak15	P30_15_F1	1,22E-05	99	CD4
TGTGCCAGTAGTATATCCGGGCCCGGGGCCAACGTCCTGACTTTC	peak10	P30_15_F1	8,94E-06	100	CD4
TGTGCCGCAGCGGGGGGACCGTACAATGAGCAGTTCTTC	peak5	P30_15_F1	8,94E-06	101	CD4
TGCAGTGCAACGGGACAAGAGAACTACGAGCAGTACTTC	peak5	P30_15_F1	0	102	CD4
TGCAGTGCTAGAGGTCCTTCAGCGGGAGGGCAAAACATTCAGTACTTC	peak5	P30_15_F1	9,75E-06	103	CD4
TGTGCCAGCAGTATCGCCTACAGGGGTGGGAATCAGCCCCAGCATTTT	peak10	P30_15_F1	8,12E-06	104	CD8
TGTGCCATCAGTGTTCTCCGGGAAGAGCAGTTCTTC	peak10	P30_15_F1	1,22E-05	105	CD4
TGCAGTGCTAGCGTAGCGGGAGGGGATGTTAGAGAGACCCAGTACTTC	peak10	P30_15_F1	3,25E-06	106	CD4
TGCGCCAGCAGCATGACTGGACAAGAGACCCAGTACTTC	peak5	P30_15_F1	1,62E-06	107	CD4
TGCGCCAGCAGGTCCCTAGCGGGAGGGCCAGAAGAGCAGTACTTC	peak10	P30_15_F1	7,31E-06	108	CD4
TGTGCCAGCAGCACGACAGGGGGGCAAGATCCGTTCTTC	peak15	P30_15_F1	1,54E-05	109	CD8
TGTGCCAGCAGCCAAGATCTCACTGAAGCTTTCTTT	peak5	P30_15_F1	4,87E-06	110	CD8
TGTGCCAGCAGCTTAGCGGGTGGGGATTACAATGAGCAGTTCTTC	peak5	P30_15_F1	8,12E-06	111	CD4
TGTGCCAGCAGTGCAGAGGGAAGCAATCAGCCCCAGCATTTT	peak10	P30_15_F1	9,75E-06	112	CD4
TGTGCCAGCGGAATCAGGGGGCGCGATGGCTACACCTTC	peak10	P30_15_F1	3,25E-06	113	CD4
TGCAGTGCGGCGGAAACCGGGACTAGCGGGAGAGAGCAGTACTTC	peak10	P30_15_F1	7,31E-06	114	CD4
TGCAGTGCTAGAGACCCCGGTGGGCTTGGCACAGATACGCAGTATTTT	peak10	P30_15_F1	8,12E-07	115	CD4
TGCGCCAGCAGCTTGGATCCTAGCGGGAGAGGATACACGCAGTATTTT	peak15	P30_15_F1	1,87E-05	116	CD4
TGTGCCACCAGCAGAGATCACGGTGCGGCTGGAAACACCATATATTTT	peak15	P30_15_F1	8,12E-06	117	CD4
TGTGCCAGCAGTTCCCCCCAACAGGGCGAAAAACTGTTTTTT	peak10	P30_15_F1	1,06E-05	118	CD4
TGTGCCAGTTCTGCAGGGGGCTATGAGACCCAGTACTTC	peak10	P30_15_F1	8,94E-06	119	CD4
TGCAGTCCCAGGGGGGGTGAAAAGACCCAGTACTTC	peak15	P30_15_F1	1,14E-05	120	CD4
TGTGCCAGCAGCTTGTCGCCCAGTGAGCAGTACTTC	peak15	P30_15_F1	1,14E-05	121	CD8
TGTGCCAGCAGTCCCAACCAGTATTACTGGCAAGAGACCCAGTACTTC	peak5	P30_15_F1	1,71E-05	122	CD8
TGCAGCGTTGCCAAAGAAGCAGGCTATGGCTACACCTTC	peak10	P30_15_F1	8,12E-06	123	CD4
TGTGCCACCAGTGACCCACTAGCGGGTGGAGAGACCCAGTACTTC	peak5	P30_15_F1	7,31E-06	124	CD4
TGTGCCAGCAGCCGGGACCTAGCGAATGTTCGGAATGAGCAGTTCTTC	peak5	P30_15_F1	7,31E-06	125	CD4
TGTGCCAGCAGCGTAGCAGCTAGCGGAACCTACGAGCAGTACTTC	peak15	P30_15_F1	0,000144594	126	CD8
TGTGCCAGCAGTTCCCAAACAGTTTGGTCCTACAATGAGCAGTTCTTC	peak10	P30_15_F1	5,69E-06	127	CD4
TGTGCCAGCAGTTTTCTTAACGAGCAGTACTTC	peak15	P30_15_F1	8,12E-06	128	CD4
TGCAGTGCTAGGACAGGGGCTAACTATGGCTACACCTTC	peak10	P30_15_F1	8,12E-06	129	CD4
TGTGCCAGCAGCACAGACAGATACGAGCAGTACTTC	peak5	P30_15_F1	4,87E-06	130	CD4
TGTGCCAGCAGCTTAAGTACAGGATCCTACGAGCAGTACTTC	peak5	P30_15_F1	6,50E-06	131	CD4
TGTGCCAGCAGCTTAGGGTACGAGCAGTACTTC	peak15	P30_15_F1	1,06E-05	132	CD8
TGTGCCAGCAGCTTGGAGGTTGCGGGAGGAAGGGGGAGCACAGATACGCAGTATTTT	peak5	P30_15_F1	8,94E-06	133	CD4
TGTGCCAGCAGTCGTGAGGGGACAACCCCGACCGCTACAGATACGCAGTATTTT	peak15	P30_15_F1	1,14E-05	134	CD4
TGTGCCAGCAGTTCCCCGGATTGGGACGAGCAGTACTTC	peak5	P30_15_F1	1,62E-06	135	CD4
TGCGCCAGCAGCCAATCGGGACCGAAAATCAGAGACCCAGTACTTC	peak15	P30_15_F1	9,02E-05	136	CD8
TGTGCCACCAGCAGATACAGGGGCCCCCACGAGCAGTACTTC	peak5	P30_15_F1	2,44E-06	137	CD8
TGTGCCAGCACCCTAGTGGGGGGGGACACTGAAGCTTTCTTT	peak15	P30_15_F1	1,87E-05	138	CD4
TGTGCCAGCAGCCAAGGACTAGCGGCGGATACGCAGTATTTT	peak5	P30_15_F1	6,50E-06	139	CD4
TGTGCCAGCAGCGCTAGCCCCCGCGCGGACGAGCAGTACTTC	peak15	P30_15_F1	1,06E-05	140	CD4
TGTGCCAGCAGCTCGACTAGCGGGAGCTCATTCTTC	peak15	P30_15_F1	2,68E-05	141	CD8
TGTGCCAGCAGCTTAGCTTCGGAAGAGACCCAGTACTTC	peak10	P30_15_F1	7,31E-06	142	CD4
TGTGCCAGCAGCTTCTCGACAGGAGGGGAGACCCAGTACTTC	peak15	P30_15_F1	5,12E-05	143	CD4
TGTGCCAGCAGCTTTATAGCGGGAGAAGTGCAAGAGCTGTTTTTT	peak15	P30_15_F1	1,71E-05	144	CD4
TGTGCCGTCGGGTCCGTTGGGGAGACCCAGTACTTC	peak5	P30_15_F1	8,12E-07	145	CD4
TGCAGTGCTAGACTAGTCTCCAGATACGAGCAGTACTTC	peak5	P30_15_F1	6,50E-06	146	CD4
TGTGCCAGCAGCCAAGCAACAGGGGGCGGTGAAAAACTGTTTTTT	peak15	P30_15_F1	1,06E-05	147	CD4
TGCAGTGCTAGTTCCGGGACAGGGGGCATACAGAAGTACTTC	peak10	P30_15_F1	6,50E-06	148	CD4
TGCGCCAGCAGCCCCTCCACAGGGGACACTGAAGCTTTCTTT	peak15	P30_15_F1	1,95E-05	149	CD4
TGCGCCAGTCAATCAGGGTACAATGAGCAGTTCTTC	peak5	P30_15_F1	0	151	CD8
TGTGCCAGCAGCGTCCAAGCGGGAGGGGGAACAGATACGCAGTATTTT	peak10	P30_15_F1	6,50E-06	152	CD4
TGTGCCAGCAGCTTAACGGGAGGCGGCAGGTCCATTAACTATGGCTACACCTTC	peak15	P30_15_F1	1,46E-05	153	CD4
TGCATCCCCCGAGGTCTAGCTTTCTTT	peak15	P30_15_F1	2,76E-05	154	CD8
TGTGCCAGCAGCTCAGACGGCGCCTATGGCTACACCTTC	peak15	P30_15_F1	1,46E-05	155	CD8
TGTGCCAGCAGCTCCCCCACAGATACGCAGTATTTT	peak15	P30_15_F1	1,14E-05	156	CD8
TGTGCCAGCAGCTTAGGCGTGAACAATGAGCAGTTCTTC	peak15	P30_15_F1	2,36E-05	157	CD8
TGTGCCAGCAGTGAATTCAATCCGGGACAGTCTAGCACAGATACGCAGTATTTT	peak15	P30_15_F1	2,92E-05	158	CD8
TGTGCCATCAGCCCCGAGGTCACAGATACGCAGTATTTT	peak15	P30_15_F1	0,000181961	159	CD8
TGCGCCAGCAGCAGGGACAGAGGCGACACCGGGGAGCTGTTTTTT	peak15	P30_15_F1	1,30E-05	160	CD4
TGTGCCAGCAGCGCAGATGTTCAGCCCCAGCATTTT	peak15	P30_15_F1	9,75E-06	161	CD4
TGTGCCAGCAGCTTAGGGACTAGCGGGTACAATGAGCAGTTCTTC	peak15	P30_15_F1	4,47E-05	162	CD8
TGTGCCTGGAGTGTGGGACTAGCGGGAGCCCTGACGGGACAGTTCTTC	peak5	P30_15_F1	7,31E-06	164	CD4
TGCAGCGTTGACTCCTGGGGCTATGGCTACACCTTC	peak15	P30_15_F1	2,03E-05	165	CD8
TGCAGTGCTACGGACGGGCTTGGGGATGGCTACACCTTC	peak15	P30_15_F1	1,22E-05	166	CD4
TGCAGTGCTAGAGATCGGAGCACCTCGAACACCGGGGAGCTGTTTTTT	peak15	P30_15_F1	2,27E-05	167	CD8
TGCAGTGCTAGAGGGAACACAGATACGCAGTATTTT	peak15	P30_15_F1	2,60E-05	168	CD4
TGCAGTGCTCAACGGGCCCCCACGCTTAATGAGCAGTTCTTC	peak5	P30_15_F1	8,12E-06	169	CD4
TGCAGTGCTGCCGGGGGGACTAGCGGGAAGGGTGAGCAGTTCTTC	peak15	P30_15_F1	1,95E-05	170	CD4
TGCAGTTTGAGAGGGGGAGCGGGCAATTCCTACGAGCAGTACTTC	peak15	P30_15_F1	1,87E-05	171	CD4
TGCGCCAGCAGCCCGGGAGCTGCCCCCGGGGAGCTGTTTTTT	peak15	P30_15_F1	1,54E-05	172	CD4
TGCGCCAGCAGCCGCAGCCCCGGGACCTCAGAGACCCAGTACTTC	peak15	P30_15_F1	6,25E-05	174	CD8
TGCGCCAGCAGCTTGCTTAGCGCCGACCAAGAGACCCAGTACTTC	peak15	P30_15_F1	0,000200645	175	CD8
TGTGCCACCCGGGACAGGGGATACAATGAGCAGTTCTTC	peak15	P30_15_F1	5,85E-05	176	CD4
TGTGCCACCGGGTCCTTAATCGAGCAGTACTTC	peak15	P30_15_F1	5,69E-05	177	CD4
TGTGCCAGCAATACCGGGACAGGGGGTAATTCACCCCTCCACTTT	peak15	P30_15_F1	0,0001186	178	CD8
TGTGCCAGCACCCCAACAGGGGGTCTAGCTCAGCCCCAGCATTTT	peak15	P30_15_F1	1,62E-05	179	CD4
TGTGCCAGCACCCTCGTACCTCAATCCTACGAGCAGTACTTC	peak15	P30_15_F1	2,44E-05	180	CD8
TGTGCCAGCAGCCCCGAGGGGTATGGCTACACCTTC	peak15	P30_15_F1	1,87E-05	181	CD4
TGTGCCAGCAGCCCCTCGATCTACCACACAGATACGCAGTATTTT	peak15	P30_15_F1	3,17E-05	182	CD8
TGTGCCAGCAGCGAGGCGACAGGGGGTCATCAGCCCCAGCATTTT	peak15	P30_15_F1	5,69E-06	183	CD4
TGTGCCAGCAGCGTAGATCAGACCCCCGAAGTAGGCTACACCTTC	peak15	P30_15_F1	2,36E-05	184	CD4
TGTGCCAGCAGCTTAGTAGGGGAGGCCCCATACAATGAGCAGTTCTTC	peak15	P30_15_F1	8,53E-05	185	CD8
TGTGCCAGCAGCTTATGGGGACTAGCGGGGCAGAGCACAGATACGCAGTATTTT	peak15	P30_15_F1	2,11E-05	186	CD8
TGTGCCAGCAGCTTGAACACCGGGGAGCTGTTTTTT	peak15	P30_15_F1	9,75E-06	187	CD4
TGTGCCAGCAGTCCCGTGGTAGCGGGGATAGAGCAGTACTTC	peak15	P30_15_F1	1,87E-05	189	CD8
TGTGCCAGCAGTCCGCATACACAGGGGTTCGAGCAGTACTTC	peak15	P30_15_F1	2,44E-05	190	CD8
TGTGCCAGCAGTGACAGGATTGGCCCCTTGCGGACTGAAGCTTTCTTT	peak15	P30_15_F1	4,31E-05	191	CD4
TGTGCCAGCAGTTACTCCGCCGGGGGCGAGCAAGAGACCCAGTACTTC	peak15	P30_15_F1	0,000106415	192	CD4
TGTGCCAGCAGTTTAGGCACCTATGGAACCGGGGAGCTGTTTTTT	peak15	P30_15_F1	8,94E-06	193	CD4
TGTGCCAGCCAAGTGGAGGGGCTCGGGGAGAATGAGCAGTTCTTC	peak15	P30_15_F1	1,87E-05	195	CD8
TGTGCCAGCTCACCACATGAGGGGTCCGATTCACCCCTCCACTTT	peak15	P30_15_F1	2,60E-05	196	CD4
TGTGCCAGCTCACCAGCCAGGGGAGAAGGGACCCAGTACTTC	peak15	P30_15_F1	1,79E-05	197	CD4
TGTGCCAGCTCAGGCCAGGTGGGAGAGACCCAGTACTTC	peak15	P30_15_F1	1,54E-05	198	CD4
TGTGCCAGCTCATCTCCGGGACGCATCCAAGATACGCAGTATTTT	peak15	P30_15_F1	3,01E-05	199	CD4
TGTGCCAGCTCGCCCAGGGGCCCCCCGGGCAATGAGCAGTTCTTC	peak15	P30_15_F1	3,17E-05	200	CD8
TGTGCCAGTAGTACCGGGACTAGCGGGGGAAGCCAAGAGACCCAGTACTTC	peak15	P30_15_F1	2,36E-05	201	CD8
TGTGCCAGTAGTATAGTCGACTACAATGAGCAGTTCTTC	peak15	P30_15_F1	4,71E-05	202	CD8
TGTGCCATCAGTGACCGGCAGACCGCAGGAGATACGCAGTATTTT	peak15	P30_15_F1	8,37E-05	203	CD8
TGTGCCAGCAATAAAGCTTATGAGGGCTACACCTTC	peak5	P30_45_F1	1,55E-05	1	CD8
TGCGCCAGCAGCTTGGCGTCGGGAGGTTCCTACGAGCAGTACTTC	peak5	P30_45_F1	1,14E-05	2	CD8
TGCGCCAGCAGCTTAGGTGCGGAACTATACGAGCAGTACTTC	peak10	P30_45_F1	6,12E-05	3	CD4
TGCAGCGTTGGCCTCGGCAGCCAAACTGAAGCTTTCTTT	peak10	P30_45_F1	6,53E-06	4	CD8
TGTGCCAGCAGTTTTCGGCCCCTCATGAACCATCGGCAAGAGACCCAGTACTTC	peak10	P30_45_F1	4,57E-05	5	CD4
TGTGCCGTAAAAGATGACGCCAATGAGCAGTTCTTC	peak10	P30_45_F1	2,45E-06	6	CD8
TGCGCCAGCAGCTTGGCGGCTAGCGGGAGCTACGAGCAGTACTTC	peak10	P30_45_F1	7,34E-06	7	CD8
TGCAGTGCTAGCCTGACTAGCGGGAGGGCCGACGAGCAGTACTTC	peak10	P30_45_F1	2,45E-06	8	CD8
TGCGCCAGCAGCGGGGGTCTCCGGGGCACTGAAGCTTTCTTT	peak15	P30_45_F1	3,83E-05	9	CD4
TGCGCCAGCAGCTTGGGCAGGGGGCTCTACGAGCAGTACTTC	peak10	P30_45_F1	2,45E-05	10	CD4
TGTGCCAGCAGCCCGCGACAGTCCTCGTTCACAGATACGCAGTATTTT	peak10	P30_45_F1	1,47E-05	11	CD4
TGCAGTGCTAGAGTATGGGACGGCAACACTGTCGGATCGTGGGAGACCCAGTACTTC	peak5	P30_45_F1	0	12	CD8
TGCGCCAGCAGTCTCGGACAGGGTCTCTACGAGCAGTACTTC	peak10	P30_45_F1	3,75E-05	13	CD4
TGTGCCAGCATGAAAGATAGAGGCTACACCTTC	peak10	P30_45_F1	2,45E-06	14	CD8
TGTGCCAGCAGCTCATATCGGACAGGAGCCTACGAGCAGTACTTC	peak10	P30_45_F1	9,79E-06	15	CD4
TGCGCCAGCAGCTCCTCCGGGACAATCCGTAATGAGCAGTTCTTC	peak10	P30_45_F1	2,37E-05	16	CD4
TGTGCCAGCAGCCCTCGGACTAGCGGAGCGGATCAAGAGACCCAGTACTTC	peak10	P30_45_F1	6,53E-06	17	CD8
TGCGCCAGCAGCTTGGGACAGGGGTTGTACGAGCAGTACTTC	peak10	P30_45_F1	1,88E-05	18	CD4
TGCGCCAGCAGCTTGGGCAGGGGCTTATACGAGCAGTACTTC	peak10	P30_45_F1	1,71E-05	19	CD4
TGTGCCAGCAGCCTCCGGACTAGCGGGAGAAATGAGCAGTTCTTC	peak10	P30_45_F1	0	20	CD8
TGCGCCAGCAGCCTCTTGGAGGCTCCTTACGAGCAGTACTTC	peak10	P30_45_F1	8,16E-07	21	CD8
TGCGCCAGCAGCCACAGGGGGGGGGGCGCTTACAATGAGCAGTTCTTC	peak10	P30_45_F1	3,26E-06	23	CD8
TGTGCCAGCCGCCCAGGGAATGAGCAGTTCTTC	peak10	P30_45_F1	1,63E-05	24	CD4
TGCAGTGCTAGCACGGGACTAGCGGGAGGCCCCTCCGATTACGAGCAGTACTTC	peak15	P30_45_F1	8,16E-07	25	CD4
TGTGCCAGCAGTCCCGGACAGGGAGTCTACGAGCAGTACTTC	peak10	P30_45_F1	1,55E-05	26	CD4
TGCAGTGCTAGACCTACCACCCTGAGGGAGACCCAGTACTTC	peak10	P30_45_F1	0	27	CD4
TGCAGTGCCCCCAGGGGAGGGAATATGGGTGAAGCTTTCTTT	peak10	P30_45_F1	0	28	CD4
TGTGCCACCAGCAGAGCTCCCGGATACGAGCAGTACTTC	peak15	P30_45_F1	3,26E-06	29	CD8
TGTGCCAGCAGGGCCCTAGCGGGGGGGGACAATGAGCAGTTCTTC	peak10	P30_45_F1	0	30	CD8
TGTGCCAGCAGCCTTGATGCAGCCGAGGCCACCGGGGAGCTGTTTTTT	peak10	P30_45_F1	3,26E-06	31	CD4
TGTGCCAGCAGCTTAAACCCTGACGAAGCCCGGGAGCAGTTCTTC	peak5	P30_45_F1	5,71E-06	32	CD4
TGCGCCAGCAGCTTGGGGGCGGGACTATACGAGCAGTACTTC	peak10	P30_45_F1	1,14E-05	33	CD4
TGTGCCACCAGCAGAGAACTAGCGGGAAGCACAGATACGCAGTATTTT	peak10	P30_45_F1	9,79E-06	34	CD4
TGCGCCAGCAGCTTGGGCTCCCGGGACTATTCCTACGAGCAGTACTTC	peak10	P30_45_F1	0	35	CD4
TGTGCCAGCAGACGCACCGGGACTAGCGGGAGGGGTACGCAGTATTTT	peak10	P30_45_F1	6,53E-06	36	CD4
TGTGCCAGCAGTCAGTACCAAGAGACCCAGTACTTC	peak10	P30_45_F1	0	37	CD4
TGCAGTGCTGAGGGCCTACCTGGGGTGTTGGCCCCCGAGCAGTACTTC	peak10	P30_45_F1	0	38	CD8
TGTGCCAGCAGTTTACCATCGGGACCCCCTCCTTACGAGCAGTACTTC	peak10	P30_45_F1	0	39	CD8
TGCGCCAGCAGCTTGACGGGGAATGAGCAGTTCTTC	peak10	P30_45_F1	0	40	CD4
TGTGCCAGCAGCCAAGGCCTGCTAGCGGGAGGGAGCGAGACCCAGTACTTC	peak15	P30_45_F1	3,26E-06	41	CD8
TGTGCCATCAGCCATAGCGGGACAATCGGTACAGATACGCAGTATTTT	peak10	P30_45_F1	2,45E-06	42	CD4
TGTGCCAGCAGCTTGGGTTATGAGCAGTTCTTC	peak10	P30_45_F1	0	43	CD8
TGTGCCAGCAGTCTTACAGGGATCGCCGGGGAGCTGTTTTTT	peak10	P30_45_F1	0	44	CD8
TGCAGTGCTCAAGCGACTAGCGGGAGGGGTTATGGGGAGCTGTTTTTT	peak10	P30_45_F1	0	45	CD4
TGTGCCAGCAGCTACCGGGGCCTTTCCACAGATACGCAGTATTTT	peak10	P30_45_F1	8,16E-07	46	CD4
TGTGCCAGCAGCTCTCTAAGAAAGGGGGAGACCCAGTACTTC	peak10	P30_45_F1	4,89E-06	47	CD4
TGTGCCAGCAGCTTAGATGCTGAAAACTTTTCCTACGAGCAGTACTTC	peak10	P30_45_F1	0	48	CD8
TGCAGCGTTGGGGGCGGCGCGAACACCGGGGAGCTGTTTTTT	peak10	P30_45_F1	0	49	CD4
TGTGCCACTAGTAGCGGGACGTGGGTTGGGCATGAGCAGTTCTTC	peak10	P30_45_F1	6,53E-06	50	CD4
TGTGCCAGCAGCTCGCCGTTGCACTCCTACAATGAGCAGTTCTTC	peak10	P30_45_F1	8,16E-07	51	CD4
TGTGCCATCTCGGACAGGGTAGACTATGGCTACACCTTC	peak10	P30_45_F1	1,47E-05	52	CD4
TGTGCCAGCAGAGTCACTAGCACAGATACGCAGTATTTT	peak10	P30_45_F1	8,16E-07	53	CD4
TGTGCCAGCAGCATCGTGACTAGCGGAGTTAACACCGGGGAGCTGTTTTTT	peak10	P30_45_F1	5,71E-06	54	CD4
TGTGCCAGCAGCCGCGACAGGTCCGGGGCCAACGTCCTGACTTTC	peak10	P30_45_F1	6,53E-06	55	CD4
TGCGCCAGCAGACTAGCGGGCTACGAGCAGTACTTC	peak10	P30_45_F1	0	56	CD4
TGCGCCAGCAGCTTAGGCAGGGGCCTCTACGAGCAGTACTTC	peak5	P30_45_F1	2,45E-06	57	CD4
TGTGCCAGCAGGAGGGTGGGTGGTACCTACGAGCAGTACTTC	peak10	P30_45_F1	2,45E-06	58	CD4
TGCAGTGCCATTCTGGAGGGCACAGATACGCAGTATTTT	peak10	P30_45_F1	1,63E-06	59	CD4
TGTGCCAGCAGTTTAGGGACAGGGCCTACTTACGAGCAGTACTTC	peak10	P30_45_F1	0	60	CD8
TGTGCCTGGAGTCGTGAAGAGCAGTTCTTC	peak10	P30_45_F1	1,63E-06	61	CD4
TGTGCCAGCAGCCTAGCGGGAGATACGCAGTATTTT	peak5	P30_45_F1	3,26E-06	62	CD8
TGTGCCAGCAGCTGGACTAGCGGGAGGGACACCGGGGAGCTGTTTTTT	peak10	P30_45_F1	0	63	CD8
TGCAGTGCTAGAGATCTGGCATCGAACACCGGGGAGCTGTTTTTT	peak5	P30_45_F1	6,53E-06	65	CD4
TGCAGTGCTAGCAGCCCTACTAGTCAGGTCAATGAGCAGTTCTTC	peak5	P30_45_F1	6,53E-06	66	CD8
TGCGCCAGCAGTTCCGGGACCTACAATGAGCAGTTCTTC	peak10	P30_45_F1	5,71E-06	67	CD4
TGTGCCAGCAGCCTTACAAAGAACACCGGGGAGCTGTTTTTT	peak10	P30_45_F1	0	68	CD4
TGTGCCAGCAGCTCCTTGGGGGGAACCTCAACAGATACGCAGTATTTT	peak10	P30_45_F1	0	69	CD4
TGTGCCAGCAGCTTGGCCATTGGGACAGTACAAGAGACCCAGTACTTC	peak10	P30_45_F1	0	70	CD4
TGTGCCAGCAGTTTAAAGCCGGGACAGAACACAGATACGCAGTATTTT	peak10	P30_45_F1	3,26E-06	71	CD4
TGTGCCAGCAGCGACTTGAGCGGGAGCTTCCACAATGAGCAGTTCTTC	peak10	P30_45_F1	0	72	CD8
TGTGCCAGCAGTCAAAGGACTAGCGGACACAATGAGCAGTTCTTC	peak10	P30_45_F1	2,45E-06	73	CD4
TGTGCCACCACCCAGGGGCGTGGTGAGCAGTTCTTC	peak10	P30_45_F1	1,63E-06	74	CD4
TGTGCCAGCAGCGTTTCCAGCTACGCTGAAGCTTTCTTT	peak10	P30_45_F1	2,45E-06	75	CD4
TGTGCCAGCAGCTTGGCTCGGTATGAGCAGTTCTTC	peak10	P30_45_F1	1,63E-06	76	CD4
TGTGCCAGCAGTTACTCCGGGGCAGGGGGCAAAGATACGCAGTATTTT	peak5	P30_45_F1	1,63E-06	77	CD8
TGTGCCACCAGTAGCGGCAGCTCCTACAATGAGCAGTTCTTC	peak10	P30_45_F1	0	78	CD8
TGTGCCAGCAGCCCGGGCCTAGCGGGAGCCTACGAGCAGTACTTC	peak10	P30_45_F1	0	79	CD8
TGTGCCAGCAGTCTAACGGGAGGGCGAGAGACCCAGTACTTC	peak10	P30_45_F1	0	80	CD4
TGCAGTGCTAGGGCGGGGGACCGTTATCAGCCCCAGCATTTT	peak10	P30_45_F1	1,63E-06	81	CD4
TGCGCCAGCAGCCAAGGTACGGGACGGAGCTACGAGCAGTACTTC	peak10	P30_45_F1	0	82	CD4
TGTGCCAGCAGCCCCGAGGGACTAGTGGGCACCGGGGAGCTGTTTTTT	peak10	P30_45_F1	1,63E-06	83	CD4
TGTGCCAGCAGCTTAGGGGACCTCCGCGAGCAGTACTTC	peak10	P30_45_F1	1,63E-06	84	CD4
TGTGCCAGCAGCCAAGGCGCGGCCCTAGCGGCCACCGGGGAGCTGTTTTTT	peak15	P30_45_F1	4,89E-06	85	CD4
TGTGCCAGCAGTCGATCAAGCTACGAGCAGTACTTC	peak10	P30_45_F1	0	86	CD8
TGTGCCAGCAGTTTACGGGGAGCGGTAGGCTACACCTTC	peak15	P30_45_F1	8,16E-07	87	CD8
TGTGCCAGCCAGGACAGGGTCGGTTACGAGCAGTACTTC	peak10	P30_45_F1	2,45E-06	88	CD4
TGTGCCTGGATTTGGGGCGGGGAGCTGTTTTTT	peak10	P30_45_F1	8,16E-07	89	CD4
TGCGCCAGCAGCTTCGGTTACGGGGGAGTTAACAATGAGCAGTTCTTC	peak10	P30_45_F1	3,26E-06	90	CD4
TGTGCCACAGTTCCTATGACAGTCACCGGGGAGCTGTTTTTT	peak10	P30_45_F1	3,26E-06	91	CD4
TGTGCCAGCAGCTTGGATGTAGCGGGAGGCCTTCAACGGATCAATGAGCAGTTCTTC	peak5	P30_45_F1	9,79E-06	93	CD4
TGCAGTGCTACCGAAACTAGCGGGGGGAAGCAGTTCTTC	peak10	P30_45_F1	2,45E-06	94	CD4
TGCAGTGCTCTTCTAGCGGGAAATTACAATGAGCAGTTCTTC	peak15	P30_45_F1	3,26E-06	95	CD8
TGCGCCAGCAGCTTGGGGAGACAGGCTCAACTAACAGATACGCAGTATTTT	peak10	P30_45_F1	0	96	CD4
TGTGCCAGCAGCCCAGGTGGGCGGGAGAGGCAGTTCTTC	peak10	P30_45_F1	1,31E-05	97	CD4
TGTGCCAGCAGCCCCCTTCAACCAGGGAAACAGGGCTACGAGCAGTACTTC	peak10	P30_45_F1	5,71E-06	98	CD4
TGTGCCAGCAGCTTTAATTCCGGGGAGCTGTTTTTT	peak15	P30_45_F1	2,45E-06	99	CD4
TGTGCCAGTAGTATATCCGGGCCCGGGGCCAACGTCCTGACTTTC	peak10	P30_45_F1	3,26E-06	100	CD4
TGTGCCGCAGCGGGGGGACCGTACAATGAGCAGTTCTTC	peak5	P30_45_F1	0	101	CD4
TGCAGTGCAACGGGACAAGAGAACTACGAGCAGTACTTC	peak5	P30_45_F1	2,45E-06	102	CD4
TGCAGTGCTAGAGGTCCTTCAGCGGGAGGGCAAAACATTCAGTACTTC	peak5	P30_45_F1	4,08E-06	103	CD4
TGTGCCAGCAGTATCGCCTACAGGGGTGGGAATCAGCCCCAGCATTTT	peak10	P30_45_F1	1,63E-06	104	CD8
TGTGCCATCAGTGTTCTCCGGGAAGAGCAGTTCTTC	peak10	P30_45_F1	1,63E-06	105	CD4
TGCAGTGCTAGCGTAGCGGGAGGGGATGTTAGAGAGACCCAGTACTTC	peak10	P30_45_F1	6,53E-06	106	CD4
TGCGCCAGCAGCATGACTGGACAAGAGACCCAGTACTTC	peak5	P30_45_F1	0	107	CD4
TGCGCCAGCAGGTCCCTAGCGGGAGGGCCAGAAGAGCAGTACTTC	peak10	P30_45_F1	8,16E-07	108	CD4
TGTGCCAGCAGCACGACAGGGGGGCAAGATCCGTTCTTC	peak15	P30_45_F1	8,16E-07	109	CD8
TGTGCCAGCAGCCAAGATCTCACTGAAGCTTTCTTT	peak5	P30_45_F1	0	110	CD8
TGTGCCAGCAGCTTAGCGGGTGGGGATTACAATGAGCAGTTCTTC	peak5	P30_45_F1	5,71E-06	111	CD4
TGTGCCAGCAGTGCAGAGGGAAGCAATCAGCCCCAGCATTTT	peak10	P30_45_F1	2,45E-06	112	CD4
TGTGCCAGCGGAATCAGGGGGCGCGATGGCTACACCTTC	peak10	P30_45_F1	4,89E-06	113	CD4
TGCAGTGCGGCGGAAACCGGGACTAGCGGGAGAGAGCAGTACTTC	peak10	P30_45_F1	4,08E-06	114	CD4
TGCAGTGCTAGAGACCCCGGTGGGCTTGGCACAGATACGCAGTATTTT	peak10	P30_45_F1	8,16E-07	115	CD4
TGCGCCAGCAGCTTGGATCCTAGCGGGAGAGGATACACGCAGTATTTT	peak15	P30_45_F1	1,63E-06	116	CD4
TGTGCCACCAGCAGAGATCACGGTGCGGCTGGAAACACCATATATTTT	peak15	P30_45_F1	0	117	CD4
TGTGCCAGCAGTTCCCCCCAACAGGGCGAAAAACTGTTTTTT	peak10	P30_45_F1	8,16E-07	118	CD4
TGTGCCAGTTCTGCAGGGGGCTATGAGACCCAGTACTTC	peak10	P30_45_F1	5,71E-06	119	CD4
TGCAGTCCCAGGGGGGGTGAAAAGACCCAGTACTTC	peak15	P30_45_F1	2,45E-06	120	CD4
TGTGCCAGCAGCTTGTCGCCCAGTGAGCAGTACTTC	peak15	P30_45_F1	0	121	CD8
TGTGCCAGCAGTCCCAACCAGTATTACTGGCAAGAGACCCAGTACTTC	peak5	P30_45_F1	0	122	CD8
TGCAGCGTTGCCAAAGAAGCAGGCTATGGCTACACCTTC	peak10	P30_45_F1	6,53E-06	123	CD4
TGTGCCACCAGTGACCCACTAGCGGGTGGAGAGACCCAGTACTTC	peak5	P30_45_F1	4,08E-06	124	CD4
TGTGCCAGCAGCCGGGACCTAGCGAATGTTCGGAATGAGCAGTTCTTC	peak5	P30_45_F1	3,26E-06	125	CD4
TGTGCCAGCAGCGTAGCAGCTAGCGGAACCTACGAGCAGTACTTC	peak15	P30_45_F1	0	126	CD8
TGTGCCAGCAGTTCCCAAACAGTTTGGTCCTACAATGAGCAGTTCTTC	peak10	P30_45_F1	8,16E-07	127	CD4
TGTGCCAGCAGTTTTCTTAACGAGCAGTACTTC	peak15	P30_45_F1	5,71E-06	128	CD4
TGCAGTGCTAGGACAGGGGCTAACTATGGCTACACCTTC	peak10	P30_45_F1	5,71E-06	129	CD4
TGTGCCAGCAGCACAGACAGATACGAGCAGTACTTC	peak5	P30_45_F1	4,89E-06	130	CD4
TGTGCCAGCAGCTTAAGTACAGGATCCTACGAGCAGTACTTC	peak5	P30_45_F1	1,63E-06	131	CD4
TGTGCCAGCAGCTTAGGGTACGAGCAGTACTTC	peak15	P30_45_F1	8,16E-06	132	CD8
TGTGCCAGCAGCTTGGAGGTTGCGGGAGGAAGGGGGAGCACAGATACGCAGTATTTT	peak5	P30_45_F1	0	133	CD4
TGTGCCAGCAGTCGTGAGGGGACAACCCCGACCGCTACAGATACGCAGTATTTT	peak15	P30_45_F1	2,45E-06	134	CD4
TGTGCCAGCAGTTCCCCGGATTGGGACGAGCAGTACTTC	peak5	P30_45_F1	0	135	CD4
TGCGCCAGCAGCCAATCGGGACCGAAAATCAGAGACCCAGTACTTC	peak15	P30_45_F1	5,71E-06	136	CD8
TGTGCCACCAGCAGATACAGGGGCCCCCACGAGCAGTACTTC	peak5	P30_45_F1	0	137	CD8
TGTGCCAGCACCCTAGTGGGGGGGGACACTGAAGCTTTCTTT	peak15	P30_45_F1	0	138	CD4
TGTGCCAGCAGCCAAGGACTAGCGGCGGATACGCAGTATTTT	peak5	P30_45_F1	0	139	CD4
TGTGCCAGCAGCGCTAGCCCCCGCGCGGACGAGCAGTACTTC	peak15	P30_45_F1	2,45E-06	140	CD4
TGTGCCAGCAGCTCGACTAGCGGGAGCTCATTCTTC	peak15	P30_45_F1	8,16E-06	141	CD8
TGTGCCAGCAGCTTAGCTTCGGAAGAGACCCAGTACTTC	peak10	P30_45_F1	2,45E-06	142	CD4
TGTGCCAGCAGCTTCTCGACAGGAGGGGAGACCCAGTACTTC	peak15	P30_45_F1	0	143	CD4
TGTGCCAGCAGCTTTATAGCGGGAGAAGTGCAAGAGCTGTTTTTT	peak15	P30_45_F1	1,14E-05	144	CD4
TGTGCCGTCGGGTCCGTTGGGGAGACCCAGTACTTC	peak5	P30_45_F1	5,71E-06	145	CD4
TGCAGTGCTAGACTAGTCTCCAGATACGAGCAGTACTTC	peak5	P30_45_F1	2,45E-06	146	CD4
TGTGCCAGCAGCCAAGCAACAGGGGGCGGTGAAAAACTGTTTTTT	peak15	P30_45_F1	1,63E-06	147	CD4
TGCAGTGCTAGTTCCGGGACAGGGGGCATACAGAAGTACTTC	peak10	P30_45_F1	8,16E-06	148	CD4
TGCGCCAGCAGCCCCTCCACAGGGGACACTGAAGCTTTCTTT	peak15	P30_45_F1	6,53E-06	149	CD4
TGCGCCAGTCAATCAGGGTACAATGAGCAGTTCTTC	peak5	P30_45_F1	0	151	CD8
TGTGCCAGCAGCGTCCAAGCGGGAGGGGGAACAGATACGCAGTATTTT	peak10	P30_45_F1	8,16E-07	152	CD4
TGTGCCAGCAGCTTAACGGGAGGCGGCAGGTCCATTAACTATGGCTACACCTTC	peak15	P30_45_F1	0	153	CD4
TGCATCCCCCGAGGTCTAGCTTTCTTT	peak15	P30_45_F1	1,63E-06	154	CD8
TGTGCCAGCAGCTCAGACGGCGCCTATGGCTACACCTTC	peak15	P30_45_F1	4,89E-06	155	CD8
TGTGCCAGCAGCTCCCCCACAGATACGCAGTATTTT	peak15	P30_45_F1	3,26E-06	156	CD8
TGTGCCAGCAGCTTAGGCGTGAACAATGAGCAGTTCTTC	peak15	P30_45_F1	1,63E-06	157	CD8
TGTGCCAGCAGTGAATTCAATCCGGGACAGTCTAGCACAGATACGCAGTATTTT	peak15	P30_45_F1	2,37E-05	158	CD8
TGTGCCATCAGCCCCGAGGTCACAGATACGCAGTATTTT	peak15	P30_45_F1	4,08E-06	159	CD8
TGCGCCAGCAGCAGGGACAGAGGCGACACCGGGGAGCTGTTTTTT	peak15	P30_45_F1	0	160	CD4
TGTGCCAGCAGCGCAGATGTTCAGCCCCAGCATTTT	peak15	P30_45_F1	3,26E-06	161	CD4
TGTGCCAGCAGCTTAGGGACTAGCGGGTACAATGAGCAGTTCTTC	peak15	P30_45_F1	2,45E-06	162	CD8
TGTGCCTGGAGTGTGGGACTAGCGGGAGCCCTGACGGGACAGTTCTTC	peak5	P30_45_F1	4,08E-06	164	CD4
TGCAGCGTTGACTCCTGGGGCTATGGCTACACCTTC	peak15	P30_45_F1	0	165	CD8
TGCAGTGCTACGGACGGGCTTGGGGATGGCTACACCTTC	peak15	P30_45_F1	8,97E-06	166	CD4
TGCAGTGCTAGAGATCGGAGCACCTCGAACACCGGGGAGCTGTTTTTT	peak15	P30_45_F1	0	167	CD8
TGCAGTGCTAGAGGGAACACAGATACGCAGTATTTT	peak15	P30_45_F1	8,16E-07	168	CD4
TGCAGTGCTCAACGGGCCCCCACGCTTAATGAGCAGTTCTTC	peak5	P30_45_F1	6,53E-06	169	CD4
TGCAGTGCTGCCGGGGGGACTAGCGGGAAGGGTGAGCAGTTCTTC	peak15	P30_45_F1	0	170	CD4
TGCAGTTTGAGAGGGGGAGCGGGCAATTCCTACGAGCAGTACTTC	peak15	P30_45_F1	8,16E-07	171	CD4
TGCGCCAGCAGCCCGGGAGCTGCCCCCGGGGAGCTGTTTTTT	peak15	P30_45_F1	0	172	CD4
TGCGCCAGCAGCCGCAGCCCCGGGACCTCAGAGACCCAGTACTTC	peak15	P30_45_F1	0	174	CD8
TGCGCCAGCAGCTTGCTTAGCGCCGACCAAGAGACCCAGTACTTC	peak15	P30_45_F1	0	175	CD8
TGTGCCACCCGGGACAGGGGATACAATGAGCAGTTCTTC	peak15	P30_45_F1	4,89E-06	176	CD4
TGTGCCACCGGGTCCTTAATCGAGCAGTACTTC	peak15	P30_45_F1	4,08E-06	177	CD4
TGTGCCAGCAATACCGGGACAGGGGGTAATTCACCCCTCCACTTT	peak15	P30_45_F1	0	178	CD8
TGTGCCAGCACCCCAACAGGGGGTCTAGCTCAGCCCCAGCATTTT	peak15	P30_45_F1	0	179	CD4
TGTGCCAGCACCCTCGTACCTCAATCCTACGAGCAGTACTTC	peak15	P30_45_F1	0	180	CD8
TGTGCCAGCAGCCCCGAGGGGTATGGCTACACCTTC	peak15	P30_45_F1	1,63E-06	181	CD4
TGTGCCAGCAGCCCCTCGATCTACCACACAGATACGCAGTATTTT	peak15	P30_45_F1	0	182	CD8
TGTGCCAGCAGCGAGGCGACAGGGGGTCATCAGCCCCAGCATTTT	peak15	P30_45_F1	6,53E-06	183	CD4
TGTGCCAGCAGCGTAGATCAGACCCCCGAAGTAGGCTACACCTTC	peak15	P30_45_F1	1,63E-06	184	CD4
TGTGCCAGCAGCTTAGTAGGGGAGGCCCCATACAATGAGCAGTTCTTC	peak15	P30_45_F1	2,45E-06	185	CD8
TGTGCCAGCAGCTTATGGGGACTAGCGGGGCAGAGCACAGATACGCAGTATTTT	peak15	P30_45_F1	0	186	CD8
TGTGCCAGCAGCTTGAACACCGGGGAGCTGTTTTTT	peak15	P30_45_F1	5,71E-06	187	CD4
TGTGCCAGCAGTCCCGTGGTAGCGGGGATAGAGCAGTACTTC	peak15	P30_45_F1	0	189	CD8
TGTGCCAGCAGTCCGCATACACAGGGGTTCGAGCAGTACTTC	peak15	P30_45_F1	1,63E-06	190	CD8
TGTGCCAGCAGTGACAGGATTGGCCCCTTGCGGACTGAAGCTTTCTTT	peak15	P30_45_F1	0	191	CD4
TGTGCCAGCAGTTACTCCGCCGGGGGCGAGCAAGAGACCCAGTACTTC	peak15	P30_45_F1	0	192	CD4
TGTGCCAGCAGTTTAGGCACCTATGGAACCGGGGAGCTGTTTTTT	peak15	P30_45_F1	5,71E-06	193	CD4
TGTGCCAGCCAAGTGGAGGGGCTCGGGGAGAATGAGCAGTTCTTC	peak15	P30_45_F1	0	195	CD8
TGTGCCAGCTCACCACATGAGGGGTCCGATTCACCCCTCCACTTT	peak15	P30_45_F1	0	196	CD4
TGTGCCAGCTCACCAGCCAGGGGAGAAGGGACCCAGTACTTC	peak15	P30_45_F1	0	197	CD4
TGTGCCAGCTCAGGCCAGGTGGGAGAGACCCAGTACTTC	peak15	P30_45_F1	8,16E-07	198	CD4
TGTGCCAGCTCATCTCCGGGACGCATCCAAGATACGCAGTATTTT	peak15	P30_45_F1	0	199	CD4
TGTGCCAGCTCGCCCAGGGGCCCCCCGGGCAATGAGCAGTTCTTC	peak15	P30_45_F1	0	200	CD8
TGTGCCAGTAGTACCGGGACTAGCGGGGGAAGCCAAGAGACCCAGTACTTC	peak15	P30_45_F1	0	201	CD8
TGTGCCAGTAGTATAGTCGACTACAATGAGCAGTTCTTC	peak15	P30_45_F1	0	202	CD8
TGTGCCATCAGTGACCGGCAGACCGCAGGAGATACGCAGTATTTT	peak15	P30_45_F1	2,45E-06	203	CD8
TGTGCCAGCAATAAAGCTTATGAGGGCTACACCTTC	peak5	P30_5_F1	0,000755614	1	CD8
TGCGCCAGCAGCTTGGCGTCGGGAGGTTCCTACGAGCAGTACTTC	peak5	P30_5_F1	0,000661735	2	CD8
TGCGCCAGCAGCTTAGGTGCGGAACTATACGAGCAGTACTTC	peak10	P30_5_F1	0,000210656	3	CD4
TGCAGCGTTGGCCTCGGCAGCCAAACTGAAGCTTTCTTT	peak10	P30_5_F1	0,000210656	4	CD8
TGTGCCAGCAGTTTTCGGCCCCTCATGAACCATCGGCAAGAGACCCAGTACTTC	peak10	P30_5_F1	1,14E-05	5	CD4
TGTGCCGTAAAAGATGACGCCAATGAGCAGTTCTTC	peak10	P30_5_F1	4,35E-05	6	CD8
TGCGCCAGCAGCTTGGCGGCTAGCGGGAGCTACGAGCAGTACTTC	peak10	P30_5_F1	0	7	CD8
TGCAGTGCTAGCCTGACTAGCGGGAGGGCCGACGAGCAGTACTTC	peak10	P30_5_F1	0	8	CD8
TGCGCCAGCAGCGGGGGTCTCCGGGGCACTGAAGCTTTCTTT	peak15	P30_5_F1	2,98E-05	9	CD4
TGCGCCAGCAGCTTGGGCAGGGGGCTCTACGAGCAGTACTTC	peak10	P30_5_F1	0,000123646	10	CD4
TGTGCCAGCAGCCCGCGACAGTCCTCGTTCACAGATACGCAGTATTTT	peak10	P30_5_F1	1,83E-05	11	CD4
TGCAGTGCTAGAGTATGGGACGGCAACACTGTCGGATCGTGGGAGACCCAGTACTTC	peak5	P30_5_F1	0,000146543	12	CD8
TGCGCCAGCAGTCTCGGACAGGGTCTCTACGAGCAGTACTTC	peak10	P30_5_F1	8,93E-05	13	CD4
TGTGCCAGCATGAAAGATAGAGGCTACACCTTC	peak10	P30_5_F1	1,83E-05	14	CD8
TGTGCCAGCAGCTCATATCGGACAGGAGCCTACGAGCAGTACTTC	peak10	P30_5_F1	3,43E-05	15	CD4
TGCGCCAGCAGCTCCTCCGGGACAATCCGTAATGAGCAGTTCTTC	peak10	P30_5_F1	4,58E-06	16	CD4
TGTGCCAGCAGCCCTCGGACTAGCGGAGCGGATCAAGAGACCCAGTACTTC	peak10	P30_5_F1	0	17	CD8
TGCGCCAGCAGCTTGGGACAGGGGTTGTACGAGCAGTACTTC	peak10	P30_5_F1	4,35E-05	18	CD4
TGCGCCAGCAGCTTGGGCAGGGGCTTATACGAGCAGTACTTC	peak10	P30_5_F1	2,98E-05	19	CD4
TGTGCCAGCAGCCTCCGGACTAGCGGGAGAAATGAGCAGTTCTTC	peak10	P30_5_F1	2,29E-05	20	CD8
TGCGCCAGCAGCCTCTTGGAGGCTCCTTACGAGCAGTACTTC	peak10	P30_5_F1	2,75E-05	21	CD8
TGCGCCAGCAGCCACAGGGGGGGGGGCGCTTACAATGAGCAGTTCTTC	peak10	P30_5_F1	0	23	CD8
TGTGCCAGCCGCCCAGGGAATGAGCAGTTCTTC	peak10	P30_5_F1	1,14E-05	24	CD4
TGCAGTGCTAGCACGGGACTAGCGGGAGGCCCCTCCGATTACGAGCAGTACTTC	peak15	P30_5_F1	4,58E-06	25	CD4
TGTGCCAGCAGTCCCGGACAGGGAGTCTACGAGCAGTACTTC	peak10	P30_5_F1	4,58E-06	26	CD4
TGCAGTGCTAGACCTACCACCCTGAGGGAGACCCAGTACTTC	peak10	P30_5_F1	4,58E-06	27	CD4
TGCAGTGCCCCCAGGGGAGGGAATATGGGTGAAGCTTTCTTT	peak10	P30_5_F1	0	28	CD4
TGTGCCACCAGCAGAGCTCCCGGATACGAGCAGTACTTC	peak15	P30_5_F1	0	29	CD8
TGTGCCAGCAGGGCCCTAGCGGGGGGGGACAATGAGCAGTTCTTC	peak10	P30_5_F1	0	30	CD8
TGTGCCAGCAGCCTTGATGCAGCCGAGGCCACCGGGGAGCTGTTTTTT	peak10	P30_5_F1	0	31	CD4
TGTGCCAGCAGCTTAAACCCTGACGAAGCCCGGGAGCAGTTCTTC	peak5	P30_5_F1	5,72E-05	32	CD4
TGCGCCAGCAGCTTGGGGGCGGGACTATACGAGCAGTACTTC	peak10	P30_5_F1	1,60E-05	33	CD4
TGTGCCACCAGCAGAGAACTAGCGGGAAGCACAGATACGCAGTATTTT	peak10	P30_5_F1	1,37E-05	34	CD4
TGCGCCAGCAGCTTGGGCTCCCGGGACTATTCCTACGAGCAGTACTTC	peak10	P30_5_F1	0	35	CD4
TGTGCCAGCAGACGCACCGGGACTAGCGGGAGGGGTACGCAGTATTTT	peak10	P30_5_F1	9,16E-06	36	CD4
TGTGCCAGCAGTCAGTACCAAGAGACCCAGTACTTC	peak10	P30_5_F1	0	37	CD4
TGCAGTGCTGAGGGCCTACCTGGGGTGTTGGCCCCCGAGCAGTACTTC	peak10	P30_5_F1	0	38	CD8
TGTGCCAGCAGTTTACCATCGGGACCCCCTCCTTACGAGCAGTACTTC	peak10	P30_5_F1	0	39	CD8
TGCGCCAGCAGCTTGACGGGGAATGAGCAGTTCTTC	peak10	P30_5_F1	0	40	CD4
TGTGCCAGCAGCCAAGGCCTGCTAGCGGGAGGGAGCGAGACCCAGTACTTC	peak15	P30_5_F1	0	41	CD8
TGTGCCATCAGCCATAGCGGGACAATCGGTACAGATACGCAGTATTTT	peak10	P30_5_F1	4,58E-06	42	CD4
TGTGCCAGCAGCTTGGGTTATGAGCAGTTCTTC	peak10	P30_5_F1	0	43	CD8
TGTGCCAGCAGTCTTACAGGGATCGCCGGGGAGCTGTTTTTT	peak10	P30_5_F1	4,58E-06	44	CD8
TGCAGTGCTCAAGCGACTAGCGGGAGGGGTTATGGGGAGCTGTTTTTT	peak10	P30_5_F1	0	45	CD4
TGTGCCAGCAGCTACCGGGGCCTTTCCACAGATACGCAGTATTTT	peak10	P30_5_F1	2,29E-06	46	CD4
TGTGCCAGCAGCTCTCTAAGAAAGGGGGAGACCCAGTACTTC	peak10	P30_5_F1	1,14E-05	47	CD4
TGTGCCAGCAGCTTAGATGCTGAAAACTTTTCCTACGAGCAGTACTTC	peak10	P30_5_F1	1,14E-05	48	CD8
TGCAGCGTTGGGGGCGGCGCGAACACCGGGGAGCTGTTTTTT	peak10	P30_5_F1	0	49	CD4
TGTGCCACTAGTAGCGGGACGTGGGTTGGGCATGAGCAGTTCTTC	peak10	P30_5_F1	2,29E-05	50	CD4
TGTGCCAGCAGCTCGCCGTTGCACTCCTACAATGAGCAGTTCTTC	peak10	P30_5_F1	0	51	CD4
TGTGCCATCTCGGACAGGGTAGACTATGGCTACACCTTC	peak10	P30_5_F1	1,37E-05	52	CD4
TGTGCCAGCAGAGTCACTAGCACAGATACGCAGTATTTT	peak10	P30_5_F1	2,52E-05	53	CD4
TGTGCCAGCAGCATCGTGACTAGCGGAGTTAACACCGGGGAGCTGTTTTTT	peak10	P30_5_F1	2,29E-06	54	CD4
TGTGCCAGCAGCCGCGACAGGTCCGGGGCCAACGTCCTGACTTTC	peak10	P30_5_F1	6,87E-06	55	CD4
TGCGCCAGCAGACTAGCGGGCTACGAGCAGTACTTC	peak10	P30_5_F1	6,87E-06	56	CD4
TGCGCCAGCAGCTTAGGCAGGGGCCTCTACGAGCAGTACTTC	peak5	P30_5_F1	1,37E-05	57	CD4
TGTGCCAGCAGGAGGGTGGGTGGTACCTACGAGCAGTACTTC	peak10	P30_5_F1	1,60E-05	58	CD4
TGCAGTGCCATTCTGGAGGGCACAGATACGCAGTATTTT	peak10	P30_5_F1	6,87E-06	59	CD4
TGTGCCAGCAGTTTAGGGACAGGGCCTACTTACGAGCAGTACTTC	peak10	P30_5_F1	0	60	CD8
TGTGCCTGGAGTCGTGAAGAGCAGTTCTTC	peak10	P30_5_F1	4,58E-06	61	CD4
TGTGCCAGCAGCCTAGCGGGAGATACGCAGTATTTT	peak5	P30_5_F1	3,21E-05	62	CD8
TGTGCCAGCAGCTGGACTAGCGGGAGGGACACCGGGGAGCTGTTTTTT	peak10	P30_5_F1	0	63	CD8
TGCAGTGCTAGAGATCTGGCATCGAACACCGGGGAGCTGTTTTTT	peak5	P30_5_F1	8,47E-05	65	CD4
TGCAGTGCTAGCAGCCCTACTAGTCAGGTCAATGAGCAGTTCTTC	peak5	P30_5_F1	7,33E-05	66	CD8
TGCGCCAGCAGTTCCGGGACCTACAATGAGCAGTTCTTC	peak10	P30_5_F1	2,29E-06	67	CD4
TGTGCCAGCAGCCTTACAAAGAACACCGGGGAGCTGTTTTTT	peak10	P30_5_F1	1,83E-05	68	CD4
TGTGCCAGCAGCTCCTTGGGGGGAACCTCAACAGATACGCAGTATTTT	peak10	P30_5_F1	1,60E-05	69	CD4
TGTGCCAGCAGCTTGGCCATTGGGACAGTACAAGAGACCCAGTACTTC	peak10	P30_5_F1	0	70	CD4
TGTGCCAGCAGTTTAAAGCCGGGACAGAACACAGATACGCAGTATTTT	peak10	P30_5_F1	0	71	CD4
TGTGCCAGCAGCGACTTGAGCGGGAGCTTCCACAATGAGCAGTTCTTC	peak10	P30_5_F1	0	72	CD8
TGTGCCAGCAGTCAAAGGACTAGCGGACACAATGAGCAGTTCTTC	peak10	P30_5_F1	0	73	CD4
TGTGCCACCACCCAGGGGCGTGGTGAGCAGTTCTTC	peak10	P30_5_F1	0	74	CD4
TGTGCCAGCAGCGTTTCCAGCTACGCTGAAGCTTTCTTT	peak10	P30_5_F1	6,87E-06	75	CD4
TGTGCCAGCAGCTTGGCTCGGTATGAGCAGTTCTTC	peak10	P30_5_F1	0	76	CD4
TGTGCCAGCAGTTACTCCGGGGCAGGGGGCAAAGATACGCAGTATTTT	peak5	P30_5_F1	6,41E-05	77	CD8
TGTGCCACCAGTAGCGGCAGCTCCTACAATGAGCAGTTCTTC	peak10	P30_5_F1	0	78	CD8
TGTGCCAGCAGCCCGGGCCTAGCGGGAGCCTACGAGCAGTACTTC	peak10	P30_5_F1	1,14E-05	79	CD8
TGTGCCAGCAGTCTAACGGGAGGGCGAGAGACCCAGTACTTC	peak10	P30_5_F1	2,29E-06	80	CD4
TGCAGTGCTAGGGCGGGGGACCGTTATCAGCCCCAGCATTTT	peak10	P30_5_F1	1,37E-05	81	CD4
TGCGCCAGCAGCCAAGGTACGGGACGGAGCTACGAGCAGTACTTC	peak10	P30_5_F1	0	82	CD4
TGTGCCAGCAGCCCCGAGGGACTAGTGGGCACCGGGGAGCTGTTTTTT	peak10	P30_5_F1	0	83	CD4
TGTGCCAGCAGCTTAGGGGACCTCCGCGAGCAGTACTTC	peak10	P30_5_F1	1,14E-05	84	CD4
TGTGCCAGCAGCCAAGGCGCGGCCCTAGCGGCCACCGGGGAGCTGTTTTTT	peak15	P30_5_F1	1,37E-05	85	CD4
TGTGCCAGCAGTCGATCAAGCTACGAGCAGTACTTC	peak10	P30_5_F1	0	86	CD8
TGTGCCAGCAGTTTACGGGGAGCGGTAGGCTACACCTTC	peak15	P30_5_F1	0	87	CD8
TGTGCCAGCCAGGACAGGGTCGGTTACGAGCAGTACTTC	peak10	P30_5_F1	0	88	CD4
TGTGCCTGGATTTGGGGCGGGGAGCTGTTTTTT	peak10	P30_5_F1	2,29E-06	89	CD4
TGCGCCAGCAGCTTCGGTTACGGGGGAGTTAACAATGAGCAGTTCTTC	peak10	P30_5_F1	2,29E-06	90	CD4
TGTGCCACAGTTCCTATGACAGTCACCGGGGAGCTGTTTTTT	peak10	P30_5_F1	1,37E-05	91	CD4
TGTGCCAGCAGCTTGGATGTAGCGGGAGGCCTTCAACGGATCAATGAGCAGTTCTTC	peak5	P30_5_F1	0,000119066	93	CD4
TGCAGTGCTACCGAAACTAGCGGGGGGAAGCAGTTCTTC	peak10	P30_5_F1	2,29E-06	94	CD4
TGCAGTGCTCTTCTAGCGGGAAATTACAATGAGCAGTTCTTC	peak15	P30_5_F1	0	95	CD8
TGCGCCAGCAGCTTGGGGAGACAGGCTCAACTAACAGATACGCAGTATTTT	peak10	P30_5_F1	9,16E-06	96	CD4
TGTGCCAGCAGCCCAGGTGGGCGGGAGAGGCAGTTCTTC	peak10	P30_5_F1	4,58E-06	97	CD4
TGTGCCAGCAGCCCCCTTCAACCAGGGAAACAGGGCTACGAGCAGTACTTC	peak10	P30_5_F1	9,16E-06	98	CD4
TGTGCCAGCAGCTTTAATTCCGGGGAGCTGTTTTTT	peak15	P30_5_F1	0	99	CD4
TGTGCCAGTAGTATATCCGGGCCCGGGGCCAACGTCCTGACTTTC	peak10	P30_5_F1	4,58E-06	100	CD4
TGTGCCGCAGCGGGGGGACCGTACAATGAGCAGTTCTTC	peak5	P30_5_F1	6,64E-05	101	CD4
TGCAGTGCAACGGGACAAGAGAACTACGAGCAGTACTTC	peak5	P30_5_F1	7,56E-05	102	CD4
TGCAGTGCTAGAGGTCCTTCAGCGGGAGGGCAAAACATTCAGTACTTC	peak5	P30_5_F1	0	103	CD4
TGTGCCAGCAGTATCGCCTACAGGGGTGGGAATCAGCCCCAGCATTTT	peak10	P30_5_F1	1,37E-05	104	CD8
TGTGCCATCAGTGTTCTCCGGGAAGAGCAGTTCTTC	peak10	P30_5_F1	2,29E-06	105	CD4
TGCAGTGCTAGCGTAGCGGGAGGGGATGTTAGAGAGACCCAGTACTTC	peak10	P30_5_F1	0	106	CD4
TGCGCCAGCAGCATGACTGGACAAGAGACCCAGTACTTC	peak5	P30_5_F1	6,87E-06	107	CD4
TGCGCCAGCAGGTCCCTAGCGGGAGGGCCAGAAGAGCAGTACTTC	peak10	P30_5_F1	2,29E-06	108	CD4
TGTGCCAGCAGCACGACAGGGGGGCAAGATCCGTTCTTC	peak15	P30_5_F1	0	109	CD8
TGTGCCAGCAGCCAAGATCTCACTGAAGCTTTCTTT	peak5	P30_5_F1	1,60E-05	110	CD8
TGTGCCAGCAGCTTAGCGGGTGGGGATTACAATGAGCAGTTCTTC	peak5	P30_5_F1	4,58E-05	111	CD4
TGTGCCAGCAGTGCAGAGGGAAGCAATCAGCCCCAGCATTTT	peak10	P30_5_F1	2,29E-06	112	CD4
TGTGCCAGCGGAATCAGGGGGCGCGATGGCTACACCTTC	peak10	P30_5_F1	0	113	CD4
TGCAGTGCGGCGGAAACCGGGACTAGCGGGAGAGAGCAGTACTTC	peak10	P30_5_F1	0	114	CD4
TGCAGTGCTAGAGACCCCGGTGGGCTTGGCACAGATACGCAGTATTTT	peak10	P30_5_F1	1,60E-05	115	CD4
TGCGCCAGCAGCTTGGATCCTAGCGGGAGAGGATACACGCAGTATTTT	peak15	P30_5_F1	2,29E-06	116	CD4
TGTGCCACCAGCAGAGATCACGGTGCGGCTGGAAACACCATATATTTT	peak15	P30_5_F1	0	117	CD4
TGTGCCAGCAGTTCCCCCCAACAGGGCGAAAAACTGTTTTTT	peak10	P30_5_F1	0	118	CD4
TGTGCCAGTTCTGCAGGGGGCTATGAGACCCAGTACTTC	peak10	P30_5_F1	9,16E-06	119	CD4
TGCAGTCCCAGGGGGGGTGAAAAGACCCAGTACTTC	peak15	P30_5_F1	0	120	CD4
TGTGCCAGCAGCTTGTCGCCCAGTGAGCAGTACTTC	peak15	P30_5_F1	0	121	CD8
TGTGCCAGCAGTCCCAACCAGTATTACTGGCAAGAGACCCAGTACTTC	peak5	P30_5_F1	1,37E-05	122	CD8
TGCAGCGTTGCCAAAGAAGCAGGCTATGGCTACACCTTC	peak10	P30_5_F1	1,60E-05	123	CD4
TGTGCCACCAGTGACCCACTAGCGGGTGGAGAGACCCAGTACTTC	peak5	P30_5_F1	1,37E-05	124	CD4
TGTGCCAGCAGCCGGGACCTAGCGAATGTTCGGAATGAGCAGTTCTTC	peak5	P30_5_F1	4,35E-05	125	CD4
TGTGCCAGCAGCGTAGCAGCTAGCGGAACCTACGAGCAGTACTTC	peak15	P30_5_F1	0	126	CD8
TGTGCCAGCAGTTCCCAAACAGTTTGGTCCTACAATGAGCAGTTCTTC	peak10	P30_5_F1	0	127	CD4
TGTGCCAGCAGTTTTCTTAACGAGCAGTACTTC	peak15	P30_5_F1	2,29E-06	128	CD4
TGCAGTGCTAGGACAGGGGCTAACTATGGCTACACCTTC	peak10	P30_5_F1	0	129	CD4
TGTGCCAGCAGCACAGACAGATACGAGCAGTACTTC	peak5	P30_5_F1	4,58E-06	130	CD4
TGTGCCAGCAGCTTAAGTACAGGATCCTACGAGCAGTACTTC	peak5	P30_5_F1	2,52E-05	131	CD4
TGTGCCAGCAGCTTAGGGTACGAGCAGTACTTC	peak15	P30_5_F1	6,87E-06	132	CD8
TGTGCCAGCAGCTTGGAGGTTGCGGGAGGAAGGGGGAGCACAGATACGCAGTATTTT	peak5	P30_5_F1	9,16E-06	133	CD4
TGTGCCAGCAGTCGTGAGGGGACAACCCCGACCGCTACAGATACGCAGTATTTT	peak15	P30_5_F1	2,29E-06	134	CD4
TGTGCCAGCAGTTCCCCGGATTGGGACGAGCAGTACTTC	peak5	P30_5_F1	5,04E-05	135	CD4
TGCGCCAGCAGCCAATCGGGACCGAAAATCAGAGACCCAGTACTTC	peak15	P30_5_F1	0	136	CD8
TGTGCCACCAGCAGATACAGGGGCCCCCACGAGCAGTACTTC	peak5	P30_5_F1	3,89E-05	137	CD8
TGTGCCAGCACCCTAGTGGGGGGGGACACTGAAGCTTTCTTT	peak15	P30_5_F1	6,87E-06	138	CD4
TGTGCCAGCAGCCAAGGACTAGCGGCGGATACGCAGTATTTT	peak5	P30_5_F1	2,06E-05	139	CD4
TGTGCCAGCAGCGCTAGCCCCCGCGCGGACGAGCAGTACTTC	peak15	P30_5_F1	2,29E-06	140	CD4
TGTGCCAGCAGCTCGACTAGCGGGAGCTCATTCTTC	peak15	P30_5_F1	0	141	CD8
TGTGCCAGCAGCTTAGCTTCGGAAGAGACCCAGTACTTC	peak10	P30_5_F1	2,29E-06	142	CD4
TGTGCCAGCAGCTTCTCGACAGGAGGGGAGACCCAGTACTTC	peak15	P30_5_F1	0	143	CD4
TGTGCCAGCAGCTTTATAGCGGGAGAAGTGCAAGAGCTGTTTTTT	peak15	P30_5_F1	0	144	CD4
TGTGCCGTCGGGTCCGTTGGGGAGACCCAGTACTTC	peak5	P30_5_F1	6,87E-06	145	CD4
TGCAGTGCTAGACTAGTCTCCAGATACGAGCAGTACTTC	peak5	P30_5_F1	4,12E-05	146	CD4
TGTGCCAGCAGCCAAGCAACAGGGGGCGGTGAAAAACTGTTTTTT	peak15	P30_5_F1	0	147	CD4
TGCAGTGCTAGTTCCGGGACAGGGGGCATACAGAAGTACTTC	peak10	P30_5_F1	2,29E-06	148	CD4
TGCGCCAGCAGCCCCTCCACAGGGGACACTGAAGCTTTCTTT	peak15	P30_5_F1	0	149	CD4
TGCGCCAGTCAATCAGGGTACAATGAGCAGTTCTTC	peak5	P30_5_F1	8,47E-05	151	CD8
TGTGCCAGCAGCGTCCAAGCGGGAGGGGGAACAGATACGCAGTATTTT	peak10	P30_5_F1	9,16E-06	152	CD4
TGTGCCAGCAGCTTAACGGGAGGCGGCAGGTCCATTAACTATGGCTACACCTTC	peak15	P30_5_F1	2,29E-06	153	CD4
TGCATCCCCCGAGGTCTAGCTTTCTTT	peak15	P30_5_F1	0	154	CD8
TGTGCCAGCAGCTCAGACGGCGCCTATGGCTACACCTTC	peak15	P30_5_F1	0	155	CD8
TGTGCCAGCAGCTCCCCCACAGATACGCAGTATTTT	peak15	P30_5_F1	0	156	CD8
TGTGCCAGCAGCTTAGGCGTGAACAATGAGCAGTTCTTC	peak15	P30_5_F1	0	157	CD8
TGTGCCAGCAGTGAATTCAATCCGGGACAGTCTAGCACAGATACGCAGTATTTT	peak15	P30_5_F1	6,87E-06	158	CD8
TGTGCCATCAGCCCCGAGGTCACAGATACGCAGTATTTT	peak15	P30_5_F1	4,35E-05	159	CD8
TGCGCCAGCAGCAGGGACAGAGGCGACACCGGGGAGCTGTTTTTT	peak15	P30_5_F1	0	160	CD4
TGTGCCAGCAGCGCAGATGTTCAGCCCCAGCATTTT	peak15	P30_5_F1	0	161	CD4
TGTGCCAGCAGCTTAGGGACTAGCGGGTACAATGAGCAGTTCTTC	peak15	P30_5_F1	0	162	CD8
TGTGCCTGGAGTGTGGGACTAGCGGGAGCCCTGACGGGACAGTTCTTC	peak5	P30_5_F1	1,60E-05	164	CD4
TGCAGCGTTGACTCCTGGGGCTATGGCTACACCTTC	peak15	P30_5_F1	0	165	CD8
TGCAGTGCTACGGACGGGCTTGGGGATGGCTACACCTTC	peak15	P30_5_F1	4,58E-06	166	CD4
TGCAGTGCTAGAGATCGGAGCACCTCGAACACCGGGGAGCTGTTTTTT	peak15	P30_5_F1	0	167	CD8
TGCAGTGCTAGAGGGAACACAGATACGCAGTATTTT	peak15	P30_5_F1	0	168	CD4
TGCAGTGCTCAACGGGCCCCCACGCTTAATGAGCAGTTCTTC	peak5	P30_5_F1	1,60E-05	169	CD4
TGCAGTGCTGCCGGGGGGACTAGCGGGAAGGGTGAGCAGTTCTTC	peak15	P30_5_F1	0	170	CD4
TGCAGTTTGAGAGGGGGAGCGGGCAATTCCTACGAGCAGTACTTC	peak15	P30_5_F1	2,29E-06	171	CD4
TGCGCCAGCAGCCCGGGAGCTGCCCCCGGGGAGCTGTTTTTT	peak15	P30_5_F1	0	172	CD4
TGCGCCAGCAGCCGCAGCCCCGGGACCTCAGAGACCCAGTACTTC	peak15	P30_5_F1	0	174	CD8
TGCGCCAGCAGCTTGCTTAGCGCCGACCAAGAGACCCAGTACTTC	peak15	P30_5_F1	0	175	CD8
TGTGCCACCCGGGACAGGGGATACAATGAGCAGTTCTTC	peak15	P30_5_F1	0	176	CD4
TGTGCCACCGGGTCCTTAATCGAGCAGTACTTC	peak15	P30_5_F1	0	177	CD4
TGTGCCAGCAATACCGGGACAGGGGGTAATTCACCCCTCCACTTT	peak15	P30_5_F1	0	178	CD8
TGTGCCAGCACCCCAACAGGGGGTCTAGCTCAGCCCCAGCATTTT	peak15	P30_5_F1	0	179	CD4
TGTGCCAGCACCCTCGTACCTCAATCCTACGAGCAGTACTTC	peak15	P30_5_F1	0	180	CD8
TGTGCCAGCAGCCCCGAGGGGTATGGCTACACCTTC	peak15	P30_5_F1	0	181	CD4
TGTGCCAGCAGCCCCTCGATCTACCACACAGATACGCAGTATTTT	peak15	P30_5_F1	0	182	CD8
TGTGCCAGCAGCGAGGCGACAGGGGGTCATCAGCCCCAGCATTTT	peak15	P30_5_F1	0	183	CD4
TGTGCCAGCAGCGTAGATCAGACCCCCGAAGTAGGCTACACCTTC	peak15	P30_5_F1	0	184	CD4
TGTGCCAGCAGCTTAGTAGGGGAGGCCCCATACAATGAGCAGTTCTTC	peak15	P30_5_F1	0	185	CD8
TGTGCCAGCAGCTTATGGGGACTAGCGGGGCAGAGCACAGATACGCAGTATTTT	peak15	P30_5_F1	0	186	CD8
TGTGCCAGCAGCTTGAACACCGGGGAGCTGTTTTTT	peak15	P30_5_F1	0	187	CD4
TGTGCCAGCAGTCCCGTGGTAGCGGGGATAGAGCAGTACTTC	peak15	P30_5_F1	0	189	CD8
TGTGCCAGCAGTCCGCATACACAGGGGTTCGAGCAGTACTTC	peak15	P30_5_F1	0	190	CD8
TGTGCCAGCAGTGACAGGATTGGCCCCTTGCGGACTGAAGCTTTCTTT	peak15	P30_5_F1	0	191	CD4
TGTGCCAGCAGTTACTCCGCCGGGGGCGAGCAAGAGACCCAGTACTTC	peak15	P30_5_F1	0	192	CD4
TGTGCCAGCAGTTTAGGCACCTATGGAACCGGGGAGCTGTTTTTT	peak15	P30_5_F1	0	193	CD4
TGTGCCAGCCAAGTGGAGGGGCTCGGGGAGAATGAGCAGTTCTTC	peak15	P30_5_F1	0	195	CD8
TGTGCCAGCTCACCACATGAGGGGTCCGATTCACCCCTCCACTTT	peak15	P30_5_F1	0	196	CD4
TGTGCCAGCTCACCAGCCAGGGGAGAAGGGACCCAGTACTTC	peak15	P30_5_F1	0	197	CD4
TGTGCCAGCTCAGGCCAGGTGGGAGAGACCCAGTACTTC	peak15	P30_5_F1	0	198	CD4
TGTGCCAGCTCATCTCCGGGACGCATCCAAGATACGCAGTATTTT	peak15	P30_5_F1	0	199	CD4
TGTGCCAGCTCGCCCAGGGGCCCCCCGGGCAATGAGCAGTTCTTC	peak15	P30_5_F1	0	200	CD8
TGTGCCAGTAGTACCGGGACTAGCGGGGGAAGCCAAGAGACCCAGTACTTC	peak15	P30_5_F1	0	201	CD8
TGTGCCAGTAGTATAGTCGACTACAATGAGCAGTTCTTC	peak15	P30_5_F1	0	202	CD8
TGTGCCATCAGTGACCGGCAGACCGCAGGAGATACGCAGTATTTT	peak15	P30_5_F1	0	203	CD8
