# Supplementary material for: Primary and secondary anti-viral response captured by the dynamics and phenotype of individual T cell clones
Source: eLife journal article supplement (doi:10.7554/elife.53704), 2020-02-21
Supplement: supp [file elife-53704-supp-v1.zip › elife_poa_e53704_Figure_3_source_data_1.xlsx]

## Sheet: top10_M1_CD4
CDR3	frac	day	value
TGCGCCAGCAGCTCACAGACAGGCTCAAAAAACATTCAGTACTTC	CM	15	1
TGCGCCAGCAGCTCGCCGGACAGCACAGATACGCAGTATTTT	CM	15	1
TGTGCCATCACCAGCGGATCTAGCACAGATACGCAGTATTTT	CM	15	0.333113
TGTGCCAGCACCTTCGGGCAGGGGACGAGCTCCTACGAGCAGTACTTC	CM	15	0
TGCGCCAGCAGGGCGGAGCTATCTATGAACACTGAAGCTTTCTTT	CM	15	0
TGTGCCAGCAGTTTAATGACGACAGGGGATGAGCAGTTCTTC	CM	15	0
TGTGCCAGCGACAAGACAGGGGGCGTACTCACAGATACGCAGTATTTT	CM	15	0
TGTGCCAGCAGCGTCTATTCTCGGGCTGAAGCTTTCTTT	CM	15	0.0658731
TGTGCCAGCAGCTTATATAATCAGCCCCAGCATTTT	CM	15	0.374768
TGTGCCAGCAGCCCAGACAGCGCCAGCCATGAAAAACTGTTTTTT	CM	15	0.062442
TGCGCCAGCAGCTCACAGACAGGCTCAAAAAACATTCAGTACTTC	EM	15	0
TGCGCCAGCAGCTCGCCGGACAGCACAGATACGCAGTATTTT	EM	15	0
TGTGCCATCACCAGCGGATCTAGCACAGATACGCAGTATTTT	EM	15	0.666887
TGTGCCAGCACCTTCGGGCAGGGGACGAGCTCCTACGAGCAGTACTTC	EM	15	1
TGCGCCAGCAGGGCGGAGCTATCTATGAACACTGAAGCTTTCTTT	EM	15	1
TGTGCCAGCAGTTTAATGACGACAGGGGATGAGCAGTTCTTC	EM	15	1
TGTGCCAGCGACAAGACAGGGGGCGTACTCACAGATACGCAGTATTTT	EM	15	1
TGTGCCAGCAGCGTCTATTCTCGGGCTGAAGCTTTCTTT	EM	15	0.934127
TGTGCCAGCAGCTTATATAATCAGCCCCAGCATTTT	EM	15	0.625232
TGTGCCAGCAGCCCAGACAGCGCCAGCCATGAAAAACTGTTTTTT	EM	15	0.937558
TGCGCCAGCAGCTCACAGACAGGCTCAAAAAACATTCAGTACTTC	EMRA	15	0
TGCGCCAGCAGCTCGCCGGACAGCACAGATACGCAGTATTTT	EMRA	15	0
TGTGCCATCACCAGCGGATCTAGCACAGATACGCAGTATTTT	EMRA	15	0
TGTGCCAGCACCTTCGGGCAGGGGACGAGCTCCTACGAGCAGTACTTC	EMRA	15	0
TGCGCCAGCAGGGCGGAGCTATCTATGAACACTGAAGCTTTCTTT	EMRA	15	0
TGTGCCAGCAGTTTAATGACGACAGGGGATGAGCAGTTCTTC	EMRA	15	0
TGTGCCAGCGACAAGACAGGGGGCGTACTCACAGATACGCAGTATTTT	EMRA	15	0
TGTGCCAGCAGCGTCTATTCTCGGGCTGAAGCTTTCTTT	EMRA	15	0
TGTGCCAGCAGCTTATATAATCAGCCCCAGCATTTT	EMRA	15	0
TGTGCCAGCAGCCCAGACAGCGCCAGCCATGAAAAACTGTTTTTT	EMRA	15	0
TGCGCCAGCAGCTCACAGACAGGCTCAAAAAACATTCAGTACTTC	CM	45	0.543886
TGCGCCAGCAGCTCGCCGGACAGCACAGATACGCAGTATTTT	CM	45	0
TGTGCCATCACCAGCGGATCTAGCACAGATACGCAGTATTTT	CM	45	0.781531
TGTGCCAGCACCTTCGGGCAGGGGACGAGCTCCTACGAGCAGTACTTC	CM	45	0
TGCGCCAGCAGGGCGGAGCTATCTATGAACACTGAAGCTTTCTTT	CM	45	0.498419
TGTGCCAGCAGTTTAATGACGACAGGGGATGAGCAGTTCTTC	CM	45	0.543886
TGTGCCAGCGACAAGACAGGGGGCGTACTCACAGATACGCAGTATTTT	CM	45	0
TGTGCCAGCAGCGTCTATTCTCGGGCTGAAGCTTTCTTT	CM	45	1
TGTGCCAGCAGCTTATATAATCAGCCCCAGCATTTT	CM	45	0
TGTGCCAGCAGCCCAGACAGCGCCAGCCATGAAAAACTGTTTTTT	CM	45	0
TGCGCCAGCAGCTCACAGACAGGCTCAAAAAACATTCAGTACTTC	EM	45	0.456114
TGCGCCAGCAGCTCGCCGGACAGCACAGATACGCAGTATTTT	EM	45	1
TGTGCCATCACCAGCGGATCTAGCACAGATACGCAGTATTTT	EM	45	0.218469
TGTGCCAGCACCTTCGGGCAGGGGACGAGCTCCTACGAGCAGTACTTC	EM	45	1
TGCGCCAGCAGGGCGGAGCTATCTATGAACACTGAAGCTTTCTTT	EM	45	0.501581
TGTGCCAGCAGTTTAATGACGACAGGGGATGAGCAGTTCTTC	EM	45	0.456114
TGTGCCAGCGACAAGACAGGGGGCGTACTCACAGATACGCAGTATTTT	EM	45	1
TGTGCCAGCAGCGTCTATTCTCGGGCTGAAGCTTTCTTT	EM	45	0
TGTGCCAGCAGCTTATATAATCAGCCCCAGCATTTT	EM	45	1
TGTGCCAGCAGCCCAGACAGCGCCAGCCATGAAAAACTGTTTTTT	EM	45	1
TGCGCCAGCAGCTCACAGACAGGCTCAAAAAACATTCAGTACTTC	EMRA	45	0
TGCGCCAGCAGCTCGCCGGACAGCACAGATACGCAGTATTTT	EMRA	45	0
TGTGCCATCACCAGCGGATCTAGCACAGATACGCAGTATTTT	EMRA	45	0
TGTGCCAGCACCTTCGGGCAGGGGACGAGCTCCTACGAGCAGTACTTC	EMRA	45	0
TGCGCCAGCAGGGCGGAGCTATCTATGAACACTGAAGCTTTCTTT	EMRA	45	0
TGTGCCAGCAGTTTAATGACGACAGGGGATGAGCAGTTCTTC	EMRA	45	0
TGTGCCAGCGACAAGACAGGGGGCGTACTCACAGATACGCAGTATTTT	EMRA	45	0
TGTGCCAGCAGCGTCTATTCTCGGGCTGAAGCTTTCTTT	EMRA	45	0
TGTGCCAGCAGCTTATATAATCAGCCCCAGCATTTT	EMRA	45	0
TGTGCCAGCAGCCCAGACAGCGCCAGCCATGAAAAACTGTTTTTT	EMRA	45	0

## Sheet: top10_M1_CD8
CDR3	frac	day	value
TGTGCCACCAGCGCTGGGCCGGAGATGTACGAGCAGTACTTC	CM	15	0
TGCAGTGCCCCCCGGCGGCAGGATGAGCAGTTCTTC	CM	15	0
TGCGCCAGCAGCTTTTCCGGGACAGGGAACAATGAGCAGTTCTTC	CM	15	0
TGTGCCACCAGCGGGTCCGGCAACTACGAGCAGTACTTC	CM	15	0
TGTGCCAGCAGTGTGGTAGGGACAGGGGCCTACGAGCAGTACGTC	CM	15	0
TGTGCCAGCAGCTTAGCGCAAGGTAGCTACGAGCAGTACTTC	CM	15	0
TGTGCCAGCAGCCGTGACAGCGCCTACGAGCAGTACTTC	CM	15	0
TGCAGTGCCGTCCTTCCGGGACTAGCGGGTTACAATGAGCAGTTCTTC	CM	15	0
TGTGCCAGCAGTCCCCCCGGGACAGGGTCTGGAGATACTGAAGCTTTCTTT	CM	15	0
TGTGCCAGCAGCCAAGAGTCAGTCTCCTACAATGAGCAGTTCTTC	CM	15	0
TGTGCCACCAGCGCTGGGCCGGAGATGTACGAGCAGTACTTC	EM	15	0.686055
TGCAGTGCCCCCCGGCGGCAGGATGAGCAGTTCTTC	EM	15	0.543789
TGCGCCAGCAGCTTTTCCGGGACAGGGAACAATGAGCAGTTCTTC	EM	15	0.974658
TGTGCCACCAGCGGGTCCGGCAACTACGAGCAGTACTTC	EM	15	0.583086
TGTGCCAGCAGTGTGGTAGGGACAGGGGCCTACGAGCAGTACGTC	EM	15	1
TGTGCCAGCAGCTTAGCGCAAGGTAGCTACGAGCAGTACTTC	EM	15	1
TGTGCCAGCAGCCGTGACAGCGCCTACGAGCAGTACTTC	EM	15	0.935768
TGCAGTGCCGTCCTTCCGGGACTAGCGGGTTACAATGAGCAGTTCTTC	EM	15	0.819669
TGTGCCAGCAGTCCCCCCGGGACAGGGTCTGGAGATACTGAAGCTTTCTTT	EM	15	0.984776
TGTGCCAGCAGCCAAGAGTCAGTCTCCTACAATGAGCAGTTCTTC	EM	15	1
TGTGCCACCAGCGCTGGGCCGGAGATGTACGAGCAGTACTTC	EMRA	15	0.313945
TGCAGTGCCCCCCGGCGGCAGGATGAGCAGTTCTTC	EMRA	15	0.456211
TGCGCCAGCAGCTTTTCCGGGACAGGGAACAATGAGCAGTTCTTC	EMRA	15	0.0253416
TGTGCCACCAGCGGGTCCGGCAACTACGAGCAGTACTTC	EMRA	15	0.416914
TGTGCCAGCAGTGTGGTAGGGACAGGGGCCTACGAGCAGTACGTC	EMRA	15	0
TGTGCCAGCAGCTTAGCGCAAGGTAGCTACGAGCAGTACTTC	EMRA	15	0
TGTGCCAGCAGCCGTGACAGCGCCTACGAGCAGTACTTC	EMRA	15	0.0642324
TGCAGTGCCGTCCTTCCGGGACTAGCGGGTTACAATGAGCAGTTCTTC	EMRA	15	0.180331
TGTGCCAGCAGTCCCCCCGGGACAGGGTCTGGAGATACTGAAGCTTTCTTT	EMRA	15	0.0152244
TGTGCCAGCAGCCAAGAGTCAGTCTCCTACAATGAGCAGTTCTTC	EMRA	15	0
TGTGCCACCAGCGCTGGGCCGGAGATGTACGAGCAGTACTTC	CM	45	0
TGCAGTGCCCCCCGGCGGCAGGATGAGCAGTTCTTC	CM	45	0.0148347
TGCGCCAGCAGCTTTTCCGGGACAGGGAACAATGAGCAGTTCTTC	CM	45	0
TGTGCCACCAGCGGGTCCGGCAACTACGAGCAGTACTTC	CM	45	0
TGTGCCAGCAGTGTGGTAGGGACAGGGGCCTACGAGCAGTACGTC	CM	45	0
TGTGCCAGCAGCTTAGCGCAAGGTAGCTACGAGCAGTACTTC	CM	45	0
TGTGCCAGCAGCCGTGACAGCGCCTACGAGCAGTACTTC	CM	45	0
TGCAGTGCCGTCCTTCCGGGACTAGCGGGTTACAATGAGCAGTTCTTC	CM	45	0
TGTGCCAGCAGTCCCCCCGGGACAGGGTCTGGAGATACTGAAGCTTTCTTT	CM	45	0
TGTGCCAGCAGCCAAGAGTCAGTCTCCTACAATGAGCAGTTCTTC	CM	45	0
TGTGCCACCAGCGCTGGGCCGGAGATGTACGAGCAGTACTTC	EM	45	0
TGCAGTGCCCCCCGGCGGCAGGATGAGCAGTTCTTC	EM	45	0.0373221
TGCGCCAGCAGCTTTTCCGGGACAGGGAACAATGAGCAGTTCTTC	EM	45	0.343561
TGTGCCACCAGCGGGTCCGGCAACTACGAGCAGTACTTC	EM	45	0.0295508
TGTGCCAGCAGTGTGGTAGGGACAGGGGCCTACGAGCAGTACGTC	EM	45	0.171923
TGTGCCAGCAGCTTAGCGCAAGGTAGCTACGAGCAGTACTTC	EM	45	0.458244
TGTGCCAGCAGCCGTGACAGCGCCTACGAGCAGTACTTC	EM	45	0.45575
TGCAGTGCCGTCCTTCCGGGACTAGCGGGTTACAATGAGCAGTTCTTC	EM	45	0.263754
TGTGCCAGCAGTCCCCCCGGGACAGGGTCTGGAGATACTGAAGCTTTCTTT	EM	45	0.639807
TGTGCCAGCAGCCAAGAGTCAGTCTCCTACAATGAGCAGTTCTTC	EM	45	0.496283
TGTGCCACCAGCGCTGGGCCGGAGATGTACGAGCAGTACTTC	EMRA	45	0.702246
TGCAGTGCCCCCCGGCGGCAGGATGAGCAGTTCTTC	EMRA	45	0.947843
TGCGCCAGCAGCTTTTCCGGGACAGGGAACAATGAGCAGTTCTTC	EMRA	45	0.656439
TGTGCCACCAGCGGGTCCGGCAACTACGAGCAGTACTTC	EMRA	45	0.970449
TGTGCCAGCAGTGTGGTAGGGACAGGGGCCTACGAGCAGTACGTC	EMRA	45	0.828077
TGTGCCAGCAGCTTAGCGCAAGGTAGCTACGAGCAGTACTTC	EMRA	45	0.541756
TGTGCCAGCAGCCGTGACAGCGCCTACGAGCAGTACTTC	EMRA	45	0.54425
TGCAGTGCCGTCCTTCCGGGACTAGCGGGTTACAATGAGCAGTTCTTC	EMRA	45	0.736246
TGTGCCAGCAGTCCCCCCGGGACAGGGTCTGGAGATACTGAAGCTTTCTTT	EMRA	45	0.360193
TGTGCCAGCAGCCAAGAGTCAGTCTCCTACAATGAGCAGTTCTTC	EMRA	45	0.434613
TGTGCCACCAGCGCTGGGCCGGAGATGTACGAGCAGTACTTC	P7	45	0.297754
TGCAGTGCCCCCCGGCGGCAGGATGAGCAGTTCTTC	P7	45	0
TGCGCCAGCAGCTTTTCCGGGACAGGGAACAATGAGCAGTTCTTC	P7	45	0
TGTGCCACCAGCGGGTCCGGCAACTACGAGCAGTACTTC	P7	45	0
TGTGCCAGCAGTGTGGTAGGGACAGGGGCCTACGAGCAGTACGTC	P7	45	0
TGTGCCAGCAGCTTAGCGCAAGGTAGCTACGAGCAGTACTTC	P7	45	0
TGTGCCAGCAGCCGTGACAGCGCCTACGAGCAGTACTTC	P7	45	0
TGCAGTGCCGTCCTTCCGGGACTAGCGGGTTACAATGAGCAGTTCTTC	P7	45	0
TGTGCCAGCAGTCCCCCCGGGACAGGGTCTGGAGATACTGAAGCTTTCTTT	P7	45	0
TGTGCCAGCAGCCAAGAGTCAGTCTCCTACAATGAGCAGTTCTTC	P7	45	0.0691039

## Sheet: top10_P30_CD4
CDR3	frac	day	value
TGCGCCAGCAGCTTAGGTGCGGAACTATACGAGCAGTACTTC	CM	15	0
TGTGCCAGCAGTTTTCGGCCCCTCATGAACCATCGGCAAGAGACCCAGTACTTC	CM	15	0
TGCGCCAGCAGCGGGGGTCTCCGGGGCACTGAAGCTTTCTTT	CM	15	0
TGCGCCAGCAGTCTCGGACAGGGTCTCTACGAGCAGTACTTC	CM	15	0.398668
TGCGCCAGCAGCTTGGGCAGGGGGCTCTACGAGCAGTACTTC	CM	15	0
TGCGCCAGCAGCTCCTCCGGGACAATCCGTAATGAGCAGTTCTTC	CM	15	0.180993
TGCGCCAGCAGCTTGGGACAGGGGTTGTACGAGCAGTACTTC	CM	15	0
TGCGCCAGCAGCTTGGGCAGGGGCTTATACGAGCAGTACTTC	CM	15	0
TGTGCCAGCCGCCCAGGGAATGAGCAGTTCTTC	CM	15	0.498612
TGTGCCAGCAGTCCCGGACAGGGAGTCTACGAGCAGTACTTC	CM	15	0
TGCGCCAGCAGCTTAGGTGCGGAACTATACGAGCAGTACTTC	EM	15	1
TGTGCCAGCAGTTTTCGGCCCCTCATGAACCATCGGCAAGAGACCCAGTACTTC	EM	15	1
TGCGCCAGCAGCGGGGGTCTCCGGGGCACTGAAGCTTTCTTT	EM	15	1
TGCGCCAGCAGTCTCGGACAGGGTCTCTACGAGCAGTACTTC	EM	15	0.601332
TGCGCCAGCAGCTTGGGCAGGGGGCTCTACGAGCAGTACTTC	EM	15	1
TGCGCCAGCAGCTCCTCCGGGACAATCCGTAATGAGCAGTTCTTC	EM	15	0.819007
TGCGCCAGCAGCTTGGGACAGGGGTTGTACGAGCAGTACTTC	EM	15	1
TGCGCCAGCAGCTTGGGCAGGGGCTTATACGAGCAGTACTTC	EM	15	1
TGTGCCAGCCGCCCAGGGAATGAGCAGTTCTTC	EM	15	0.501388
TGTGCCAGCAGTCCCGGACAGGGAGTCTACGAGCAGTACTTC	EM	15	1
TGCGCCAGCAGCTTAGGTGCGGAACTATACGAGCAGTACTTC	EMRA	15	0
TGTGCCAGCAGTTTTCGGCCCCTCATGAACCATCGGCAAGAGACCCAGTACTTC	EMRA	15	0
TGCGCCAGCAGCGGGGGTCTCCGGGGCACTGAAGCTTTCTTT	EMRA	15	0
TGCGCCAGCAGTCTCGGACAGGGTCTCTACGAGCAGTACTTC	EMRA	15	0
TGCGCCAGCAGCTTGGGCAGGGGGCTCTACGAGCAGTACTTC	EMRA	15	0
TGCGCCAGCAGCTCCTCCGGGACAATCCGTAATGAGCAGTTCTTC	EMRA	15	0
TGCGCCAGCAGCTTGGGACAGGGGTTGTACGAGCAGTACTTC	EMRA	15	0
TGCGCCAGCAGCTTGGGCAGGGGCTTATACGAGCAGTACTTC	EMRA	15	0
TGTGCCAGCCGCCCAGGGAATGAGCAGTTCTTC	EMRA	15	0
TGTGCCAGCAGTCCCGGACAGGGAGTCTACGAGCAGTACTTC	EMRA	15	0
TGCGCCAGCAGCTTAGGTGCGGAACTATACGAGCAGTACTTC	CM	45	0
TGTGCCAGCAGTTTTCGGCCCCTCATGAACCATCGGCAAGAGACCCAGTACTTC	CM	45	0
TGCGCCAGCAGCGGGGGTCTCCGGGGCACTGAAGCTTTCTTT	CM	45	0
TGCGCCAGCAGTCTCGGACAGGGTCTCTACGAGCAGTACTTC	CM	45	0
TGCGCCAGCAGCTTGGGCAGGGGGCTCTACGAGCAGTACTTC	CM	45	0
TGCGCCAGCAGCTCCTCCGGGACAATCCGTAATGAGCAGTTCTTC	CM	45	0
TGCGCCAGCAGCTTGGGACAGGGGTTGTACGAGCAGTACTTC	CM	45	0.264205
TGCGCCAGCAGCTTGGGCAGGGGCTTATACGAGCAGTACTTC	CM	45	0
TGTGCCAGCCGCCCAGGGAATGAGCAGTTCTTC	CM	45	0
TGTGCCAGCAGTCCCGGACAGGGAGTCTACGAGCAGTACTTC	CM	45	0
TGCGCCAGCAGCTTAGGTGCGGAACTATACGAGCAGTACTTC	EM	45	1
TGTGCCAGCAGTTTTCGGCCCCTCATGAACCATCGGCAAGAGACCCAGTACTTC	EM	45	1
TGCGCCAGCAGCGGGGGTCTCCGGGGCACTGAAGCTTTCTTT	EM	45	1
TGCGCCAGCAGTCTCGGACAGGGTCTCTACGAGCAGTACTTC	EM	45	1
TGCGCCAGCAGCTTGGGCAGGGGGCTCTACGAGCAGTACTTC	EM	45	1
TGCGCCAGCAGCTCCTCCGGGACAATCCGTAATGAGCAGTTCTTC	EM	45	1
TGCGCCAGCAGCTTGGGACAGGGGTTGTACGAGCAGTACTTC	EM	45	0.735795
TGCGCCAGCAGCTTGGGCAGGGGCTTATACGAGCAGTACTTC	EM	45	1
TGTGCCAGCCGCCCAGGGAATGAGCAGTTCTTC	EM	45	1
TGTGCCAGCAGTCCCGGACAGGGAGTCTACGAGCAGTACTTC	EM	45	1
TGCGCCAGCAGCTTAGGTGCGGAACTATACGAGCAGTACTTC	EMRA	45	0
TGTGCCAGCAGTTTTCGGCCCCTCATGAACCATCGGCAAGAGACCCAGTACTTC	EMRA	45	0
TGCGCCAGCAGCGGGGGTCTCCGGGGCACTGAAGCTTTCTTT	EMRA	45	0
TGCGCCAGCAGTCTCGGACAGGGTCTCTACGAGCAGTACTTC	EMRA	45	0
TGCGCCAGCAGCTTGGGCAGGGGGCTCTACGAGCAGTACTTC	EMRA	45	0
TGCGCCAGCAGCTCCTCCGGGACAATCCGTAATGAGCAGTTCTTC	EMRA	45	0
TGCGCCAGCAGCTTGGGACAGGGGTTGTACGAGCAGTACTTC	EMRA	45	0
TGCGCCAGCAGCTTGGGCAGGGGCTTATACGAGCAGTACTTC	EMRA	45	0
TGTGCCAGCCGCCCAGGGAATGAGCAGTTCTTC	EMRA	45	0
TGTGCCAGCAGTCCCGGACAGGGAGTCTACGAGCAGTACTTC	EMRA	45	0

## Sheet: top10_P30_CD8
CDR3	frac	day	value
TGTGCCAGCAATAAAGCTTATGAGGGCTACACCTTC	CM	15	0
TGCGCCAGCAGCTTGGCGTCGGGAGGTTCCTACGAGCAGTACTTC	CM	15	0
TGCGCCAGCAGCTTGGCGGCTAGCGGGAGCTACGAGCAGTACTTC	CM	15	0
TGCAGCGTTGGCCTCGGCAGCCAAACTGAAGCTTTCTTT	CM	15	0
TGCGCCAGCAGCCAATCGGGACCGAAAATCAGAGACCCAGTACTTC	CM	15	0
TGTGCCATCAGCCCCGAGGTCACAGATACGCAGTATTTT	CM	15	0
TGCAGTGCTCTTCTAGCGGGAAATTACAATGAGCAGTTCTTC	CM	15	0
TGTGCCACCAGCAGAGCTCCCGGATACGAGCAGTACTTC	CM	15	0
TGTGCCAGCAGCCAAGGCCTGCTAGCGGGAGGGAGCGAGACCCAGTACTTC	CM	15	0
TGTGCCGTAAAAGATGACGCCAATGAGCAGTTCTTC	CM	15	0
TGTGCCAGCAATAAAGCTTATGAGGGCTACACCTTC	EM	15	0.938317
TGCGCCAGCAGCTTGGCGTCGGGAGGTTCCTACGAGCAGTACTTC	EM	15	1
TGCGCCAGCAGCTTGGCGGCTAGCGGGAGCTACGAGCAGTACTTC	EM	15	1
TGCAGCGTTGGCCTCGGCAGCCAAACTGAAGCTTTCTTT	EM	15	0.914151
TGCGCCAGCAGCCAATCGGGACCGAAAATCAGAGACCCAGTACTTC	EM	15	0
TGTGCCATCAGCCCCGAGGTCACAGATACGCAGTATTTT	EM	15	1
TGCAGTGCTCTTCTAGCGGGAAATTACAATGAGCAGTTCTTC	EM	15	1
TGTGCCACCAGCAGAGCTCCCGGATACGAGCAGTACTTC	EM	15	1
TGTGCCAGCAGCCAAGGCCTGCTAGCGGGAGGGAGCGAGACCCAGTACTTC	EM	15	0.771712
TGTGCCGTAAAAGATGACGCCAATGAGCAGTTCTTC	EM	15	1
TGTGCCAGCAATAAAGCTTATGAGGGCTACACCTTC	EMRA	15	0.0616829
TGCGCCAGCAGCTTGGCGTCGGGAGGTTCCTACGAGCAGTACTTC	EMRA	15	0
TGCGCCAGCAGCTTGGCGGCTAGCGGGAGCTACGAGCAGTACTTC	EMRA	15	0
TGCAGCGTTGGCCTCGGCAGCCAAACTGAAGCTTTCTTT	EMRA	15	0.0858489
TGCGCCAGCAGCCAATCGGGACCGAAAATCAGAGACCCAGTACTTC	EMRA	15	1
TGTGCCATCAGCCCCGAGGTCACAGATACGCAGTATTTT	EMRA	15	0
TGCAGTGCTCTTCTAGCGGGAAATTACAATGAGCAGTTCTTC	EMRA	15	0
TGTGCCACCAGCAGAGCTCCCGGATACGAGCAGTACTTC	EMRA	15	0
TGTGCCAGCAGCCAAGGCCTGCTAGCGGGAGGGAGCGAGACCCAGTACTTC	EMRA	15	0.228288
TGTGCCGTAAAAGATGACGCCAATGAGCAGTTCTTC	EMRA	15	0
TGTGCCAGCAATAAAGCTTATGAGGGCTACACCTTC	CM	45	0
TGCGCCAGCAGCTTGGCGTCGGGAGGTTCCTACGAGCAGTACTTC	CM	45	0
TGCGCCAGCAGCTTGGCGGCTAGCGGGAGCTACGAGCAGTACTTC	CM	45	0
TGCAGCGTTGGCCTCGGCAGCCAAACTGAAGCTTTCTTT	CM	45	0
TGCGCCAGCAGCCAATCGGGACCGAAAATCAGAGACCCAGTACTTC	CM	45	0
TGTGCCATCAGCCCCGAGGTCACAGATACGCAGTATTTT	CM	45	0
TGCAGTGCTCTTCTAGCGGGAAATTACAATGAGCAGTTCTTC	CM	45	0
TGTGCCACCAGCAGAGCTCCCGGATACGAGCAGTACTTC	CM	45	0
TGTGCCAGCAGCCAAGGCCTGCTAGCGGGAGGGAGCGAGACCCAGTACTTC	CM	45	0
TGTGCCGTAAAAGATGACGCCAATGAGCAGTTCTTC	CM	45	0
TGTGCCAGCAATAAAGCTTATGAGGGCTACACCTTC	EM	45	1
TGCGCCAGCAGCTTGGCGTCGGGAGGTTCCTACGAGCAGTACTTC	EM	45	0.210842
TGCGCCAGCAGCTTGGCGGCTAGCGGGAGCTACGAGCAGTACTTC	EM	45	1
TGCAGCGTTGGCCTCGGCAGCCAAACTGAAGCTTTCTTT	EM	45	0.471061
TGCGCCAGCAGCCAATCGGGACCGAAAATCAGAGACCCAGTACTTC	EM	45	0
TGTGCCATCAGCCCCGAGGTCACAGATACGCAGTATTTT	EM	45	1
TGCAGTGCTCTTCTAGCGGGAAATTACAATGAGCAGTTCTTC	EM	45	1
TGTGCCACCAGCAGAGCTCCCGGATACGAGCAGTACTTC	EM	45	0
TGTGCCAGCAGCCAAGGCCTGCTAGCGGGAGGGAGCGAGACCCAGTACTTC	EM	45	0.348256
TGTGCCGTAAAAGATGACGCCAATGAGCAGTTCTTC	EM	45	0
TGTGCCAGCAATAAAGCTTATGAGGGCTACACCTTC	EMRA	45	0
TGCGCCAGCAGCTTGGCGTCGGGAGGTTCCTACGAGCAGTACTTC	EMRA	45	0.789158
TGCGCCAGCAGCTTGGCGGCTAGCGGGAGCTACGAGCAGTACTTC	EMRA	45	0
TGCAGCGTTGGCCTCGGCAGCCAAACTGAAGCTTTCTTT	EMRA	45	0.528939
TGCGCCAGCAGCCAATCGGGACCGAAAATCAGAGACCCAGTACTTC	EMRA	45	1
TGTGCCATCAGCCCCGAGGTCACAGATACGCAGTATTTT	EMRA	45	0
TGCAGTGCTCTTCTAGCGGGAAATTACAATGAGCAGTTCTTC	EMRA	45	0
TGTGCCACCAGCAGAGCTCCCGGATACGAGCAGTACTTC	EMRA	45	1
TGTGCCAGCAGCCAAGGCCTGCTAGCGGGAGGGAGCGAGACCCAGTACTTC	EMRA	45	0.651744
TGTGCCGTAAAAGATGACGCCAATGAGCAGTTCTTC	EMRA	45	1
