# Supplementary material for: Primary and secondary anti-viral response captured by the dynamics and phenotype of individual T cell clones
Source: eLife journal article supplement (doi:10.7554/elife.53704), 2020-02-21
Supplement: supp [file elife-53704-supp-v1.zip › elife_poa_e53704_Figure_3_source_data_2.csv]

CDR3	phen	total_em_15	total_emra_15	total_em_45	total_emra_45
TGCAGCGCCTGGAGACAATTCGAGTACACCTTC	CD8	3,96E-05	5,67E-06	5,17E-05	0
TGCAGCGTACCGGGACTGCCATCAGATGGGCAGTTCTTC	CD8	3,43E-05	0	4,50E-05	0
TGCAGCGTATATACAGGGTCATCCTACGAGCAGTACTTC	CD8	0,000263502	0	0,000279137	0
TGCAGCGTTGAACCAGGCTCTGGAAACACCATATATTTT	CD8	0,00014822	0	0,000170035	0
TGCAGCGTTGAAGACGGGAGGGGAGGGAATCAGCCCCAGCATTTT	CD8	4,94E-05	0	3,76E-05	0
TGCAGCGTTGAAGATGGGGGCTCGGATACGCAGTATTTT	CD8	0	0	6,23E-05	0
TGCAGCGTTGAAGGGGGGGACAGGGAAGACAATGAGCAGTTCTTC	CD8	7,00E-05	0	4,22E-05	0
TGCAGCGTTGAAGGTGGGGTCTCCTACGAGCAGTACTTC	CD8	9,61E-05	0	7,01E-05	0
TGCAGCGTTGAAGTTCGGGCAGACGAGCAGTACTTC	CD8	0,000194882	0	0,000130145	0
TGCAGCGTTGACGACGGAATGGGTGGCTACACCTTC	CD8	6,59E-05	0	7,02E-05	0
TGCAGCGTTGAGATAGGGATGGAGAACACTGAAGCTTTCTTT	CD8	4,80E-05	0	9,41E-05	0
TGCAGCGTTGAGGACGCGGGGGCCGATGGTTCAGATGAGCAGTTCTTC	CD8	8,23E-05	0	7,29E-05	0
TGCAGCGTTGATGCGGGCAACGCTGAAGCTTTCTTT	CD8	0,000156455	0	0,000214644	0
TGCAGCGTTGGGAGCATGAACACTGAAGCTTTCTTT	CD8	3,57E-05	0	0	0
TGCAGCGTTGGGAGGAGCCAAGAGACCCAGTACTTC	CD8	1,37E-05	0	5,61E-06	0
TGCAGCGTTTTCCTAGACTCAAGCTCCTACGAGCAGTACTTC	CD8	3,71E-05	0	5,17E-05	0
TGCAGGGCGGGAGGGGGGAATCAGCCCCAGCATTTT	CD8	0	3,43E-05	0	4,90E-05
TGCAGTCCCCGGGACAAAACTGACTATACGCAGTATTTT	CD8	4,12E-05	0	6,23E-05	0
TGCAGTGCAACAGGACTAGCGGACCAAGAGACCCAGTACTTC	CD8	5,86E-05	0	4,65E-05	0
TGCAGTGCCCGCCCCCCAGACACTGAAGCTTTCTTT	CD8	2,24E-05	0	2,43E-05	0
TGCAGTGCCGACGAACGAGGAACAGATACGCAGTATTTT	CD8	9,20E-05	0	6,35E-05	0
TGCAGTGCCGGGACAGGGTCCTACGAGCAGTACTTC	CD8	5,35E-05	0	5,03E-05	0
TGCAGTGCTAAGCGGGGGGACCCCGGGGAGCTGTTTTTT	CD8	2,88E-05	0	5,30E-05	0
TGCAGTGCTACCATAGCGGGGGGGAACAACAATGAGCAGTTCTTC	CD8	6,39E-05	0	2,39E-05	4,48E-06
TGCAGTGCTAGACTACGGGGGACGAACACCGGGGAGCTGTTTTTT	CD8	8,81E-05	0,000125992	0,000235626	3,60E-05
TGCAGTGCTAGAGAAGGGGACACTGAAGCTTTCTTT	CD8	3,84E-05	0	5,03E-05	0
TGCAGTGCTAGAGACCCAGGGGCGGGGGCCCACACCGGGGAGCTGTTTTTT	CD8	2,20E-05	0	3,97E-05	0
TGCAGTGCTAGAGACCCTATGACAGGGAACTATGGCTACACCTTC	CD8	5,79E-05	0	8,06E-05	0
TGCAGTGCTAGAGATGGACTAGCGGGGGACACCGGGGAGCTGTTTTTT	CD8	0	0	5,83E-05	0
TGCAGTGCTAGAGATGGCGGACAAATTAATTCACCCCTCCACTTT	CD8	5,22E-05	0	6,36E-05	0
TGCAGTGCTAGAGATTTGACCACCTCCTACAATGAGCAGTTCTTC	CD8	0,000149593	0	0,00022093	0
TGCAGTGCTAGAGATTTGCCGGGTAATCAGCCCCAGCATTTT	CD8	5,22E-05	0	0,000102022	0
TGCAGTGCTAGAGATTTGGCGGGGCCCTACAATGAGCAGTTCTTC	CD8	2,61E-05	0	1,93E-05	0
TGCAGTGCTAGAGCCCGGGACGAAGGAAGAGATACGCAGTATTTT	CD8	1,80E-05	6,16E-05	2,78E-05	7,29E-05
TGCAGTGCTAGAGGACTAGCGGGGGGTGAGCAGTTCTTC	CD8	4,25E-05	0	5,43E-05	0
TGCAGTGCTAGAGGAGAGGGGACGACTGAAGCTTTCTTT	CD8	8,23E-05	0	0,000114771	0
TGCAGTGCTAGAGGATACTCGAAGCAAGAGACCCAGTACTTC	CD8	2,20E-05	0	3,97E-05	0
TGCAGTGCTAGAGGATTGCGGGCTAACAATGAGCAGTTCTTC	CD8	3,29E-05	0	0	0
TGCAGTGCTAGAGGGGACAGGGCAGATACGCAGTATTTT	CD8	0,000146848	0	0,000106542	0
TGCAGTGCTAGAGGGGGACTCGACCAAGAGACCCAGTACTTC	CD8	2,74E-05	0	2,69E-05	0
TGCAGTGCTAGAGGGGGGCTAGCGGGGAGCCAAGAGACCCAGTACTTC	CD8	0,000101558	0	9,10E-05	1,49E-05
TGCAGTGCTAGAGGTGGAGACAGCTCCTACGAGCAGTACGTC	CD8	4,80E-05	0	9,94E-05	0
TGCAGTGCTAGCGAACCCGACAGGGGCGCAGATACGCAGTATTTT	CD8	3,24E-05	0	1,85E-05	0
TGCAGTGCTAGCTTGGACAGGGTCCCGGATGGCTACACCTTC	CD8	2,47E-05	0	5,43E-05	0
TGCAGTGCTAGGACAGGGATCCGCTACGAGCAGTACTTC	CD8	0,000226447	0	0,000308716	0
TGCAGTGCTAGGATTGGGCCTCACGACAATGAGCAGTTCTTC	CD8	0	6,18E-05	2,57E-06	6,76E-05
TGCAGTGCTAGGGGGACAGGGGGGGACACTGAAGCTTTCTTT	CD8	2,74E-05	0	8,21E-05	0
TGCAGTGCTAGGGTTCGCGACACTGAAGCTTTCTTT	CD8	0,00453581	0	0,008445377	0,00010229
TGCAGTGCTAGGTCGAGCGGGGACTCCTACGAGCAGTACTTC	CD8	4,39E-05	0	8,88E-05	0
TGCAGTGCTAGTGCAGGGGATAGGTATCAGCCCCAGCATTTT	CD8	4,67E-05	0	4,11E-05	0
TGCAGTGCTCGGGACAGGGAGTACGAGCAGTACTTC	CD8	4,25E-05	0	5,96E-05	0
TGCAGTGCTCGTGGAAACACCATATATTTT	CD8	0	0,003183988	2,00E-06	0,004128733
TGCAGTGCTCTCCTAGCGGGGGGACTAAGTCATGAGCAGTTCTTC	CD8	6,86E-05	0	9,27E-05	0
TGCAGTGCTGACGACAGCTATGGCTACACCTTC	CD8	0	0,000230565	0	0,000253068
TGCAGTGCTGGACAGGCCCGGACAGATACGCAGTATTTT	CD8	0	2,20E-05	0	4,90E-05
TGCAGTGCTGTTACAGGGTACTATGGCTACACCTTC	CD8	0	4,12E-05	0	7,82E-05
TGCAGTGCTTCCAAGGACAGGAACTATGGCTACACCTTC	CD8	4,80E-05	0	5,96E-05	0
TGCAGTGCTTCGACTAGCGGGGGGGCCGGTTTTAACGAGCAGTACTTC	CD8	0	4,25E-05	1,36E-06	7,15E-05
TGCAGTGCTTGGACAGGGAACACTGAAGCTTTCTTT	CD8	7,00E-05	0	0,000117922	0
TGCAGTGGGGCTAGCGGGGACCCCTACGAGCAGTACTTC	CD8	3,29E-05	0	4,37E-05	0
TGCGCCAGCAAGGAACCTCGCGTAGGGGACACTGAAGCTTTCTTT	CD8	0,000101558	0	5,67E-05	1,86E-05
TGCGCCAGCACCGCTCTTTTTGGGGGGCAACGGACAGATACGCAGTATTTT	CD8	0	2,88E-05	0	6,02E-05
TGCGCCAGCAGACAAACTGGGGGGCAGGGGGGCCTACGAGCAGTACGTC	CD8	5,76E-05	0	5,03E-05	0
TGCGCCAGCAGACAGGGTGGGGCCAACGTCCTGACTTTC	CD8	0	0	4,90E-05	0
TGCGCCAGCAGATCAGGGCCGTACAATGAGCAGTTCTTC	CD8	0	6,45E-05	1,05E-05	3,45E-05
TGCGCCAGCAGCCAAACCGATACCGGGGAGCTGTTTTTT	CD8	3,16E-05	0	2,63E-05	0
TGCGCCAGCAGCCAACAAGTGGGAGGTACCCGCGGAACGCAGTATTTT	CD8	4,53E-05	0	3,97E-05	0
TGCGCCAGCAGCCAACGGGAAGTTACTGAAGCTTTCTTT	CD8	0,0004909	5,91E-06	0,000651342	7,92E-06
TGCGCCAGCAGCCAAGAAACTAGCGGGGGGTACAATGAGCAGTTCTTC	CD8	0,000250593	1,98E-05	0,00045671	9,68E-06
TGCGCCAGCAGCCAAGAACGCGGGGGGTATGATGAGCAGTTCTTC	CD8	9,33E-05	0	0,000185495	0
TGCGCCAGCAGCCAAGAAGGGAGCTCTGGGGCCAACGTCCTGACTTTC	CD8	2,01E-05	1,15E-05	5,30E-05	0
TGCGCCAGCAGCCAAGAGACAGGCTCTGGGGCCAACGTCCTGACTTTC	CD8	0	0	6,23E-05	0
TGCGCCAGCAGCCAAGAGCGACGGGGAGTCGATGAGCAGTTCTTC	CD8	1,78E-05	0	4,50E-05	0
TGCGCCAGCAGCCAAGAGCGGGGGGGCCAAGAGACCCAGTACTTC	CD8	7,41E-05	0	9,27E-05	0
TGCGCCAGCAGCCAAGAGGCAGTTACCTACAATGAGCAGTTCTTC	CD8	2,04E-05	0	3,32E-05	0
TGCGCCAGCAGCCAAGAGTTTGGAGCTAATCAGCCCCAGCATTTT	CD8	0	5,49E-05	1,43E-05	4,40E-05
TGCGCCAGCAGCCAAGATATAGGGACTTCAAGCACAGATACGCAGTATTTT	CD8	1,13E-05	0	6,34E-06	0
TGCGCCAGCAGCCAAGATGGGGAATCCTCTGGAAACACCATATATTTT	CD8	6,59E-05	0	2,02E-05	0
TGCGCCAGCAGCCAAGATGTGGGCCTCCAAGAGACCCAGTACTTC	CD8	6,72E-05	0	6,62E-05	0
TGCGCCAGCAGCCAAGATTGGTCGACAGGCAGCACAGATACGCAGTATTTT	CD8	5,08E-05	0	3,16E-05	0
TGCGCCAGCAGCCAAGATTTCGGGGGGCCAAACATTCAGTACTTC	CD8	6,45E-05	0	0,000133821	0
TGCGCCAGCAGCCAAGCAGGGGGCTCTGGGGCCAACGTCCTGACTTTC	CD8	0,00012114	9,24E-06	0,000201394	0
TGCGCCAGCAGCCAAGCCGGGAACACTGAAGCTTTCTTT	CD8	4,39E-05	0	6,76E-05	0
TGCGCCAGCAGCCAAGCGGGGGGCTCCTACAATGAGCAGTTCTTC	CD8	0,000211351	0	0,000201394	0
TGCGCCAGCAGCCAAGGAGCTTACCGTTGGGAGCAGCCCCAGCATTTT	CD8	0	3,43E-05	0	4,83E-05
TGCGCCAGCAGCCAAGGCGCCGGGATCACACAAGAGACCCAGTACTTC	CD8	0	7,96E-05	0	0,000112622
TGCGCCAGCAGCCAAGGGACAGGGGGCTACAATGAGCAGTTCTTC	CD8	0,000359571	0	0,000684947	0
TGCGCCAGCAGCCAAGGGTCCAGCCCCTCTGGGGCCAACGTCCTGACTTTC	CD8	6,86E-05	0	8,29E-05	9,89E-06
TGCGCCAGCAGCCAAGTAAGGACGGGTTATGGCTACACCTTC	CD8	6,72E-05	0	5,50E-05	0
TGCGCCAGCAGCCAAGTGGGGGGCCCTGCAGATACGCAGTATTTT	CD8	3,71E-05	0	6,23E-05	0
TGCGCCAGCAGCCAATGGGCGAAGGACACTGAAGCTTTCTTT	CD8	0	0,00018802	0	0,000210669
TGCGCCAGCAGCCAGACTAGCGGTTCTGGGGCCAACGTCCTGACTTTC	CD8	0,000281344	0	0,000588283	0
TGCGCCAGCAGCCAGCCTCCAGGGGGTCCGAACACCGGGGAGCTGTTTTTT	CD8	0	6,59E-05	1,64E-06	7,12E-05
TGCGCCAGCAGCCAGGACAGTCCCTCTGGGGCCAACGTCCTGACTTTC	CD8	2,61E-05	0	4,37E-05	0
TGCGCCAGCAGCCAGGTGTCCGGGACTGGGGCCAACGTCCTGACTTTC	CD8	2,74E-05	0	4,37E-05	0
TGCGCCAGCAGCCCAGGAATGAACACCGGGGAGCTGTTTTTT	CD8	0,00055806	0,001775157	0,000586446	0,001815841
TGCGCCAGCAGCCCAGGACAGACTAGCACAGATACGCAGTATTTT	CD8	5,63E-05	0	3,40E-05	0
TGCGCCAGCAGCCCCAGTATAGCGGGGTTCCCAGATACGCAGTATTTT	CD8	0	4,39E-05	0	5,30E-05
TGCGCCAGCAGCCCCCCGAGGGCCGATACGCAGTATTTT	CD8	1,78E-05	0,000172977	2,75E-05	0,000187149
TGCGCCAGCAGCCCGGGGCCAGATACGCAGTATTTT	CD8	2,60E-05	3,72E-05	2,52E-05	3,31E-05
TGCGCCAGCAGCCCTAGGGAGGTGGCTGAAGCTTTCTTT	CD8	0,000168806	0	0,000242053	0
TGCGCCAGCAGCCGCAGTCCCAACTCTTACAATGAGCAGTTCTTC	CD8	4,48E-05	1,97E-05	0,000112622	0
TGCGCCAGCAGCCGCGGGCAGCAAGAGACCCAGTACTTC	CD8	5,63E-05	0	3,70E-05	0
TGCGCCAGCAGCGTCAGGGTGGGGGCCTACAATGAGCAGTTCTTC	CD8	4,80E-05	0	5,96E-05	0
TGCGCCAGCAGCTGCCTCAAGGGGAATGAGAGGCACTGAAGCTTTCTTT	CD8	2,68E-05	0,000244971	9,93E-05	0,000145805
TGCGCCAGCAGCTTAACCTTACTAGCGGGGACTCGTGAGACCCAGTACTTC	CD8	0	4,39E-05	0	5,43E-05
TGCGCCAGCAGCTTAGGGACTAACACCGGGGAGCTGTTTTTT	CD8	0	6,45E-05	0	5,70E-05
TGCGCCAGCAGCTTCGAACGAGGCACAGATACGCAGTATTTT	CD8	5,46E-05	0	2,23E-05	0
TGCGCCAGCAGCTTGAGGGGGACGACCCGGACTGATAATTCACCCCTCCACTTT	CD8	7,27E-05	0	0,000102022	0
TGCGCCAGCAGCTTGGAAATACCGGACGAGCAGTACTTC	CD8	3,29E-05	0	3,97E-05	0
TGCGCCAGCAGCTTGGAAGGACAGGGGGGGGACGAGCAGTACTTC	CD8	7,14E-05	0	5,03E-05	0
TGCGCCAGCAGCTTGGACGAGCCTACCGACAATGAGCAGTTCTTC	CD8	8,23E-05	0,016098436	0,00257096	0,015696328
TGCGCCAGCAGCTTGGCGGTTGGAGCCTACACCGGGGAGCTGTTTTTT	CD8	8,50E-05	0,000251232	7,36E-05	0,000270851
TGCGCCAGCAGCTTGGGCAGCCTACACACCTTC	CD8	4,07E-05	2,79E-05	4,14E-05	3,81E-05
TGCGCCAGCAGCTTGGGCTGGACAGGGGTTAACTATGGCTACACCTTC	CD8	3,77E-05	3,23E-05	4,96E-05	2,33E-05
TGCGCCAGCAGCTTGGGGAGGAAAGAGACCCAGTACTTC	CD8	6,94E-06	3,97E-05	0	8,21E-05
TGCGCCAGCAGCTTGGGGGACCGCCTGTATTCACCCCTCCACTTT	CD8	0	7,14E-05	0	8,48E-05
TGCGCCAGCAGCTTGGGTGGACAGGGCCACTACGAGCAGTACGTC	CD8	3,58E-05	1,64E-05	3,90E-05	1,14E-05
TGCGCCAGCAGCTTTACAGGCTCGAGCAATCAGCCCCAGCATTTT	CD8	0	0,000292323	2,45E-06	0,000344688
TGCGCCAGCAGCTTTAGCAATCCGGCAGATACGCAGTATTTT	CD8	0	0	0	0
TGCGCCAGCAGGCCTGGGGACTCCTACGAGCAGTACTTC	CD8	0	1,65E-05	0	3,97E-05
TGCGCCAGCAGTCAAAAGCAGGGCCAAGCAGAGACCCAGTACTTC	CD8	6,04E-05	0	4,11E-05	0
TGCGCCAGCAGTCAATCAGGGTACGAGCAGTACTTC	CD8	7,69E-05	0	0,00017357	0
TGCGCCAGCAGTCAATCGAAGGGTGAGCAGTTCTTC	CD8	0	5,90E-05	0	6,36E-05
TGCGCCAGCAGTCAATCGGGCTAGGGCCAGCTATGACAAGAGACCCAGTACTTC	CD8	0	0,000107048	0	0,000192119
TGCGCCAGCAGTCAATCGGGGACAGGGACCACCGGGGAGCTGTTTTTT	CD8	3,43E-05	0	3,97E-05	0
TGCGCCAGCAGTGATCTAGGGCGGGGGACTAACACCGGGGAGCTGTTTTTT	CD8	4,72E-05	0	5,83E-05	0
TGCGCCAGCAGTGGAATTGGTACGCAGTATTTT	CD8	7,43E-06	0,000114717	2,10E-06	0,000118474
TGCGCCAGCATGACAGGGCACTCCTACGAGCAGTACTTC	CD8	0	0,000452895	0	0,000536609
TGCGCCAGCCCACGCTTTAAACCGGGACAGGGAGTAGTCAGCACAGATACGCAGTATTTT	CD8	0	0,000150965	0	0,000140446
TGCGCCAGCCTAAACCCCGGGTCAGGTAATGAAAAACTGTTTTTT	CD8	4,23E-06	0,000183792	1,02E-05	0,00018061
TGCGCCAGCGGGTCCCCCTACGAGCAGTACTTC	CD8	0	0,000251151	0	0,000337865
TGTAGCAATCAGCCCCAGCATTTT	CD8	2,42E-05	2,42E-05	1,79E-05	2,35E-05
TGTCCTGGGCCTCCAGGCTGTGAGCACAGATACGCAGTATTTT	CD8	5,38E-05	7,33E-05	2,43E-05	7,39E-05
TGTGCCACCAGCAGAGAATGGGCCGTTCCGTTCAATCAGCCCCAGCATTTT	CD8	2,70E-06	7,42E-05	2,90E-05	0,000114134
TGTGCCACCAGCAGAGATACGGGGGGGCCCGGGGAGCTGTTTTTT	CD8	0,000709535	0	0,001544215	0
TGTGCCACCAGCAGAGATCGGCGGCCCCAAGAGACCCAGTACTTC	CD8	4,12E-05	0	2,74E-05	0
TGTGCCACCAGCAGAGATGGACGCCCCACAGATACGCAGTATTTT	CD8	8,51E-05	0	0,000128521	0
TGTGCCACCAGCAGAGATGTAGAGGTGTTGGCTAGCGGGGGGACCGGGGAGCTGTTTTTT	CD8	0,000594116	0,001148843	0,000935018	0,001193005
TGTGCCACCAGCAGAGATTTGGAGACCCAGTACTTC	CD8	0	2,88E-05	0	4,04E-05
TGTGCCACCAGCAGAGGGGACACTAGCGGGGCCAATGAGCAGTTCTTC	CD8	0	0	3,97E-05	0
TGTGCCACCAGCAGGGACTCCCTGACCTCCTACGAGCAGTACTTC	CD8	0	9,88E-05	0	0,000109972
TGTGCCACCAGCAGTGGGACGGGGGACACCGGGGAGCTGTTTTTT	CD8	5,76E-05	0	9,41E-05	0
TGTGCCACCAGCGGATGGGGGGAGGAAGAGACCCAGTACTTC	CD8	1,30E-05	0,000203805	9,77E-05	0,000135483
TGTGCCACCAGTGACTCCGGGACTCCGGGGGAGCAGTACTTC	CD8	1,54E-05	3,53E-05	1,34E-05	2,64E-05
TGTGCCACCAGTGATCGTCTCTACAATGAGCAGTTCTTC	CD8	0,000279381	0,000224293	0,000372758	0,00017682
TGTGCCACCAGTGATGAGAGTAGGACCTCCGGGGAGCTGTTTTTT	CD8	5,90E-05	0	8,08E-05	0
TGTGCCACCAGTGATGCAGGGGAGGGTCGGGAGACCCAGTACTTC	CD8	0	0,000941472	7,33E-05	0,000927058
TGTGCCACCAGTGATTTACAAGGTGCCGAAGAGACCCAGTACTTC	CD8	2,50E-05	5,73E-05	2,74E-05	7,20E-05
TGTGCCACCAGTGATTTAGCGGGGGACACCGGGGAGCTGTTTTTT	CD8	7,41E-05	0	0,000136471	0
TGTGCCACCAGTGATTTCCGGACCGTGGAGACCCAGTACTTC	CD8	0	6,31E-05	1,85E-05	2,92E-05
TGTGCCACCAGTGCGTCCCGGTGGGGGAGCCAAGAGACCCAGTACTTC	CD8	1,37E-05	0	4,77E-05	0
TGTGCCACCCGGGACAGCAATTCTGGAAACACCATATATTTT	CD8	0	2,47E-05	0	5,43E-05
TGTGCCACCCGGGGCCGGAATGTTAGCTCCTACAATGAGCAGTTCTTC	CD8	0	7,96E-05	0	7,55E-05
TGTGCCACCGCGGTTGACTCAGGGTACTATGGCTACACCTTC	CD8	0	5,49E-05	0	6,09E-05
TGTGCCACCGGGACTAGAGGGGGGGGTCGGTTCTTC	CD8	0,000309209	0,000817538	0,000421661	0,00106892
TGTGCCACGGGGGGGAAAGCCTCCTATAATTCACCCCTCCACTTT	CD8	3,21E-05	0,000203963	2,76E-05	0,000402975
TGTGCCACTTCACCGAGAGCGGGGGCTGCAGATACGCAGTATTTT	CD8	7,14E-05	0	4,11E-05	0
TGTGCCAGCAACCTAGCTTGGGGATCTCATGAGCAGTTCTTC	CD8	0	7,55E-05	8,71E-06	8,01E-05
TGTGCCAGCACACACCTTCGGAACATCAACACCGGGGAGCTGTTTTTT	CD8	5,26E-06	0,005792069	0,000167525	0,005557486
TGTGCCAGCACAGGCAGAAGGGGCGCCTACGAGCAGTACTTC	CD8	0	4,39E-05	0	4,24E-05
TGTGCCAGCACCAAACCCAGGGGAGAGACCCAGTACTTC	CD8	0	4,53E-05	3,97E-05	0
TGTGCCAGCACCCCTCCAGAGGAACTAGCCAAAAACATTCAGTACTTC	CD8	4,52E-05	2,07E-05	4,91E-05	9,21E-06
TGTGCCAGCACCCGGGCTAGCGGGGGGGCCGGTGAGCAGTTCTTC	CD8	0,00014273	0	3,51E-05	0
TGTGCCAGCACCCTCTCGGACCGACCCACAGATACGCAGTATTTT	CD8	3,43E-05	0	4,24E-05	0
TGTGCCAGCACTCAGCTCCCTAGGGGGGGGGAGACCCAGTACTTC	CD8	4,94E-05	0	4,11E-05	0
TGTGCCAGCAGACAGGGGATCGGGAATGAGCAGTTCTTC	CD8	8,92E-05	0	9,67E-05	0
TGTGCCAGCAGAGAGGGGGGACATGGCTACACCTTC	CD8	0	4,80E-05	2,23E-06	4,68E-05
TGTGCCAGCAGATAAAGGGAGAGGAGGCTCACCCCTCCACTTT	CD8	5,82E-06	0,000123186	9,27E-06	0,000129853
TGTGCCAGCAGATACCTAGCGGAGGGGGGGCACAATGAGCAGTTCTTC	CD8	0,00018253	0	0,000133821	0
TGTGCCAGCAGATCACTACAGGGCAATCAGCCCCAGCATTTT	CD8	0	0,002279571	1,45E-05	0,00266325
TGTGCCAGCAGCAAAGAACAGGGAAACACCGGGGAGCTGTTTTTT	CD8	3,71E-05	0	0	0
TGTGCCAGCAGCAACAGGGGCACAGATACGCAGTATTTT	CD8	3,02E-05	0	4,64E-05	0
TGTGCCAGCAGCAATCCCATTACCGAGAGCTCCTATAATTCACCCCTCCACTTT	CD8	2,05E-05	4,68E-05	6,65E-05	2,62E-05
TGTGCCAGCAGCACAACTACCCGGGACTCCACCTATAATTCACCCCTCCACTTT	CD8	0	5,49E-05	0	9,14E-05
TGTGCCAGCAGCACCGGGACAGGTTTTTACGAGCAGTACTTC	CD8	3,09E-05	8,85E-06	2,49E-05	0
TGTGCCAGCAGCACGACTAGCGGGGGTAGTGGGAACAATGAGCAGTTCTTC	CD8	0,000166769	6,15E-06	0,000166602	1,09E-05
TGTGCCAGCAGCAGTTACGAAGGGGGATATAGCAATCAGCCCCAGCATTTT	CD8	0,000105675	0	9,01E-05	0
TGTGCCAGCAGCATAAGTTCCACTGAAGCTTTCTTT	CD8	8,23E-05	0	9,27E-05	0
TGTGCCAGCAGCATCCCGGGACAGCCCACCGGGGAGCTGTTTTTT	CD8	2,48E-05	8,50E-05	4,38E-05	7,68E-05
TGTGCCAGCAGCATGGGACAGATTAGCAATCAGCCCCAGCATTTT	CD8	3,98E-05	0	2,84E-05	0
TGTGCCAGCAGCCAAAACCCCCCCGGTGGCTACACCTTC	CD8	0	0,000494889	4,28E-06	0,000666151
TGTGCCAGCAGCCAAACCGGGACTAGCGGGGGGGAGACCCAGTACTTC	CD8	6,45E-05	0	0,000108647	0
TGTGCCAGCAGCCAAACTAGCGGGGGGGCCAATGAGCAGTTCTTC	CD8	1,37E-05	0	0	0
TGTGCCAGCAGCCAACTAGGTTACTACGAGCAGTACTTC	CD8	0	6,59E-05	1,40E-05	6,15E-05
TGTGCCAGCAGCCAAGAAGCGGGGGCTGGGGCCAACGTCCTGACTTTC	CD8	4,67E-05	0	7,02E-05	0
TGTGCCAGCAGCCAAGAAGTTTGGCGCGGAGGCTACACCTTC	CD8	8,92E-05	0	6,93E-05	1,82E-05
TGTGCCAGCAGCCAAGACGTACAGGGAGATACGCAGTATTTT	CD8	0,000123517	0	8,08E-05	0
TGTGCCAGCAGCCAAGACTAAGTCCAGGCACCGGGGAGCTGTTTTTT	CD8	8,12E-05	4,64E-05	6,98E-05	2,29E-05
TGTGCCAGCAGCCAAGACTACACCGGGGAGCTGTTTTTT	CD8	3,02E-05	0	3,97E-05	0
TGTGCCAGCAGCCAAGAGCGGGGGGGCTACAATGAGCAGTTCTTC	CD8	3,02E-05	0	5,43E-05	0
TGTGCCAGCAGCCAAGAGGGATCTACCTCCTACAATGAGCAGTTCTTC	CD8	4,53E-05	0	5,03E-05	0
TGTGCCAGCAGCCAAGAGGGCGGGGGCCTTCCAGATACGCAGTATTTT	CD8	3,71E-05	0	4,20E-05	0
TGTGCCAGCAGCCAAGAGGGGGACCCCTCCACCGGGGAGCTGTTTTTT	CD8	5,63E-05	0	0,000139121	0
TGTGCCAGCAGCCAAGAGTGGGGCGGCCAGCCCCAGCATTTT	CD8	6,65E-06	3,04E-05	0	4,64E-05
TGTGCCAGCAGCCAAGATAGCGGCTCTGGGGCCAACGTCCTGACTTTC	CD8	5,08E-05	0	9,01E-05	0
TGTGCCAGCAGCCAAGATAGGGGGGGGGTCTACAATGAGCAGTTCTTC	CD8	6,59E-05	0	9,14E-05	0
TGTGCCAGCAGCCAAGATCCGGGGGGGGCCACCGGGGAGCTGTTTTTT	CD8	3,71E-05	0	7,51E-05	7,05E-06
TGTGCCAGCAGCCAAGATCGAGCGGGGGGCACAGATACGCAGTATTTT	CD8	8,37E-05	0	0,000125871	0
TGTGCCAGCAGCCAAGATCGGGGGGGCACAGATACGCAGTATTTT	CD8	3,71E-05	0	6,76E-05	0
TGTGCCAGCAGCCAAGATCGGGGGGGCCCAGATACGCAGTATTTT	CD8	3,16E-05	0	6,89E-05	0
TGTGCCAGCAGCCAAGATGGGACCGGCGAGCAGGGGCTTGAACACTGAAGCTTTCTTT	CD8	0,000212723	0	0,000221269	0
TGTGCCAGCAGCCAAGATGGGGGCTCTGGGGCCAACGTCCTGACTTTC	CD8	7,82E-05	0	0,000141746	6,65E-06
TGTGCCAGCAGCCAAGATGTAGGGACAGGGGGGCATGAGCAGTTCTTC	CD8	0,000112538	0	5,35E-05	1,41E-05
TGTGCCAGCAGCCAAGCACTAGCGGGGGGTACAGATACGCAGTATTTT	CD8	0,00014273	0	0,000199522	0
TGTGCCAGCAGCCAAGCTAGCGGGGGGGCCAATGAGCAGTTCTTC	CD8	0,000149593	0	0,000309162	8,83E-06
TGTGCCAGCAGCCAAGGACAGGGGGACACCGGGGAGCTGTTTTTT	CD8	7,04E-05	1,47E-05	0,000128521	0
TGTGCCAGCAGCCAAGGACTAGCTCAAGAGACCCAGTACTTC	CD8	0,00014822	0	0,000290167	0
TGTGCCAGCAGCCAAGGGACTAGCGGGAGCTCCTACGAGCAGTACTTC	CD8	0,000354022	0,000162004	0,000496975	0,000165506
TGTGCCAGCAGCCAAGGGGAAGAACACTGAAGCTTTCTTT	CD8	0	2,47E-05	0	3,97E-05
TGTGCCAGCAGCCAAGTAGTGATAGCGGTGTCACAAGAGACCCAGTACTTC	CD8	0	6,04E-05	2,84E-06	6,34E-05
TGTGCCAGCAGCCAAGTATTGGTCGGGCCAAACACCGGGGAGCTGTTTTTT	CD8	0	5,35E-05	2,55E-06	4,52E-05
TGTGCCAGCAGCCAAGTTGGGTTTTATTCACCCCTCCACTTT	CD8	5,76E-05	0	7,27E-05	4,15E-06
TGTGCCAGCAGCCAATGGGGGGGTACGCCCTACGAGCAGTACTTC	CD8	4,38E-06	0,009649145	0,000365887	0,012272078
TGTGCCAGCAGCCAGGACAGGTTTTTCCGCTACACCTTC	CD8	0	5,08E-05	0	5,03E-05
TGTGCCAGCAGCCAGGGAACCGGGGAGCTGTTTTTT	CD8	0,000406233	0	0,000315341	0
TGTGCCAGCAGCCAGGGGGCCGGGACTAGCCGATCCTACAATGAGCAGTTCTTC	CD8	0	4,67E-05	0	5,43E-05
TGTGCCAGCAGCCATAGCTCCTACGAGCAGTACGTC	CD8	0	0,000141358	0	0,000214644
TGTGCCAGCAGCCATCGGGACTATGGCTACACCTTC	CD8	0	3,57E-05	0	4,37E-05
TGTGCCAGCAGCCATGGGCCGGGACAGGGGGCGACCTATAATTCACCCCTCCACTTT	CD8	3,98E-05	0	3,05E-05	1,72E-05
TGTGCCAGCAGCCATGGGCCGTCCTACGAGCAGTACTTC	CD8	3,84E-05	0	1,93E-05	0
TGTGCCAGCAGCCCAAAGACCTCTAGCGGGGGGGCCCGGTCCTACGAGCAGTACTTC	CD8	0,000102931	0	0,00013267	5,13E-06
TGTGCCAGCAGCCCAACAGGGTTTAGCAATCAGCCCCAGCATTTT	CD8	2,26E-05	3,10E-05	7,09E-06	5,12E-05
TGTGCCAGCAGCCCAAGGGCAGGGAAGGGTGAGCAGTTCTTC	CD8	0,005781489	0,013850815	0,0132269	0,008668201
TGTGCCAGCAGCCCAGCGGGTAATGAGCAGTTCTTC	CD8	3,95E-05	0	1,68E-05	0
TGTGCCAGCAGCCCAGGCTTGGGGCTCTATGGCTACACCTTC	CD8	0	9,33E-05	2,14E-06	0,000123731
TGTGCCAGCAGCCCAGGGGTGGCTACCGGGGAGCTGTTTTTT	CD8	3,29E-05	0	4,11E-05	0
TGTGCCAGCAGCCCCCAGCGGGGGGGCCGTGATACGCAGTATTTT	CD8	7,55E-05	0	8,74E-05	0
TGTGCCAGCAGCCCCCGCCCGAGAGGGAAAGAGACCCAGTACTTC	CD8	0	2,88E-05	0	4,50E-05
TGTGCCAGCAGCCCCGAGGGACGGCACAATGAGCAGTTCTTC	CD8	0	0,003410435	9,76E-05	0,003823743
TGTGCCAGCAGCCCCGGACAAACTGAAGCTTTCTTT	CD8	4,13E-05	6,75E-06	6,96E-05	1,52E-05
TGTGCCAGCAGCCCCGGCCATACTGGAAACACCATATATTTT	CD8	5,47E-05	1,25E-05	8,60E-05	9,41E-06
TGTGCCAGCAGCCCCGGCGGAGGGCGTGCAACTAATGAAAAACTGTTTTTT	CD8	0,000242916	0	0,000797627	0
TGTGCCAGCAGCCCCGGCTACGAGCAGTACTTC	CD8	0,000636901	0,000101455	0,000966132	2,76E-05
TGTGCCAGCAGCCCCGGGACAGGGGGCTACAATGAGCAGTTCTTC	CD8	3,16E-05	9,05E-05	0,00010129	1,66E-05
TGTGCCAGCAGCCCCGGGTTGGTATGGGTGAAAAACTGTTTTTT	CD8	0	4,94E-05	4,72E-06	6,82E-05
TGTGCCAGCAGCCCCTCCGTCTCCTACGAGCAGTACTTC	CD8	9,16E-05	2,10E-05	9,41E-05	0
TGTGCCAGCAGCCCGACTAGCGGGGGGTCCCTCGTAGCCAAAAACATTCAGTACTTC	CD8	0,000112538	0	0,00011581	0
TGTGCCAGCAGCCCGCCGGAGGGGTACAATGAGCAGTTCTTC	CD8	6,86E-05	0	2,22E-05	0
TGTGCCAGCAGCCCGCCGGGACAGCACAATGAGCAGTTCTTC	CD8	5,11E-05	0,012314204	0,000129671	0,01513639
TGTGCCAGCAGCCCGGACAGTTACGAGCAGTACTTC	CD8	0	0,000275854	2,61E-05	0,000274633
TGTGCCAGCAGCCCGGGGTTTGGGGACAAGAACAATGAGCAGTTCTTC	CD8	2,50E-05	2,86E-05	5,17E-05	0
TGTGCCAGCAGCCCGTGAACAAAAGCGGGGGGGACAAGAGACCCAGTACTTC	CD8	1,59E-05	5,00E-05	5,07E-06	5,32E-05
TGTGCCAGCAGCCCTCGGGAGGGAGAGACCCAGTACTTC	CD8	0,000103953	0	0,000111262	0
TGTGCCAGCAGCCCTGGACAGGCAACAGATACGCAGTATTTT	CD8	3,84E-05	0	0,000102022	0
TGTGCCAGCAGCCCTGGGTATGAGCAGTTCTTC	CD8	0,000458732	1,75E-05	0,000518013	9,32E-06
TGTGCCAGCAGCCCTTCAGTCAGCTACGAGCAGTACTTC	CD8	0,000135675	7,06E-06	0,00018682	0
TGTGCCAGCAGCCGAGGGGCCTCCGGGTACAATGAGCAGTTCTTC	CD8	0,000386179	0,000171019	0,000462007	0,000188549
TGTGCCAGCAGCCGGGGAGGGGCTTTGAACACTGAAGCTTTCTTT	CD8	0,000143126	6,82E-05	0,000189787	7,12E-05
TGTGCCAGCAGCCGTCACATCCCCTCTGGAAACACCATATATTTT	CD8	1,16E-05	1,99E-05	5,03E-05	0
TGTGCCAGCAGCCGTTACGAGGGCGGTTATAGCAATCAGCCCCAGCATTTT	CD8	0,000166061	0	9,44E-05	0
TGTGCCAGCAGCCTACCCCCGACAGCGAACACTGAAGCTTTCTTT	CD8	0	0,000130379	2,46E-06	0,000177735
TGTGCCAGCAGCCTAGGACTAGCGGGGGGGAATGAGCAGTTCTTC	CD8	0,000732866	0	0,000698044	0
TGTGCCAGCAGCCTATACACCGGGACCCCTAATGGCTACACCTTC	CD8	3,47E-05	0,000224721	2,63E-05	0,000235993
TGTGCCAGCAGCCTATCCGGGACATCAAATCAGCCCCAGCATTTT	CD8	3,10E-05	0	3,59E-06	0
TGTGCCAGCAGCCTCCAAGAAGACAGGAAGCAGTTCTTC	CD8	6,04E-05	0	6,49E-05	0
TGTGCCAGCAGCGAAACCCCCGGACAGGGATCCGGGGAGCTGTTTTTT	CD8	0	4,53E-05	1,50E-05	3,27E-05
TGTGCCAGCAGCGACAGTCAAGAGACCCAGTACTTC	CD8	2,61E-05	0	5,30E-05	0
TGTGCCAGCAGCGACGGACAGGGGGCTGATGGCTACACCTTC	CD8	8,00E-05	9,15E-05	9,60E-05	3,60E-05
TGTGCCAGCAGCGAGAGTGGGGCGGCAGATACGCAGTATTTT	CD8	0	3,98E-05	4,05E-05	1,78E-05
TGTGCCAGCAGCGCACTCGACAGGGACACCTACGAGCAGTACTTC	CD8	0,00082619	0	0,000772772	3,44E-05
TGTGCCAGCAGCGCAGTCGCGAACACCGGGGAGCTGTTTTTT	CD8	1,67E-05	0,000613186	2,15E-06	0,000716055
TGTGCCAGCAGCGCATTGGGAAATGAGCAGTTCTTC	CD8	0,000125168	7,96E-06	0,000128521	0
TGTGCCAGCAGCGCCACCCTGGGCGAGCAGTTCTTC	CD8	3,85E-05	0,000415726	7,24E-05	0,000336981
TGTGCCAGCAGCGCCCCAGCGGGGGTCGGCGAGCAGTACTTC	CD8	0,023136526	0,001533371	0,025894978	0,001642642
TGTGCCAGCAGCGGGAAGGGACTAGCGGGAGAGACCCAGTACTTC	CD8	0,000297813	0	0,00023414	1,23E-05
TGTGCCAGCAGCGGGACAGCGGCCTACACCTTC	CD8	0	0	5,56E-05	0
TGTGCCAGCAGCGGGACAGGGAACTATGGCTACACCTTC	CD8	0	0,000577784	0	0,000747278
TGTGCCAGCAGCGTAGAGAATGGGACAGGGATACGAGCAGTACTTC	CD8	1,78E-05	0	5,30E-05	0
TGTGCCAGCAGCGTAGCGGGGGTTGAAGAGACCCAGTACTTC	CD8	0	0,000170179	0	0,000210669
TGTGCCAGCAGCGTAGCTAACAGTCAAGAGACCCAGTACTTC	CD8	6,45E-05	0	4,37E-05	0
TGTGCCAGCAGCGTAGGGACGGGCACTGAAGCTTTCTTT	CD8	0,000177041	0	0,000234496	1,06E-05
TGTGCCAGCAGCGTCGGACAGGGTGCCTACGAGCAGTACTTC	CD8	2,88E-05	0	4,11E-05	0
TGTGCCAGCAGCGTTGGACTAGCGGGTAACAATGAGCAGTTCTTC	CD8	7,14E-05	0	5,17E-05	0
TGTGCCAGCAGCTACACTAGCACAGATACGCAGTATTTT	CD8	0,000165027	4,50E-05	0,000195178	7,54E-06
TGTGCCAGCAGCTACGAGGGCGGGGGAAATTACGAGCAGTACTTC	CD8	7,95E-05	1,52E-05	6,62E-05	0
TGTGCCAGCAGCTCCCCAGGGGGTACGGCAAGGAACACTGAAGCTTTCTTT	CD8	8,04E-05	1,84E-05	7,95E-05	0
TGTGCCAGCAGCTCCCGACTAGCGGGGACCTACAATGAGCAGTTCTTC	CD8	9,33E-05	0	4,23E-05	0
TGTGCCAGCAGCTCCCTGACGTCAAGTCAGTACTTC	CD8	1,47E-05	1,68E-05	3,57E-06	3,75E-05
TGTGCCAGCAGCTCGAAACAGGAATTCACTGAAGCTTTCTTT	CD8	0	4,80E-05	0	4,50E-05
TGTGCCAGCAGCTCGGGACTAGAAGGGACCCAGTACTTC	CD8	0	0	2,84E-05	0
TGTGCCAGCAGCTCGTAACAGGGGACTACGAGCAGTACGTC	CD8	4,80E-05	6,87E-06	5,17E-05	1,85E-05
TGTGCCAGCAGCTGGTACAGGGGATCTGAAGCTTTCTTT	CD8	6,18E-05	0	5,17E-05	0
TGTGCCAGCAGCTTAAACAGGGTAGAAGCTTTCTTT	CD8	1,78E-05	0	4,24E-05	0
TGTGCCAGCAGCTTAAATAGGGGGCCCCAAGAGACCCAGTACTTC	CD8	0	6,86E-05	0	7,29E-05
TGTGCCAGCAGCTTACAGGACTATAATTCACCCCTCCACTTT	CD8	4,91E-05	1,40E-05	5,14E-05	1,35E-05
TGTGCCAGCAGCTTACCACCCTACGAGCAGTACTTC	CD8	7,91E-06	9,50E-05	0	9,54E-05
TGTGCCAGCAGCTTAGAACACCCTTGGACTAGCGGGGGGGGTTTTCTCGATGAGCAGTTCTTC	CD8	2,91E-05	9,99E-05	6,18E-05	9,59E-05
TGTGCCAGCAGCTTAGAAGGGGACAGGGGTTCAGATACGCAGTATTTT	CD8	1,61E-05	0,001090012	0,000354917	0,000829598
TGTGCCAGCAGCTTAGAGCGGAGAGGCGGCACTGAAGCTTTCTTT	CD8	3,43E-05	0	3,97E-05	0
TGTGCCAGCAGCTTAGATCCCTTCTTAGGACGGCCTAACTATGGCTACACCTTC	CD8	3,62E-06	7,05E-05	8,45E-06	7,77E-05
TGTGCCAGCAGCTTAGATCTTAGTACCTACAATGAGCAGTTCTTC	CD8	9,74E-05	0	9,81E-05	0
TGTGCCAGCAGCTTAGATGGCAGGGGGCGGGAAGAGACCCAGTACTTC	CD8	0	0	5,70E-05	0
TGTGCCAGCAGCTTAGATGGCGGGAATCAGCCCCAGCATTTT	CD8	8,22E-05	0	1,47E-05	4,82E-06
TGTGCCAGCAGCTTAGCCGGGGATGACTACGAGCAGTACTTC	CD8	0	8,23E-05	0	0,000104672
TGTGCCAGCAGCTTAGCGAACGGGAATGGCTACACCTTC	CD8	0	0,000178413	0	0,000245118
TGTGCCAGCAGCTTAGCGTCAGGGGGGTCCTACAATGAGCAGTTCTTC	CD8	4,39E-05	0	5,43E-05	0
TGTGCCAGCAGCTTAGCGTTGGTTCCCTACAATGAGCAGTTCTTC	CD8	0	0,000344475	1,98E-05	0,000322068
TGTGCCAGCAGCTTAGGACTAGCGGGGGGCAATGAGCAGTTCTTC	CD8	0,001198426	1,78E-05	0,001007852	6,85E-05
TGTGCCAGCAGCTTAGGAGGAAAGACCCAGTACTTC	CD8	0	0	5,63E-05	2,05E-05
TGTGCCAGCAGCTTAGGCCTAATGAGGAGGGTCGATTTCTTT	CD8	0,000160935	0,000197264	0,000211893	0,000278343
TGTGCCAGCAGCTTAGGGACAGGGGGTGGCTACACCTTC	CD8	1,93E-05	3,97E-05	2,59E-05	4,16E-05
TGTGCCAGCAGCTTAGGGGTAACAGGGTTGAACACTGAAGCTTTCTTT	CD8	3,43E-05	0	2,78E-05	0
TGTGCCAGCAGCTTAGGGTCAGGGGGCACTGAAGCTTTCTTT	CD8	0,002017905	0,000379692	0,003129775	0,000215752
TGTGCCAGCAGCTTAGGTCTCTCCTACGAGCAGTACTTC	CD8	0,000101558	0	4,60E-05	0
TGTGCCAGCAGCTTAGTAGCTAGCGGGGGGGGCACAGATACGCAGTATTTT	CD8	0,000693066	0	0,000700123	0
TGTGCCAGCAGCTTAGTGCAGCGGGGAAAAAACATTCAGTACTTC	CD8	0	8,78E-05	0	7,15E-05
TGTGCCAGCAGCTTAGTGGCGATTAGGGACAATGAGCAGTTCTTC	CD8	6,04E-05	0	0	0
TGTGCCAGCAGCTTAGTGGGGACAGGGGTCTATGACACCATATATTTT	CD8	1,43E-05	6,53E-05	1,46E-05	8,61E-05
TGTGCCAGCAGCTTAGTTATGGAGGCTGGCACAGATACGCAGTATTTT	CD8	7,41E-05	0	7,02E-05	0
TGTGCCAGCAGCTTAGTTGGAGCGGGGAACAATGAGCAGTTCTTC	CD8	8,65E-05	0	8,21E-05	0
TGTGCCAGCAGCTTATACCGGGACTCCCCCAGGCCCCAGCATTTT	CD8	0,000139061	0,000566357	0,000164238	0,000636443
TGTGCCAGCAGCTTATGGGATACTGGCCCCCTAGAGACCCAGTACTTC	CD8	0	0,000214096	0	0,000255718
TGTGCCAGCAGCTTATTGTCCCCGGAGTACTACAATGAGCAGTTCTTC	CD8	4,39E-05	0	5,30E-05	0
TGTGCCAGCAGCTTCAAAGACAGGCCCTTCGGCAATCAGCCCCAGCATTTT	CD8	0	7,14E-05	0	8,74E-05
TGTGCCAGCAGCTTCAATCGGAGGCAGTTCTTC	CD8	9,80E-05	1,73E-05	0,000123947	1,25E-05
TGTGCCAGCAGCTTCGGAACTAGCGGGGGAGAAGAGACCCAGTACTTC	CD8	3,02E-05	0	5,17E-05	0
TGTGCCAGCAGCTTCGGGACTAGCGTCTTGATCTCCCAGTTCTTC	CD8	0,000192869	2,21E-05	0,000127809	7,30E-06
TGTGCCAGCAGCTTCTCCAGCACAGATACGCAGTATTTT	CD8	2,49E-05	0,000113755	6,80E-05	6,45E-05
TGTGCCAGCAGCTTCTTAGCGGGGGCGAACACCGGGGAGCTGTTTTTT	CD8	1,66E-05	0	3,24E-05	0
TGTGCCAGCAGCTTGACGGACGGGAACCGAGTAGATACGCAGTATTTT	CD8	0,00028818	2,75E-05	0,000103664	0
TGTGCCAGCAGCTTGAGCTCCGGGACAGGGAACTACGAGCAGTACTTC	CD8	0,000149593	0	0,000112622	0
TGTGCCAGCAGCTTGCAAGGACAGGGGCTCTTCGGCACTAATGAAAAACTGTTTTTT	CD8	3,92E-06	0,000763252	1,20E-05	0,000870377
TGTGCCAGCAGCTTGGAAGGGTACGGGACGCCGGCTGAAGCTTTCTTT	CD8	0	0,011897833	0,001032606	0,015139
TGTGCCAGCAGCTTGGATGGGACTTCGTACAATGAGCAGTTCTTC	CD8	0,000234025	0,005685313	0,003260679	0,00387438
TGTGCCAGCAGCTTGGCCCCTGGCAGGTGGCACACTGAAGCTTTCTTT	CD8	0	9,47E-05	0	6,89E-05
TGTGCCAGCAGCTTGGGCAGGGGGTATGAGACCCAGTACTTC	CD8	9,65E-05	0,000533459	0,000357231	0,000371497
TGTGCCAGCAGCTTGGGGACAGGTGCGTGGGATGGCTACACCTTC	CD8	0	0	4,11E-05	0
TGTGCCAGCAGCTTGTGGGGGACTACTCAAGAGACCCAGTACTTC	CD8	1,77E-05	0	2,03E-05	0
TGTGCCAGCAGCTTTCTTAGCGGGGGGATCAATGAGCAGTTCTTC	CD8	9,74E-05	0	6,19E-05	0
TGTGCCAGCAGCTTTGGGGAAAAACTGTTTTTT	CD8	0,000138604	2,88E-05	0,000186561	2,94E-05
TGTGCCAGCAGCTTTGGGTACGAGCAGTACTTC	CD8	1,43E-05	0,000131146	3,88E-05	9,63E-05
TGTGCCAGCAGCTTTGGTCATTATCGGGGTGAGCAGTTCTTC	CD8	0,0001194	0	2,00E-05	0
TGTGCCAGCAGGAAAAAAATGAACACTGAAGCTTTCTTT	CD8	0,000112538	0	5,10E-05	0
TGTGCCAGCAGGACCTATAGCGGGGGGGCCCGGGAGACCCAGTACTTC	CD8	1,85E-05	0,000173629	1,57E-05	0,000164507
TGTGCCAGCAGGCCAGGAAACACCATATATTTT	CD8	0,000134496	0	0,000117922	0
TGTGCCAGCAGGGCCATGAAGGGCTCCTATAATTCACCCCTCCACTTT	CD8	0,001998624	5,09E-06	0,002758977	1,49E-05
TGTGCCAGCAGGGGATTTAGACAGGGTGGTGGAAACACCATATATTTT	CD8	7,62E-06	0,000135111	1,35E-05	0,000244891
TGTGCCAGCAGGGTGGGGACAGTGGGGAATGAGCAGTTCTTC	CD8	9,22E-05	1,62E-05	0,000113705	3,73E-05
TGTGCCAGCAGTACCGGGACTAGCTTTTACGAGCAGTACTTC	CD8	0,00010842	0	9,14E-05	0
TGTGCCAGCAGTACGGACGTACAGGGCGAGCAGTACGTC	CD8	0	0,001382015	2,49E-05	0,001650231
TGTGCCAGCAGTAGCGGGGACACCGGGGAGCTGTTTTTT	CD8	3,71E-05	0	7,55E-05	0
TGTGCCAGCAGTCACGGGCCATCCTACGAGCAGTACGTC	CD8	0	5,40E-05	1,28E-05	8,40E-06
TGTGCCAGCAGTCACTCCCTACAGGGGACAGCAACTAATGAAAAACTGTTTTTT	CD8	0	0,002311767	1,48E-05	0,002854207
TGTGCCAGCAGTCAGGGACAGGGGGTCCTCAATCAGCCCCAGCATTTT	CD8	9,24E-06	0,000539262	2,92E-05	0,000564342
TGTGCCAGCAGTCAGGGGAGTAGAGTCAATGAGCAGTTCTTC	CD8	9,94E-05	4,94E-06	0,000131171	0
TGTGCCAGCAGTCAGGGTGGGGTTACGCCCCTCCACTTT	CD8	0	4,94E-05	0	4,24E-05
TGTGCCAGCAGTCAGTCCGACTTCTACAATGAGCAGTTCTTC	CD8	0	0,000466619	0	0,000539259
TGTGCCAGCAGTCCAACCGGGCCTCAGACCTACTATGGCTACACCTTC	CD8	7,55E-05	0	6,23E-05	0
TGTGCCAGCAGTCCCCGCTTCTATCAAGGGGCTGGAAACACCATATATTTT	CD8	1,28E-05	6,82E-05	5,68E-05	6,64E-05
TGTGCCAGCAGTCCCCTTTGCCCCAAATAAGCTCCTATAATTCACCCCTCCACTTT	CD8	0,00014822	0	0,000264702	0
TGTGCCAGCAGTCCCGGGACAGGGGGCTACAATGAGCAGTTCTTC	CD8	0	0,000130379	1,60E-05	0,000100636
TGTGCCAGCAGTCCGCCTCGGGACAGCCACAACAATGAGCAGTTCTTC	CD8	0	4,80E-05	0	5,17E-05
TGTGCCAGCAGTCCGGGCTATGAGCAGTTCTTC	CD8	2,24E-05	2,56E-05	7,95E-05	0
TGTGCCAGCAGTCTAAGCGGGGGCCCAGCCAATGAGCAGTTCTTC	CD8	8,92E-05	0	5,91E-05	1,11E-05
TGTGCCAGCAGTGAAAAGGATTCCTATAATTCACCCCTCCACTTT	CD8	1,40E-05	7,99E-06	2,41E-05	3,16E-05
TGTGCCAGCAGTGAAACGAACAGTTGGAGCAATCAGCCCCAGCATTTT	CD8	3,02E-05	0	4,24E-05	0
TGTGCCAGCAGTGAAACTAGCGGGGGGGCACATGAGCAGTTCTTC	CD8	2,33E-05	0	4,77E-05	0
TGTGCCAGCAGTGAAAGAGGGAGCACAGATACGCAGTATTTT	CD8	2,45E-05	7,02E-06	3,71E-05	9,74E-06
TGTGCCAGCAGTGAAAGCGGGGGGGCCACAGATACGCAGTATTTT	CD8	2,61E-05	0	4,24E-05	0
TGTGCCAGCAGTGAACGGACGAGCTCCTACGAGCAGTACTTC	CD8	0	5,76E-05	3,03E-06	0,000101638
TGTGCCAGCAGTGAACTAGCGGGGGGGCCAGATACGCAGTATTTT	CD8	2,88E-05	0	5,03E-05	0
TGTGCCAGCAGTGAAGAAAGAATGCGATTCGACGAGCAGTACGTC	CD8	0	3,29E-05	0	5,17E-05
TGTGCCAGCAGTGAAGCGGGGGGCTCCTACAATGAGCAGTTCTTC	CD8	8,78E-05	0	0,000158995	0
TGTGCCAGCAGTGAAGGGGCAGTCCTCGAGCAGTACGTC	CD8	3,43E-05	0	5,43E-05	0
TGTGCCAGCAGTGAAGTGCCAGGATGGGATACGCAGTATTTT	CD8	6,87E-05	3,15E-05	0,000123545	2,62E-05
TGTGCCAGCAGTGAATTAGCGGGGGAGGTCAATGAGCAGTTCTTC	CD8	0,000109065	2,27E-05	0,000207378	0
TGTGCCAGCAGTGACAACTCTGGGGCCAACGTCCTGACTTTC	CD8	3,95E-05	1,13E-05	9,67E-05	0
TGTGCCAGCAGTGACAGCGGGGGGGCCACAGATACGCAGTATTTT	CD8	3,02E-05	0	5,70E-05	0
TGTGCCAGCAGTGACAGGGACACCGGGGAGCTGTTTTTT	CD8	4,94E-05	0	0,000128521	0
TGTGCCAGCAGTGACAGGGGCACCGGGGAGCTGTTTTTT	CD8	0,000104303	0	0,000182845	0
TGTGCCAGCAGTGACAGGGTTGGGGCCAACGTCCTGACTTTC	CD8	4,12E-05	0	9,14E-05	0
TGTGCCAGCAGTGACCGGGCCTGGGACAGCAATCAGCCCCAGCATTTT	CD8	4,15E-05	0,000110822	0,000193062	4,41E-05
TGTGCCAGCAGTGACGGACTAGCCACAGATACGCAGTATTTT	CD8	3,43E-05	0	5,43E-05	0
TGTGCCAGCAGTGACGGACTAGCTAGCACAGATACGCAGTATTTT	CD8	0,000185275	0	0,000292816	0
TGTGCCAGCAGTGACGGGACTAGCACCGGGGAGCTGTTTTTT	CD8	5,08E-05	0	7,82E-05	0
TGTGCCAGCAGTGACGGGGGGCAGGTCACAGATACGCAGTATTTT	CD8	5,22E-05	0	5,96E-05	0
TGTGCCAGCAGTGACGGGGGGGCGACAGATACGCAGTATTTT	CD8	5,49E-05	0	0,000100697	0
TGTGCCAGCAGTGACTCAGCGGGGGGCACAGATACGCAGTATTTT	CD8	0,000112917	9,23E-06	0,00018682	0
TGTGCCAGCAGTGACTCAGCGGGGGGGCCCAATGAGCAGTTCTTC	CD8	3,02E-05	0	3,89E-05	0
TGTGCCAGCAGTGACTCGACAGGGGCTGGGGCCAACGTCCTGACTTTC	CD8	0,002018296	0	0,003400708	2,96E-05
TGTGCCAGCAGTGACTCGACAGGGGGCACAGATACGCAGTATTTT	CD8	3,71E-05	0	7,82E-05	0
TGTGCCAGCAGTGACTCGACAGGGGGCGCAGATACGCAGTATTTT	CD8	3,43E-05	0	4,37E-05	0
TGTGCCAGCAGTGACTCGACTAGCGGGGCAGATACGCAGTATTTT	CD8	0	0	9,27E-05	0
TGTGCCAGCAGTGACTCGACTAGCGGGGGGGATACGCAGTATTTT	CD8	2,47E-05	0	4,50E-05	0
TGTGCCAGCAGTGACTCGACTAGCGGGGGGGATGAGCAGTTCTTC	CD8	1,24E-05	0	3,97E-05	0
TGTGCCAGCAGTGACTCGAGCGGGGGGGCAAATGAGCAGTTCTTC	CD8	6,31E-05	0	0,000116471	3,06E-05
TGTGCCAGCAGTGACTCGGCAGGGGGCACAGATACGCAGTATTTT	CD8	7,82E-05	0	0,000120571	0
TGTGCCAGCAGTGACTCTAGCACAGATACGCAGTATTTT	CD8	3,16E-05	0	5,70E-05	0
TGTGCCAGCAGTGACTTGGTATTTTGCAATCAGCCCCAGCATTTT	CD8	5,47E-06	0,000156473	1,68E-05	0,000192588
TGTGCCAGCAGTGAGACTAGCGGGGGCACAGATACGCAGTATTTT	CD8	8,65E-05	0	0,000131171	0
TGTGCCAGCAGTGAGAGTCCGGGGGAGACCCAGTACTTC	CD8	3,25E-05	0,000195303	0,000259195	4,86E-05
TGTGCCAGCAGTGAGGCGAACACCGGGGAGCTGTTTTTT	CD8	3,84E-05	0	3,97E-05	0
TGTGCCAGCAGTGAGGGGAGCACAGATACGCAGTATTTT	CD8	3,98E-05	0	5,56E-05	0
TGTGCCAGCAGTGCAGGGGCAGGCAATCAGCCCCAGCATTTT	CD8	3,99E-06	0,000616338	0,000130933	0,000715717
TGTGCCAGCAGTGCAGGGGGCGGGTCCCAGTACTTC	CD8	8,37E-05	6,84E-06	0,000120571	0
TGTGCCAGCAGTGCCGGCACCAGTGATCAAGAGACCCAGTACTTC	CD8	7,82E-05	0	0,000113947	0
TGTGCCAGCAGTGGGACAGGGGGCACAGATACGCAGTATTTT	CD8	3,80E-05	8,69E-06	6,89E-05	0
TGTGCCAGCAGTGGGACTAGCGGAACCTACAATGAGCAGTTCTTC	CD8	0,000152337	0	0,000218592	7,98E-06
TGTGCCAGCAGTGGGACTAGCGGTAGCACAGATACGCAGTATTTT	CD8	4,39E-05	0	5,62E-05	7,38E-06
TGTGCCAGCAGTTACAGCGGGGGGGGGGAGACCCAGTACTTC	CD8	0	9,33E-05	0	9,94E-05
TGTGCCAGCAGTTACCTCCGGACTGTACAAGAGACCCAGTACTTC	CD8	0,000102931	0	7,95E-05	0
TGTGCCAGCAGTTACGAGGTAGCGGGGGCAAATGAGCAGTTCTTC	CD8	6,72E-05	0	9,41E-05	0
TGTGCCAGCAGTTACGAGTGGGACAGGGGGCTGGGCGGCTACACCTTC	CD8	0	2,74E-05	0	4,24E-05
TGTGCCAGCAGTTACTACCCCGGTCGGGGCACTGAAGCTTTCTTT	CD8	0,000157466	2,09E-05	0,000211302	1,26E-05
TGTGCCAGCAGTTACTCCCCGGCAGGGAGAACACGGGGGAGCTGTTTTTT	CD8	0	4,53E-05	1,21E-05	3,96E-05
TGTGCCAGCAGTTACTCCGGGACAGGGGGCTACGAGCAGTACGTC	CD8	3,71E-05	0	6,09E-05	0
TGTGCCAGCAGTTACTCGACAGGGGGCAATGAGCAGTTCTTC	CD8	2,20E-05	0	5,43E-05	0
TGTGCCAGCAGTTACTCGACCACCGGGGAGCTGTTTTTT	CD8	7,82E-05	0	8,21E-05	0
TGTGCCAGCAGTTACTCGACCAGGGGAGGCTACACCTTC	CD8	6,31E-05	0	4,80E-05	0
TGTGCCAGCAGTTACTCGACTAGCGGGGGGAATGAGCAGTTCTTC	CD8	0,00014273	0	0,000209344	0
TGTGCCAGCAGTTACTCGACTGGGACATCGGGTGGCTACACCTTC	CD8	5,63E-05	0	5,04E-05	6,62E-06
TGTGCCAGCAGTTACTCGATGGACAGGCACACAGATACGCAGTATTTT	CD8	0,000820778	1,23E-05	0,000861225	0
TGTGCCAGCAGTTACTCGGGACTAGCGGGGGGAGAGACCCAGTACTTC	CD8	5,76E-05	0	0,000101951	6,70E-06
TGTGCCAGCAGTTAGGACCACCGGGGAGCTGTTTTTT	CD8	2,71E-05	4,43E-06	7,55E-05	0
TGTGCCAGCAGTTATACCTCCGGAGGACAGCGTCTCACAGATACGCAGTATTTT	CD8	1,88E-05	7,87E-05	8,63E-06	9,07E-05
TGTGCCAGCAGTTCCAATGGTTTCGGTGGCTACACCTTC	CD8	7,66E-06	0,000144673	4,88E-06	0,000147489
TGTGCCAGCAGTTCCCCCTACGAGCAGTACTTC	CD8	0	3,29E-05	1,42E-05	3,74E-05
TGTGCCAGCAGTTCCCTCACTAGCGGGGGGATTTCCTACGAGCAGTACTTC	CD8	1,65E-05	0	4,50E-05	0
TGTGCCAGCAGTTCCGGGACAGATTCCTACAATGAGCAGTTCTTC	CD8	3,84E-05	0	4,50E-05	0
TGTGCCAGCAGTTCCTGGACTGTACTAGCCAAAAACATTCAGTACTTC	CD8	0	2,61E-05	0	4,77E-05
TGTGCCAGCAGTTCCTTTCCCCGCAGCGAGCAGTACGTC	CD8	7,68E-06	8,79E-06	3,77E-05	5,37E-05
TGTGCCAGCAGTTCTCCGGGGGTGAGCTCCTACAATGAGCAGTTCTTC	CD8	2,57E-05	0	2,26E-05	0
TGTGCCAGCAGTTTAACAGATACGCAGTATTTT	CD8	0,00010842	0	6,45E-05	0
TGTGCCAGCAGTTTAAGTAGCGGGGGCCTAGATACGCAGTATTTT	CD8	0	0	7,95E-05	0
TGTGCCAGCAGTTTAATAGCGGGGGTATACAATGAGCAGTTCTTC	CD8	2,18E-05	2,49E-05	2,61E-05	2,29E-05
TGTGCCAGCAGTTTAATCTCCCTAGCTAACTATGGCTACACCTTC	CD8	7,03E-06	0,000185102	3,51E-06	0,00031316
TGTGCCAGCAGTTTACAGGGGAGAGGGACTGAAGCTTTCTTT	CD8	1,59E-05	0	2,48E-05	0
TGTGCCAGCAGTTTACCAGGCGGAAACATTCAGTACTTC	CD8	3,98E-05	0	5,17E-05	0
TGTGCCAGCAGTTTACTTATAGCGGGGGGGCAAGGCGGGGAGCTGTTTTTT	CD8	1,92E-05	1,65E-05	2,20E-05	2,17E-05
TGTGCCAGCAGTTTAGACAGCACACAAGAGACCCAGTACTTC	CD8	2,88E-05	2,20E-05	4,69E-05	8,79E-06
TGTGCCAGCAGTTTAGACAGGGTCTACACTGAAGCTTTCTTT	CD8	0	7,27E-05	0	7,29E-05
TGTGCCAGCAGTTTAGCGCTAGGCAGGAGCTATGGCTACACCTTC	CD8	0	3,71E-05	0	4,90E-05
TGTGCCAGCAGTTTAGGGCAGTCCCCCGATCAGCCCCAGCATTTT	CD8	4,53E-05	0	5,43E-05	0
TGTGCCAGCAGTTTAGGGGGGGGCGACCACCTCGGGCAGTATTTT	CD8	0	5,49E-05	1,78E-05	2,33E-05
TGTGCCAGCAGTTTAGGTAACAATGAGCAGTTCTTC	CD8	3,06E-05	8,75E-05	5,71E-05	2,50E-05
TGTGCCAGCAGTTTATCTGACGGCTATGGCTACACCTTC	CD8	2,74E-05	0	5,03E-05	0
TGTGCCAGCAGTTTATTAGCGGGGTCTTCCTACGAGCAGTACTTC	CD8	4,52E-06	0,000785987	0,000148711	0,000836488
TGTGCCAGCAGTTTCATGCCAGACCGAAATGAAAAACTGTTTTTT	CD8	7,14E-05	0	0,000100697	0
TGTGCCAGCAGTTTCCTCGCGGGGGGGCCTTACAATGAGCAGTTCTTC	CD8	0	0,000133124	1,56E-05	0,000111553
TGTGCCAGCAGTTTCGGACTAGCGGGTGGGAATGAGCAGTTCTTC	CD8	0,000207873	1,03E-05	0,000257043	0
TGTGCCAGCAGTTTCGGGGGGGTGTACAATGAGCAGTTCTTC	CD8	0	7,27E-05	0	0,000102022
TGTGCCAGCAGTTTGACTAGCACAGATACGCAGTATTTT	CD8	4,94E-05	0	7,82E-05	0
TGTGCCAGCAGTTTGATCCCCGGTCCGAGTGGCGGCTACACCTTC	CD8	5,02E-05	5,27E-05	3,39E-05	8,01E-05
TGTGCCAGCAGTTTGGGCGGGGGGTACAATGAGCAGTTCTTC	CD8	0	4,67E-05	1,47E-05	0,000135035
TGTGCCAGCAGTTTGGGTCAGGGGGCAATAGAGACCCAGTACTTC	CD8	5,08E-05	0	8,08E-05	0
TGTGCCAGCAGTTTTAACAGCTTGAGGGGCTACACCTTC	CD8	0,000261289	1,87E-05	0,000198638	7,83E-05
TGTGCCAGCAGTTTTCCGGGGCCGCGCGCCCCCGATACGCAGTATTTT	CD8	0	5,35E-05	0	4,90E-05
TGTGCCAGCAGTTTTGGCGGGGGGGCCGGTGAGCAGTACTTC	CD8	2,51E-05	8,61E-05	8,72E-06	0,000114505
TGTGCCAGCAGTTTTTGGACACCCTACGAGCAGTACTTC	CD8	9,19E-06	0,024459044	0,000135654	0,026155216
TGTGCCAGCATCAAAAGCCGCCGGGTGGGGCGCACCGGGGAGCTGTTTTTT	CD8	0	5,35E-05	0	7,02E-05
TGTGCCAGCATCGCGAGGACGGCCTGGGGTTATGGCTACACCTTC	CD8	3,01E-05	0	4,24E-05	0
TGTGCCAGCATCGGGGGCGAATACGAGCAGTACTTC	CD8	0	0,000186648	0	0,000201394
TGTGCCAGCCCCCAGGGGGGCGTACGAGCAGTACGTC	CD8	0	9,88E-05	8,80E-06	0,00010117
TGTGCCAGCGAGTTATACGCGGGGTCAGATACGCAGTATTTT	CD8	0,000123517	0	0,000105997	0
TGTGCCAGCGCAAGTGCTAACTATGGCTACACCTTC	CD8	1,61E-05	0,000667403	3,07E-05	0,000977634
TGTGCCAGCGGGCCGGACAGCAGCTCCTACAATGAGCAGTTCTTC	CD8	5,08E-05	0	2,18E-05	0
TGTGCCAGCGGGCCTGGGGGTGGGGAGACCCAGTACTTC	CD8	3,98E-05	0	1,95E-05	2,56E-05
TGTGCCAGCGGGCGGTTGGGGGCTTTCTTT	CD8	0,00075208	0	0,000838236	0
TGTGCCAGCTCAACCTCAGGCTACGAGCAGTACTTC	CD8	6,80E-05	0	1,92E-05	0
TGTGCCAGCTCACCAGGGTACACCGGGGAGCTGTTTTTT	CD8	4,58E-05	0	1,57E-05	0
TGTGCCAGCTCACCAGTCACGAGCGGGGGGTACTCTGGCACAGATACGCAGTATTTT	CD8	2,56E-05	2,93E-05	2,06E-05	2,71E-05
TGTGCCAGCTCACCCTCCGGACGGTATAGCAATCAGCCCCAGCATTTT	CD8	0	5,22E-05	0	8,48E-05
TGTGCCAGCTCACCGAAGGCCTACGTGGTAGCGGGGAAAGAGACCCAGTACTTC	CD8	0	7,27E-05	0	0,000100697
TGTGCCAGCTCAGCACAGGGGGCGGATAGCACAGATACGCAGTATTTT	CD8	2,52E-05	3,61E-06	3,35E-05	6,28E-06
TGTGCCAGCTCCTCCTCGGGTAGCGCGACAGATACGCAGTATTTT	CD8	0,003627707	3,39E-05	0,004568915	6,17E-05
TGTGCCAGCTGGGGGGGACTAGCGCTCACCGGGGAGCTGTTTTTT	CD8	6,72E-05	0	2,84E-05	0
TGTGCCAGTAAGGGACAGGGGGACACCGGGGAGCTGTTTTTT	CD8	1,78E-05	0	4,24E-05	0
TGTGCCAGTAGAAGATCCCCGATGGCTGGCTACACCTTC	CD8	5,06E-05	2,90E-05	2,34E-05	6,14E-05
TGTGCCAGTAGAATGTTCCAGGGAGCTAACTATGGCTACACCTTC	CD8	2,55E-05	5,83E-05	5,84E-05	7,67E-05
TGTGCCAGTAGCAGAGGGGCAGGGGCACCTAATCAGCCCCAGCATTTT	CD8	3,84E-05	0	4,32E-05	7,10E-06
TGTGCCAGTAGGAGTGCTGGGCCCTACACTGAAGCTTTCTTT	CD8	0,000136441	0,000246461	0,000144998	0,000338613
TGTGCCAGTAGTATACTGACTAGCGAAGTCAATGAGCAGTTCTTC	CD8	0,000290951	0	0,000311366	0
TGTGCCAGTAGTATTGCCGGCGGTTCCTACGAGCAGTACTTC	CD8	4,94E-05	0	5,96E-05	0
TGTGCCAGTAGTCCCAGACAGTACTATGGCTACACCTTC	CD8	0	6,45E-05	0	8,61E-05
TGTGCCAGTAGTCCCCTGGACCCACACCGGGGAGCTGTTTTTT	CD8	0	5,08E-05	7,41E-06	3,90E-05
TGTGCCAGTAGTTACGCAGGAGGCACTGAAGCTTTCTTT	CD8	8,10E-05	0	0,000113947	0
TGTGCCAGTAGTTCGCGGGGGGGCCATGATGAGCAGTTCTTC	CD8	8,37E-05	0	6,09E-05	0
TGTGCCAGTCCCTGGCCTCGCGGGAGGTCCTACGAGCAGTACGTC	CD8	1,74E-05	2,65E-05	1,50E-05	3,54E-05
TGTGCCAGTGGACGTGGTACTGAAGCTTTCTTT	CD8	7,27E-05	0	9,14E-05	0
TGTGCCAGTGGGACCCGGGAGACCCAGTACTTC	CD8	5,31E-05	6,08E-05	5,69E-05	1,87E-05
TGTGCCATCAGACCGACAGAAAGCTCTGGGGCCAACGTCCTGACTTTC	CD8	0	3,29E-05	3,26E-05	7,14E-06
TGTGCCATCAGATCTGGAGTTGCCGGCTACGAGCAGTACGTC	CD8	2,17E-05	7,10E-06	5,09E-05	7,43E-06
TGTGCCATCAGTGACCCGACAGCTACCCTAATTCCCAATTCGGCCCTCCACTTT	CD8	8,98E-06	2,40E-05	1,94E-05	2,04E-05
TGTGCCATCAGTGAGTCACGGAGGTTCACTGAAGCTTTCTTT	CD8	0,002006164	4,28E-05	0,002193489	6,96E-05
TGTGCCATCAGTGAGTCCCAACAGGGGACCGGGGAGCTGTTTTTT	CD8	0,000118027	0	6,43E-05	0
TGTGCCATCAGTGAGTCGACGCGGCACCCGTGGATTGAAAAACTGTTTTTT	CD8	0	0,000149593	0	0,000164295
TGTGCCATCAGTGAGTCGGACACAGATACGCAGTATTTT	CD8	4,25E-05	0	9,27E-05	0
TGTGCCATCAGTGATTTTGACAGGGTGGGTCAGCCCCAGCATTTT	CD8	0	2,33E-05	0	4,11E-05
TGTGCCATCATGAGGGATACGACTGGAAACACCATATATTTT	CD8	3,61E-05	5,31E-05	4,51E-05	8,88E-05
TGTGCCATCCAGGACAGGGATGTGACCGGGGAGCTGTTTTTT	CD8	3,71E-05	0	5,03E-05	0
TGTGCCGCGGGGGGGAGCTCCTACAATGAGCAGTTCTTC	CD8	4,87E-06	4,45E-05	3,48E-05	2,74E-05
TGTGCCTGGAACGGGGGGCAATACTATGGCTACACCTTC	CD8	8,78E-05	0	5,37E-05	5,49E-05
TGTGCCTGGAGTGTACAGGTCCAGTACGAGCAGTACTTC	CD8	0,00019351	0	0,000260105	0
TGTGCTAGCGCCCCGGGGGCCACCGGGGAGCTGTTTTTT	CD8	4,25E-05	0	4,37E-05	0
