# Supplementary material for: Primary and secondary anti-viral response captured by the dynamics and phenotype of individual T cell clones
Source: eLife journal article supplement (doi:10.7554/elife.53704), 2020-02-21
Supplement: supp [file elife-53704-supp-v1.zip › elife_poa_e53704_Figure_3_source_data_3.csv]

CDR3	phen	total_em_15	total_emra_15	total_em_45	total_emra_45
TGCAGTGCCCCCCGGCGGCAGGATGAGCAGTTCTTC	CD8	0,000123886	0,000103934	5,93E-06	0,000150703
TGCAGTGCCGGGACAGCGGCAACTAATGAAAAACTGTTTTTT	CD8	0,000273109	0	5,30E-05	0
TGCAGTGCCGTCCTTCCGGGACTAGCGGGTTACAATGAGCAGTTCTTC	CD8	0,000246358	5,42E-05	2,80E-05	7,80E-05
TGCAGTGCTCCGACTGGCGGGGGGTCCAACGAGCAGTACTTC	CD8	0,000499097	2,38E-05	1,38E-05	4,84E-05
TGCGCCAGCAGCCCCGGGACAGGAGCGGGCTATGGCTACACCTTC	CD8	0,000204074	3,34E-05	1,28E-05	2,69E-05
TGCGCCAGCAGCCCCTCTCCAGGGGAGGCCTATGGCTACACCTTC	CD8	3,57E-05	0	1,35E-05	6,20E-05
TGCGCCAGCAGCGGGGCGGGGGGGTACGAGCAGTACTTC	CD8	0,000107963	4,57E-06	0	4,11E-05
TGCGCCAGCAGCTTTTCCGGGACAGGGAACAATGAGCAGTTCTTC	CD8	0,000295616	7,69E-06	5,28E-05	0,000100892
TGTGCCACCAGCAGAGCCCCAGGGTACGAGCAGTACGTC	CD8	5,22E-05	0	0	5,96E-05
TGTGCCACCAGCAGAGGAGAAAACACTGAAGCTTTCTTT	CD8	1,51E-05	0	0	6,49E-05
TGTGCCACCAGCAGAGTCGAACTTCGCCAAGGGTCCCAGTACTTC	CD8	0,000110465	1,58E-05	1,50E-05	6,58E-05
TGTGCCACCAGCGCCAGCACAGGGCTTGAGCAGTTCTTC	CD8	3,88E-05	8,88E-05	7,54E-06	6,93E-05
TGTGCCACCAGCGCTGGGCCGGAGATGTACGAGCAGTACTTC	CD8	0,001030516	0,000136031	0,000101633	0,000372703
TGTGCCACCAGCGGGTCCGGCAACTACGAGCAGTACTTC	CD8	0,00010323	7,38E-05	3,84E-06	0,000126009
TGTGCCACCAGCGTGACAGGGGGGAATTCACCCCTCCACTTT	CD8	1,51E-05	0	6,36E-06	3,34E-05
TGTGCCACCAGTCCTGGTACGGCCTACGAGCAGTACTTC	CD8	9,03E-05	3,18E-05	7,63E-06	4,01E-05
TGTGCCAGCAATGGAGCGGGGGGATACGAGCAGTACTTC	CD8	0,001142919	0	1,14E-05	3,50E-05
TGTGCCAGCAGCATAGGACTAGGAGGCACAAGTGAGCAGTTCTTC	CD8	8,82E-05	5,04E-05	1,06E-05	3,71E-05
TGTGCCAGCAGCCAAGAGTCAGTCTCCTACAATGAGCAGTTCTTC	CD8	2,01E-05	6,91E-05	3,88E-06	9,68E-05
TGTGCCAGCAGCCAAGATGTGGCAGGGGGCTATGGCTACACCTTC	CD8	4,90E-05	8,63E-06	1,11E-05	3,40E-05
TGTGCCAGCAGCCAAGATTCCCCAGTCTACAATGAGCAGTTCTTC	CD8	9,60E-05	6,87E-05	1,28E-05	3,36E-05
TGTGCCAGCAGCCAAGCCACTGCGTACGAGCAGTACTTC	CD8	0,000265396	7,08E-05	7,00E-06	4,60E-05
TGTGCCAGCAGCCACGAGACAAACACTGAAGCTTTCTTT	CD8	3,63E-05	1,04E-05	3,57E-06	3,75E-05
TGTGCCAGCAGCCCCCGGACAGTAGATGAGCAGTTCTTC	CD8	0,0001194	0	1,14E-05	3,50E-05
TGTGCCAGCAGCCCCCGGGACAGACTAAACACTGAAGCTTTCTTT	CD8	7,27E-05	0	1,61E-05	6,34E-05
TGTGCCAGCAGCCCCGGGGCGGCCTACGAGCAGTACTTC	CD8	0,000123067	1,01E-05	3,18E-05	2,39E-05
TGTGCCAGCAGCCCTGCCCCCGCGTACGAGCAGTACTTC	CD8	0,000147154	0,000112231	0	4,77E-05
TGTGCCAGCAGCCGTGACAGCGCCTACGAGCAGTACTTC	CD8	0,000459763	3,16E-05	4,95E-05	5,91E-05
TGTGCCAGCAGCCTAGGAGGGGCCTACGAGCAGTACTTC	CD8	0,000106028	9,43E-05	5,37E-06	5,29E-05
TGTGCCAGCAGCCTTGGGACTAGCGGGGTGTACGAGCAGTACTTC	CD8	0,000131751	0	1,12E-05	5,90E-05
TGTGCCAGCAGCGACCGGGACAGGCTCCTTAATACGCAGTATTTT	CD8	0,000170179	0	5,36E-06	5,98E-05
TGTGCCAGCAGCGCAGGGACAGGGTCCTACGAGCAGTACTTC	CD8	0,000691605	6,73E-05	7,00E-06	4,60E-05
TGTGCCAGCAGCGGACAGGGGGCGTACGAGCAGTACTTC	CD8	0,000100186	0	1,95E-06	5,37E-05
TGTGCCAGCAGCGGTGGAATGGATACGCAGTATTTT	CD8	0	3,29E-05	2,42E-06	4,13E-05
TGTGCCAGCAGCGTAGGAGGGGTTTCCTACAATGAGCAGTTCTTC	CD8	7,41E-05	0	2,22E-05	2,91E-05
TGTGCCAGCAGCGTAGGGCAGGGCTTAACCTACGAGCAGTACTTC	CD8	7,55E-05	0	0	4,37E-05
TGTGCCAGCAGCGTAGGGGGGGTCTCCTACAATGAGCAGTTCTTC	CD8	2,88E-05	0	5,22E-06	4,12E-05
TGTGCCAGCAGCGTAGGTGCAGGGGCAGCGAACACTGAAGCTTTCTTT	CD8	0	0	0	5,17E-05
TGTGCCAGCAGCGTGGGGGGGGCCTTCTACAATGAGCAGTTCTTC	CD8	1,37E-05	0	6,36E-06	3,34E-05
TGTGCCAGCAGCTTAGCGCAAGGTAGCTACGAGCAGTACTTC	CD8	0,000177041	0	5,71E-05	6,75E-05
TGTGCCAGCAGTCCCCCCGGGACAGGGTCTGGAGATACTGAAGCTTTCTTT	CD8	0,000551418	8,52E-06	6,70E-05	3,77E-05
TGTGCCAGCAGTGCCGCACCAGGGGATCGGAATGAGCAGTTCTTC	CD8	1,50E-05	3,44E-05	0	5,56E-05
TGTGCCAGCAGTGCCGGGTGGATCTCCTACGAGCAGTACTTC	CD8	3,84E-05	0	0	5,56E-05
TGTGCCAGCAGTGTGGTAGGGACAGGGGCCTACGAGCAGTACGTC	CD8	0,000120772	0	2,16E-05	0,000104231
TGTGCCAGCAGTTACCCGGGACAGGCTTTCCTTTCTTACGAGCAGTACTTC	CD8	2,33E-05	0	0	5,30E-05
TGTGCCAGCTCGGCCGGGCCAGCGGGAACCTACGAGCAGTACGTC	CD8	7,47E-05	2,14E-05	1,39E-05	3,65E-05
TGTGCCATCAGTGAAGGGGGAAATGAAAAACTGTTTTTT	CD8	0,000164689	0	2,83E-05	2,47E-05
TGTGCCATCAGTGAATCCGGGACAGCATACAATGAGCAGTTCTTC	CD8	9,33E-05	0	1,21E-05	3,17E-05
TGTGCCGTCGACTCTAGCGGGGTCACAGATACGCAGTATTTT	CD8	0,00014273	0	7,94E-06	8,35E-05
TGTGCCTGGAGTGCGGGCCTGGCCTACGAGCAGTACTTC	CD8	2,33E-05	0	3,25E-05	2,85E-05
