# Supplementary material for: Primary and secondary anti-viral response captured by the dynamics and phenotype of individual T cell clones
Source: eLife journal article supplement (doi:10.7554/elife.53704), 2020-02-21
Supplement: supp [file elife-53704-supp-v1.zip › elife_poa_e53704_Figure_4_source_data_1.xlsx]

## Sheet: NS4B+ TCRalpha donor M1
	CDR3.nucleotide.sequence	bestVGene	bestDGene	bestJGene	bestVFamily	bestJFamily	CDR3.amino.acid.sequence	nSeqCDR3	refPoints
1	TCTTTAAAGGGCATGCGCTTT	TRAV5		TRAJ43	TRAV5	TRAJ43	SLKGMRF	TCTTTAAAGGGCATGCGCTTT	:::::::::0:-12:1:::::11:-13:21:::
2	TGCCTCGTGGGTGACAAGCCGCATGACATGCGCTTT	TRAV4		TRAJ43	TRAV4	TRAJ43	CLVGDKPHDMRF	TGCCTCGTGGGTGACAAGCCGCATGACATGCGCTTT	:::::::::0:0:16:::::22:-9:36:::
3	TGCGCTGTGAGACCTAATAACTATGGTCAGAATTTTGTCTTT	TRAV1-1		TRAJ26	TRAV1	TRAJ26	CAVRPNNYGQNFVF	TGCGCTGTGAGACCTAATAACTATGGTCAGAATTTTGTCTTT	:::::::::0:-2:12:::::16:-3:42:::
4	TGCGCTGTGAGAGATCCGGGTGCTACAAACAAGCTCATCTTT	TRAV1-1		TRAJ32	TRAV1	TRAJ32	CAVRDPGATNKLIF	TGCGCTGTGAGAGATCCGGGTGCTACAAACAAGCTCATCTTT	:::::::::0:2:16:::::18:-11:42:::
5	TGCGCTGTGAGAGGGCCAAATTCTGGGGGTTACCAGAAAGTTACCTTT	TRAV1-1		TRAJ13	TRAV1	TRAJ13	CAVRGPNSGGYQKVTF	TGCGCTGTGAGAGGGCCAAATTCTGGGGGTTACCAGAAAGTTACCTTT	:::::::::0:-1:13:::::18:-2:48:::
6	TGCGCTGTGGGCTATGGGAACAACAGACTCGCTTTT	TRAV1-1		TRAJ7	TRAV1	TRAJ7	CAVGYGNNRLAF	TGCGCTGTGGGCTATGGGAACAACAGACTCGCTTTT	:::::::::0:-5:9:::::11:-3:36:::
7	TGTACCGCCTCGATTAACACCGACAAGCTCATCTTT	TRAV12-2		TRAJ34	TRAV12	TRAJ34	CTASINTDKLIF	TGTACCGCCTCGATTAACACCGACAAGCTCATCTTT	:::::::::0:-6:7:::::14:-5:36:::
8	TGTGCACCAGGAGGAGGAGGTGCTGACGGACTCACCTTT	TRAV13-2		TRAJ45	TRAV13	TRAJ45	CAPGGGGADGLTF	TGTGCACCAGGAGGAGGAGGTGCTGACGGACTCACCTTT	:::::::::0:-7:6:::::11:-7:39:::
9	TGTGCAGAAATTTATGGAAACAAGCTGGTCTTT	TRAV27		TRAJ47	TRAV27	TRAJ47	CAEIYGNKLVF	TGTGCAGAAATTTATGGAAACAAGCTGGTCTTT	:::::::::0:-3:7:::::12:-5:33:::
10	TGTGCAGAGAATTTAGGCACCGGTAACCAGTTCTATTTT	TRAV13-2		TRAJ49	TRAV13	TRAJ49	CAENLGTGNQFYF	TGTGCAGAGAATTTAGGCACCGGTAACCAGTTCTATTTT	:::::::::0:-1:12:::::17:-3:39:::
11	TGTGCAGAGAGTCATACGGGGTACAGCAGTGCTTCCAAGATAATCTTT	TRAV5		TRAJ3	TRAV5	TRAJ3	CAESHTGYSSASKIIF	TGTGCAGAGAGTCATACGGGGTACAGCAGTGCTTCCAAGATAATCTTT	:::::::::0:-1:12:::::16:1:48:::
12	TGTGCAGATCTAGAAGGAAACACACCTCTTGTCTTT	TRAV13-2		TRAJ29	TRAV13	TRAJ29	CADLEGNTPLVF	TGTGCAGATCTAGAAGGAAACACACCTCTTGTCTTT	:::::::::0:-5:8:::::14:-7:36:::
13	TGTGCAGCAAACGATAACACCGACAAGCTCATCTTT	TRAV29DV5		TRAJ34	TRAV29	TRAJ34	CAANDNTDKLIF	TGTGCAGCAAACGATAACACCGACAAGCTCATCTTT	:::::::::0:-3:10:::::13:-4:36:::
14	TGTGCAGCAAGGCAATGGGGAGGTGCTGACGGACTCACCTTT	TRAV23DV6		TRAJ45	TRAV23	TRAJ45	CAARQWGGADGLTF	TGTGCAGCAAGGCAATGGGGAGGTGCTGACGGACTCACCTTT	:::::::::0:-2:11:::::18:-11:42:::
15	TGTGCAGCAAGTGATTACTTTGGAAATGAGAAATTAACCTTT	TRAV13-1		TRAJ48	TRAV13	TRAJ48	CAASDYFGNEKLTF	TGTGCAGCAAGTGATTACTTTGGAAATGAGAAATTAACCTTT	:::::::::0:-1:12:::::16:-6:42:::
16	TGTGCAGCAAGTGCGGGAGGAAGCCAAGGAAATCTCATCTTT	TRAV23DV6		TRAJ42	TRAV23	TRAJ42	CAASAGGSQGNLIF	TGTGCAGCAAGTGCGGGAGGAAGCCAAGGAAATCTCATCTTT	:::::::::0:-2:11:::::15:-8:42:::
17	TGTGCAGCAGAAGGTGGTACTAGCTATGGAAAGCTGACATTT	TRAV29DV5		TRAJ52	TRAV29	TRAJ52	CAAEGGTSYGKLTF	TGTGCAGCAGAAGGTGGTACTAGCTATGGAAAGCTGACATTT	:::::::::0:-4:9:::::12:-8:42:::
18	TGTGCAGCCCTCGAAACCCTTGGCTCTAGCAACACAGGCAAACTAATCTTT	TRAV13-1	TRDD1	TRAJ37	TRAV13	TRAJ37	CAALETLGSSNTGKLIF	TGTGCAGCCCTCGAAACCCTTGGCTCTAGCAACACAGGCAAACTAATCTTT	:::::::::0:-5:8:10:2:-4:16:20:0:51:::
19	TGTGCAGCGTCGGGCAGGAGAGCACTTACTTTT	TRAV13-1		TRAJ5	TRAV13	TRAJ5	CAASGRRALTF	TGTGCAGCGTCGGGCAGGAGAGCACTTACTTTT	:::::::::0:-5:8:::::10:-6:33:::
20	TGTGCAGCTAAGCGGGGAGGAAAGCTTATCTTC	TRAV29DV5		TRAJ23	TRAV29	TRAJ23	CAAKRGGKLIF	TGTGCAGCTAAGCGGGGAGGAAAGCTTATCTTC	:::::::::0:0:14:::::14:-13:33:::
21	TGTGCAGCTTATTATGGCCAGAAGCTGCTCTTT	TRAV13-1		TRAJ16	TRAV13	TRAJ16	CAAYYGQKLLF	TGTGCAGCTTATTATGGCCAGAAGCTGCTCTTT	:::::::::0:-5:8:::::13:-9:33:::
22	TGTGCAGGAGCCGACACCTTTTCAGATGGCCAGAAGCTGCTCTTT	TRAV27		TRAJ16	TRAV27	TRAJ16	CAGADTFSDGQKLLF	TGTGCAGGAGCCGACACCTTTTCAGATGGCCAGAAGCTGCTCTTT	:::::::::0:1:11:::::18:-2:45:::
23	TGTGCAGGAGTGGGCTCTAGCAACACAGGCAAACTAATCTTT	TRAV27		TRAJ37	TRAV27	TRAJ37	CAGVGSSNTGKLIF	TGTGCAGGAGTGGGCTCTAGCAACACAGGCAAACTAATCTTT	:::::::::0:0:10:::::12:-1:42:::
24	TGTGCAGTCCTATCAGGAGGAAGCTACATACCTACATTT	TRAV5		TRAJ6	TRAV5	TRAJ6	CAVLSGGSYIPTF	TGTGCAGTCCTATCAGGAGGAAGCTACATACCTACATTT	:::::::::0:-6:7:::::11:-3:39:::
25	TGTGCAGTCTTTCCCAACACCAATGCAGGCAAATCAACCTTT	TRAV12-2		TRAJ27	TRAV12	TRAJ27	CAVFPNTNAGKSTF	TGTGCAGTCTTTCCCAACACCAATGCAGGCAAATCAACCTTT	:::::::::0:-8:5:::::15:-1:42:::
26	TGTGCAGTGACGAAGGAGAATAGAGGCTCAACCCTGGGGGGGCTATACTTT	TRAV12-2	TRDD2	TRAJ18	TRAV12	TRAJ18	CAVTKENRGSTLGGLYF	TGTGCAGTGACGAAGGAGAATAGAGGCTCAACCCTGGGGGGGCTATACTTT	:::::::::0:-3:10:11:5:-9:16:21:-5:51:::
27	TGTGCCATGACGGGAACCTACAAATACATCTTT	TRAV12-2		TRAJ40	TRAV12	TRAJ40	CAMTGTYKYIF	TGTGCCATGACGGGAACCTACAAATACATCTTT	:::::::::0:-3:10:::::12:-9:33:::
28	TGTGCCCCAAAGGGTGGAGGCTTCAAAACTATCTTT	TRAV13-1		TRAJ9	TRAV13	TRAJ9	CAPKGGGFKTIF	TGTGCCCCAAAGGGTGGAGGCTTCAAAACTATCTTT	:::::::::0:-8:5:::::14:-8:36:::
29	TGTGCCCCAGGAAGCCAAGGAAATCTCATCTTT	TRAV25		TRAJ42	TRAV25	TRAJ42	CAPGSQGNLIF	TGTGCCCCAGGAAGCCAAGGAAATCTCATCTTT	:::::::::0:-4:5:::::8:-10:33:::
30	TGTGCCCCAGTTGGAGGAAAGCTTATCTTC	TRAV12-2	TRDD3	TRAJ23	TRAV12	TRAJ23	CAPVGGKLIF	TGTGCCCCAGTTGGAGGAAAGCTTATCTTC	:::::::::0:-7:6:6:5:-13:11:12:-14:30:::
31	TGTGCCGCCAAATACATGTATTCAGGAGGAGGTGCTGACGGACTCACCTTT	TRAV12-2		TRAJ45	TRAV12	TRAJ45	CAAKYMYSGGGADGLTF	TGTGCCGCCAAATACATGTATTCAGGAGGAGGTGCTGACGGACTCACCTTT	:::::::::0:-6:7:::::10:6:51:::
32	TGTGCCGCCAAATACATGTATTCAGGAGGAGGTGCTGACGGACTCCTGTCT	TRAV12-2		TRAJ45	TRAV12	TRAJ45	CAAKYMYSGGGADGLLS	TGTGCCGCCAAATACATGTATTCAGGAGGAGGTGCTGACGGACTCCTGTCT	:::::::::0:-6:7:::::10:6:51:::
33	TGTGCCGCCAGTGCTTCCAAGATAATCTTT	TRAV12-2		TRAJ3	TRAV12	TRAJ3	CAASASKIIF	TGTGCCGCCAGTGCTTCCAAGATAATCTTT	:::::::::0:-6:7:::::8:-9:30:::
34	TGTGCCGCCGCAGACAGCACCCTCACCTTT	TRAV12-2		TRAJ11	TRAV12	TRAJ11	CAAADSTLTF	TGTGCCGCCGCAGACAGCACCCTCACCTTT	:::::::::0:-6:7:::::13:-12:30:::
35	TGTGCCGCCTCGATTAACACCGACAAGCTCATCTTT	TRAV12-2		TRAJ34	TRAV12	TRAJ34	CAASINTDKLIF	TGTGCCGCCTCGATTAACACCGACAAGCTCATCTTT	:::::::::0:-6:7:::::14:-5:36:::
36	TGTGCCGGCGGAGATGACAAGATCATCTTT	TRAV12-2		TRAJ30	TRAV12	TRAJ30	CAGGDDKIIF	TGTGCCGGCGGAGATGACAAGATCATCTTT	:::::::::0:-6:7:::::10:-6:30:::
37	TGTGCCGGGAACAATGCCAGACTCATGTTT	TRAV12-2		TRAJ31	TRAV12	TRAJ31	CAGNNARLMF	TGTGCCGGGAACAATGCCAGACTCATGTTT	:::::::::0:0:13:::::9:-5:30:::
38	TGTGCCGGTCCCGGCGACGGACTCACCTTT	TRAV12-2		TRAJ45	TRAV12	TRAJ45	CAGPGDGLTF	TGTGCCGGTCCCGGCGACGGACTCACCTTT	:::::::::0:-6:7:::::15:-20:30:::
39	TGTGCCGTAGGAGGAAGCTACATACCTACATTT	TRAV12-2		TRAJ6	TRAV12	TRAJ6	CAVGGSYIPTF	TGTGCCGTAGGAGGAAGCTACATACCTACATTT	:::::::::0:-5:8:::::8:-6:33:::
40	TGTGCCGTATCCAATGACAAGATCATCTTT	TRAV12-2		TRAJ30	TRAV12	TRAJ30	CAVSNDKIIF	TGTGCCGTATCCAATGACAAGATCATCTTT	:::::::::0:-5:8:::::13:-9:30:::
41	TGTGCCGTCTTTCCCAACACCAATGCAGGCAAATCAACCTTT	TRAV12-2		TRAJ27	TRAV12	TRAJ27	CAVFPNTNAGKSTF	TGTGCCGTCTTTCCCAACACCAATGCAGGCAAATCAACCTTT	:::::::::0:-5:8:::::15:-1:42:::
42	TGTGCCGTGAAAAATAACAATGTCAGACTCATGTTT	TRAV12-2		TRAJ31	TRAV12	TRAJ31	CAVKNNNVRLMF	TGTGCCGTGAAAAATAACAATGTCAGACTCATGTTT	:::::::::0:-2:11:::::12:-2:36:::
43	TGTGCCGTGAACAGTCGGTCTGACAGCTGGGGGAAATTGCAGTTT	TRAV12-2		TRAJ24	TRAV12	TRAJ24	CAVNSRSDSWGKLQF	TGTGCCGTGAACAGTCGGTCTGACAGCTGGGGGAAATTGCAGTTT	:::::::::0:0:13:::::19:-6:45:::
44	TGTGCCGTGAACGCTGACAAGATCATCTTT	TRAV12-2		TRAJ30	TRAV12	TRAJ30	CAVNADKIIF	TGTGCCGTGAACGCTGACAAGATCATCTTT	:::::::::0:-1:12:::::14:-10:30:::
45	TGTGCCGTGAACGGGGACAGCTTTCAGAAACTTGTATTT	TRAV12-2	TRDD3	TRAJ8	TRAV12	TRAJ8	CAVNGDSFQKLVF	TGTGCCGTGAACGGGGACAGCTTTCAGAAACTTGTATTT	:::::::::0:-1:12:12:-4:-4:17:19:-9:39:::
46	TGTGCCGTGACATCAGGATACAGCACCCTCACCTTT	TRAV12-2		TRAJ11	TRAV12	TRAJ11	CAVTSGYSTLTF	TGTGCCGTGACATCAGGATACAGCACCCTCACCTTT	:::::::::0:-3:10:::::12:-5:36:::
47	TGTGCCGTGACCAGTGGCTCTAGGTTGACCTTT	TRAV12-2		TRAJ58	TRAV12	TRAJ58	CAVTSGSRLTF	TGTGCCGTGACCAGTGGCTCTAGGTTGACCTTT	:::::::::0:-3:10:::::9:-8:33:::
48	TGTGCCGTGACCCCCCACGACAAGCTCATCTTT	TRAV12-2	TRDD3	TRAJ34	TRAV12	TRAJ34	CAVTPHDKLIF	TGTGCCGTGACCCCCCACGACAAGCTCATCTTT	:::::::::0:-3:10:11:8:-15:17:17:-11:33:::
49	TGTGCCGTGACCCTTCGTTCAGGAAACACACCTCTTGTCTTT	TRAV12-2	TRDD2	TRAJ29	TRAV12	TRAJ29	CAVTLRSGNTPLVF	TGTGCCGTGACCCTTCGTTCAGGAAACACACCTCTTGTCTTT	:::::::::0:-3:10:11:0:-4:16:17:-4:42:::
50	TGTGCCGTGACGCCAGGAACTACTCTGATCTTT	TRAV12-2		TRAJ15	TRAV12	TRAJ15	CAVTPGTTLIF	TGTGCCGTGACGCCAGGAACTACTCTGATCTTT	:::::::::0:-3:10:::::13:-9:33:::
51	TGTGCCGTGACGCCAGGAACTGCTCTGATCTTT	TRAV12-2		TRAJ15	TRAV12	TRAJ15	CAVTPGTALIF	TGTGCCGTGACGCCAGGAACTGCTCTGATCTTT	:::::::::0:-3:10:::::13:-9:33:::
52	TGTGCCGTGACGGGAACCTACAAATACATCTTT	TRAV12-2		TRAJ40	TRAV12	TRAJ40	CAVTGTYKYIF	TGTGCCGTGACGGGAACCTACAAATACATCTTT	:::::::::0:-3:10:::::12:-9:33:::
53	TGTGCCGTGACTAGAGCCAGACTCATGTTT	TRAV12-2		TRAJ31	TRAV12	TRAJ31	CAVTRARLMF	TGTGCCGTGACTAGAGCCAGACTCATGTTT	:::::::::0:-3:10:::::15:-11:30:::
54	TGTGCCGTGAGAGACAACTTCAACAAATTTTACTTT	TRAV8-1		TRAJ21	TRAV8	TRAJ21	CAVRDNFNKFYF	TGTGCCGTGAGAGACAACTTCAACAAATTTTACTTT	:::::::::0:-4:10:::::13:-1:36:::
55	TGTGCCGTGAGAGATGACAAGATCATCTTT	TRAV12-2		TRAJ30	TRAV12	TRAJ30	CAVRDDKIIF	TGTGCCGTGAGAGATGACAAGATCATCTTT	:::::::::0:-3:10:::::9:-5:30:::
56	TGTGCCGTGAGCCCTGGTGGCTACAATAAGCTGATTTTT	TRAV12-2		TRAJ4	TRAV12	TRAJ4	CAVSPGGYNKLIF	TGTGCCGTGAGCCCTGGTGGCTACAATAAGCTGATTTTT	:::::::::0:-3:10:::::13:-6:39:::
57	TGTGCCGTGAGCGGCGACAAGCTCATCTTT	TRAV12-2		TRAJ34	TRAV12	TRAJ34	CAVSGDKLIF	TGTGCCGTGAGCGGCGACAAGCTCATCTTT	:::::::::0:-3:10:::::14:-11:30:::
58	TGTGCCGTGAGTGCTTCCAAGATAATCTTT	TRAV12-2		TRAJ3	TRAV12	TRAJ3	CAVSASKIIF	TGTGCCGTGAGTGCTTCCAAGATAATCTTT	:::::::::0:-3:10:::::9:-10:30:::
59	TGTGCCGTGATAGGAGGAAAGCTTATCTTC	TRAV12-2		TRAJ23	TRAV12	TRAJ23	CAVIGGKLIF	TGTGCCGTGATAGGAGGAAAGCTTATCTTC	:::::::::0:-3:10:::::12:-14:30:::
60	TGTGCCGTGATCTCCGGCACTGCCAGTAAACTCACCTTT	TRAV12-2		TRAJ44	TRAV12	TRAJ44	CAVISGTASKLTF	TGTGCCGTGATCTCCGGCACTGCCAGTAAACTCACCTTT	:::::::::0:-3:10:::::13:-6:39:::
61	TGTGCCGTGGCGGATGACAAGATCATCTTT	TRAV12-2		TRAJ30	TRAV12	TRAJ30	CAVADDKIIF	TGTGCCGTGGCGGATGACAAGATCATCTTT	:::::::::0:-4:9:::::12:-8:30:::
62	TGTGCCGTGGGAGGCTTCAAAACTATCTTT	TRAV12-2		TRAJ9	TRAV12	TRAJ9	CAVGGFKTIF	TGTGCCGTGGGAGGCTTCAAAACTATCTTT	:::::::::0:-4:9:::::9:-9:30:::
63	TGTGCCGTGGGGGATGACAAGATCATCTTT	TRAV12-2		TRAJ30	TRAV12	TRAJ30	CAVGDDKIIF	TGTGCCGTGGGGGATGACAAGATCATCTTT	:::::::::0:-4:9:::::12:-8:30:::
64	TGTGCCGTGGTAGATGACAAGATCATCTTT	TRAV12-2		TRAJ30	TRAV12	TRAJ30	CAVVDDKIIF	TGTGCCGTGGTAGATGACAAGATCATCTTT	:::::::::0:-4:9:::::11:-7:30:::
65	TGTGCCGTGGTGGCAAGCAAACTAATCTTT	TRAV12-2		TRAJ37	TRAV12	TRAJ37	CAVVASKLIF	TGTGCCGTGGTGGCAAGCAAACTAATCTTT	:::::::::0:-4:9:::::16:-17:30:::
66	TGTGCCGTGTCAGATGACAAGATCATCTTT	TRAV12-2		TRAJ30	TRAV12	TRAJ30	CAVSDDKIIF	TGTGCCGTGTCAGATGACAAGATCATCTTT	:::::::::0:-4:9:::::11:-7:30:::
67	TGTGCCGTTAACAATGCCAGACTCATGTTT	TRAV12-2		TRAJ31	TRAV12	TRAJ31	CAVNNARLMF	TGTGCCGTTAACAATGCCAGACTCATGTTT	:::::::::0:0:13:::::8:-4:30:::
68	TGTGCCGTTGATGGTCAGAATTTTGTCTTT	TRAV12-2		TRAJ26	TRAV12	TRAJ26	CAVDGQNFVF	TGTGCCGTTGATGGTCAGAATTTTGTCTTT	:::::::::0:-5:8:::::10:-9:30:::
69	TGTGCCGTTTTCCCCGCTTTCCTCATCTTT	TRAV12-2	TRDD3	TRAJ34	TRAV12	TRAJ34	CAVFPAFLIF	TGTGCCGTTTTCCCCGCTTTCCTCATCTTT	:::::::::0:-5:8:10:9:-17:15:21:-18:30:::
70	TGTGCCTCCTCTAACGACTACAAGCTCAGCTTT	TRAV12-2		TRAJ20	TRAV12	TRAJ20	CASSNDYKLSF	TGTGCCTCCTCTAACGACTACAAGCTCAGCTTT	:::::::::0:-7:6:::::9:-2:33:::
71	TGTGCCTCCTCTAACGACTGCAAGCTCAGCTTT	TRAV12-2		TRAJ20	TRAV12	TRAJ20	CASSNDCKLSF	TGTGCCTCCTCTAACGACTGCAAGCTCAGCTTT	:::::::::0:-7:6:::::9:-2:33:::
72	TGTGCCTCTCCGAGTTCAGATGGCCAGAAGCTGCTCTTT	TRAV24		TRAJ16	TRAV24	TRAJ16	CASPSSDGQKLLF	TGTGCCTCTCCGAGTTCAGATGGCCAGAAGCTGCTCTTT	:::::::::0:-3:7:::::14:-4:39:::
73	TGTGCCTGGGGGGCTTCCAAGATAATCTTT	TRAV12-2	TRDD3	TRAJ3	TRAV12	TRAJ3	CAWGASKIIF	TGTGCCTGGGGGGCTTCCAAGATAATCTTT	:::::::::0:-7:6:6:-2:-5:12:12:-13:30:::
74	TGTGCCTGTGACACGTTAAACAGTGGGGATGCGACTGACGCCGATAAACTCATCTTT	TRDV2	TRDD3	TRDJ1	TRDV2	TRDJ1	CACDTLNSGDATDADKLIF	TGTGCCTGTGACACGTTAAACAGTGGGGATGCGACTGACGCCGATAAACTCATCTTT	:::::::::0:-1:14:24:-4:-3:30:40:-3:57:::
75	TGTGCCTGTGACACTCTCTCGTCGTTACTGGGGGATAAAGGTACCGATAAACTCATCTTT	TRDV2	TRDD3	TRDJ1	TRDV2	TRDJ1	CACDTLSSLLGDKGTDKLIF	TGTGCCTGTGACACTCTCTCGTCGTTACTGGGGGATAAAGGTACCGATAAACTCATCTTT	:::::::::0:-1:14:25:1:-2:37:42:-2:60:::
76	TGTGCCTGTGACGCGTTAAACAGTGGGGATGCGACTGACGCCGATAAACTCATCTTT	TRDV2	TRDD3	TRDJ1	TRDV2	TRDJ1	CACDALNSGDATDADKLIF	TGTGCCTGTGACGCGTTAAACAGTGGGGATGCGACTGACGCCGATAAACTCATCTTT	:::::::::0:-3:12:24:-4:-3:30:40:-3:57:::
77	TGTGCCTGTGACGCGTTAAACAGTGGGGATGCGACTGACGCCGATAAACTCCTCTTT	TRDV2	TRDD3	TRDJ1	TRDV2	TRDJ1	CACDALNSGDATDADKLLF	TGTGCCTGTGACGCGTTAAACAGTGGGGATGCGACTGACGCCGATAAACTCCTCTTT	:::::::::0:-3:12:24:-4:-3:30:40:-3:57:::
78	TGTGCCTGTGACTCGGTACTGGGGGAAGGGTACACCGATAAACTCATCTTT	TRDV2	TRDD3	TRDJ1	TRDV2	TRDJ1	CACDSVLGEGYTDKLIF	TGTGCCTGTGACTCGGTACTGGGGGAAGGGTACACCGATAAACTCATCTTT	:::::::::0:-3:12:15:2:-4:26:29:2:51:::
79	TGTGCCTTCGAGGGGGGAAAGCTTATCTTC	TRAV12-2		TRAJ23	TRAV12	TRAJ23	CAFEGGKLIF	TGTGCCTTCGAGGGGGGAAAGCTTATCTTC	:::::::::0:-7:6:::::10:-12:30:::
80	TGTGCCTTGAGCGGCGACAAGCTCATCTTT	TRAV12-3		TRAJ34	TRAV12	TRAJ34	CALSGDKLIF	TGTGCCTTGAGCGGCGACAAGCTCATCTTT	:::::::::0:0:13:::::14:-11:30:::
81	TGTGCCTTTGAGGGAGGAAAGCTTATCTTC	TRAV12-2		TRAJ23	TRAV12	TRAJ23	CAFEGGKLIF	TGTGCCTTTGAGGGAGGAAAGCTTATCTTC	:::::::::0:-7:6:::::10:-12:30:::
82	TGTGCCTTTGAGGGGGGAAAGCTTATCTTC	TRAV12-2		TRAJ23	TRAV12	TRAJ23	CAFEGGKLIF	TGTGCCTTTGAGGGGGGAAAGCTTATCTTC	:::::::::0:-7:6:::::10:-12:30:::
83	TGTGCGTCGTCTGGGGGTTACCAGAAAGTTACCTTT	TRAV20		TRAJ13	TRAV20	TRAJ13	CASSGGYQKVTF	TGTGCGTCGTCTGGGGGTTACCAGAAAGTTACCTTT	:::::::::0:-8:5:::::9:-5:36:::
84	TGTGCTCTAAGTGGCGGTCGGGCTGGCAACAACCGTAAGCTGATTTGG	TRAV16		TRAJ38	TRAV16	TRAJ38	CALSGGRAGNNRKLIW	TGTGCTCTAAGTGGCGGTCGGGCTGGCAACAACCGTAAGCTGATTTGG	:::::::::0:1:15:::::21:-4:48:::
85	TGTGCTCTACTAGCAAATTCCGGGTATGCACTCAACCTC	TRAV6		TRAJ41	TRAV6	TRAJ41	CALLANSGYALNL	TGTGCTCTACTAGCAAATTCCGGGTATGCACTCAACCTC	:::::::::0:-4:9:::::13:-5:39:::
86	TGTGCTCTACTAGCAAATTCCGGGTATGCACTCAACTTC	TRAV6		TRAJ41	TRAV6	TRAJ41	CALLANSGYALNF	TGTGCTCTACTAGCAAATTCCGGGTATGCACTCAACTTC	:::::::::0:-4:9:::::13:-5:39:::
87	TGTGCTCTAGCCCTGAACACAGGCTTTCAGAAACTTGTATTT	TRAV6		TRAJ8	TRAV6	TRAJ8	CALALNTGFQKLVF	TGTGCTCTAGCCCTGAACACAGGCTTTCAGAAACTTGTATTT	:::::::::0:-3:10:::::13:0:42:::
88	TGTGCTCTCGCGAATTCTGGGGGTTACCAGAAAGTTACCTTT	TRAV9-2		TRAJ13	TRAV9	TRAJ13	CALANSGGYQKVTF	TGTGCTCTCGCGAATTCTGGGGGTTACCAGAAAGTTACCTTT	:::::::::0:-6:8:::::11:-1:42:::
89	TGTGCTCTGAGCACCGTTTCAGGAAACACACCTCTTGTCTTT	TRAV9-2		TRAJ29	TRAV9	TRAJ29	CALSTVSGNTPLVF	TGTGCTCTGAGCACCGTTTCAGGAAACACACCTCTTGTCTTT	:::::::::0:-3:11:::::17:-4:42:::
90	TGTGCTCTGAGCGATGCGGGGGCGAGAGGAGGTGCTGACGGACTCACCTTT	TRAV9-2	TRDD3	TRAJ45	TRAV9	TRAJ45	CALSDAGARGGADGLTF	TGTGCTCTGAGCGATGCGGGGGCGAGAGGAGGTGCTGACGGACTCACCTTT	:::::::::0:1:15:17:-3:-5:22:25:-9:51:::
91	TGTGCTCTGAGTGTAAAAGGAGGAAGCCAAGGAAATCTCATCTTT	TRAV9-2		TRAJ42	TRAV9	TRAJ42	CALSVKGGSQGNLIF	TGTGCTCTGAGTGTAAAAGGAGGAAGCCAAGGAAATCTCATCTTT	:::::::::0:-1:13:::::18:-8:45:::
92	TGTGCTCTTGGGGATCTCTACTGGCATCCTAAAGACTGGGGGATACTGGGCGGCGATAAACTCATCTTT	TRDV1	TRDD3	TRDJ1	TRDV1	TRDJ1	CALGDLYWHPKDWGILGGDKLIF	TGTGCTCTTGGGGATCTCTACTGGCATCCTAAAGACTGGGGGATACTGGGCGGCGATAAACTCATCTTT	:::::::::0:-3:14:34:0:-1:46:53:-4:69:::
93	TGTGCTGGCGCAACTGACAGCTGGGGGAAATTGCAGTTT	TRAV2		TRAJ24	TRAV2	TRAJ24	CAGATDSWGKLQF	TGTGCTGGCGCAACTGACAGCTGGGGGAAATTGCAGTTT	:::::::::0:-7:7:::::10:-3:39:::
94	TGTGCTGTGAAAGATGGGGGAGGTGCTACAAACAAGCTCATCTTT	TRAV1-2	TRDD3	TRAJ32	TRAV1	TRAJ32	CAVKDGGGATNKLIF	TGTGCTGTGAAAGATGGGGGAGGTGCTACAAACAAGCTCATCTTT	:::::::::0:1:15:15:-3:-4:21:21:-11:45:::
95	TGTGCTGTGAAAGGATACAGCACCCTCACCTTT	TRAV21		TRAJ11	TRAV21	TRAJ11	CAVKGYSTLTF	TGTGCTGTGAAAGGATACAGCACCCTCACCTTT	:::::::::0:-2:10:::::11:-7:33:::
96	TGTGCTGTGACCAAGGATTCTGCAAGGCAACTGACCTTT	TRAV3		TRAJ22	TRAV3	TRAJ22	CAVTKDSARQLTF	TGTGCTGTGACCAAGGATTCTGCAAGGCAACTGACCTTT	:::::::::0:-6:10:::::17:-10:39:::
97	TGTGCTGTGAGAGACACGGATAACTATGGTCAGAATTTTGTCTTT	TRAV3		TRAJ26	TRAV3	TRAJ26	CAVRDTDNYGQNFVF	TGTGCTGTGAGAGACACGGATAACTATGGTCAGAATTTTGTCTTT	:::::::::0:0:16:::::17:-1:45:::
98	TGTGCTGTGAGAGACCGGGGAGCCAGACTCATGTTT	TRAV3	TRDD3	TRAJ31	TRAV3	TRAJ31	CAVRDRGARLMF	TGTGCTGTGAGAGACCGGGGAGCCAGACTCATGTTT	:::::::::0:-1:15:16:-4:-4:21:21:-11:36:::
99	TGTGCTGTGAGAGACGGGGATAGCAACTATCAGTTAATCTGG	TRAV3		TRAJ33	TRAV3	TRAJ33	CAVRDGDSNYQLIW	TGTGCTGTGAGAGACGGGGATAGCAACTATCAGTTAATCTGG	:::::::::0:-1:15:::::17:-1:42:::
100	TGTGCTGTGAGAGCTGGCCGGAATAACAATGCCAGACTCATGTTT	TRAV3		TRAJ31	TRAV3	TRAJ31	CAVRAGRNNNARLMF	TGTGCTGTGAGAGCTGGCCGGAATAACAATGCCAGACTCATGTTT	:::::::::0:-3:13:::::17:2:45:::
101	TGTGCTGTGAGAGCTGGCCGGAATAACAATGCCAGATTCATGTTT	TRAV3		TRAJ31	TRAV3	TRAJ31	CAVRAGRNNNARFMF	TGTGCTGTGAGAGCTGGCCGGAATAACAATGCCAGATTCATGTTT	:::::::::0:-3:13:::::17:2:45:::
102	TGTGCTGTGAGAGGACCTTCTGGGGGTTACCAGAAAGTTACCTTT	TRAV3		TRAJ13	TRAV3	TRAJ13	CAVRGPSGGYQKVTF	TGTGCTGTGAGAGGACCTTCTGGGGGTTACCAGAAAGTTACCTTT	:::::::::0:-3:13:::::17:-4:45:::
103	TGTGCTGTGAGGGGTGGGGGAGGTAGCAACTATAAACTGACATTT	TRAV22		TRAJ53	TRAV22	TRAJ53	CAVRGGGGSNYKLTF	TGTGCTGTGAGGGGTGGGGGAGGTAGCAACTATAAACTGACATTT	:::::::::0:-4:9:::::18:-8:45:::
104	TGTGCTGTGAGTGATAGCTTGAACAGAGATGACAAGATCATCTTT	TRAV8-6		TRAJ30	TRAV8	TRAJ30	CAVSDSLNRDDKIIF	TGTGCTGTGAGTGATAGCTTGAACAGAGATGACAAGATCATCTTT	:::::::::0:1:15:::::19:0:45:::
105	TGTGCTGTGAGTGATCTAGGCAATGACATGCGCTTT	TRAV8-4		TRAJ43	TRAV8	TRAJ43	CAVSDLGNDMRF	TGTGCTGTGAGTGATCTAGGCAATGACATGCGCTTT	:::::::::0:2:16:::::20:-7:36:::
106	TGTGCTGTGAGTGTTCTATCAGGAGGAAGCTACATACCTACATTT	TRAV8-4		TRAJ6	TRAV8	TRAJ6	CAVSVLSGGSYIPTF	TGTGCTGTGAGTGTTCTATCAGGAGGAAGCTACATACCTACATTT	:::::::::0:-1:13:::::17:-3:45:::
107	TGTGCTGTGGATTCGAGGTATGGAGGAAGCCAAGGAAATCTCATCTTT	TRAV21	TRDD1	TRAJ42	TRAV21	TRAJ42	CAVDSRYGGSQGNLIF	TGTGCTGTGGATTCGAGGTATGGAGGAAGCCAAGGAAATCTCATCTTT	:::::::::0:-3:9:11:3:-6:16:18:-5:48:::
108	TGTGCTGTGGGGGACTTCAACAAATTTTACTTT	TRAV2		TRAJ21	TRAV2	TRAJ21	CAVGDFNKFYF	TGTGCTGTGGGGGACTTCAACAAATTTTACTTT	:::::::::0:0:14:::::13:-4:33:::
109	TGTGCTGTGGGTGACGATTATGGAGGAAGCCAAGGAAATCTCATCTTT	TRAV8-3		TRAJ42	TRAV8	TRAJ42	CAVGDDYGGSQGNLIF	TGTGCTGTGGGTGACGATTATGGAGGAAGCCAAGGAAATCTCATCTTT	:::::::::0:-1:13:::::16:-3:48:::
110	TGTGCTGTGGGTGCGGCTTCTGGTGGCTACAATAAGCTGATTTTT	TRAV8-3		TRAJ4	TRAV8	TRAJ4	CAVGAASGGYNKLIF	TGTGCTGTGGGTGCGGCTTCTGGTGGCTACAATAAGCTGATTTTT	:::::::::0:1:15:::::17:-4:45:::
111	TGTGCTTATAGAAGGCTATACAACTTCAACAAATTTTACTTT	TRAV38-2DV8	TRDD2	TRAJ21	TRAV38	TRAJ21	CAYRRLYNFNKFYF	TGTGCTTATAGAAGGCTATACAACTTCAACAAATTTTACTTT	:::::::::0:-5:11:11:4:-8:16:16:2:42:::
112	TGTGCTTATAGGAGCGAACGAGGAAGCCAAGGAAATCTCATCTTT	TRAV38-2DV8		TRAJ42	TRAV38	TRAJ42	CAYRSERGSQGNLIF	TGTGCTTATAGGAGCGAACGAGGAAGCCAAGGAAATCTCATCTTT	:::::::::0:0:16:::::19:-9:45:::
113	TGTGCTTATTCGCGGCGTCGGGGGAAGCTGACATTT	TRAV38-2DV8	TRDD3	TRAJ52	TRAV38	TRAJ52	CAYSRRRGKLTF	TGTGCTTATTCGCGGCGTCGGGGGAAGCTGACATTT	:::::::::0:-7:9:19:-3:-5:24:24:-26:36:::
114	TGTGCTTTCGGGGCGGGCAGAGATGACAAGATCATCTTT	TRAV38-1		TRAJ30	TRAV38	TRAJ30	CAFGAGRDDKIIF	TGTGCTTTCGGGGCGGGCAGAGATGACAAGATCATCTTT	:::::::::0:-8:9:::::17:-4:39:::
115	TGTGCTTTCTCAAAAGCTGCAGGCAACAAGCTAACTTTT	TRAV38-2DV8		TRAJ17	TRAV38	TRAJ17	CAFSKAAGNKLTF	TGTGCTTTCTCAAAAGCTGCAGGCAACAAGCTAACTTTT	:::::::::0:-9:7:::::12:-5:39:::
116	TGTGGCGGGGGGAACTATGGTCAGAATTTTGTCTTT	TRAV12-2	TRDD3	TRAJ26	TRAV12	TRAJ26	CGGGNYGQNFVF	TGTGGCGGGGGGAACTATGGTCAGAATTTTGTCTTT	:::::::::0:-9:4:6:-3:-5:11:12:-5:36:::
117	TGTGTCTCCTCTAACGACTACAAGCTCAGCTTT	TRAV12-2		TRAJ20	TRAV12	TRAJ20	CVSSNDYKLSF	TGTGTCTCCTCTAACGACTACAAGCTCAGCTTT	:::::::::0:-9:4:::::9:-2:33:::
118	TGTGTGGTGAACAGGGACAGCTATAAATTGATCTTC	TRAV12-1		TRAJ12	TRAV12	TRAJ12	CVVNRDSYKLIF	TGTGTGGTGAACAGGGACAGCTATAAATTGATCTTC	:::::::::0:0:13:::::17:-10:36:::
119	TGTGTGGTGAACCAGGCAGGAACTGCTCTGATCTTT	TRAV12-1		TRAJ15	TRAV12	TRAJ15	CVVNQAGTALIF	TGTGTGGTGAACCAGGCAGGAACTGCTCTGATCTTT	:::::::::0:-1:12:::::9:-2:36:::
120	TGTGTGGTGAACGACTACAAGCTCAGCTTT	TRAV12-1		TRAJ20	TRAV12	TRAJ20	CVVNDYKLSF	TGTGTGGTGAACGACTACAAGCTCAGCTTT	:::::::::0:-1:12:::::9:-5:30:::
121	TGTGTGGTGACGGGGGGAAAGCTTATCTTC	TRAV12-1		TRAJ23	TRAV12	TRAJ23	CVVTGGKLIF	TGTGTGGTGACGGGGGGAAAGCTTATCTTC	:::::::::0:-3:10:::::11:-13:30:::
122	TGTGTGGTGAGCTACGACAAGCTCATCTTT	TRAV12-1		TRAJ34	TRAV12	TRAJ34	CVVSYDKLIF	TGTGTGGTGAGCTACGACAAGCTCATCTTT	:::::::::0:-3:10:::::14:-11:30:::
123	TGTGTGGTGGGAGATGACAAGATCATCTTT	TRAV12-1		TRAJ30	TRAV12	TRAJ30	CVVGDDKIIF	TGTGTGGTGGGAGATGACAAGATCATCTTT	:::::::::0:-4:9:::::10:-6:30:::
124	TGTGTGGTGGGTGATGACAAGATCATCTTT	TRAV12-1		TRAJ30	TRAV12	TRAJ30	CVVGDDKIIF	TGTGTGGTGGGTGATGACAAGATCATCTTT	:::::::::0:-4:9:::::12:-8:30:::
125	TGTGTGGTTACGGGGGGAAAGCTTATCTTC	TRAV12-1		TRAJ23	TRAV12	TRAJ23	CVVTGGKLIF	TGTGTGGTTACGGGGGGAAAGCTTATCTTC	:::::::::0:-5:8:::::11:-13:30:::
126	TGTGTGGTTTCCTCAGGAACCTACAAATACATCTTT	TRAV12-1		TRAJ40	TRAV12	TRAJ40	CVVSSGTYKYIF	TGTGTGGTTTCCTCAGGAACCTACAAATACATCTTT	:::::::::0:-5:8:::::10:-4:36:::
127	TGTGTTGTGAGCCTCATGAACACAGGCTTTCAGAAACTTGTATTT	TRAV8-2		TRAJ8	TRAV8	TRAJ8	CVVSLMNTGFQKLVF	TGTGTTGTGAGCCTCATGAACACAGGCTTTCAGAAACTTGTATTT	:::::::::0:-3:11:::::13:3:45:::
128	TGTGTTGTGAGTGAGGAAAACAACTTCAACAAATTTTACTTT	TRAV8-2		TRAJ21	TRAV8	TRAJ21	CVVSEENNFNKFYF	TGTGTTGTGAGTGAGGAAAACAACTTCAACAAATTTTACTTT	:::::::::0:0:14:::::19:-1:42:::
129	TGTGTTGTGAGTGATCTAGGCAATGACATGCGCTTT	TRAV8-4		TRAJ43	TRAV8	TRAJ43	CVVSDLGNDMRF	TGTGTTGTGAGTGATCTAGGCAATGACATGCGCTTT	:::::::::0:2:16:::::20:-7:36:::
130	TGTTCGAATTCTGGGGGTTACCAGAAAGTTACCTTT	TRAV5		TRAJ13	TRAV5	TRAJ13	CSNSGGYQKVTF	TGTTCGAATTCTGGGGGTTACCAGAAAGTTACCTTT	:::::::::0:-10:3:::::5:-1:36:::

## Sheet: NS4B+ TCRbeta donor M1
	CDR3.nucleotide.sequence	bestVGene	bestDGene	bestJGene	bestVFamily	bestJFamily	CDR3.amino.acid.sequence	nSeqCDR3	refPoints
1	AGCGCCAGCAGCCCAGGGGCGGGGGCCGCCTACGAGCAGTACTTC	TRBV4-3	TRBD1	TRBJ2-7	TRBV4	TRBJ2	SASSPGAGAAYEQYF	AGCGCCAGCAGCCCAGGGGCGGGGGCCGCCTACGAGCAGTACTTC	:::::::::0:-4:13:13:-4:-2:19:28:-2:45:::
2	AGTGCCAGCAGTGCCTCCGTATTTGGGAGCTATGGCTACACCTTC	TRBV2	TRBD2	TRBJ1-2	TRBV2	TRBJ1	SASSASVFGSYGYTF	AGTGCCAGCAGTGCCTCCGTATTTGGGAGCTATGGCTACACCTTC	:::::::::0:-4:13:13:15:-26:18:29:-4:45:::
3	TGCACCAGCAGCCCTACATCATACTGGAATGAAAAACTGTTTTTT	TRBV1		TRBJ1-4	TRBV1*00	TRBJ1	CTSSPTSYWNEKLFF	TGCACCAGCAGCCCTACATCATACTGGAATGAAAAACTGTTTTTT	:::::::::0::13:::::27::45:::
4	TGCAGCATATCGGACAGGGGGCTCACCGGGGAGCTGTTTTTT	TRBV29-1	TRBD1	TRBJ2-2	TRBV29	TRBJ2	CSISDRGLTGELFF	TGCAGCATATCGGACAGGGGGCTCACCGGGGAGCTGTTTTTT	:::::::::0::6:11::22:22:23::42:::
5	TGCAGCGCCCCACTAGCGGGGGGAGGGAATGAGCAGTTCTTC	TRBV29-1	TRBD2	TRBJ2-1	TRBV29	TRBJ2	CSAPLAGGGNEQFF	TGCAGCGCCCCACTAGCGGGGGGAGGGAATGAGCAGTTCTTC	:::::::::0::7:11::23:23:27::42:::
6	TGCAGCGCCGCCCTAGCGGGGGGTCCCAATGAGCAGTTCTTC	TRBV29-1	TRBD2	TRBJ2-1	TRBV29	TRBJ2	CSAALAGGPNEQFF	TGCAGCGCCGCCCTAGCGGGGGGTCCCAATGAGCAGTTCTTC	:::::::::0:-7:7:12:-4:-4:20:26:-6:42:::
7	TGCAGCGCTACCGGGAAAAAGGGCACAGATACGCAGTATTTT	TRBV20-1	TRBD1	TRBJ2-3	TRBV20	TRBJ2	CSATGKKGTDTQYF	TGCAGCGCTACCGGGAAAAAGGGCACAGATACGCAGTATTTT	:::::::::0:-4:10:10:2:-8:16:22:-1:42:::
8	TGCAGCGCTACCGGGAAAAGGGGCACAGATACGCAGTATTTT	TRBV20-1	TRBD1	TRBJ2-3	TRBV20	TRBJ2	CSATGKRGTDTQYF	TGCAGCGCTACCGGGAAAAGGGGCACAGATACGCAGTATTTT	:::::::::0:-4:10:10:2:-8:16:22:-1:42:::
9	TGCAGCGTCCCACTAGCGGGGGGTTGGAATGAGCAGTTCTTC	TRBV29-1	TRBD2	TRBJ2-1	TRBV29	TRBJ2	CSVPLAGGWNEQFF	TGCAGCGTCCCACTAGCGGGGGGTTGGAATGAGCAGTTCTTC	:::::::::0:-6:8:11:-3:-4:20:27:-7:42:::
10	TGCAGCGTCCCCCTGGGCGGTGGAGCCAATGAGCAGTTCTTC	TRBV29-1	TRBD1	TRBJ2-1	TRBV29	TRBJ2	CSVPLGGGANEQFF	TGCAGCGTCCCCCTGGGCGGTGGAGCCAATGAGCAGTTCTTC	:::::::::0::8:8:::15:26::42:::
11	TGCAGCGTCCCTCTAAGCGGGGGGGGTAATGAGCAGTTCTTC	TRBV29-1	TRBD2	TRBJ2-1	TRBV29	TRBJ2	CSVPLSGGGNEQFF	TGCAGCGTCCCTCTAAGCGGGGGGGGTAATGAGCAGTTCTTC	:::::::::0:-6:8:15:-6:0:25:27:-7:42:::
12	TGCAGCGTGCACCTCTCCGGCGCACCCTTAACGCCTGAAGCTTTCTTT	TRBV29-1	TRBD1	TRBJ1-1	TRBV29	TRBJ1	CSVHLSGAPLTPEAFF	TGCAGCGTGCACCTCTCCGGCGCACCCTTAACGCCTGAAGCTTTCTTT	:::::::::0:-6:8:18:-9:7:28:34:-6:48:::
13	TGCAGCGTTGAAAATGACAGCACCGGGGAGCTGTTTTTT	TRBV29-1	TRBD1	TRBJ2-2	TRBV29	TRBJ2	CSVENDSTGELFF	TGCAGCGTTGAAAATGACAGCACCGGGGAGCTGTTTTTT	:::::::::0:-2:12:15:-2:-5:20:20:-4:39:::
14	TGCAGCGTTGAAGATTTTCCCACTGAAGCTTTCTTT	TRBV29-1		TRBJ1-1	TRBV29	TRBJ1	CSVEDFPTEAFF	TGCAGCGTTGAAGATTTTCCCACTGAAGCTTTCTTT	:::::::::0:14:19:::::20::36:::
15	TGCAGCGTTGACAGGAGGTCTGATGAAGCTTTCTTT	TRBV29-1	TRBD2	TRBJ1-1	TRBV29	TRBJ1	CSVDRRSDEAFF	TGCAGCGTTGACAGGAGGTCTGATGAAGCTTTCTTT	:::::::::0::11:13:::18:23::36:::
16	TGCAGCGTTGATCACAGGGGGCTCCGCGAGAAAGAGACCCAGTACTTC	TRBV29-1	TRBD1	TRBJ2-5	TRBV29	TRBJ2	CSVDHRGLREKETQYF	TGCAGCGTTGATCACAGGGGGCTCCGCGAGAAAGAGACCCAGTACTTC	:::::::::0:-3:11:13:-3:0:22:31:-3:48:::
17	TGCAGCGTTGGGGGACATCTGAGGGGCACAGATACGCAGTATTTT	TRBV29-1	TRBD1	TRBJ2-3	TRBV29	TRBJ2	CSVGGHLRGTDTQYF	TGCAGCGTTGGGGGACATCTGAGGGGCACAGATACGCAGTATTTT	:::::::::0:-4:10:11:0:-6:17:25:-1:45:::
18	TGCAGTGCCCCGTCCGGAAGGGGCCTTAATGAGCAGTTCTTC	TRBV20-1	TRBD2	TRBJ2-1	TRBV20	TRBJ2	CSAPSGRGLNEQFF	TGCAGTGCCCCGTCCGGAAGGGGCCTTAATGAGCAGTTCTTC	:::::::::0:-6:8:14:-8:4:26:27:-7:42:::
19	TGCAGTGCCCCGTCCGGAGGGGGCCTTAATGAGCAGTTCTTC	TRBV20-1	TRBD1	TRBJ2-1	TRBV20	TRBJ2	CSAPSGGGLNEQFF	TGCAGTGCCCCGTCCGGAGGGGGCCTTAATGAGCAGTTCTTC	:::::::::0::8:17::24:24:27::42:::
20	TGCAGTGCCGTCCTTCCGGGACTAGCGGGTTACAATGAGCAGTTCTTC	TRBV20-1	TRBD2	TRBJ2-1	TRBV20	TRBJ2	CSAVLPGLAGYNEQFF	TGCAGTGCCGTCCTTCCGGGACTAGCGGGTTACAATGAGCAGTTCTTC	:::::::::0::8:15:17::29:30::48:::
21	TGCAGTGCCTTAGGAGCCCATTTAAATGAAAAACTGTTTTTT	TRBV20-1		TRBJ1-4	TRBV20	TRBJ1	CSALGAHLNEKLFF	TGCAGTGCCTTAGGAGCCCATTTAAATGAAAAACTGTTTTTT	:::::::::0::8:::::24::42:::
22	TGCAGTGCTACCGGGGCGCGATCCACAGATACGCAGTATTTT	TRBV20-1	TRBD1	TRBJ2-3	TRBV20	TRBJ2	CSATGARSTDTQYF	TGCAGTGCTACCGGGGCGCGATCCACAGATACGCAGTATTTT	:::::::::0:-4:10:12:-7:2:19:23:-2:42:::
23	TGCAGTGCTACGGACACCTACGAGCAGTACTTC	TRBV20-1	TRBD1	TRBJ2-7	TRBV20	TRBJ2	CSATDTYEQYF	TGCAGTGCTACGGACACCTACGAGCAGTACTTC	:::::::::0:-4:10:11:-1:-6:16:16:-2:33:::
24	TGCAGTGCTAGAGATTGGAGGGTCGCGGGGGGGCCCGTCGAGCAGTACGTC	TRBV20-1	TRBD2	TRBJ2-7	TRBV20	TRBJ2	CSARDWRVAGGPVEQYV	TGCAGTGCTAGAGATTGGAGGGTCGCGGGGGGGCCCGTCGAGCAGTACGTC	:::::::::0:1:15:24:-7:3:36:38:-6:51:::
25	TGCAGTGCTAGAGATTTAGAGGGGACCTACGAGCAGTACGTC	TRBV20-1	TRBD1	TRBJ2-7	TRBV20	TRBJ2	CSARDLEGTYEQYV	TGCAGTGCTAGAGATTTAGAGGGGACCTACGAGCAGTACGTC	:::::::::0:14:15:19:::24:25::42:::
26	TGCAGTGCTAGCCAGGCCGCGGCCTACGAGCAGTACTTC	TRBV20-1		TRBJ2-7	TRBV20	TRBJ2	CSASQAAAYEQYF	TGCAGTGCTAGCCAGGCCGCGGCCTACGAGCAGTACTTC	:::::::::0::11:::::22::39:::
27	TGCAGTGCTAGCCCTAGAGGAGTGAACACTGAAGCTTTCTTT	TRBV20-1		TRBJ1-1	TRBV20	TRBJ1	CSASPRGVNTEAFF	TGCAGTGCTAGCCCTAGAGGAGTGAACACTGAAGCTTTCTTT	:::::::::0::11:::::22:22:42:::
28	TGCAGTGCTAGCGGACTAAGGGGCGCAGATACGCAGTATTTT	TRBV20-1	TRBD1	TRBJ2-3	TRBV20	TRBJ2	CSASGLRGADTQYF	TGCAGTGCTAGCGGACTAAGGGGCGCAGATACGCAGTATTTT	:::::::::0:-3:11:19:-7:1:25:25:-4:42:::
29	TGCAGTGCTATCGGGCAGCGGGGCGCAGATACGCAGTATTTC	TRBV20-1	TRBD1	TRBJ2-3	TRBV20	TRBJ2	CSAIGQRGADTQYF	TGCAGTGCTATCGGGCAGCGGGGCGCAGATACGCAGTATTTC	:::::::::0:-4:10:19:-7:1:25:25:-4:42:::
30	TGCAGTGCTATCGGGCAGCGGGGCGCAGATACGCAGTATTTT	TRBV20-1	TRBD1	TRBJ2-3	TRBV20	TRBJ2	CSAIGQRGADTQYF	TGCAGTGCTATCGGGCAGCGGGGCGCAGATACGCAGTATTTT	:::::::::0:-4:10:19:-7:1:25:25:-4:42:::
31	TGCAGTGCTCCCACTAGCGGGGGTCACAATGAGCAGTTCTTC	TRBV20-1	TRBD2	TRBJ2-1	TRBV20	TRBJ2	CSAPTSGGHNEQFF	TGCAGTGCTCCCACTAGCGGGGGTCACAATGAGCAGTTCTTC	:::::::::0::9:12:::21:25::42:::
32	TGCAGTGCTCCGACTAGCGGGGGGGCTAATGAGCAGTTCTTC	TRBV20-1	TRBD2	TRBJ2-1	TRBV20	TRBJ2	CSAPTSGGANEQFF	TGCAGTGCTCCGACTAGCGGGGGGGCTAATGAGCAGTTCTTC	:::::::::0::9:11::25:26:27::42:::
33	TGCAGTGCTCCGACTGGCGGGGGGTCCAACGAGCAGTACTTC	TRBV20-1	TRBD2	TRBJ2-7	TRBV20	TRBJ2	CSAPTGGGSNEQYF	TGCAGTGCTCCGACTGGCGGGGGGTCCAACGAGCAGTACTTC	:::::::::0::9:11::24:24:24::42:::
34	TGCAGTGCTGGGGACAGTGTGAATGAGCAGTTCTTC	TRBV20-1	TRBD1	TRBJ2-1	TRBV20	TRBJ2	CSAGDSVNEQFF	TGCAGTGCTGGGGACAGTGTGAATGAGCAGTTCTTC	:::::::::0::9:10:10::17:21::36:::
35	TGCAGTGCTTCAACTACCCCGGGGTTCTCAGATACGCAGTATTTT	TRBV20-1	TRBD1	TRBJ2-3	TRBV20	TRBJ2	CSASTTPGFSDTQYF	TGCAGTGCTTCAACTACCCCGGGGTTCTCAGATACGCAGTATTTT	:::::::::0:-5:9:17:3:-9:23:28:-4:45:::
36	TGCAGTGTCCCGACTAGCGGGGGCTACAACGAGCAGTTCTTC	TRBV20-1	TRBD2	TRBJ2-1	TRBV20	TRBJ2	CSVPTSGGYNEQFF	TGCAGTGTCCCGACTAGCGGGGGCTACAACGAGCAGTTCTTC	:::::::::0:-7:7:11:-2:-4:21:23:-3:42:::
37	TGCAGTGTCCCGACTAGCGGGGGCTACAATAAGCAGTTCTTC	TRBV20-1	TRBD2	TRBJ2-1	TRBV20	TRBJ2	CSVPTSGGYNKQFF	TGCAGTGTCCCGACTAGCGGGGGCTACAATAAGCAGTTCTTC	:::::::::0:-7:7:11:-2:-4:21:23:-3:42:::
38	TGCAGTGTCCCGACTAGCGGGGGCTACAATGAGCAGTTCTTC	TRBV20-1	TRBD2	TRBJ2-1	TRBV20	TRBJ2	CSVPTSGGYNEQFF	TGCAGTGTCCCGACTAGCGGGGGCTACAATGAGCAGTTCTTC	:::::::::0::7:11:::21:23::42:::
39	TGCAGTGTTCCGACTAGCGGGGGGGAAAACATTCAGTACTTC	TRBV20-1	TRBD2	TRBJ2-4	TRBV20	TRBJ2	CSVPTSGGENIQYF	TGCAGTGTTCCGACTAGCGGGGGGGAAAACATTCAGTACTTC	:::::::::0::7:11::25:25:25::42:::
40	TGCAGTGTTCCGACTAGCGGGGGGGAGAACATTCAGTACTTC	TRBV20-1	TRBD2	TRBJ2-4	TRBV20	TRBJ2	CSVPTSGGENIQYF	TGCAGTGTTCCGACTAGCGGGGGGGAGAACATTCAGTACTTC	:::::::::0:-7:7:11:-2:0:25:27:-7:42:::
41	TGCCGTGCCGTCCTTCCGGGACTAGCGGGTTACAATGAGCAGTTCTTC	TRBV20-1	TRBD2	TRBJ2-1	TRBV20	TRBJ2	CRAVLPGLAGYNEQFF	TGCCGTGCCGTCCTTCCGGGACTAGCGGGTTACAATGAGCAGTTCTTC	:::::::::0:-6:8:15:2:-4:29:30:-4:48:::
42	TGCGCCAGCAACCAAGCGGGAGCAGCCTACGAGCAGTACTTC	TRBV5-1	TRBD2	TRBJ2-7	TRBV5	TRBJ2	CASNQAGAAYEQYF	TGCGCCAGCAACCAAGCGGGAGCAGCCTACGAGCAGTACTTC	:::::::::0:-6:10:14:-6:-2:22:25:-2:42:::
43	TGCGCCAGCAAGTACAGGGGGCGCTTAGATACGCAGTATTTT	TRBV10-1	TRBD1	TRBJ2-3	TRBV10	TRBJ2	CASKYRGRLDTQYF	TGCGCCAGCAAGTACAGGGGGCGCTTAGATACGCAGTATTTT	:::::::::0::10:13::22:24:26::42:::
44	TGCGCCAGCACCCCGGCGGAGGGTTATGGCTACACCTTC	TRBV4-3	TRBD2	TRBJ1-2	TRBV4	TRBJ1	CASTPAEGYGYTF	TGCGCCAGCACCCCGGCGGAGGGTTATGGCTACACCTTC	:::::::::0:-7:10:17:-10:0:23:24:-5:39:::
45	TGCGCCAGCAGCCAAAAGACGGGCGGGGGACCCTACGAGCAGTACTTC	TRBV4-1	TRBD1	TRBJ2-7	TRBV4	TRBJ2	CASSQKTGGGPYEQYF	TGCGCCAGCAGCCAAAAGACGGGCGGGGGACCCTACGAGCAGTACTTC	:::::::::0:-2:15:26:0:-7:31:31:-2:48:::
46	TGCGCCAGCAGCCAAAATGACAGGGCGGCTAATGAAAAACTGTTTTTT	TRBV4-3	TRBD1	TRBJ1-4	TRBV4	TRBJ1	CASSQNDRAANEKLFF	TGCGCCAGCAGCCAAAATGACAGGGCGGCTAATGAAAAACTGTTTTTT	:::::::::0:17:18:18:::25:28::48:::
47	TGCGCCAGCAGCCAAGACCACAGCCTCTCTCCCCAGCATTTT	TRBV4-1		TRBJ1-5	TRBV4	TRBJ1	CASSQDHSLSPQHF	TGCGCCAGCAGCCAAGACCACAGCCTCTCTCCCCAGCATTTT	:::::::::0:17:17:::::30::42:::
48	TGCGCCAGCAGCCAAGATAACGCTGGCGCTTATGGCTACACCTTC	TRBV4-3	TRBD1	TRBJ1-2	TRBV4	TRBJ1	CASSQDNAGAYGYTF	TGCGCCAGCAGCCAAGATAACGCTGGCGCTTATGGCTACACCTTC	:::::::::0:1:18:24:-9:2:29:30:-5:45:::
49	TGCGCCAGCAGCCAAGATAGCGGGACAGGAGCCTACGAGCAGTACTTC	TRBV4-3	TRBD1	TRBJ2-7	TRBV4	TRBJ2	CASSQDSGTGAYEQYF	TGCGCCAGCAGCCAAGATAGCGGGACAGGAGCCTACGAGCAGTACTTC	:::::::::0:1:18:20:1:-4:29:31:-2:48:::
50	TGCGCCAGCAGCCAAGATAGGGCGAACACTGAAGCTTTCTTT	TRBV4-1	TRBD2	TRBJ1-1	TRBV4	TRBJ1	CASSQDRANTEAFF	TGCGCCAGCAGCCAAGATAGGGCGAACACTGAAGCTTTCTTT	:::::::::0:1:18:18:-12:1:23:23:-1:42:::
51	TGCGCCAGCAGCCAAGATGAGCGGTGGTCGGGCTACACCTTC	TRBV4-3	TRBD2	TRBJ1-2	TRBV4	TRBJ1	CASSQDERWSGYTF	TGCGCCAGCAGCCAAGATGAGCGGTGGTCGGGCTACACCTTC	:::::::::0:17:18:19:::24:30::42:::
52	TGCGCCAGCAGCCAAGCCCCTGGACGATACGAGCAGTACTTC	TRBV4-3	TRBD1	TRBJ2-7	TRBV4	TRBJ2	CASSQAPGRYEQYF	TGCGCCAGCAGCCAAGCCCCTGGACGATACGAGCAGTACTTC	:::::::::0::16:16:::22:27::42:::
53	TGCGCCAGCAGCCAAGCGGGCCACGGATACGAGCAGTACTTC	TRBV4-3	TRBD2	TRBJ2-7	TRBV4	TRBJ2	CASSQAGHGYEQYF	TGCGCCAGCAGCCAAGCGGGCCACGGATACGAGCAGTACTTC	:::::::::0:-1:16:17:-13:2:22:27:-4:42:::
54	TGCGCCAGCAGCCAAGGAGGCAGCTACAATGAAAAACTGTTTTTT	TRBV4-3		TRBJ1-4	TRBV4	TRBJ1	CASSQGGSYNEKLFF	TGCGCCAGCAGCCAAGGAGGCAGCTACAATGAAAAACTGTTTTTT	:::::::::0::16:::::27::45:::
55	TGCGCCAGCAGCCAAGGATCCGCAGGGAACCAGCCCCAGCATTTT	TRBV4-3	TRBD1	TRBJ1-5	TRBV4	TRBJ1	CASSQGSAGNQPQHF	TGCGCCAGCAGCCAAGGATCCGCAGGGAACCAGCCCCAGCATTTT	:::::::::0:18:20:22:::27:27::45:::
56	TGCGCCAGCAGCCAAGGGCAGGGCTACGAGCAGTACTTC	TRBV4-1	TRBD1	TRBJ2-7	TRBV4	TRBJ2	CASSQGQGYEQYF	TGCGCCAGCAGCCAAGGGCAGGGCTACGAGCAGTACTTC	:::::::::0:-1:16:18:-4:-3:23:23:-3:39:::
57	TGCGCCAGCAGCCAAGGGTCAGGGGTCGGTAATTCACCCCTCCACTTT	TRBV4-1	TRBD1	TRBJ1-6	TRBV4	TRBJ1	CASSQGSGVGNSPLHF	TGCGCCAGCAGCCAAGGGTCAGGGGTCGGTAATTCACCCCTCCACTTT	:::::::::0::16:16::27:28:29::48:::
58	TGCGCCAGCAGCCAAGGTAGCGGGACAGGAGCCTACGAGCAGTACTTC	TRBV4-3	TRBD1	TRBJ2-7	TRBV4	TRBJ2	CASSQGSGTGAYEQYF	TGCGCCAGCAGCCAAGGTAGCGGGACAGGAGCCTACGAGCAGTACTTC	:::::::::0:-1:16:20:1:-4:29:31:-2:48:::
59	TGCGCCAGCAGCCAAGTAGCCAGTAACTATGGCTACACCTTC	TRBV4-3		TRBJ1-2	TRBV4	TRBJ1	CASSQVASNYGYTF	TGCGCCAGCAGCCAAGTAGCCAGTAACTATGGCTACACCTTC	:::::::::0:-1:16:::::23:-1:42:::
60	TGCGCCAGCAGCCACGGGACGGCCTATGGCTACACCTTC	TRBV5-1	TRBD2	TRBJ1-2	TRBV5	TRBJ1	CASSHGTAYGYTF	TGCGCCAGCAGCCACGGGACGGCCTATGGCTACACCTTC	:::::::::0::12:14::22:23:23::39:::
61	TGCGCCAGCAGCCCAGGGGCGGGGGCCGCCTACGAGCAGTACTTC	TRBV4-3	TRBD1	TRBJ2-7	TRBV4	TRBJ2	CASSPGAGAAYEQYF	TGCGCCAGCAGCCCAGGGGCGGGGGCCGCCTACGAGCAGTACTTC	:::::::::0:-4:13:13:-4:-2:19:28:-2:45:::
62	TGCGCCAGCAGCCCCCGCGGGGTGCCCGGGGAGCTGTTTTTT	TRBV4-3	TRBD2	TRBJ2-2	TRBV4	TRBJ2	CASSPRGVPGELFF	TGCGCCAGCAGCCCCCGCGGGGTGCCCGGGGAGCTGTTTTTT	:::::::::0:-4:13:13:12:-23:18:25:-6:42:::
63	TGCGCCAGCAGCCCCCGGGAGGTCACTGAAGCTTTCTTT	TRBV4-1	TRBD1	TRBJ1-1	TRBV4	TRBJ1	CASSPREVTEAFF	TGCGCCAGCAGCCCCCGGGAGGTCACTGAAGCTTTCTTT	:::::::::0:-4:13:13:3:-8:20:23:-4:39:::
64	TGCGCCAGCAGCCCCCGGGGTGGGGTTTATGGCTACACCTTC	TRBV5-1	TRBD1	TRBJ1-2	TRBV5	TRBJ1	CASSPRGGVYGYTF	TGCGCCAGCAGCCCCCGGGGTGGGGTTTATGGCTACACCTTC	:::::::::0:-4:12:13:3:-9:19:27:-5:42:::
65	TGCGCCAGCAGCCCCGCGGAGGCCTACGAGCAGTACTTC	TRBV5-1	TRBD2	TRBJ2-7	TRBV5	TRBJ2	CASSPAEAYEQYF	TGCGCCAGCAGCCCCGCGGAGGCCTACGAGCAGTACTTC	:::::::::0::12:12:::17:22::39:::
66	TGCGCCAGCAGCCCCGGACAGGGCCCCTACGAGCAGTACTTC	TRBV4-3	TRBD1	TRBJ2-7	TRBV4	TRBJ2	CASSPGQGPYEQYF	TGCGCCAGCAGCCCCGGACAGGGCCCCTACGAGCAGTACTTC	:::::::::0:-4:13:15:-1:-3:23:25:-2:42:::
67	TGCGCCAGCAGCCCCGGGACAGGAGCGGGCTATGGCTACACCTTC	TRBV5-1	TRBD1	TRBJ1-2	TRBV5	TRBJ1	CASSPGTGAGYGYTF	TGCGCCAGCAGCCCCGGGACAGGAGCGGGCTATGGCTACACCTTC	:::::::::0::12:12:15::23:29::45:::
68	TGCGCCAGCAGCCCCTACTCAGGGGGAGGTGAGCAGTTCTTC	TRBV4-3	TRBD1	TRBJ2-1	TRBV4	TRBJ2	CASSPYSGGGEQFF	TGCGCCAGCAGCCCCTACTCAGGGGGAGGTGAGCAGTTCTTC	:::::::::0::13:19:::26:29::42:::
69	TGCGCCAGCAGCCCCTCTCCAGGGGAGGCCTATGGCTACACCTTC	TRBV4-3	TRBD1	TRBJ1-2	TRBV4	TRBJ1	CASSPSPGEAYGYTF	TGCGCCAGCAGCCCCTCTCCAGGGGAGGCCTATGGCTACACCTTC	:::::::::0::13:19:::25:29::45:::
70	TGCGCCAGCAGCCTTACGGGGGAGGCCTACGAGCAGTACTTC	TRBV4-1	TRBD2	TRBJ2-7	TRBV4	TRBJ2	CASSLTGEAYEQYF	TGCGCCAGCAGCCTTACGGGGGAGGCCTACGAGCAGTACTTC	:::::::::0:-4:13:19:-9:-1:25:25:-2:42:::
71	TGCGCCAGCAGCGGGGCGGGGGGGTACGAGCAGTACTTC	TRBV5-1	TRBD2	TRBJ2-7	TRBV5	TRBJ2	CASSGAGGYEQYF	TGCGCCAGCAGCGGGGCGGGGGGGTACGAGCAGTACTTC	:::::::::0::12:15::24:24:24::39:::
72	TGCGCCAGCAGCGGGGGACAGGGGGCCTACGAGCAGTACTTC	TRBV5-1	TRBD1	TRBJ2-7	TRBV5	TRBJ2	CASSGGQGAYEQYF	TGCGCCAGCAGCGGGGGACAGGGGGCCTACGAGCAGTACTTC	:::::::::0:-4:12:14:0:-1:25:25:-2:42:::
73	TGCGCCAGCAGCTTGGCCGAGGCTTACGAGCAGTACTTC	TRBV5-1		TRBJ2-7	TRBV5	TRBJ2	CASSLAEAYEQYF	TGCGCCAGCAGCTTGGCCGAGGCTTACGAGCAGTACTTC	:::::::::0:16:21:::::24::39:::
74	TGCGCCAGCAGCTTGGCCGGGACAGGTTCCTACGAGCAGTACTTC	TRBV5-1	TRBD1	TRBJ2-7	TRBV5	TRBJ2	CASSLAGTGSYEQYF	TGCGCCAGCAGCTTGGCCGGGACAGGTTCCTACGAGCAGTACTTC	:::::::::0:2:18:18:0:-4:26:27:-1:45:::
75	TGCGCCAGCAGCTTGGTCGCTAGCGGGGGTTACGAGCAGTACTTC	TRBV5-1	TRBD2	TRBJ2-7	TRBV5	TRBJ2	CASSLVASGGYEQYF	TGCGCCAGCAGCTTGGTCGCTAGCGGGGGTTACGAGCAGTACTTC	:::::::::0:0:16:19:-4:-4:27:30:-4:45:::
76	TGCGCCAGCAGTGATTATGGGGATTCACCCCTCCACTTT	TRBV10-1		TRBJ1-6	TRBV10	TRBJ1	CASSDYGDSPLHF	TGCGCCAGCAGTGATTATGGGGATTCACCCCTCCACTTT	:::::::::0::14:::::22::39:::
77	TGCGCCAGCAGTGCTACGGGTGCCTACGAGCAGTACTTC	TRBV10-2		TRBJ2-7	TRBV10	TRBJ2	CASSATGAYEQYF	TGCGCCAGCAGTGCTACGGGTGCCTACGAGCAGTACTTC	:::::::::0::13:::::22::39:::
78	TGCGCCAGCAGTGGGGGAGTGAACACTGAAGCTTTCTTT	TRBV10-2	TRBD2	TRBJ1-1	TRBV10	TRBJ1	CASSGGVNTEAFF	TGCGCCAGCAGTGGGGGAGTGAACACTGAAGCTTTCTTT	:::::::::0:-4:13:14:-9:-2:19:19:0:39:::
79	TGCGCCAGCAGTGTTGCTCAGGTCACCGGGGAGCTGTTTTTT	TRBV10-1		TRBJ2-2	TRBV10	TRBJ2	CASSVAQVTGELFF	TGCGCCAGCAGTGTTGCTCAGGTCACCGGGGAGCTGTTTTTT	:::::::::0::13:::::23::42:::
80	TGCGCCAGCATGGGAGCGGGGGGGAGCTCCTACAATGAGCAGTTCTTC	TRBV5-1	TRBD2	TRBJ2-1	TRBV5	TRBJ2	CASMGAGGSSYNEQFF	TGCGCCAGCATGGGAGCGGGGGGGAGCTCCTACAATGAGCAGTTCTTC	:::::::::0:-6:10:14:-6:-4:20:22:4:48:::
81	TGCTCCCAGGGGGACAGGGGTCTTAACACTGAAGCTTTCTTT	TRBV19	TRBD1	TRBJ1-1	TRBV19*00	TRBJ1	CSQGDRGLNTEAFF	TGCTCCCAGGGGGACAGGGGTCTTAACACTGAAGCTTTCTTT	:::::::::0::9:10:10::20:24::42:::
82	TGTACCAGCAGCGCCCCAGCGGGGGTCGGCGAGCAGTACTTC	TRBV11-1	TRBD2	TRBJ2-7	TRBV11	TRBJ2	CTSSAPAGVGEQYF	TGTACCAGCAGCGCCCCAGCGGGGGTCGGCGAGCAGTACTTC	:::::::::0:-5:12:17:-6:-4:23:29:-6:42:::
83	TGTACCAGCAGCGTAAAAGTGATCGGGGAGCTGTTTTTT	TRBV9		TRBJ2-2	TRBV9	TRBJ2	CTSSVKVIGELFF	TGTACCAGCAGCGTAAAAGTGATCGGGGAGCTGTTTTTT	:::::::::0:-1:15:::::23:-7:39:::
84	TGTGACAGGGTCTCGCAAGAGACCCAGTACTTC	TRBV28		TRBJ2-5	TRBV28*00	TRBJ2	CDRVSQETQYF	TGTGACAGGGTCTCGCAAGAGACCCAGTACTTC	:::::::::0::8:::::15::33:::
85	TGTGCCACAAGCAGGTCCAAAGCCTACGAGCAGTACTTC	TRBV15		TRBJ2-7	TRBV15	TRBJ2	CATSRSKAYEQYF	TGTGCCACAAGCAGGTCCAAAGCCTACGAGCAGTACTTC	:::::::::0:-3:14:::::22:-2:39:::
86	TGTGCCACAGGACCGGGAGGGAACACTGAAGCTTTCTTT	TRBV9	TRBD2	TRBJ1-1	TRBV9	TRBJ1	CATGPGGNTEAFF	TGTGCCACAGGACCGGGAGGGAACACTGAAGCTTTCTTT	:::::::::0:-9:7:13:-8:-1:20:20:-1:39:::
87	TGTGCCACAGGCCGGTCCTCGACCTACGAGCAGTACTTC	TRBV15		TRBJ2-7	TRBV15*00	TRBJ2	CATGRSSTYEQYF	TGTGCCACAGGCCGGTCCTCGACCTACGAGCAGTACTTC	:::::::::0::8:::::22::39:::
88	TGTGCCACCACTAACCGACCCTCTGGGGCCAACGTCCTGACTTTC	TRBV27		TRBJ2-6	TRBV27*00	TRBJ2	CATTNRPSGANVLTF	TGTGCCACCACTAACCGACCCTCTGGGGCCAACGTCCTGACTTTC	:::::::::0::10:::::20:20:45:::
89	TGTGCCACCAGCACCTCCGCAGGGGGCAGTCAGCCCCAGCATTTT	TRBV15	TRBD1	TRBJ1-5	TRBV15	TRBJ1	CATSTSAGGSQPQHF	TGTGCCACCAGCACCTCCGCAGGGGGCAGTCAGCCCCAGCATTTT	:::::::::0:-4:13:19:-4:-2:25:25:-2:45:::
90	TGTGCCACCAGCACGGCAGGGGCCTACGAGCAGTACTTC	TRBV15	TRBD1	TRBJ2-7	TRBV15	TRBJ2	CATSTAGAYEQYF	TGTGCCACCAGCACGGCAGGGGCCTACGAGCAGTACTTC	:::::::::0:-4:13:16:-4:-2:22:22:-2:39:::
91	TGTGCCACCAGCAGAGATAGTGCAGGAAACTATGGCTACACCTTC	TRBV15		TRBJ1-2	TRBV15	TRBJ1	CATSRDSAGNYGYTF	TGTGCCACCAGCAGAGATAGTGCAGGAAACTATGGCTACACCTTC	:::::::::0:1:18:::::27:-2:45:::
92	TGTGCCACCAGCAGAGATCAAGAGGGAGCCAATCAGCCCCAGCATTTT	TRBV15	TRBD2	TRBJ1-5	TRBV15*00	TRBJ1	CATSRDQEGANQPQHF	TGTGCCACCAGCAGAGATCAAGAGGGAGCCAATCAGCCCCAGCATTTT	:::::::::0:17:19:20:::28:29::48:::
93	TGTGCCACCAGCAGAGCCCCTCTGGCCGATGAGCAGTTCTTC	TRBV15	TRBD1	TRBJ2-1	TRBV15*00	TRBJ2	CATSRAPLADEQFF	TGTGCCACCAGCAGAGCCCCTCTGGCCGATGAGCAGTTCTTC	:::::::::0::16:16:::21:28::42:::
94	TGTGCCACCAGCAGAGCGGACCCTGCCTACGAGCAGTACTTC	TRBV15	TRBD1	TRBJ2-7	TRBV15*00	TRBJ2	CATSRADPAYEQYF	TGTGCCACCAGCAGAGCGGACCCTGCCTACGAGCAGTACTTC	:::::::::0::16:20:::25:25::42:::
95	TGTGCCACCAGCAGAGGACAGGGTTACGAGCAGTACGTC	TRBV15	TRBD1	TRBJ2-7	TRBV15*00	TRBJ2	CATSRGQGYEQYV	TGTGCCACCAGCAGAGGACAGGGTTACGAGCAGTACGTC	:::::::::0::16:16:::23:24::39:::
96	TGTGCCACCAGCAGAGGAGTAGGTTACGAGCAGTACGTC	TRBV15		TRBJ2-7	TRBV15	TRBJ2	CATSRGVGYEQYV	TGTGCCACCAGCAGAGGAGTAGGTTACGAGCAGTACGTC	:::::::::0:-1:16:::::24:-4:39:::
97	TGTGCCACCAGCAGAGGCCCTTCCTACGAGCAGTACTTC	TRBV15	TRBD2	TRBJ2-7	TRBV15*00	TRBJ2	CATSRGPSYEQYF	TGTGCCACCAGCAGAGGCCCTTCCTACGAGCAGTACTTC	:::::::::0::16:16::17:21:21::39:::
98	TGTGCCACCAGCAGATCGCTTGGCTACGAGCAGTACTTC	TRBV15		TRBJ2-7	TRBV15	TRBJ2	CATSRSLGYEQYF	TGTGCCACCAGCAGATCGCTTGGCTACGAGCAGTACTTC	:::::::::0:-2:15:::::23:-3:39:::
99	TGTGCCACCAGCAGCGGGACAGGACCCTACGAGCAGTACGTC	TRBV15	TRBD1	TRBJ2-7	TRBV15*00	TRBJ2	CATSSGTGPYEQYV	TGTGCCACCAGCAGCGGGACAGGACCCTACGAGCAGTACGTC	:::::::::0::14:14:15::20:20:24:42:::
100	TGTGCCACCAGCAGGACCCCCGGGTACAATGAGCAGTTCTTC	TRBV15	TRBD1	TRBJ2-1	TRBV15	TRBJ2	CATSRTPGYNEQFF	TGTGCCACCAGCAGGACCCCCGGGTACAATGAGCAGTTCTTC	:::::::::0:-3:14:18:3:-9:24:24:-4:42:::
101	TGTGCCACCAGCAGGATCCCCGGGTACAATGAGCAGTTCTTC	TRBV15	TRBD1	TRBJ2-1	TRBV15*00	TRBJ2	CATSRIPGYNEQFF	TGTGCCACCAGCAGGATCCCCGGGTACAATGAGCAGTTCTTC	:::::::::0:16:18:18:21::24:24::42:::
102	TGTGCCACCAGCAGGGGACAGGCCTACGAGCAGTACTTC	TRBV15	TRBD1	TRBJ2-7	TRBV15*00	TRBJ2	CATSRGQAYEQYF	TGTGCCACCAGCAGGGGACAGGCCTACGAGCAGTACTTC	:::::::::0::14:14:14::22:22::39:::
103	TGTGCCACCAGCAGGGGCGGAGGGTACGAGCAGTACTTC	TRBV15	TRBD2	TRBJ2-7	TRBV15	TRBJ2	CATSRGGGYEQYF	TGTGCCACCAGCAGGGGCGGAGGGTACGAGCAGTACTTC	:::::::::0:-3:14:18:-10:0:24:24:-4:39:::
104	TGTGCCACCAGCAGGTCCAAAGCCTACGAGCAGTACTTC	TRBV15		TRBJ2-7	TRBV15*00	TRBJ2	CATSRSKAYEQYF	TGTGCCACCAGCAGGTCCAAAGCCTACGAGCAGTACTTC	:::::::::0::14:::::22::39:::
105	TGTGCCACCAGCAGTAGTCTTTCCTACGAGCAGTACTTC	TRBV15		TRBJ2-7	TRBV15*00	TRBJ2	CATSSSLSYEQYF	TGTGCCACCAGCAGTAGTCTTTCCTACGAGCAGTACTTC	:::::::::0:17:20:::::21::39:::
106	TGTGCCACCAGCAGTGGAGGAGCCTACGAGCAGTACTTC	TRBV15		TRBJ2-7	TRBV15*00	TRBJ2	CATSSGGAYEQYF	TGTGCCACCAGCAGTGGAGGAGCCTACGAGCAGTACTTC	:::::::::0::14:::::17:22:39:::
107	TGTGCCACCAGCCAGGCAGCTAACTATGGCTACACCTTC	TRBV15		TRBJ1-2	TRBV15	TRBJ1	CATSQAANYGYTF	TGTGCCACCAGCCAGGCAGCTAACTATGGCTACACCTTC	:::::::::0:-5:12:::::17:2:39:::
108	TGTGCCACCAGCCGATCACGGCCCGCGGCAGCCCCGAAAGAAAAACTGTTTTTT	TRBV15	TRBD1	TRBJ1-4	TRBV15	TRBJ1	CATSRSRPAAAPKEKLFF	TGTGCCACCAGCCGATCACGGCCCGCGGCAGCCCCGAAAGAAAAACTGTTTTTT	:::::::::0:-5:12:30:12:-19:35:39:-8:54:::
109	TGTGCCACCAGCCGCGCAGGGGCCTACGAGCAGTACGTC	TRBV15	TRBD1	TRBJ2-7	TRBV15*00	TRBJ2	CATSRAGAYEQYV	TGTGCCACCAGCCGCGCAGGGGCCTACGAGCAGTACGTC	:::::::::0::12:16:::22:22::39:::
110	TGTGCCACCAGCCGGGGGTTGACCTACGAGCAGTACTTC	TRBV15	TRBD1	TRBJ2-7	TRBV15	TRBJ2	CATSRGLTYEQYF	TGTGCCACCAGCCGGGGGTTGACCTACGAGCAGTACTTC	:::::::::0:-5:12:13:-6:-1:18:22:-2:39:::
111	TGTGCCACCAGCCTCGGGACCGCCTACGAGCAGTACGTC	TRBV15		TRBJ2-7	TRBV15*00	TRBJ2	CATSLGTAYEQYV	TGTGCCACCAGCCTCGGGACCGCCTACGAGCAGTACGTC	:::::::::0::12:::::16:20:39:::
112	TGTGCCACCAGCGAACAGGGGGCGATAGATACGCAGTATTTT	TRBV15	TRBD1	TRBJ2-3	TRBV15*00	TRBJ2	CATSEQGAIDTQYF	TGTGCCACCAGCGAACAGGGGGCGATAGATACGCAGTATTTT	:::::::::0::12:14::23:24:26::42:::
113	TGTGCCACCAGCGCCACGACAGGACTCGAGCAGTACGTC	TRBV15	TRBD1	TRBJ2-7	TRBV15	TRBJ2	CATSATTGLEQYV	TGTGCCACCAGCGCCACGACAGGACTCGAGCAGTACGTC	:::::::::0:-5:12:17:-2:-4:23:26:-6:39:::
114	TGTGCCACCAGCGCCAGCACAGGGCTTGAGCAGTTCTTC	TRBV15	TRBD1	TRBJ2-1	TRBV15*00	TRBJ2	CATSASTGLEQFF	TGTGCCACCAGCGCCAGCACAGGGCTTGAGCAGTTCTTC	:::::::::0::12:18:::24:26::39:::
115	TGTGCCACCAGCGCCCAACAGGGAGCCGGGGAGCTGTTTTTT	TRBV15	TRBD1	TRBJ2-2	TRBV15*00	TRBJ2	CATSAQQGAGELFF	TGTGCCACCAGCGCCCAACAGGGAGCCGGGGAGCTGTTTTTT	:::::::::0::12:17:::23:25::42:::
116	TGTGCCACCAGCGCTGGGCCGGAGATGTACGAGCAGTACTTC	TRBV15	TRBD2	TRBJ2-7	TRBV15*00	TRBJ2	CATSAGPEMYEQYF	TGTGCCACCAGCGCTGGGCCGGAGATGTACGAGCAGTACTTC	:::::::::0::12:15::18:20:27::42:::
117	TGTGCCACCAGCGGACGGCCAGCCGACGAGCAGTACTTC	TRBV15		TRBJ2-7	TRBV15*00	TRBJ2	CATSGRPADEQYF	TGTGCCACCAGCGGACGGCCAGCCGACGAGCAGTACTTC	:::::::::0::15:::::22::39:::
118	TGTGCCACCAGCGGAGGGGGCGGGTACGAGCAGTACGTC	TRBV15	TRBD1	TRBJ2-7	TRBV15*00	TRBJ2	CATSGGGGYEQYV	TGTGCCACCAGCGGAGGGGGCGGGTACGAGCAGTACGTC	:::::::::0::16:16::21:22:24::39:::
119	TGTGCCACCAGCGGAGGGGGGGGCTACGAGCAGTACTTC	TRBV15	TRBD1	TRBJ2-7	TRBV15*00	TRBJ2	CATSGGGGYEQYF	TGTGCCACCAGCGGAGGGGGGGGCTACGAGCAGTACTTC	:::::::::0::16:16:::21:23::39:::
120	TGTGCCACCAGCGGCGGAGGGGGCTACGAGCAGTACTTC	TRBV15	TRBD1	TRBJ2-7	TRBV15*00	TRBJ2	CATSGGGGYEQYF	TGTGCCACCAGCGGCGGAGGGGGCTACGAGCAGTACTTC	:::::::::0::12:17:::23:23::39:::
121	TGTGCCACCAGCGGGTCCGGCAACTACGAGCAGTACTTC	TRBV15		TRBJ2-7	TRBV15*00	TRBJ2	CATSGSGNYEQYF	TGTGCCACCAGCGGGTCCGGCAACTACGAGCAGTACTTC	:::::::::0::12:::::23::39:::
122	TGTGCCACCAGCGTGACAGGGGGGAATTCACCCCTCCACTTT	TRBV15	TRBD1	TRBJ1-6	TRBV15*00	TRBJ1	CATSVTGGNSPLHF	TGTGCCACCAGCGTGACAGGGGGGAATTCACCCCTCCACTTT	:::::::::0::12:14:::23:24::42:::
123	TGTGCCACCAGTCCTGGTACGGCCTACGAGCAGTACTTC	TRBV15		TRBJ2-7	TRBV15*00	TRBJ2	CATSPGTAYEQYF	TGTGCCACCAGTCCTGGTACGGCCTACGAGCAGTACTTC	:::::::::0::11:::::22::39:::
124	TGTGCCACCAGTCCTGGTACGGCCTACGAGCAGTGCTTC	TRBV15		TRBJ2-7	TRBV15	TRBJ2	CATSPGTAYEQCF	TGTGCCACCAGTCCTGGTACGGCCTACGAGCAGTGCTTC	:::::::::0:-6:11:::::22:-2:39:::
125	TGTGCCACCAGTGACCCAGTCGGACTAGCGGGGGGGGTGGGATCCTACAATGAGCAGTTCTTC	TRBV24-1	TRBD2	TRBJ2-1	TRBV24	TRBJ2	CATSDPVGLAGGVGSYNEQFF	TGTGCCACCAGTGACCCAGTCGGACTAGCGGGGGGGGTGGGATCCTACAATGAGCAGTTCTTC	:::::::::0:-4:14:21:-1:0:36:42:-1:63:::
126	TGTGCCACCAGTGCTGGTACGGCCTACGAGCAGTACTTC	TRBV15		TRBJ2-7	TRBV15	TRBJ2	CATSAGTAYEQYF	TGTGCCACCAGTGCTGGTACGGCCTACGAGCAGTACTTC	:::::::::0:-6:11:::::22:-2:39:::
127	TGTGCCACCAGTTATGAGAGGAACACTGAAGCTTTCTTT	TRBV15		TRBJ1-1	TRBV15*00	TRBJ1	CATSYERNTEAFF	TGTGCCACCAGTTATGAGAGGAACACTGAAGCTTTCTTT	:::::::::0::11:::::20::39:::
128	TGTGCCACCGGACAGGCCAACGCCTACGAGCAGTACTTC	TRBV15	TRBD1	TRBJ2-7	TRBV15	TRBJ2	CATGQANAYEQYF	TGTGCCACCGGACAGGCCAACGCCTACGAGCAGTACTTC	:::::::::0:-8:9:9:-1:-4:16:22:-2:39:::
129	TGTGCCACCGGCCGGGATACAGCCTACGAGCAGTACTTC	TRBV15	TRBD1	TRBJ2-7	TRBV15	TRBJ2	CATGRDTAYEQYF	TGTGCCACCGGCCGGGATACAGCCTACGAGCAGTACTTC	:::::::::0:-8:9:11:2:-8:17:22:-2:39:::
130	TGTGCCACCGGCCGGGGGTTGACCTACGAGCAGTACTTC	TRBV15	TRBD1	TRBJ2-7	TRBV15	TRBJ2	CATGRGLTYEQYF	TGTGCCACCGGCCGGGGGTTGACCTACGAGCAGTACTTC	:::::::::0:-8:9:11:2:-9:16:22:-2:39:::
131	TGTGCCACCGGCCGGGGTACAGCATACGAGCAGTACTTC	TRBV15	TRBD1	TRBJ2-7	TRBV15	TRBJ2	CATGRGTAYEQYF	TGTGCCACCGGCCGGGGTACAGCATACGAGCAGTACTTC	:::::::::0:-8:9:11:2:-9:16:24:-4:39:::
132	TGTGCCACCGGCCGGGGTACAGCCTACGAGCAGTACTTC	TRBV15	TRBD1	TRBJ2-7	TRBV15	TRBJ2	CATGRGTAYEQYF	TGTGCCACCGGCCGGGGTACAGCCTACGAGCAGTACTTC	:::::::::0:-8:9:11:2:-9:16:22:-2:39:::
133	TGTGCCACCGGGGACAGCTACAATGAGCAGTTCTTC	TRBV15	TRBD1	TRBJ2-1	TRBV15	TRBJ2	CATGDSYNEQFF	TGTGCCACCGGGGACAGCTACAATGAGCAGTTCTTC	:::::::::0:-8:9:10:0:-5:17:17:-3:36:::
134	TGTGCCACCGGGGACAGTTACAATGAGCAGTTCTTC	TRBV15	TRBD1	TRBJ2-1	TRBV15	TRBJ2	CATGDSYNEQFF	TGTGCCACCGGGGACAGTTACAATGAGCAGTTCTTC	:::::::::0:-8:9:10:0:-5:17:18:-4:36:::
135	TGTGCCACTACGCAGGGGCCCTCCTACAAGCAGTACTTC	TRBV15	TRBD1	TRBJ2-7	TRBV15	TRBJ2	CATTQGPSYKQYF	TGTGCCACTACGCAGGGGCCCTCCTACAAGCAGTACTTC	:::::::::0:-9:8:12:-4:-2:18:20:0:39:::
136	TGTGCCACTACGCAGGGGCCCTCCTACGAGCAGTACTTC	TRBV15	TRBD1	TRBJ2-7	TRBV15	TRBJ2	CATTQGPSYEQYF	TGTGCCACTACGCAGGGGCCCTCCTACGAGCAGTACTTC	:::::::::0:-9:8:12:-4:-2:18:20:0:39:::
137	TGTGCCAGCAACACAGGGAGGAACACTGAAGCTTTCTTT	TRBV2	TRBD1	TRBJ1-1	TRBV2	TRBJ1	CASNTGRNTEAFF	TGTGCCAGCAACACAGGGAGGAACACTGAAGCTTTCTTT	:::::::::0:-7:10:12:-3:-3:18:20:-1:39:::
138	TGTGCCAGCAACTACCGACCCGGACAAGAGACCCAGTACTTC	TRBV7-4	TRBD1	TRBJ2-5	TRBV7	TRBJ2	CASNYRPGQETQYF	TGTGCCAGCAACTACCGACCCGGACAAGAGACCCAGTACTTC	:::::::::0::13:18:21::23:24::42:::
139	TGTGCCAGCAATGGAGCGGGGGGATACGAGCAGTACTTC	TRBV9	TRBD2	TRBJ2-7	TRBV9*00	TRBJ2	CASNGAGGYEQYF	TGTGCCAGCAATGGAGCGGGGGGATACGAGCAGTACTTC	:::::::::0::10:14::23:23:24::39:::
140	TGTGCCAGCACAGGACAGGGGGCCTACGAGCAGTACTTC	TRBV6-2	TRBD1	TRBJ2-7	TRBV6	TRBJ2	CASTGQGAYEQYF	TGTGCCAGCACAGGACAGGGGGCCTACGAGCAGTACTTC	:::::::::0::10:12:::22:22::39:::
141	TGTGCCAGCACCAGGTCCGGGGGGCACGAGCAGTACTTC	TRBV6-5	TRBD1	TRBJ2-7	TRBV6	TRBJ2	CASTRSGGHEQYF	TGTGCCAGCACCAGGTCCGGGGGGCACGAGCAGTACTTC	:::::::::0:-7:10:19:-6:0:25:25:-5:39:::
142	TGTGCCAGCACCCATGAGGGAGGCAACTATGGCTACACCTTC	TRBV4-2	TRBD2	TRBJ1-2	TRBV4	TRBJ1	CASTHEGGNYGYTF	TGTGCCAGCACCCATGAGGGAGGCAACTATGGCTACACCTTC	:::::::::0:-3:14:17:-9:-1:23:24:-2:42:::
143	TGTGCCAGCACCCCGTCCGGGGGAGGGGCATATGGCTACACCTTC	TRBV6-1	TRBD2	TRBJ1-2	TRBV6	TRBJ1	CASTPSGGGAYGYTF	TGTGCCAGCACCCCGTCCGGGGGAGGGGCATATGGCTACACCTTC	:::::::::0:-7:10:20:-9:0:27:30:-5:45:::
144	TGTGCCAGCACCCGAGAGGGACTAGCGGGGGGAGGTGAGCAGTTCTTC	TRBV6-1	TRBD2	TRBJ2-1	TRBV6	TRBJ2	CASTREGLAGGGEQFF	TGTGCCAGCACCCGAGAGGGACTAGCGGGGGGAGGTGAGCAGTTCTTC	:::::::::0:-7:10:17:0:-4:29:35:-9:48:::
145	TGTGCCAGCACGGTGGGAGGGGTGGCATACAATGAGCAGTTCTTC	TRBV9	TRBD2	TRBJ2-1	TRBV9*00	TRBJ2	CASTVGGVAYNEQFF	TGTGCCAGCACGGTGGGAGGGGTGGCATACAATGAGCAGTTCTTC	:::::::::0::10:14::21:21:27::45:::
146	TGTGCCAGCACTGAGCGGGGGGGCTCCTACAATGAGCAGTTCTTC	TRBV13	TRBD2	TRBJ2-1	TRBV13*00	TRBJ2	CASTERGGSYNEQFF	TGTGCCAGCACTGAGCGGGGGGGCTCCTACAATGAGCAGTTCTTC	:::::::::0::10:13:::19:19:23:45:::
147	TGTGCCAGCACTTCCACTAGCGGGGGGATGGTTCGAGATACGCAGTATTTT	TRBV27	TRBD2	TRBJ2-3	TRBV27	TRBJ2	CASTSTSGGMVRDTQYF	TGTGCCAGCACTTCCACTAGCGGGGGGATGGTTCGAGATACGCAGTATTTT	:::::::::0:-7:10:15:-3:-4:24:35:-5:51:::
148	TGTGCCAGCAGAAACTATGGCTACACCTTC	TRBV2		TRBJ1-2	TRBV2	TRBJ1	CASRNYGYTF	TGTGCCAGCAGAAACTATGGCTACACCTTC	:::::::::0:-6:11:::::12:-2:30:::
149	TGTGCCAGCAGACCACAACAGGGGAAGGGGTCCTACGAGCAGTACTTC	TRBV14	TRBD1	TRBJ2-7	TRBV14*00	TRBJ2	CASRPQQGKGSYEQYF	TGTGCCAGCAGACCACAACAGGGGAAGGGGTCCTACGAGCAGTACTTC	:::::::::0::15:17:::24:30::48:::
150	TGTGCCAGCAGCAAAGACCATCCGCAGTTCTTC	TRBV21-1		TRBJ2-1	TRBV21	TRBJ2	CASSKDHPQFF	TGTGCCAGCAGCAAAGACCATCCGCAGTTCTTC	:::::::::0:-1:16:::::23:-12:33:::
151	TGTGCCAGCAGCAAAGGGCCGGGGGCAAGGGCTTTCTTT	TRBV7-6	TRBD1	TRBJ1-1	TRBV7	TRBJ1	CASSKGPGARAFF	TGTGCCAGCAGCAAAGGGCCGGGGGCAAGGGCTTTCTTT	:::::::::0:-5:12:20:-6:0:26:30:-11:39:::
152	TGTGCCAGCAGCAAAGGTCCGGGGGCAAGGGCTTTCTTT	TRBV7-6	TRBD1	TRBJ1-1	TRBV7	TRBJ1	CASSKGPGARAFF	TGTGCCAGCAGCAAAGGTCCGGGGGCAAGGGCTTTCTTT	:::::::::0:-5:12:20:-6:0:26:30:-11:39:::
153	TGTGCCAGCAGCAAGCGGGGGAGGGCAGGGACAGCGTGCACAGATACGCAGTATTTT	TRBV21-1	TRBD2	TRBJ2-3	TRBV21	TRBJ2	CASSKRGRAGTACTDTQYF	TGTGCCAGCAGCAAGCGGGGGAGGGCAGGGACAGCGTGCACAGATACGCAGTATTTT	:::::::::0:16:17:18::25:26:37::57:::
154	TGTGCCAGCAGCAAGGCGGGGGGCGCCTACGAGCAGTTCTTC	TRBV9	TRBD1	TRBJ2-1	TRBV9	TRBJ2	CASSKAGGAYEQFF	TGTGCCAGCAGCAAGGCGGGGGGCGCCTACGAGCAGTTCTTC	:::::::::0:-4:12:18:-6:3:27:30:-10:42:::
155	TGTGCCAGCAGCACGACAGCTGAAGCTTTCTTT	TRBV5-6	TRBD1	TRBJ1-1	TRBV5	TRBJ1	CASSTTAEAFF	TGTGCCAGCAGCACGACAGCTGAAGCTTTCTTT	:::::::::0:-4:12:14:-2:-5:19:19:-6:33:::
156	TGTGCCAGCAGCACTCCGGGACAGAGCTCTGGAAACACCATATATTTT	TRBV6-1	TRBD1	TRBJ1-3	TRBV6	TRBJ1	CASSTPGQSSGNTIYF	TGTGCCAGCAGCACTCCGGGACAGAGCTCTGGAAACACCATATATTTT	:::::::::0::11:15:17::21:21:26:48:::
157	TGTGCCAGCAGCAGAGGGACAGGGGCCTACGAGCAGTACTTC	TRBV9	TRBD1	TRBJ2-7	TRBV9*00	TRBJ2	CASSRGTGAYEQYF	TGTGCCAGCAGCAGAGGGACAGGGGCCTACGAGCAGTACTTC	:::::::::0::12:15:15::25:25::42:::
158	TGTGCCAGCAGCAGCAGCGGGGGGGCACCGGTCGTAGGGTTCTTC	TRBV6-2	TRBD2	TRBJ2-1	TRBV6	TRBJ2	CASSSSGGAPVVGFF	TGTGCCAGCAGCAGCAGCGGGGGGGCACCGGTCGTAGGGTTCTTC	:::::::::0::11:15::25:26:38::45:::
159	TGTGCCAGCAGCATTAGCGGTTCCTACAATGAGCAGTTCTTC	TRBV9	TRBD2	TRBJ2-1	TRBV9	TRBJ2	CASSISGSYNEQFF	TGTGCCAGCAGCATTAGCGGTTCCTACAATGAGCAGTTCTTC	:::::::::0:-4:12:14:-5:-5:20:21:-1:42:::
160	TGTGCCAGCAGCCAAGAAACTGGGATGGATACGCAGTATTTT	TRBV14		TRBJ2-3	TRBV14	TRBJ2	CASSQETGMDTQYF	TGTGCCAGCAGCCAAGAAACTGGGATGGATACGCAGTATTTT	:::::::::0:0:17:::::27:-6:42:::
161	TGTGCCAGCAGCCAAGAAGCGTCCTACAATGAGCAGTTCTTC	TRBV3-1		TRBJ2-1	TRBV3	TRBJ2	CASSQEASYNEQFF	TGTGCCAGCAGCCAAGAAGCGTCCTACAATGAGCAGTTCTTC	:::::::::0:0:17:::::21:-1:42:::
162	TGTGCCAGCAGCCAAGAAGGCCGGTCGCCAGATACGCAGTATTTT	TRBV9		TRBJ2-3	TRBV9	TRBJ2	CASSQEGRSPDTQYF	TGTGCCAGCAGCCAAGAAGGCCGGTCGCCAGATACGCAGTATTTT	:::::::::0:-4:12:::::28:-4:45:::
163	TGTGCCAGCAGCCAAGAGAACAGGGGGCCTTCACCCCTCCACTTT	TRBV4-2	TRBD1	TRBJ1-6	TRBV4	TRBJ1	CASSQENRGPSPLHF	TGTGCCAGCAGCCAAGAGAACAGGGGGCCTTCACCCCTCCACTTT	:::::::::0:17:17:19::28:28:29::45:::
164	TGTGCCAGCAGCCAAGAGGATACAGGGAGTGCCAACGTCCTGACTTTC	TRBV4-2	TRBD1	TRBJ2-6	TRBV4	TRBJ2	CASSQEDTGSANVLTF	TGTGCCAGCAGCCAAGAGGATACAGGGAGTGCCAACGTCCTGACTTTC	:::::::::0:17:17:21:::27:30::48:::
165	TGTGCCAGCAGCCAAGAGTCAGTCTCCTACAATGAGCAGTTCTTC	TRBV4-2		TRBJ2-1	TRBV4	TRBJ2	CASSQESVSYNEQFF	TGTGCCAGCAGCCAAGAGTCAGTCTCCTACAATGAGCAGTTCTTC	:::::::::0:17:17:::::23:23:45:::
166	TGTGCCAGCAGCCAAGAGTCAGTCTCCTACAATGGGCAGTTCTTC	TRBV4-2		TRBJ2-1	TRBV4	TRBJ2	CASSQESVSYNGQFF	TGTGCCAGCAGCCAAGAGTCAGTCTCCTACAATGGGCAGTTCTTC	:::::::::0:0:17:::::23:0:45:::
167	TGTGCCAGCAGCCAAGATAGAGCCGCACCGGGGAGCAATCAGCCCCAGCATTTT	TRBV3-1	TRBD1	TRBJ1-5	TRBV3	TRBJ1	CASSQDRAAPGSNQPQHF	TGTGCCAGCAGCCAAGATAGAGCCGCACCGGGGAGCAATCAGCCCCAGCATTTT	:::::::::0:17:18:27:29::32:33::54:::
168	TGTGCCAGCAGCCAAGATAGCGGGGGGGGAGAGACCCAGTACTTC	TRBV3-1	TRBD2	TRBJ2-5	TRBV3	TRBJ2	CASSQDSGGGETQYF	TGTGCCAGCAGCCAAGATAGCGGGGGGGGAGAGACCCAGTACTTC	:::::::::0:1:18:18:-6:0:28:29:-4:45:::
169	TGTGCCAGCAGCCAAGATAGGGCAGCGAACACTGAAGCTTTCTTT	TRBV4-2	TRBD2	TRBJ1-1	TRBV4	TRBJ1	CASSQDRAANTEAFF	TGTGCCAGCAGCCAAGATAGGGCAGCGAACACTGAAGCTTTCTTT	:::::::::0:1:18:18:-12:1:23:26:-1:45:::
170	TGTGCCAGCAGCCAAGATCGGGGGGCGCTTGAGCAGTTCTTC	TRBV4-2	TRBD1	TRBJ2-1	TRBV4	TRBJ2	CASSQDRGALEQFF	TGTGCCAGCAGCCAAGATCGGGGGGCGCTTGAGCAGTTCTTC	:::::::::0:17:19:20::26:28:29::42:::
171	TGTGCCAGCAGCCAAGATTCCCCAGTCTACAATGAGCAGTTCTTC	TRBV3-1		TRBJ2-1	TRBV3	TRBJ2	CASSQDSPVYNEQFF	TGTGCCAGCAGCCAAGATTCCCCAGTCTACAATGAGCAGTTCTTC	:::::::::0:17:18:::::26::45:::
172	TGTGCCAGCAGCCAAGCAACCCTAGCGGGGGTCTCCTACAATGAGCAGTTCTTC	TRBV4-2	TRBD2	TRBJ2-1	TRBV4	TRBJ2	CASSQATLAGVSYNEQFF	TGTGCCAGCAGCCAAGCAACCCTAGCGGGGGTCTCCTACAATGAGCAGTTCTTC	:::::::::0::16:21:::29:32:32:54:::
173	TGTGCCAGCAGCCAAGCCACTGCGTACGAGCAGTACTTC	TRBV4-2		TRBJ2-7	TRBV4	TRBJ2	CASSQATAYEQYF	TGTGCCAGCAGCCAAGCCACTGCGTACGAGCAGTACTTC	:::::::::0::16:::::24::39:::
174	TGTGCCAGCAGCCAAGGAATCTATGGCTACACCTTC	TRBV3-1		TRBJ1-2	TRBV3	TRBJ1	CASSQGIYGYTF	TGTGCCAGCAGCCAAGGAATCTATGGCTACACCTTC	:::::::::0:19:28:::::20::36:::
175	TGTGCCAGCAGCCAAGGACAGGGGGCCTACGAGCAGTACTTC	TRBV3-2	TRBD1	TRBJ2-7	TRBV3	TRBJ2	CASSQGQGAYEQYF	TGTGCCAGCAGCCAAGGACAGGGGGCCTACGAGCAGTACTTC	:::::::::0::16:16:::25:25::42:::
176	TGTGCCAGCAGCCAAGGACAGGGTGGGCCCCTCCACTTT	TRBV4-2	TRBD1	TRBJ1-6	TRBV4	TRBJ1	CASSQGQGGPLHF	TGTGCCAGCAGCCAAGGACAGGGTGGGCCCCTCCACTTT	:::::::::0:-1:16:16:-2:-3:23:27:-13:39:::
177	TGTGCCAGCAGCCAAGGAGGGACAGCTTACGAGCAGTACTTC	TRBV14	TRBD1	TRBJ2-7	TRBV14*00	TRBJ2	CASSQGGTAYEQYF	TGTGCCAGCAGCCAAGGAGGGACAGCTTACGAGCAGTACTTC	:::::::::0::16:18:18::25:27::42:::
178	TGTGCCAGCAGCCAAGGCGGGGGGCTAACAGGGGCCTACGAGCAGTACTTC	TRBV4-2	TRBD1	TRBJ2-7	TRBV4	TRBJ2	CASSQGGGLTGAYEQYF	TGTGCCAGCAGCCAAGGCGGGGGGCTAACAGGGGCCTACGAGCAGTACTTC	:::::::::0:-1:16:27:-3:-2:34:34:-2:51:::
179	TGTGCCAGCAGCCAATTACAGGGGGCCTTTCCTGGGGCCAACGTCCTGACTTTC	TRBV14	TRBD1	TRBJ2-6	TRBV14	TRBJ2	CASSQLQGAFPGANVLTF	TGTGCCAGCAGCCAATTACAGGGGGCCTTTCCTGGGGCCAACGTCCTGACTTTC	:::::::::0:-2:15:17:-3:0:26:31:-2:54:::
180	TGTGCCAGCAGCCACAGGGGACAGCCCCAGCATTTT	TRBV4-2	TRBD1	TRBJ1-5	TRBV4	TRBJ1	CASSHRGQPQHF	TGTGCCAGCAGCCACAGGGGACAGCCCCAGCATTTT	:::::::::0::14:14:::20:21::36:::
181	TGTGCCAGCAGCCACGTTATACGGGACAGCCCAACTAATGAAAAACTGTTTTTT	TRBV7-6	TRBD1	TRBJ1-4	TRBV7	TRBJ1	CASSHVIRDSPTNEKLFF	TGTGCCAGCAGCCACGTTATACGGGACAGCCCAACTAATGAAAAACTGTTTTTT	:::::::::0:-5:12:21:1:-5:29:31:0:54:::
182	TGTGCCAGCAGCCACTCCGGGCCTAACTATGGCTACACCTTC	TRBV14	TRBD1	TRBJ1-2	TRBV14*00	TRBJ1	CASSHSGPNYGYTF	TGTGCCAGCAGCCACTCCGGGCCTAACTATGGCTACACCTTC	:::::::::0::14:16:18::21:22:22:42:::
183	TGTGCCAGCAGCCAGGGGACAGTTAGCTACGAGCAGTACTTC	TRBV14	TRBD1	TRBJ2-7	TRBV14	TRBJ2	CASSQGTVSYEQYF	TGTGCCAGCAGCCAGGGGACAGTTAGCTACGAGCAGTACTTC	:::::::::0:-3:14:15:0:-5:22:26:-3:42:::
184	TGTGCCAGCAGCCATCGGACAGGGGGCGAGCAGTACTTC	TRBV3-2	TRBD1	TRBJ2-7	TRBV3	TRBJ2	CASSHRTGGEQYF	TGTGCCAGCAGCCATCGGACAGGGGGCGAGCAGTACTTC	:::::::::0::14:16:::26:26::39:::
185	TGTGCCAGCAGCCATGACCGGGACAGGGCGACGAACGGCTATGGCTACACCTTC	TRBV4-2	TRBD1	TRBJ1-2	TRBV4	TRBJ1	CASSHDRDRATNGYGYTF	TGTGCCAGCAGCCATGACCGGGACAGGGCGACGAACGGCTATGGCTACACCTTC	:::::::::0:17:17:17:19::28:38::54:::
186	TGTGCCAGCAGCCCACAGGGCGCCTACGAGCAGTACTTC	TRBV27		TRBJ2-7	TRBV27*00	TRBJ2	CASSPQGAYEQYF	TGTGCCAGCAGCCCACAGGGCGCCTACGAGCAGTACTTC	:::::::::0::11:::::16:20:39:::
187	TGTGCCAGCAGCCCAGGACTGGCCTACGAGCAGTACTTC	TRBV4-2	TRBD2	TRBJ2-7	TRBV4	TRBJ2	CASSPGLAYEQYF	TGTGCCAGCAGCCCAGGACTGGCCTACGAGCAGTACTTC	:::::::::0:-4:13:15:-1:-10:20:22:-2:39:::
188	TGTGCCAGCAGCCCAGGTTCAAGTGGGCCCCAGCATTTT	TRBV25-1		TRBJ1-5	TRBV25	TRBJ1	CASSPGSSGPQHF	TGTGCCAGCAGCCCAGGTTCAAGTGGGCCCCAGCATTTT	:::::::::0::11:::::26::39:::
189	TGTGCCAGCAGCCCCAATCTACAGGGGGCGTGGGGCTACACCTTC	TRBV6-5	TRBD1	TRBJ1-2	TRBV6	TRBJ1	CASSPNLQGAWGYTF	TGTGCCAGCAGCCCCAATCTACAGGGGGCGTGGGGCTACACCTTC	:::::::::0::11:20::29:30:33::45:::
190	TGTGCCAGCAGCCCCACTTTCGTTGCTGGGGCCAACGTCCTGACTTTC	TRBV9		TRBJ2-6	TRBV9*00	TRBJ2	CASSPTFVAGANVLTF	TGTGCCAGCAGCCCCACTTTCGTTGCTGGGGCCAACGTCCTGACTTTC	:::::::::0::12:::::25::48:::
191	TGTGCCAGCAGCCCCCATAGCGGGGGGACTAGCACAGATACGCAGTATTTT	TRBV9	TRBD2	TRBJ2-3	TRBV9*00	TRBJ2	CASSPHSGGTSTDTQYF	TGTGCCAGCAGCCCCCATAGCGGGGGGACTAGCACAGATACGCAGTATTTT	:::::::::0::12:17::27:27:28:30:51:::
192	TGTGCCAGCAGCCCCCGGACAGTAGATGAGCAGTTCTTC	TRBV9	TRBD1	TRBJ2-1	TRBV9*00	TRBJ2	CASSPRTVDEQFF	TGTGCCAGCAGCCCCCGGACAGTAGATGAGCAGTTCTTC	:::::::::0::12:12:15::22:25::39:::
193	TGTGCCAGCAGCCCCGGACCCGCTAACTATGGCTACACCTTC	TRBV3-1		TRBJ1-2	TRBV3	TRBJ1	CASSPGPANYGYTF	TGTGCCAGCAGCCCCGGACCCGCTAACTATGGCTACACCTTC	:::::::::0::13:::::21:22:42:::
194	TGTGCCAGCAGCCCCGGGACGGTCTCCTACGAGCAGTACTTC	TRBV6-2	TRBD1	TRBJ2-7	TRBV6	TRBJ2	CASSPGTVSYEQYF	TGTGCCAGCAGCCCCGGGACGGTCTCCTACGAGCAGTACTTC	:::::::::0::11:12:15::20:23:23:42:::
195	TGTGCCAGCAGCCCCGGGACTATTGCCTACGAGCAGTACTTC	TRBV7-2	TRBD2	TRBJ2-7	TRBV7	TRBJ2	CASSPGTIAYEQYF	TGTGCCAGCAGCCCCGGGACTATTGCCTACGAGCAGTACTTC	:::::::::0::12:12:15::22:25::42:::
196	TGTGCCAGCAGCCCCGGGGGAGCCTACGAGCAGTACTTC	TRBV3-2	TRBD1	TRBJ2-7	TRBV3	TRBJ2	CASSPGGAYEQYF	TGTGCCAGCAGCCCCGGGGGAGCCTACGAGCAGTACTTC	:::::::::0::13:13:15::18:22::39:::
197	TGTGCCAGCAGCCCCGGGGGAGTCTACGAGCAGTACTTC	TRBV3-1	TRBD1	TRBJ2-7	TRBV3	TRBJ2	CASSPGGVYEQYF	TGTGCCAGCAGCCCCGGGGGAGTCTACGAGCAGTACTTC	:::::::::0:-4:13:13:2:-9:18:23:-3:39:::
198	TGTGCCAGCAGCCCGACACAGGCCGGTCAGCCCCAGCATTTT	TRBV3-1	TRBD1	TRBJ1-5	TRBV3	TRBJ1	CASSPTQAGQPQHF	TGTGCCAGCAGCCCGACACAGGCCGGTCAGCCCCAGCATTTT	:::::::::0:-4:13:17:-3:-4:22:26:-6:42:::
199	TGTGCCAGCAGCCCGGCTAGCGCCGAGGGTTACGAGCAGTACTTC	TRBV6-1	TRBD2	TRBJ2-7	TRBV6	TRBJ2	CASSPASAEGYEQYF	TGTGCCAGCAGCCCGGCTAGCGCCGAGGGTTACGAGCAGTACTTC	:::::::::0::11:11:14:29:29:30::45:::
200	TGTGCCAGCAGCCCGGGACAGGGGTTTCTTACCGAGGCCCAGTACTTC	TRBV9	TRBD1	TRBJ2-5	TRBV9	TRBJ2	CASSPGQGFLTEAQYF	TGTGCCAGCAGCCCGGGACAGGGGTTTCTTACCGAGGCCCAGTACTTC	:::::::::0:-4:12:12:2:-2:24:33:-5:48:::
201	TGTGCCAGCAGCCCGGGGGGGGTCTCCTACAATGAGCAGTTCTTC	TRBV9	TRBD2	TRBJ2-1	TRBV9*00	TRBJ2	CASSPGGVSYNEQFF	TGTGCCAGCAGCCCGGGGGGGGTCTCCTACAATGAGCAGTTCTTC	:::::::::0::12:13::21:21:23:23:45:::
202	TGTGCCAGCAGCCCTGCCCCCGCGTACGAGCAGTACTTA	TRBV7-2	TRBD1	TRBJ2-7	TRBV7	TRBJ2	CASSPAPAYEQYL	TGTGCCAGCAGCCCTGCCCCCGCGTACGAGCAGTACTTA	:::::::::0:-5:12:15:12:-18:21:24:-4:39:::
203	TGTGCCAGCAGCCCTGCCCCCGCGTACGAGCAGTACTTC	TRBV7-2	TRBD1	TRBJ2-7	TRBV7	TRBJ2	CASSPAPAYEQYF	TGTGCCAGCAGCCCTGCCCCCGCGTACGAGCAGTACTTC	:::::::::0::12:15:::21:24::39:::
204	TGTGCCAGCAGCCGAACGGGACAGGGTTCCTACGAGCAGTACTTC	TRBV7-2	TRBD1	TRBJ2-7	TRBV7	TRBJ2	CASSRTGQGSYEQYF	TGTGCCAGCAGCCGAACGGGACAGGGTTCCTACGAGCAGTACTTC	:::::::::0::12:16:17::26:27::45:::
205	TGTGCCAGCAGCCGCGGCGGGGCACCCTACAATGAGCAGTTCTTC	TRBV7-3	TRBD1	TRBJ2-1	TRBV7	TRBJ2	CASSRGGAPYNEQFF	TGTGCCAGCAGCCGCGGCGGGGCACCCTACAATGAGCAGTTCTTC	:::::::::0::12:18::23:23:25::45:::
206	TGTGCCAGCAGCCGGAGGACTAGCGGGGACGAGCAGTACTTC	TRBV9	TRBD2	TRBJ2-7	TRBV9	TRBJ2	CASSRRTSGDEQYF	TGTGCCAGCAGCCGGAGGACTAGCGGGGACGAGCAGTACTTC	:::::::::0:-4:12:16:-1:-4:27:28:-5:42:::
207	TGTGCCAGCAGCCGTGACAGCGCCTACGAGCAGTACTTC	TRBV12-4		TRBJ2-7	TRBV12	TRBJ2	CASSRDSAYEQYF	TGTGCCAGCAGCCGTGACAGCGCCTACGAGCAGTACTTC	:::::::::0::11:::::18:20:39:::
208	TGTGCCAGCAGCCTAAAAGGTGTGGGCACAGATACACAGTATTTT	TRBV6-2		TRBJ2-3	TRBV6	TRBJ2	CASSLKGVGTDTQYF	TGTGCCAGCAGCCTAAAAGGTGTGGGCACAGATACACAGTATTTT	:::::::::0:-6:11:::::25:-1:45:::
209	TGTGCCAGCAGCCTAAAAGGTGTGGGCACAGATACGCAGTATTTT	TRBV6-1		TRBJ2-3	TRBV6	TRBJ2	CASSLKGVGTDTQYF	TGTGCCAGCAGCCTAAAAGGTGTGGGCACAGATACGCAGTATTTT	:::::::::0::11:::::25::45:::
210	TGTGCCAGCAGCCTCAGGGTTGGGGGCACAGATACGCAGTATTTT	TRBV7-6	TRBD1	TRBJ2-3	TRBV7	TRBJ2	CASSLRVGGTDTQYF	TGTGCCAGCAGCCTCAGGGTTGGGGGCACAGATACGCAGTATTTT	:::::::::0:-5:12:14:-4:-3:19:25:-1:45:::
211	TGTGCCAGCAGCCTCCTGCAGGCCGCCTACGAGCAGTACTTC	TRBV3-1		TRBJ2-7	TRBV3	TRBJ2	CASSLLQAAYEQYF	TGTGCCAGCAGCCTCCTGCAGGCCGCCTACGAGCAGTACTTC	:::::::::0:-4:13:::::25:-2:42:::
212	TGTGCCAGCAGCCTGACCGGGACGGACAATCAGCCCCAGCATTTT	TRBV5-6	TRBD1	TRBJ1-5	TRBV5	TRBJ1	CASSLTGTDNQPQHF	TGTGCCAGCAGCCTGACCGGGACGGACAATCAGCCCCAGCATTTT	:::::::::0:-4:12:16:2:-7:23:26:-3:45:::
213	TGTGCCAGCAGCCTGAGCGGGGGGAGCACAGATACGCAGTATTTT	TRBV5-6	TRBD2	TRBJ2-3	TRBV5	TRBJ2	CASSLSGGSTDTQYF	TGTGCCAGCAGCCTGAGCGGGGGGAGCACAGATACGCAGTATTTT	:::::::::0:-4:12:15:-6:-4:21:24:0:45:::
214	TGTGCCAGCAGCCTGGGTACAGGGTCCTACGAGCAGTACTTC	TRBV9	TRBD1	TRBJ2-7	TRBV9	TRBJ2	CASSLGTGSYEQYF	TGTGCCAGCAGCCTGGGTACAGGGTCCTACGAGCAGTACTTC	:::::::::0:-4:12:18:-3:-3:24:24:-1:42:::
215	TGTGCCAGCAGCCTTGGGACTAGCGGGGTGTACGAGCAGTACTTC	TRBV27	TRBD2	TRBJ2-7	TRBV27*00	TRBJ2	CASSLGTSGVYEQYF	TGTGCCAGCAGCCTTGGGACTAGCGGGGTGTACGAGCAGTACTTC	:::::::::0::11:15:15::27:30::45:::
216	TGTGCCAGCAGCGAAAGCTCCTATAATTCACCCCTCCACTTT	TRBV9		TRBJ1-6	TRBV9	TRBJ1	CASSESSYNSPLHF	TGTGCCAGCAGCGAAAGCTCCTATAATTCACCCCTCCACTTT	:::::::::0:-3:13:::::15:2:42:::
217	TGTGCCAGCAGCGAACACGGGGGATTGAACACTGAAGCTTTCTTT	TRBV5-4	TRBD1	TRBJ1-1	TRBV5	TRBJ1	CASSEHGGLNTEAFF	TGTGCCAGCAGCGAACACGGGGGATTGAACACTGAAGCTTTCTTT	:::::::::0::12:14:::23:25:25:45:::
218	TGTGCCAGCAGCGACGGACAGGCCTACAATGAGCAGTTCTTC	TRBV9	TRBD1	TRBJ2-1	TRBV9*00	TRBJ2	CASSDGQAYNEQFF	TGTGCCAGCAGCGACGGACAGGCCTACAATGAGCAGTTCTTC	:::::::::0::13:15:::22:22::42:::
219	TGTGCCAGCAGCGAGGGAACCGAGGCCTACGAGCAGTACTTC	TRBV9		TRBJ2-7	TRBV9	TRBJ2	CASSEGTEAYEQYF	TGTGCCAGCAGCGAGGGAACCGAGGCCTACGAGCAGTACTTC	:::::::::0:-3:13:::::25:-2:42:::
220	TGTGCCAGCAGCGAGGGACAGGGGTACAATGAGCAGTTCTTC	TRBV9	TRBD1	TRBJ2-1	TRBV9	TRBJ2	CASSEGQGYNEQFF	TGTGCCAGCAGCGAGGGACAGGGGTACAATGAGCAGTTCTTC	:::::::::0:-3:13:14:0:-2:24:24:-4:42:::
221	TGTGCCAGCAGCGAGGGACTAGCGGGGGGGCCGGCCGGGGAGCTGTTTTTT	TRBV7-6	TRBD2	TRBJ2-2	TRBV7	TRBJ2	CASSEGLAGGPAGELFF	TGTGCCAGCAGCGAGGGACTAGCGGGGGGGCCGGCCGGGGAGCTGTTTTTT	:::::::::0::12:14:14:30:32:34::51:::
222	TGTGCCAGCAGCGAGGGCATCTCCTACAATGAGCAGTTCTTC	TRBV9	TRBD2	TRBJ2-1	TRBV9*00	TRBJ2	CASSEGISYNEQFF	TGTGCCAGCAGCGAGGGCATCTCCTACAATGAGCAGTTCTTC	:::::::::0::13:13::17:18:20:20:42:::
223	TGTGCCAGCAGCGAGGGGACTAACTACAATGAGCAGTTCTTC	TRBV9	TRBD2	TRBJ2-1	TRBV9*00	TRBJ2	CASSEGTNYNEQFF	TGTGCCAGCAGCGAGGGGACTAACTACAATGAGCAGTTCTTC	:::::::::0::13:15:15::22:23::42:::
224	TGTGCCAGCAGCGATGGGACAAACTCCTACGAGCAGTACTTC	TRBV11-2	TRBD1	TRBJ2-7	TRBV11	TRBJ2	CASSDGTNSYEQYF	TGTGCCAGCAGCGATGGGACAAACTCCTACGAGCAGTACTTC	:::::::::0::12:15:15::21:23:23:42:::
225	TGTGCCAGCAGCGCAGGGACAGGGTCCTACGAGCAGTACTTC	TRBV9	TRBD1	TRBJ2-7	TRBV9*00	TRBJ2	CASSAGTGSYEQYF	TGTGCCAGCAGCGCAGGGACAGGGTCCTACGAGCAGTACTTC	:::::::::0:16:16:16:::24:24::42:::
226	TGTGCCAGCAGCGCCGGGACAGGGGCCTACGAGCAGTACTTC	TRBV9	TRBD1	TRBJ2-7	TRBV9*00	TRBJ2	CASSAGTGAYEQYF	TGTGCCAGCAGCGCCGGGACAGGGGCCTACGAGCAGTACTTC	:::::::::0::13:13:15::25:25::42:::
227	TGTGCCAGCAGCGCCGGGACAGGGTCGTACGAGCAGTACTTC	TRBV9	TRBD1	TRBJ2-7	TRBV9	TRBJ2	CASSAGTGSYEQYF	TGTGCCAGCAGCGCCGGGACAGGGTCGTACGAGCAGTACTTC	:::::::::0:-3:13:13:2:-3:24:27:-4:42:::
228	TGTGCCAGCAGCGCCGGGACGGTCTCCTACGAGCAGTACTTC	TRBV9	TRBD1	TRBJ2-7	TRBV9	TRBJ2	CASSAGTVSYEQYF	TGTGCCAGCAGCGCCGGGACGGTCTCCTACGAGCAGTACTTC	:::::::::0:-3:13:13:2:-7:20:23:0:42:::
229	TGTGCCAGCAGCGCCGGGACTAGCTACGAGCAGTACTTC	TRBV9	TRBD2	TRBJ2-7	TRBV9	TRBJ2	CASSAGTSYEQYF	TGTGCCAGCAGCGCCGGGACTAGCTACGAGCAGTACTTC	:::::::::0:-3:13:13:2:-8:23:23:-3:39:::
230	TGTGCCAGCAGCGCCGGGGGGGTTTCCTACAATGAGCAGTTCTTC	TRBV9	TRBD1	TRBJ2-1	TRBV9	TRBJ2	CASSAGGVSYNEQFF	TGTGCCAGCAGCGCCGGGGGGGTTTCCTACAATGAGCAGTTCTTC	:::::::::0:-3:13:13:2:-9:18:24:-1:45:::
231	TGTGCCAGCAGCGCGACTAGCGGGGGGGTTGTACATACGCAGTATTTT	TRBV7-6	TRBD2	TRBJ2-3	TRBV7	TRBJ2	CASSATSGGVVHTQYF	TGTGCCAGCAGCGCGACTAGCGGGGGGGTTGTACATACGCAGTATTTT	:::::::::0:-5:12:14:-2:0:28:34:-7:48:::
232	TGTGCCAGCAGCGCGACTAGCGGGGGGGTTGTAGATACGCAGTATTTT	TRBV7-6	TRBD2	TRBJ2-3	TRBV7	TRBJ2	CASSATSGGVVDTQYF	TGTGCCAGCAGCGCGACTAGCGGGGGGGTTGTAGATACGCAGTATTTT	:::::::::0:-5:12:14:-2:0:28:32:-5:48:::
233	TGTGCCAGCAGCGCGGACCAACTCACAGATACGCAGTATTTT	TRBV9		TRBJ2-3	TRBV9	TRBJ2	CASSADQLTDTQYF	TGTGCCAGCAGCGCGGACCAACTCACAGATACGCAGTATTTT	:::::::::0:-3:13:::::23:-2:42:::
234	TGTGCCAGCAGCGCGGCTAGCGGGGGGGCGTACGAGCAGTACTTC	TRBV9	TRBD2	TRBJ2-7	TRBV9*00	TRBJ2	CASSAASGGAYEQYF	TGTGCCAGCAGCGCGGCTAGCGGGGGGGCGTACGAGCAGTACTTC	:::::::::0:16:19:19::28:29:30::45:::
235	TGTGCCAGCAGCGCGGGACAGGAGGCTTACGAGCAGTACTTC	TRBV9	TRBD1	TRBJ2-7	TRBV9	TRBJ2	CASSAGQEAYEQYF	TGTGCCAGCAGCGCGGGACAGGAGGCTTACGAGCAGTACTTC	:::::::::0:-3:13:13:1:0:26:27:-4:42:::
236	TGTGCCAGCAGCGCGGGCGGGGTCCCCTACAATGAGCAGTTCTTC	TRBV9	TRBD2	TRBJ2-1	TRBV9*00	TRBJ2	CASSAGGVPYNEQFF	TGTGCCAGCAGCGCGGGCGGGGTCCCCTACAATGAGCAGTTCTTC	:::::::::0::13:13::21:21:25::45:::
237	TGTGCCAGCAGCGCTCAAGGGACAGGATATGAAAAACTGTTTTTT	TRBV9	TRBD1	TRBJ1-4	TRBV9	TRBJ1	CASSAQGTGYEKLFF	TGTGCCAGCAGCGCTCAAGGGACAGGATATGAAAAACTGTTTTTT	:::::::::0:-3:13:18:0:-4:26:28:-6:45:::
238	TGTGCCAGCAGCGGACAGGGGGCCTACGAGCAGTACTTC	TRBV6-5	TRBD1	TRBJ2-7	TRBV6	TRBJ2	CASSGQGAYEQYF	TGTGCCAGCAGCGGACAGGGGGCCTACGAGCAGTACTTC	:::::::::0::11:12:::22:22::39:::
239	TGTGCCAGCAGCGGAGCAGGGACCGGGTACGAGCAGTACTTC	TRBV9	TRBD1	TRBJ2-7	TRBV9*00	TRBJ2	CASSGAGTGYEQYF	TGTGCCAGCAGCGGAGCAGGGACCGGGTACGAGCAGTACTTC	:::::::::0:16:17:18:18::27:27::42:::
240	TGTGCCAGCAGCGGAGCAGGGACCGGGTACGGGCAGTACTTC	TRBV9	TRBD1	TRBJ2-7	TRBV9	TRBJ2	CASSGAGTGYGQYF	TGTGCCAGCAGCGGAGCAGGGACCGGGTACGGGCAGTACTTC	:::::::::0:1:17:18:0:-3:27:27:-4:42:::
241	TGTGCCAGCAGCGGGGGGGCACCCTCCTACGAGCAGTACTTC	TRBV9	TRBD1	TRBJ2-7	TRBV9	TRBJ2	CASSGGAPSYEQYF	TGTGCCAGCAGCGGGGGGGCACCCTCCTACGAGCAGTACTTC	:::::::::0:-3:13:14:-6:0:20:23:0:42:::
242	TGTGCCAGCAGCGGGGGGGCCCCCTACAATGAGCAGTTCTTC	TRBV9	TRBD1	TRBJ2-1	TRBV9*00	TRBJ2	CASSGGAPYNEQFF	TGTGCCAGCAGCGGGGGGGCCCCCTACAATGAGCAGTTCTTC	:::::::::0::13:13::18:22:22::42:::
243	TGTGCCAGCAGCGGGGGGGTCCCCTACAATGAGCAGTTCTTC	TRBV9	TRBD1	TRBJ2-1	TRBV9	TRBJ2	CASSGGVPYNEQFF	TGTGCCAGCAGCGGGGGGGTCCCCTACAATGAGCAGTTCTTC	:::::::::0:-3:13:13:-6:-1:18:22:-2:42:::
244	TGTGCCAGCAGCGGGGGGGTCTCCTACAATGAGCAGTTCTTC	TRBV9	TRBD1	TRBJ2-1	TRBV9*00	TRBJ2	CASSGGVSYNEQFF	TGTGCCAGCAGCGGGGGGGTCTCCTACAATGAGCAGTTCTTC	:::::::::0::13:13:::18:20:20:42:::
245	TGTGCCAGCAGCGTAAAAGTGATCGGGGAGCTGTTTTTT	TRBV9		TRBJ2-2	TRBV9	TRBJ2	CASSVKVIGELFF	TGTGCCAGCAGCGTAAAAGTGATCGGGGAGCTGTTTTTT	:::::::::0:-1:15:::::23:-7:39:::
246	TGTGCCAGCAGCGTAAGCGGGGGAGCTTACGAGCAGTACTTC	TRBV9	TRBD2	TRBJ2-7	TRBV9*00	TRBJ2	CASSVSGGAYEQYF	TGTGCCAGCAGCGTAAGCGGGGGAGCTTACGAGCAGTACTTC	:::::::::0::15:15:::21:21:25:42:::
247	TGTGCCAGCAGCGTAGACGGGGTCTCCTACAATGAGCAGTTCTTC	TRBV9		TRBJ2-1	TRBV9	TRBJ2	CASSVDGVSYNEQFF	TGTGCCAGCAGCGTAGACGGGGTCTCCTACAATGAGCAGTTCTTC	:::::::::0:0:16:::::23:0:45:::
248	TGTGCCAGCAGCGTAGAGGGGGCCCCCTACAATGAGCAGTTCTTC	TRBV9	TRBD1	TRBJ2-1	TRBV9	TRBJ2	CASSVEGAPYNEQFF	TGTGCCAGCAGCGTAGAGGGGGCCCCCTACAATGAGCAGTTCTTC	:::::::::0:0:16:16:-5:0:23:25:-2:45:::
249	TGTGCCAGCAGCGTAGATGGCCAGTCCTACAATGAGCAGTTCTTC	TRBV9		TRBJ2-1	TRBV9	TRBJ2	CASSVDGQSYNEQFF	TGTGCCAGCAGCGTAGATGGCCAGTCCTACAATGAGCAGTTCTTC	:::::::::0:0:16:::::24:-1:45:::
250	TGTGCCAGCAGCGTAGCCGCAGGGGCGAGCTATGGCTACACCTTC	TRBV9	TRBD1	TRBJ1-2	TRBV9*00	TRBJ1	CASSVAAGASYGYTF	TGTGCCAGCAGCGTAGCCGCAGGGGCGAGCTATGGCTACACCTTC	:::::::::0:16:17:19:::25:29::45:::
251	TGTGCCAGCAGCGTAGCGGCCGAATCCTACGAGCAGTACGTC	TRBV9		TRBJ2-7	TRBV9	TRBJ2	CASSVAAESYEQYV	TGTGCCAGCAGCGTAGCGGCCGAATCCTACGAGCAGTACGTC	:::::::::0:1:17:::::24:-1:42:::
252	TGTGCCAGCAGCGTAGCTAGCGGTCCCTACGAGCAGTACTTC	TRBV9		TRBJ2-7	TRBV9	TRBJ2	CASSVASGPYEQYF	TGTGCCAGCAGCGTAGCTAGCGGTCCCTACGAGCAGTACTTC	:::::::::0:3:19:::::25:-2:42:::
253	TGTGCCAGCAGCGTAGCTGCCGCGGGGGGCTACGAGCAGTACTTC	TRBV9	TRBD1	TRBJ2-7	TRBV9	TRBJ2	CASSVAAAGGYEQYF	TGTGCCAGCAGCGTAGCTGCCGCGGGGGGCTACGAGCAGTACTTC	:::::::::0:2:18:23:-6:-1:28:29:-3:45:::
254	TGTGCCAGCAGCGTAGGAGGAGTCCCCTACAATGAGCAGTTCTTC	TRBV9	TRBD2	TRBJ2-1	TRBV9	TRBJ2	CASSVGGVPYNEQFF	TGTGCCAGCAGCGTAGGAGGAGTCCCCTACAATGAGCAGTTCTTC	:::::::::0:0:16:20:6:-17:25:25:-2:45:::
255	TGTGCCAGCAGCGTAGGAGGATCCCCCTACAATGAGCAGTTCTTC	TRBV9		TRBJ2-1	TRBV9*00	TRBJ2	CASSVGGSPYNEQFF	TGTGCCAGCAGCGTAGGAGGATCCCCCTACAATGAGCAGTTCTTC	:::::::::0:16:16:::::25::45:::
256	TGTGCCAGCAGCGTAGGAGGGGTCTCCTACAATGAGCAGTTCTTC	TRBV9	TRBD1	TRBJ2-1	TRBV9*00	TRBJ2	CASSVGGVSYNEQFF	TGTGCCAGCAGCGTAGGAGGGGTCTCCTACAATGAGCAGTTCTTC	:::::::::0:16:16:17:::22:23:23:45:::
257	TGTGCCAGCAGCGTAGGCGGGGCTCCATACAATGAGCAGTTCTTC	TRBV9		TRBJ2-1	TRBV9*00	TRBJ2	CASSVGGAPYNEQFF	TGTGCCAGCAGCGTAGGCGGGGCTCCATACAATGAGCAGTTCTTC	:::::::::0:16:16:::::18:22:45:::
258	TGTGCCAGCAGCGTAGGCGGGGTATCCTACAATGAGCAGTTCTTC	TRBV9	TRBD2	TRBJ2-1	TRBV9*00	TRBJ2	CASSVGGVSYNEQFF	TGTGCCAGCAGCGTAGGCGGGGTATCCTACAATGAGCAGTTCTTC	:::::::::0:16:16:16:::21:24::45:::
259	TGTGCCAGCAGCGTAGGGACAGGGGCTAATTCACCCCTCCACTTT	TRBV9	TRBD1	TRBJ1-6	TRBV9	TRBJ1	CASSVGTGANSPLHF	TGTGCCAGCAGCGTAGGGACAGGGGCTAATTCACCCCTCCACTTT	:::::::::0:0:16:16:-1:-2:25:26:-6:45:::
260	TGTGCCAGCAGCGTAGGGGGGGTTCCTTACAATGAGCAGTTCTTC	TRBV9	TRBD1	TRBJ2-1	TRBV9	TRBJ2	CASSVGGVPYNEQFF	TGTGCCAGCAGCGTAGGGGGGGTTCCTTACAATGAGCAGTTCTTC	:::::::::0:0:16:16:-6:-1:21:27:-4:45:::
261	TGTGCCAGCAGCGTAGGTGGAGGGGCCCAGGGCGGTGGGTTCTTC	TRBV9	TRBD2	TRBJ2-1	TRBV9	TRBJ2	CASSVGGGAQGGGFF	TGTGCCAGCAGCGTAGGTGGAGGGGCCCAGGGCGGTGGGTTCTTC	:::::::::0:0:16:18:-10:0:24:38:-15:45:::
262	TGTGCCAGCAGCGTAGGTGGGGTCTCCTACAATGAGCAGTTCTTC	TRBV9		TRBJ2-1	TRBV9*00	TRBJ2	CASSVGGVSYNEQFF	TGTGCCAGCAGCGTAGGTGGGGTCTCCTACAATGAGCAGTTCTTC	:::::::::0:16:16:::::23:23:45:::
263	TGTGCCAGCAGCGTATGCGGGGCTCCATACAATGAGCAGTTCTTC	TRBV9	TRBD2	TRBJ2-1	TRBV9	TRBJ2	CASSVCGAPYNEQFF	TGTGCCAGCAGCGTATGCGGGGCTCCATACAATGAGCAGTTCTTC	:::::::::0:-1:15:16:-7:-4:21:21:1:45:::
264	TGTGCCAGCAGCGTCCTGGACGGGTCCTCCTACGAGCAGTACTTC	TRBV27		TRBJ2-7	TRBV27	TRBJ2	CASSVLDGSSYEQYF	TGTGCCAGCAGCGTCCTGGACGGGTCCTCCTACGAGCAGTACTTC	:::::::::0:-6:11:::::26:0:45:::
265	TGTGCCAGCAGCGTCGACGAGGGGGGGTACAATGAGCAGTTCTTC	TRBV9	TRBD1	TRBJ2-1	TRBV9	TRBJ2	CASSVDEGGYNEQFF	TGTGCCAGCAGCGTCGACGAGGGGGGGTACAATGAGCAGTTCTTC	:::::::::0:-2:14:19:-5:-1:25:27:-4:45:::
266	TGTGCCAGCAGCGTCGACGGGGGGGGGTACAATGAGCAGTTCTTC	TRBV9	TRBD1	TRBJ2-1	TRBV9	TRBJ2	CASSVDGGGYNEQFF	TGTGCCAGCAGCGTCGACGGGGGGGGGTACAATGAGCAGTTCTTC	:::::::::0:-2:14:15:-2:-1:24:27:-4:45:::
267	TGTGCCAGCAGCGTCGACTGGGTGGCCTACAATGAGCAGTTCTTC	TRBV9		TRBJ2-1	TRBV9	TRBJ2	CASSVDWVAYNEQFF	TGTGCCAGCAGCGTCGACTGGGTGGCCTACAATGAGCAGTTCTTC	:::::::::0:-2:14:::::25:-2:45:::
268	TGTGCCAGCAGCGTCGGCGGGACAGGGTTCAACGAGCAGTACTTC	TRBV5-5	TRBD1	TRBJ2-7	TRBV5	TRBJ2	CASSVGGTGFNEQYF	TGTGCCAGCAGCGTCGGCGGGACAGGGTTCAACGAGCAGTACTTC	:::::::::0:-4:12:17:1:-3:27:31:-5:45:::
269	TGTGCCAGCAGCGTGGGCGGGGGGGCCTACGAGCAGTACTTC	TRBV9	TRBD2	TRBJ2-7	TRBV9	TRBJ2	CASSVGGGAYEQYF	TGTGCCAGCAGCGTGGGCGGGGGGGCCTACGAGCAGTACTTC	:::::::::0:-2:14:16:-7:0:25:25:-2:42:::
270	TGTGCCAGCAGCGTGGGGGGGGTGAACTACAATGAGCAGTTCTTC	TRBV9	TRBD1	TRBJ2-1	TRBV9	TRBJ2	CASSVGGVNYNEQFF	TGTGCCAGCAGCGTGGGGGGGGTGAACTACAATGAGCAGTTCTTC	:::::::::0:-2:14:14:-6:-1:19:26:-3:45:::
271	TGTGCCAGCAGCGTTGGGACAGGGGCCTACGAGCAGTACTTC	TRBV9	TRBD1	TRBJ2-7	TRBV9*00	TRBJ2	CASSVGTGAYEQYF	TGTGCCAGCAGCGTTGGGACAGGGGCCTACGAGCAGTACTTC	:::::::::0::14:15:15::25:25::42:::
272	TGTGCCAGCAGCGTTGGGGGAGTCCCCTACAATGAGCAGTTCTTC	TRBV9		TRBJ2-1	TRBV9*00	TRBJ2	CASSVGGVPYNEQFF	TGTGCCAGCAGCGTTGGGGGAGTCCCCTACAATGAGCAGTTCTTC	:::::::::0::14:::::18:23:45:::
273	TGTGCCAGCAGCGTTTCAGGGGGCGCGAACGGGGAGCTGTTTTTT	TRBV9	TRBD1	TRBJ2-2	TRBV9*00	TRBJ2	CASSVSGGANGELFF	TGTGCCAGCAGCGTTTCAGGGGGCGCGAACGGGGAGCTGTTTTTT	:::::::::0::14:16::24:26:29::45:::
274	TGTGCCAGCAGCTACGTTGGTAGAGAAGCTTTCTTT	TRBV11-2		TRBJ1-1	TRBV11	TRBJ1	CASSYVGREAFF	TGTGCCAGCAGCTACGTTGGTAGAGAAGCTTTCTTT	:::::::::0::13:::::24::36:::
275	TGTGCCAGCAGCTCAGGGACAGTCTCCTACGAGCAGTACTTC	TRBV6-2	TRBD1	TRBJ2-7	TRBV6	TRBJ2	CASSSGTVSYEQYF	TGTGCCAGCAGCTCAGGGACAGTCTCCTACGAGCAGTACTTC	:::::::::0::11:15:15::22:23:23:42:::
276	TGTGCCAGCAGCTCCATTTTGTCAGATACGCAGTATTTT	TRBV7-6		TRBJ2-3	TRBV7	TRBJ2	CASSSILSDTQYF	TGTGCCAGCAGCTCCATTTTGTCAGATACGCAGTATTTT	:::::::::0:-4:13:::::22:-4:39:::
277	TGTGCCAGCAGCTCCGGAGGCGTCTACGAGCAGTACTTC	TRBV7-8	TRBD2	TRBJ2-7	TRBV7	TRBJ2	CASSSGGVYEQYF	TGTGCCAGCAGCTCCGGAGGCGTCTACGAGCAGTACTTC	:::::::::0::13:15:::20:23::39:::
278	TGTGCCAGCAGCTCCGGGACAGTCGCCTACGAGCAGTACTTC	TRBV9	TRBD1	TRBJ2-7	TRBV9	TRBJ2	CASSSGTVAYEQYF	TGTGCCAGCAGCTCCGGGACAGTCGCCTACGAGCAGTACTTC	:::::::::0:-4:12:13:2:-5:22:25:-2:42:::
279	TGTGCCAGCAGCTCCGGGATCTATGGCTACACCTTC	TRBV3-2		TRBJ1-2	TRBV3	TRBJ1	CASSSGIYGYTF	TGTGCCAGCAGCTCCGGGATCTATGGCTACACCTTC	:::::::::0:19:28:::::20::36:::
280	TGTGCCAGCAGCTCGAGGGACACCTATGGCTACACCTTC	TRBV6-5	TRBD1	TRBJ1-2	TRBV6	TRBJ1	CASSSRDTYGYTF	TGTGCCAGCAGCTCGAGGGACACCTATGGCTACACCTTC	:::::::::0::11:16:16::22:23::39:::
281	TGTGCCAGCAGCTCTGCCCGGGCCTACGAGCAGTACTTC	TRBV12-4	TRBD1	TRBJ2-7	TRBV12	TRBJ2	CASSSARAYEQYF	TGTGCCAGCAGCTCTGCCCGGGCCTACGAGCAGTACTTC	:::::::::0:-6:11:16:3:-9:22:22:-2:39:::
282	TGTGCCAGCAGCTCTGCCGGGGCCTACGAGCAGTACTTC	TRBV6-2	TRBD1	TRBJ2-7	TRBV6	TRBJ2	CASSSAGAYEQYF	TGTGCCAGCAGCTCTGCCGGGGCCTACGAGCAGTACTTC	:::::::::0::11:16:18::21:22::39:::
283	TGTGCCAGCAGCTGGCAAGGGGCGGCCGGGGAGCTGTTTTTT	TRBV13	TRBD1	TRBJ2-2	TRBV13	TRBJ2	CASSWQGAAGELFF	TGTGCCAGCAGCTGGCAAGGGGCGGCCGGGGAGCTGTTTTTT	:::::::::0:-4:13:18:-7:1:24:25:-6:42:::
284	TGTGCCAGCAGCTTAACGGGCTCCTACGAGCAGTACGTC	TRBV11-2		TRBJ2-7	TRBV11	TRBJ2	CASSLTGSYEQYV	TGTGCCAGCAGCTTAACGGGCTCCTACGAGCAGTACGTC	:::::::::0::15:::::19:20:39:::
285	TGTGCCAGCAGCTTAACTGGGCAGGGTAAGTTCTTC	TRBV7-2	TRBD1	TRBJ2-1	TRBV7	TRBJ2	CASSLTGQGKFF	TGTGCCAGCAGCTTAACTGGGCAGGGTAAGTTCTTC	:::::::::0::15:18:18::26:28::36:::
286	TGTGCCAGCAGCTTACCCCAGGGGGAGGGCTACGAGCAGTACTTC	TRBV11-2	TRBD1	TRBJ2-7	TRBV11	TRBJ2	CASSLPQGEGYEQYF	TGTGCCAGCAGCTTACCCCAGGGGGAGGGCTACGAGCAGTACTTC	:::::::::0:-2:15:18:-4:-1:25:29:-3:45:::
287	TGTGCCAGCAGCTTACCGAACACTGAAGCTTTCTTT	TRBV7-9		TRBJ1-1	TRBV7	TRBJ1	CASSLPNTEAFF	TGTGCCAGCAGCTTACCGAACACTGAAGCTTTCTTT	:::::::::0:-2:15:::::17:-1:36:::
288	TGTGCCAGCAGCTTAGAAGTTAGCGGGGGTGGGGAGCAGTACGTC	TRBV11-2	TRBD2	TRBJ2-7	TRBV11	TRBJ2	CASSLEVSGGGEQYV	TGTGCCAGCAGCTTAGAAGTTAGCGGGGGTGGGGAGCAGTACGTC	:::::::::0:0:17:20:-5:-4:27:33:-7:45:::
289	TGTGCCAGCAGCTTAGACCCCGGAGACTACGAGCAGTACGTC	TRBV7-2	TRBD1	TRBJ2-7	TRBV7	TRBJ2	CASSLDPGDYEQYV	TGTGCCAGCAGCTTAGACCCCGGAGACTACGAGCAGTACGTC	:::::::::0:-1:16:18:3:-10:23:26:-3:42:::
290	TGTGCCAGCAGCTTAGAGCGGGGGCCATACTACGAGCAGTACTTC	TRBV7-6	TRBD1	TRBJ2-7	TRBV7	TRBJ2	CASSLERGPYYEQYF	TGTGCCAGCAGCTTAGAGCGGGGGCCATACTACGAGCAGTACTTC	:::::::::0:17:19:19::25:25:29::45:::
291	TGTGCCAGCAGCTTAGCGCAAGGTAGCTACGAGCAGTACTTC	TRBV7-6		TRBJ2-7	TRBV7	TRBJ2	CASSLAQGSYEQYF	TGTGCCAGCAGCTTAGCGCAAGGTAGCTACGAGCAGTACTTC	:::::::::0:17:22:::::26::42:::
292	TGTGCCAGCAGCTTAGCGGCCGGGAACACTGAAGCTTTCTTT	TRBV7-9		TRBJ1-1	TRBV7	TRBJ1	CASSLAAGNTEAFF	TGTGCCAGCAGCTTAGCGGCCGGGAACACTGAAGCTTTCTTT	:::::::::0:1:18:::::23:-1:42:::
293	TGTGCCAGCAGCTTAGCGTATGGACCAGCCTACGAGCAGTACTTC	TRBV11-1		TRBJ2-7	TRBV11	TRBJ2	CASSLAYGPAYEQYF	TGTGCCAGCAGCTTAGCGTATGGACCAGCCTACGAGCAGTACTTC	:::::::::0:17:18:::::28::45:::
294	TGTGCCAGCAGCTTAGCTGGGGCGCAGGGCTACACCTTC	TRBV7-6	TRBD1	TRBJ1-2	TRBV7	TRBJ1	CASSLAGAQGYTF	TGTGCCAGCAGCTTAGCTGGGGCGCAGGGCTACACCTTC	:::::::::0:17:17:18::23:25:27::39:::
295	TGTGCCAGCAGCTTAGGACTAGTCTACGAGCAGTACTTC	TRBV11-2	TRBD2	TRBJ2-7	TRBV11	TRBJ2	CASSLGLVYEQYF	TGTGCCAGCAGCTTAGGACTAGTCTACGAGCAGTACTTC	:::::::::0::16:16:::22:23::39:::
296	TGTGCCAGCAGCTTAGTACCGCCAGGCCTCAATCAGCCCCAGCATTTT	TRBV7-6		TRBJ1-5	TRBV7	TRBJ1	CASSLVPPGLNQPQHF	TGTGCCAGCAGCTTAGTACCGCCAGGCCTCAATCAGCCCCAGCATTTT	:::::::::0:-1:16:::::29:-3:48:::
297	TGTGCCAGCAGCTTAGTAGCGGGGGGGCCCAATGAGCAGTTCTTC	TRBV7-3	TRBD2	TRBJ2-1	TRBV7	TRBJ2	CASSLVAGGPNEQFF	TGTGCCAGCAGCTTAGTAGCGGGGGGGCCCAATGAGCAGTTCTTC	:::::::::0:-2:15:16:-5:2:29:29:-6:45:::
298	TGTGCCAGCAGCTTAGTGGGCTACGAGCAGTACTTC	TRBV7-8		TRBJ2-7	TRBV7	TRBJ2	CASSLVGYEQYF	TGTGCCAGCAGCTTAGTGGGCTACGAGCAGTACTTC	:::::::::0:-1:16:::::20:-3:36:::
299	TGTGCCAGCAGCTTCGGGATCCCCTACGAGCAGTACTTC	TRBV7-6	TRBD1	TRBJ2-7	TRBV7	TRBJ2	CASSFGIPYEQYF	TGTGCCAGCAGCTTCGGGATCCCCTACGAGCAGTACTTC	:::::::::0:-3:14:14:1:-8:19:22:-2:39:::
300	TGTGCCAGCAGCTTCGGGGGCCTCCAAGAGACCCAGTACTTC	TRBV5-6	TRBD1	TRBJ2-5	TRBV5	TRBJ2	CASSFGGLQETQYF	TGTGCCAGCAGCTTCGGGGGCCTCCAAGAGACCCAGTACTTC	:::::::::0:-2:14:15:-6:0:21:23:-1:42:::
301	TGTGCCAGCAGCTTGACCGGGACAGGGTACGAAAAACTGTTTTTT	TRBV9	TRBD1	TRBJ1-4	TRBV9	TRBJ1	CASSLTGTGYEKLFF	TGTGCCAGCAGCTTGACCGGGACAGGGTACGAAAAACTGTTTTTT	:::::::::0:-4:12:16:2:-3:27:30:-8:45:::
302	TGTGCCAGCAGCTTGATGGTCCCTAGCGGGTTCCAAGAGACCCAGTACTTC	TRBV5-6	TRBD2	TRBJ2-5	TRBV5	TRBJ2	CASSLMVPSGFQETQYF	TGTGCCAGCAGCTTGATGGTCCCTAGCGGGTTCCAAGAGACCCAGTACTTC	:::::::::0:-1:15:22:-4:-6:28:28:3:51:::
303	TGTGCCAGCAGCTTGGATGGGACTTCGTATAATGAGCAGTTCTTC	TRBV5-5	TRBD2	TRBJ2-1	TRBV5	TRBJ2	CASSLDGTSYNEQFF	TGTGCCAGCAGCTTGGATGGGACTTCGTATAATGAGCAGTTCTTC	:::::::::0:0:16:18:0:-10:24:30:-7:45:::
304	TGTGCCAGCAGCTTGGGCGTGACCACCGGGGAGCTGTTTTTT	TRBV5-6		TRBJ2-2	TRBV5	TRBJ2	CASSLGVTTGELFF	TGTGCCAGCAGCTTGGGCGTGACCACCGGGGAGCTGTTTTTT	:::::::::0:0:16:::::23:-4:42:::
305	TGTGCCAGCAGCTTGGGGGGAGCTCCCTACAATGAGCAGTCCTTC	TRBV7-2		TRBJ2-1	TRBV7	TRBJ2	CASSLGGAPYNEQSF	TGTGCCAGCAGCTTGGGGGGAGCTCCCTACAATGAGCAGTCCTTC	:::::::::0:-3:14:::::18:4:45:::
306	TGTGCCAGCAGCTTGGGGGGAGCTCCCTACAATGAGCAGTTCCTC	TRBV7-2		TRBJ2-1	TRBV7	TRBJ2	CASSLGGAPYNEQFL	TGTGCCAGCAGCTTGGGGGGAGCTCCCTACAATGAGCAGTTCCTC	:::::::::0:-3:14:::::18:4:45:::
307	TGTGCCAGCAGCTTGGGGGGAGCTCCCTACAATGAGCAGTTCTTC	TRBV7-2		TRBJ2-1	TRBV7	TRBJ2	CASSLGGAPYNEQFF	TGTGCCAGCAGCTTGGGGGGAGCTCCCTACAATGAGCAGTTCTTC	:::::::::0:-3:14:::::18:4:45:::
308	TGTGCCAGCAGCTTGGGTATCGGGCCCCTCCACTTT	TRBV5-6		TRBJ1-6	TRBV5	TRBJ1	CASSLGIGPLHF	TGTGCCAGCAGCTTGGGTATCGGGCCCCTCCACTTT	:::::::::0:16:16:::::24::36:::
309	TGTGCCAGCAGGAAGGGACAGAACCAAGGCTACACCTTC	TRBV7-9	TRBD1	TRBJ1-2	TRBV7	TRBJ1	CASRKGQNQGYTF	TGTGCCAGCAGGAAGGGACAGAACCAAGGCTACACCTTC	:::::::::0:-6:11:14:0:-5:21:27:-8:39:::
310	TGTGCCAGCAGGACGATAGCGGTCGCCTACGAGCAGTACTTC	TRBV6-1	TRBD2	TRBJ2-7	TRBV6	TRBJ2	CASRTIAVAYEQYF	TGTGCCAGCAGGACGATAGCGGTCGCCTACGAGCAGTACTTC	:::::::::0::11:16:::22:25::42:::
311	TGTGCCAGCAGGGAAGGACAGGGTAATTCACCCCTCCACTTT	TRBV27	TRBD1	TRBJ1-6	TRBV27	TRBJ1	CASREGQGNSPLHF	TGTGCCAGCAGGGAAGGACAGGGTAATTCACCCCTCCACTTT	:::::::::0:-6:11:15:-1:-3:23:23:-6:42:::
312	TGTGCCAGCAGGGGGGGACAGGGCTACGAGCAGTACTTC	TRBV27	TRBD1	TRBJ2-7	TRBV27*00	TRBJ2	CASRGGQGYEQYF	TGTGCCAGCAGGGGGGGACAGGGCTACGAGCAGTACTTC	:::::::::0::11:14:14::23:23::39:::
313	TGTGCCAGCAGTACCCTCGAAGGGGGCCCCTATGGCTACACCTTC	TRBV6-1	TRBD1	TRBJ1-2	TRBV6	TRBJ1	CASSTLEGGPYGYTF	TGTGCCAGCAGTACCCTCGAAGGGGGCCCCTATGGCTACACCTTC	:::::::::0::12:20::27:27:29::45:::
314	TGTGCCAGCAGTACCGCCATAGGCGGCTATGGCTACACCTTC	TRBV6-6		TRBJ1-2	TRBV6	TRBJ1	CASSTAIGGYGYTF	TGTGCCAGCAGTACCGCCATAGGCGGCTATGGCTACACCTTC	:::::::::0::12:::::26::42:::
315	TGTGCCAGCAGTACCGGGACAGGGGCCAATCAGCCCCAGCATTTT	TRBV28	TRBD1	TRBJ1-5	TRBV28	TRBJ1	CASSTGTGANQPQHF	TGTGCCAGCAGTACCGGGACAGGGGCCAATCAGCCCCAGCATTTT	:::::::::0:-5:12:13:2:-2:25:26:-3:45:::
316	TGTGCCAGCAGTACGGAACACTCTGGGGCCAACGTCCTGACTTTC	TRBV6-5		TRBJ2-6	TRBV6	TRBJ2	CASSTEHSGANVLTF	TGTGCCAGCAGTACGGAACACTCTGGGGCCAACGTCCTGACTTTC	:::::::::0:-5:12:::::20:0:45:::
317	TGTGCCAGCAGTAGCGGGGGTTCCTACGAGCAGTACTTC	TRBV6-2	TRBD2	TRBJ2-7	TRBV6	TRBJ2	CASSSGGSYEQYF	TGTGCCAGCAGTAGCGGGGGTTCCTACGAGCAGTACTTC	:::::::::0:-5:12:12:-6:-4:18:21:-1:39:::
318	TGTGCCAGCAGTCAAGGGACAGTGTCCTACGAGCAGTACTTC	TRBV6-2	TRBD1	TRBJ2-7	TRBV6	TRBJ2	CASSQGTVSYEQYF	TGTGCCAGCAGTCAAGGGACAGTGTCCTACGAGCAGTACTTC	:::::::::0::12:15:15::22:24::42:::
319	TGTGCCAGCAGTCACGGGGATTCCTACGAGCAGTACGTC	TRBV28		TRBJ2-7	TRBV28	TRBJ2	CASSHGDSYEQYV	TGTGCCAGCAGTCACGGGGATTCCTACGAGCAGTACGTC	:::::::::0:-5:12:::::21:-1:39:::
320	TGTGCCAGCAGTCACGGGGATTCCTACGAGCAGTACTTC	TRBV28		TRBJ2-7	TRBV28	TRBJ2	CASSHGDSYEQYF	TGTGCCAGCAGTCACGGGGATTCCTACGAGCAGTACTTC	:::::::::0:-5:12:::::21:-1:39:::
321	TGTGCCAGCAGTCACGGGGCTTCCTACGAGCAGTACGTC	TRBV28	TRBD1	TRBJ2-7	TRBV28*00	TRBJ2	CASSHGASYEQYV	TGTGCCAGCAGTCACGGGGCTTCCTACGAGCAGTACGTC	:::::::::0::12:12::20:20:21::39:::
322	TGTGCCAGCAGTCCAGGGGGCGGGCAGCCCCAGCATTTT	TRBV12-3	TRBD1	TRBJ1-5	TRBV12	TRBJ1	CASSPGGGQPQHF	TGTGCCAGCAGTCCAGGGGGCGGGCAGCCCCAGCATTTT	:::::::::0::12:13::21:22:24::39:::
323	TGTGCCAGCAGTCCCAATCAGCCCCAGCATTTT	TRBV28		TRBJ1-5	TRBV28	TRBJ1	CASSPNQPQHF	TGTGCCAGCAGTCCCAATCAGCCCCAGCATTTT	:::::::::0:-5:12:::::14:-3:33:::
324	TGTGCCAGCAGTCCCCAAGGCGGGTACGAGCAGTACTTC	TRBV6-2	TRBD2	TRBJ2-7	TRBV6	TRBJ2	CASSPQGGYEQYF	TGTGCCAGCAGTCCCCAAGGCGGGTACGAGCAGTACTTC	:::::::::0::12:19:::24:24::39:::
325	TGTGCCAGCAGTCCCCAGGGGACAGGGGCATACGAGCAGTACTTC	TRBV12-4	TRBD1	TRBJ2-7	TRBV12	TRBJ2	CASSPQGTGAYEQYF	TGTGCCAGCAGTCCCCAGGGGACAGGGGCATACGAGCAGTACTTC	:::::::::0::12:18:18::28:30::45:::
326	TGTGCCAGCAGTCCCGGACAGGCCTACGAGCAGTACGTC	TRBV6-1	TRBD1	TRBJ2-7	TRBV6	TRBJ2	CASSPGQAYEQYV	TGTGCCAGCAGTCCCGGACAGGCCTACGAGCAGTACGTC	:::::::::0::12:12:15::22:22::39:::
327	TGTGCCAGCAGTCCCGGACCTGGAAACACCATATATTTT	TRBV6-5	TRBD1	TRBJ1-3	TRBV6	TRBJ1	CASSPGPGNTIYF	TGTGCCAGCAGTCCCGGACCTGGAAACACCATATATTTT	:::::::::0:-5:12:12:3:-10:17:19:-2:39:::
328	TGTGCCAGCAGTCCCGGGACGGCTAATCAGCCCCAGCATTTT	TRBV27	TRBD1	TRBJ1-5	TRBV27*00	TRBJ1	CASSPGTANQPQHF	TGTGCCAGCAGTCCCGGGACGGCTAATCAGCCCCAGCATTTT	:::::::::0::12:12:15::20:24::42:::
329	TGTGCCAGCAGTCCCGGGACGGGAGCCTACGAGCAGTACTTC	TRBV6-2	TRBD1	TRBJ2-7	TRBV6	TRBJ2	CASSPGTGAYEQYF	TGTGCCAGCAGTCCCGGGACGGGAGCCTACGAGCAGTACTTC	:::::::::0:-5:12:12:3:-7:20:25:-2:42:::
330	TGTGCCAGCAGTCCCTGGCGGGAGCAGTTCTTC	TRBV28	TRBD1	TRBJ2-1	TRBV28*00	TRBJ2	CASSPWREQFF	TGTGCCAGCAGTCCCTGGCGGGAGCAGTTCTTC	:::::::::0::12:12:::17:21::33:::
331	TGTGCCAGCAGTCCGACTAGCGGGGGGACCTACGAGCAGTACGTC	TRBV27	TRBD2	TRBJ2-7	TRBV27*00	TRBJ2	CASSPTSGGTYEQYV	TGTGCCAGCAGTCCGACTAGCGGGGGGACCTACGAGCAGTACGTC	:::::::::0::12:14::27:27:28::45:::
332	TGTGCCAGCAGTCCGGGGACAGGGGCTTACGAGCAGTACTTC	TRBV27	TRBD1	TRBJ2-7	TRBV27*00	TRBJ2	CASSPGTGAYEQYF	TGTGCCAGCAGTCCGGGGACAGGGGCTTACGAGCAGTACTTC	:::::::::0::12:12:15::25:27::42:::
333	TGTGCCAGCAGTCCGGGTCTCTCCTACGAGCAGTACGTC	TRBV6-2	TRBD2	TRBJ2-7	TRBV6	TRBJ2	CASSPGLSYEQYV	TGTGCCAGCAGTCCGGGTCTCTCCTACGAGCAGTACGTC	:::::::::0::12:12:14::20:20:20:39:::
334	TGTGCCAGCAGTCCTACCGGGGCATACGGCTACACCTTC	TRBV27	TRBD1	TRBJ1-2	TRBV27*00	TRBJ1	CASSPTGAYGYTF	TGTGCCAGCAGTCCTACCGGGGCATACGGCTACACCTTC	:::::::::0::12:16:18::24:24::39:::
335	TGTGCCAGCAGTCCTCAGGGTGCTTACGAGCAGTACTTC	TRBV27	TRBD1	TRBJ2-7	TRBV27	TRBJ2	CASSPQGAYEQYF	TGTGCCAGCAGTCCTCAGGGTGCTTACGAGCAGTACTTC	:::::::::0:-5:12:15:-4:-3:20:24:-4:39:::
336	TGTGCCAGCAGTCCTCCAGGGGTTCGGAACTATGGCTACACCTTC	TRBV28	TRBD1	TRBJ1-2	TRBV28	TRBJ1	CASSPPGVRNYGYTF	TGTGCCAGCAGTCCTCCAGGGGTTCGGAACTATGGCTACACCTTC	:::::::::0:-5:12:16:-4:-2:22:27:-2:45:::
337	TGTGCCAGCAGTCCTTTACCAGGGGGCAATCAGCCCCAGCATTTT	TRBV6-2	TRBD1	TRBJ1-5	TRBV6	TRBJ1	CASSPLPGGNQPQHF	TGTGCCAGCAGTCCTTTACCAGGGGGCAATCAGCCCCAGCATTTT	:::::::::0:-5:12:19:-4:-2:25:25:-2:45:::
338	TGTGCCAGCAGTCGATCCGGGACGGAGGCCTACGAGCAGTACTTC	TRBV27	TRBD1	TRBJ2-7	TRBV27	TRBJ2	CASSRSGTEAYEQYF	TGTGCCAGCAGTCGATCCGGGACGGAGGCCTACGAGCAGTACTTC	:::::::::0:-5:12:16:2:-7:23:28:-2:45:::
339	TGTGCCAGCAGTCTACAGGGGGCCTACGAGCAGTACTTC	TRBV6-5	TRBD1	TRBJ2-7	TRBV6	TRBJ2	CASSLQGAYEQYF	TGTGCCAGCAGTCTACAGGGGGCCTACGAGCAGTACTTC	:::::::::0::16:16:::22:22::39:::
340	TGTGCCAGCAGTGAAATGATAGCGTACGAGCAGTACTTC	TRBV6-1	TRBD2	TRBJ2-7	TRBV6	TRBJ2	CASSEMIAYEQYF	TGTGCCAGCAGTGAAATGATAGCGTACGAGCAGTACTTC	:::::::::0:-2:15:19:-5:-6:24:24:-4:39:::
341	TGTGCCAGCAGTGAACGGGCGGGGGGGGTTGGAGATACGCAGTATTTT	TRBV25-1	TRBD2	TRBJ2-3	TRBV25	TRBJ2	CASSERAGGVGDTQYF	TGTGCCAGCAGTGAACGGGCGGGGGGGGTTGGAGATACGCAGTATTTT	:::::::::0::15:18::27:27:32::48:::
342	TGTGCCAGCAGTGAACTCCCAGGGGTAGGTCTCTACGAGCAGTACTTC	TRBV6-1	TRBD1	TRBJ2-7	TRBV6	TRBJ2	CASSELPGVGLYEQYF	TGTGCCAGCAGTGAACTCCCAGGGGTAGGTCTCTACGAGCAGTACTTC	:::::::::0::15:19:::24:24:30:48:::
343	TGTGCCAGCAGTGAAGACACGACAGGGATTACTAATGAAAAACTGTTTTTT	TRBV6-1	TRBD1	TRBJ1-4	TRBV6	TRBJ1	CASSEDTTGITNEKLFF	TGTGCCAGCAGTGAAGACACGACAGGGATTACTAATGAAAAACTGTTTTTT	:::::::::0:-1:16:20:-2:-3:27:30:-2:51:::
344	TGTGCCAGCAGTGAAGAGGGTCTAGCGGGGACCGGGGAGCTGTTTTTT	TRBV6-1	TRBD2	TRBJ2-2	TRBV6	TRBJ2	CASSEEGLAGTGELFF	TGTGCCAGCAGTGAAGAGGGTCTAGCGGGGACCGGGGAGCTGTTTTTT	:::::::::0::16:17:17::29:30::48:::
345	TGTGCCAGCAGTGAAGCCGGCGCCTACGAGCAGTACTTC	TRBV6-1		TRBJ2-7	TRBV6	TRBJ2	CASSEAGAYEQYF	TGTGCCAGCAGTGAAGCCGGCGCCTACGAGCAGTACTTC	:::::::::0:17:17:::::19:20:39:::
346	TGTGCCAGCAGTGAAGCGCTAATAGGGGGTCCGAATCAGCCCCAGCATTTT	TRBV6-1	TRBD1	TRBJ1-5	TRBV6	TRBJ1	CASSEALIGGPNQPQHF	TGTGCCAGCAGTGAAGCGCTAATAGGGGGTCCGAATCAGCCCCAGCATTTT	:::::::::0:3:20:23:-5:-1:29:33:-4:51:::
347	TGTGCCAGCAGTGAAGCGCTTCCGGGGGCCTATGGCTACACCTTC	TRBV6-1	TRBD1	TRBJ1-2	TRBV6	TRBJ1	CASSEALPGAYGYTF	TGTGCCAGCAGTGAAGCGCTTCCGGGGGCCTATGGCTACACCTTC	:::::::::0:17:22:23::29:29:29::45:::
348	TGTGCCAGCAGTGAAGGATCCGGATTCTCTGGAAACACCATATATTTT	TRBV2		TRBJ1-3	TRBV2*00	TRBJ1	CASSEGSGFSGNTIYF	TGTGCCAGCAGTGAAGGATCCGGATTCTCTGGAAACACCATATATTTT	:::::::::0::16:::::26:26:48:::
349	TGTGCCAGCAGTGAAGGCAGCGCCTACGAGCAGTACTTC	TRBV7-3		TRBJ2-7	TRBV7	TRBJ2	CASSEGSAYEQYF	TGTGCCAGCAGTGAAGGCAGCGCCTACGAGCAGTACTTC	:::::::::0::11:::::14:20:39:::
350	TGTGCCAGCAGTGAATCCAGGGCCTACGAGCAGTACTTC	TRBV6-1	TRBD1	TRBJ2-7	TRBV6	TRBJ2	CASSESRAYEQYF	TGTGCCAGCAGTGAATCCAGGGCCTACGAGCAGTACTTC	:::::::::0:-2:15:17:-4:-3:22:22:-2:39:::
351	TGTGCCAGCAGTGACCCCCCGGGACTAGCCTACGAGCAGTACTTC	TRBV6-1	TRBD2	TRBJ2-7	TRBV6	TRBJ2	CASSDPPGLAYEQYF	TGTGCCAGCAGTGACCCCCCGGGACTAGCCTACGAGCAGTACTTC	:::::::::0:-3:14:17:3:-8:28:28:-2:45:::
352	TGTGCCAGCAGTGACTCCCCGGGACTAGCCTACGAGCAGTACTTC	TRBV6-6	TRBD2	TRBJ2-7	TRBV6	TRBJ2	CASSDSPGLAYEQYF	TGTGCCAGCAGTGACTCCCCGGGACTAGCCTACGAGCAGTACTTC	:::::::::0:17:17:17:20::28:28::45:::
353	TGTGCCAGCAGTGAGCAGGGGCTGTACACTGAAGCTTTCTTT	TRBV6-1	TRBD1	TRBJ1-1	TRBV6	TRBJ1	CASSEQGLYTEAFF	TGTGCCAGCAGTGAGCAGGGGCTGTACACTGAAGCTTTCTTT	:::::::::0:-3:14:15:-4:-2:21:25:-3:42:::
354	TGTGCCAGCAGTGAGGGGACGGAGGCCTACGAGCAGTACTTC	TRBV6-2	TRBD1	TRBJ2-7	TRBV6	TRBJ2	CASSEGTEAYEQYF	TGTGCCAGCAGTGAGGGGACGGAGGCCTACGAGCAGTACTTC	:::::::::0::12:13::20:21:25::42:::
355	TGTGCCAGCAGTGAGGGGCGCAATCAGCCCCAGCATTTT	TRBV2	TRBD1	TRBJ1-5	TRBV2	TRBJ1	CASSEGRNQPQHF	TGTGCCAGCAGTGAGGGGCGCAATCAGCCCCAGCATTTT	:::::::::0:-3:14:14:-7:0:19:19:-2:39:::
356	TGTGCCAGCAGTGATGGGACAGGGGGCGCCTATGGCTACACCTTC	TRBV25-1	TRBD1	TRBJ1-2	TRBV25	TRBJ1	CASSDGTGGAYGYTF	TGTGCCAGCAGTGATGGGACAGGGGGCGCCTATGGCTACACCTTC	:::::::::0::14:15:15:27:29:29::45:::
357	TGTGCCAGCAGTGATGGGGGGTACAATGAGCAGTTCTTC	TRBV2	TRBD1	TRBJ2-1	TRBV2	TRBJ2	CASSDGGYNEQFF	TGTGCCAGCAGTGATGGGGGGTACAATGAGCAGTTCTTC	:::::::::0:-3:14:15:-6:-1:20:21:-4:39:::
358	TGTGCCAGCAGTGATTATCCAAATGAAAAACTGTTTTTT	TRBV2		TRBJ1-4	TRBV2	TRBJ1	CASSDYPNEKLFF	TGTGCCAGCAGTGATTATCCAAATGAAAAACTGTTTTTT	:::::::::0:-3:14:::::21:-5:39:::
359	TGTGCCAGCAGTGCCGCAGGGGCCTACGAGCAGTACTTC	TRBV6-1	TRBD1	TRBJ2-7	TRBV6	TRBJ2	CASSAAGAYEQYF	TGTGCCAGCAGTGCCGCAGGGGCCTACGAGCAGTACTTC	:::::::::0::13:16:::22:22::39:::
360	TGTGCCAGCAGTGCCGGGACAGTCTCCTACGAGCAGTACGTC	TRBV6-2	TRBD1	TRBJ2-7	TRBV6	TRBJ2	CASSAGTVSYEQYV	TGTGCCAGCAGTGCCGGGACAGTCTCCTACGAGCAGTACGTC	:::::::::0:-5:12:13:2:-5:22:23:0:42:::
361	TGTGCCAGCAGTGCCGGGTGGATCTCCTACGAGCAGTACTTC	TRBV2	TRBD1	TRBJ2-7	TRBV2*00	TRBJ2	CASSAGWISYEQYF	TGTGCCAGCAGTGCCGGGTGGATCTCCTACGAGCAGTACTTC	:::::::::0::13:13:15::18:19:23:42:::
362	TGTGCCAGCAGTGCGGGACAGAACGCCTACGAGCAGTACTTC	TRBV6-1	TRBD1	TRBJ2-7	TRBV6	TRBJ2	CASSAGQNAYEQYF	TGTGCCAGCAGTGCGGGACAGAACGCCTACGAGCAGTACTTC	:::::::::0::13:13:14::21:25::42:::
363	TGTGCCAGCAGTGGAAGTCGGGCAGGGGCCTATGGCTACACCTTC	TRBV2	TRBD1	TRBJ1-2	TRBV2	TRBJ1	CASSGSRAGAYGYTF	TGTGCCAGCAGTGGAAGTCGGGCAGGGGCCTATGGCTACACCTTC	:::::::::0:-4:13:22:-4:-2:28:29:-4:45:::
364	TGTGCCAGCAGTGGACAGGGGGCCTACGAGCAGTACGTC	TRBV6-2	TRBD1	TRBJ2-7	TRBV6	TRBJ2	CASSGQGAYEQYV	TGTGCCAGCAGTGGACAGGGGGCCTACGAGCAGTACGTC	:::::::::0::12:12:::22:22::39:::
365	TGTGCCAGCAGTGGACAGGGGGCCTACGAGCAGTACTTC	TRBV6-3	TRBD1	TRBJ2-7	TRBV6	TRBJ2	CASSGQGAYEQYF	TGTGCCAGCAGTGGACAGGGGGCCTACGAGCAGTACTTC	:::::::::0::12:12:::22:22::39:::
366	TGTGCCAGCAGTGGACAGGGGGCCTACGAGCAGTATGTC	TRBV6-2	TRBD1	TRBJ2-7	TRBV6	TRBJ2	CASSGQGAYEQYV	TGTGCCAGCAGTGGACAGGGGGCCTACGAGCAGTATGTC	:::::::::0:-5:12:12:-1:-1:22:22:-2:39:::
367	TGTGCCAGCAGTGGGACAGGTGAAAATGAAAAACTGTTTTTT	TRBV6-5	TRBD1	TRBJ1-4	TRBV6	TRBJ1	CASSGTGENEKLFF	TGTGCCAGCAGTGGGACAGGTGAAAATGAAAAACTGTTTTTT	:::::::::0:-5:12:12:0:-4:20:24:-5:42:::
368	TGTGCCAGCAGTGGGGGACAGGGGTACGAGCAGTACTTC	TRBV6-1	TRBD1	TRBJ2-7	TRBV6	TRBJ2	CASSGGQGYEQYF	TGTGCCAGCAGTGGGGGACAGGGGTACGAGCAGTACTTC	:::::::::0:-4:13:14:0:-2:24:24:-4:39:::
369	TGTGCCAGCAGTTACCACTTGAACTATGGCTACACCTTC	TRBV6-5		TRBJ1-2	TRBV6	TRBJ1	CASSYHLNYGYTF	TGTGCCAGCAGTTACCACTTGAACTATGGCTACACCTTC	:::::::::0::15:::::21::39:::
370	TGTGCCAGCAGTTACCCGAATCAGCCCCAGCATTTT	TRBV6-2		TRBJ1-5	TRBV6	TRBJ1	CASSYPNQPQHF	TGTGCCAGCAGTTACCCGAATCAGCCCCAGCATTTT	:::::::::0:17:19:::::18::36:::
371	TGTGCCAGCAGTTACGAAGGGGGGACTAACTATGGCTACACCTTC	TRBV6-5	TRBD1	TRBJ1-2	TRBV6	TRBJ1	CASSYEGGTNYGYTF	TGTGCCAGCAGTTACGAAGGGGGGACTAACTATGGCTACACCTTC	:::::::::0:-2:15:17:-5:-1:23:25:0:45:::
372	TGTGCCAGCAGTTACTACGGGGGGGCAAACTATGAGCAGTTCTTC	TRBV6-6	TRBD1	TRBJ2-1	TRBV6	TRBJ2	CASSYYGGANYEQFF	TGTGCCAGCAGTTACTACGGGGGGGCAAACTATGAGCAGTTCTTC	:::::::::0:-1:16:20:-6:0:26:31:-8:45:::
373	TGTGCCAGCAGTTACTCATTCACAGGGGCTGGCACTGAAGCTTTCTTT	TRBV6-5	TRBD1	TRBJ1-1	TRBV6	TRBJ1	CASSYSFTGAGTEAFF	TGTGCCAGCAGTTACTCATTCACAGGGGCTGGCACTGAAGCTTTCTTT	:::::::::0:17:17:21:::28:32::48:::
374	TGTGCCAGCAGTTACTCCCCCCTCCCCAGCCATGGCTACACCTTC	TRBV6-5	TRBD2	TRBJ1-2	TRBV6	TRBJ1	CASSYSPLPSHGYTF	TGTGCCAGCAGTTACTCCCCCCTCCCCAGCCATGGCTACACCTTC	:::::::::0:0:17:19:16:-25:26:31:-6:45:::
375	TGTGCCAGCAGTTACTCGACCGCCGGGGAGCTGTTTTTT	TRBV6-5		TRBJ2-2	TRBV6	TRBJ2	CASSYSTAGELFF	TGTGCCAGCAGTTACTCGACCGCCGGGGAGCTGTTTTTT	:::::::::0:2:19:::::22:-6:39:::
376	TGTGCCAGCAGTTACTCTATCCACGGGGGAACCTACGAGCAGTACTTC	TRBV6-2	TRBD1	TRBJ2-7	TRBV6	TRBJ2	CASSYSIHGGTYEQYF	TGTGCCAGCAGTTACTCTATCCACGGGGGAACCTACGAGCAGTACTTC	:::::::::0:17:17:24:::29:31::48:::
377	TGTGCCAGCAGTTCAGGAACAATCTCCTACGAGCAGTACTTC	TRBV6-2		TRBJ2-7	TRBV6	TRBJ2	CASSSGTISYEQYF	TGTGCCAGCAGTTCAGGAACAATCTCCTACGAGCAGTACTTC	:::::::::0:-4:13:::::23:0:42:::
378	TGTGCCAGCAGTTCAGGGCCGAACGGCGCCTACGAGCAGTACTTC	TRBV6-5	TRBD2	TRBJ2-7	TRBV6	TRBJ2	CASSSGPNGAYEQYF	TGTGCCAGCAGTTCAGGGCCGAACGGCGCCTACGAGCAGTACTTC	:::::::::0::13:14::18:20:25:26:45:::
379	TGTGCCAGCAGTTCAGGGGAGGGAACTGAAGCTTTCTTT	TRBV12-3	TRBD2	TRBJ1-1	TRBV12	TRBJ1	CASSSGEGTEAFF	TGTGCCAGCAGTTCAGGGGAGGGAACTGAAGCTTTCTTT	:::::::::0:-4:13:16:-9:0:23:24:-5:39:::
380	TGTGCCAGCAGTTCAGGGGGCGGCCAGCCCCAGCATTTT	TRBV28	TRBD1	TRBJ1-5	TRBV28*00	TRBJ1	CASSSGGGQPQHF	TGTGCCAGCAGTTCAGGGGGCGGCCAGCCCCAGCATTTT	:::::::::0::13:13::21:22:24::39:::
381	TGTGCCAGCAGTTCCAGGACAGGGGGCACAGATACGCAGTATTTT	TRBV6-5	TRBD1	TRBJ2-3	TRBV6	TRBJ2	CASSSRTGGTDTQYF	TGTGCCAGCAGTTCCAGGACAGGGGGCACAGATACGCAGTATTTT	:::::::::0:-4:13:16:-1:-2:25:25:-1:45:::
382	TGTGCCAGCAGTTCCCAGGGGGCCTATGGCTACACCTTC	TRBV6-5	TRBD1	TRBJ1-2	TRBV6	TRBJ1	CASSSQGAYGYTF	TGTGCCAGCAGTTCCCAGGGGGCCTATGGCTACACCTTC	:::::::::0::13:15::23:23:23::39:::
383	TGTGCCAGCAGTTCGGACGGGACAGGGGTTCGCGAGCAGTTCTTC	TRBV27	TRBD1	TRBJ2-1	TRBV27	TRBJ2	CASSSDGTGVREQFF	TGTGCCAGCAGTTCGGACGGGACAGGGGTTCGCGAGCAGTTCTTC	:::::::::0:-4:13:17:1:-2:28:33:-10:45:::
384	TGTGCCAGCAGTTGGAACCCTAGCACAGATACGCAGTATTTT	TRBV27		TRBJ2-3	TRBV27	TRBJ2	CASSWNPSTDTQYF	TGTGCCAGCAGTTGGAACCCTAGCACAGATACGCAGTATTTT	:::::::::0:-4:13:::::19:2:42:::
385	TGTGCCAGCAGTTTAAGACAGGGGGCCGATGAGCAGTTCTTC	TRBV12-4	TRBD1	TRBJ2-1	TRBV12	TRBJ2	CASSLRQGADEQFF	TGTGCCAGCAGTTTAAGACAGGGGGCCGATGAGCAGTTCTTC	:::::::::0::15:16::26:26:28::42:::
386	TGTGCCAGCAGTTTACAAGGGTCAAACTATGGCTACACCTTC	TRBV27		TRBJ1-2	TRBV27*00	TRBJ1	CASSLQGSNYGYTF	TGTGCCAGCAGTTTACAAGGGTCAAACTATGGCTACACCTTC	:::::::::0::15:::::24::42:::
387	TGTGCCAGCAGTTTACAAGGGTCCTACGAGCAGTACTTC	TRBV12-4		TRBJ2-7	TRBV12	TRBJ2	CASSLQGSYEQYF	TGTGCCAGCAGTTTACAAGGGTCCTACGAGCAGTACTTC	:::::::::0:-2:15:::::21:-1:39:::
388	TGTGCCAGCAGTTTACTAGACAGAATTTACGAGCAGTACGTC	TRBV12-3	TRBD1	TRBJ2-7	TRBV12	TRBJ2	CASSLLDRIYEQYV	TGTGCCAGCAGTTTACTAGACAGAATTTACGAGCAGTACGTC	:::::::::0:-2:15:18:-2:-5:23:27:-4:42:::
389	TGTGCCAGCAGTTTAGGGGGGAGCTCCTATGGCTACACCTTC	TRBV12-3	TRBD1	TRBJ1-2	TRBV12	TRBJ1	CASSLGGSSYGYTF	TGTGCCAGCAGTTTAGGGGGGAGCTCCTATGGCTACACCTTC	:::::::::0:-1:16:16:-6:-1:21:26:-4:42:::
390	TGTGCCAGCAGTTTGACAGATAACTATGGCTACACCTTC	TRBV9		TRBJ1-2	TRBV9*00	TRBJ1	CASSLTDNYGYTF	TGTGCCAGCAGTTTGACAGATAACTATGGCTACACCTTC	:::::::::0::11:::::17:19:39:::
391	TGTGCCAGCAGTTTGCCGGGACAGGGGATGAGCTCCTACGAGCAGTACGTC	TRBV6-2	TRBD1	TRBJ2-7	TRBV6	TRBJ2	CASSLPGQGMSSYEQYV	TGTGCCAGCAGTTTGCCGGGACAGGGGATGAGCTCCTACGAGCAGTACGTC	:::::::::0:-4:13:15:2:-2:27:29:3:51:::
392	TGTGCCAGCAGTTTGCCGGGACAGGGGATGAGCTCCTACGAGCAGTACTTC	TRBV6-2	TRBD1	TRBJ2-7	TRBV6	TRBJ2	CASSLPGQGMSSYEQYF	TGTGCCAGCAGTTTGCCGGGACAGGGGATGAGCTCCTACGAGCAGTACTTC	:::::::::0:-4:13:15:2:-2:27:29:3:51:::
393	TGTGCCAGCAGTTTGGGGGGGGCTGGAAGTCAGCCCCAGCATTTT	TRBV27	TRBD1	TRBJ1-5	TRBV27*00	TRBJ1	CASSLGGAGSQPQHF	TGTGCCAGCAGTTTGGGGGGGGCTGGAAGTCAGCCCCAGCATTTT	:::::::::0::14:17::23:23:29::45:::
394	TGTGCCAGCAGTTTTGGGACAGGCGCTTATGGAGCTTTCTTT	TRBV27	TRBD1	TRBJ1-1	TRBV27	TRBJ1	CASSFGTGAYGAFF	TGTGCCAGCAGTTTTGGGACAGGCGCTTATGGAGCTTTCTTT	:::::::::0:-3:14:15:0:-4:23:32:-10:42:::
395	TGTGCCAGCATCAATAGCGGGGGGCTTTATACGCAGTATTTT	TRBV5-8	TRBD2	TRBJ2-3	TRBV5	TRBJ2	CASINSGGLYTQYF	TGTGCCAGCATCAATAGCGGGGGGCTTTATACGCAGTATTTT	:::::::::0:-6:10:14:-5:-4:21:28:-7:42:::
396	TGTGCCAGCATCGGGGGGGCAGGGGGCGCGGGGACTGAAGCTTTCTTT	TRBV7-6	TRBD1	TRBJ1-1	TRBV7	TRBJ1	CASIGGAGGAGTEAFF	TGTGCCAGCATCGGGGGGGCAGGGGGCGCGGGGACTGAAGCTTTCTTT	:::::::::0:-7:10:15:0:2:29:33:-5:48:::
397	TGTGCCAGCCTCGGTCAGGGGGCTGCTGAAGCTTTCTTT	TRBV12-3	TRBD1	TRBJ1-1	TRBV12	TRBJ1	CASLGQGAAEAFF	TGTGCCAGCCTCGGTCAGGGGGCTGCTGAAGCTTTCTTT	:::::::::0::9:12::23:23:25::39:::
398	TGTGCCAGCGCCCCCGGGACAGTCTCCTACGAGCAGTACTTC	TRBV6-2	TRBD1	TRBJ2-7	TRBV6	TRBJ2	CASAPGTVSYEQYF	TGTGCCAGCGCCCCCGGGACAGTCTCCTACGAGCAGTACTTC	:::::::::0::9:12:15::22:23:23:42:::
399	TGTGCCAGCGGAGCTCAAGCCGGGACAGGGGCCTATGGCTACACCTTC	TRBV6-1	TRBD1	TRBJ1-2	TRBV6	TRBJ1	CASGAQAGTGAYGYTF	TGTGCCAGCGGAGCTCAAGCCGGGACAGGGGCCTATGGCTACACCTTC	:::::::::0::9:19:21::31:32::48:::
400	TGTGCCAGCGGCCCAGCGGGGGGTTACGAGCAGTACGTC	TRBV6-1	TRBD2	TRBJ2-7	TRBV6	TRBJ2	CASGPAGGYEQYV	TGTGCCAGCGGCCCAGCGGGGGGTTACGAGCAGTACGTC	:::::::::0:-8:9:14:-6:-4:20:24:-4:39:::
401	TGTGCCAGCGGCCGGACCATGGGAACTGAAGCTTTCTTT	TRBV12-4		TRBJ1-1	TRBV12	TRBJ1	CASGRTMGTEAFF	TGTGCCAGCGGCCGGACCATGGGAACTGAAGCTTTCTTT	:::::::::0:-8:9:::::24:-5:39:::
402	TGTGCCAGCGGCCGGACCCTGGGAACTGAAGCTTTCTTT	TRBV12-4	TRBD1	TRBJ1-1	TRBV12	TRBJ1	CASGRTLGTEAFF	TGTGCCAGCGGCCGGACCCTGGGAACTGAAGCTTTCTTT	:::::::::0::9:16:::21:24::39:::
403	TGTGCCAGCGTTAATGGGGGCGAGGCTGAAGCTTTCTTT	TRBV6-2	TRBD1	TRBJ1-1	TRBV6	TRBJ1	CASVNGGEAEAFF	TGTGCCAGCGTTAATGGGGGCGAGGCTGAAGCTTTCTTT	:::::::::0:-8:9:15:-6:1:22:25:-6:39:::
404	TGTGCCAGCGTTCCGGGACGGAACAATGAGCAGTTCTTC	TRBV2	TRBD1	TRBJ2-1	TRBV2*00	TRBJ2	CASVPGRNNEQFF	TGTGCCAGCGTTCCGGGACGGAACAATGAGCAGTTCTTC	:::::::::0::9:9:14::19:22::39:::
405	TGTGCCAGCTCACCTCCCGGCACGAACACCGGGGAGCTGTTTTTT	TRBV18	TRBD1	TRBJ2-2	TRBV18	TRBJ2	CASSPPGTNTGELFF	TGTGCCAGCTCACCTCCCGGCACGAACACCGGGGAGCTGTTTTTT	:::::::::0:-3:14:14:4:-10:20:22:0:45:::
406	TGTGCCAGCTCACGAGGAGGGACAGAAAACATTCAGTACTTC	TRBV18	TRBD1	TRBJ2-4	TRBV18	TRBJ2	CASSRGGTENIQYF	TGTGCCAGCTCACGAGGAGGGACAGAAAACATTCAGTACTTC	:::::::::0:-4:13:18:0:-5:25:25:-5:42:::
407	TGTGCCAGCTCACTGGGGCCGGGACCCATATCGGAAGCTTTCTTT	TRBV3-2	TRBD1	TRBJ1-1	TRBV3	TRBJ1	CASSLGPGPISEAFF	TGTGCCAGCTCACTGGGGCCGGGACCCATATCGGAAGCTTTCTTT	:::::::::0:-8:9:18:2:-7:25:33:-8:45:::
408	TGTGCCAGCTCACTGGGGCCGGGACCCGTATCGGAAGCTTTCTTT	TRBV12-4	TRBD1	TRBJ1-1	TRBV12	TRBJ1	CASSLGPGPVSEAFF	TGTGCCAGCTCACTGGGGCCGGGACCCGTATCGGAAGCTTTCTTT	:::::::::0::9:18:20::25:33::45:::
409	TGTGCCAGCTCACTGGGGCCGGGGCCCGTATCGGAAGCTTTCTTT	TRBV12-3	TRBD2	TRBJ1-1	TRBV12	TRBJ1	CASSLGPGPVSEAFF	TGTGCCAGCTCACTGGGGCCGGGGCCCGTATCGGAAGCTTTCTTT	:::::::::0:-8:9:21:-13:3:27:33:-8:45:::
410	TGTGCCAGCTCAGGGACAGTCTCCTACGAGCAGTACTTC	TRBV6-2	TRBD1	TRBJ2-7	TRBV6	TRBJ2	CASSGTVSYEQYF	TGTGCCAGCTCAGGGACAGTCTCCTACGAGCAGTACTTC	:::::::::0:-8:9:12:0:-5:19:20:0:39:::
411	TGTGCCAGCTCATTGGGGCCGGGACCCGTATCGGAAGCTTTCTTT	TRBV12-3	TRBD1	TRBJ1-1	TRBV12	TRBJ1	CASSLGPGPVSEAFF	TGTGCCAGCTCATTGGGGCCGGGACCCGTATCGGAAGCTTTCTTT	:::::::::0:-8:9:18:2:-7:25:33:-8:45:::
412	TGTGCCAGCTTCGGGGGGGCTGGACAGCCCCAGCATTTT	TRBV2	TRBD2	TRBJ1-5	TRBV2*00	TRBJ1	CASFGGAGQPQHF	TGTGCCAGCTTCGGGGGGGCTGGACAGCCCCAGCATTTT	:::::::::0::9:11::19:20:24::39:::
413	TGTGCCAGCTTGCCTGAGCGGGGGGACAATGAGCAGTTCTTC	TRBV4-2	TRBD2	TRBJ2-1	TRBV4	TRBJ2	CASLPERGDNEQFF	TGTGCCAGCTTGCCTGAGCGGGGGGACAATGAGCAGTTCTTC	:::::::::0:-8:9:16:-6:-4:22:25:-5:42:::
414	TGTGCCAGTAGTATAGAACGATCGGGGGGCAAGATTGGCTACACCTTC	TRBV19	TRBD1	TRBJ1-2	TRBV19	TRBJ1	CASSIERSGGKIGYTF	TGTGCCAGTAGTATAGAACGATCGGGGGGCAAGATTGGCTACACCTTC	:::::::::0:0:17:24:-6:0:30:35:-7:48:::
415	TGTGCCAGTAGTGGCTCGACAGGGTACGAGCAGTACTTC	TRBV19	TRBD1	TRBJ2-7	TRBV19*00	TRBJ2	CASSGSTGYEQYF	TGTGCCAGTAGTGGCTCGACAGGGTACGAGCAGTACTTC	:::::::::0::12:17:::24:24::39:::
416	TGTGCCAGTAGTTCCTCCGGGACAGGGGCCTACGAGCAGTACTTC	TRBV19	TRBD1	TRBJ2-7	TRBV19*00	TRBJ2	CASSSSGTGAYEQYF	TGTGCCAGTAGTTCCTCCGGGACAGGGGCCTACGAGCAGTACTTC	:::::::::0::12:16:18::28:28::45:::
417	TGTGCCAGTGGACAGGGAGCCTACGAGCAGTACTTC	TRBV6-2	TRBD1	TRBJ2-7	TRBV6	TRBJ2	CASGQGAYEQYF	TGTGCCAGTGGACAGGGAGCCTACGAGCAGTACTTC	:::::::::0::8:9:::17:19::36:::
418	TGTGCCAGTGGGGACAGGGCGATGCCCCAGCATTTT	TRBV2	TRBD1	TRBJ1-5	TRBV2*00	TRBJ1	CASGDRAMPQHF	TGTGCCAGTGGGGACAGGGCGATGCCCCAGCATTTT	:::::::::0::8:10:10::19:23::36:::
419	TGTGCCAGTGGGGCGGGGGGCCCCTACGAGCAGTACTTC	TRBV12-4	TRBD1	TRBJ2-7	TRBV12	TRBJ2	CASGAGGPYEQYF	TGTGCCAGTGGGGCGGGGGGCCCCTACGAGCAGTACTTC	:::::::::0::8:9::14:15:16:20:39:::
420	TGTGCCAGTTCAGAACAGGGGTCTGGGGCCAACGTCCTGACTTTC	TRBV19	TRBD1	TRBJ2-6	TRBV19	TRBJ2	CASSEQGSGANVLTF	TGTGCCAGTTCAGAACAGGGGTCTGGGGCCAACGTCCTGACTTTC	:::::::::0:-8:9:14:-3:-2:21:21:-1:45:::
421	TGTGCCAGTTCCCCCTCGGGAGGGACTGAAGCTTTCTTT	TRBV6-2	TRBD2	TRBJ1-1	TRBV6	TRBJ1	CASSPSGGTEAFF	TGTGCCAGTTCCCCCTCGGGAGGGACTGAAGCTTTCTTT	:::::::::0::8:16::24:24:24::39:::
422	TGTGCCATACAGGGAAGGGGCACAGATACGCAGTATTTT	TRBV10-3	TRBD1	TRBJ2-3	TRBV10	TRBJ2	CAIQGRGTDTQYF	TGTGCCATACAGGGAAGGGGCACAGATACGCAGTATTTT	:::::::::0:-9:8:8:-3:-3:14:19:-1:39:::
423	TGTGCCATCACGGGGGGGCCCGCCTACGAGCAGTACTTC	TRBV10-3	TRBD2	TRBJ2-7	TRBV10	TRBJ2	CAITGGPAYEQYF	TGTGCCATCACGGGGGGGCCCGCCTACGAGCAGTACTTC	:::::::::0:-7:10:10:-8:3:21:22:-2:39:::
424	TGTGCCATCAGTGAAGGTGGGGCCTACGAGCAGTACTTC	TRBV10-3		TRBJ2-7	TRBV10	TRBJ2	CAISEGGAYEQYF	TGTGCCATCAGTGAAGGTGGGGCCTACGAGCAGTACTTC	:::::::::0::14:::::22::39:::
425	TGTGCCATCAGTGAATCCGGGACAGCATACAATGAGCAGTTCTTC	TRBV10-3	TRBD1	TRBJ2-1	TRBV10	TRBJ2	CAISESGTAYNEQFF	TGTGCCATCAGTGAATCCGGGACAGCATACAATGAGCAGTTCTTC	:::::::::0:17:17:17:18::25:27::45:::
426	TGTGCCATCAGTGACCCAGTCGGTGGGGGAGTCACTAGCGGGGGGACAGATACGCAGTATTTT	TRBV6-4	TRBD2	TRBJ2-3	TRBV6	TRBJ2	CAISDPVGGGVTSGGTDTQYF	TGTGCCATCAGTGACCCAGTCGGTGGGGGAGTCACTAGCGGGGGGACAGATACGCAGTATTTT	:::::::::0:16:21:33::45:45:45::63:::
427	TGTGCCATCAGTGAGTCGAGTGCCTATGAGCAGTTCTTC	TRBV10-3		TRBJ2-1	TRBV10	TRBJ2	CAISESSAYEQFF	TGTGCCATCAGTGAGTCGAGTGCCTATGAGCAGTTCTTC	:::::::::0:2:19:::::25:-8:39:::
428	TGTGCCATCAGTGAGTCTGCAGCCTACGAGCAGTACGTC	TRBV10-3		TRBJ2-7	TRBV10	TRBJ2	CAISESAAYEQYV	TGTGCCATCAGTGAGTCTGCAGCCTACGAGCAGTACGTC	:::::::::0:0:17:::::22:-2:39:::
429	TGTGCCATCAGTGATGGGACTAGTGGTAGCTCCTACAATGAGCAGTTCTTC	TRBV10-3	TRBD2	TRBJ2-1	TRBV10	TRBJ2	CAISDGTSGSSYNEQFF	TGTGCCATCAGTGATGGGACTAGTGGTAGCTCCTACAATGAGCAGTTCTTC	:::::::::0::14:15:15::26:27:29:51:::
430	TGTGCCGGCAGTCCCCAAGGCGGGTACGAGCAGTACTTC	TRBV6-2	TRBD2	TRBJ2-7	TRBV6	TRBJ2	CAGSPQGGYEQYF	TGTGCCGGCAGTCCCCAAGGCGGGTACGAGCAGTACTTC	:::::::::0:-5:12:19:-7:-4:24:24:-4:39:::
431	TGTGCCGGGAGTGCAGGGCCTGGAAACACCATATATTTT	TRBV6-1		TRBJ1-3	TRBV6	TRBJ1	CAGSAGPGNTIYF	TGTGCCGGGAGTGCAGGGCCTGGAAACACCATATATTTT	:::::::::0:17:19:::::13:18:39:::
432	TGTGCCGTCGACTCTAGCGGGGTCACAGATACGCAGTATTTT	TRBV2	TRBD2	TRBJ2-3	TRBV2*00	TRBJ2	CAVDSSGVTDTQYF	TGTGCCGTCGACTCTAGCGGGGTCACAGATACGCAGTATTTT	:::::::::0::6:13:::21:23::42:::
433	TGTGCCTGGAGAGGGGGAATGGGCACTGAAGCTTTCTTT	TRBV30	TRBD1	TRBJ1-1	TRBV30	TRBJ1	CAWRGGMGTEAFF	TGTGCCTGGAGAGGGGGAATGGGCACTGAAGCTTTCTTT	:::::::::0:-3:11:11:-5:-1:17:23:-4:39:::
434	TGTGCCTGGGGAAGCAGCTCGAGGGGCTACACCTTC	TRBV30		TRBJ1-2	TRBV30	TRBJ1	CAWGSSSRGYTF	TGTGCCTGGGGAAGCAGCTCGAGGGGCTACACCTTC	:::::::::0:-5:9:::::24:-8:36:::
435	TGTGCTAGCAGCTTAGGGACCGTCTTCGAGCAGTTCTTC	TRBV7-7		TRBJ2-1	TRBV7	TRBJ2	CASSLGTVFEQFF	TGTGCTAGCAGCTTAGGGACCGTCTTCGAGCAGTTCTTC	:::::::::0:-1:16:::::27:-10:39:::
436	TGTGCTAGCAGCTTAGTAGGATACCAAGAGACCCAGTACTTC	TRBV7-7		TRBJ2-5	TRBV7	TRBJ2	CASSLVGYQETQYF	TGTGCTAGCAGCTTAGTAGGATACCAAGAGACCCAGTACTTC	:::::::::0:-1:16:::::21:1:42:::
437	TGTGCTAGTGGTGCGACGGGCGGAACTGAAGCTTTCTTT	TRBV12-5	TRBD1	TRBJ1-1	TRBV12	TRBJ1	CASGATGGTEAFF	TGTGCTAGTGGTGCGACGGGCGGAACTGAAGCTTTCTTT	:::::::::0::12:17::21:22:24::39:::
438	TGTGCTAGTGGTTTTGGGGGCTACGAGCAGTACTTC	TRBV12-5	TRBD1	TRBJ2-7	TRBV12	TRBJ2	CASGFGGYEQYF	TGTGCTAGTGGTTTTGGGGGCTACGAGCAGTACTTC	:::::::::0:-3:14:15:-6:-1:20:20:-3:36:::
439	TGTGTCACCAGCGTGACAGGGGGGAATTCACCCCTCCACTTT	TRBV15	TRBD1	TRBJ1-6	TRBV15	TRBJ1	CVTSVTGGNSPLHF	TGTGTCACCAGCGTGACAGGGGGGAATTCACCCCTCCACTTT	:::::::::0:-5:12:14:-2:-1:23:24:-7:42:::
440	AGCGCCAGCAGCACGTCCTCGACATGGGCCTATGGCTACACCTTC	TRBV5-1	TRBD1	TRBJ1-2	TRBV5	TRBJ1	SASSTSSTWAYGYTF	AGCGCCAGCAGCACGTCCTCGACATGGGCCTATGGCTACACCTTC	:::::::::0::12:20:::28:29::45:::
441	AGTGACAGCATCATGGGGAGCGGGGCCTCCTACAATGAGCAGTTCTTC	TRBV21-1	TRBD2	TRBJ2-1	TRBV21	TRBJ2	SDSIMGSGASYNEQFF	AGTGACAGCATCATGGGGAGCGGGGCCTCCTACAATGAGCAGTTCTTC	:::::::::0::13:18:::24:26:26:48:::
442	AGTGCCACCAGCGGGGGGCCCGGGACAGGGGTCTACGAGCAGTACTTC	TRBV15	TRBD1	TRBJ2-7	TRBV15*00	TRBJ2	SATSGGPGTGVYEQYF	AGTGCCACCAGCGGGGGGCCCGGGACAGGGGTCTACGAGCAGTACTTC	:::::::::0::12:18:21::31:32::48:::
443	AGTGCCAGCAGCCAAGGGGGCTCTTCGAAGGATTTCTTT	TRBV6-1	TRBD1	TRBJ1-1	TRBV6	TRBJ1	SASSQGGSSKDFF	AGTGCCAGCAGCCAAGGGGGCTCTTCGAAGGATTTCTTT	:::::::::0::11:14::21:21:32::39:::
444	AGTGCCAGCAGCCATGATGTGGCATGGGGCTATGGCTACACCTTC	TRBV4-2		TRBJ1-2	TRBV4	TRBJ1	SASSHDVAWGYGYTF	AGTGCCAGCAGCCATGATGTGGCATGGGGCTATGGCTACACCTTC	:::::::::0:17:18:::::29::45:::
445	CGTGCCAGCAGCTTATCCCTCGGGGGGCAACATAATGGCTACACCTTC	TRBV7-6	TRBD1	TRBJ1-2	TRBV7	TRBJ1	RASSLSLGGQHNGYTF	CGTGCCAGCAGCTTATCCCTCGGGGGGCAACATAATGGCTACACCTTC	:::::::::0::15:22::28:28:34::48:::
446	GGCGCCAGCAGCCAAGATAACAACCCGGGCTATGGCTACACCTTC	TRBV4-3	TRBD1	TRBJ1-2	TRBV4	TRBJ1	GASSQDNNPGYGYTF	GGCGCCAGCAGCCAAGATAACAACCCGGGCTATGGCTACACCTTC	:::::::::0:17:18:23:26::29:29::45:::
447	GGCGTCAGCAGCCAAAATGACAGGGCGGCTAATGAAAACCTGTTTTTT	TRBV4-3	TRBD1	TRBJ1-4	TRBV4	TRBJ1	GVSSQNDRAANENLFF	GGCGTCAGCAGCCAAAATGACAGGGCGGCTAATGAAAACCTGTTTTTT	:::::::::0:17:18:18:::25:28::48:::
448	GGTGCCACCAGCAGCGGGACAGGACCCTACGAGCAGTACGTC	TRBV15	TRBD1	TRBJ2-7	TRBV15*00	TRBJ2	GATSSGTGPYEQYV	GGTGCCACCAGCAGCGGGACAGGACCCTACGAGCAGTACGTC	:::::::::0::14:14:15::20:20:24:42:::
449	GGTGCCAGCAGCCCCGGGACAGGGAACTATGGCTACAACTTC	TRBV7-6	TRBD1	TRBJ1-2	TRBV7	TRBJ1	GASSPGTGNYGYNF	GGTGCCAGCAGCCCCGGGACAGGGAACTATGGCTACAACTTC	:::::::::0::12:12:15::24:24::42:::
450	GGTGCCAGCAGCCCTAGGGGGGCAGGTGCACCCCTCCACTTT	TRBV12-3	TRBD1	TRBJ1-6	TRBV12	TRBJ1	GASSPRGAGAPLHF	GGTGCCAGCAGCCCTAGGGGGGCAGGTGCACCCCTCCACTTT	:::::::::0::11:15:::21:28::42:::
451	GGTGCCAGCAGTGCCGTACGGACAGGGGGCTACGAGCAGTACGTC	TRBV2	TRBD1	TRBJ2-7	TRBV2*00	TRBJ2	GASSAVRTGGYEQYV	GGTGCCAGCAGTGCCGTACGGACAGGGGGCTACGAGCAGTACGTC	:::::::::0::13:19:::29:29::45:::
452	TACAGCGTTCCGACTAGCGGGGGGCACAATGAGCAGTTCTTC	TRBV29-1	TRBD2	TRBJ2-1	TRBV29	TRBJ2	YSVPTSGGHNEQFF	TACAGCGTTCCGACTAGCGGGGGGCACAATGAGCAGTTCTTC	:::::::::0::9:11::24:25:25::42:::
453	TATGCCACCAGCGGGGGACAGGGCTTCTACAATGAGCAGTTCTTC	TRBV15	TRBD1	TRBJ2-1	TRBV15*00	TRBJ2	YATSGGQGFYNEQFF	TATGCCACCAGCGGGGGACAGGGCTTCTACAATGAGCAGTTCTTC	:::::::::0::12:14:14::19:19:23:45:::
454	TATGCCAGCAGCCCGGGACCAGCGTACGAGCAGTACTTC	TRBV7-2	TRBD2	TRBJ2-7	TRBV7	TRBJ2	YASSPGPAYEQYF	TATGCCAGCAGCCCGGGACCAGCGTACGAGCAGTACTTC	:::::::::0::12:12:14::24:24::39:::
455	TATGCCAGCAGTACTGGACTAGCGGGAGTCTACGAGCAGTACTTC	TRBV27	TRBD2	TRBJ2-7	TRBV27*00	TRBJ2	YASSTGLAGVYEQYF	TATGCCAGCAGTACTGGACTAGCGGGAGTCTACGAGCAGTACTTC	:::::::::0::12:15:::24:24:28:45:::
456	TATGCCAGCAGTCCGACTAGCGGGGGGACCTACGAGCAGTACGTC	TRBV27	TRBD2	TRBJ2-7	TRBV27*00	TRBJ2	YASSPTSGGTYEQYV	TATGCCAGCAGTCCGACTAGCGGGGGGACCTACGAGCAGTACGTC	:::::::::0::12:14::27:27:28::45:::
457	TCCTACGAGCAGTACTTC	TRBV20-1		TRBJ2-7	TRBV20	TRBJ2	SYEQYF	TCCTACGAGCAGTACTTC	:::::::::0::1:::::0::18:::
458	TCTACCAGCACCTTAGCGCAGGCGCCATACTACGAGCAGTACTTC	TRBV7-6	TRBD1	TRBJ2-7	TRBV7	TRBJ2	STSTLAQAPYYEQYF	TCTACCAGCACCTTAGCGCAGGCGCCATACTACGAGCAGTACTTC	:::::::::0:17:19:20::23:26:29::45:::
459	TCTGCCACCAGCACCGGGACCACCTACGAGCAGTACTTC	TRBV15		TRBJ2-7	TRBV15*00	TRBJ2	SATSTGTTYEQYF	TCTGCCACCAGCACCGGGACCACCTACGAGCAGTACTTC	:::::::::0::13:::::16:20:39:::
460	TCTGCCACCAGCAGAGGGACAGCCTACGAGCAGTACTTC	TRBV15	TRBD1	TRBJ2-7	TRBV15*00	TRBJ2	SATSRGTAYEQYF	TCTGCCACCAGCAGAGGGACAGCCTACGAGCAGTACTTC	:::::::::0::16:16:::22:22::39:::
461	TCTGCCACCATCCTCTATGAGATCCTGCTAGGGAAGGCCACCGGGACAGGGGCCTATGGCTACACCTTC	TRBV15	TRBD1	TRBJ1-2	TRBV15*00	TRBJ1	SATILYEILLGKATGTGAYGYTF	TCTGCCACCATCCTCTATGAGATCCTGCTAGGGAAGGCCACCGGGACAGGGGCCTATGGCTACACCTTC	:::::::::0::10:40:42::52:53::69:::
462	TCTGCCAGCACTGAGCGGGGGGGCTCCTACAATGAGCAGTTCTTC	TRBV13	TRBD2	TRBJ2-1	TRBV13*00	TRBJ2	SASTERGGSYNEQFF	TCTGCCAGCACTGAGCGGGGGGGCTCCTACAATGAGCAGTTCTTC	:::::::::0::10:13:::19:19:23:45:::
463	TCTGCCAGCAGCCGCCTGAGAGGGCCCAATGAGCAGTTCTTC	TRBV9	TRBD2	TRBJ2-1	TRBV9*00	TRBJ2	SASSRLRGPNEQFF	TCTGCCAGCAGCCGCCTGAGAGGGCCCAATGAGCAGTTCTTC	:::::::::0::12:19::24:26:26::42:::
464	TCTGCCAGCAGCGGTGGGGGGACAGGGTACAATGAGCAGTTCTTC	TRBV9	TRBD1	TRBJ2-1	TRBV9*00	TRBJ2	SASSGGGTGYNEQFF	TCTGCCAGCAGCGGTGGGGGGACAGGGTACAATGAGCAGTTCTTC	:::::::::0::13:18:18::27:27::45:::
465	TCTGCCAGCAGTGCCTGGACAGGGGGCACAGATACGCAGTATTTT	TRBV6-1	TRBD1	TRBJ2-3	TRBV6	TRBJ2	SASSAWTGGTDTQYF	TCTGCCAGCAGTGCCTGGACAGGGGGCACAGATACGCAGTATTTT	:::::::::0::13:13:15::25:25::45:::
466	TCTGCCAGCAGTGTCGTAGGGATAGGGGCCTACGAGCAGTACGTC	TRBV2	TRBD1	TRBJ2-7	TRBV2*00	TRBJ2	SASSVVGIGAYEQYV	TCTGCCAGCAGTGTCGTAGGGATAGGGGCCTACGAGCAGTACGTC	:::::::::0::13:18:18::28:28::45:::
467	TGCAGCGCACCACTAGCGGGGGGGAACAATGAGCAGTTCTTC	TRBV29-1	TRBD2	TRBJ2-1	TRBV29	TRBJ2	CSAPLAGGNNEQFF	TGCAGCGCACCACTAGCGGGGGGGAACAATGAGCAGTTCTTC	:::::::::0::7:11::24:24:25::42:::
468	TGCAGCGCCCCACTAGCGGGGGGAGGCAATGAGCAATTCTTC	TRBV29-1	TRBD2	TRBJ2-1	TRBV29	TRBJ2	CSAPLAGGGNEQFF	TGCAGCGCCCCACTAGCGGGGGGAGGCAATGAGCAATTCTTC	:::::::::0::7:11::23:23:26::42:::
469	TGCAGCGCCCCGACTAGCGGGGGGGAGAATGAGCAGTTCTTC	TRBV29-1	TRBD2	TRBJ2-1	TRBV29	TRBJ2	CSAPTSGGENEQFF	TGCAGCGCCCCGACTAGCGGGGGGGAGAATGAGCAGTTCTTC	:::::::::0::7:11::25:25:27::42:::
470	TGCAGCGCCCCTAACGGGGGGAATGGCAATGAGCAGTTCTTC	TRBV29-1	TRBD2	TRBJ2-1	TRBV29	TRBJ2	CSAPNGGNGNEQFF	TGCAGCGCCCCTAACGGGGGGAATGGCAATGAGCAGTTCTTC	:::::::::0::7:10::21:21:26::42:::
471	TGCAGCGCCCTACTATCGGGGGGAGCGAATGAGCAGTTCTTC	TRBV29-1	TRBD2	TRBJ2-1	TRBV29	TRBJ2	CSALLSGGANEQFF	TGCAGCGCCCTACTATCGGGGGGAGCGAATGAGCAGTTCTTC	:::::::::0::7:11::23:23:27::42:::
472	TGCAGCGTAAACAGGGGGATAGGGAACACTGAAGCTTTCTTT	TRBV29-1	TRBD1	TRBJ1-1	TRBV29	TRBJ1	CSVNRGIGNTEAFF	TGCAGCGTAAACAGGGGGATAGGGAACACTGAAGCTTTCTTT	:::::::::0::8:10:::18:23::42:::
473	TGCAGCGTACCACTAGCGGGGGGAGGGAATGAGCAGTTCTTC	TRBV29-1	TRBD2	TRBJ2-1	TRBV29	TRBJ2	CSVPLAGGGNEQFF	TGCAGCGTACCACTAGCGGGGGGAGGGAATGAGCAGTTCTTC	:::::::::0::8:11::23:23:27::42:::
474	TGCAGCGTCTCCCTGGGCGGTGGAGCCAATGAGCAGTTCTTC	TRBV29-1	TRBD1	TRBJ2-1	TRBV29	TRBJ2	CSVSLGGGANEQFF	TGCAGCGTCTCCCTGGGCGGTGGAGCCAATGAGCAGTTCTTC	:::::::::0::8:10:::15:26::42:::
475	TGCAGCGTGGCTCTAGCGGGGGGGCTGAATGAGCAGTTCTTC	TRBV29-1	TRBD2	TRBJ2-1	TRBV29	TRBJ2	CSVALAGGLNEQFF	TGCAGCGTGGCTCTAGCGGGGGGGCTGAATGAGCAGTTCTTC	:::::::::0::8:12::24:25:27::42:::
476	TGCAGCGTGGGGGGGACTAGCGGACGGGGTACAGATACGCAGTATTTT	TRBV29-1	TRBD2	TRBJ2-3	TRBV29	TRBJ2	CSVGGTSGRGTDTQYF	TGCAGCGTGGGGGGGACTAGCGGACGGGGTACAGATACGCAGTATTTT	:::::::::0::8:12:12::23:30::48:::
477	TGCAGCGTTCCCAGGGGCGGGGGGGACAATGAGCAGTTCTTC	TRBV29-1	TRBD2	TRBJ2-1	TRBV29	TRBJ2	CSVPRGGGDNEQFF	TGCAGCGTTCCCAGGGGCGGGGGGGACAATGAGCAGTTCTTC	:::::::::0::9:16::25:25:25::42:::
478	TGCAGCGTTCCGACTAGCGGGGGGCACAATGAGCAGTTCTTC	TRBV29-1	TRBD2	TRBJ2-1	TRBV29	TRBJ2	CSVPTSGGHNEQFF	TGCAGCGTTCCGACTAGCGGGGGGCACAATGAGCAGTTCTTC	:::::::::0::9:11::24:25:25::42:::
479	TGCAGCGTTGATAGGGACAGGGGTCGCGAGCAGTACGTC	TRBV29-1	TRBD1	TRBJ2-7	TRBV29	TRBJ2	CSVDRDRGREQYV	TGCAGCGTTGATAGGGACAGGGGTCGCGAGCAGTACGTC	:::::::::0::11:13:13:25:26:26::39:::
480	TGCAGCGTTGCAGGCGAGCAGTACGTC	TRBV29-1		TRBJ2-7	TRBV29	TRBJ2	CSVAGEQYV	TGCAGCGTTGCAGGCGAGCAGTACGTC	:::::::::0::13:::::14::27:::
481	TGCAGCGTTGCCCTAGCGGGGGGGCCGAATGAGCAGTTCTTC	TRBV29-1	TRBD2	TRBJ2-1	TRBV29	TRBJ2	CSVALAGGPNEQFF	TGCAGCGTTGCCCTAGCGGGGGGGCCGAATGAGCAGTTCTTC	:::::::::0::10:12::24:26:27::42:::
482	TGCAGCGTTGGACTAGCGGGGGGGCCGAATGAGCAGTTCTTC	TRBV29-1	TRBD2	TRBJ2-1	TRBV29	TRBJ2	CSVGLAGGPNEQFF	TGCAGCGTTGGACTAGCGGGGGGGCCGAATGAGCAGTTCTTC	:::::::::0::10:10::24:26:27::42:::
483	TGCAGCGTTGGGGAGGGGGTTGCCTACGAGCAGTACTTC	TRBV29-1	TRBD2	TRBJ2-7	TRBV29	TRBJ2	CSVGEGVAYEQYF	TGCAGCGTTGGGGAGGGGGTTGCCTACGAGCAGTACTTC	:::::::::0::10:10::17:17:22::39:::
484	TGCAGCGTTGGGGTCAAAACAGATACGCAGTATTTT	TRBV29-1		TRBJ2-3	TRBV29	TRBJ2	CSVGVKTDTQYF	TGCAGCGTTGGGGTCAAAACAGATACGCAGTATTTT	:::::::::0::10:::::18::36:::
485	TGCAGTGCAACGGGGAACCGGGGCACAGATACGCAGTATTTT	TRBV20-1	TRBD1	TRBJ2-3	TRBV20	TRBJ2	CSATGNRGTDTQYF	TGCAGTGCAACGGGGAACCGGGGCACAGATACGCAGTATTTT	:::::::::0::8:17:19::22:22::42:::
486	TGCAGTGCACCACTAGCGGGGGGGAACAATGAGCAGTTCTTC	TRBV29-1	TRBD2	TRBJ2-1	TRBV29	TRBJ2	CSAPLAGGNNEQFF	TGCAGTGCACCACTAGCGGGGGGGAACAATGAGCAGTTCTTC	:::::::::0::5:11::24:24:25::42:::
487	TGCAGTGCAGCGGGCCAGCGGGGGGCAGATACGCAGTATTTT	TRBV20-1	TRBD2	TRBJ2-3	TRBV20	TRBJ2	CSAAGQRGADTQYF	TGCAGTGCAGCGGGCCAGCGGGGGGCAGATACGCAGTATTTT	:::::::::0::8:10:11:25:25:25::42:::
488	TGCAGTGCATCGGGGGGCCGTGGCACAGATACGCAGTATTTT	TRBV20-1	TRBD2	TRBJ2-3	TRBV20	TRBJ2	CSASGGRGTDTQYF	TGCAGTGCATCGGGGGGCCGTGGCACAGATACGCAGTATTTT	:::::::::0::8:10::17:19:22::42:::
489	TGCAGTGCCAACAGGGGAGCCACTGAAGCTTTCTTT	TRBV20-1	TRBD1	TRBJ1-1	TRBV20	TRBJ1	CSANRGATEAFF	TGCAGTGCCAACAGGGGAGCCACTGAAGCTTTCTTT	:::::::::0::8:10:::17:20::36:::
490	TGCAGTGCCACGGGTACCTGGGTGATCGGCAAAGGTCATGGCTACACCTTC	TRBV20-1		TRBJ1-2	TRBV20	TRBJ1	CSATGTWVIGKGHGYTF	TGCAGTGCCACGGGTACCTGGGTGATCGGCAAAGGTCATGGCTACACCTTC	:::::::::0::8:::::37::51:::
491	TGCAGTGCCCCCCGGCGGCAGGATGAGCAGTTCTTC	TRBV20-1	TRBD1	TRBJ2-1	TRBV20	TRBJ2	CSAPRRQDEQFF	TGCAGTGCCCCCCGGCGGCAGGATGAGCAGTTCTTC	:::::::::0::8:10:13::22:22::36:::
492	TGCAGTGCCCCCGTGTACAGGGGTGCAGATACGCAGTATTTT	TRBV20-1	TRBD1	TRBJ2-3	TRBV20	TRBJ2	CSAPVYRGADTQYF	TGCAGTGCCCCCGTGTACAGGGGTGCAGATACGCAGTATTTT	:::::::::0::8:9:12::23:25::42:::
493	TGCAGTGCCCCGACTAGCGGGGGGGACAATGAGCAGTTCTTC	TRBV20-1	TRBD2	TRBJ2-1	TRBV20	TRBJ2	CSAPTSGGDNEQFF	TGCAGTGCCCCGACTAGCGGGGGGGACAATGAGCAGTTCTTC	:::::::::0::8:11::25:25:25::42:::
494	TGCAGTGCCCCGAGACGGACGGATGAGCAGTTCTTC	TRBV20-1	TRBD1	TRBJ2-1	TRBV20	TRBJ2	CSAPRRTDEQFF	TGCAGTGCCCCGAGACGGACGGATGAGCAGTTCTTC	:::::::::0::8:8:11::16:22::36:::
495	TGCAGTGCCCCTCTAGCGGGGGGGGGGAATGAGCAGTTCTTC	TRBV20-1	TRBD2	TRBJ2-1	TRBV20	TRBJ2	CSAPLAGGGNEQFF	TGCAGTGCCCCTCTAGCGGGGGGGGGGAATGAGCAGTTCTTC	:::::::::0::8:12::24:24:27::42:::
496	TGCAGTGCCCTAGGAAAGCCGGGCACAGATACGCAGTATTTT	TRBV20-1		TRBJ2-3	TRBV20	TRBJ2	CSALGKPGTDTQYF	TGCAGTGCCCTAGGAAAGCCGGGCACAGATACGCAGTATTTT	:::::::::0::8:::::22::42:::
497	TGCAGTGCCCTAGGAAAGCGGGGCACAGATACGCAGTATTTT	TRBV20-1	TRBD2	TRBJ2-3	TRBV20	TRBJ2	CSALGKRGTDTQYF	TGCAGTGCCCTAGGAAAGCGGGGCACAGATACGCAGTATTTT	:::::::::0::8:16:::22:22::42:::
498	TGCAGTGCCGCGGGGGGCCGCGGCACAGATACGCAGTATTTT	TRBV20-1	TRBD2	TRBJ2-3	TRBV20	TRBJ2	CSAAGGRGTDTQYF	TGCAGTGCCGCGGGGGGCCGCGGCACAGATACGCAGTATTTT	:::::::::0::8:9::17:19:22::42:::
499	TGCAGTGCCGGAGGTGAACTAGCGGATACCTACGAGCAGTACGTC	TRBV20-1	TRBD2	TRBJ2-7	TRBV20	TRBJ2	CSAGGELADTYEQYV	TGCAGTGCCGGAGGTGAACTAGCGGATACCTACGAGCAGTACGTC	:::::::::0::8:17:::25:28::45:::
500	TGCAGTGCCGGGTTGGGCCTCCCCTACGAGCAGTACTTC	TRBV20-1	TRBD2	TRBJ2-7	TRBV20	TRBJ2	CSAGLGLPYEQYF	TGCAGTGCCGGGTTGGGCCTCCCCTACGAGCAGTACTTC	:::::::::0::8:8::16:22:22::39:::
501	TGCAGTGCCTTAGGAGCCCATGTAAATGAAAAACTGTTTTTT	TRBV20-1		TRBJ1-4	TRBV20	TRBJ1	CSALGAHVNEKLFF	TGCAGTGCCTTAGGAGCCCATGTAAATGAAAAACTGTTTTTT	:::::::::0::8:::::24::42:::
502	TGCAGTGCGCCGACTAGCGGGGGGGCGAATGAGCAGTTCTTC	TRBV20-1	TRBD2	TRBJ2-1	TRBV20	TRBJ2	CSAPTSGGANEQFF	TGCAGTGCGCCGACTAGCGGGGGGGCGAATGAGCAGTTCTTC	:::::::::0::8:11::25:26:27::42:::
503	TGCAGTGCTAACGGCGGGACTGTTTCCAATGAGCAGTTCTTC	TRBV20-1	TRBD2	TRBJ2-1	TRBV20	TRBJ2	CSANGGTVSNEQFF	TGCAGTGCTAACGGCGGGACTGTTTCCAATGAGCAGTTCTTC	:::::::::0::10:14:15::21:26::42:::
504	TGCAGTGCTACATCTCTAGCGGGGGGGGTTGGGGCCAACGTCCTGACTTTC	TRBV20-1	TRBD1	TRBJ2-6	TRBV20	TRBJ2	CSATSLAGGVGANVLTF	TGCAGTGCTACATCTCTAGCGGGGGGGGTTGGGGCCAACGTCCTGACTTTC	:::::::::0:12:20:20:::25:29::51:::
505	TGCAGTGCTACGCCAGGGTACGGTCAGCCCCAGCATTTT	TRBV20-1	TRBD1	TRBJ1-5	TRBV20	TRBJ1	CSATPGYGQPQHF	TGCAGTGCTACGCCAGGGTACGGTCAGCCCCAGCATTTT	:::::::::0::10:13:::18:23::39:::
506	TGCAGTGCTAGAGATCCTCATGGACAAGGCTACACCTTC	TRBV20-1	TRBD1	TRBJ1-2	TRBV20	TRBJ1	CSARDPHGQGYTF	TGCAGTGCTAGAGATCCTCATGGACAAGGCTACACCTTC	:::::::::0:14:16:21:::26:27::39:::
507	TGCAGTGCTAGCACTAGAGGAGTGAACACTGAAGCTTTCTTT	TRBV20-1	TRBD2	TRBJ1-1	TRBV20	TRBJ1	CSASTRGVNTEAFF	TGCAGTGCTAGCACTAGAGGAGTGAACACTGAAGCTTTCTTT	:::::::::0::11:12:::20:22:22:42:::
508	TGCAGTGCTAGCCTTAGCGGGGGGGCCGGGGGTGAGCAGTTCTTC	TRBV20-1	TRBD2	TRBJ2-1	TRBV20	TRBJ2	CSASLSGGAGGEQFF	TGCAGTGCTAGCCTTAGCGGGGGGGCCGGGGGTGAGCAGTTCTTC	:::::::::0::11:14::25:27:32::45:::
509	TGCAGTGCTAGCTCCCCGGCAGATACGCAGTATTTT	TRBV20-1	TRBD1	TRBJ2-3	TRBV20	TRBJ2	CSASSPADTQYF	TGCAGTGCTAGCTCCCCGGCAGATACGCAGTATTTT	:::::::::0::11:14:17::19:19::36:::
510	TGCAGTGCTAGTCCCGGGAGGATCGCTTACGAGCAGTACTTC	TRBV20-1	TRBD1	TRBJ2-7	TRBV20	TRBJ2	CSASPGRIAYEQYF	TGCAGTGCTAGTCCCGGGAGGATCGCTTACGAGCAGTACTTC	:::::::::0::11:11:15::18:18:23:42:::
511	TGCAGTGCTAGTGAAGGGACTAGCGGGGGGGCGTACGAGCAGTACGTC	TRBV20-1	TRBD2	TRBJ2-7	TRBV20	TRBJ2	CSASEGTSGGAYEQYV	TGCAGTGCTAGTGAAGGGACTAGCGGGGGGGCGTACGAGCAGTACGTC	:::::::::0:14:14:15:15:31:32:33::48:::
512	TGCAGTGCTAGTGGGGGGCGCGGGACAGATACGCAGTATTTT	TRBV20-1	TRBD1	TRBJ2-3	TRBV20	TRBJ2	CSASGGRGTDTQYF	TGCAGTGCTAGTGGGGGGCGCGGGACAGATACGCAGTATTTT	:::::::::0::11:13::19:21:24::42:::
513	TGCAGTGCTCCCAGGGGGACGAACTACGAGCAGTACTTC	TRBV20-1	TRBD1	TRBJ2-7	TRBV20	TRBJ2	CSAPRGTNYEQYF	TGCAGTGCTCCCAGGGGGACGAACTACGAGCAGTACTTC	:::::::::0::9:11:::18:23::39:::
514	TGCAGTGCTCCCGGGGAGCGGGGGGCTGATACGCAGTATTTT	TRBV20-1	TRBD2	TRBJ2-3	TRBV20	TRBJ2	CSAPGERGADTQYF	TGCAGTGCTCCCGGGGAGCGGGGGGCTGATACGCAGTATTTT	:::::::::0::9:16::25:26:27::42:::
515	TGCAGTGCTCCCTGGGGCGCGGGGACTGAAGCTTTCTTT	TRBV20-1	TRBD1	TRBJ1-1	TRBV20	TRBJ1	CSAPWGAGTEAFF	TGCAGTGCTCCCTGGGGCGCGGGGACTGAAGCTTTCTTT	:::::::::0::9:13::18:20:24::39:::
516	TGCAGTGCTCCGACTGGCGCCGGGTCCAACGAGCAGTACTTC	TRBV20-1	TRBD1	TRBJ2-7	TRBV20	TRBJ2	CSAPTGAGSNEQYF	TGCAGTGCTCCGACTGGCGCCGGGTCCAACGAGCAGTACTTC	:::::::::0::9:15::18:21:24::42:::
517	TGCAGTGCTCCGACTGGCGTCGGGTCCAACGAGCAGTACTTC	TRBV20-1	TRBD2	TRBJ2-7	TRBV20	TRBJ2	CSAPTGVGSNEQYF	TGCAGTGCTCCGACTGGCGTCGGGTCCAACGAGCAGTACTTC	:::::::::0::9:11:::19:24::42:::
518	TGCAGTGCTCCGATTGGCGAGGGGTCCAACGAGCAGTACTTC	TRBV20-1	TRBD1	TRBJ2-7	TRBV20	TRBJ2	CSAPIGEGSNEQYF	TGCAGTGCTCCGATTGGCGAGGGGTCCAACGAGCAGTACTTC	:::::::::0::9:19:::24:24::42:::
519	TGCAGTGCTGGATCCGGGACAGCCTACGAGCAGTACTTC	TRBV20-1	TRBD1	TRBJ2-7	TRBV20	TRBJ2	CSAGSGTAYEQYF	TGCAGTGCTGGATCCGGGACAGCCTACGAGCAGTACTTC	:::::::::0::12:13:15::22:22::39:::
520	TGCAGTGCTGGCACAAGGTTCCTTAATTCACCCATCCACTTT	TRBV20-1		TRBJ1-6	TRBV20	TRBJ1	CSAGTRFLNSPIHF	TGCAGTGCTGGCACAAGGTTCCTTAATTCACCCATCCACTTT	:::::::::0::9:::::19::42:::
521	TGCAGTGCTGGGGAGACAGGGGGCCAGCCCCAGCATTTT	TRBV20-1	TRBD1	TRBJ1-5	TRBV20	TRBJ1	CSAGETGGQPQHF	TGCAGTGCTGGGGAGACAGGGGGCCAGCCCCAGCATTTT	:::::::::0::9:14::24:24:24::39:::
522	TGCAGTGCTGGGGAGGGCGAGGGCCAGCCCCAGCATTTT	TRBV20-1	TRBD2	TRBJ1-5	TRBV20	TRBJ1	CSAGEGEGQPQHF	TGCAGTGCTGGGGAGGGCGAGGGCCAGCCCCAGCATTTT	:::::::::0::9:10::17:18:24::39:::
523	TGCAGTGCTGGTACAGGGTTCCTTAATTCACCCCTCCACTTT	TRBV20-1	TRBD1	TRBJ1-6	TRBV20	TRBJ1	CSAGTGFLNSPLHF	TGCAGTGCTGGTACAGGGTTCCTTAATTCACCCCTCCACTTT	:::::::::0::9:9:9::18:19::42:::
524	TGCAGTGCTGGTACAGGGTTCCTTAATTCCCCCCTCCACTTT	TRBV20-1	TRBD1	TRBJ1-6	TRBV20	TRBJ1	CSAGTGFLNSPLHF	TGCAGTGCTGGTACAGGGTTCCTTAATTCCCCCCTCCACTTT	:::::::::0::9:9:9::18:19::42:::
525	TGCAGTGCTGTAGGGATTAGGGGCACAGATACGCAGTATTTT	TRBV20-1	TRBD2	TRBJ2-3	TRBV20	TRBJ2	CSAVGIRGTDTQYF	TGCAGTGCTGTAGGGATTAGGGGCACAGATACGCAGTATTTT	:::::::::0::9:12:12::20:22::42:::
526	TGCAGTGCTTCCATGGAGGCAGCCAGCACCTACGAGCAGTACTTC	TRBV20-1	TRBD2	TRBJ2-7	TRBV20	TRBJ2	CSASMEAASTYEQYF	TGCAGTGCTTCCATGGAGGCAGCCAGCACCTACGAGCAGTACTTC	:::::::::0::9:14:::19:24:26:45:::
527	TGCAGTGCTTCGATGGAGGCAGCCAGCACTTACGAGCAGTACTTC	TRBV20-1	TRBD2	TRBJ2-7	TRBV20	TRBJ2	CSASMEAASTYEQYF	TGCAGTGCTTCGATGGAGGCAGCCAGCACTTACGAGCAGTACTTC	:::::::::0::9:14:::19:24:26:45:::
528	TGCAGTGCTTCGGACAGGCACTACGAGCAGTACTTC	TRBV20-1	TRBD1	TRBJ2-7	TRBV20	TRBJ2	CSASDRHYEQYF	TGCAGTGCTTCGGACAGGCACTACGAGCAGTACTTC	:::::::::0::9:11:::18:20::36:::
529	TGCAGTGCTTCTATGGGGGCAGCCAGTACTTACGAGCAGTACTTC	TRBV20-1	TRBD1	TRBJ2-7	TRBV20	TRBJ2	CSASMGAASTYEQYF	TGCAGTGCTTCTATGGGGGCAGCCAGTACTTACGAGCAGTACTTC	:::::::::0::9:14::21:24:30::45:::
530	TGCAGTGGGCAGCCCGAAAGCTCCTACGAGCAGTACTTC	TRBV20-1		TRBJ2-7	TRBV20	TRBJ2	CSGQPESSYEQYF	TGCAGTGGGCAGCCCGAAAGCTCCTACGAGCAGTACTTC	:::::::::0::7:::::18:20:39:::
531	TGCAGTGTTCAAGATTTTCGCACTGAAGCTTTCTTT	TRBV29-1		TRBJ1-1	TRBV29	TRBJ1	CSVQDFRTEAFF	TGCAGTGTTCAAGATTTTCGCACTGAAGCTTTCTTT	:::::::::0:14:19:::::20::36:::
532	TGCAGTGTTCCGACTCGCGGGGGGGAAAACAATCAGTACTTC	TRBV20-1	TRBD2	TRBJ2-4	TRBV20	TRBJ2	CSVPTRGGENNQYF	TGCAGTGTTCCGACTCGCGGGGGGGAAAACAATCAGTACTTC	:::::::::0::7:11::25:25:25::42:::
533	TGCAGTTCCAACAGGGGGGCTAATGAAGCTTTCTTT	TRBV20-1	TRBD1	TRBJ1-1	TRBV20	TRBJ1	CSSNRGANEAFF	TGCAGTTCCAACAGGGGGGCTAATGAAGCTTTCTTT	:::::::::0::6:10:::18:23::36:::
534	TGCATTGCCTCGAGACGGCTGGATGAGCAGTTCTTC	TRBV20-1		TRBJ2-1	TRBV20	TRBJ2	CIASRRLDEQFF	TGCATTGCCTCGAGACGGCTGGATGAGCAGTTCTTC	:::::::::0:15:15:::::22::36:::
535	TGCGACAGCAGCCAAGGACAGGGGTATGAAGCTTTCTTT	TRBV4-1	TRBD1	TRBJ1-1	TRBV4	TRBJ1	CDSSQGQGYEAFF	TGCGACAGCAGCCAAGGACAGGGGTATGAAGCTTTCTTT	:::::::::0::16:16:::24:26::39:::
536	TGCGACAGCAGCCCCTCCCGCACGGGGGCGTACGAGCAGTACTTC	TRBV4-3	TRBD2	TRBJ2-7	TRBV4	TRBJ2	CDSSPSRTGAYEQYF	TGCGACAGCAGCCCCTCCCGCACGGGGGCGTACGAGCAGTACTTC	:::::::::0::13:13:::21:30::45:::
537	TGCGCCACACGACAGGGGGCAGCCTACGAGCAGTACTTC	TRBV10-2	TRBD1	TRBJ2-7	TRBV10	TRBJ2	CATRQGAAYEQYF	TGCGCCACACGACAGGGGGCAGCCTACGAGCAGTACTTC	:::::::::0::7:10::20:20:22::39:::
538	TGCGCCACTAGCTCCTCACAGGGCTACGAGCAGTACTTC	TRBV4-3	TRBD1	TRBJ2-7	TRBV4	TRBJ2	CATSSSQGYEQYF	TGCGCCACTAGCTCCTCACAGGGCTACGAGCAGTACTTC	:::::::::0::7:17:::23:23::39:::
539	TGCGCCAGAAGCCAAACCTCGACAGGCGCCTATGGCTACACCTTC	TRBV4-3	TRBD1	TRBJ1-2	TRBV4	TRBJ1	CARSQTSTGAYGYTF	TGCGCCAGAAGCCAAACCTCGACAGGCGCCTATGGCTACACCTTC	:::::::::0::15:20:::26:29::45:::
540	TGCGCCAGCACCCCCGACTCAGGGACAGGTGAGCAGTTCTTC	TRBV4-3	TRBD1	TRBJ2-1	TRBV4	TRBJ2	CASTPDSGTGEQFF	TGCGCCAGCACCCCCGACTCAGGGACAGGTGAGCAGTTCTTC	:::::::::0::13:21:21::29:29::42:::
541	TGCGCCAGCAGAACGGACAGGGTGAGGTATGGCTACACCTTC	TRBV5-1	TRBD1	TRBJ1-2	TRBV5	TRBJ1	CASRTDRVRYGYTF	TGCGCCAGCAGAACGGACAGGGTGAGGTATGGCTACACCTTC	:::::::::0::11:14:::22:27::42:::
542	TGCGCCAGCAGAGTGAAGGGGGCTAGGCAAGATACGCAGTATTTT	TRBV10-1	TRBD1	TRBJ2-3	TRBV10	TRBJ2	CASRVKGARQDTQYF	TGCGCCAGCAGAGTGAAGGGGGCTAGGCAAGATACGCAGTATTTT	:::::::::0::11:16:::21:21:24:45:::
543	TGCGCCAGCAGAGTGAAGGGGGCTAGGCAGGATACGCAGTATTTT	TRBV10-1	TRBD1	TRBJ2-3	TRBV10	TRBJ2	CASRVKGARQDTQYF	TGCGCCAGCAGAGTGAAGGGGGCTAGGCAGGATACGCAGTATTTT	:::::::::0::11:16:::21:21:24:45:::
544	TGCGCCAGCAGCAACGGGACGGCCTATGGCTACACCTTC	TRBV5-1	TRBD2	TRBJ1-2	TRBV5	TRBJ1	CASSNGTAYGYTF	TGCGCCAGCAGCAACGGGACGGCCTATGGCTACACCTTC	:::::::::0::12:14::22:23:23::39:::
545	TGCGCCAGCAGCACCTCACAGGCCTACGAGCAGTACTTC	TRBV4-3	TRBD1	TRBJ2-7	TRBV4	TRBJ2	CASSTSQAYEQYF	TGCGCCAGCAGCACCTCACAGGCCTACGAGCAGTACTTC	:::::::::0::12:17:::22:22::39:::
546	TGCGCCAGCAGCACCTCCTCGACAGGGGCCTATGGCTACACCTTC	TRBV5-1	TRBD1	TRBJ1-2	TRBV5	TRBJ1	CASSTSSTGAYGYTF	TGCGCCAGCAGCACCTCCTCGACAGGGGCCTATGGCTACACCTTC	:::::::::0::12:20:::28:29::45:::
547	TGCGCCAGCAGCCAAACAACGGCTCCAACCTACGAGCAGTACTTC	TRBV4-3		TRBJ2-7	TRBV4	TRBJ2	CASSQTTAPTYEQYF	TGCGCCAGCAGCCAAACAACGGCTCCAACCTACGAGCAGTACTTC	:::::::::0::15:::::28::45:::
548	TGCGCCAGCAGCCAAACAGTGCCCTACGAGCAGTACTTC	TRBV4-1		TRBJ2-7	TRBV4	TRBJ2	CASSQTVPYEQYF	TGCGCCAGCAGCCAAACAGTGCCCTACGAGCAGTACTTC	:::::::::0::15:::::22::39:::
549	TGCGCCAGCAGCCAAACCCTCTCCTACGAGCAGTACTTC	TRBV4-1		TRBJ2-7	TRBV4	TRBJ2	CASSQTLSYEQYF	TGCGCCAGCAGCCAAACCCTCTCCTACGAGCAGTACTTC	:::::::::0::15:::::20:20:39:::
550	TGCGCCAGCAGCCAAACCGAAGGGGGTGCTTATGGCTACACCTTC	TRBV4-3	TRBD1	TRBJ1-2	TRBV4	TRBJ1	CASSQTEGGAYGYTF	TGCGCCAGCAGCCAAACCGAAGGGGGTGCTTATGGCTACACCTTC	:::::::::0::15:20::27:29:30::45:::
551	TGCGCCAGCAGCCAAACCTCGACAGGCGCCTATGGCTACACCTTC	TRBV4-3	TRBD1	TRBJ1-2	TRBV4	TRBJ1	CASSQTSTGAYGYTF	TGCGCCAGCAGCCAAACCTCGACAGGCGCCTATGGCTACACCTTC	:::::::::0::15:20:::26:29::45:::
552	TGCGCCAGCAGCCAAAGGGACTCCGGACAGGATGGCTACACCTTC	TRBV4-1	TRBD1	TRBJ1-2	TRBV4	TRBJ1	CASSQRDSGQDGYTF	TGCGCCAGCAGCCAAAGGGACTCCGGACAGGATGGCTACACCTTC	:::::::::0::15:24:::31:31::45:::
553	TGCGCCAGCAGCCAACCAACCGGGACAGCTTATGGCTACACCTTC	TRBV4-3	TRBD1	TRBJ1-2	TRBV4	TRBJ1	CASSQPTGTAYGYTF	TGCGCCAGCAGCCAACCAACCGGGACAGCTTATGGCTACACCTTC	:::::::::0::15:19:21::28:30::45:::
554	TGCGCCAGCAGCCAAGAAATGGCGACGGTCTACGAGCAGTACTTC	TRBV4-3		TRBJ2-7	TRBV4	TRBJ2	CASSQEMATVYEQYF	TGCGCCAGCAGCCAAGAAATGGCGACGGTCTACGAGCAGTACTTC	:::::::::0:17:17:::::29::45:::
555	TGCGCCAGCAGCCAAGAACTGACCTACGAGCAGTACTTC	TRBV4-1		TRBJ2-7	TRBV4	TRBJ2	CASSQELTYEQYF	TGCGCCAGCAGCCAAGAACTGACCTACGAGCAGTACTTC	:::::::::0:17:20:::::22::39:::
556	TGCGCCAGCAGCCAAGAAGCCGCGACAGGGGTTAGCTATGGCTACACCTTC	TRBV4-3	TRBD1	TRBJ1-2	TRBV4	TRBJ1	CASSQEAATGVSYGYTF	TGCGCCAGCAGCCAAGAAGCCGCGACAGGGGTTAGCTATGGCTACACCTTC	:::::::::0:17:17:19:21::31:32::51:::
557	TGCGCCAGCAGCCAAGACAGGTCCACCGGGGAGCTGTTTTTT	TRBV4-1		TRBJ2-2	TRBV4	TRBJ2	CASSQDRSTGELFF	TGCGCCAGCAGCCAAGACAGGTCCACCGGGGAGCTGTTTTTT	:::::::::0:17:17:::::23::42:::
558	TGCGCCAGCAGCCAAGACAGGTCCATCGGGGAGCTGTTTTTT	TRBV4-1		TRBJ2-2	TRBV4	TRBJ2	CASSQDRSIGELFF	TGCGCCAGCAGCCAAGACAGGTCCATCGGGGAGCTGTTTTTT	:::::::::0:17:17:::::23::42:::
559	TGCGCCAGCAGCCAAGACGGGCGGACAGGGGGCGCCTATGGCTACACCTTC	TRBV4-3	TRBD1	TRBJ1-2	TRBV4	TRBJ1	CASSQDGRTGGAYGYTF	TGCGCCAGCAGCCAAGACGGGCGGACAGGGGGCGCCTATGGCTACACCTTC	:::::::::0:17:17:22::33:35:35::51:::
560	TGCGCCAGCAGCCAAGATAACAACCCGGGCTATGGCTACACCTTC	TRBV4-3	TRBD1	TRBJ1-2	TRBV4	TRBJ1	CASSQDNNPGYGYTF	TGCGCCAGCAGCCAAGATAACAACCCGGGCTATGGCTACACCTTC	:::::::::0:17:18:23:26::29:29::45:::
561	TGCGCCAGCAGCCAAGATAACCATGTCAGGGACGGGGAAAAACTGTTTTTT	TRBV4-3	TRBD1	TRBJ1-4	TRBV4	TRBJ1	CASSQDNHVRDGEKLFF	TGCGCCAGCAGCCAAGATAACCATGTCAGGGACGGGGAAAAACTGTTTTTT	:::::::::0:17:18:28:28::36:36::51:::
562	TGCGCCAGCAGCCAAGATAACGGGAGGGAGCAGTTCTTC	TRBV4-1	TRBD2	TRBJ2-1	TRBV4	TRBJ2	CASSQDNGREQFF	TGCGCCAGCAGCCAAGATAACGGGAGGGAGCAGTTCTTC	:::::::::0:17:18:20:::27:27::39:::
563	TGCGCCAGCAGCCAAGATACCCCTCAGCCCCAGCATTTT	TRBV4-1		TRBJ1-5	TRBV4	TRBJ1	CASSQDTPQPQHF	TGCGCCAGCAGCCAAGATACCCCTCAGCCCCAGCATTTT	:::::::::0:17:18:::::23::39:::
564	TGCGCCAGCAGCCAAGATCAAGGCGGACAGGGGGCCTATGGCTACACCTTC	TRBV4-3	TRBD1	TRBJ1-2	TRBV4	TRBJ1	CASSQDQGGQGAYGYTF	TGCGCCAGCAGCCAAGATCAAGGCGGACAGGGGGCCTATGGCTACACCTTC	:::::::::0:17:19:24::35:35:35::51:::
565	TGCGCCAGCAGCCAAGATCTGGTAACAGCCTATGGCTACACCTTC	TRBV4-3		TRBJ1-2	TRBV4	TRBJ1	CASSQDLVTAYGYTF	TGCGCCAGCAGCCAAGATCTGGTAACAGCCTATGGCTACACCTTC	:::::::::0:17:20:::::29::45:::
566	TGCGCCAGCAGCCAAGATCTTACAGGGGGCGCGTACGAGCAGTACTTC	TRBV4-3	TRBD1	TRBJ2-7	TRBV4	TRBJ2	CASSQDLTGGAYEQYF	TGCGCCAGCAGCCAAGATCTTACAGGGGGCGCGTACGAGCAGTACTTC	:::::::::0:17:21:21::30:32:33::48:::
567	TGCGCCAGCAGCCAAGATGAAGTAAGGGGGGCCTATGGCTACACCTTC	TRBV4-3	TRBD1	TRBJ1-2	TRBV4	TRBJ1	CASSQDEVRGAYGYTF	TGCGCCAGCAGCCAAGATGAAGTAAGGGGGGCCTATGGCTACACCTTC	:::::::::0:17:18:24:::30:32::48:::
568	TGCGCCAGCAGCCAAGATTCCGGGACAGGGGCTTACGAGAAGTACTTC	TRBV4-1	TRBD1	TRBJ2-7	TRBV4	TRBJ2	CASSQDSGTGAYEKYF	TGCGCCAGCAGCCAAGATTCCGGGACAGGGGCTTACGAGAAGTACTTC	:::::::::0:17:18:19:21::31:33::48:::
569	TGCGCCAGCAGCCAAGATTCCGGGACAGGGGCTTACGAGCAGTACTTC	TRBV4-1	TRBD1	TRBJ2-7	TRBV4	TRBJ2	CASSQDSGTGAYEQYF	TGCGCCAGCAGCCAAGATTCCGGGACAGGGGCTTACGAGCAGTACTTC	:::::::::0:17:18:19:21::31:33::48:::
570	TGCGCCAGCAGCCAAGATTCCGGGACTGGGGCCTACGAGCAGTACTTC	TRBV4-1	TRBD1	TRBJ2-7	TRBV4	TRBJ2	CASSQDSGTGAYEQYF	TGCGCCAGCAGCCAAGATTCCGGGACTGGGGCCTACGAGCAGTACTTC	:::::::::0:17:18:19:21::31:31::48:::
571	TGCGCCAGCAGCCAAGATTTCGCTGGAGGGAGCTATGGCTACACCTTC	TRBV4-3	TRBD2	TRBJ1-2	TRBV4	TRBJ1	CASSQDFAGGSYGYTF	TGCGCCAGCAGCCAAGATTTCGCTGGAGGGAGCTATGGCTACACCTTC	:::::::::0:17:25:27:::32:32::48:::
572	TGCGCCAGCAGCCAAGATTTCGGTGGAGGGAGCTATGGCTACACCTTC	TRBV4-3	TRBD2	TRBJ1-2	TRBV4	TRBJ1	CASSQDFGGGSYGYTF	TGCGCCAGCAGCCAAGATTTCGGTGGAGGGAGCTATGGCTACACCTTC	:::::::::0:17:18:24::30:30:32::48:::
573	TGCGCCAGCAGCCAAGCAACCGGAACAGCTTATGGCTACACCTTC	TRBV4-3	TRBD1	TRBJ1-2	TRBV4	TRBJ1	CASSQATGTAYGYTF	TGCGCCAGCAGCCAAGCAACCGGAACAGCTTATGGCTACACCTTC	:::::::::0::16:19:21::28:30::45:::
574	TGCGCCAGCAGCCAAGCAACCGGGACAGCTTATGGCTACACCTTC	TRBV4-3	TRBD1	TRBJ1-2	TRBV4	TRBJ1	CASSQATGTAYGYTF	TGCGCCAGCAGCCAAGCAACCGGGACAGCTTATGGCTACACCTTC	:::::::::0::16:19:21::28:30::45:::
575	TGCGCCAGCAGCCAAGCAGGGAACGGGTACGAGCAGTACTTC	TRBV4-3	TRBD1	TRBJ2-7	TRBV4	TRBJ2	CASSQAGNGYEQYF	TGCGCCAGCAGCCAAGCAGGGAACGGGTACGAGCAGTACTTC	:::::::::0::16:16:::21:27::42:::
576	TGCGCCAGCAGCCAAGCGACAGCCTACGAGCAGTACGTC	TRBV4-1	TRBD1	TRBJ2-7	TRBV4	TRBJ2	CASSQATAYEQYV	TGCGCCAGCAGCCAAGCGACAGCCTACGAGCAGTACGTC	:::::::::0::16:17:::22:22::39:::
577	TGCGCCAGCAGCCAAGCTTCGCTGGCGGGTAACACCGGGGAGCTGTTTTTT	TRBV4-3	TRBD2	TRBJ2-2	TRBV4	TRBJ2	CASSQASLAGNTGELFF	TGCGCCAGCAGCCAAGCTTCGCTGGCGGGTAACACCGGGGAGCTGTTTTTT	:::::::::0:16:24:24:::29:30::51:::
578	TGCGCCAGCAGCCAAGGACAGGCCTACGAGCAGTACTTC	TRBV4-1	TRBD1	TRBJ2-7	TRBV4	TRBJ2	CASSQGQAYEQYF	TGCGCCAGCAGCCAAGGACAGGCCTACGAGCAGTACTTC	:::::::::0::16:16:::22:22::39:::
579	TGCGCCAGCAGCCAAGGACAGGGGTATGAAGCTTTCTTT	TRBV4-1	TRBD1	TRBJ1-1	TRBV4	TRBJ1	CASSQGQGYEAFF	TGCGCCAGCAGCCAAGGACAGGGGTATGAAGCTTTCTTT	:::::::::0::16:16:::24:26::39:::
580	TGCGCCAGCAGCCAAGGAGGCTATGGCTACACCTTC	TRBV4-3		TRBJ1-2	TRBV4	TRBJ1	CASSQGGYGYTF	TGCGCCAGCAGCCAAGGAGGCTATGGCTACACCTTC	:::::::::0::16:::::20::36:::
581	TGCGCCAGCAGCCAAGGCCTCCCAGGGGACATCCGGGAAAAACTGTTTTTT	TRBV4-3	TRBD1	TRBJ1-4	TRBV4	TRBJ1	CASSQGLPGDIREKLFF	TGCGCCAGCAGCCAAGGCCTCCCAGGGGACATCCGGGAAAAACTGTTTTTT	:::::::::0::16:25:25::31:36::51:::
582	TGCGCCAGCAGCCAAGGCGAAACGGCAACCACCGGGGAGCTGTTTTTT	TRBV4-3		TRBJ2-2	TRBV4	TRBJ2	CASSQGETATTGELFF	TGCGCCAGCAGCCAAGGCGAAACGGCAACCACCGGGGAGCTGTTTTTT	:::::::::0::16:::::29::48:::
583	TGCGCCAGCAGCCAAGGCGGGACAGCGGCATATGGCTACACCTTC	TRBV4-3	TRBD2	TRBJ1-2	TRBV4	TRBJ1	CASSQGGTAAYGYTF	TGCGCCAGCAGCCAAGGCGGGACAGCGGCATATGGCTACACCTTC	:::::::::0::16:17:18::28:30::45:::
584	TGCGCCAGCAGCCAAGGCGGGACAGCGGCATATGGCTACTCCTTC	TRBV4-3	TRBD2	TRBJ1-2	TRBV4	TRBJ1	CASSQGGTAAYGYSF	TGCGCCAGCAGCCAAGGCGGGACAGCGGCATATGGCTACTCCTTC	:::::::::0::16:17:18::28:30::45:::
585	TGCGCCAGCAGCCAAGGGACAGGGAACGTCGGCTACGAGCAGTACTTC	TRBV4-3	TRBD1	TRBJ2-7	TRBV4	TRBJ2	CASSQGTGNVGYEQYF	TGCGCCAGCAGCCAAGGGACAGGGAACGTCGGCTACGAGCAGTACTTC	:::::::::0::16:16:::24:32::48:::
586	TGCGCCAGCAGCCAAGGGTCGGACAGGGGGCAGGACGAGCAGTACTTC	TRBV4-3	TRBD1	TRBJ2-7	TRBV4	TRBJ2	CASSQGSDRGQDEQYF	TGCGCCAGCAGCCAAGGGTCGGACAGGGGGCAGGACGAGCAGTACTTC	:::::::::0::16:20::31:31:34::48:::
587	TGCGCCAGCAGCCAAGTAACAGGGGGAAGATATGGCTACACCTTC	TRBV4-3	TRBD1	TRBJ1-2	TRBV4	TRBJ1	CASSQVTGGRYGYTF	TGCGCCAGCAGCCAAGTAACAGGGGGAAGATATGGCTACACCTTC	:::::::::0::16:18:::26:30::45:::
588	TGCGCCAGCAGCCAAGTAACAGGGGGAAGCTATGGCTACACCTTC	TRBV4-3	TRBD1	TRBJ1-2	TRBV4	TRBJ1	CASSQVTGGSYGYTF	TGCGCCAGCAGCCAAGTAACAGGGGGAAGCTATGGCTACACCTTC	:::::::::0::16:18:::26:29::45:::
589	TGCGCCAGCAGCCAAGTAACGGAGACAGGGCCGTATGGCTACACCTTC	TRBV4-3	TRBD1	TRBJ1-2	TRBV4	TRBJ1	CASSQVTETGPYGYTF	TGCGCCAGCAGCCAAGTAACGGAGACAGGGCCGTATGGCTACACCTTC	:::::::::0::16:19:20::30:33::48:::
590	TGCGCCAGCAGCCAAGTCCGACAGGGGGCTTCTGGCTACACCTTC	TRBV4-3	TRBD1	TRBJ1-2	TRBV4	TRBJ1	CASSQVRQGASGYTF	TGCGCCAGCAGCCAAGTCCGACAGGGGGCTTCTGGCTACACCTTC	:::::::::0::16:19::29:29:32::45:::
591	TGCGCCAGCAGCCAATCTGACGTCGGCAATCAGCCCCAGCATTTT	TRBV4-3		TRBJ1-5	TRBV4	TRBJ1	CASSQSDVGNQPQHF	TGCGCCAGCAGCCAATCTGACGTCGGCAATCAGCCCCAGCATTTT	:::::::::0::15:::::25::45:::
592	TGCGCCAGCAGCCACTCAAAGGCCACTGAAGCTTTCTTT	TRBV4-3		TRBJ1-1	TRBV4	TRBJ1	CASSHSKATEAFF	TGCGCCAGCAGCCACTCAAAGGCCACTGAAGCTTTCTTT	:::::::::0::14:::::23::39:::
593	TGCGCCAGCAGCCACTGGACGGCCTATGGCTACACCTTC	TRBV5-1		TRBJ1-2	TRBV5	TRBJ1	CASSHWTAYGYTF	TGCGCCAGCAGCCACTGGACGGCCTATGGCTACACCTTC	:::::::::0::12:::::23::39:::
594	TGCGCCAGCAGCCAGACAGAGACAGGGGGCTATGGCTACACCTTC	TRBV4-3	TRBD1	TRBJ1-2	TRBV4	TRBJ1	CASSQTETGGYGYTF	TGCGCCAGCAGCCAGACAGAGACAGGGGGCTATGGCTACACCTTC	:::::::::0::14:20:::29:29::45:::
595	TGCGCCAGCAGCCAGCTAGCTACGAGCTCCTACGAGCAGTACTTC	TRBV4-3	TRBD2	TRBJ2-7	TRBV4	TRBJ2	CASSQLATSSYEQYF	TGCGCCAGCAGCCAGCTAGCTACGAGCTCCTACGAGCAGTACTTC	:::::::::0::14:14:::19:20:26:45:::
596	TGCGCCAGCAGCCAGTACAGGGGTAACACTGAAGCTTTCTTT	TRBV4-1	TRBD1	TRBJ1-1	TRBV4	TRBJ1	CASSQYRGNTEAFF	TGCGCCAGCAGCCAGTACAGGGGTAACACTGAAGCTTTCTTT	:::::::::0::14:16:::23:24::42:::
597	TGCGCCAGCAGCCAGTTTGTGAGCTCCTACGAGCAGTACTTC	TRBV4-3		TRBJ2-7	TRBV4	TRBJ2	CASSQFVSSYEQYF	TGCGCCAGCAGCCAGTTTGTGAGCTCCTACGAGCAGTACTTC	:::::::::0::14:::::20:23:42:::
598	TGCGCCAGCAGCCATCTCGCCGGGGGGGCGGGTGAGCAGTTCTTC	TRBV4-1	TRBD1	TRBJ2-1	TRBV4	TRBJ2	CASSHLAGGAGEQFF	TGCGCCAGCAGCCATCTCGCCGGGGGGGCGGGTGAGCAGTTCTTC	:::::::::0::14:23::29:30:32::45:::
599	TGCGCCAGCAGCCATGCCGGGCAGGCGACTTTCTTT	TRBV4-1	TRBD1	TRBJ1-1	TRBV4	TRBJ1	CASSHAGQATFF	TGCGCCAGCAGCCATGCCGGGCAGGCGACTTTCTTT	:::::::::0::14:16:18::25:28::36:::
600	TGCGCCAGCAGCCATGGCGGGCAGGCGACTTTCTTT	TRBV4-1	TRBD1	TRBJ1-1	TRBV4	TRBJ1	CASSHGGQATFF	TGCGCCAGCAGCCATGGCGGGCAGGCGACTTTCTTT	:::::::::0::14:17:18::25:28::36:::
601	TGCGCCAGCAGCCCAGCGGGGGACTCCTACGAGCAGTACTTC	TRBV4-3		TRBJ2-7	TRBV4	TRBJ2	CASSPAGDSYEQYF	TGCGCCAGCAGCCCAGCGGGGGACTCCTACGAGCAGTACTTC	:::::::::0::16:::::20:23:42:::
602	TGCGCCAGCAGCCCAGTGGCGGGGAGCTCCTACGAGCAGTACTTC	TRBV4-3		TRBJ2-7	TRBV4	TRBJ2	CASSPVAGSSYEQYF	TGCGCCAGCAGCCCAGTGGCGGGGAGCTCCTACGAGCAGTACTTC	:::::::::0::16:::::22:26:45:::
603	TGCGCCAGCAGCCCCGCCGGCGGACCCTACGAGCAGTACTTC	TRBV4-3		TRBJ2-7	TRBV4	TRBJ2	CASSPAGGPYEQYF	TGCGCCAGCAGCCCCGCCGGCGGACCCTACGAGCAGTACTTC	:::::::::0::13:::::25::42:::
604	TGCGCCAGCAGCCCCGGACCCAAGACTAACTATGGCTACACCTTC	TRBV4-3		TRBJ1-2	TRBV4	TRBJ1	CASSPGPKTNYGYTF	TGCGCCAGCAGCCCCGGACCCAAGACTAACTATGGCTACACCTTC	:::::::::0::13:::::25:25:45:::
605	TGCGCCAGCAGCCCCGGGACAGGCGCGGGGTATGGCTACACCTTC	TRBV5-1	TRBD1	TRBJ1-2	TRBV5	TRBJ1	CASSPGTGAGYGYTF	TGCGCCAGCAGCCCCGGGACAGGCGCGGGGTATGGCTACACCTTC	:::::::::0::12:12:15::23:30::45:::
606	TGCGCCAGCAGCCCCTCACAGGCCTACGAGCAGTACTTC	TRBV4-3	TRBD1	TRBJ2-7	TRBV4	TRBJ2	CASSPSQAYEQYF	TGCGCCAGCAGCCCCTCACAGGCCTACGAGCAGTACTTC	:::::::::0::13:17:::22:22::39:::
607	TGCGCCAGCAGCCCCTCCCGAACGGGGGCCTACGAGCAGTACTTC	TRBV4-3	TRBD2	TRBJ2-7	TRBV4	TRBJ2	CASSPSRTGAYEQYF	TGCGCCAGCAGCCCCTCCCGAACGGGGGCCTACGAGCAGTACTTC	:::::::::0::13:13:::20:28::45:::
608	TGCGCCAGCAGCCCGACAGGGAACTACGAGCAGTACTTC	TRBV4-1	TRBD1	TRBJ2-7	TRBV4	TRBJ2	CASSPTGNYEQYF	TGCGCCAGCAGCCCGACAGGGAACTACGAGCAGTACTTC	:::::::::0::13:14:::21:23::39:::
609	TGCGCCAGCAGCCCGGCGGACTCCTACGAGCAGTACTTC	TRBV4-3		TRBJ2-7	TRBV4	TRBJ2	CASSPADSYEQYF	TGCGCCAGCAGCCCGGCGGACTCCTACGAGCAGTACTTC	:::::::::0::13:::::17:20:39:::
610	TGCGCCAGCAGCCCGTCTATGGCAGCGAGATATGAGCAGTACTTC	TRBV4-3		TRBJ2-7	TRBV4	TRBJ2	CASSPSMAARYEQYF	TGCGCCAGCAGCCCGTCTATGGCAGCGAGATATGAGCAGTACTTC	:::::::::0::13:::::30::45:::
611	TGCGCCAGCAGCCCGTCTATGGCAGCGAGCTACGAGCAGTACTTC	TRBV4-3		TRBJ2-7	TRBV4	TRBJ2	CASSPSMAASYEQYF	TGCGCCAGCAGCCCGTCTATGGCAGCGAGCTACGAGCAGTACTTC	:::::::::0::13:::::29::45:::
612	TGCGCCAGCAGCCCTAGCGGGGGGACCGCCTACGAGCAGTACTTC	TRBV4-3	TRBD2	TRBJ2-7	TRBV4	TRBJ2	CASSPSGGTAYEQYF	TGCGCCAGCAGCCCTAGCGGGGGGACCGCCTACGAGCAGTACTTC	:::::::::0::13:13:::21:22:26:45:::
613	TGCGCCAGCAGCCCTGCAGGGGGCTATGGCTACACCTTC	TRBV4-3	TRBD1	TRBJ1-2	TRBV4	TRBJ1	CASSPAGGYGYTF	TGCGCCAGCAGCCCTGCAGGGGGCTATGGCTACACCTTC	:::::::::0::13:16:::23:23::39:::
614	TGCGCCAGCAGCCGCGGGGACCCAGCCTACGAGCAGTACTTC	TRBV4-3	TRBD1	TRBJ2-7	TRBV4	TRBJ2	CASSRGDPAYEQYF	TGCGCCAGCAGCCGCGGGGACCCAGCCTACGAGCAGTACTTC	:::::::::0::13:16:16::21:25::42:::
615	TGCGCCAGCAGCCTAGGGACAGGGGATGAGCAGTTCTTC	TRBV5-1	TRBD1	TRBJ2-1	TRBV5	TRBJ2	CASSLGTGDEQFF	TGCGCCAGCAGCCTAGGGACAGGGGATGAGCAGTTCTTC	:::::::::0::12:15:15::25:25::39:::
616	TGCGCCAGCAGCCTCGAAGGGGCAAACATTCAGTACTTC	TRBV4-1	TRBD1	TRBJ2-4	TRBV4	TRBJ2	CASSLEGANIQYF	TGCGCCAGCAGCCTCGAAGGGGCAAACATTCAGTACTTC	:::::::::0::13:17:::22:23::39:::
617	TGCGCCAGCAGCCTCGAAGGGGCGAACATTCATTACTTC	TRBV4-1	TRBD1	TRBJ2-4	TRBV4	TRBJ2	CASSLEGANIHYF	TGCGCCAGCAGCCTCGAAGGGGCGAACATTCATTACTTC	:::::::::0::13:18::23:24:24::39:::
618	TGCGCCAGCAGCGATGGGCGGGTGGGGAGTTATGGCTACACCTTC	TRBV4-3	TRBD2	TRBJ1-2	TRBV4	TRBJ1	CASSDGRVGSYGYTF	TGCGCCAGCAGCGATGGGCGGGTGGGGAGTTATGGCTACACCTTC	:::::::::0::12:17::26:26:30::45:::
619	TGCGCCAGCAGCGGGACAGGGGGTTACGAGCAGTACTTC	TRBV4-1	TRBD1	TRBJ2-7	TRBV4	TRBJ2	CASSGTGGYEQYF	TGCGCCAGCAGCGGGACAGGGGGTTACGAGCAGTACTTC	:::::::::0::12:12:12::23:24::39:::
620	TGCGCCAGCAGCTCGACAGGGGGCGCCTATGGCTACACCTTC	TRBV5-1	TRBD1	TRBJ1-2	TRBV5	TRBJ1	CASSSTGGAYGYTF	TGCGCCAGCAGCTCGACAGGGGGCGCCTATGGCTACACCTTC	:::::::::0::13:14::24:26:26::42:::
621	TGCGCCAGCAGCTTATCCATCGGGGGGCAATATAATGGCTACACCTTC	TRBV7-6	TRBD1	TRBJ1-2	TRBV7	TRBJ1	CASSLSIGGQYNGYTF	TGCGCCAGCAGCTTATCCATCGGGGGGCAATATAATGGCTACACCTTC	:::::::::0::15:22::28:28:34::48:::
622	TGCGCCAGCAGCTTGGACGAAGCCTACGAGCAGTACTTC	TRBV5-1		TRBJ2-7	TRBV5	TRBJ2	CASSLDEAYEQYF	TGCGCCAGCAGCTTGGACGAAGCCTACGAGCAGTACTTC	:::::::::0:17:23:::::22::39:::
623	TGCGCCAGCAGCTTGGAGGGGACAGGGGCGGCTTATGGCTACACCTTC	TRBV5-1	TRBD1	TRBJ1-2	TRBV5	TRBJ1	CASSLEGTGAAYGYTF	TGCGCCAGCAGCTTGGAGGGGACAGGGGCGGCTTATGGCTACACCTTC	:::::::::0:16:16:18:18::28:33::48:::
624	TGCGCCAGCAGCTTGGCCGATGCTTATGAGCAGTATTTC	TRBV5-1		TRBJ2-7	TRBV5	TRBJ2	CASSLADAYEQYF	TGCGCCAGCAGCTTGGCCGATGCTTATGAGCAGTATTTC	:::::::::0:16:18:::::24::39:::
625	TGCGCCAGCAGCTTGGCCGCAGGGGATGCGTATGGCTACACCTTC	TRBV5-1	TRBD1	TRBJ1-2	TRBV5	TRBJ1	CASSLAAGDAYGYTF	TGCGCCAGCAGCTTGGCCGCAGGGGATGCGTATGGCTACACCTTC	:::::::::0:16:18:19:::25:30::45:::
626	TGCGCCAGCAGCTTGGCCGGGGCTTACGAGCAGTACTTC	TRBV5-1	TRBD1	TRBJ2-7	TRBV5	TRBJ2	CASSLAGAYEQYF	TGCGCCAGCAGCTTGGCCGGGGCTTACGAGCAGTACTTC	:::::::::0:16:18:18::23:23:24::39:::
627	TGCGCCAGCAGCTTGGGGGAACTGACAGGGTATACTGAAGCTTTCTTT	TRBV5-1	TRBD1	TRBJ1-1	TRBV5	TRBJ1	CASSLGELTGYTEAFF	TGCGCCAGCAGCTTGGGGGAACTGACAGGGTATACTGAAGCTTTCTTT	:::::::::0:16:16:23:::30:33::48:::
628	TGCGCCAGCAGCTTGGTTGCGGGGGGGACCAATGAGCAGTTCTTC	TRBV5-1	TRBD2	TRBJ2-1	TRBV5	TRBJ2	CASSLVAGGTNEQFF	TGCGCCAGCAGCTTGGTTGCGGGGGGGACCAATGAGCAGTTCTTC	:::::::::0:16:16:18::27:27:29::45:::
629	TGCGCCAGCAGTAATGGAGACCAACTGAACACCGGGGAGCTGTTTTTT	TRBV10-1		TRBJ2-2	TRBV10	TRBJ2	CASSNGDQLNTGELFF	TGCGCCAGCAGTAATGGAGACCAACTGAACACCGGGGAGCTGTTTTTT	:::::::::0::12:::::26::48:::
630	TGCGCCAGCAGTACGAGGGCAATGGCAGATACGCAGTATTTT	TRBV10-2	TRBD2	TRBJ2-3	TRBV10	TRBJ2	CASSTRAMADTQYF	TGCGCCAGCAGTACGAGGGCAATGGCAGATACGCAGTATTTT	:::::::::0::12:14::19:20:25::42:::
631	TGCGCCAGCAGTACGAGGGCAATGGCCGATACGCATTATTTT	TRBV10-2	TRBD2	TRBJ2-3	TRBV10	TRBJ2	CASSTRAMADTHYF	TGCGCCAGCAGTACGAGGGCAATGGCCGATACGCATTATTTT	:::::::::0::12:14::19:20:27::42:::
632	TGCGCCAGCAGTGAAAAGGACTATTGGGGGGACGAGCAGTACTTC	TRBV10-2	TRBD2	TRBJ2-7	TRBV10	TRBJ2	CASSEKDYWGDEQYF	TGCGCCAGCAGTGAAAAGGACTATTGGGGGGACGAGCAGTACTTC	:::::::::0::14:17:::23:31::45:::
633	TGCGCCAGCAGTGAGGAGGAGGTAGCCTACGAGCAGTACTTC	TRBV10-2	TRBD2	TRBJ2-7	TRBV10	TRBJ2	CASSEEEVAYEQYF	TGCGCCAGCAGTGAGGAGGAGGTAGCCTACGAGCAGTACTTC	:::::::::0::15:17:::22:25::42:::
634	TGCGCCAGCAGTGAGGGTCCTAACTATGGCTACACCTTC	TRBV10-1		TRBJ1-2	TRBV10	TRBJ1	CASSEGPNYGYTF	TGCGCCAGCAGTGAGGGTCCTAACTATGGCTACACCTTC	:::::::::0::15:::::19:19:39:::
635	TGCGCCAGCAGTGAGTCGGGTGCGGGGAGCTACGAGCAGTACTTC	TRBV10-2	TRBD2	TRBJ2-7	TRBV10	TRBJ2	CASSESGAGSYEQYF	TGCGCCAGCAGTGAGTCGGGTGCGGGGAGCTACGAGCAGTACTTC	:::::::::0:17:18:21:::26:29::45:::
636	TGCGCCAGCAGTGCTACGGCTGCCTACGAGCAGTACTTC	TRBV10-2		TRBJ2-7	TRBV10	TRBJ2	CASSATAAYEQYF	TGCGCCAGCAGTGCTACGGCTGCCTACGAGCAGTACTTC	:::::::::0::13:::::18:19:39:::
637	TGCGCCAGCAGTGGCGGGAGCGCTTACGAGCAGTACGTC	TRBV10-2		TRBJ2-7	TRBV10	TRBJ2	CASSGGSAYEQYV	TGCGCCAGCAGTGGCGGGAGCGCTTACGAGCAGTACGTC	:::::::::0::13:::::16:20:39:::
638	TGCGCCAGCAGTGGCGGGATCGCATACGAGCAGTACGTC	TRBV10-2	TRBD2	TRBJ2-7	TRBV10	TRBJ2	CASSGGIAYEQYV	TGCGCCAGCAGTGGCGGGATCGCATACGAGCAGTACGTC	:::::::::0::13:13:::19:24::39:::
639	TGCGCCAGCAGTGGCGGGATCGCTTACGAGCAGTACGTC	TRBV10-2	TRBD2	TRBJ2-7	TRBV10	TRBJ2	CASSGGIAYEQYV	TGCGCCAGCAGTGGCGGGATCGCTTACGAGCAGTACGTC	:::::::::0::13:13:::19:24::39:::
640	TGCGCCAGCCGCCAAAGGGGGTCCGGACAGGATGGCTACACCTTC	TRBV4-1	TRBD1	TRBJ1-2	TRBV4	TRBJ1	CASRQRGSGQDGYTF	TGCGCCAGCCGCCAAAGGGGGTCCGGACAGGATGGCTACACCTTC	:::::::::0::15:24:::31:31::45:::
641	TGCGCCAGCTCCCCATGGCGGGGGGCCTACAATGAGCAGTTCTTC	TRBV23-1	TRBD2	TRBJ2-1	TRBV23	TRBJ2	CASSPWRGAYNEQFF	TGCGCCAGCTCCCCATGGCGGGGGGCCTACAATGAGCAGTTCTTC	:::::::::0::9:17::25:25:25::45:::
642	TGCGCCAGTAGCCGAGTACGGAACACTGAAGCTTTCTTT	TRBV13		TRBJ1-1	TRBV13*00	TRBJ1	CASSRVRNTEAFF	TGCGCCAGTAGCCGAGTACGGAACACTGAAGCTTTCTTT	:::::::::0::12:::::20::39:::
643	TGCGCCAGTAGCGGGACAGGGGGTTACGAGCAGTACTTC	TRBV4-1	TRBD1	TRBJ2-7	TRBV4	TRBJ2	CASSGTGGYEQYF	TGCGCCAGTAGCGGGACAGGGGGTTACGAGCAGTACTTC	:::::::::0::12:12:12::23:24::39:::
644	TGCGCCAGTGGGAACTATGGCTACACCTTC	TRBV5-1		TRBJ1-2	TRBV5	TRBJ1	CASGNYGYTF	TGCGCCAGTGGGAACTATGGCTACACCTTC	:::::::::0::8:::::12::30:::
645	TGCGCCGGCAGCCAAGACCGCAGCCTCTCTCCCCAGCATTTT	TRBV4-1		TRBJ1-5	TRBV4	TRBJ1	CAGSQDRSLSPQHF	TGCGCCGGCAGCCAAGACCGCAGCCTCTCTCCCCAGCATTTT	:::::::::0:17:17:::::30::42:::
646	TGCGCTAGCTCACTGGAGCCGGGACCAGAATCGGAAGCTTTCTTT	TRBV12-3	TRBD2	TRBJ1-1	TRBV12	TRBJ1	CASSLEPGPESEAFF	TGCGCTAGCTCACTGGAGCCGGGACCAGAATCGGAAGCTTTCTTT	:::::::::0::9:18:20::28:33::45:::
647	TGCGGTAGCAGCCATGGGTCGGACAGGGGGAAGGACGAGCAGTACTTC	TRBV4-3	TRBD1	TRBJ2-7	TRBV4	TRBJ2	CGSSHGSDRGKDEQYF	TGCGGTAGCAGCCATGGGTCGGACAGGGGGAAGGACGAGCAGTACTTC	:::::::::0::14:20:::30:34::48:::
648	TGCGTCAGCAGCCAAGATCTGGTAACCGCCTATGACCACACCTTC	TRBV4-3		TRBJ1-2	TRBV4	TRBJ1	CVSSQDLVTAYDHTF	TGCGTCAGCAGCCAAGATCTGGTAACCGCCTATGACCACACCTTC	:::::::::0:17:20:::::29::45:::
649	TGCTCCCAGGGGGACAGGGGTCTTAAGACTGAAGCTTTCTTT	TRBV19	TRBD1	TRBJ1-1	TRBV19*00	TRBJ1	CSQGDRGLKTEAFF	TGCTCCCAGGGGGACAGGGGTCTTAAGACTGAAGCTTTCTTT	:::::::::0::9:10:10::20:24::42:::
650	TGGGCCAGCAGCCAAAATGACAGGGCGGATAATGAAAAACTGTTTTTT	TRBV4-2	TRBD1	TRBJ1-4	TRBV4	TRBJ1	WASSQNDRADNEKLFF	TGGGCCAGCAGCCAAAATGACAGGGCGGATAATGAAAAACTGTTTTTT	:::::::::0:17:18:18:::25:29::48:::
651	TGGGCCAGCAGCCAAGAAGCGACTAGCGGGGGCAATGAGCAGTTCTTC	TRBV4-2	TRBD2	TRBJ2-1	TRBV4	TRBJ2	WASSQEATSGGNEQFF	TGGGCCAGCAGCCAAGAAGCGACTAGCGGGGGCAATGAGCAGTTCTTC	:::::::::0:17:17:20:::30:32::48:::
652	TGGGCCAGCATGGAGCAGGCCTCCTACGAGCAGTACTTC	TRBV6-1		TRBJ2-7	TRBV6	TRBJ2	WASMEQASYEQYF	TGGGCCAGCATGGAGCAGGCCTCCTACGAGCAGTACTTC	:::::::::0:16:16:::::20:20:39:::
653	TGGGCCATCAGTGATGGGACTAGTGGTAGCTCCGTCAATGAGCAGTTCTTC	TRBV10-3	TRBD2	TRBJ2-1	TRBV10	TRBJ2	WAISDGTSGSSVNEQFF	TGGGCCATCAGTGATGGGACTAGTGGTAGCTCCGTCAATGAGCAGTTCTTC	:::::::::0::14:15:15::26:27:29:51:::
654	TGTACCAGCAGCAGAGGGACAGGGGCCTACGAGCAGTACTTC	TRBV9	TRBD1	TRBJ2-7	TRBV9*00	TRBJ2	CTSSRGTGAYEQYF	TGTACCAGCAGCAGAGGGACAGGGGCCTACGAGCAGTACTTC	:::::::::0::12:15:15::25:25::42:::
655	TGTACCAGCAGCCCCCGGTACGAGCAGTACTTC	TRBV2	TRBD1	TRBJ2-7	TRBV2*00	TRBJ2	CTSSPRYEQYF	TGTACCAGCAGCCCCCGGTACGAGCAGTACTTC	:::::::::0::11:11:::16:18::33:::
656	TGTACCAGCAGCGACTACAATGAGCAGTTCTTC	TRBV9		TRBJ2-1	TRBV9*00	TRBJ2	CTSSDYNEQFF	TGTACCAGCAGCGACTACAATGAGCAGTTCTTC	:::::::::0:14:18:::::14::33:::
657	TGTACCTCCAGCAGAGATCAAGAGGGACCCAATCAGCCCCAGCATTTT	TRBV15	TRBD2	TRBJ1-5	TRBV15*00	TRBJ1	CTSSRDQEGPNQPQHF	TGTACCTCCAGCAGAGATCAAGAGGGACCCAATCAGCCCCAGCATTTT	:::::::::0:17:19:21::26:29:29::48:::
658	TGTCCCACCAGCAGAGATTGGCTAGCGGGGGGGCAAGAGACCCAGTACTTC	TRBV15	TRBD2	TRBJ2-5	TRBV15*00	TRBJ2	CPTSRDWLAGGQETQYF	TGTCCCACCAGCAGAGATTGGCTAGCGGGGGGGCAAGAGACCCAGTACTTC	:::::::::0:17:18:21::33:33:33::51:::
659	TGTCCCAGCAGCCCCATAAGCGGGGGGTACTACGAGCAGTACTTC	TRBV9	TRBD2	TRBJ2-7	TRBV9*00	TRBJ2	CPSSPISGGYYEQYF	TGTCCCAGCAGCCCCATAAGCGGGGGGTACTACGAGCAGTACTTC	:::::::::0::12:18::27:27:29::45:::
660	TGTCCCAGCAGCCCCGGGGCGGCCTACGAGCAGTACTTC	TRBV7-2	TRBD1	TRBJ2-7	TRBV7	TRBJ2	CPSSPGAAYEQYF	TGTCCCAGCAGCCCCGGGGCGGCCTACGAGCAGTACTTC	:::::::::0::12:12:15::18:22::39:::
661	TGTCCCAGCAGTATCCAGGGGGCGCAGGCGGAGGGCTACACCTTC	TRBV6-1	TRBD1	TRBJ1-2	TRBV6	TRBJ1	CPSSIQGAQAEGYTF	TGTCCCAGCAGTATCCAGGGGGCGCAGGCGGAGGGCTACACCTTC	:::::::::0::12:15::23:25:33::45:::
662	TGTGATAGCAGCTTAACAAGAGGAGGAGGAGGCACCGGGGAGCTGTTTTTT	TRBV7-3	TRBD2	TRBJ2-2	TRBV7	TRBJ2	CDSSLTRGGGGTGELFF	TGTGATAGCAGCTTAACAAGAGGAGGAGGAGGCACCGGGGAGCTGTTTTTT	:::::::::0:17:17:21:::26:32::51:::
663	TGTGCCAACAGCACCGGGGGGGTGTCCTACAATGAGCAGTTCTTC	TRBV9	TRBD1	TRBJ2-1	TRBV9*00	TRBJ2	CANSTGGVSYNEQFF	TGTGCCAACAGCACCGGGGGGGTGTCCTACAATGAGCAGTTCTTC	:::::::::0::12:12:::20:24::45:::
664	TGTGCCAACAGCTTAGGGCCTCAGCACCAGCATTTT	TRBV13		TRBJ1-5	TRBV13*00	TRBJ1	CANSLGPQHQHF	TGTGCCAACAGCTTAGGGCCTCAGCACCAGCATTTT	:::::::::0:18:25:::::20::36:::
665	TGTGCCACAGGCAGGGGGGTCGCTGAAGCTTTCTTT	TRBV15	TRBD1	TRBJ1-1	TRBV15*00	TRBJ1	CATGRGVAEAFF	TGTGCCACAGGCAGGGGGGTCGCTGAAGCTTTCTTT	:::::::::0::14:14:::19:22::36:::
666	TGTGCCACCACCCCGGGACCGGCCTACGAGCAGTACTTC	TRBV15	TRBD1	TRBJ2-7	TRBV15*00	TRBJ2	CATTPGPAYEQYF	TGTGCCACCACCCCGGGACCGGCCTACGAGCAGTACTTC	:::::::::0::10:11:14::22:22::39:::
667	TGTGCCACCACCGCGTCCGGCAACTACGAGCAGTACTTC	TRBV15		TRBJ2-7	TRBV15*00	TRBJ2	CATTASGNYEQYF	TGTGCCACCACCGCGTCCGGCAACTACGAGCAGTACTTC	:::::::::0::10:::::23::39:::
668	TGTGCCACCACGGAGGGGGGGGCCTACGAGCAGTACTTC	TRBV6-5	TRBD1	TRBJ2-7	TRBV6	TRBJ2	CATTEGGAYEQYF	TGTGCCACCACGGAGGGGGGGGCCTACGAGCAGTACTTC	:::::::::0::10:13:::19:22::39:::
669	TGTGCCACCACGGAGGGGGGGGCTTACGAGCAGTACTTC	TRBV6-1	TRBD1	TRBJ2-7	TRBV6	TRBJ2	CATTEGGAYEQYF	TGTGCCACCACGGAGGGGGGGGCTTACGAGCAGTACTTC	:::::::::0::10:13:::19:24::39:::
670	TGTGCCACCAGACGAGCGGCCCTCGGCTACGAGCAGTACTTC	TRBV15	TRBD2	TRBJ2-7	TRBV15*00	TRBJ2	CATRRAALGYEQYF	TGTGCCACCAGACGAGCGGCCCTCGGCTACGAGCAGTACTTC	:::::::::0::11:13::19:24:26::42:::
671	TGTGCCACCAGCACCGCAACAGGGGGATACGAGCAGTACTTC	TRBV15	TRBD1	TRBJ2-7	TRBV15*00	TRBJ2	CATSTATGGYEQYF	TGTGCCACCAGCACCGCAACAGGGGGATACGAGCAGTACTTC	:::::::::0::13:18:::26:27::42:::
672	TGTGCCACCAGCACCGCCGAGAACTATGGCTACACCTTC	TRBV15		TRBJ1-2	TRBV15*00	TRBJ1	CATSTAENYGYTF	TGTGCCACCAGCACCGCCGAGAACTATGGCTACACCTTC	:::::::::0::13:::::21::39:::
673	TGTGCCACCAGCACCGGGACAGGGGGCGCCTACGAGCAGTACTTC	TRBV15	TRBD1	TRBJ2-7	TRBV15*00	TRBJ2	CATSTGTGGAYEQYF	TGTGCCACCAGCACCGGGACAGGGGGCGCCTACGAGCAGTACTTC	:::::::::0::13:13:15::22:22:26:45:::
674	TGTGCCACCAGCACCGGGACCACCTACGAGCAGTACTTC	TRBV15		TRBJ2-7	TRBV15*00	TRBJ2	CATSTGTTYEQYF	TGTGCCACCAGCACCGGGACCACCTACGAGCAGTACTTC	:::::::::0::13:::::16:20:39:::
675	TGTGCCACCAGCACGGGCTTGGCCTACGAGCAGTACGTC	TRBV15		TRBJ2-7	TRBV15*00	TRBJ2	CATSTGLAYEQYV	TGTGCCACCAGCACGGGCTTGGCCTACGAGCAGTACGTC	:::::::::0::13:::::22::39:::
676	TGTGCCACCAGCACGGTTGGACAGGGGGCTCAGCCCCAGCATTTT	TRBV15	TRBD1	TRBJ1-5	TRBV15*00	TRBJ1	CATSTVGQGAQPQHF	TGTGCCACCAGCACGGTTGGACAGGGGGCTCAGCCCCAGCATTTT	:::::::::0::13:18::29:29:29::45:::
677	TGTGCCACCAGCACGGTTGTACAGGGGGCTCAGCCCCAGCATTTT	TRBV15	TRBD1	TRBJ1-5	TRBV15*00	TRBJ1	CATSTVVQGAQPQHF	TGTGCCACCAGCACGGTTGTACAGGGGGCTCAGCCCCAGCATTTT	:::::::::0::13:20::29:29:29::45:::
678	TGTGCCACCAGCAGACAGGCGAATACAGATACGCAGTATTTT	TRBV15		TRBJ2-3	TRBV15*00	TRBJ2	CATSRQANTDTQYF	TGTGCCACCAGCAGACAGGCGAATACAGATACGCAGTATTTT	:::::::::0::15:::::24::42:::
679	TGTGCCACCAGCAGAGATAAAGCGTATGAGCAGTTCTTC	TRBV15		TRBJ2-1	TRBV15*00	TRBJ2	CATSRDKAYEQFF	TGTGCCACCAGCAGAGATAAAGCGTATGAGCAGTTCTTC	:::::::::0:17:18:::::25::39:::
680	TGTGCCACCAGCAGAGATACCGGCGGGAACTATGGCTACACCTTC	TRBV15	TRBD2	TRBJ1-2	TRBV15*00	TRBJ1	CATSRDTGGNYGYTF	TGTGCCACCAGCAGAGATACCGGCGGGAACTATGGCTACACCTTC	:::::::::0:17:18:22:::27:27::45:::
681	TGTGCCACCAGCAGAGATCGACCAGGCCAGCCCCAGCATTTT	TRBV15		TRBJ1-5	TRBV15*00	TRBJ1	CATSRDRPGQPQHF	TGTGCCACCAGCAGAGATCGACCAGGCCAGCCCCAGCATTTT	:::::::::0:17:19:::::27::42:::
682	TGTGCCACCAGCAGAGATCTCCCGACAGGACGACAAGAGACCCAGTACTTC	TRBV15	TRBD1	TRBJ2-5	TRBV15*00	TRBJ2	CATSRDLPTGRQETQYF	TGTGCCACCAGCAGAGATCTCCCGACAGGACGACAAGAGACCCAGTACTTC	:::::::::0:17:21:23:::29:33::51:::
683	TGTGCCACCAGCAGAGATTGGCGAGCGGGGGGGCAAGAGACCCAGTACTTC	TRBV15	TRBD2	TRBJ2-5	TRBV15*00	TRBJ2	CATSRDWRAGGQETQYF	TGTGCCACCAGCAGAGATTGGCGAGCGGGGGGGCAAGAGACCCAGTACTTC	:::::::::0:17:18:23::33:33:33::51:::
684	TGTGCCACCAGCAGAGATTGGCTAGCGGGGGGGCAAGAGACCCAGTACTTC	TRBV15	TRBD2	TRBJ2-5	TRBV15*00	TRBJ2	CATSRDWLAGGQETQYF	TGTGCCACCAGCAGAGATTGGCTAGCGGGGGGGCAAGAGACCCAGTACTTC	:::::::::0:17:18:21::33:33:33::51:::
685	TGTGCCACCAGCAGAGATTGGCTAGTGGGGGGGCAAGAGACCCAGTACTTC	TRBV15	TRBD2	TRBJ2-5	TRBV15*00	TRBJ2	CATSRDWLVGGQETQYF	TGTGCCACCAGCAGAGATTGGCTAGTGGGGGGGCAAGAGACCCAGTACTTC	:::::::::0:17:18:21::33:33:33::51:::
686	TGTGCCACCAGCAGAGCCCCACTAGCGGGGGGTAATGAGCAGTTCTTC	TRBV15	TRBD2	TRBJ2-1	TRBV15*00	TRBJ2	CATSRAPLAGGNEQFF	TGTGCCACCAGCAGAGCCCCACTAGCGGGGGGTAATGAGCAGTTCTTC	:::::::::0::16:20::32:32:33::48:::
687	TGTGCCACCAGCAGAGCCCCAGCTTACGAGCAGTACTTC	TRBV15		TRBJ2-7	TRBV15*00	TRBJ2	CATSRAPAYEQYF	TGTGCCACCAGCAGAGCCCCAGCTTACGAGCAGTACTTC	:::::::::0::16:::::24::39:::
688	TGTGCCACCAGCAGAGCCCCCCTAGCGGGGGGCAATGAGCAGTTCTTC	TRBV15	TRBD2	TRBJ2-1	TRBV15*00	TRBJ2	CATSRAPLAGGNEQFF	TGTGCCACCAGCAGAGCCCCCCTAGCGGGGGGCAATGAGCAGTTCTTC	:::::::::0::16:21::32:32:32::48:::
689	TGTGCCACCAGCAGAGCCGGGGCCTACGAGCAGTACTTC	TRBV15	TRBD1	TRBJ2-7	TRBV15*00	TRBJ2	CATSRAGAYEQYF	TGTGCCACCAGCAGAGCCGGGGCCTACGAGCAGTACTTC	:::::::::0::16:16:18::21:22::39:::
690	TGTGCCACCAGCAGAGCGACAGGGGCTCAGCCCCAGCATTTT	TRBV15	TRBD1	TRBJ1-5	TRBV15*00	TRBJ1	CATSRATGAQPQHF	TGTGCCACCAGCAGAGCGACAGGGGCTCAGCCCCAGCATTTT	:::::::::0::16:17:::25:26::42:::
691	TGTGCCACCAGCAGAGCGACGGGCGCTGAAGCTTTCTTT	TRBV15	TRBD1	TRBJ1-1	TRBV15*00	TRBJ1	CATSRATGAEAFF	TGTGCCACCAGCAGAGCGACGGGCGCTGAAGCTTTCTTT	:::::::::0::16:20::24:25:25::39:::
692	TGTGCCACCAGCAGAGCGGCAGGTTCCTACGAGCAGTACTTC	TRBV15		TRBJ2-7	TRBV15*00	TRBJ2	CATSRAAGSYEQYF	TGTGCCACCAGCAGAGCGGCAGGTTCCTACGAGCAGTACTTC	:::::::::0::16:::::24::42:::
693	TGTGCCACCAGCAGAGCGGGGCTCGGCTCCTACGAGCAGTACTTC	TRBV15	TRBD1	TRBJ2-7	TRBV15*00	TRBJ2	CATSRAGLGSYEQYF	TGTGCCACCAGCAGAGCGGGGCTCGGCTCCTACGAGCAGTACTTC	:::::::::0::16:17::22:22:25:26:45:::
694	TGTGCCACCAGCAGAGCTATGAACACTGAAGCTTTCTTT	TRBV15		TRBJ1-1	TRBV15*00	TRBJ1	CATSRAMNTEAFF	TGTGCCACCAGCAGAGCTATGAACACTGAAGCTTTCTTT	:::::::::0::16:::::18:19:39:::
695	TGTGCCACCAGCAGAGCTATGTTCACTGAAGCTTTCTTT	TRBV15		TRBJ1-1	TRBV15*00	TRBJ1	CATSRAMFTEAFF	TGTGCCACCAGCAGAGCTATGTTCACTGAAGCTTTCTTT	:::::::::0::16:::::23::39:::
696	TGTGCCACCAGCAGAGGACAGGCCTACGAGCAGTACGTC	TRBV15	TRBD1	TRBJ2-7	TRBV15*00	TRBJ2	CATSRGQAYEQYV	TGTGCCACCAGCAGAGGACAGGCCTACGAGCAGTACGTC	:::::::::0::16:16:::22:22::39:::
697	TGTGCCACCAGCAGAGGACAGGGGTACGAGCAGTACTTC	TRBV15	TRBD1	TRBJ2-7	TRBV15*00	TRBJ2	CATSRGQGYEQYF	TGTGCCACCAGCAGAGGACAGGGGTACGAGCAGTACTTC	:::::::::0::16:16:::24:24::39:::
698	TGTGCCACCAGCAGAGGACCAGCCTACGAGCAGTACGTC	TRBV15		TRBJ2-7	TRBV15*00	TRBJ2	CATSRGPAYEQYV	TGTGCCACCAGCAGAGGACCAGCCTACGAGCAGTACGTC	:::::::::0::16:::::22::39:::
699	TGTGCCACCAGCAGAGGACTAGCTTACGAGCAGTACGTC	TRBV15	TRBD2	TRBJ2-7	TRBV15*00	TRBJ2	CATSRGLAYEQYV	TGTGCCACCAGCAGAGGACTAGCTTACGAGCAGTACGTC	:::::::::0::16:16:::23:24::39:::
700	TGTGCCACCAGCAGAGGAGGAGGGTACGAGCAGTACTTC	TRBV15	TRBD2	TRBJ2-7	TRBV15*00	TRBJ2	CATSRGGGYEQYF	TGTGCCACCAGCAGAGGAGGAGGGTACGAGCAGTACTTC	:::::::::0::16:18::24:24:24::39:::
701	TGTGCCACCAGCAGAGGCGAATCCTACGAGCAGTACTTC	TRBV15		TRBJ2-7	TRBV15*00	TRBJ2	CATSRGESYEQYF	TGTGCCACCAGCAGAGGCGAATCCTACGAGCAGTACTTC	:::::::::0::16:::::21::39:::
702	TGTGCCACCAGCAGAGGGACAGCCTACGAGCAGTACTTC	TRBV15	TRBD1	TRBJ2-7	TRBV15*00	TRBJ2	CATSRGTAYEQYF	TGTGCCACCAGCAGAGGGACAGCCTACGAGCAGTACTTC	:::::::::0::16:16:::22:22::39:::
703	TGTGCCACCAGCAGAGGGATTTCCTACGAGCAGTACGTC	TRBV15		TRBJ2-7	TRBV15*00	TRBJ2	CATSRGISYEQYV	TGTGCCACCAGCAGAGGGATTTCCTACGAGCAGTACGTC	:::::::::0::16:::::21::39:::
704	TGTGCCACCAGCAGAGGGGAATCCTACGAGCAGTACTTC	TRBV15		TRBJ2-7	TRBV15*00	TRBJ2	CATSRGESYEQYF	TGTGCCACCAGCAGAGGGGAATCCTACGAGCAGTACTTC	:::::::::0::16:::::21::39:::
705	TGTGCCACCAGCAGAGGGGACGGATATGAGCAGTTCTTC	TRBV15	TRBD1	TRBJ2-1	TRBV15*00	TRBJ2	CATSRGDGYEQFF	TGTGCCACCAGCAGAGGGGACGGATATGAGCAGTTCTTC	:::::::::0::16:16:16::21:25::39:::
706	TGTGCCACCAGCAGAGGGGGGGCCTACGAGCAGTACTTC	TRBV15	TRBD1	TRBJ2-7	TRBV15*00	TRBJ2	CATSRGGAYEQYF	TGTGCCACCAGCAGAGGGGGGGCCTACGAGCAGTACTTC	:::::::::0::16:16:::21:22::39:::
707	TGTGCCACCAGCAGAGGGGGGGGCTACGAGCAGTACTTC	TRBV15	TRBD1	TRBJ2-7	TRBV15*00	TRBJ2	CATSRGGGYEQYF	TGTGCCACCAGCAGAGGGGGGGGCTACGAGCAGTACTTC	:::::::::0::16:16:::21:23::39:::
708	TGTGCCACCAGCAGAGGGTCCGGGACAGGGGCCTACGAGCAGTACTTC	TRBV15	TRBD1	TRBJ2-7	TRBV15*00	TRBJ2	CATSRGSGTGAYEQYF	TGTGCCACCAGCAGAGGGTCCGGGACAGGGGCCTACGAGCAGTACTTC	:::::::::0::16:19:21::31:31::48:::
709	TGTGCCACCAGCAGAGTCAGCGGGGGGGCACGGGAGCAGTTCTTC	TRBV15	TRBD2	TRBJ2-1	TRBV15*00	TRBJ2	CATSRVSGGAREQFF	TGTGCCACCAGCAGAGTCAGCGGGGGGGCACGGGAGCAGTTCTTC	:::::::::0::16:18::28:29:33::45:::
710	TGTGCCACCAGCAGAGTCAGCGGGGGGGCGCGGGAGCAGTTCTTC	TRBV15	TRBD2	TRBJ2-1	TRBV15*00	TRBJ2	CATSRVSGGAREQFF	TGTGCCACCAGCAGAGTCAGCGGGGGGGCGCGGGAGCAGTTCTTC	:::::::::0::16:18::28:29:33::45:::
711	TGTGCCACCAGCAGATCCCCAGGGCTCGAGCAGTACGTC	TRBV15	TRBD1	TRBJ2-7	TRBV15*00	TRBJ2	CATSRSPGLEQYV	TGTGCCACCAGCAGATCCCCAGGGCTCGAGCAGTACGTC	:::::::::0::15:19:::24:26::39:::
712	TGTGCCACCAGCAGCGCCCCTGGGGGTTACGAGCAGTACTTC	TRBV15	TRBD1	TRBJ2-7	TRBV15*00	TRBJ2	CATSSAPGGYEQYF	TGTGCCACCAGCAGCGCCCCTGGGGGTTACGAGCAGTACTTC	:::::::::0::14:16:::22:27::42:::
713	TGTGCCACCAGCAGCGGGACAGGTCCCTACGAGCAGTACTTC	TRBV15	TRBD1	TRBJ2-7	TRBV15*00	TRBJ2	CATSSGTGPYEQYF	TGTGCCACCAGCAGCGGGACAGGTCCCTACGAGCAGTACTTC	:::::::::0::14:14:15::23:25::42:::
714	TGTGCCACCAGCAGCGGGACAGTTCCCTACGAGCAGTATTTC	TRBV15	TRBD1	TRBJ2-7	TRBV15*00	TRBJ2	CATSSGTVPYEQYF	TGTGCCACCAGCAGCGGGACAGTTCCCTACGAGCAGTATTTC	:::::::::0::14:14:15::22:25::42:::
715	TGTGCCACCAGCAGCGGGACCGCATACGAGCAGTACGTC	TRBV15	TRBD1	TRBJ2-7	TRBV15*00	TRBJ2	CATSSGTAYEQYV	TGTGCCACCAGCAGCGGGACCGCATACGAGCAGTACGTC	:::::::::0::14:14:15::20:24::39:::
716	TGTGCCACCAGCAGCGGGCAGGGCTACGAGCAGTACTTC	TRBV15	TRBD1	TRBJ2-7	TRBV15*00	TRBJ2	CATSSGQGYEQYF	TGTGCCACCAGCAGCGGGCAGGGCTACGAGCAGTACTTC	:::::::::0::14:14:15::23:23::39:::
717	TGTGCCACCAGCAGGACAGGAGGGCATGAGCAGTTCTTC	TRBV15	TRBD1	TRBJ2-1	TRBV15*00	TRBJ2	CATSRTGGHEQFF	TGTGCCACCAGCAGGACAGGAGGGCATGAGCAGTTCTTC	:::::::::0::14:14::25:25:25::39:::
718	TGTGCCACCAGCAGGGCTTCCGGCTACGAGCAGTACTTC	TRBV15		TRBJ2-7	TRBV15*00	TRBJ2	CATSRASGYEQYF	TGTGCCACCAGCAGGGCTTCCGGCTACGAGCAGTACTTC	:::::::::0::14:::::23::39:::
719	TGTGCCACCAGCAGGTCAGGGGGCACTGAAGCTTTCTTT	TRBV15	TRBD1	TRBJ1-1	TRBV15*00	TRBJ1	CATSRSGGTEAFF	TGTGCCACCAGCAGGTCAGGGGGCACTGAAGCTTTCTTT	:::::::::0::14:16:::23:23::39:::
720	TGTGCCACCAGCAGTAATAAGGGGGCTGAAGCTTTCTTT	TRBV15	TRBD1	TRBJ1-1	TRBV15*00	TRBJ1	CATSSNKGAEAFF	TGTGCCACCAGCAGTAATAAGGGGGCTGAAGCTTTCTTT	:::::::::0::14:19:::25:25::39:::
721	TGTGCCACCAGCAGTACAGGGGTTGGGGCCAACGTCCTGACTTTC	TRBV15	TRBD1	TRBJ2-6	TRBV15*00	TRBJ2	CATSSTGVGANVLTF	TGTGCCACCAGCAGTACAGGGGTTGGGGCCAACGTCCTGACTTTC	:::::::::0::14:15:::22:23::45:::
722	TGTGCCACCAGCAGTAGTCTTTCCTACGAGCAGTACCTC	TRBV15		TRBJ2-7	TRBV15*00	TRBJ2	CATSSSLSYEQYL	TGTGCCACCAGCAGTAGTCTTTCCTACGAGCAGTACCTC	:::::::::0:17:20:::::21::39:::
723	TGTGCCACCAGCAGTGGGACAGCCTACGAGCAGTACTTC	TRBV15	TRBD1	TRBJ2-7	TRBV15*00	TRBJ2	CATSSGTAYEQYF	TGTGCCACCAGCAGTGGGACAGCCTACGAGCAGTACTTC	:::::::::0::14:15:15::22:22::39:::
724	TGTGCCACCAGCATGGCGAGCAATCAGCCCCAGCATTTT	TRBV15		TRBJ1-5	TRBV15*00	TRBJ1	CATSMASNQPQHF	TGTGCCACCAGCATGGCGAGCAATCAGCCCCAGCATTTT	:::::::::0::13:::::18::39:::
725	TGTGCCACCAGCCAGGGGGGGGCCTACGAGCAGTACTTC	TRBV15	TRBD1	TRBJ2-7	TRBV15*00	TRBJ2	CATSQGGAYEQYF	TGTGCCACCAGCCAGGGGGGGGCCTACGAGCAGTACTTC	:::::::::0::12:12:::19:22::39:::
726	TGTGCCACCAGCCCCGACAGGGGGCCTTACGAGCAGTACTTC	TRBV15	TRBD1	TRBJ2-7	TRBV15*00	TRBJ2	CATSPDRGPYEQYF	TGTGCCACCAGCCCCGACAGGGGGCCTTACGAGCAGTACTTC	:::::::::0::12:15::25:25:27::42:::
727	TGTGCCACCAGCCCCGGACCGGCCTACGAGCAGTACTTC	TRBV7-3	TRBD1	TRBJ2-7	TRBV7	TRBJ2	CATSPGPAYEQYF	TGTGCCACCAGCCCCGGACCGGCCTACGAGCAGTACTTC	:::::::::0::12:12:15::17:22::39:::
728	TGTGCCACCAGCCCCTCAGCAGGGGGCTATGGCTACACCTTC	TRBV15	TRBD1	TRBJ1-2	TRBV15*00	TRBJ1	CATSPSAGGYGYTF	TGTGCCACCAGCCCCTCAGCAGGGGGCTATGGCTACACCTTC	:::::::::0::12:19:::26:26::42:::
729	TGTGCCACCAGCCCGGGCGTGGGGAATGAGCAGTTCTTC	TRBV15	TRBD1	TRBJ2-1	TRBV15*00	TRBJ2	CATSPGVGNEQFF	TGTGCCACCAGCCCGGGCGTGGGGAATGAGCAGTTCTTC	:::::::::0::12:12:14::17:24::39:::
730	TGTGCCACCAGCCGAGCGGCCCTCGGCTACGAGCAGTACTTC	TRBV15	TRBD2	TRBJ2-7	TRBV15*00	TRBJ2	CATSRAALGYEQYF	TGTGCCACCAGCCGAGCGGCCCTCGGCTACGAGCAGTACTTC	:::::::::0::16:17::19:24:26::42:::
731	TGTGCCACCAGCCGGTCCGGCTGCTACGAGCAGTACTTC	TRBV15		TRBJ2-7	TRBV15*00	TRBJ2	CATSRSGCYEQYF	TGTGCCACCAGCCGGTCCGGCTGCTACGAGCAGTACTTC	:::::::::0::12:::::19:20:39:::
732	TGTGCCACCAGCCGTGACAGCCTCTACGAGCAGTACTTC	TRBV12-3	TRBD1	TRBJ2-7	TRBV12	TRBJ2	CATSRDSLYEQYF	TGTGCCACCAGCCGTGACAGCCTCTACGAGCAGTACTTC	:::::::::0::11:11:13::20:23::39:::
733	TGTGCCACCAGCGAAGGAAATGCTCAGCCCCAGCATTTT	TRBV15		TRBJ1-5	TRBV15*00	TRBJ1	CATSEGNAQPQHF	TGTGCCACCAGCGAAGGAAATGCTCAGCCCCAGCATTTT	:::::::::0::12:::::23::39:::
734	TGTGCCACCAGCGAGGCGGTTTCCTACGAGCAGTACTTC	TRBV15		TRBJ2-7	TRBV15*00	TRBJ2	CATSEAVSYEQYF	TGTGCCACCAGCGAGGCGGTTTCCTACGAGCAGTACTTC	:::::::::0::15:::::21::39:::
735	TGTGCCACCAGCGGAGATTGGCTAGCGGGGGGGCAAGAGACCCAGTACTTC	TRBV15	TRBD2	TRBJ2-5	TRBV15*00	TRBJ2	CATSGDWLAGGQETQYF	TGTGCCACCAGCGGAGATTGGCTAGCGGGGGGGCAAGAGACCCAGTACTTC	:::::::::0:17:18:21::33:33:33::51:::
736	TGTGCCACCAGCGGAGGGGTGGGTTACGAGCAGTACGTC	TRBV15		TRBJ2-7	TRBV15*00	TRBJ2	CATSGGVGYEQYV	TGTGCCACCAGCGGAGGGGTGGGTTACGAGCAGTACGTC	:::::::::0::16:::::24::39:::
737	TGTGCCACCAGCGGATCTACAGGTCAGCCCCAGCATTTT	TRBV15	TRBD1	TRBJ1-5	TRBV15*00	TRBJ1	CATSGSTGQPQHF	TGTGCCACCAGCGGATCTACAGGTCAGCCCCAGCATTTT	:::::::::0:15:18:18:::23:23::39:::
738	TGTGCCACCAGCGGGGCCACTGGGGGATATGAGCAGTTCTTC	TRBV15	TRBD1	TRBJ2-1	TRBV15*00	TRBJ2	CATSGATGGYEQFF	TGTGCCACCAGCGGGGCCACTGGGGGATATGAGCAGTTCTTC	:::::::::0::12:18:::26:28::42:::
739	TGTGCCACCAGCGGGGCGCCGGGAAACTATGGCTACACCTTC	TRBV15	TRBD1	TRBJ1-2	TRBV15*00	TRBJ1	CATSGAPGNYGYTF	TGTGCCACCAGCGGGGCGCCGGGAAACTATGGCTACACCTTC	:::::::::0::12:12::17:20:24::42:::
740	TGTGCCACCAGCGGGGGACAGGGCTTCTACAATGAGCAGTTCTTC	TRBV15	TRBD1	TRBJ2-1	TRBV15*00	TRBJ2	CATSGGQGFYNEQFF	TGTGCCACCAGCGGGGGACAGGGCTTCTACAATGAGCAGTTCTTC	:::::::::0::12:14:14::19:19:23:45:::
741	TGTGCCACCAGCGGGGGGCCCGGGACAGGGGCCTACGAGCAGTACTTC	TRBV15	TRBD1	TRBJ2-7	TRBV15*00	TRBJ2	CATSGGPGTGAYEQYF	TGTGCCACCAGCGGGGGGCCCGGGACAGGGGCCTACGAGCAGTACTTC	:::::::::0::12:18:21::31:31::48:::
742	TGTGCCACCAGCGGGTCAGGCCACTACGAGCAGTACTTC	TRBV15	TRBD1	TRBJ2-7	TRBV15*00	TRBJ2	CATSGSGHYEQYF	TGTGCCACCAGCGGGTCAGGCCACTACGAGCAGTACTTC	:::::::::0::12:12:12::20:23::39:::
743	TGTGCCACCAGCGGTGGGGTCTCCTACGAGCAGTACGTC	TRBV15		TRBJ2-7	TRBV15*00	TRBJ2	CATSGGVSYEQYV	TGTGCCACCAGCGGTGGGGTCTCCTACGAGCAGTACGTC	:::::::::0::12:::::20:20:39:::
744	TGTGCCACCAGCTCCGGACAGGCGTACGAGCAGTACTTC	TRBV15	TRBD1	TRBJ2-7	TRBV15*00	TRBJ2	CATSSGQAYEQYF	TGTGCCACCAGCTCCGGACAGGCGTACGAGCAGTACTTC	:::::::::0::12:15:::22:24::39:::
745	TGTGCCACCAGCTCGTCGGCGACAGGAGCCTACGAGCAGTACGTC	TRBV15		TRBJ2-7	TRBV15*00	TRBJ2	CATSSSATGAYEQYV	TGTGCCACCAGCTCGTCGGCGACAGGAGCCTACGAGCAGTACGTC	:::::::::0::12:::::23:28:45:::
746	TGTGCCACCAGCTCGTCGGCGACAGGAGCCTACGAGCAGTACTTC	TRBV15		TRBJ2-7	TRBV15*00	TRBJ2	CATSSSATGAYEQYF	TGTGCCACCAGCTCGTCGGCGACAGGAGCCTACGAGCAGTACTTC	:::::::::0::12:::::23:28:45:::
747	TGTGCCACCAGCTCTGGGCCGGAGATTTACGAGCAGTACTTC	TRBV15	TRBD2	TRBJ2-7	TRBV15*00	TRBJ2	CATSSGPEIYEQYF	TGTGCCACCAGCTCTGGGCCGGAGATTTACGAGCAGTACTTC	:::::::::0::12:15::18:20:27::42:::
748	TGTGCCACCAGGACCGCCGAGAACTATGGCTACACCTTC	TRBV15		TRBJ1-2	TRBV15*00	TRBJ1	CATRTAENYGYTF	TGTGCCACCAGGACCGCCGAGAACTATGGCTACACCTTC	:::::::::0::11:::::21::39:::
749	TGTGCCACCAGTCGGGGAGCAGATACGCAGTATTTT	TRBV24-1	TRBD2	TRBJ2-3	TRBV24	TRBJ2	CATSRGADTQYF	TGTGCCACCAGTCGGGGAGCAGATACGCAGTATTTT	:::::::::0::12:14:::19:19::36:::
750	TGTGCCACCAGTGACGGAGGGGGTCCCGAAGCTTTCTTT	TRBV24-1	TRBD1	TRBJ1-1	TRBV24	TRBJ1	CATSDGGGPEAFF	TGTGCCACCAGTGACGGAGGGGGTCCCGAAGCTTTCTTT	:::::::::0::14:17:::23:27::39:::
751	TGTGCCACCAGTGATCCCGGGACAGTCTATGGCTACACCTTC	TRBV24-1	TRBD1	TRBJ1-2	TRBV24	TRBJ1	CATSDPGTVYGYTF	TGTGCCACCAGTGATCCCGGGACAGTCTATGGCTACACCTTC	:::::::::0::15:15:18::25:26::42:::
752	TGTGCCACCAGTGATCCCGGGACAGTTTATGGCTACACCTTC	TRBV24-1	TRBD1	TRBJ1-2	TRBV24	TRBJ1	CATSDPGTVYGYTF	TGTGCCACCAGTGATCCCGGGACAGTTTATGGCTACACCTTC	:::::::::0::15:15:18::25:27::42:::
753	TGTGCCACCAGTGATTTTCCCAGAGACTATGGCTACACCTTC	TRBV24-1		TRBJ1-2	TRBV24	TRBJ1	CATSDFPRDYGYTF	TGTGCCACCAGTGATTTTCCCAGAGACTATGGCTACACCTTC	:::::::::0::17:::::25::42:::
754	TGTGCCACCAGTGCAGGGCCGCTATCCTACGAGCAGTACTTC	TRBV24-1	TRBD2	TRBJ2-7	TRBV24	TRBJ2	CATSAGPLSYEQYF	TGTGCCACCAGTGCAGGGCCGCTATCCTACGAGCAGTACTTC	:::::::::0::13:18:::24:24::42:::
755	TGTGCCACCAGTGCAGGGCTGCTATCCTACGAGCAGTACTTC	TRBV24-1	TRBD1	TRBJ2-7	TRBV24	TRBJ2	CATSAGLLSYEQYF	TGTGCCACCAGTGCAGGGCTGCTATCCTACGAGCAGTACTTC	:::::::::0::13:13:::18:24::42:::
756	TGTGCCACCAGTGTCCGGACAGCCTACACCTTC	TRBV24-1	TRBD1	TRBJ1-2	TRBV24	TRBJ1	CATSVRTAYTF	TGTGCCACCAGTGTCCGGACAGCCTACACCTTC	:::::::::0::13:16:::22:23::33:::
757	TGTGCCACCAGTGTTAGGGGAGGGGATGAGCAGTTCTTC	TRBV24-1	TRBD2	TRBJ2-1	TRBV24	TRBJ2	CATSVRGGDEQFF	TGTGCCACCAGTGTTAGGGGAGGGGATGAGCAGTTCTTC	:::::::::0::13:14::24:24:25::39:::
758	TGTGCCACCAGTGTTGGGCGACAGGGGACGATCCAGCCCCAGCATTTT	TRBV24-1	TRBD1	TRBJ1-5	TRBV24	TRBJ1	CATSVGRQGTIQPQHF	TGTGCCACCAGTGTTGGGCGACAGGGGACGATCCAGCCCCAGCATTTT	:::::::::0::13:19::29:30:33::48:::
759	TGTGCCACCCGCTCCGGACAGGCCTACGAGCAGTACTTC	TRBV15	TRBD1	TRBJ2-7	TRBV15*00	TRBJ2	CATRSGQAYEQYF	TGTGCCACCCGCTCCGGACAGGCCTACGAGCAGTACTTC	:::::::::0::12:15:::22:22::39:::
760	TGTGCCACCCTAGCGGGGGGCAGCTACGAGCAGTACTTC	TRBV28	TRBD2	TRBJ2-7	TRBV28*00	TRBJ2	CATLAGGSYEQYF	TGTGCCACCCTAGCGGGGGGCAGCTACGAGCAGTACTTC	:::::::::0::7:9::20:21:23::39:::
761	TGTGCCACCCTAGCGTGGGGCAGCTACGAGCAGTACTTC	TRBV28	TRBD2	TRBJ2-7	TRBV28*00	TRBJ2	CATLAWGSYEQYF	TGTGCCACCCTAGCGTGGGGCAGCTACGAGCAGTACTTC	:::::::::0::7:9::20:21:23::39:::
762	TGTGCCACCGCCCCGCGACAGGGTGTTTTGCATGAGCAGTTCTTC	TRBV24-1	TRBD1	TRBJ2-1	TRBV24	TRBJ2	CATAPRQGVLHEQFF	TGTGCCACCGCCCCGCGACAGGGTGTTTTGCATGAGCAGTTCTTC	:::::::::0::9:11:14::23:31::45:::
763	TGTGCCACCGCCCCGGGACAGGGTGTTTTTCATGAGCAGTTCTTC	TRBV24-1	TRBD1	TRBJ2-1	TRBV24	TRBJ2	CATAPGQGVFHEQFF	TGTGCCACCGCCCCGGGACAGGGTGTTTTTCATGAGCAGTTCTTC	:::::::::0::9:11:14::23:31::45:::
764	TGTGCCACCGCGACTAGCGGGGGCTACGAGCAGTACTTC	TRBV15	TRBD2	TRBJ2-7	TRBV15*00	TRBJ2	CATATSGGYEQYF	TGTGCCACCGCGACTAGCGGGGGCTACGAGCAGTACTTC	:::::::::0::9:11:::21:23::39:::
765	TGTGCCACCGGGGCGTCGGGGGGTTACGAGCAGTACTTC	TRBV15	TRBD1	TRBJ2-7	TRBV15*00	TRBJ2	CATGASGGYEQYF	TGTGCCACCGGGGCGTCGGGGGGTTACGAGCAGTACTTC	:::::::::0::9:9::14:15:24::39:::
766	TGTGCCACCTCTGGCTCTGGGGCCAACGTCCTGACTTTC	TRBV6-2		TRBJ2-6	TRBV6	TRBJ2	CATSGSGANVLTF	TGTGCCACCTCTGGCTCTGGGGCCAACGTCCTGACTTTC	:::::::::0::7:::::13:14:39:::
767	TGTGCCACCTCTGGGGCCGCGTCCTACGAGCAGTACTTC	TRBV15	TRBD1	TRBJ2-7	TRBV15*00	TRBJ2	CATSGAASYEQYF	TGTGCCACCTCTGGGGCCGCGTCCTACGAGCAGTACTTC	:::::::::0::9:12::18:20:21::39:::
768	TGTGCCACGAATGCAGGGGCCGCGAACGAGCAGTACTTC	TRBV6-1	TRBD1	TRBJ2-7	TRBV6	TRBJ2	CATNAGAANEQYF	TGTGCCACGAATGCAGGGGCCGCGAACGAGCAGTACTTC	:::::::::0::7:13::21:23:25::39:::
769	TGTGCCACGAGCCGGTCCGGCAACTACGAGCAGTACTTC	TRBV15		TRBJ2-7	TRBV15*00	TRBJ2	CATSRSGNYEQYF	TGTGCCACGAGCCGGTCCGGCAACTACGAGCAGTACTTC	:::::::::0::12:::::23::39:::
770	TGTGCCACGAGCGCCTCTACAGCCGATGAGCAGTTCTTC	TRBV15		TRBJ2-1	TRBV15*00	TRBJ2	CATSASTADEQFF	TGTGCCACGAGCGCCTCTACAGCCGATGAGCAGTTCTTC	:::::::::0::12:::::25::39:::
771	TGTGCCACGGGACAGGGGGCTTACGAGCAGTACTTC	TRBV6-2	TRBD1	TRBJ2-7	TRBV6	TRBJ2	CATGQGAYEQYF	TGTGCCACGGGACAGGGGGCTTACGAGCAGTACTTC	:::::::::0::7:7:8:20:20:21::36:::
772	TGTGCCACTAATCGAGCGGGGGTATACGAGCAGTACTTC	TRBV9	TRBD2	TRBJ2-7	TRBV9*00	TRBJ2	CATNRAGVYEQYF	TGTGCCACTAATCGAGCGGGGGTATACGAGCAGTACTTC	:::::::::0::7:14:::20:24::39:::
773	TGTGCCACTTCTGGGGCCGCGTCCTACGAGCAGTACTTC	TRBV15	TRBD1	TRBJ2-7	TRBV15*00	TRBJ2	CATSGAASYEQYF	TGTGCCACTTCTGGGGCCGCGTCCTACGAGCAGTACTTC	:::::::::0::8:12::18:20:21::39:::
774	TGTGCCACTTGCAGAGCCGGGGCCTACGAGCAGTACTTC	TRBV15	TRBD1	TRBJ2-7	TRBV15*00	TRBJ2	CATCRAGAYEQYF	TGTGCCACTTGCAGAGCCGGGGCCTACGAGCAGTACTTC	:::::::::0::16:16:18::21:22::39:::
775	TGTGCCAGAAGCTCAGGGGGCACCAACTACAATGAGCAGTTCTTC	TRBV5-3	TRBD1	TRBJ2-1	TRBV5	TRBJ2	CARSSGGTNYNEQFF	TGTGCCAGAAGCTCAGGGGGCACCAACTACAATGAGCAGTTCTTC	:::::::::0::13:13::21:24:26::45:::
776	TGTGCCAGAAGCTGGGGGCCCTCCTACGAGCAGTACTTC	TRBV7-6	TRBD1	TRBJ2-7	TRBV7	TRBJ2	CARSWGPSYEQYF	TGTGCCAGAAGCTGGGGGCCCTCCTACGAGCAGTACTTC	:::::::::0::13:13::19:19:20:20:39:::
777	TGTGCCAGATTAAACCGGGACTCCACGGACTCCTATAATTCACCCCTCCACTTT	TRBV21-1	TRBD2	TRBJ1-6	TRBV21	TRBJ1	CARLNRDSTDSYNSPLHF	TGTGCCAGATTAAACCGGGACTCCACGGACTCCTATAATTCACCCCTCCACTTT	:::::::::0::8:14:16::22:26:29:54:::
778	TGTGCCAGCAAACAGGATTATAGCAATCAGCCCCAGCATTTT	TRBV6-1	TRBD1	TRBJ1-5	TRBV6	TRBJ1	CASKQDYSNQPQHF	TGTGCCAGCAAACAGGATTATAGCAATCAGCCCCAGCATTTT	:::::::::0::10:11:::16:18:20:42:::
779	TGTGCCAGCAACCCGGGGACGGCCTATGGCTACACCTTC	TRBV6-1	TRBD1	TRBJ1-2	TRBV6	TRBJ1	CASNPGTAYGYTF	TGTGCCAGCAACCCGGGGACGGCCTATGGCTACACCTTC	:::::::::0::10:11:14::17:23::39:::
780	TGTGCCAGCAACCCGGGGGGGGGCTATGAGCAGTTCTTC	TRBV9	TRBD1	TRBJ2-1	TRBV9*00	TRBJ2	CASNPGGGYEQFF	TGTGCCAGCAACCCGGGGGGGGGCTATGAGCAGTTCTTC	:::::::::0::10:11:14::17:25::39:::
781	TGTGCCAGCAACCGCGGGGGGGCAAATGAGCAGTTCTTC	TRBV2	TRBD2	TRBJ2-1	TRBV2*00	TRBJ2	CASNRGGANEQFF	TGTGCCAGCAACCGCGGGGGGGCAAATGAGCAGTTCTTC	:::::::::0::10:13::22:23:24::39:::
782	TGTGCCAGCAACGGACAGGGGAGGTACGAGCAGTACTTC	TRBV2	TRBD1	TRBJ2-7	TRBV2*00	TRBJ2	CASNGQGRYEQYF	TGTGCCAGCAACGGACAGGGGAGGTACGAGCAGTACTTC	:::::::::0::10:12:::21:24::39:::
783	TGTGCCAGCAACGGACAGGGGAGTTACGAGCAGTACTTC	TRBV2	TRBD1	TRBJ2-7	TRBV2*00	TRBJ2	CASNGQGSYEQYF	TGTGCCAGCAACGGACAGGGGAGTTACGAGCAGTACTTC	:::::::::0::10:12:::21:24::39:::
784	TGTGCCAGCAACTACCGACCCGGACATGAGACCCACTACTTC	TRBV7-4	TRBD1	TRBJ2-5	TRBV7	TRBJ2	CASNYRPGHETHYF	TGTGCCAGCAACTACCGACCCGGACATGAGACCCACTACTTC	:::::::::0::13:18:21::23:24::42:::
785	TGTGCCAGCAAGCCGGGACAGGACTACACCGGGGAGCTGTTTTTT	TRBV6-1	TRBD1	TRBJ2-2	TRBV6	TRBJ2	CASKPGQDYTGELFF	TGTGCCAGCAAGCCGGGACAGGACTACACCGGGGAGCTGTTTTTT	:::::::::0::10:12:14::22:25::45:::
786	TGTGCCAGCAAGCCGGGACAGGACTACTCCGGGGAGCTGTTTTTT	TRBV6-1	TRBD1	TRBJ2-2	TRBV6	TRBJ2	CASKPGQDYSGELFF	TGTGCCAGCAAGCCGGGACAGGACTACTCCGGGGAGCTGTTTTTT	:::::::::0::10:12:14::22:25::45:::
787	TGTGCCAGCAAGGGGGGTGGCAATCAGCCCCAGCATTTT	TRBV12-3	TRBD1	TRBJ1-5	TRBV12	TRBJ1	CASKGGGNQPQHF	TGTGCCAGCAAGGGGGGTGGCAATCAGCCCCAGCATTTT	:::::::::0::10:10:::16:19::39:::
788	TGTGCCAGCAATACACAGGGGGGACCTGAAGCTTTCTTT	TRBV5-4	TRBD1	TRBJ1-1	TRBV5	TRBJ1	CASNTQGGPEAFF	TGTGCCAGCAATACACAGGGGGGACCTGAAGCTTTCTTT	:::::::::0::10:14:::22:25::39:::
789	TGTGCCAGCAATGCAGGGAACACCGGGGAGCTGTTTTTT	TRBV9		TRBJ2-2	TRBV9*00	TRBJ2	CASNAGNTGELFF	TGTGCCAGCAATGCAGGGAACACCGGGGAGCTGTTTTTT	:::::::::0::10:::::17::39:::
790	TGTGCCAGCAATGCAGGGGCCGCGAACGAGCAGTACTTC	TRBV6-1	TRBD2	TRBJ2-7	TRBV6	TRBJ2	CASNAGAANEQYF	TGTGCCAGCAATGCAGGGGCCGCGAACGAGCAGTACTTC	:::::::::0::16:16::19:21:25::39:::
791	TGTGCCAGCAATGCAGGGGCCGGGAACGAGCAGTACTTC	TRBV6-1	TRBD1	TRBJ2-7	TRBV6	TRBJ2	CASNAGAGNEQYF	TGTGCCAGCAATGCAGGGGCCGGGAACGAGCAGTACTTC	:::::::::0::16:19:21::25:25::39:::
792	TGTGCCAGCAATGGACAGGGGGCCTACGAGCAGTACTTC	TRBV6-2	TRBD1	TRBJ2-7	TRBV6	TRBJ2	CASNGQGAYEQYF	TGTGCCAGCAATGGACAGGGGGCCTACGAGCAGTACTTC	:::::::::0::10:12:::22:22::39:::
793	TGTGCCAGCACCAGCACCGGGACAGGGGCCTATGGCTACACCTTC	TRBV2	TRBD1	TRBJ1-2	TRBV2*00	TRBJ1	CASTSTGTGAYGYTF	TGTGCCAGCACCAGCACCGGGACAGGGGCCTATGGCTACACCTTC	:::::::::0::10:16:18::28:29::45:::
794	TGTGCCAGCACCCAAGGGGGGGCCCCCTACAATGAGCAGTTCTTC	TRBV7-3	TRBD1	TRBJ2-1	TRBV7	TRBJ2	CASTQGGAPYNEQFF	TGTGCCAGCACCCAAGGGGGGGCCCCCTACAATGAGCAGTTCTTC	:::::::::0::10:14::21:25:25::45:::
795	TGTGCCAGCACCCAGACCGGGGACACCATATATTTT	TRBV28	TRBD1	TRBJ1-3	TRBV28*00	TRBJ1	CASTQTGDTIYF	TGTGCCAGCACCCAGACCGGGGACACCATATATTTT	:::::::::0::10:14:::22:22::36:::
796	TGTGCCAGCACCCAGGGCAGTGAGGCCTACGAGCAGTACTTC	TRBV9	TRBD1	TRBJ2-7	TRBV9*00	TRBJ2	CASTQGSEAYEQYF	TGTGCCAGCACCCAGGGCAGTGAGGCCTACGAGCAGTACTTC	:::::::::0::10:12:::17:25::42:::
797	TGTGCCAGCACCCATACCGGGACAGGGGCCTACGAGCAGTACTTC	TRBV5-8	TRBD1	TRBJ2-7	TRBV5	TRBJ2	CASTHTGTGAYEQYF	TGTGCCAGCACCCATACCGGGACAGGGGCCTACGAGCAGTACTTC	:::::::::0::10:16:18::28:28::45:::
798	TGTGCCAGCACCCCAGGGGCTGGTCAGCCCCAGCATTTT	TRBV6-1	TRBD1	TRBJ1-5	TRBV6	TRBJ1	CASTPGAGQPQHF	TGTGCCAGCACCCCAGGGGCTGGTCAGCCCCAGCATTTT	:::::::::0::10:13:::19:23::39:::
799	TGTGCCAGCACCCCCGGGACAGAAAGCTACGAGCAGTACTTC	TRBV6-2	TRBD1	TRBJ2-7	TRBV6	TRBJ2	CASTPGTESYEQYF	TGTGCCAGCACCCCCGGGACAGAAAGCTACGAGCAGTACTTC	:::::::::0::10:12:15::22:26::42:::
800	TGTGCCAGCACCCCCGGGACCGAAAGGTACGAGCAGTACTTC	TRBV6-2	TRBD1	TRBJ2-7	TRBV6	TRBJ2	CASTPGTERYEQYF	TGTGCCAGCACCCCCGGGACCGAAAGGTACGAGCAGTACTTC	:::::::::0::10:12:15::20:27::42:::
801	TGTGCCAGCACCCCCTCTGGGACAGGGGCATATGGCTACACCTTC	TRBV6-2	TRBD1	TRBJ1-2	TRBV6	TRBJ1	CASTPSGTGAYGYTF	TGTGCCAGCACCCCCTCTGGGACAGGGGCATATGGCTACACCTTC	:::::::::0::10:18:18::28:30::45:::
802	TGTGCCAGCACCCCGGCCCCTAACACTGAAGCTTTCTTT	TRBV2	TRBD1	TRBJ1-1	TRBV2*00	TRBJ1	CASTPAPNTEAFF	TGTGCCAGCACCCCGGCCCCTAACACTGAAGCTTTCTTT	:::::::::0::10:13::14:21:21::39:::
803	TGTGCCAGCACCCCGGGGGGCGGTCAGCCCCAGCATTTT	TRBV27	TRBD1	TRBJ1-5	TRBV27*00	TRBJ1	CASTPGGGQPQHF	TGTGCCAGCACCCCGGGGGGCGGTCAGCCCCAGCATTTT	:::::::::0::10:15::21:22:23::39:::
804	TGTGCCAGCACCCGAGGGGGGGGAATCAGTACGCAGTATTTT	TRBV7-2	TRBD1	TRBJ2-3	TRBV7	TRBJ2	CASTRGGGISTQYF	TGTGCCAGCACCCGAGGGGGGGGAATCAGTACGCAGTATTTT	:::::::::0::10:14:::20:26::42:::
805	TGTGCCAGCACCCTTAGCGGGGGGGCCGTCTTCGAGCAGTACTTC	TRBV13	TRBD2	TRBJ2-7	TRBV13*00	TRBJ2	CASTLSGGAVFEQYF	TGTGCCAGCACCCTTAGCGGGGGGGCCGTCTTCGAGCAGTACTTC	:::::::::0::17:17::25:27:29::45:::
806	TGTGCCAGCACCCTTAGCGGGGGGGCCGTCTTCGAGCAGTTCTTC	TRBV13	TRBD2	TRBJ2-7	TRBV13*00	TRBJ2	CASTLSGGAVFEQFF	TGTGCCAGCACCCTTAGCGGGGGGGCCGTCTTCGAGCAGTTCTTC	:::::::::0::17:17::25:27:29::45:::
807	TGTGCCAGCACCTTACCCCGGAGACCTAGCACAGATACGCAGTATTTT	TRBV21-1	TRBD1	TRBJ2-3	TRBV21	TRBJ2	CASTLPRRPSTDTQYF	TGTGCCAGCACCTTACCCCGGAGACCTAGCACAGATACGCAGTATTTT	:::::::::0::10:16:19::25:25:27:48:::
808	TGTGCCAGCACGGCCGGAAGGAACAATGAGCAGTTCTTC	TRBV2		TRBJ2-1	TRBV2*00	TRBJ2	CASTAGRNNEQFF	TGTGCCAGCACGGCCGGAAGGAACAATGAGCAGTTCTTC	:::::::::0::10:::::22::39:::
809	TGTGCCAGCACTCCCGGACGAGGGCAGCCCCAGCATTTT	TRBV28	TRBD1	TRBJ1-5	TRBV28*00	TRBJ1	CASTPGRGQPQHF	TGTGCCAGCACTCCCGGACGAGGGCAGCCCCAGCATTTT	:::::::::0::10:11:15::24:24::39:::
810	TGTGCCAGCACTCCCGGGCCGGGGACGCCCCAGCATTTT	TRBV6-1	TRBD1	TRBJ1-5	TRBV6	TRBJ1	CASTPGPGTPQHF	TGTGCCAGCACTCCCGGGCCGGGGACGCCCCAGCATTTT	:::::::::0::10:11:15::24:26::39:::
811	TGTGCCAGCACTCCCGGTCGAGGGCAGCCCCAGCATTTT	TRBV28	TRBD1	TRBJ1-5	TRBV28*00	TRBJ1	CASTPGRGQPQHF	TGTGCCAGCACTCCCGGTCGAGGGCAGCCCCAGCATTTT	:::::::::0::10:11:15::17:24::39:::
812	TGTGCCAGCACTGGGGGAGGTGCCCCCTACAATGAGCAGTTCTTC	TRBV9	TRBD2	TRBJ2-1	TRBV9*00	TRBJ2	CASTGGGAPYNEQFF	TGTGCCAGCACTGGGGGAGGTGCCCCCTACAATGAGCAGTTCTTC	:::::::::0::10:14::22:25:25::45:::
813	TGTGCCAGCAGAAAGACTAGCGGGGGATGGATGGAGCAGTACGTC	TRBV5-6	TRBD2	TRBJ2-7	TRBV5	TRBJ2	CASRKTSGGWMEQYV	TGTGCCAGCAGAAAGACTAGCGGGGGATGGATGGAGCAGTACGTC	:::::::::0::11:14:::24:33::45:::
814	TGTGCCAGCAGAACAAAGATGAACACTGAAGCTTTCTTT	TRBV6-1		TRBJ1-1	TRBV6	TRBJ1	CASRTKMNTEAFF	TGTGCCAGCAGAACAAAGATGAACACTGAAGCTTTCTTT	:::::::::0::11:::::18:19:39:::
815	TGTGCCAGCAGAACACAACAGGGGAAGGGGTCCTACGAGCAGTACTTC	TRBV14	TRBD1	TRBJ2-7	TRBV14*00	TRBJ2	CASRTQQGKGSYEQYF	TGTGCCAGCAGAACACAACAGGGGAAGGGGTCCTACGAGCAGTACTTC	:::::::::0::11:17:::24:30::48:::
816	TGTGCCAGCAGACAAGATCGGCGGGCGCTTGAGCAGTTCTTC	TRBV4-2	TRBD1	TRBJ2-1	TRBV4	TRBJ2	CASRQDRRALEQFF	TGTGCCAGCAGACAAGATCGGCGGGCGCTTGAGCAGTTCTTC	:::::::::0:17:19:22::26:28:29::42:::
817	TGTGCCAGCAGACAAGGTGAAAGGCAGGGTGAAAAACTGTTTTTT	TRBV21-1	TRBD1	TRBJ1-4	TRBV21	TRBJ1	CASRQGERQGEKLFF	TGTGCCAGCAGACAAGGTGAAAGGCAGGGTGAAAAACTGTTTTTT	:::::::::0::15:24:::29:29::45:::
818	TGTGCCAGCAGACAGGGGGGGGGTCAGCCCCAGCATTTT	TRBV19	TRBD1	TRBJ1-5	TRBV19*00	TRBJ1	CASRQGGGQPQHF	TGTGCCAGCAGACAGGGGGGGGGTCAGCCCCAGCATTTT	:::::::::0::11:11:::19:23::39:::
819	TGTGCCAGCAGACCACAACAGGTGAAGGGGTCCTACGAGCAGTACTTC	TRBV14	TRBD1	TRBJ2-7	TRBV14*00	TRBJ2	CASRPQQVKGSYEQYF	TGTGCCAGCAGACCACAACAGGTGAAGGGGTCCTACGAGCAGTACTTC	:::::::::0::15:17:::22:30::48:::
820	TGTGCCAGCAGACCAGGGCCGTCGGGGTGGCAGTATTTT	TRBV6-2	TRBD2	TRBJ2-3	TRBV6	TRBJ2	CASRPGPSGWQYF	TGTGCCAGCAGACCAGGGCCGTCGGGGTGGCAGTATTTT	:::::::::0::11:14::18:23:29::39:::
821	TGTGCCAGCAGACCAGGGGGGGTGGGTTACAATGAGCAGTTCGTC	TRBV9	TRBD1	TRBJ2-1	TRBV9*00	TRBJ2	CASRPGGVGYNEQFV	TGTGCCAGCAGACCAGGGGGGGTGGGTTACAATGAGCAGTTCGTC	:::::::::0::11:13:::20:27::45:::
822	TGTGCCAGCAGACCCGGGACTGCCTACGAGCAGTACTTC	TRBV6-1		TRBJ2-7	TRBV6	TRBJ2	CASRPGTAYEQYF	TGTGCCAGCAGACCCGGGACTGCCTACGAGCAGTACTTC	:::::::::0::11:::::16:19:39:::
823	TGTGCCAGCAGACCGGGGCCGTGGGGTATTGCTTTCTTT	TRBV6-1	TRBD1	TRBJ1-1	TRBV6	TRBJ1	CASRPGPWGIAFF	TGTGCCAGCAGACCGGGGCCGTGGGGTATTGCTTTCTTT	:::::::::0::11:12:14::17:30::39:::
824	TGTGCCAGCAGAGAGGGTTCCCCCTACAATGAGCAGTTCTTC	TRBV9	TRBD2	TRBJ2-1	TRBV9*00	TRBJ2	CASREGSPYNEQFF	TGTGCCAGCAGAGAGGGTTCCCCCTACAATGAGCAGTTCTTC	:::::::::0::11:12::17:17:22::42:::
825	TGTGCCAGCAGAGCAGGGGCCACAGATACGCAGTATTTT	TRBV6-1	TRBD1	TRBJ2-3	TRBV6	TRBJ2	CASRAGATDTQYF	TGTGCCAGCAGAGCAGGGGCCACAGATACGCAGTATTTT	:::::::::0::11:13:::19:20::39:::
826	TGTGCCAGCAGCAAAGATCTGTTGGGAATTTATGGCTACACCTTC	TRBV4-2		TRBJ1-2	TRBV4	TRBJ1	CASSKDLLGIYGYTF	TGTGCCAGCAGCAAAGATCTGTTGGGAATTTATGGCTACACCTTC	:::::::::0:17:20:::::30::45:::
827	TGTGCCAGCAGCAAAGGACAGGCCTACGAGCAGTACTTC	TRBV13	TRBD1	TRBJ2-7	TRBV13*00	TRBJ2	CASSKGQAYEQYF	TGTGCCAGCAGCAAAGGACAGGCCTACGAGCAGTACTTC	:::::::::0::12:15:::22:22::39:::
828	TGTGCCAGCAGCAACAGGAATCAGCCCCAGCATTTT	TRBV13		TRBJ1-5	TRBV13*00	TRBJ1	CASSNRNQPQHF	TGTGCCAGCAGCAACAGGAATCAGCCCCAGCATTTT	:::::::::0::12:::::15::36:::
829	TGTGCCAGCAGCAACCGGGGGAACACTGAAGCTTTCTTT	TRBV7-6	TRBD1	TRBJ1-1	TRBV7	TRBJ1	CASSNRGNTEAFF	TGTGCCAGCAGCAACCGGGGGAACACTGAAGCTTTCTTT	:::::::::0::12:14:16::19:20::39:::
830	TGTGCCAGCAGCAAGGGGACATTTCACACCGGGGAGCTGTTTTTT	TRBV21-1	TRBD1	TRBJ2-2	TRBV21	TRBJ2	CASSKGTFHTGELFF	TGTGCCAGCAGCAAGGGGACATTTCACACCGGGGAGCTGTTTTTT	:::::::::0::14:15:15::21:25::45:::
831	TGTGCCAGCAGCACCGCCGGAGGAGCCTATGGCTACACCTTC	TRBV6-8	TRBD2	TRBJ1-2	TRBV6	TRBJ1	CASSTAGGAYGYTF	TGTGCCAGCAGCACCGCCGGAGGAGCCTATGGCTACACCTTC	:::::::::0::11:15:::23:26::42:::
832	TGTGCCAGCAGCACCGGGGGGGTGCCGTACAATGAGCAGTTCTTC	TRBV9	TRBD1	TRBJ2-1	TRBV9*00	TRBJ2	CASSTGGVPYNEQFF	TGTGCCAGCAGCACCGGGGGGGTGCCGTACAATGAGCAGTTCTTC	:::::::::0::12:17::23:26:27::45:::
833	TGTGCCAGCAGCACCGGGGGGGTGCCGTACAATGAGCCGTTCTTC	TRBV9	TRBD1	TRBJ2-1	TRBV9*00	TRBJ2	CASSTGGVPYNEPFF	TGTGCCAGCAGCACCGGGGGGGTGCCGTACAATGAGCCGTTCTTC	:::::::::0::12:17::23:26:27::45:::
834	TGTGCCAGCAGCACCGGGGGGGTGTCCTACAATGAGCAGTTCTTC	TRBV9	TRBD1	TRBJ2-1	TRBV9*00	TRBJ2	CASSTGGVSYNEQFF	TGTGCCAGCAGCACCGGGGGGGTGTCCTACAATGAGCAGTTCTTC	:::::::::0::12:12:::20:24::45:::
835	TGTGCCAGCAGCAGAGGGACAGCGGCCTACGAGCAGTACTTC	TRBV9	TRBD2	TRBJ2-7	TRBV9*00	TRBJ2	CASSRGTAAYEQYF	TGTGCCAGCAGCAGAGGGACAGCGGCCTACGAGCAGTACTTC	:::::::::0::12:15:15::25:25::42:::
836	TGTGCCAGCAGCAGAGGGGGGGTTCCCTACAATGAGCAGTTCTTC	TRBV9	TRBD1	TRBJ2-1	TRBV9*00	TRBJ2	CASSRGGVPYNEQFF	TGTGCCAGCAGCAGAGGGGGGGTTCCCTACAATGAGCAGTTCTTC	:::::::::0::12:14:::20:25::45:::
837	TGTGCCAGCAGCAGCGGGGGGGCCTATGAGCAGTTCTTC	TRBV6-2	TRBD2	TRBJ2-1	TRBV6	TRBJ2	CASSSGGAYEQFF	TGTGCCAGCAGCAGCGGGGGGGCCTATGAGCAGTTCTTC	:::::::::0::11:12::22:24:25::39:::
838	TGTGCCAGCAGCAGCTCACACTACAATGAGCAGTTCTTC	TRBV9		TRBJ2-1	TRBV9*00	TRBJ2	CASSSSHYNEQFF	TGTGCCAGCAGCAGCTCACACTACAATGAGCAGTTCTTC	:::::::::0::12:::::20::39:::
839	TGTGCCAGCAGCAGGGGTAATGCCTACGAGCAGTACTTC	TRBV27	TRBD1	TRBJ2-7	TRBV27*00	TRBJ2	CASSRGNAYEQYF	TGTGCCAGCAGCAGGGGTAATGCCTACGAGCAGTACTTC	:::::::::0::11:11:::17:22::39:::
840	TGTGCCAGCAGCATACTAGCGGGGGGACTCTACGAGCAGTACTTC	TRBV12-4	TRBD2	TRBJ2-7	TRBV12	TRBJ2	CASSILAGGLYEQYF	TGTGCCAGCAGCATACTAGCGGGGGGACTCTACGAGCAGTACTTC	:::::::::0::11:14:::23:24:27:45:::
841	TGTGCCAGCAGCATAGACGGCCTTCCCTACAATGAGCAGTTCTTC	TRBV9		TRBJ2-1	TRBV9*00	TRBJ2	CASSIDGLPYNEQFF	TGTGCCAGCAGCATAGACGGCCTTCCCTACAATGAGCAGTTCTTC	:::::::::0:16:16:::::25::45:::
842	TGTGCCAGCAGCATAGGACTAGGAGGCACAAGTGAGCAGTTCTTC	TRBV5-4	TRBD2	TRBJ2-1	TRBV5	TRBJ2	CASSIGLGGTSEQFF	TGTGCCAGCAGCATAGGACTAGGAGGCACAAGTGAGCAGTTCTTC	:::::::::0::12:15:::22:27::45:::
843	TGTGCCAGCAGCATATGCCTGGAGGCCTACGAGCAGTACTTC	TRBV9	TRBD2	TRBJ2-7	TRBV9*00	TRBJ2	CASSICLEAYEQYF	TGTGCCAGCAGCATATGCCTGGAGGCCTACGAGCAGTACTTC	:::::::::0::15:20:::25:25::42:::
844	TGTGCCAGCAGCATGACACCCAACAATGAGCAGTTCTTC	TRBV6-1		TRBJ2-1	TRBV6	TRBJ2	CASSMTPNNEQFF	TGTGCCAGCAGCATGACACCCAACAATGAGCAGTTCTTC	:::::::::0::11:::::19::39:::
845	TGTGCCAGCAGCATGGGGGGCGCTCCCTACAATGAGCAGTTCTTC	TRBV9		TRBJ2-1	TRBV9*00	TRBJ2	CASSMGGAPYNEQFF	TGTGCCAGCAGCATGGGGGGCGCTCCCTACAATGAGCAGTTCTTC	:::::::::0::12:::::18:22:45:::
846	TGTGCCAGCAGCCAAACAGGGGGCATTCAGTACTTC	TRBV14	TRBD1	TRBJ2-4	TRBV14*00	TRBJ2	CASSQTGGIQYF	TGTGCCAGCAGCCAAACAGGGGGCATTCAGTACTTC	:::::::::0::15:15:::23:23::36:::
847	TGTGCCAGCAGCCAAACCCCCCCCGGTGGCTACACCTTC	TRBV12-3	TRBD2	TRBJ1-2	TRBV12	TRBJ1	CASSQTPPGGYTF	TGTGCCAGCAGCCAAACCCCCCCCGGTGGCTACACCTTC	:::::::::0::11:17:::25:26::39:::
848	TGTGCCAGCAGCCAAACTAGCGTTGACTACGAGCAGTACTTC	TRBV4-2	TRBD2	TRBJ2-7	TRBV4	TRBJ2	CASSQTSVDYEQYF	TGTGCCAGCAGCCAAACTAGCGTTGACTACGAGCAGTACTTC	:::::::::0::15:15:::22:26::42:::
849	TGTGCCAGCAGCCAAACTAGCGTTGCCTACGAGCAGTACTTC	TRBV4-2	TRBD2	TRBJ2-7	TRBV4	TRBJ2	CASSQTSVAYEQYF	TGTGCCAGCAGCCAAACTAGCGTTGCCTACGAGCAGTACTTC	:::::::::0::15:15:::22:25::42:::
850	TGTGCCAGCAGCCAACAGGGATCTAATTCACCCCTCCACTTT	TRBV6-1	TRBD1	TRBJ1-6	TRBV6	TRBJ1	CASSQQGSNSPLHF	TGTGCCAGCAGCCAACAGGGATCTAATTCACCCCTCCACTTT	:::::::::0::11:14:::20:23::42:::
851	TGTGCCAGCAGCCAACCTAGCGTTGCCTACGAGCAGTACTTC	TRBV4-2	TRBD2	TRBJ2-7	TRBV4	TRBJ2	CASSQPSVAYEQYF	TGTGCCAGCAGCCAACCTAGCGTTGCCTACGAGCAGTACTTC	:::::::::0::15:16:::22:25::42:::
852	TGTGCCAGCAGCCAAGAAGCGACTAGCGGGGGCAATGAGCAGTTCTTC	TRBV4-2	TRBD2	TRBJ2-1	TRBV4	TRBJ2	CASSQEATSGGNEQFF	TGTGCCAGCAGCCAAGAAGCGACTAGCGGGGGCAATGAGCAGTTCTTC	:::::::::0:17:17:20:::30:32::48:::
853	TGTGCCAGCAGCCAAGAAGGACCATCCCGCGAGCAGTACTTC	TRBV3-2		TRBJ2-7	TRBV3	TRBJ2	CASSQEGPSREQYF	TGTGCCAGCAGCCAAGAAGGACCATCCCGCGAGCAGTACTTC	:::::::::0:17:17:::::17:22:42:::
854	TGTGCCAGCAGCCAAGAAGGCCGGGGAGCTTTCTTT	TRBV4-2	TRBD1	TRBJ1-1	TRBV4	TRBJ1	CASSQEGRGAFF	TGTGCCAGCAGCCAAGAAGGCCGGGGAGCTTTCTTT	:::::::::0:17:17:20:22::25:26::36:::
855	TGTGCCAGCAGCCAAGAAGGGACAGGGACTAATTCACCCCTCCACTTT	TRBV3-1	TRBD1	TRBJ1-6	TRBV3	TRBJ1	CASSQEGTGTNSPLHF	TGTGCCAGCAGCCAAGAAGGGACAGGGACTAATTCACCCCTCCACTTT	:::::::::0:17:17:18:18::27:29::48:::
856	TGTGCCAGCAGCCAAGAAGGGATAGCGCGAGAGCAGTACTTC	TRBV4-2	TRBD2	TRBJ2-7	TRBV4	TRBJ2	CASSQEGIAREQYF	TGTGCCAGCAGCCAAGAAGGGATAGCGCGAGAGCAGTACTTC	:::::::::0:17:17:18:18::30:30::42:::
857	TGTGCCAGCAGCCAAGAAGGTTCCGCAGGGTTCGAGACCCAGTACTTC	TRBV4-2	TRBD1	TRBJ2-5	TRBV4	TRBJ2	CASSQEGSAGFETQYF	TGTGCCAGCAGCCAAGAAGGTTCCGCAGGGTTCGAGACCCAGTACTTC	:::::::::0:17:17:25:::30:33::48:::
858	TGTGCCAGCAGCCAAGAAGGTTCCGCGGGGTTGGAGACCCAGTACTTC	TRBV4-2	TRBD2	TRBJ2-5	TRBV4	TRBJ2	CASSQEGSAGLETQYF	TGTGCCAGCAGCCAAGAAGGTTCCGCGGGGTTGGAGACCCAGTACTTC	:::::::::0:17:17:24:::29:33::48:::
859	TGTGCCAGCAGCCAAGAAGTCGGCGGGGGGGCAGATACGCAGTATTTT	TRBV4-2	TRBD2	TRBJ2-3	TRBV4	TRBJ2	CASSQEVGGGADTQYF	TGTGCCAGCAGCCAAGAAGTCGGCGGGGGGGCAGATACGCAGTATTTT	:::::::::0:17:17:22::31:31:31::48:::
860	TGTGCCAGCAGCCAAGAATCGACTAGCGGGGGGGTACCGAAGTACTTC	TRBV4-2	TRBD2	TRBJ2-4	TRBV4	TRBJ2	CASSQESTSGGVPKYF	TGTGCCAGCAGCCAAGAATCGACTAGCGGGGGGGTACCGAAGTACTTC	:::::::::0:17:17:20::34:34:40::48:::
861	TGTGCCAGCAGCCAAGAATGGACTAGCGGGGAAGAGACCCAGTACTTC	TRBV4-2	TRBD2	TRBJ2-5	TRBV4	TRBJ2	CASSQEWTSGEETQYF	TGTGCCAGCAGCCAAGAATGGACTAGCGGGGAAGAGACCCAGTACTTC	:::::::::0:17:17:19:::30:31::48:::
862	TGTGCCAGCAGCCAAGACCACAGCCTCTCTCCCCAGCTTTTT	TRBV4-1		TRBJ1-5	TRBV4	TRBJ1	CASSQDHSLSPQLF	TGTGCCAGCAGCCAAGACCACAGCCTCTCTCCCCAGCTTTTT	:::::::::0:17:17:::::30::42:::
863	TGTGCCAGCAGCCAAGAGAACAGGAGGCCTTCAGCCCTCCACTTT	TRBV4-2	TRBD1	TRBJ1-6	TRBV4	TRBJ1	CASSQENRRPSALHF	TGTGCCAGCAGCCAAGAGAACAGGAGGCCTTCAGCCCTCCACTTT	:::::::::0:17:17:19::28:28:29::45:::
864	TGTGCCAGCAGCCAAGAGAACAGGGGGCCCTCACCCCTGCACTTT	TRBV4-2	TRBD1	TRBJ1-6	TRBV4	TRBJ1	CASSQENRGPSPLHF	TGTGCCAGCAGCCAAGAGAACAGGGGGCCCTCACCCCTGCACTTT	:::::::::0:17:17:19::28:28:30::45:::
865	TGTGCCAGCAGCCAAGAGACCAGGGGGCCTTCTCCCCTCCACTTT	TRBV4-2	TRBD1	TRBJ1-6	TRBV4	TRBJ1	CASSQETRGPSPLHF	TGTGCCAGCAGCCAAGAGACCAGGGGGCCTTCTCCCCTCCACTTT	:::::::::0:17:17:20::28:28:29::45:::
866	TGTGCCAGCAGCCAAGAGAGCACCAACTACAATGAGCAGTTCTTC	TRBV4-2		TRBJ2-1	TRBV4	TRBJ2	CASSQESTNYNEQFF	TGTGCCAGCAGCCAAGAGAGCACCAACTACAATGAGCAGTTCTTC	:::::::::0:17:17:::::26::45:::
867	TGTGCCAGCAGCCAAGAGGGGAACTCTGGGGCCAACGTCCTGACTTTC	TRBV4-2		TRBJ2-6	TRBV4	TRBJ2	CASSQEGNSGANVLTF	TGTGCCAGCAGCCAAGAGGGGAACTCTGGGGCCAACGTCCTGACTTTC	:::::::::0:17:17:::::20:23:48:::
868	TGTGCCAGCAGCCAAGAGTCAAGGGGAGGCGAAAAACTGTTTTTT	TRBV4-2	TRBD2	TRBJ1-4	TRBV4	TRBJ1	CASSQESRGGEKLFF	TGTGCCAGCAGCCAAGAGTCAAGGGGAGGCGAAAAACTGTTTTTT	:::::::::0:17:17:23:::29:30::45:::
869	TGTGCCAGCAGCCAAGATAGGCCCCCTCAGTCTTTGGGG	TRBV3-1	TRBD1	TRBJ1-2	TRBV3	TRBJ1	CASSQDRPPQSLG	TGTGCCAGCAGCCAAGATAGGCCCCCTCAGTCTTTGGGG	:::::::::0:17:18:20:::27:39::39:::
870	TGTGCCAGCAGCCAAGATCAAGGTGACATCCGATCACCCCTCCACTTT	TRBV4-2		TRBJ1-6	TRBV4	TRBJ1	CASSQDQGDIRSPLHF	TGTGCCAGCAGCCAAGATCAAGGTGACATCCGATCACCCCTCCACTTT	:::::::::0:17:19:::::33::48:::
871	TGTGCCAGCAGCCAAGATCTGTTGGGAATTTATGGCTACACCTTC	TRBV4-2		TRBJ1-2	TRBV4	TRBJ1	CASSQDLLGIYGYTF	TGTGCCAGCAGCCAAGATCTGTTGGGAATTTATGGCTACACCTTC	:::::::::0:17:20:::::30::45:::
872	TGTGCCAGCAGCCAAGATGGGGGGGGGCAGCCCCAGCATTTT	TRBV4-2	TRBD1	TRBJ1-5	TRBV4	TRBJ1	CASSQDGGGQPQHF	TGTGCCAGCAGCCAAGATGGGGGGGGGCAGCCCCAGCATTTT	:::::::::0:17:18:18:::23:27::42:::
873	TGTGCCAGCAGCCAAGATGTGGCAGGGGGCTATGGCTACACCTTC	TRBV4-2	TRBD1	TRBJ1-2	TRBV4	TRBJ1	CASSQDVAGGYGYTF	TGTGCCAGCAGCCAAGATGTGGCAGGGGGCTATGGCTACACCTTC	:::::::::0:17:18:22:::29:29::45:::
874	TGTGCCAGCAGCCAAGCCGGGACAGCCTACGAGCAGTACTTC	TRBV4-2	TRBD1	TRBJ2-7	TRBV4	TRBJ2	CASSQAGTAYEQYF	TGTGCCAGCAGCCAAGCCGGGACAGCCTACGAGCAGTACTTC	:::::::::0::16:16:18::25:25::42:::
875	TGTGCCAGCAGCCAAGCTCTAGCATACGAGCAGTACTTC	TRBV4-2		TRBJ2-7	TRBV4	TRBJ2	CASSQALAYEQYF	TGTGCCAGCAGCCAAGCTCTAGCATACGAGCAGTACTTC	:::::::::0:17:20:::::24::39:::
876	TGTGCCAGCAGCCAAGGACAGGGGGAAGAGACCCAGTACTTC	TRBV3-2	TRBD1	TRBJ2-5	TRBV3	TRBJ2	CASSQGQGEETQYF	TGTGCCAGCAGCCAAGGACAGGGGGAAGAGACCCAGTACTTC	:::::::::0::16:16:::25:25::42:::
877	TGTGCCAGCAGCCAAGGAGGCAGCTACAATGAAAAACTGTTTTTT	TRBV4-2		TRBJ1-4	TRBV4	TRBJ1	CASSQGGSYNEKLFF	TGTGCCAGCAGCCAAGGAGGCAGCTACAATGAAAAACTGTTTTTT	:::::::::0::16:::::27::45:::
878	TGTGCCAGCAGCCAAGGAGGGGCCCCCTACAATGAGCAGTTCTTC	TRBV9	TRBD2	TRBJ2-1	TRBV9*00	TRBJ2	CASSQGGAPYNEQFF	TGTGCCAGCAGCCAAGGAGGGGCCCCCTACAATGAGCAGTTCTTC	:::::::::0::12:15::22:25:25::45:::
879	TGTGCCAGCAGCCAAGGAGGGGCCTACGAGCAGTACTTC	TRBV3-1	TRBD1	TRBJ2-7	TRBV3	TRBJ2	CASSQGGAYEQYF	TGTGCCAGCAGCCAAGGAGGGGCCTACGAGCAGTACTTC	:::::::::0::16:17:::22:22::39:::
880	TGTGCCAGCAGCCAAGGAGGGGGCGGCAATCAGCCCCAGCATTTT	TRBV4-2	TRBD1	TRBJ1-5	TRBV4	TRBJ1	CASSQGGGGNQPQHF	TGTGCCAGCAGCCAAGGAGGGGGCGGCAATCAGCCCCAGCATTTT	:::::::::0::16:17::24:25:25::45:::
881	TGTGCCAGCAGCCAAGGCGCGACAGGGGCATGGGAGCAGTACTTC	TRBV3-1	TRBD1	TRBJ2-7	TRBV3	TRBJ2	CASSQGATGAWEQYF	TGTGCCAGCAGCCAAGGCGCGACAGGGGCATGGGAGCAGTACTTC	:::::::::0::16:17:18::28:33::45:::
882	TGTGCCAGCAGCCAAGGCGGCCCCGCCGCCTACGAGCAGTACTTC	TRBV4-2	TRBD1	TRBJ2-7	TRBV4	TRBJ2	CASSQGGPAAYEQYF	TGTGCCAGCAGCCAAGGCGGCCCCGCCGCCTACGAGCAGTACTTC	:::::::::0::16:16::18:24:28::45:::
883	TGTGCCAGCAGCCAAGGGCAGAGTAATGAAAAACTGTTTTTT	TRBV3-1		TRBJ1-4	TRBV3	TRBJ1	CASSQGQSNEKLFF	TGTGCCAGCAGCCAAGGGCAGAGTAATGAAAAACTGTTTTTT	:::::::::0::16:::::23::42:::
884	TGTGCCAGCAGCCAAGGGGCGGGACTAGGCACAGATACGCAGTATTTT	TRBV3-1	TRBD2	TRBJ2-3	TRBV3	TRBJ2	CASSQGAGLGTDTQYF	TGTGCCAGCAGCCAAGGGGCGGGACTAGGCACAGATACGCAGTATTTT	:::::::::0::16:18:::24:24:26:48:::
885	TGTGCCAGCAGCCAAGGGGCGGGGGTAGTTTCTTACGAGCAGTACTTC	TRBV3-1	TRBD1	TRBJ2-7	TRBV3	TRBJ2	CASSQGAGVVSYEQYF	TGTGCCAGCAGCCAAGGGGCGGGGGTAGTTTCTTACGAGCAGTACTTC	:::::::::0::16:20:::25:30::48:::
886	TGTGCCAGCAGCCAAGGGGCTACGTTCTCCTACGAGCAGTACTTC	TRBV4-2		TRBJ2-7	TRBV4	TRBJ2	CASSQGATFSYEQYF	TGTGCCAGCAGCCAAGGGGCTACGTTCTCCTACGAGCAGTACTTC	:::::::::0::16:::::26:26:45:::
887	TGTGCCAGCAGCCAAGGGGGCTCTTCGCAGGCTTTCTTT	TRBV6-5	TRBD1	TRBJ1-1	TRBV6	TRBJ1	CASSQGGSSQAFF	TGTGCCAGCAGCCAAGGGGGCTCTTCGCAGGCTTTCTTT	:::::::::0::11:14::21:21:30::39:::
888	TGTGCCAGCAGCCAAGTCCAGGAGGTTGATCAGTTCTTC	TRBV3-1	TRBD2	TRBJ2-1	TRBV3	TRBJ2	CASSQVQEVDQFF	TGTGCCAGCAGCCAAGTCCAGGAGGTTGATCAGTTCTTC	:::::::::0::16:20:::25:26::39:::
889	TGTGCCAGCAGCCAAGTGTTGAACACCGGGGAGCTGTTTTTT	TRBV4-2		TRBJ2-2	TRBV4	TRBJ2	CASSQVLNTGELFF	TGTGCCAGCAGCCAAGTGTTGAACACCGGGGAGCTGTTTTTT	:::::::::0::16:::::20::42:::
890	TGTGCCAGCAGCCAATCCTCGACAGTCGGCTACACCTTC	TRBV14	TRBD1	TRBJ1-2	TRBV14*00	TRBJ1	CASSQSSTVGYTF	TGTGCCAGCAGCCAATCCTCGACAGTCGGCTACACCTTC	:::::::::0::15:20:::25:27::39:::
891	TGTGCCAGCAGCCAATCGTCCGGGGTTATAAACTATGGCTACACCTTC	TRBV16	TRBD1	TRBJ1-2	TRBV16*00	TRBJ1	CASSQSSGVINYGYTF	TGTGCCAGCAGCCAATCGTCCGGGGTTATAAACTATGGCTACACCTTC	:::::::::0:17:18:19:21::24:30::48:::
892	TGTGCCAGCAGCCACACCTCGGCTAGCGCCGCCTACGAGCAGTACTTC	TRBV6-5	TRBD2	TRBJ2-7	TRBV6	TRBJ2	CASSHTSASAAYEQYF	TGTGCCAGCAGCCACACCTCGGCTAGCGCCGCCTACGAGCAGTACTTC	:::::::::0::11:22:::28:31::48:::
893	TGTGCCAGCAGCCACATCGGAAGGGGACCCAACTACGAGCAGTACTTC	TRBV3-1	TRBD1	TRBJ2-7	TRBV3	TRBJ2	CASSHIGRGPNYEQYF	TGTGCCAGCAGCCACATCGGAAGGGGACCCAACTACGAGCAGTACTTC	:::::::::0::14:18:::26:32::48:::
894	TGTGCCAGCAGCCACCCCCGAGGACAGGGGGCTTATGTGAACACTGAAGCTTTCTTT	TRBV14	TRBD1	TRBJ1-1	TRBV14*00	TRBJ1	CASSHPRGQGAYVNTEAFF	TGTGCCAGCAGCCACCCCCGAGGACAGGGGGCTTATGTGAACACTGAAGCTTTCTTT	:::::::::0::14:16:19:32:32:37:37:57:::
895	TGTGCCAGCAGCCACCCCGGGGCAGAACAGTTCTTC	TRBV4-2	TRBD1	TRBJ2-1	TRBV4	TRBJ2	CASSHPGAEQFF	TGTGCCAGCAGCCACCCCGGGGCAGAACAGTTCTTC	:::::::::0::14:15:18::24:24::36:::
896	TGTGCCAGCAGCCACGAGAACAGGGGGCCCTCACCCCTCCACTTT	TRBV4-2	TRBD1	TRBJ1-6	TRBV4	TRBJ1	CASSHENRGPSPLHF	TGTGCCAGCAGCCACGAGAACAGGGGGCCCTCACCCCTCCACTTT	:::::::::0:17:17:19::28:28:30::45:::
897	TGTGCCAGCAGCCACGAGGGTTCCTACAATGAGCAGTTCTTC	TRBV3-1		TRBJ2-1	TRBV3	TRBJ2	CASSHEGSYNEQFF	TGTGCCAGCAGCCACGAGGGTTCCTACAATGAGCAGTTCTTC	:::::::::0:17:17:::::21::42:::
898	TGTGCCAGCAGCCACGGACAAATGGGCCAGCCCCAGCATTTT	TRBV27	TRBD1	TRBJ1-5	TRBV27*00	TRBJ1	CASSHGQMGQPQHF	TGTGCCAGCAGCCACGGACAAATGGGCCAGCCCCAGCATTTT	:::::::::0::11:15:::20:27::42:::
899	TGTGCCAGCAGCCACGGCGGGGTGGCCTACGAGCAGTACTTC	TRBV14	TRBD2	TRBJ2-7	TRBV14*00	TRBJ2	CASSHGGVAYEQYF	TGTGCCAGCAGCCACGGCGGGGTGGCCTACGAGCAGTACTTC	:::::::::0::14:16:::21:25::42:::
900	TGTGCCAGCAGCCACGGGGGAGCCTACGAGCAGTACTTC	TRBV7-8	TRBD1	TRBJ2-7	TRBV7	TRBJ2	CASSHGGAYEQYF	TGTGCCAGCAGCCACGGGGGAGCCTACGAGCAGTACTTC	:::::::::0::12:15:::20:22::39:::
901	TGTGCCAGCAGCCACTACCCCGGGACAGGGAGCGATGGCTACACCTTC	TRBV3-1	TRBD1	TRBJ1-2	TRBV3	TRBJ1	CASSHYPGTGSDGYTF	TGTGCCAGCAGCCACTACCCCGGGACAGGGAGCGATGGCTACACCTTC	:::::::::0::14:18:21:33:34:34::48:::
902	TGTGCCAGCAGCCACTCGTCCGTGGTTATAAACTATGGCTACACCTTC	TRBV16		TRBJ1-2	TRBV16*00	TRBJ1	CASSHSSVVINYGYTF	TGTGCCAGCAGCCACTCGTCCGTGGTTATAAACTATGGCTACACCTTC	:::::::::0:17:18:::::30::48:::
903	TGTGCCAGCAGCCAGACAGGGTCCCACGAGCAGTACTTC	TRBV11-2	TRBD1	TRBJ2-7	TRBV11	TRBJ2	CASSQTGSHEQYF	TGTGCCAGCAGCCAGACAGGGTCCCACGAGCAGTACTTC	:::::::::0::12:14:::21:21::39:::
904	TGTGCCAGCAGCCAGGAGGGACGCCCTTACAATGAGCAGTTCTTC	TRBV4-2	TRBD1	TRBJ2-1	TRBV4	TRBJ2	CASSQEGRPYNEQFF	TGTGCCAGCAGCCAGGAGGGACGCCCTTACAATGAGCAGTTCTTC	:::::::::0:17:17:17::22:26:27::45:::
905	TGTGCCAGCAGCCAGGGACAGGGGTCCTACGAGCAGTACTTC	TRBV4-2	TRBD1	TRBJ2-7	TRBV4	TRBJ2	CASSQGQGSYEQYF	TGTGCCAGCAGCCAGGGACAGGGGTCCTACGAGCAGTACTTC	:::::::::0::14:14:14::24:24::42:::
906	TGTGCCAGCAGCCAGGGTGAGAATCAGCCCCAGCATTTT	TRBV9	TRBD1	TRBJ1-5	TRBV9*00	TRBJ1	CASSQGENQPQHF	TGTGCCAGCAGCCAGGGTGAGAATCAGCCCCAGCATTTT	:::::::::0::12:12:::17:21::39:::
907	TGTGCCAGCAGCCATACAGGTTGGGAGTACTTC	TRBV14	TRBD1	TRBJ2-7	TRBV14*00	TRBJ2	CASSHTGWEYF	TGTGCCAGCAGCCATACAGGTTGGGAGTACTTC	:::::::::0::14:15:::20:25::33:::
908	TGTGCCAGCAGCCATGAGACAGGGGGCACCGGGGAGCTGTTTTTT	TRBV4-2	TRBD1	TRBJ2-2	TRBV4	TRBJ2	CASSHETGGTGELFF	TGTGCCAGCAGCCATGAGACAGGGGGCACCGGGGAGCTGTTTTTT	:::::::::0:17:17:17:::26:26::45:::
909	TGTGCCAGCAGCCATGCGCCGGGTTCCTACGAGCAGTACTTC	TRBV6-1	TRBD1	TRBJ2-7	TRBV6	TRBJ2	CASSHAPGSYEQYF	TGTGCCAGCAGCCATGCGCCGGGTTCCTACGAGCAGTACTTC	:::::::::0::11:18:20::23:24::42:::
910	TGTGCCAGCAGCCATGGCAGTACAAGCAATCAGCCCCAGCATTTT	TRBV3-2		TRBJ1-5	TRBV3	TRBJ1	CASSHGSTSNQPQHF	TGTGCCAGCAGCCATGGCAGTACAAGCAATCAGCCCCAGCATTTT	:::::::::0::14:::::24::45:::
911	TGTGCCAGCAGCCCAACCGGGACAGGGTCCTACGAGCAGTACTTC	TRBV3-1	TRBD1	TRBJ2-7	TRBV3	TRBJ2	CASSPTGTGSYEQYF	TGTGCCAGCAGCCCAACCGGGACAGGGTCCTACGAGCAGTACTTC	:::::::::0::13:16:18::27:27::45:::
912	TGTGCCAGCAGCCCACAGGGGAGCACTGAAGCTTTCTTT	TRBV3-1	TRBD1	TRBJ1-1	TRBV3	TRBJ1	CASSPQGSTEAFF	TGTGCCAGCAGCCCACAGGGGAGCACTGAAGCTTTCTTT	:::::::::0::13:14:::20:20::39:::
913	TGTGCCAGCAGCCCACAGGGGGCCTATGGCTACACCTTC	TRBV6-6	TRBD1	TRBJ1-2	TRBV6	TRBJ1	CASSPQGAYGYTF	TGTGCCAGCAGCCCACAGGGGGCCTATGGCTACACCTTC	:::::::::0::11:14::23:23:23::39:::
914	TGTGCCAGCAGCCCACGACAGGGGGCAGGGCCCCTCCACTTT	TRBV3-1	TRBD1	TRBJ1-6	TRBV3	TRBJ1	CASSPRQGAGPLHF	TGTGCCAGCAGCCCACGACAGGGGGCAGGGCCCCTCCACTTT	:::::::::0::13:16::26:26:30::42:::
915	TGTGCCAGCAGCCCAGACGCCGGGACAGCCTACGAGCAGTACTTC	TRBV9	TRBD1	TRBJ2-7	TRBV9*00	TRBJ2	CASSPDAGTAYEQYF	TGTGCCAGCAGCCCAGACGCCGGGACAGCCTACGAGCAGTACTTC	:::::::::0::12:19:21::28:28::45:::
916	TGTGCCAGCAGCCCAGACGCCGGGACAGGCTACGAGCAGTACTTC	TRBV9	TRBD1	TRBJ2-7	TRBV9*00	TRBJ2	CASSPDAGTGYEQYF	TGTGCCAGCAGCCCAGACGCCGGGACAGGCTACGAGCAGTACTTC	:::::::::0::12:19:21::29:29::45:::
917	TGTGCCAGCAGCCCAGACGCGGGGTCCTCCTACGAGCAGTACTTC	TRBV9	TRBD2	TRBJ2-7	TRBV9*00	TRBJ2	CASSPDAGSSYEQYF	TGTGCCAGCAGCCCAGACGCGGGGTCCTCCTACGAGCAGTACTTC	:::::::::0::12:18:::23:26:26:45:::
918	TGTGCCAGCAGCCCAGAGAATAGCAATCAGCCCCAGCATTTT	TRBV4-2		TRBJ1-5	TRBV4	TRBJ1	CASSPENSNQPQHF	TGTGCCAGCAGCCCAGAGAATAGCAATCAGCCCCAGCATTTT	:::::::::0:17:17:::::19:20:42:::
919	TGTGCCAGCAGCCCAGGAGGGGCCACTGAAGCTTTCTTT	TRBV9	TRBD2	TRBJ1-1	TRBV9*00	TRBJ1	CASSPGGATEAFF	TGTGCCAGCAGCCCAGGAGGGGCCACTGAAGCTTTCTTT	:::::::::0::12:15::21:21:23::39:::
920	TGTGCCAGCAGCCCAGGGACTGGTCAGGAAGCTTTCTTT	TRBV4-2	TRBD2	TRBJ1-1	TRBV4	TRBJ1	CASSPGTGQEAFF	TGTGCCAGCAGCCCAGGGACTGGTCAGGAAGCTTTCTTT	:::::::::0::16:16:::21:27::39:::
921	TGTGCCAGCAGCCCAGGGGCAGGTGCTGAAGCTTTCTTT	TRBV12-3	TRBD1	TRBJ1-1	TRBV12	TRBJ1	CASSPGAGAEAFF	TGTGCCAGCAGCCCAGGGGCAGGTGCTGAAGCTTTCTTT	:::::::::0::11:13:::19:25::39:::
922	TGTGCCAGCAGCCCAGGGGGGGTGGGTTACAATGAGCAGTTCTTC	TRBV9	TRBD1	TRBJ2-1	TRBV9*00	TRBJ2	CASSPGGVGYNEQFF	TGTGCCAGCAGCCCAGGGGGGGTGGGTTACAATGAGCAGTTCTTC	:::::::::0::12:13:::20:27::45:::
923	TGTGCCAGCAGCCCATCAACTAGCGGGGCCTCCTACGAGCAGTACGTC	TRBV27	TRBD2	TRBJ2-7	TRBV27*00	TRBJ2	CASSPSTSGASYEQYV	TGTGCCAGCAGCCCATCAACTAGCGGGGCCTCCTACGAGCAGTACGTC	:::::::::0::11:18:::27:29:29:48:::
924	TGTGCCAGCAGCCCATCCCTAGGGGGGGCATATGGCTACACCTTC	TRBV3-1	TRBD1	TRBJ1-2	TRBV3	TRBJ1	CASSPSLGGAYGYTF	TGTGCCAGCAGCCCATCCCTAGGGGGGGCATATGGCTACACCTTC	:::::::::0::13:20::27:29:30::45:::
925	TGTGCCAGCAGCCCCACACAGGGGGCTAGCACAGATACGCAGTATTTT	TRBV6-6	TRBD1	TRBJ2-3	TRBV6	TRBJ2	CASSPTQGASTDTQYF	TGTGCCAGCAGCCCCACACAGGGGGCTAGCACAGATACGCAGTATTTT	:::::::::0::11:17:::24:24:27:48:::
926	TGTGCCAGCAGCCCCACAGGTGGAACTGAAGCTTTCTTT	TRBV7-9	TRBD1	TRBJ1-1	TRBV7	TRBJ1	CASSPTGGTEAFF	TGTGCCAGCAGCCCCACAGGTGGAACTGAAGCTTTCTTT	:::::::::0::12:15:::23:24::39:::
927	TGTGCCAGCAGCCCCACCGACCTAGGGGCCTATGGCTACACCTTC	TRBV7-6	TRBD1	TRBJ1-2	TRBV7	TRBJ1	CASSPTDLGAYGYTF	TGTGCCAGCAGCCCCACCGACCTAGGGGCCTATGGCTACACCTTC	:::::::::0::12:23:::28:29::45:::
928	TGTGCCAGCAGCCCCACTTGCGTTGCTGGGGCCAACGTCCTGAATTTC	TRBV9		TRBJ2-6	TRBV9*00	TRBJ2	CASSPTCVAGANVLNF	TGTGCCAGCAGCCCCACTTGCGTTGCTGGGGCCAACGTCCTGAATTTC	:::::::::0::12:::::25::48:::
929	TGTGCCAGCAGCCCCACTTTCGTGGCTGGGGCCAACGGCCTGACTTTC	TRBV9		TRBJ2-6	TRBV9*00	TRBJ2	CASSPTFVAGANGLTF	TGTGCCAGCAGCCCCACTTTCGTGGCTGGGGCCAACGGCCTGACTTTC	:::::::::0::12:::::25::48:::
930	TGTGCCAGCAGCCCCAGAGGGGCTAGCGGGGCCCAGTACTTC	TRBV13	TRBD2	TRBJ2-5	TRBV13*00	TRBJ2	CASSPRGASGAQYF	TGTGCCAGCAGCCCCAGAGGGGCTAGCGGGGCCCAGTACTTC	:::::::::0::12:18:18::30:31::42:::
931	TGTGCCAGCAGCCCCATAAGCGGGGGGTACTACGAGCAGTACTTC	TRBV9	TRBD2	TRBJ2-7	TRBV9*00	TRBJ2	CASSPISGGYYEQYF	TGTGCCAGCAGCCCCATAAGCGGGGGGTACTACGAGCAGTACTTC	:::::::::0::12:18::27:27:29::45:::
932	TGTGCCAGCAGCCCCCATGGCGGGGCCGAGCAGTACTTC	TRBV7-2	TRBD1	TRBJ2-7	TRBV7	TRBJ2	CASSPHGGAEQYF	TGTGCCAGCAGCCCCCATGGCGGGGCCGAGCAGTACTTC	:::::::::0::12:21::26:26:26::39:::
933	TGTGCCAGCAGCCCCCCCGCTGGGGGACAGGGGGCTTACGAGCAGTACTTC	TRBV6-1	TRBD1	TRBJ2-7	TRBV6	TRBJ2	CASSPPAGGQGAYEQYF	TGTGCCAGCAGCCCCCCCGCTGGGGGACAGGGGGCTTACGAGCAGTACTTC	:::::::::0::11:23:23:35:35:36::51:::
934	TGTGCCAGCAGCCCCCCCGGACAGGGTATGAGTACCGGGGAGCTGTTTTTT	TRBV13	TRBD1	TRBJ2-2	TRBV13*00	TRBJ2	CASSPPGQGMSTGELFF	TGTGCCAGCAGCCCCCCCGGACAGGGTATGAGTACCGGGGAGCTGTTTTTT	:::::::::0::12:14:17::26:33::51:::
935	TGTGCCAGCAGCCCCCGCTACGAGCAGTACTTC	TRBV2	TRBD1	TRBJ2-7	TRBV2*00	TRBJ2	CASSPRYEQYF	TGTGCCAGCAGCCCCCGCTACGAGCAGTACTTC	:::::::::0::11:11:::16:17::33:::
936	TGTGCCAGCAGCCCCGACGGGGGAGGGAACTATGGCTACACCTTC	TRBV5-6	TRBD2	TRBJ1-2	TRBV5	TRBJ1	CASSPDGGGNYGYTF	TGTGCCAGCAGCCCCGACGGGGGAGGGAACTATGGCTACACCTTC	:::::::::0::12:20::27:27:27::45:::
937	TGTGCCAGCAGCCCCGCCACGTTGGGGGCGACCCGGGGGCAGTACTTC	TRBV27	TRBD1	TRBJ2-7	TRBV27*00	TRBJ2	CASSPATLGATRGQYF	TGTGCCAGCAGCCCCGCCACGTTGGGGGCGACCCGGGGGCAGTACTTC	:::::::::0::11:23::29:34:38::48:::
938	TGTGCCAGCAGCCCCGCCACGTTGGGGGCGACCGGGGGGCAGTACTTC	TRBV27	TRBD1	TRBJ2-7	TRBV27*00	TRBJ2	CASSPATLGATGGQYF	TGTGCCAGCAGCCCCGCCACGTTGGGGGCGACCGGGGGGCAGTACTTC	:::::::::0::11:23::29:33:38::48:::
939	TGTGCCAGCAGCCCCGGACAGGGGGAGGCGTATGGCTACACCTTC	TRBV6-1	TRBD1	TRBJ1-2	TRBV6	TRBJ1	CASSPGQGEAYGYTF	TGTGCCAGCAGCCCCGGACAGGGGGAGGCGTATGGCTACACCTTC	:::::::::0::11:11:14::25:30::45:::
940	TGTGCCAGCAGCCCCGGACTAGCGGTGGATGAGACCCAGTACTTC	TRBV3-1	TRBD2	TRBJ2-5	TRBV3	TRBJ2	CASSPGLAVDETQYF	TGTGCCAGCAGCCCCGGACTAGCGGTGGATGAGACCCAGTACTTC	:::::::::0::13:15:::25:30::45:::
941	TGTGCCAGCAGCCCCGGAGGGGAAGCCTATGGCTACACCTTC	TRBV6-2	TRBD2	TRBJ1-2	TRBV6	TRBJ1	CASSPGGEAYGYTF	TGTGCCAGCAGCCCCGGAGGGGAAGCCTATGGCTACACCTTC	:::::::::0::11:15::21:21:26::42:::
942	TGTGCCAGCAGCCCCGGGACAGCGTACGAGCAGTACTTC	TRBV7-2	TRBD1	TRBJ2-7	TRBV7	TRBJ2	CASSPGTAYEQYF	TGTGCCAGCAGCCCCGGGACAGCGTACGAGCAGTACTTC	:::::::::0::12:12:15::22:24::39:::
943	TGTGCCAGCAGCCCCGGGACAGCTAACTATGGCTACACCTTC	TRBV7-6	TRBD1	TRBJ1-2	TRBV7	TRBJ1	CASSPGTANYGYTF	TGTGCCAGCAGCCCCGGGACAGCTAACTATGGCTACACCTTC	:::::::::0::12:12:15::20:20:22:42:::
944	TGTGCCAGCAGCCCCGGGACAGGGAACTATGGCTACACCTTC	TRBV7-6	TRBD1	TRBJ1-2	TRBV7	TRBJ1	CASSPGTGNYGYTF	TGTGCCAGCAGCCCCGGGACAGGGAACTATGGCTACACCTTC	:::::::::0::12:12:15::24:24::42:::
945	TGTGCCAGCAGCCCCGGGACAGGGTACGAGCAGTACTTC	TRBV7-2	TRBD1	TRBJ2-7	TRBV7	TRBJ2	CASSPGTGYEQYF	TGTGCCAGCAGCCCCGGGACAGGGTACGAGCAGTACTTC	:::::::::0::12:12:15::24:24::39:::
946	TGTGCCAGCAGCCCCGGGCCGGCCTACGAGCAGTACTTC	TRBV7-3	TRBD1	TRBJ2-7	TRBV7	TRBJ2	CASSPGPAYEQYF	TGTGCCAGCAGCCCCGGGCCGGCCTACGAGCAGTACTTC	:::::::::0::12:12:15::18:22::39:::
947	TGTGCCAGCAGCCCCGGGGCAGGGCAGCCCCAGCATTTT	TRBV6-2	TRBD1	TRBJ1-5	TRBV6	TRBJ1	CASSPGAGQPQHF	TGTGCCAGCAGCCCCGGGGCAGGGCAGCCCCAGCATTTT	:::::::::0::11:12:15::24:24::39:::
948	TGTGCCAGCAGCCCCGGGGCAGGGGCCACCTACGAGCAGTACGTC	TRBV9	TRBD1	TRBJ2-7	TRBV9*00	TRBJ2	CASSPGAGATYEQYV	TGTGCCAGCAGCCCCGGGGCAGGGGCCACCTACGAGCAGTACGTC	:::::::::0::12:12:15::25:28::45:::
949	TGTGCCAGCAGCCCCGGGGCCGGAAACACCATATATTTT	TRBV6-1	TRBD1	TRBJ1-3	TRBV6	TRBJ1	CASSPGAGNTIYF	TGTGCCAGCAGCCCCGGGGCCGGAAACACCATATATTTT	:::::::::0::11:12:15::18:21::39:::
950	TGTGCCAGCAGCCCCGGGGCGGCCTACGAGCAGTACTTC	TRBV7-2	TRBD1	TRBJ2-7	TRBV7	TRBJ2	CASSPGAAYEQYF	TGTGCCAGCAGCCCCGGGGCGGCCTACGAGCAGTACTTC	:::::::::0::12:12:15::18:22::39:::
951	TGTGCCAGCAGCCCCGGGGCGGCCTATGAGCAGTACTTC	TRBV7-2	TRBD1	TRBJ2-7	TRBV7	TRBJ2	CASSPGAAYEQYF	TGTGCCAGCAGCCCCGGGGCGGCCTATGAGCAGTACTTC	:::::::::0::12:12:15::18:22::39:::
952	TGTGCCAGCAGCCCCGGTTGGGGAAACTATGGCTACACCTTC	TRBV28	TRBD1	TRBJ1-2	TRBV28*00	TRBJ1	CASSPGWGNYGYTF	TGTGCCAGCAGCCCCGGTTGGGGAAACTATGGCTACACCTTC	:::::::::0::11:12:15::17:24::42:::
953	TGTGCCAGCAGCCCCTCAGGAGCCTACGAGCAGTACTTC	TRBV11-2	TRBD2	TRBJ2-7	TRBV11	TRBJ2	CASSPSGAYEQYF	TGTGCCAGCAGCCCCTCAGGAGCCTACGAGCAGTACTTC	:::::::::0::12:12:::17:17:22:39:::
954	TGTGCCAGCAGCCCCTCAGGGGGTGCCTATGGCTACACCTTC	TRBV6-6	TRBD1	TRBJ1-2	TRBV6	TRBJ1	CASSPSGGAYGYTF	TGTGCCAGCAGCCCCTCAGGGGGTGCCTATGGCTACACCTTC	:::::::::0::11:16::24:26:26::42:::
955	TGTGCCAGCAGCCCGACAGCTAACAATGAGCAGTTCTTC	TRBV12-4	TRBD1	TRBJ2-1	TRBV12	TRBJ2	CASSPTANNEQFF	TGTGCCAGCAGCCCGACAGCTAACAATGAGCAGTTCTTC	:::::::::0::11:14:::19:22::39:::
956	TGTGCCAGCAGCCCGACCGGGACAGGCGCCTATGGCTACACCTTC	TRBV3-1	TRBD1	TRBJ1-2	TRBV3	TRBJ1	CASSPTGTGAYGYTF	TGTGCCAGCAGCCCGACCGGGACAGGCGCCTATGGCTACACCTTC	:::::::::0::13:16:18::26:29::45:::
957	TGTGCCAGCAGCCCGACTGCTAACAATGAGCAGTTCTTC	TRBV12-3		TRBJ2-1	TRBV12	TRBJ2	CASSPTANNEQFF	TGTGCCAGCAGCCCGACTGCTAACAATGAGCAGTTCTTC	:::::::::0::11:::::22::39:::
958	TGTGCCAGCAGCCCGCAGGGGGGCACTGAAGCTTTCTTT	TRBV3-1	TRBD1	TRBJ1-1	TRBV3	TRBJ1	CASSPQGGTEAFF	TGTGCCAGCAGCCCGCAGGGGGGCACTGAAGCTTTCTTT	:::::::::0::13:15:::22:23::39:::
959	TGTGCCAGCAGCCCGGAATCTAGCGGGGGGGACAATGAGCAGTTCTTC	TRBV4-2	TRBD2	TRBJ2-1	TRBV4	TRBJ2	CASSPESSGGDNEQFF	TGTGCCAGCAGCCCGGAATCTAGCGGGGGGGACAATGAGCAGTTCTTC	:::::::::0::13:19::31:31:31::48:::
960	TGTGCCAGCAGCCCGGCAGGGGGCTACGAGCAGTACGTC	TRBV11-2	TRBD1	TRBJ2-7	TRBV11	TRBJ2	CASSPAGGYEQYV	TGTGCCAGCAGCCCGGCAGGGGGCTACGAGCAGTACGTC	:::::::::0::12:16:::23:23::39:::
961	TGTGCCAGCAGCCCGGCGGGGGGGTACGAGCAGTACTTC	TRBV7-2	TRBD2	TRBJ2-7	TRBV7	TRBJ2	CASSPAGGYEQYF	TGTGCCAGCAGCCCGGCGGGGGGGTACGAGCAGTACTTC	:::::::::0::12:15::24:24:24::39:::
962	TGTGCCAGCAGCCCGGGACAGATTAATGAAAAACTGTTTTTT	TRBV3-1	TRBD1	TRBJ1-4	TRBV3	TRBJ1	CASSPGQINEKLFF	TGTGCCAGCAGCCCGGGACAGATTAATGAAAAACTGTTTTTT	:::::::::0::13:13:14::21:23::42:::
963	TGTGCCAGCAGCCCGGGACAGGGGGCCTACGAGCAGTACTTC	TRBV3-2	TRBD1	TRBJ2-7	TRBV3	TRBJ2	CASSPGQGAYEQYF	TGTGCCAGCAGCCCGGGACAGGGGGCCTACGAGCAGTACTTC	:::::::::0::13:13:14::25:25::42:::
964	TGTGCCAGCAGCCCGGGACAGGGGGTAGGACAGCCCCAGCATTTT	TRBV6-1	TRBD1	TRBJ1-5	TRBV6	TRBJ1	CASSPGQGVGQPQHF	TGTGCCAGCAGCCCGGGACAGGGGGTAGGACAGCCCCAGCATTTT	:::::::::0::11:11:14::25:30::45:::
965	TGTGCCAGCAGCCCGGGACTAGCATACGAGCAGTACTTC	TRBV7-8	TRBD2	TRBJ2-7	TRBV7	TRBJ2	CASSPGLAYEQYF	TGTGCCAGCAGCCCGGGACTAGCATACGAGCAGTACTTC	:::::::::0::12:12:14::23:24::39:::
966	TGTGCCAGCAGCCCGGGACTAGCGGGGGGGAATGAGCAGTTCTTC	TRBV5-6	TRBD2	TRBJ2-1	TRBV5	TRBJ2	CASSPGLAGGNEQFF	TGTGCCAGCAGCCCGGGACTAGCGGGGGGGAATGAGCAGTTCTTC	:::::::::0::12:12:14:30:30:30::45:::
967	TGTGCCAGCAGCCCGGGACTAGCGTACGAGCAGTACTTC	TRBV7-8	TRBD2	TRBJ2-7	TRBV7	TRBJ2	CASSPGLAYEQYF	TGTGCCAGCAGCCCGGGACTAGCGTACGAGCAGTACTTC	:::::::::0::12:12:14::24:24::39:::
968	TGTGCCAGCAGCCCGGGCGGGGTAGCCTACGAGCAGTACTTC	TRBV11-2	TRBD1	TRBJ2-7	TRBV11	TRBJ2	CASSPGGVAYEQYF	TGTGCCAGCAGCCCGGGCGGGGTAGCCTACGAGCAGTACTTC	:::::::::0::12:12:14::22:25::42:::
969	TGTGCCAGCAGCCCGGGGGGGGCCTACGAGCAGTACTTC	TRBV7-8	TRBD2	TRBJ2-7	TRBV7	TRBJ2	CASSPGGAYEQYF	TGTGCCAGCAGCCCGGGGGGGGCCTACGAGCAGTACTTC	:::::::::0::12:13::21:21:22::39:::
970	TGTGCCAGCAGCCCGTCGGGACAGGGACCCTACGAGCAGTACTTC	TRBV4-2	TRBD1	TRBJ2-7	TRBV4	TRBJ2	CASSPSGQGPYEQYF	TGTGCCAGCAGCCCGTCGGGACAGGGACCCTACGAGCAGTACTTC	:::::::::0::13:16:17::26:28::45:::
971	TGTGCCAGCAGCCCGTCGGGACAGGGGGCCTACGAGCAGTACTTC	TRBV6-1	TRBD1	TRBJ2-7	TRBV6	TRBJ2	CASSPSGQGAYEQYF	TGTGCCAGCAGCCCGTCGGGACAGGGGGCCTACGAGCAGTACTTC	:::::::::0::11:16:17::28:28::45:::
972	TGTGCCAGCAGCCCGTCTGGGGCCAACGTCCTGACTTTC	TRBV6-2		TRBJ2-6	TRBV6	TRBJ2	CASSPSGANVLTF	TGTGCCAGCAGCCCGTCTGGGGCCAACGTCCTGACTTTC	:::::::::0::11:::::15::39:::
973	TGTGCCAGCAGCCCGTCTGGGGCGAACGTCCTGACTTTC	TRBV6-2		TRBJ2-6	TRBV6	TRBJ2	CASSPSGANVLTF	TGTGCCAGCAGCCCGTCTGGGGCGAACGTCCTGACTTTC	:::::::::0::11:::::15::39:::
974	TGTGCCAGCAGCCCTACAGCGAACACTGAAGCTTTCTTT	TRBV11-2		TRBJ1-1	TRBV11	TRBJ1	CASSPTANTEAFF	TGTGCCAGCAGCCCTACAGCGAACACTGAAGCTTTCTTT	:::::::::0::12:::::20::39:::
975	TGTGCCAGCAGCCCTAGGGGGGCAGGTTCACCCCTCCACTTT	TRBV12-4	TRBD1	TRBJ1-6	TRBV12	TRBJ1	CASSPRGAGSPLHF	TGTGCCAGCAGCCCTAGGGGGGCAGGTTCACCCCTCCACTTT	:::::::::0::11:15:::21:26::42:::
976	TGTGCCAGCAGCCCTTGGACAGGGAACGGCTACACCTTC	TRBV6-1	TRBD1	TRBJ1-2	TRBV6	TRBJ1	CASSPWTGNGYTF	TGTGCCAGCAGCCCTTGGACAGGGAACGGCTACACCTTC	:::::::::0::11:16:::24:27::39:::
977	TGTGCCAGCAGCCCTTGGACAGGTAACGGCTACACCTTC	TRBV6-1	TRBD1	TRBJ1-2	TRBV6	TRBJ1	CASSPWTGNGYTF	TGTGCCAGCAGCCCTTGGACAGGTAACGGCTACACCTTC	:::::::::0::11:16:::23:27::39:::
978	TGTGCCAGCAGCCGAAGCACGGCGGGCAATCAGCCCCAGCATTTT	TRBV3-1		TRBJ1-5	TRBV3	TRBJ1	CASSRSTAGNQPQHF	TGTGCCAGCAGCCGAAGCACGGCGGGCAATCAGCCCCAGCATTTT	:::::::::0::17:::::25::45:::
979	TGTGCCAGCAGCCGAAGCGCAGCGGGGGCCACTAGCACAGATACGCAGTATTTT	TRBV3-1	TRBD1	TRBJ2-3	TRBV3	TRBJ2	CASSRSAAGATSTDTQYF	TGTGCCAGCAGCCGAAGCGCAGCGGGGGCCACTAGCACAGATACGCAGTATTTT	:::::::::0::17:23::29:29:31:33:54:::
980	TGTGCCAGCAGCCGAAGCGCAGCGGGGGGCACTAGCACAGATACGCAGTATTTT	TRBV3-1	TRBD2	TRBJ2-3	TRBV3	TRBJ2	CASSRSAAGGTSTDTQYF	TGTGCCAGCAGCCGAAGCGCAGCGGGGGGCACTAGCACAGATACGCAGTATTTT	:::::::::0::17:20::29:30:31:33:54:::
981	TGTGCCAGCAGCCGACAGGCCGCCTACGAGCAGTACTTC	TRBV3-1	TRBD1	TRBJ2-7	TRBV3	TRBJ2	CASSRQAAYEQYF	TGTGCCAGCAGCCGACAGGCCGCCTACGAGCAGTACTTC	:::::::::0::13:13:::19:22::39:::
982	TGTGCCAGCAGCCGACAGGGAGGGTACGAGCAGTACTTC	TRBV12-3	TRBD1	TRBJ2-7	TRBV12	TRBJ2	CASSRQGGYEQYF	TGTGCCAGCAGCCGACAGGGAGGGTACGAGCAGTACTTC	:::::::::0::11:13:::20:24::39:::
983	TGTGCCAGCAGCCGACAGGGGGCCAATGAGCAGTTCTTC	TRBV13	TRBD1	TRBJ2-1	TRBV13*00	TRBJ2	CASSRQGANEQFF	TGTGCCAGCAGCCGACAGGGGGCCAATGAGCAGTTCTTC	:::::::::0::12:13::23:23:23::39:::
984	TGTGCCAGCAGCCGAGGCCCGGGACAGGCCTACGAGCAGTACTTC	TRBV3-1	TRBD1	TRBJ2-7	TRBV3	TRBJ2	CASSRGPGQAYEQYF	TGTGCCAGCAGCCGAGGCCCGGGACAGGCCTACGAGCAGTACTTC	:::::::::0::16:17:20::28:28::45:::
985	TGTGCCAGCAGCCGAGGCCGGAACACTGAAGCTTTCTTT	TRBV13		TRBJ1-1	TRBV13*00	TRBJ1	CASSRGRNTEAFF	TGTGCCAGCAGCCGAGGCCGGAACACTGAAGCTTTCTTT	:::::::::0:17:19:::::20::39:::
986	TGTGCCAGCAGCCGCGCCTACGAGCAGTACTTC	TRBV12-3		TRBJ2-7	TRBV12	TRBJ2	CASSRAYEQYF	TGTGCCAGCAGCCGCGCCTACGAGCAGTACTTC	:::::::::0::11:::::13:14:33:::
987	TGTGCCAGCAGCCGCGGCCGGGCACCCTACAATGAGCAGTTCTTC	TRBV7-3	TRBD1	TRBJ2-1	TRBV7	TRBJ2	CASSRGRAPYNEQFF	TGTGCCAGCAGCCGCGGCCGGGCACCCTACAATGAGCAGTTCTTC	:::::::::0::12:17:19::22:25::45:::
988	TGTGCCAGCAGCCGGGGCCTCGCCTACGAGCAGTACTTC	TRBV3-1	TRBD2	TRBJ2-7	TRBV3	TRBJ2	CASSRGLAYEQYF	TGTGCCAGCAGCCGGGGCCTCGCCTACGAGCAGTACTTC	:::::::::0::13:13::16:21:22::39:::
989	TGTGCCAGCAGCCGGGGGGGGGCTGAAGCTTTCTTT	TRBV14	TRBD1	TRBJ1-1	TRBV14*00	TRBJ1	CASSRGGAEAFF	TGTGCCAGCAGCCGGGGGGGGGCTGAAGCTTTCTTT	:::::::::0::13:13:::18:22::36:::
990	TGTGCCAGCAGCCTAGGACAGAACCTCTATGGCTACACCTTC	TRBV5-4	TRBD1	TRBJ1-2	TRBV5	TRBJ1	CASSLGQNLYGYTF	TGTGCCAGCAGCCTAGGACAGAACCTCTATGGCTACACCTTC	:::::::::0::12:15:::21:26::42:::
991	TGTGCCAGCAGCCTAGGAGGGATCCCTGTCAATGAGCAGTTCTTC	TRBV9	TRBD1	TRBJ2-1	TRBV9*00	TRBJ2	CASSLGGIPVNEQFF	TGTGCCAGCAGCCTAGGAGGGATCCCTGTCAATGAGCAGTTCTTC	:::::::::0:16:16:23:::29:29::45:::
992	TGTGCCAGCAGCCTCAAACTCAACACTGAAGCTTTCTTT	TRBV7-6		TRBJ1-1	TRBV7	TRBJ1	CASSLKLNTEAFF	TGTGCCAGCAGCCTCAAACTCAACACTGAAGCTTTCTTT	:::::::::0::12:::::21::39:::
993	TGTGCCAGCAGCCTCCCTGACAGGGTCCCCGGGGAGCTGTTTTTT	TRBV12-4	TRBD1	TRBJ2-2	TRBV12	TRBJ2	CASSLPDRVPGELFF	TGTGCCAGCAGCCTCCCTGACAGGGTCCCCGGGGAGCTGTTTTTT	:::::::::0::11:18:::25:28::45:::
994	TGTGCCAGCAGCCTCGGACAGAGCACCAGCAATCAGCCCCAGCATTTT	TRBV3-1	TRBD1	TRBJ1-5	TRBV3	TRBJ1	CASSLGQSTSNQPQHF	TGTGCCAGCAGCCTCGGACAGAGCACCAGCAATCAGCCCCAGCATTTT	:::::::::0::13:15:::21:27::48:::
995	TGTGCCAGCAGCCTCGGGACTCCCTACAATGAGCAGTTCTTC	TRBV9		TRBJ2-1	TRBV9*00	TRBJ2	CASSLGTPYNEQFF	TGTGCCAGCAGCCTCGGGACTCCCTACAATGAGCAGTTCTTC	:::::::::0::12:::::16:19:42:::
996	TGTGCCAGCAGCCTCGGGGGAACCGGGGAGCTGTTTTTT	TRBV5-6	TRBD1	TRBJ2-2	TRBV5	TRBJ2	CASSLGGTGELFF	TGTGCCAGCAGCCTCGGGGGAACCGGGGAGCTGTTTTTT	:::::::::0::12:15:::20:21::39:::
997	TGTGCCAGCAGCCTCTGGCGGACGAACACTGAAGCTTTCTTT	TRBV13		TRBJ1-1	TRBV13*00	TRBJ1	CASSLWRTNTEAFF	TGTGCCAGCAGCCTCTGGCGGACGAACACTGAAGCTTTCTTT	:::::::::0::12:::::23::42:::
998	TGTGCCAGCAGCCTGGCCCCAGGGGAAGCTTTCTTT	TRBV5-6	TRBD1	TRBJ1-1	TRBV5	TRBJ1	CASSLAPGEAFF	TGTGCCAGCAGCCTGGCCCCAGGGGAAGCTTTCTTT	:::::::::0:16:18:19:::24:24::36:::
999	TGTGCCAGCAGCCTGGCTCCGGGCTCCTACGAGCAGTACTTC	TRBV9		TRBJ2-7	TRBV9*00	TRBJ2	CASSLAPGSYEQYF	TGTGCCAGCAGCCTGGCTCCGGGCTCCTACGAGCAGTACTTC	:::::::::0:16:21:::::22:23:42:::
1000	TGTGCCAGCAGCCTGGGACAGGCAAATTCACCCCTCCACTTT	TRBV4-2	TRBD1	TRBJ1-6	TRBV4	TRBJ1	CASSLGQANSPLHF	TGTGCCAGCAGCCTGGGACAGGCAAATTCACCCCTCCACTTT	:::::::::0::13:14:14::22:24::42:::
1001	TGTGCCAGCAGCCTGGGACAGGGAAATCAGCCCCAGCATTTT	TRBV5-5	TRBD1	TRBJ1-5	TRBV5	TRBJ1	CASSLGQGNQPQHF	TGTGCCAGCAGCCTGGGACAGGGAAATCAGCCCCAGCATTTT	:::::::::0:16:16:16:::23:24::42:::
1002	TGTGCCAGCAGCCTTGGGACGGAAACTAACTATGGCTACACCTTC	TRBV9	TRBD1	TRBJ1-2	TRBV9*00	TRBJ1	CASSLGTETNYGYTF	TGTGCCAGCAGCCTTGGGACGGAAACTAACTATGGCTACACCTTC	:::::::::0::12:15:15::20:25:25:45:::
1003	TGTGCCAGCAGCGAACTAGGAGGGGCCAACGTCCTGACTTTC	TRBV7-8	TRBD2	TRBJ2-6	TRBV7	TRBJ2	CASSELGGANVLTF	TGTGCCAGCAGCGAACTAGGAGGGGCCAACGTCCTGACTTTC	:::::::::0::12:14:::19:21::42:::
1004	TGTGCCAGCAGCGAAGCCGGGACAGGGTCCTACGAGCAGTACGTC	TRBV6-1	TRBD1	TRBJ2-7	TRBV6	TRBJ2	CASSEAGTGSYEQYV	TGTGCCAGCAGCGAAGCCGGGACAGGGTCCTACGAGCAGTACGTC	:::::::::0:17:17:17:18::27:27::45:::
1005	TGTGCCAGCAGCGAAGGACAGGGGTACACTGAAGCTTTCTTT	TRBV9	TRBD1	TRBJ1-1	TRBV9*00	TRBJ1	CASSEGQGYTEAFF	TGTGCCAGCAGCGAAGGACAGGGGTACACTGAAGCTTTCTTT	:::::::::0:16:16:16:::24:25::42:::
1006	TGTGCCAGCAGCGAAGGCGCCTATAATTCACCCCTCCACTTT	TRBV5-4		TRBJ1-6	TRBV5	TRBJ1	CASSEGAYNSPLHF	TGTGCCAGCAGCGAAGGCGCCTATAATTCACCCCTCCACTTT	:::::::::0::12:::::16:17:42:::
1007	TGTGCCAGCAGCGAAGGGGGCTCTTCTCAGGCTTTCTTT	TRBV6-1	TRBD1	TRBJ1-1	TRBV6	TRBJ1	CASSEGGSSQAFF	TGTGCCAGCAGCGAAGGGGGCTCTTCTCAGGCTTTCTTT	:::::::::0::16:16::21:21:30::39:::
1008	TGTGCCAGCAGCGACGGACAGGCCTATGGCTACACCTTC	TRBV6-2	TRBD1	TRBJ1-2	TRBV6	TRBJ1	CASSDGQAYGYTF	TGTGCCAGCAGCGACGGACAGGCCTATGGCTACACCTTC	:::::::::0::11:15:::22:23::39:::
1009	TGTGCCAGCAGCGACGGACAGGCCTTCAATGAGCAGTTCTTC	TRBV9	TRBD1	TRBJ2-1	TRBV9*00	TRBJ2	CASSDGQAFNEQFF	TGTGCCAGCAGCGACGGACAGGCCTTCAATGAGCAGTTCTTC	:::::::::0::13:15:::22:22::42:::
1010	TGTGCCAGCAGCGACGGGGTTTCTGGGGCCAACGTCCTGACTTTC	TRBV9		TRBJ2-6	TRBV9*00	TRBJ2	CASSDGVSGANVLTF	TGTGCCAGCAGCGACGGGGTTTCTGGGGCCAACGTCCTGACTTTC	:::::::::0::13:::::21::45:::
1011	TGTGCCAGCAGCGACTACAATGAGCAGTTCTTC	TRBV9		TRBJ2-1	TRBV9*00	TRBJ2	CASSDYNEQFF	TGTGCCAGCAGCGACTACAATGAGCAGTTCTTC	:::::::::0:14:18:::::14::33:::
1012	TGTGCCAGCAGCGACTCCAATGAGCAGTTCTTC	TRBV9		TRBJ2-1	TRBV9*00	TRBJ2	CASSDSNEQFF	TGTGCCAGCAGCGACTCCAATGAGCAGTTCTTC	:::::::::0::13:::::14::33:::
1013	TGTGCCAGCAGCGACTGGTCTTCCGGGGGACAGCCCCAGCATTTT	TRBV6-1	TRBD1	TRBJ1-5	TRBV6	TRBJ1	CASSDWSSGGQPQHF	TGTGCCAGCAGCGACTGGTCTTCCGGGGGACAGCCCCAGCATTTT	:::::::::0::14:22:24::27:30::45:::
1014	TGTGCCAGCAGCGAGCCGGGACACCACGAGCAGTACTTC	TRBV6-1	TRBD1	TRBJ2-7	TRBV6	TRBJ2	CASSEPGHHEQYF	TGTGCCAGCAGCGAGCCGGGACACCACGAGCAGTACTTC	:::::::::0::14:15:17::23:25::39:::
1015	TGTGCCAGCAGCGAGGGACCTAACTACACTGAAGCTTTCTTT	TRBV9	TRBD2	TRBJ1-1	TRBV9*00	TRBJ1	CASSEGPNYTEAFF	TGTGCCAGCAGCGAGGGACCTAACTACACTGAAGCTTTCTTT	:::::::::0::13:13::17:21:25::42:::
1016	TGTGCCAGCAGCGAGGGAGGGGCCCCCTACAATGAGCAGTTCTTC	TRBV9	TRBD2	TRBJ2-1	TRBV9*00	TRBJ2	CASSEGGAPYNEQFF	TGTGCCAGCAGCGAGGGAGGGGCCCCCTACAATGAGCAGTTCTTC	:::::::::0::13:14::22:25:25::45:::
1017	TGTGCCAGCAGCGAGGGGGGGGTCCCCTACAATGAGCAGTTCTTC	TRBV9	TRBD1	TRBJ2-1	TRBV9*00	TRBJ2	CASSEGGVPYNEQFF	TGTGCCAGCAGCGAGGGGGGGGTCCCCTACAATGAGCAGTTCTTC	:::::::::0::13:13:::19:25::45:::
1018	TGTGCCAGCAGCGAGGGTTCCCCCTACAATGAGCAGTTCTTC	TRBV9		TRBJ2-1	TRBV9*00	TRBJ2	CASSEGSPYNEQFF	TGTGCCAGCAGCGAGGGTTCCCCCTACAATGAGCAGTTCTTC	:::::::::0::13:::::22::42:::
1019	TGTGCCAGCAGCGAGTCCGGGACAGGGTATGAGCAGTTCTTC	TRBV9	TRBD1	TRBJ2-1	TRBV9*00	TRBJ2	CASSESGTGYEQFF	TGTGCCAGCAGCGAGTCCGGGACAGGGTATGAGCAGTTCTTC	:::::::::0::13:16:18::27:28::42:::
1020	TGTGCCAGCAGCGATACGACAGGAGCCTACGAGCAGTACTTC	TRBV9		TRBJ2-7	TRBV9*00	TRBJ2	CASSDTTGAYEQYF	TGTGCCAGCAGCGATACGACAGGAGCCTACGAGCAGTACTTC	:::::::::0::13:::::20:25:42:::
1021	TGTGCCAGCAGCGATCCGGGACAACCCAACAATGAGCAGTTCTTC	TRBV4-2	TRBD1	TRBJ2-1	TRBV4	TRBJ2	CASSDPGQPNNEQFF	TGTGCCAGCAGCGATCCGGGACAACCCAACAATGAGCAGTTCTTC	:::::::::0::12:15:17::23:25::45:::
1022	TGTGCCAGCAGCGATGGGACAGGGTACAATGAGCAGTTCTTC	TRBV9	TRBD1	TRBJ2-1	TRBV9*00	TRBJ2	CASSDGTGYNEQFF	TGTGCCAGCAGCGATGGGACAGGGTACAATGAGCAGTTCTTC	:::::::::0::13:15:15::24:24::42:::
1023	TGTGCCAGCAGCGCAAACCCCCGTGGAGCGGGGGGCGGGGACGGGGAGCTGTTTTTT	TRBV7-3	TRBD1	TRBJ2-2	TRBV7	TRBJ2	CASSANPRGAGGGDGELFF	TGTGCCAGCAGCGCAAACCCCCGTGGAGCGGGGGGCGGGGACGGGGAGCTGTTTTTT	:::::::::0::12:19:22:36:37:41::57:::
1024	TGTGCCAGCAGCGCAGCCGGGAATCAGCCCCAGCATTTT	TRBV11-2	TRBD1	TRBJ1-5	TRBV11	TRBJ1	CASSAAGNQPQHF	TGTGCCAGCAGCGCAGCCGGGAATCAGCCCCAGCATTTT	:::::::::0::12:16:18::21:21::39:::
1025	TGTGCCAGCAGCGCAGGACTAGCGGGGGCAGATACGCAGTATTTT	TRBV9	TRBD2	TRBJ2-3	TRBV9*00	TRBJ2	CASSAGLAGADTQYF	TGTGCCAGCAGCGCAGGACTAGCGGGGGCAGATACGCAGTATTTT	:::::::::0:16:16:16:::26:28::45:::
1026	TGTGCCAGCAGCGCAGGGGGGAACACTGAAGCTTTCTTT	TRBV9		TRBJ1-1	TRBV9*00	TRBJ1	CASSAGGNTEAFF	TGTGCCAGCAGCGCAGGGGGGAACACTGAAGCTTTCTTT	:::::::::0:16:16:::::20::39:::
1027	TGTGCCAGCAGCGCCGACAGGGTGATCACCGGGGAGCTGTTTTTT	TRBV9	TRBD1	TRBJ2-2	TRBV9*00	TRBJ2	CASSADRVITGELFF	TGTGCCAGCAGCGCCGACAGGGTGATCACCGGGGAGCTGTTTTTT	:::::::::0::13:15:::22:23::45:::
1028	TGTGCCAGCAGCGCCGGGACAGGGTACACTGAAGCTTTCTTT	TRBV9	TRBD1	TRBJ1-1	TRBV9*00	TRBJ1	CASSAGTGYTEAFF	TGTGCCAGCAGCGCCGGGACAGGGTACACTGAAGCTTTCTTT	:::::::::0::13:13:15::24:25::42:::
1029	TGTGCCAGCAGCGCCGGGACCCCCTACAATGAGCAGTTCTTC	TRBV9		TRBJ2-1	TRBV9*00	TRBJ2	CASSAGTPYNEQFF	TGTGCCAGCAGCGCCGGGACCCCCTACAATGAGCAGTTCTTC	:::::::::0::13:::::16:20:42:::
1030	TGTGCCAGCAGCGCCGGGGGGGTCGGATACAATGAGCAGTTCTTC	TRBV9	TRBD2	TRBJ2-1	TRBV9*00	TRBJ2	CASSAGGVGYNEQFF	TGTGCCAGCAGCGCCGGGGGGGTCGGATACAATGAGCAGTTCTTC	:::::::::0::13:14::22:22:27::45:::
1031	TGTGCCAGCAGCGCCTCTGAATCTAACGAGCAGTACTTC	TRBV9		TRBJ2-7	TRBV9*00	TRBJ2	CASSASESNEQYF	TGTGCCAGCAGCGCCTCTGAATCTAACGAGCAGTACTTC	:::::::::0::13:::::25::39:::
1032	TGTGCCAGCAGCGCCTCTGAATCTTACGAGCAGTACTTC	TRBV9		TRBJ2-7	TRBV9*00	TRBJ2	CASSASESYEQYF	TGTGCCAGCAGCGCCTCTGAATCTTACGAGCAGTACTTC	:::::::::0::13:::::21::39:::
1033	TGTGCCAGCAGCGCGAAGACTAGCGGGGCGGATACGCAGTATTTT	TRBV7-3	TRBD2	TRBJ2-3	TRBV7	TRBJ2	CASSAKTSGADTQYF	TGTGCCAGCAGCGCGAAGACTAGCGGGGCGGATACGCAGTATTTT	:::::::::0::12:17:::27:30::45:::
1034	TGTGCCAGCAGCGCGACCGGGACAGGGTATGAAAAACTGTTTTTT	TRBV9	TRBD1	TRBJ1-4	TRBV9*00	TRBJ1	CASSATGTGYEKLFF	TGTGCCAGCAGCGCGACCGGGACAGGGTATGAAAAACTGTTTTTT	:::::::::0::13:16:18::27:28::45:::
1035	TGTGCCAGCAGCGCGGACAGCAGCGGAGTCTACGAGCAGTACTTC	TRBV9	TRBD1	TRBJ2-7	TRBV9*00	TRBJ2	CASSADSSGVYEQYF	TGTGCCAGCAGCGCGGACAGCAGCGGAGTCTACGAGCAGTACTTC	:::::::::0::13:14:::20:24:28:45:::
1036	TGTGCCAGCAGCGCGGCGGGGGAGGCCTACGAGCAGTACTTC	TRBV9	TRBD2	TRBJ2-7	TRBV9*00	TRBJ2	CASSAAGEAYEQYF	TGTGCCAGCAGCGCGGCGGGGGAGGCCTACGAGCAGTACTTC	:::::::::0::13:19:::25:25::42:::
1037	TGTGCCAGCAGCGCGGCGGGGGAGGCCTACGAGCGGTACTTC	TRBV9	TRBD2	TRBJ2-7	TRBV9*00	TRBJ2	CASSAAGEAYERYF	TGTGCCAGCAGCGCGGCGGGGGAGGCCTACGAGCGGTACTTC	:::::::::0::13:19:::25:25::42:::
1038	TGTGCCAGCAGCGCGGCTAGCGGGGGGGCCTACGAGCAGTACTTC	TRBV9	TRBD2	TRBJ2-7	TRBV9*00	TRBJ2	CASSAASGGAYEQYF	TGTGCCAGCAGCGCGGCTAGCGGGGGGGCCTACGAGCAGTACTTC	:::::::::0:16:19:19::28:28:28::45:::
1039	TGTGCCAGCAGCGCGGCTCCCGGGACGGGTTCCTACGAGCAGTACTTC	TRBV9	TRBD1	TRBJ2-7	TRBV9*00	TRBJ2	CASSAAPGTGSYEQYF	TGTGCCAGCAGCGCGGCTCCCGGGACGGGTTCCTACGAGCAGTACTTC	:::::::::0::13:17:21::29:30::48:::
1040	TGTGCCAGCAGCGCGGGGGGGCCGGTCACCGGGGAGCTGTTTTTT	TRBV9	TRBD2	TRBJ2-2	TRBV9*00	TRBJ2	CASSAGGPVTGELFF	TGTGCCAGCAGCGCGGGGGGGCCGGTCACCGGGGAGCTGTTTTTT	:::::::::0::13:13::21:23:26::45:::
1041	TGTGCCAGCAGCGCGGGTCAGAACGCAGACGAGCAGTATTTT	TRBV6-1	TRBD1	TRBJ2-7	TRBV6	TRBJ2	CASSAGQNADEQYF	TGTGCCAGCAGCGCGGGTCAGAACGCAGACGAGCAGTATTTT	:::::::::0::11:13:14::21:28::42:::
1042	TGTGCCAGCAGCGCTGCGGGGGAATCCTACGAGCAGTACTTC	TRBV9	TRBD1	TRBJ2-7	TRBV9*00	TRBJ2	CASSAAGESYEQYF	TGTGCCAGCAGCGCTGCGGGGGAATCCTACGAGCAGTACTTC	:::::::::0::13:17:::22:24::42:::
1043	TGTGCCAGCAGCGCTGGAGGTGAGGCCTACGAGCAGTACTTC	TRBV9	TRBD2	TRBJ2-7	TRBV9*00	TRBJ2	CASSAGGEAYEQYF	TGTGCCAGCAGCGCTGGAGGTGAGGCCTACGAGCAGTACTTC	:::::::::0::13:15:::20:25::42:::
1044	TGTGCCAGCAGCGGACAGGAGTCCTACGAGCAGTACTTC	TRBV6-4		TRBJ2-7	TRBV6	TRBJ2	CASSGQESYEQYF	TGTGCCAGCAGCGGACAGGAGTCCTACGAGCAGTACTTC	:::::::::0:18:23:::::16:21:39:::
1045	TGTGCCAGCAGCGGACAGGGGGCGTACGAGCAGTACTTC	TRBV6-1	TRBD1	TRBJ2-7	TRBV6	TRBJ2	CASSGQGAYEQYF	TGTGCCAGCAGCGGACAGGGGGCGTACGAGCAGTACTTC	:::::::::0::11:12::23:24:24::39:::
1046	TGTGCCAGCAGCGGAGGGGGCGGGGGGGCCTACGAGCAGTACTTC	TRBV6-1	TRBD1	TRBJ2-7	TRBV6	TRBJ2	CASSGGGGGAYEQYF	TGTGCCAGCAGCGGAGGGGGCGGGGGGGCCTACGAGCAGTACTTC	:::::::::0::11:14::21:22:28::45:::
1047	TGTGCCAGCAGCGGCCGGACTAGCGGGGATGAGCAGTTCTTC	TRBV9	TRBD2	TRBJ2-1	TRBV9*00	TRBJ2	CASSGRTSGDEQFF	TGTGCCAGCAGCGGCCGGACTAGCGGGGATGAGCAGTTCTTC	:::::::::0::13:16:::27:28::42:::
1048	TGTGCCAGCAGCGGCCTGAGAGGGCCCAATGAGCAGTTCTTC	TRBV9	TRBD2	TRBJ2-1	TRBV9*00	TRBJ2	CASSGLRGPNEQFF	TGTGCCAGCAGCGGCCTGAGAGGGCCCAATGAGCAGTTCTTC	:::::::::0::13:19::24:26:26::42:::
1049	TGTGCCAGCAGCGGCGGGACTAGCGGATACGAGCAGTACTTC	TRBV11-2	TRBD2	TRBJ2-7	TRBV11	TRBJ2	CASSGGTSGYEQYF	TGTGCCAGCAGCGGCGGGACTAGCGGATACGAGCAGTACTTC	:::::::::0::12:14:15::26:27::42:::
1050	TGTGCCAGCAGCGGCGGGGGACAGGGCTACAATGAGCAGTTCTTC	TRBV9	TRBD1	TRBJ2-1	TRBV9*00	TRBJ2	CASSGGGQGYNEQFF	TGTGCCAGCAGCGGCGGGGGACAGGGCTACAATGAGCAGTTCTTC	:::::::::0::13:17:17::26:26::45:::
1051	TGTGCCAGCAGCGGGACGGCAGCCTACGAGCAGTACTTC	TRBV6-1	TRBD2	TRBJ2-7	TRBV6	TRBJ2	CASSGTAAYEQYF	TGTGCCAGCAGCGGGACGGCAGCCTACGAGCAGTACTTC	:::::::::0::11:11::19:20:22::39:::
1052	TGTGCCAGCAGCGGGGCCGGTGGCTACGAGCAGTACGTC	TRBV11-1	TRBD1	TRBJ2-7	TRBV11	TRBJ2	CASSGAGGYEQYV	TGTGCCAGCAGCGGGGCCGGTGGCTACGAGCAGTACGTC	:::::::::0::12:12::17:17:23::39:::
1053	TGTGCCAGCAGCGGGGGAGGGGTCCCCTACAATGAGCAGTTCTTC	TRBV9	TRBD2	TRBJ2-1	TRBV9*00	TRBJ2	CASSGGGVPYNEQFF	TGTGCCAGCAGCGGGGGAGGGGTCCCCTACAATGAGCAGTTCTTC	:::::::::0::13:14::21:21:25::45:::
1054	TGTGCCAGCAGCGGGGGATCGGGCAATGAGCAGTTCTTC	TRBV9		TRBJ2-1	TRBV9*00	TRBJ2	CASSGGSGNEQFF	TGTGCCAGCAGCGGGGGATCGGGCAATGAGCAGTTCTTC	:::::::::0::13:::::23::39:::
1055	TGTGCCAGCAGCGGGGGCGTCTCCTACAATGAGCAGTTCTTC	TRBV9	TRBD1	TRBJ2-1	TRBV9*00	TRBJ2	CASSGGVSYNEQFF	TGTGCCAGCAGCGGGGGCGTCTCCTACAATGAGCAGTTCTTC	:::::::::0::13:13::18:19:20:20:42:::
1056	TGTGCCAGCAGCGGGGGGGCCCCTTACAATGAGCAGTTCTTC	TRBV9	TRBD1	TRBJ2-1	TRBV9*00	TRBJ2	CASSGGAPYNEQFF	TGTGCCAGCAGCGGGGGGGCCCCTTACAATGAGCAGTTCTTC	:::::::::0::13:13::18:23:24::42:::
1057	TGTGCCAGCAGCGGGGGGGGGGTACCCTACAATGAGCAGTTCTTC	TRBV9	TRBD1	TRBJ2-1	TRBV9*00	TRBJ2	CASSGGGVPYNEQFF	TGTGCCAGCAGCGGGGGGGGGGTACCCTACAATGAGCAGTTCTTC	:::::::::0::13:13:::18:25::45:::
1058	TGTGCCAGCAGCGGGGGTGGGGTACCCTACAATGAGCAGTTCTTC	TRBV9		TRBJ2-1	TRBV9*00	TRBJ2	CASSGGGVPYNEQFF	TGTGCCAGCAGCGGGGGTGGGGTACCCTACAATGAGCAGTTCTTC	:::::::::0::13:::::25::45:::
1059	TGTGCCAGCAGCGGGGTCGTCTCCTACAATGAGCAGTTCTTC	TRBV9		TRBJ2-1	TRBV9*00	TRBJ2	CASSGVVSYNEQFF	TGTGCCAGCAGCGGGGTCGTCTCCTACAATGAGCAGTTCTTC	:::::::::0::13:::::20:20:42:::
1060	TGTGCCAGCAGCGGTGGAATGGATACGCAGTATTTT	TRBV9		TRBJ2-3	TRBV9*00	TRBJ2	CASSGGMDTQYF	TGTGCCAGCAGCGGTGGAATGGATACGCAGTATTTT	:::::::::0::13:::::21::36:::
1061	TGTGCCAGCAGCGTAACAGGGGCCGACGAGCAGTACTTC	TRBV11-1	TRBD1	TRBJ2-7	TRBV11	TRBJ2	CASSVTGADEQYF	TGTGCCAGCAGCGTAACAGGGGCCGACGAGCAGTACTTC	:::::::::0::15:15:::22:22::39:::
1062	TGTGCCAGCAGCGTAACCGGGACAGGGGGCTCGCCCCTCCACTTT	TRBV9	TRBD1	TRBJ1-6	TRBV9*00	TRBJ1	CASSVTGTGGSPLHF	TGTGCCAGCAGCGTAACCGGGACAGGGGGCTCGCCCCTCCACTTT	:::::::::0::15:16:18:30:30:30::45:::
1063	TGTGCCAGCAGCGTAAGCGGCAGTGCCTACGAGCAGTACTTC	TRBV9	TRBD2	TRBJ2-7	TRBV9*00	TRBJ2	CASSVSGSAYEQYF	TGTGCCAGCAGCGTAAGCGGCAGTGCCTACGAGCAGTACTTC	:::::::::0::15:15:::23:25::42:::
1064	TGTGCCAGCAGCGTAAGTCAGGGAGTATTAGATACGCAGTATTTT	TRBV9	TRBD1	TRBJ2-3	TRBV9*00	TRBJ2	CASSVSQGVLDTQYF	TGTGCCAGCAGCGTAAGTCAGGGAGTATTAGATACGCAGTATTTT	:::::::::0::15:18:::23:29::45:::
1065	TGTGCCAGCAGCGTACTAGCGGGGGGACTCTACGAGCAGTACTTC	TRBV12-3	TRBD2	TRBJ2-7	TRBV12	TRBJ2	CASSVLAGGLYEQYF	TGTGCCAGCAGCGTACTAGCGGGGGGACTCTACGAGCAGTACTTC	:::::::::0::11:14:::23:24:27:45:::
1066	TGTGCCAGCAGCGTAGAACAGGGTGGCTACGAGCAGTACTTC	TRBV9	TRBD1	TRBJ2-7	TRBV9*00	TRBJ2	CASSVEQGGYEQYF	TGTGCCAGCAGCGTAGAACAGGGTGGCTACGAGCAGTACTTC	:::::::::0:16:16:17:::23:26::42:::
1067	TGTGCCAGCAGCGTAGACCAAAGCACCGAAGCTTTCTTT	TRBV9		TRBJ1-1	TRBV9*00	TRBJ1	CASSVDQSTEAFF	TGTGCCAGCAGCGTAGACCAAAGCACCGAAGCTTTCTTT	:::::::::0:16:16:::::23::39:::
1068	TGTGCCAGCAGCGTAGACCAAAGCACTGAAGCTTTCTTT	TRBV9		TRBJ1-1	TRBV9*00	TRBJ1	CASSVDQSTEAFF	TGTGCCAGCAGCGTAGACCAAAGCACTGAAGCTTTCTTT	:::::::::0:16:16:::::23::39:::
1069	TGTGCCAGCAGCGTAGACGGGAGCTCCTACAATGAGCAGTTCTTC	TRBV9		TRBJ2-1	TRBV9*00	TRBJ2	CASSVDGSSYNEQFF	TGTGCCAGCAGCGTAGACGGGAGCTCCTACAATGAGCAGTTCTTC	:::::::::0:16:16:::::19:23:45:::
1070	TGTGCCAGCAGCGTAGAGCAGGGGCCGTCTGGGGCCAACGTCCTGACTTTC	TRBV9	TRBD1	TRBJ2-6	TRBV9*00	TRBJ2	CASSVEQGPSGANVLTF	TGTGCCAGCAGCGTAGAGCAGGGGCCGTCTGGGGCCAACGTCCTGACTTTC	:::::::::0:16:16:18::26:27:27::51:::
1071	TGTGCCAGCAGCGTAGAGGGCAGGGCGGCAGAGACCCAGTACTTC	TRBV9	TRBD1	TRBJ2-5	TRBV9*00	TRBJ2	CASSVEGRAAETQYF	TGTGCCAGCAGCGTAGAGGGCAGGGCGGCAGAGACCCAGTACTTC	:::::::::0:16:16:17:17:29:29:29::45:::
1072	TGTGCCAGCAGCGTAGAGGGGAGGGGGCCTGAGACCCAGTACTTC	TRBV9	TRBD1	TRBJ2-5	TRBV9*00	TRBJ2	CASSVEGRGPETQYF	TGTGCCAGCAGCGTAGAGGGGAGGGGGCCTGAGACCCAGTACTTC	:::::::::0:16:16:21::28:28:30::45:::
1073	TGTGCCAGCAGCGTAGATAGCGGGGGGGCCTATGAGCAGTTCTTC	TRBV9	TRBD2	TRBJ2-1	TRBV9*00	TRBJ2	CASSVDSGGAYEQFF	TGTGCCAGCAGCGTAGATAGCGGGGGGGCCTATGAGCAGTTCTTC	:::::::::0:16:19:19::28:30:31::45:::
1074	TGTGCCAGCAGCGTAGATGGTACGGGCCGTCCAGAGACCCAGTACTTC	TRBV9	TRBD2	TRBJ2-5	TRBV9*00	TRBJ2	CASSVDGTGRPETQYF	TGTGCCAGCAGCGTAGATGGTACGGGCCGTCCAGAGACCCAGTACTTC	:::::::::0:16:16:23::26:32:32::48:::
1075	TGTGCCAGCAGCGTAGCGGGGGGGTCGGCCTATGGCTACACCTTC	TRBV9	TRBD1	TRBJ1-2	TRBV9*00	TRBJ1	CASSVAGGSAYGYTF	TGTGCCAGCAGCGTAGCGGGGGGGTCGGCCTATGGCTACACCTTC	:::::::::0:16:17:17:::22:29::45:::
1076	TGTGCCAGCAGCGTAGCTGGGGGCGCCTACGAGCAGTACTTC	TRBV9		TRBJ2-7	TRBV9*00	TRBJ2	CASSVAGGAYEQYF	TGTGCCAGCAGCGTAGCTGGGGGCGCCTACGAGCAGTACTTC	:::::::::0:16:18:::::19:23:42:::
1077	TGTGCCAGCAGCGTAGCTGGGGTCCCGGCCAATGAGCAGTTCTTC	TRBV9	TRBD1	TRBJ2-1	TRBV9*00	TRBJ2	CASSVAGVPANEQFF	TGTGCCAGCAGCGTAGCTGGGGTCCCGGCCAATGAGCAGTTCTTC	:::::::::0:16:18:21:26::28:29::45:::
1078	TGTGCCAGCAGCGTAGCTGGGGTGCCCGCAGATACGCAGTATTTT	TRBV9	TRBD1	TRBJ2-3	TRBV9*00	TRBJ2	CASSVAGVPADTQYF	TGTGCCAGCAGCGTAGCTGGGGTGCCCGCAGATACGCAGTATTTT	:::::::::0:16:18:18::23:27:28::45:::
1079	TGTGCCAGCAGCGTAGGAGGGACGGCCTTAACAGAAGCTTTCTTT	TRBV9	TRBD2	TRBJ1-1	TRBV9*00	TRBJ1	CASSVGGTALTEAFF	TGTGCCAGCAGCGTAGGAGGGACGGCCTTAACAGAAGCTTTCTTT	:::::::::0:16:16:18::25:27:30::45:::
1080	TGTGCCAGCAGCGTAGGAGGGGCAGGCTACAATGAGCAGTTCTTC	TRBV9	TRBD1	TRBJ2-1	TRBV9*00	TRBJ2	CASSVGGAGYNEQFF	TGTGCCAGCAGCGTAGGAGGGGCAGGCTACAATGAGCAGTTCTTC	:::::::::0:16:16:18:18::26:26::45:::
1081	TGTGCCAGCAGCGTAGGAGGGGGGACCTACGAGCAGTACTTC	TRBV9	TRBD1	TRBJ2-7	TRBV9*00	TRBJ2	CASSVGGGTYEQYF	TGTGCCAGCAGCGTAGGAGGGGGGACCTACGAGCAGTACTTC	:::::::::0:16:16:17:::23:25::42:::
1082	TGTGCCAGCAGCGTAGGAGGGGTTTCCTACAATGAGCAGTTCTTC	TRBV9	TRBD1	TRBJ2-1	TRBV9*00	TRBJ2	CASSVGGVSYNEQFF	TGTGCCAGCAGCGTAGGAGGGGTTTCCTACAATGAGCAGTTCTTC	:::::::::0:16:16:17:::22:24::45:::
1083	TGTGCCAGCAGCGTAGGATGGGCAGTCTACAATGAGCAGTTCTTC	TRBV9		TRBJ2-1	TRBV9*00	TRBJ2	CASSVGWAVYNEQFF	TGTGCCAGCAGCGTAGGATGGGCAGTCTACAATGAGCAGTTCTTC	:::::::::0:16:16:::::26::45:::
1084	TGTGCCAGCAGCGTAGGCCTGGAGGCCTACGAGCAGTACTTC	TRBV9	TRBD2	TRBJ2-7	TRBV9*00	TRBJ2	CASSVGLEAYEQYF	TGTGCCAGCAGCGTAGGCCTGGAGGCCTACGAGCAGTACTTC	:::::::::0:16:16:20:::25:25::42:::
1085	TGTGCCAGCAGCGTAGGCGGGACAAACTACAATGAGCAGTTCTTC	TRBV9	TRBD1	TRBJ2-1	TRBV9*00	TRBJ2	CASSVGGTNYNEQFF	TGTGCCAGCAGCGTAGGCGGGACAAACTACAATGAGCAGTTCTTC	:::::::::0:16:16:17:18::24:26::45:::
1086	TGTGCCAGCAGCGTAGGCGGGGTCCCCTACAATGAGCAGTTCTTC	TRBV9	TRBD2	TRBJ2-1	TRBV9*00	TRBJ2	CASSVGGVPYNEQFF	TGTGCCAGCAGCGTAGGCGGGGTCCCCTACAATGAGCAGTTCTTC	:::::::::0:16:16:16:::21:25::45:::
1087	TGTGCCAGCAGCGTAGGCGGGGTCTCCTACAATGAGCAGTTCTTC	TRBV9	TRBD2	TRBJ2-1	TRBV9*00	TRBJ2	CASSVGGVSYNEQFF	TGTGCCAGCAGCGTAGGCGGGGTCTCCTACAATGAGCAGTTCTTC	:::::::::0:16:16:16:::21:23:23:45:::
1088	TGTGCCAGCAGCGTAGGGCCAGGGTACACTGAAGCTTTCTTT	TRBV9	TRBD1	TRBJ1-1	TRBV9*00	TRBJ1	CASSVGPGYTEAFF	TGTGCCAGCAGCGTAGGGCCAGGGTACACTGAAGCTTTCTTT	:::::::::0:16:16:16:::24:25::42:::
1089	TGTGCCAGCAGCGTAGGGGCCACCGGGGAGCTGTTTTTT	TRBV9		TRBJ2-2	TRBV9*00	TRBJ2	CASSVGATGELFF	TGTGCCAGCAGCGTAGGGGCCACCGGGGAGCTGTTTTTT	:::::::::0:16:16:::::20::39:::
1090	TGTGCCAGCAGCGTAGGGGGAACCGTATACAATGAGCAGTTCTTC	TRBV9		TRBJ2-1	TRBV9*00	TRBJ2	CASSVGGTVYNEQFF	TGTGCCAGCAGCGTAGGGGGAACCGTATACAATGAGCAGTTCTTC	:::::::::0:16:16:::::27::45:::
1091	TGTGCCAGCAGCGTAGGGGGGACAGGCTACAATGAGCAGTTCTTC	TRBV9	TRBD1	TRBJ2-1	TRBV9*00	TRBJ2	CASSVGGTGYNEQFF	TGTGCCAGCAGCGTAGGGGGGACAGGCTACAATGAGCAGTTCTTC	:::::::::0:16:16:18:18::26:26::45:::
1092	TGTGCCAGCAGCGTAGGGGGGACAGGTTACAATGAGCAGTTCTTC	TRBV9	TRBD1	TRBJ2-1	TRBV9*00	TRBJ2	CASSVGGTGYNEQFF	TGTGCCAGCAGCGTAGGGGGGACAGGTTACAATGAGCAGTTCTTC	:::::::::0:16:16:18:18::26:27::45:::
1093	TGTGCCAGCAGCGTAGGGGGGGCGCCCTACAATGAGCAGTTCTTC	TRBV9	TRBD1	TRBJ2-1	TRBV9*00	TRBJ2	CASSVGGAPYNEQFF	TGTGCCAGCAGCGTAGGGGGGGCGCCCTACAATGAGCAGTTCTTC	:::::::::0:16:16:17::23:25:25::45:::
1094	TGTGCCAGCAGCGTAGGGGGGGCTGTCTACAATGAGCAGTTCTTC	TRBV9	TRBD1	TRBJ2-1	TRBV9*00	TRBJ2	CASSVGGAVYNEQFF	TGTGCCAGCAGCGTAGGGGGGGCTGTCTACAATGAGCAGTTCTTC	:::::::::0:16:16:17::23:23:26::45:::
1095	TGTGCCAGCAGCGTAGGGGGGGCTTCCTACAATGAGCAGTTCTTC	TRBV9	TRBD1	TRBJ2-1	TRBV9*00	TRBJ2	CASSVGGASYNEQFF	TGTGCCAGCAGCGTAGGGGGGGCTTCCTACAATGAGCAGTTCTTC	:::::::::0:16:16:17::23:23:24::45:::
1096	TGTGCCAGCAGCGTAGGGGGGGTAGGATACAATGAGCAGTTCTTC	TRBV9	TRBD1	TRBJ2-1	TRBV9*00	TRBJ2	CASSVGGVGYNEQFF	TGTGCCAGCAGCGTAGGGGGGGTAGGATACAATGAGCAGTTCTTC	:::::::::0:16:16:16:::21:27::45:::
1097	TGTGCCAGCAGCGTAGGGGGGGTCCCCTACAATGAGCAGTTCTTC	TRBV9	TRBD1	TRBJ2-1	TRBV9*00	TRBJ2	CASSVGGVPYNEQFF	TGTGCCAGCAGCGTAGGGGGGGTCCCCTACAATGAGCAGTTCTTC	:::::::::0:16:16:16:::21:25::45:::
1098	TGTGCCAGCAGCGTAGGGGGGGTCTCCTACAATGAGCAGTTCTTC	TRBV9	TRBD1	TRBJ2-1	TRBV9*00	TRBJ2	CASSVGGVSYNEQFF	TGTGCCAGCAGCGTAGGGGGGGTCTCCTACAATGAGCAGTTCTTC	:::::::::0:16:16:16:::21:23:23:45:::
1099	TGTGCCAGCAGCGTAGGGGGGGTTGGCTACAATGAGCAGTTCTTC	TRBV9	TRBD1	TRBJ2-1	TRBV9*00	TRBJ2	CASSVGGVGYNEQFF	TGTGCCAGCAGCGTAGGGGGGGTTGGCTACAATGAGCAGTTCTTC	:::::::::0:16:16:16:::21:26::45:::
1100	TGTGCCAGCAGCGTAGGGTCCCCCGTCTACGAGCAGTACTTC	TRBV9	TRBD1	TRBJ2-7	TRBV9*00	TRBJ2	CASSVGSPVYEQYF	TGTGCCAGCAGCGTAGGGTCCCCCGTCTACGAGCAGTACTTC	:::::::::0:16:16:19:::24:26::42:::
1101	TGTGCCAGCAGCGTAGGGTCCCCCTCCTACGAGCAGTACTTC	TRBV9	TRBD1	TRBJ2-7	TRBV9*00	TRBJ2	CASSVGSPSYEQYF	TGTGCCAGCAGCGTAGGGTCCCCCTCCTACGAGCAGTACTTC	:::::::::0:16:16:17:22::22:23:23:42:::
1102	TGTGCCAGCAGCGTAGGTCCAGGGTACACTGAAGCTTTCTTT	TRBV9	TRBD1	TRBJ1-1	TRBV9*00	TRBJ1	CASSVGPGYTEAFF	TGTGCCAGCAGCGTAGGTCCAGGGTACACTGAAGCTTTCTTT	:::::::::0:16:16:16:21::24:25::42:::
1103	TGTGCCAGCAGCGTAGGTGCAGGGGCAGCGAACACTGAAGCTTTCTTT	TRBV7-6	TRBD1	TRBJ1-1	TRBV7	TRBJ1	CASSVGAGAANTEAFF	TGTGCCAGCAGCGTAGGTGCAGGGGCAGCGAACACTGAAGCTTTCTTT	:::::::::0::16:19:::25:29::48:::
1104	TGTGCCAGCAGCGTAGGTGGGGATGCCTACGAGCAGTACTTC	TRBV9		TRBJ2-7	TRBV9*00	TRBJ2	CASSVGGDAYEQYF	TGTGCCAGCAGCGTAGGTGGGGATGCCTACGAGCAGTACTTC	:::::::::0:16:16:::::25::42:::
1105	TGTGCCAGCAGCGTAGGTGGGGCTAGCGGGGGACCTTACGAGCAGTACTTC	TRBV9	TRBD2	TRBJ2-7	TRBV9*00	TRBJ2	CASSVGGASGGPYEQYF	TGTGCCAGCAGCGTAGGTGGGGCTAGCGGGGGACCTTACGAGCAGTACTTC	:::::::::0:16:16:18:18::30:36::51:::
1106	TGTGCCAGCAGCGTAGTGGGCGTCCCCTACAATGAGCAGTTCTTC	TRBV9	TRBD1	TRBJ2-1	TRBV9*00	TRBJ2	CASSVVGVPYNEQFF	TGTGCCAGCAGCGTAGTGGGCGTCCCCTACAATGAGCAGTTCTTC	:::::::::0:16:16:17::21:25:25::45:::
1107	TGTGCCAGCAGCGTAGTTGCAGGGGATGGGGGTACGCAGTATTTT	TRBV9	TRBD1	TRBJ2-3	TRBV9*00	TRBJ2	CASSVVAGDGGTQYF	TGTGCCAGCAGCGTAGTTGCAGGGGATGGGGGTACGCAGTATTTT	:::::::::0:16:16:19:::25:32::45:::
1108	TGTGCCAGCAGCGTAGTTGCAGGGGCAGCGTTCACTGAAGCTTTCTTT	TRBV7-6	TRBD1	TRBJ1-1	TRBV7	TRBJ1	CASSVVAGAAFTEAFF	TGTGCCAGCAGCGTAGTTGCAGGGGCAGCGTTCACTGAAGCTTTCTTT	:::::::::0::16:19:::25:32::48:::
1109	TGTGCCAGCAGCGTATCCGGGGATTCCTACGAGCAGTACTTC	TRBV9	TRBD1	TRBJ2-7	TRBV9*00	TRBJ2	CASSVSGDSYEQYF	TGTGCCAGCAGCGTATCCGGGGATTCCTACGAGCAGTACTTC	:::::::::0::15:15:19::23:24::42:::
1110	TGTGCCAGCAGCGTCAAGGTGATCGGGGAGCTGTTTTTT	TRBV9		TRBJ2-2	TRBV9*00	TRBJ2	CASSVKVIGELFF	TGTGCCAGCAGCGTCAAGGTGATCGGGGAGCTGTTTTTT	:::::::::0::14:::::23::39:::
1111	TGTGCCAGCAGCGTCGGAGGGGTGGGATACAATGAGCAGTTCTTC	TRBV9	TRBD2	TRBJ2-1	TRBV9*00	TRBJ2	CASSVGGVGYNEQFF	TGTGCCAGCAGCGTCGGAGGGGTGGGATACAATGAGCAGTTCTTC	:::::::::0::14:15::21:21:27::45:::
1112	TGTGCCAGCAGCGTCGGGGGACAGGGCTACAATGAGCAGTTCTTC	TRBV9	TRBD1	TRBJ2-1	TRBV9*00	TRBJ2	CASSVGGQGYNEQFF	TGTGCCAGCAGCGTCGGGGGACAGGGCTACAATGAGCAGTTCTTC	:::::::::0::14:17:17::26:26::45:::
1113	TGTGCCAGCAGCGTCGGGGGGGCGCCCTACAATGAGCAGTTCTTC	TRBV9	TRBD1	TRBJ2-1	TRBV9*00	TRBJ2	CASSVGGAPYNEQFF	TGTGCCAGCAGCGTCGGGGGGGCGCCCTACAATGAGCAGTTCTTC	:::::::::0::14:17::23:25:25::45:::
1114	TGTGCCAGCAGCGTGGGACAGCCCTCCTACGAGCAGTACTTC	TRBV9	TRBD1	TRBJ2-7	TRBV9*00	TRBJ2	CASSVGQPSYEQYF	TGTGCCAGCAGCGTGGGACAGCCCTCCTACGAGCAGTACTTC	:::::::::0::14:14:14::21:23:23:42:::
1115	TGTGCCAGCAGCGTGGGCGGGGCCCCCTACAATCAGCAGTTCTTC	TRBV9	TRBD2	TRBJ2-1	TRBV9*00	TRBJ2	CASSVGGAPYNQQFF	TGTGCCAGCAGCGTGGGCGGGGCCCCCTACAATCAGCAGTTCTTC	:::::::::0::14:19::22:25:25::45:::
1116	TGTGCCAGCAGCGTGGGCGGGGCCCCCTACAATGAGCAGTTCTTC	TRBV9	TRBD2	TRBJ2-1	TRBV9*00	TRBJ2	CASSVGGAPYNEQFF	TGTGCCAGCAGCGTGGGCGGGGCCCCCTACAATGAGCAGTTCTTC	:::::::::0::14:19::22:25:25::45:::
1117	TGTGCCAGCAGCGTGGGGGGGACAGGGAATTCACCCCTCCACTTT	TRBV9	TRBD1	TRBJ1-6	TRBV9*00	TRBJ1	CASSVGGTGNSPLHF	TGTGCCAGCAGCGTGGGGGGGACAGGGAATTCACCCCTCCACTTT	:::::::::0::14:18:18::27:27::45:::
1118	TGTGCCAGCAGCGTGGGGGGGGCCCAATACAATGAGCAGTTCTTC	TRBV9	TRBD1	TRBJ2-1	TRBV9*00	TRBJ2	CASSVGGAQYNEQFF	TGTGCCAGCAGCGTGGGGGGGGCCCAATACAATGAGCAGTTCTTC	:::::::::0::14:15::21:25:27::45:::
1119	TGTGCCAGCAGCGTGGGGGGGGCCCCCTACAATGAGCAGTTCTTC	TRBV9	TRBD1	TRBJ2-1	TRBV9*00	TRBJ2	CASSVGGAPYNEQFF	TGTGCCAGCAGCGTGGGGGGGGCCCCCTACAATGAGCAGTTCTTC	:::::::::0::14:15::21:25:25::45:::
1120	TGTGCCAGCAGCGTGGGGGGGGCCTTCTACAATGAGCAGTTCTTC	TRBV9	TRBD1	TRBJ2-1	TRBV9*00	TRBJ2	CASSVGGAFYNEQFF	TGTGCCAGCAGCGTGGGGGGGGCCTTCTACAATGAGCAGTTCTTC	:::::::::0::14:17::23:23:23:23:45:::
1121	TGTGCCAGCAGCGTTGCTAGCGGGGGGGCCTACGAGCAGTACTTC	TRBV9	TRBD2	TRBJ2-7	TRBV9*00	TRBJ2	CASSVASGGAYEQYF	TGTGCCAGCAGCGTTGCTAGCGGGGGGGCCTACGAGCAGTACTTC	:::::::::0:16:19:19::28:28:28::45:::
1122	TGTGCCAGCAGCGTTGGCGGGGTGGGATACAATGAGCAGTTCTTC	TRBV9	TRBD2	TRBJ2-1	TRBV9*00	TRBJ2	CASSVGGVGYNEQFF	TGTGCCAGCAGCGTTGGCGGGGTGGGATACAATGAGCAGTTCTTC	:::::::::0::14:16:::21:27::45:::
1123	TGTGCCAGCAGCGTTGGGGGAGACGCCTACGAGCAGTACTTC	TRBV9		TRBJ2-7	TRBV9*00	TRBJ2	CASSVGGDAYEQYF	TGTGCCAGCAGCGTTGGGGGAGACGCCTACGAGCAGTACTTC	:::::::::0::14:::::18:23:42:::
1124	TGTGCCAGCAGCGTTGGGGGGACAGGGTACAATGAGCAGTTCTTC	TRBV9	TRBD1	TRBJ2-1	TRBV9*00	TRBJ2	CASSVGGTGYNEQFF	TGTGCCAGCAGCGTTGGGGGGACAGGGTACAATGAGCAGTTCTTC	:::::::::0::14:18:18::27:27::45:::
1125	TGTGCCAGCAGCGTTGGGGGGGTCCTCTACAATGAGCAGTTCTTC	TRBV9	TRBD2	TRBJ2-1	TRBV9*00	TRBJ2	CASSVGGVLYNEQFF	TGTGCCAGCAGCGTTGGGGGGGTCCTCTACAATGAGCAGTTCTTC	:::::::::0::14:15::22:26:26::45:::
1126	TGTGCCAGCAGCGTTGGGGTAGTCCCCTACAATGAGCAGTTCTTC	TRBV9	TRBD2	TRBJ2-1	TRBV9*00	TRBJ2	CASSVGVVPYNEQFF	TGTGCCAGCAGCGTTGGGGTAGTCCCCTACAATGAGCAGTTCTTC	:::::::::0::14:19:::25:25::45:::
1127	TGTGCCAGCAGCTATGGTTCGGGGAACACTGAAGCTTTCTTT	TRBV7-9		TRBJ1-1	TRBV7	TRBJ1	CASSYGSGNTEAFF	TGTGCCAGCAGCTATGGTTCGGGGAACACTGAAGCTTTCTTT	:::::::::0::13:::::23::42:::
1128	TGTGCCAGCAGCTCAGCCTCGGGGAACACTGAAGCTTTCTTT	TRBV2		TRBJ1-1	TRBV2*00	TRBJ1	CASSSASGNTEAFF	TGTGCCAGCAGCTCAGCCTCGGGGAACACTGAAGCTTTCTTT	:::::::::0::11:::::23::42:::
1129	TGTGCCAGCAGCTCCACCATACACAATCAGCCCCAGCATTTT	TRBV28		TRBJ1-5	TRBV28*00	TRBJ1	CASSSTIHNQPQHF	TGTGCCAGCAGCTCCACCATACACAATCAGCCCCAGCATTTT	:::::::::0::11:::::23::42:::
1130	TGTGCCAGCAGCTCCACTGTTGGGGAAAAACTGTTTTTT	TRBV13		TRBJ1-4	TRBV13*00	TRBJ1	CASSSTVGEKLFF	TGTGCCAGCAGCTCCACTGTTGGGGAAAAACTGTTTTTT	:::::::::0::13:::::24::39:::
1131	TGTGCCAGCAGCTCCGAGGGAACCTACAATGAGCAGTTCTTC	TRBV7-6	TRBD2	TRBJ2-1	TRBV7	TRBJ2	CASSSEGTYNEQFF	TGTGCCAGCAGCTCCGAGGGAACCTACAATGAGCAGTTCTTC	:::::::::0::13:15::20:20:22::42:::
1132	TGTGCCAGCAGCTCCGGGACAGGGTATTCACCCCTCCACTTT	TRBV9	TRBD1	TRBJ1-6	TRBV9*00	TRBJ1	CASSSGTGYSPLHF	TGTGCCAGCAGCTCCGGGACAGGGTATTCACCCCTCCACTTT	:::::::::0::12:13:15::24:25::42:::
1133	TGTGCCAGCAGCTCCGGGACAGGGTATTCACCCCTCCCCTTT	TRBV9	TRBD1	TRBJ1-6	TRBV9*00	TRBJ1	CASSSGTGYSPLPF	TGTGCCAGCAGCTCCGGGACAGGGTATTCACCCCTCCCCTTT	:::::::::0::12:13:15::24:25::42:::
1134	TGTGCCAGCAGCTCCGGGGCAGGGTATTCACCCCTCCACTTT	TRBV9	TRBD1	TRBJ1-6	TRBV9*00	TRBJ1	CASSSGAGYSPLHF	TGTGCCAGCAGCTCCGGGGCAGGGTATTCACCCCTCCACTTT	:::::::::0::12:13:15::24:25::42:::
1135	TGTGCCAGCAGCTCCGGGGGGGTTCCCTACAATGAGCAGTTCTTC	TRBV9	TRBD2	TRBJ2-1	TRBV9*00	TRBJ2	CASSSGGVPYNEQFF	TGTGCCAGCAGCTCCGGGGGGGTTCCCTACAATGAGCAGTTCTTC	:::::::::0::12:14::22:22:25::45:::
1136	TGTGCCAGCAGCTCCTACGGAAGAGGAGCTTTCTTT	TRBV28		TRBJ1-1	TRBV28*00	TRBJ1	CASSSYGRGAFF	TGTGCCAGCAGCTCCTACGGAAGAGGAGCTTTCTTT	:::::::::0::11:::::26::36:::
1137	TGTGCCAGCAGCTCCTACGGACCGATGGAGCAGTTCTTC	TRBV9		TRBJ2-1	TRBV9*00	TRBJ2	CASSSYGPMEQFF	TGTGCCAGCAGCTCCTACGGACCGATGGAGCAGTTCTTC	:::::::::0::12:::::27::39:::
1138	TGTGCCAGCAGCTCCTACGGCAGAGGAGCTTTCTTT	TRBV28		TRBJ1-1	TRBV28*00	TRBJ1	CASSSYGRGAFF	TGTGCCAGCAGCTCCTACGGCAGAGGAGCTTTCTTT	:::::::::0::11:::::26::36:::
1139	TGTGCCAGCAGCTCCTTGGGGGACCACGAGCAGTACGTC	TRBV13	TRBD1	TRBJ2-7	TRBV13*00	TRBJ2	CASSSLGDHEQYV	TGTGCCAGCAGCTCCTTGGGGGACCACGAGCAGTACGTC	:::::::::0::13:19:19::24:25::39:::
1140	TGTGCCAGCAGCTCGAGGAGGGCAACTAATGAAAAACTGTTTTTT	TRBV13	TRBD2	TRBJ1-4	TRBV13*00	TRBJ1	CASSSRRATNEKLFF	TGTGCCAGCAGCTCGAGGAGGGCAACTAATGAAAAACTGTTTTTT	:::::::::0::13:16:::21:21:22:45:::
1141	TGTGCCAGCAGCTCGATGAACGGGACTAGTTCTCCTCGCCGCACAGATACGCAGTATTTT	TRBV7-3	TRBD2	TRBJ2-3	TRBV7	TRBJ2	CASSSMNGTSSPRRTDTQYF	TGTGCCAGCAGCTCGATGAACGGGACTAGTTCTCCTCGCCGCACAGATACGCAGTATTTT	:::::::::0::13:20:21::29:40::60:::
1142	TGTGCCAGCAGCTCGGACAGGGGTGGAACAGATACGCAGTATTTT	TRBV12-3	TRBD1	TRBJ2-3	TRBV12	TRBJ2	CASSSDRGGTDTQYF	TGTGCCAGCAGCTCGGACAGGGGTGGAACAGATACGCAGTATTTT	:::::::::0::11:14:::23:27::45:::
1143	TGTGCCAGCAGCTCGGACAGGGGTGGAACAGATATGCAGTATTTT	TRBV12-3	TRBD1	TRBJ2-3	TRBV12	TRBJ2	CASSSDRGGTDMQYF	TGTGCCAGCAGCTCGGACAGGGGTGGAACAGATATGCAGTATTTT	:::::::::0::11:14:::23:27::45:::
1144	TGTGCCAGCAGCTCTCGGATAGAAGGCACTGAAGCTTTCTTT	TRBV7-8		TRBJ1-1	TRBV7	TRBJ1	CASSSRIEGTEAFF	TGTGCCAGCAGCTCTCGGATAGAAGGCACTGAAGCTTTCTTT	:::::::::0::13:::::26::42:::
1145	TGTGCCAGCAGCTCTGGGACTAGCGGGGGAGCCTACGAGCAGTACTTC	TRBV9	TRBD2	TRBJ2-7	TRBV9*00	TRBJ2	CASSSGTSGGAYEQYF	TGTGCCAGCAGCTCTGGGACTAGCGGGGGAGCCTACGAGCAGTACTTC	:::::::::0::12:15:15::27:31::48:::
1146	TGTGCCAGCAGCTGGGGGCCCTCCCACGAGCAGTACTTC	TRBV7-6	TRBD1	TRBJ2-7	TRBV7	TRBJ2	CASSWGPSHEQYF	TGTGCCAGCAGCTGGGGGCCCTCCCACGAGCAGTACTTC	:::::::::0::13:13::19:19:20:20:39:::
1147	TGTGCCAGCAGCTGGGGGCCCTCCTACGAGCAGTACTTC	TRBV7-6	TRBD1	TRBJ2-7	TRBV7	TRBJ2	CASSWGPSYEQYF	TGTGCCAGCAGCTGGGGGCCCTCCTACGAGCAGTACTTC	:::::::::0::13:13::19:19:20:20:39:::
1148	TGTGCCAGCAGCTTAACAAGAGGAGGAGGAGGCACCGGGGAGCTGTTTTTT	TRBV7-3	TRBD2	TRBJ2-2	TRBV7	TRBJ2	CASSLTRGGGGTGELFF	TGTGCCAGCAGCTTAACAAGAGGAGGAGGAGGCACCGGGGAGCTGTTTTTT	:::::::::0:17:17:21:::26:32::51:::
1149	TGTGCCAGCAGCTTAACTGGGCAGGGTAAGTACTTC	TRBV7-2	TRBD1	TRBJ2-1	TRBV7	TRBJ2	CASSLTGQGKYF	TGTGCCAGCAGCTTAACTGGGCAGGGTAAGTACTTC	:::::::::0::15:18:18::26:28::36:::
1150	TGTGCCAGCAGCTTAACTTGGCAGGGTAAGTTCTTC	TRBV7-2	TRBD1	TRBJ2-1	TRBV7	TRBJ2	CASSLTWQGKFF	TGTGCCAGCAGCTTAACTTGGCAGGGTAAGTTCTTC	:::::::::0::15:21:::26:28::36:::
1151	TGTGCCAGCAGCTTAAGACAGAGCACTGAAGCTTTCTTT	TRBV7-6		TRBJ1-1	TRBV7	TRBJ1	CASSLRQSTEAFF	TGTGCCAGCAGCTTAAGACAGAGCACTGAAGCTTTCTTT	:::::::::0::15:::::20::39:::
1152	TGTGCCAGCAGCTTACAGGGGACCTACAATGAGCAGTTCTTC	TRBV7-6	TRBD1	TRBJ2-1	TRBV7	TRBJ2	CASSLQGTYNEQFF	TGTGCCAGCAGCTTACAGGGGACCTACAATGAGCAGTTCTTC	:::::::::0::15:15:::21:22::42:::
1153	TGTGCCAGCAGCTTAGAAACGGCAGGGGTGGAAAAACTGTTTTTT	TRBV13	TRBD1	TRBJ1-4	TRBV13*00	TRBJ1	CASSLETAGVEKLFF	TGTGCCAGCAGCTTAGAAACGGCAGGGGTGGAAAAACTGTTTTTT	:::::::::0::16:22:::28:30::45:::
1154	TGTGCCAGCAGCTTAGAGGGGACTTATGAAAAACTGTTTTTT	TRBV7-6	TRBD1	TRBJ1-4	TRBV7	TRBJ1	CASSLEGTYEKLFF	TGTGCCAGCAGCTTAGAGGGGACTTATGAAAAACTGTTTTTT	:::::::::0::16:16:::21:21::42:::
1155	TGTGCCAGCAGCTTAGAGGGGGCCGTTTTTGCTGAAGCTTTCTTT	TRBV11-2	TRBD1	TRBJ1-1	TRBV11	TRBJ1	CASSLEGAVFAEAFF	TGTGCCAGCAGCTTAGAGGGGGCCGTTTTTGCTGAAGCTTTCTTT	:::::::::0:17:17:17::23:23:31::45:::
1156	TGTGCCAGCAGCTTAGATCTCACAGGGGGAGCCTACGAGCAGTACTTC	TRBV11-2	TRBD1	TRBJ2-7	TRBV11	TRBJ2	CASSLDLTGGAYEQYF	TGTGCCAGCAGCTTAGATCTCACAGGGGGAGCCTACGAGCAGTACTTC	:::::::::0:17:20:21:::29:31::48:::
1157	TGTGCCAGCAGCTTAGCCCAGGCCTACGAGCAGTACGTC	TRBV7-8		TRBJ2-7	TRBV7	TRBJ2	CASSLAQAYEQYV	TGTGCCAGCAGCTTAGCCCAGGCCTACGAGCAGTACGTC	:::::::::0:17:17:::::22::39:::
1158	TGTGCCAGCAGCTTAGGACAGGGGGCGTCCATCGAGCAGTACTTC	TRBV13	TRBD1	TRBJ2-7	TRBV13*00	TRBJ2	CASSLGQGASIEQYF	TGTGCCAGCAGCTTAGGACAGGGGGCGTCCATCGAGCAGTACTTC	:::::::::0:17:17:17::26:30:32::45:::
1159	TGTGCCAGCAGCTTAGGACTAGCGGGGAACACTGAGCAGTTCTTC	TRBV11-2	TRBD2	TRBJ2-1	TRBV11	TRBJ2	CASSLGLAGNTEQFF	TGTGCCAGCAGCTTAGGACTAGCGGGGAACACTGAGCAGTTCTTC	:::::::::0::16:16:::26:28::45:::
1160	TGTGCCAGCAGCTTAGGAGGGGCTCCCTACAATGAGCAGTTCTTC	TRBV7-2		TRBJ2-1	TRBV7	TRBJ2	CASSLGGAPYNEQFF	TGTGCCAGCAGCTTAGGAGGGGCTCCCTACAATGAGCAGTTCTTC	:::::::::0::16:::::17:22:45:::
1161	TGTGCCAGCAGCTTAGGCGGGGCCCCATACAATGAGCAGTTCTTC	TRBV7-2	TRBD2	TRBJ2-1	TRBV7	TRBJ2	CASSLGGAPYNEQFF	TGTGCCAGCAGCTTAGGCGGGGCCCCATACAATGAGCAGTTCTTC	:::::::::0::16:19::22:25:27::45:::
1162	TGTGCCAGCAGCTTAGGGCCAAACAATGAGCAGTTCTTC	TRBV5-5		TRBJ2-1	TRBV5	TRBJ2	CASSLGPNNEQFF	TGTGCCAGCAGCTTAGGGCCAAACAATGAGCAGTTCTTC	:::::::::0:18:22:::::22::39:::
1163	TGTGCCAGCAGCTTAGGGCCTCAGCCCCAGCATTTT	TRBV13		TRBJ1-5	TRBV13*00	TRBJ1	CASSLGPQPQHF	TGTGCCAGCAGCTTAGGGCCTCAGCCCCAGCATTTT	:::::::::0:18:25:::::20::36:::
1164	TGTGCCAGCAGCTTAGGGCCTCAGCCCCAGTATTTT	TRBV13		TRBJ1-5	TRBV13*00	TRBJ1	CASSLGPQPQYF	TGTGCCAGCAGCTTAGGGCCTCAGCCCCAGTATTTT	:::::::::0:18:25:::::20::36:::
1165	TGTGCCAGCAGCTTAGGGGGGGCCTGGTACAATGAGCAGTTCTTC	TRBV7-2	TRBD1	TRBJ2-1	TRBV7	TRBJ2	CASSLGGAWYNEQFF	TGTGCCAGCAGCTTAGGGGGGGCCTGGTACAATGAGCAGTTCTTC	:::::::::0::16:17::23:23:27::45:::
1166	TGTGCCAGCAGCTTAGGTGTCGGGGGGCCCACAGATACGCAGTATTTT	TRBV11-2	TRBD2	TRBJ2-3	TRBV11	TRBJ2	CASSLGVGGPTDTQYF	TGTGCCAGCAGCTTAGGTGTCGGGGGGCCCACAGATACGCAGTATTTT	:::::::::0::16:20::27:29:29::48:::
1167	TGTGCCAGCAGCTTAGTAATAGCGGGGGGGCAATTGCAGTTCTTC	TRBV5-5	TRBD2	TRBJ2-1	TRBV5	TRBJ2	CASSLVIAGGQLQFF	TGTGCCAGCAGCTTAGTAATAGCGGGGGGGCAATTGCAGTTCTTC	:::::::::0::14:19::30:31:35::45:::
1168	TGTGCCAGCAGCTTATATGGGGAAAATTACTATGGCTACACCTTC	TRBV7-2		TRBJ1-2	TRBV7	TRBJ1	CASSLYGENYYGYTF	TGTGCCAGCAGCTTATATGGGGAAAATTACTATGGCTACACCTTC	:::::::::0::15:::::28::45:::
1169	TGTGCCAGCAGCTTATCCCTCGGGGGGCAATATAATGGCTACACCTTC	TRBV7-6	TRBD1	TRBJ1-2	TRBV7	TRBJ1	CASSLSLGGQYNGYTF	TGTGCCAGCAGCTTATCCCTCGGGGGGCAATATAATGGCTACACCTTC	:::::::::0::15:22::28:28:34::48:::
1170	TGTGCCAGCAGCTTATCCCTTGGTGGGAAAGGGGAGACCCAGTACTTC	TRBV13	TRBD1	TRBJ2-5	TRBV13*00	TRBJ2	CASSLSLGGKGETQYF	TGTGCCAGCAGCTTATCCCTTGGTGGGAAAGGGGAGACCCAGTACTTC	:::::::::0::15:24:24::33:33::48:::
1171	TGTGCCAGCAGCTTATGGCGGGGGAACACTGAAGCTTTCTTT	TRBV13		TRBJ1-1	TRBV13*00	TRBJ1	CASSLWRGNTEAFF	TGTGCCAGCAGCTTATGGCGGGGGAACACTGAAGCTTTCTTT	:::::::::0:18:19:::::23::42:::
1172	TGTGCCAGCAGCTTATGGGCCCGGGGGGGGACTGAAGCTTTCTTT	TRBV13	TRBD1	TRBJ1-1	TRBV13*00	TRBJ1	CASSLWARGGTEAFF	TGTGCCAGCAGCTTATGGGCCCGGGGGGGGACTGAAGCTTTCTTT	:::::::::0::15:19:22::25:30::45:::
1173	TGTGCCAGCAGCTTCCCGAACAATGAGCAGTTCTTC	TRBV7-9		TRBJ2-1	TRBV7	TRBJ2	CASSFPNNEQFF	TGTGCCAGCAGCTTCCCGAACAATGAGCAGTTCTTC	:::::::::0::14:::::19::36:::
1174	TGTGCCAGCAGCTTCCTTACTCCGGGACAGGTTCACTCTGGAAACACCATATATTTT	TRBV11-1	TRBD1	TRBJ1-3	TRBV11	TRBJ1	CASSFLTPGQVHSGNTIYF	TGTGCCAGCAGCTTCCTTACTCCGGGACAGGTTCACTCTGGAAACACCATATATTTT	:::::::::0::14:21:23::31:35:35:57:::
1175	TGTGCCAGCAGCTTGCAAGGACACGGGCTCTTCGGCACTAATGAAAAACTGTTTTTT	TRBV5-6	TRBD1	TRBJ1-4	TRBV5	TRBJ1	CASSLQGHGLFGTNEKLFF	TGTGCCAGCAGCTTGCAAGGACACGGGCTCTTCGGCACTAATGAAAAACTGTTTTTT	:::::::::0::15:18:::27:36::57:::
1176	TGTGCCAGCAGCTTGCAGGGGCGGGAAGCTTTCTTT	TRBV7-3	TRBD1	TRBJ1-1	TRBV7	TRBJ1	CASSLQGREAFF	TGTGCCAGCAGCTTGCAGGGGCGGGAAGCTTTCTTT	:::::::::0::14:15:::21:24::36:::
1177	TGTGCCAGCAGCTTGCAGGTAGATACGCAGTATTTT	TRBV5-6		TRBJ2-3	TRBV5	TRBJ2	CASSLQVDTQYF	TGTGCCAGCAGCTTGCAGGTAGATACGCAGTATTTT	:::::::::0::15:::::20::36:::
1178	TGTGCCAGCAGCTTGCCGGGACCGAGTACGGGTAATGAGCAGTTCTTC	TRBV5-6	TRBD1	TRBJ2-1	TRBV5	TRBJ2	CASSLPGPSTGNEQFF	TGTGCCAGCAGCTTGCCGGGACCGAGTACGGGTAATGAGCAGTTCTTC	:::::::::0::15:15:17::22:33::48:::
1179	TGTGCCAGCAGCTTGCCGGGACGGAGTACGGGTAATGAGCAGTTCTTC	TRBV5-6	TRBD1	TRBJ2-1	TRBV5	TRBJ2	CASSLPGRSTGNEQFF	TGTGCCAGCAGCTTGCCGGGACGGAGTACGGGTAATGAGCAGTTCTTC	:::::::::0::15:15:17::22:33::48:::
1180	TGTGCCAGCAGCTTGGAGGTTCTAGCGGGGGTGTACGAGCAGTACTTC	TRBV5-5	TRBD2	TRBJ2-7	TRBV5	TRBJ2	CASSLEVLAGVYEQYF	TGTGCCAGCAGCTTGGAGGTTCTAGCGGGGGTGTACGAGCAGTACTTC	:::::::::0:16:16:21:::29:33::48:::
1181	TGTGCCAGCAGCTTGGCCGGGAACACTGAAGCTTTCTTT	TRBV5-5		TRBJ1-1	TRBV5	TRBJ1	CASSLAGNTEAFF	TGTGCCAGCAGCTTGGCCGGGAACACTGAAGCTTTCTTT	:::::::::0:16:18:::::20::39:::
1182	TGTGCCAGCAGCTTGGCGGGGTCCACTGAAGCTTTCTTT	TRBV5-5		TRBJ1-1	TRBV5	TRBJ1	CASSLAGSTEAFF	TGTGCCAGCAGCTTGGCGGGGTCCACTGAAGCTTTCTTT	:::::::::0:16:17:::::23::39:::
1183	TGTGCCAGCAGCTTGGCTGCTAGCGGCTACGAGCAGTACTTC	TRBV5-4	TRBD2	TRBJ2-7	TRBV5	TRBJ2	CASSLAASGYEQYF	TGTGCCAGCAGCTTGGCTGCTAGCGGCTACGAGCAGTACTTC	:::::::::0:16:17:19:::26:26::42:::
1184	TGTGCCAGCAGCTTGGGCAGCCACTATGGCTACACCTTC	TRBV5-6		TRBJ1-2	TRBV5	TRBJ1	CASSLGSHYGYTF	TGTGCCAGCAGCTTGGGCAGCCACTATGGCTACACCTTC	:::::::::0:16:19:::::22::39:::
1185	TGTGCCAGCAGCTTGGGGGGGGACGCCTACGAGCAGTACTTC	TRBV5-4	TRBD1	TRBJ2-7	TRBV5	TRBJ2	CASSLGGDAYEQYF	TGTGCCAGCAGCTTGGGGGGGGACGCCTACGAGCAGTACTTC	:::::::::0:16:16:19:19::24:25::42:::
1186	TGTGCCAGCAGCTTGGGGGGGGTTGCGTACGAGCAGTACTTC	TRBV5-5	TRBD1	TRBJ2-7	TRBV5	TRBJ2	CASSLGGVAYEQYF	TGTGCCAGCAGCTTGGGGGGGGTTGCGTACGAGCAGTACTTC	:::::::::0:16:16:16:::21:27::42:::
1187	TGTGCCAGCAGCTTGGGTGGGGACGCCTACGAGCAGTACTTC	TRBV5-4	TRBD1	TRBJ2-7	TRBV5	TRBJ2	CASSLGGDAYEQYF	TGTGCCAGCAGCTTGGGTGGGGACGCCTACGAGCAGTACTTC	:::::::::0:16:16:19:19::24:25::42:::
1188	TGTGCCAGCAGCTTGTCAGGAGGTTCACCCCTCCACTTT	TRBV7-6	TRBD2	TRBJ1-6	TRBV7	TRBJ1	CASSLSGGSPLHF	TGTGCCAGCAGCTTGTCAGGAGGTTCACCCCTCCACTTT	:::::::::0::14:18:::23:23::39:::
1189	TGTGCCAGCAGCTTGTCGGGACTAAATGAGCAGTTCTTC	TRBV5-6	TRBD1	TRBJ2-1	TRBV5	TRBJ2	CASSLSGLNEQFF	TGTGCCAGCAGCTTGTCGGGACTAAATGAGCAGTTCTTC	:::::::::0::15:16:17::21:21::39:::
1190	TGTGCCAGCAGCTTGTCTGGGATAGGTGAGCAGTACTTC	TRBV5-5	TRBD1	TRBJ2-7	TRBV5	TRBJ2	CASSLSGIGEQYF	TGTGCCAGCAGCTTGTCTGGGATAGGTGAGCAGTACTTC	:::::::::0::15:18:18::26:27::39:::
1191	TGTGCCAGCAGCTTGTTGAGCGGGGGGGCCTACGAGCAGTACTTC	TRBV11-1	TRBD2	TRBJ2-7	TRBV11	TRBJ2	CASSLLSGGAYEQYF	TGTGCCAGCAGCTTGTTGAGCGGGGGGGCCTACGAGCAGTACTTC	:::::::::0::14:18::28:28:28::45:::
1192	TGTGCCAGCAGCTTTAACCTTATTCGAAACACCATATATTTT	TRBV7-3		TRBJ1-3	TRBV7	TRBJ1	CASSFNLIRNTIYF	TGTGCCAGCAGCTTTAACCTTATTCGAAACACCATATATTTT	:::::::::0:18:22:::::25::42:::
1193	TGTGCCAGCAGCTTTAACCTTATTGGAAACACCATGTATTTC	TRBV7-3		TRBJ1-3	TRBV7	TRBJ1	CASSFNLIGNTMYF	TGTGCCAGCAGCTTTAACCTTATTGGAAACACCATGTATTTC	:::::::::0:18:22:::::23::42:::
1194	TGTGCCAGCAGCTTTGAACTAGCCTACGAGCAGTACTTC	TRBV7-2	TRBD2	TRBJ2-7	TRBV7	TRBJ2	CASSFELAYEQYF	TGTGCCAGCAGCTTTGAACTAGCCTACGAGCAGTACTTC	:::::::::0::14:17:::22:22::39:::
1195	TGTGCCAGCAGCTTTGAGCGGGGGCCATCCTACGAGCAGTACTTC	TRBV7-6	TRBD1	TRBJ2-7	TRBV7	TRBJ2	CASSFERGPSYEQYF	TGTGCCAGCAGCTTTGAGCGGGGGCCATCCTACGAGCAGTACTTC	:::::::::0::14:19::25:25:27::45:::
1196	TGTGCCAGCAGCTTTGGGGGGACCTCCTACAATGAGCAGTTCTTC	TRBV9		TRBJ2-1	TRBV9*00	TRBJ2	CASSFGGTSYNEQFF	TGTGCCAGCAGCTTTGGGGGGACCTCCTACAATGAGCAGTTCTTC	:::::::::0::12:::::19:23:45:::
1197	TGTGCCAGCAGCTTTTACGGGGGCCAGAACACTGAAGCTTTCTTT	TRBV13	TRBD1	TRBJ1-1	TRBV13*00	TRBJ1	CASSFYGGQNTEAFF	TGTGCCAGCAGCTTTTACGGGGGCCAGAACACTGAAGCTTTCTTT	:::::::::0::14:18::24:24:26::45:::
1198	TGTGCCAGCAGGACGATAGCGGGCGCCTACGAGCAGTACTTC	TRBV6-1	TRBD2	TRBJ2-7	TRBV6	TRBJ2	CASRTIAGAYEQYF	TGTGCCAGCAGGACGATAGCGGGCGCCTACGAGCAGTACTTC	:::::::::0::11:16:::22:22:23:42:::
1199	TGTGCCAGCAGGATACAGGGTGGGAAAAAGACCCAGTACTTC	TRBV21-1	TRBD1	TRBJ2-5	TRBV21	TRBJ2	CASRIQGGKKTQYF	TGTGCCAGCAGGATACAGGGTGGGAAAAAGACCCAGTACTTC	:::::::::0::11:14:::20:25::42:::
1200	TGTGCCAGCAGGATACTAGCGGGGGTTCTCTACGAGCAGTACTTC	TRBV2	TRBD2	TRBJ2-7	TRBV2*00	TRBJ2	CASRILAGVLYEQYF	TGTGCCAGCAGGATACTAGCGGGGGTTCTCTACGAGCAGTACTTC	:::::::::0::11:14:::23:29::45:::
1201	TGTGCCAGCAGGCCGGGACAGGCCTACGAGCAGTACTTC	TRBV6-2	TRBD1	TRBJ2-7	TRBV6	TRBJ2	CASRPGQAYEQYF	TGTGCCAGCAGGCCGGGACAGGCCTACGAGCAGTACTTC	:::::::::0::11:12:14::22:22::39:::
1202	TGTGCCAGCAGGGAACAGGGCGCTACTGAAGCTTTCTTT	TRBV6-5	TRBD1	TRBJ1-1	TRBV6	TRBJ1	CASREQGATEAFF	TGTGCCAGCAGGGAACAGGGCGCTACTGAAGCTTTCTTT	:::::::::0::11:11:11:23:23:24::39:::
1203	TGTGCCAGCAGGGAGCAGGGTGGGTACGAGCAGTACTTC	TRBV6-1	TRBD1	TRBJ2-7	TRBV6	TRBJ2	CASREQGGYEQYF	TGTGCCAGCAGGGAGCAGGGTGGGTACGAGCAGTACTTC	:::::::::0::14:15:::20:24::39:::
1204	TGTGCCAGCAGGGCGGGGGTAGCCTACGAGCAGTACTTC	TRBV27	TRBD1	TRBJ2-7	TRBV27*00	TRBJ2	CASRAGVAYEQYF	TGTGCCAGCAGGGCGGGGGTAGCCTACGAGCAGTACTTC	:::::::::0::11:14:::19:22::39:::
1205	TGTGCCAGCAGGGGACAGGGGAACACTGAAGCTTTCTTT	TRBV6-1	TRBD1	TRBJ1-1	TRBV6	TRBJ1	CASRGQGNTEAFF	TGTGCCAGCAGGGGACAGGGGAACACTGAAGCTTTCTTT	:::::::::0::11:11:11::20:20::39:::
1206	TGTGCCAGCAGGGTTAGCGCGTCCCACGAGCAGTACGTC	TRBV6-1		TRBJ2-7	TRBV6	TRBJ2	CASRVSASHEQYV	TGTGCCAGCAGGGTTAGCGCGTCCCACGAGCAGTACGTC	:::::::::0:18:23:::::21::39:::
1207	TGTGCCAGCAGGGTTAGCGGGTCCCACGAGCAGTACGTC	TRBV6-5	TRBD2	TRBJ2-7	TRBV6	TRBJ2	CASRVSGSHEQYV	TGTGCCAGCAGGGTTAGCGGGTCCCACGAGCAGTACGTC	:::::::::0::11:14:::21:21::39:::
1208	TGTGCCAGCAGGTTACAAGGGTCAAGCGATGGCTACACCTTC	TRBV8-2		TRBJ1-2	TRBV8	TRBJ1	CASRLQGSSDGYTF	TGTGCCAGCAGGTTACAAGGGTCAAGCGATGGCTACACCTTC	:::::::::0::10:::::28::42:::
1209	TGTGCCAGCAGGTTAGGGGGGCGGCAGACGAACACCGGGGAGCTGTTTTTT	TRBV7-9	TRBD1	TRBJ2-2	TRBV7	TRBJ2	CASRLGGRQTNTGELFF	TGTGCCAGCAGGTTAGGGGGGCGGCAGACGAACACCGGGGAGCTGTTTTTT	:::::::::0::16:16::22:23:28:28:51:::
1210	TGTGCCAGCAGGTTTCTGGACACCCCTAACTATGGCTACACCTTC	TRBV28		TRBJ1-2	TRBV28*00	TRBJ1	CASRFLDTPNYGYTF	TGTGCCAGCAGGTTTCTGGACACCCCTAACTATGGCTACACCTTC	:::::::::0:18:18:::::25:25:45:::
1211	TGTGCCAGCAGTAAACAGGGAGGCGAAAAACTGTTTTTT	TRBV6-1	TRBD2	TRBJ1-4	TRBV6	TRBJ1	CASSKQGGEKLFF	TGTGCCAGCAGTAAACAGGGAGGCGAAAAACTGTTTTTT	:::::::::0::15:17:::23:24::39:::
1212	TGTGCCAGCAGTAACGGACGGAATCAGCCCCAGCATTTT	TRBV2		TRBJ1-5	TRBV2*00	TRBJ1	CASSNGRNQPQHF	TGTGCCAGCAGTAACGGACGGAATCAGCCCCAGCATTTT	:::::::::0::12:::::21::39:::
1213	TGTGCCAGCAGTAAGCAGGCGGAAGCTGAAGCTTTCTTT	TRBV6-1		TRBJ1-1	TRBV6	TRBJ1	CASSKQAEAEAFF	TGTGCCAGCAGTAAGCAGGCGGAAGCTGAAGCTTTCTTT	:::::::::0:16:16:::::25::39:::
1214	TGTGCCAGCAGTAAGCAGGGGGAAGCTGAAGCTTTCTTT	TRBV6-1	TRBD1	TRBJ1-1	TRBV6	TRBJ1	CASSKQGEAEAFF	TGTGCCAGCAGTAAGCAGGGGGAAGCTGAAGCTTTCTTT	:::::::::0:16:16:16:::22:25::39:::
1215	TGTGCCAGCAGTAAGGGGGGCGAAGCCTACGAGCAGTACTTC	TRBV12-3	TRBD1	TRBJ2-7	TRBV12	TRBJ2	CASSKGGEAYEQYF	TGTGCCAGCAGTAAGGGGGGCGAAGCCTACGAGCAGTACTTC	:::::::::0::12:15::21:22:25::42:::
1216	TGTGCCAGCAGTAATCAGGGGGCTTATGGCTACACCTTC	TRBV6-1	TRBD1	TRBJ1-2	TRBV6	TRBJ1	CASSNQGAYGYTF	TGTGCCAGCAGTAATCAGGGGGCTTATGGCTACACCTTC	:::::::::0::12:15::23:23:24::39:::
1217	TGTGCCAGCAGTAATGGGGAGATTTCCTACGAGCAGTACTTC	TRBV6-1	TRBD2	TRBJ2-7	TRBV6	TRBJ2	CASSNGEISYEQYF	TGTGCCAGCAGTAATGGGGAGATTTCCTACGAGCAGTACTTC	:::::::::0::12:16:::21:24::42:::
1218	TGTGCCAGCAGTACAGGGGGCACAGCCTACGAGCAGTACTTC	TRBV6-2	TRBD1	TRBJ2-7	TRBV6	TRBJ2	CASSTGGTAYEQYF	TGTGCCAGCAGTACAGGGGGCACAGCCTACGAGCAGTACTTC	:::::::::0::12:12::21:21:25::42:::
1219	TGTGCCAGCAGTACAGGGGTCAGGGGAGAGCAGTACGTC	TRBV6-4	TRBD1	TRBJ2-7	TRBV6	TRBJ2	CASSTGVRGEQYV	TGTGCCAGCAGTACAGGGGTCAGGGGAGAGCAGTACGTC	:::::::::0::12:16:16::26:27::39:::
1220	TGTGCCAGCAGTACAGGGTTGGCGTACGAGCAGTACTTC	TRBV6-2	TRBD1	TRBJ2-7	TRBV6	TRBJ2	CASSTGLAYEQYF	TGTGCCAGCAGTACAGGGTTGGCGTACGAGCAGTACTTC	:::::::::0::12:12:::18:24::39:::
1221	TGTGCCAGCAGTACCGACACGACAGGAGTCTATGGCTACACCTTC	TRBV27	TRBD1	TRBJ1-2	TRBV27*00	TRBJ1	CASSTDTTGVYGYTF	TGTGCCAGCAGTACCGACACGACAGGAGTCTATGGCTACACCTTC	:::::::::0::12:20:::26:29::45:::
1222	TGTGCCAGCAGTACCGCAATAGGCGGATATGGCTACACCTTC	TRBV6-1		TRBJ1-2	TRBV6	TRBJ1	CASSTAIGGYGYTF	TGTGCCAGCAGTACCGCAATAGGCGGATATGGCTACACCTTC	:::::::::0::12:::::27::42:::
1223	TGTGCCAGCAGTACGTCGGGGACAGGGGCCTACGGCTACACCTTC	TRBV6-2	TRBD1	TRBJ1-2	TRBV6	TRBJ1	CASSTSGTGAYGYTF	TGTGCCAGCAGTACGTCGGGGACAGGGGCCTACGGCTACACCTTC	:::::::::0:17:18:18:18::28:29::45:::
1224	TGTGCCAGCAGTACTGGACTAGCGGGAGTCTACGAGCAGTACTTC	TRBV27	TRBD2	TRBJ2-7	TRBV27*00	TRBJ2	CASSTGLAGVYEQYF	TGTGCCAGCAGTACTGGACTAGCGGGAGTCTACGAGCAGTACTTC	:::::::::0::12:15:::24:24:28:45:::
1225	TGTGCCAGCAGTAGACAGGTCGCCTACGAGCAGTACGTC	TRBV6-2	TRBD1	TRBJ2-7	TRBV6	TRBJ2	CASSRQVAYEQYV	TGTGCCAGCAGTAGACAGGTCGCCTACGAGCAGTACGTC	:::::::::0::12:13:::19:22::39:::
1226	TGTGCCAGCAGTAGCCTAGCGGGGGTTTATGAGCAGTTCTTC	TRBV27	TRBD2	TRBJ2-1	TRBV27*00	TRBJ2	CASSSLAGVYEQFF	TGTGCCAGCAGTAGCCTAGCGGGGGTTTATGAGCAGTTCTTC	:::::::::0::12:15:::23:28::42:::
1227	TGTGCCAGCAGTAGCGGGGGTGTGGGCTACAATGAGCAGTTCTTC	TRBV9	TRBD2	TRBJ2-1	TRBV9*00	TRBJ2	CASSSGGVGYNEQFF	TGTGCCAGCAGTAGCGGGGGTGTGGGCTACAATGAGCAGTTCTTC	:::::::::0::11:11:::18:26::45:::
1228	TGTGCCAGCAGTAGGGAGGTAGCCCACTATGGCTACACCTTC	TRBV28		TRBJ1-2	TRBV28*00	TRBJ1	CASSREVAHYGYTF	TGTGCCAGCAGTAGGGAGGTAGCCCACTATGGCTACACCTTC	:::::::::0::12:::::16:22:42:::
1229	TGTGCCAGCAGTATCCAGGGAGCGCAGGCGGAGGGCTACACCTTC	TRBV6-1	TRBD1	TRBJ1-2	TRBV6	TRBJ1	CASSIQGAQAEGYTF	TGTGCCAGCAGTATCCAGGGAGCGCAGGCGGAGGGCTACACCTTC	:::::::::0::12:15::23:25:33::45:::
1230	TGTGCCAGCAGTATCCAGGGAGCGCAGGCGGAGGGCTACATCTTC	TRBV6-1	TRBD1	TRBJ1-2	TRBV6	TRBJ1	CASSIQGAQAEGYIF	TGTGCCAGCAGTATCCAGGGAGCGCAGGCGGAGGGCTACATCTTC	:::::::::0::12:15::23:25:33::45:::
1231	TGTGCCAGCAGTATCCAGGGGGCGCAGGCGGAGGGCTACACCTTC	TRBV6-1	TRBD1	TRBJ1-2	TRBV6	TRBJ1	CASSIQGAQAEGYTF	TGTGCCAGCAGTATCCAGGGGGCGCAGGCGGAGGGCTACACCTTC	:::::::::0::12:15::23:25:33::45:::
1232	TGTGCCAGCAGTCAACAGGGATCTGGGGCCAACGTCCTGACTTTC	TRBV6-1		TRBJ2-6	TRBV6	TRBJ2	CASSQQGSGANVLTF	TGTGCCAGCAGTCAACAGGGATCTGGGGCCAACGTCCTGACTTTC	:::::::::0::15:::::15:20:45:::
1233	TGTGCCAGCAGTCAACAGGGGAGCCACGAGCAGTACGTC	TRBV6-1	TRBD1	TRBJ2-7	TRBV6	TRBJ2	CASSQQGSHEQYV	TGTGCCAGCAGTCAACAGGGGAGCCACGAGCAGTACGTC	:::::::::0::15:15:::21:25::39:::
1234	TGTGCCAGCAGTCAACAGGGGGGCCACGAGCAGTACGTC	TRBV6-1	TRBD1	TRBJ2-7	TRBV6	TRBJ2	CASSQQGGHEQYV	TGTGCCAGCAGTCAACAGGGGGGCCACGAGCAGTACGTC	:::::::::0::15:15::22:25:25::39:::
1235	TGTGCCAGCAGTCACCTGGGACAGGCCTACGAGCAGTACTTC	TRBV6-2	TRBD1	TRBJ2-7	TRBV6	TRBJ2	CASSHLGQAYEQYF	TGTGCCAGCAGTCACCTGGGACAGGCCTACGAGCAGTACTTC	:::::::::0::15:17:17::25:25::42:::
1236	TGTGCCAGCAGTCAGGGGATCTATGGCTACACCTTC	TRBV6-6	TRBD1	TRBJ1-2	TRBV6	TRBJ1	CASSQGIYGYTF	TGTGCCAGCAGTCAGGGGATCTATGGCTACACCTTC	:::::::::0::12:12:::18:20::36:::
1237	TGTGCCAGCAGTCCAGGGACAGCCTACGAGCAGTACTTC	TRBV7-2	TRBD1	TRBJ2-7	TRBV7	TRBJ2	CASSPGTAYEQYF	TGTGCCAGCAGTCCAGGGACAGCCTACGAGCAGTACTTC	:::::::::0::11:11:15::22:22::39:::
1238	TGTGCCAGCAGTCCAGGGCCGGGGACGCCCCAGCATTTT	TRBV6-1	TRBD2	TRBJ1-5	TRBV6	TRBJ1	CASSPGPGTPQHF	TGTGCCAGCAGTCCAGGGCCGGGGACGCCCCAGCATTTT	:::::::::0::12:14::18:20:26::39:::
1239	TGTGCCAGCAGTCCCAACGGGACAGGGGCATACGAGCAGTACTTC	TRBV12-3	TRBD1	TRBJ2-7	TRBV12	TRBJ2	CASSPNGTGAYEQYF	TGTGCCAGCAGTCCCAACGGGACAGGGGCATACGAGCAGTACTTC	:::::::::0::12:17:18::28:30::45:::
1240	TGTGCCAGCAGTCCCATCAGGGATCAGCCCCAGCATTTT	TRBV6-1	TRBD1	TRBJ1-5	TRBV6	TRBJ1	CASSPIRDQPQHF	TGTGCCAGCAGTCCCATCAGGGATCAGCCCCAGCATTTT	:::::::::0::12:17:::22:22::39:::
1241	TGTGCCAGCAGTCCCGGCGGGGGGTACGAGCAGTACGTC	TRBV6-2	TRBD2	TRBJ2-7	TRBV6	TRBJ2	CASSPGGGYEQYV	TGTGCCAGCAGTCCCGGCGGGGGGTACGAGCAGTACGTC	:::::::::0::12:16::24:24:24::39:::
1242	TGTGCCAGCAGTCCCGGGACAGCCTACGAGCAGTACTTC	TRBV28	TRBD1	TRBJ2-7	TRBV28*00	TRBJ2	CASSPGTAYEQYF	TGTGCCAGCAGTCCCGGGACAGCCTACGAGCAGTACTTC	:::::::::0::12:12:15::22:22::39:::
1243	TGTGCCAGCAGTCCCGGGCCGGGGACGCCCCAGCATTTC	TRBV6-1	TRBD1	TRBJ1-5	TRBV6	TRBJ1	CASSPGPGTPQHF	TGTGCCAGCAGTCCCGGGCCGGGGACGCCCCAGCATTTC	:::::::::0::12:12:15::24:26::39:::
1244	TGTGCCAGCAGTCCCGGGCCGGGGACGCCCCAGCATTTT	TRBV6-5	TRBD1	TRBJ1-5	TRBV6	TRBJ1	CASSPGPGTPQHF	TGTGCCAGCAGTCCCGGGCCGGGGACGCCCCAGCATTTT	:::::::::0::12:12:15::24:26::39:::
1245	TGTGCCAGCAGTCCCGGGCTAGCCTACGAGCAGTACGTC	TRBV6-5	TRBD2	TRBJ2-7	TRBV6	TRBJ2	CASSPGLAYEQYV	TGTGCCAGCAGTCCCGGGCTAGCCTACGAGCAGTACGTC	:::::::::0::12:12:15::22:22::39:::
1246	TGTGCCAGCAGTCCCGGGGAGAACTATGGCTACACCTTC	TRBV6-1	TRBD1	TRBJ1-2	TRBV6	TRBJ1	CASSPGENYGYTF	TGTGCCAGCAGTCCCGGGGAGAACTATGGCTACACCTTC	:::::::::0::12:12:15::18:21::39:::
1247	TGTGCCAGCAGTCCCTCACAGGGTTACGAGCAGTACGTC	TRBV27	TRBD1	TRBJ2-7	TRBV27*00	TRBJ2	CASSPSQGYEQYV	TGTGCCAGCAGTCCCTCACAGGGTTACGAGCAGTACGTC	:::::::::0::12:17:::23:24::39:::
1248	TGTGCCAGCAGTCCCTCGGACTTAGCCTATGGCTACACCTTC	TRBV6-6		TRBJ1-2	TRBV6	TRBJ1	CASSPSDLAYGYTF	TGTGCCAGCAGTCCCTCGGACTTAGCCTATGGCTACACCTTC	:::::::::0:17:18:::::26::42:::
1249	TGTGCCAGCAGTCCCTCTAGCGGGGGAATCTACGAGCAGTACGTC	TRBV27	TRBD2	TRBJ2-7	TRBV27*00	TRBJ2	CASSPSSGGIYEQYV	TGTGCCAGCAGTCCCTCTAGCGGGGGAATCTACGAGCAGTACGTC	:::::::::0::12:16:::24:29::45:::
1250	TGTGCCAGCAGTCCGAAAACAGGGGGCTCCGGGGAGCTGTTTTTT	TRBV27	TRBD1	TRBJ2-2	TRBV27*00	TRBJ2	CASSPKTGGSGELFF	TGTGCCAGCAGTCCGAAAACAGGGGGCTCCGGGGAGCTGTTTTTT	:::::::::0::12:18::27:27:28::45:::
1251	TGTGCCAGCAGTCCGACAGGGGCCTATGGCTACACCTTC	TRBV27	TRBD1	TRBJ1-2	TRBV27*00	TRBJ1	CASSPTGAYGYTF	TGTGCCAGCAGTCCGACAGGGGCCTATGGCTACACCTTC	:::::::::0::12:14:::22:23::39:::
1252	TGTGCCAGCAGTCCGCAAGCGGGGGGGGCCTACGAGCAGTACTTC	TRBV27	TRBD2	TRBJ2-7	TRBV27*00	TRBJ2	CASSPQAGGAYEQYF	TGTGCCAGCAGTCCGCAAGCGGGGGGGGCCTACGAGCAGTACTTC	:::::::::0::12:17::27:27:28::45:::
1253	TGTGCCAGCAGTCCGCAGGGGGCATATGGCTACACCTTC	TRBV6-1	TRBD1	TRBJ1-2	TRBV6	TRBJ1	CASSPQGAYGYTF	TGTGCCAGCAGTCCGCAGGGGGCATATGGCTACACCTTC	:::::::::0::12:15::23:23:24::39:::
1254	TGTGCCAGCAGTCCGGCCCCGACAGGGGCATCCTACGAGCAGTACTCC	TRBV27	TRBD1	TRBJ2-7	TRBV27*00	TRBJ2	CASSPAPTGASYEQYS	TGTGCCAGCAGTCCGGCCCCGACAGGGGCATCCTACGAGCAGTACTCC	:::::::::0::12:15:::20:23:28:48:::
1255	TGTGCCAGCAGTCCGGGGGAAGGGGCTTACGAGCAGTACTTC	TRBV27	TRBD1	TRBJ2-7	TRBV27*00	TRBJ2	CASSPGEGAYEQYF	TGTGCCAGCAGTCCGGGGGAAGGGGCTTACGAGCAGTACTTC	:::::::::0::12:16:16::25:27::42:::
1256	TGTGCCAGCAGTCCGGGGGGGGCCCCCTACAATGAGCAGTTCTTC	TRBV9	TRBD1	TRBJ2-1	TRBV9*00	TRBJ2	CASSPGGAPYNEQFF	TGTGCCAGCAGTCCGGGGGGGGCCCCCTACAATGAGCAGTTCTTC	:::::::::0::11:15::21:25:25::45:::
1257	TGTGCCAGCAGTCCTGGGACCGCCTACGAGCAGTACTTC	TRBV27		TRBJ2-7	TRBV27*00	TRBJ2	CASSPGTAYEQYF	TGTGCCAGCAGTCCTGGGACCGCCTACGAGCAGTACTTC	:::::::::0::12:::::16:20:39:::
1258	TGTGCCAGCAGTCCTGGGACTAGCGGGGGAGCCTACGAGCAGTACTTC	TRBV6-8	TRBD2	TRBJ2-7	TRBV6	TRBJ2	CASSPGTSGGAYEQYF	TGTGCCAGCAGTCCTGGGACTAGCGGGGGAGCCTACGAGCAGTACTTC	:::::::::0::12:12:15::27:31::48:::
1259	TGTGCCAGCAGTCCTGGGCCGTGGGGTATTGCTTTCTTT	TRBV6-5	TRBD2	TRBJ1-1	TRBV6	TRBJ1	CASSPGPWGIAFF	TGTGCCAGCAGTCCTGGGCCGTGGGGTATTGCTTTCTTT	:::::::::0::12:15::18:20:30::39:::
1260	TGTGCCAGCAGTCCTTCGTCCCAGGGGGGCTATGGCTACACCTTC	TRBV6-1	TRBD1	TRBJ1-2	TRBV6	TRBJ1	CASSPSSQGGYGYTF	TGTGCCAGCAGTCCTTCGTCCCAGGGGGGCTATGGCTACACCTTC	:::::::::0::12:21:::28:29::45:::
1261	TGTGCCAGCAGTCGACAGGGGGCGTATGGCTACACCTTC	TRBV12-3	TRBD1	TRBJ1-2	TRBV12	TRBJ1	CASSRQGAYGYTF	TGTGCCAGCAGTCGACAGGGGGCGTATGGCTACACCTTC	:::::::::0::12:13::23:24:24::39:::
1262	TGTGCCAGCAGTCGGACAGGGTCAGACGAAAAACTGTTTTTT	TRBV6-1	TRBD1	TRBJ1-4	TRBV6	TRBJ1	CASSRTGSDEKLFF	TGTGCCAGCAGTCGGACAGGGTCAGACGAAAAACTGTTTTTT	:::::::::0::12:13:::21:27::42:::
1263	TGTGCCAGCAGTCTACAGGGGGCTTATGGCTACACCTTC	TRBV6-5	TRBD1	TRBJ1-2	TRBV6	TRBJ1	CASSLQGAYGYTF	TGTGCCAGCAGTCTACAGGGGGCTTATGGCTACACCTTC	:::::::::0::16:16::23:23:24::39:::
1264	TGTGCCAGCAGTCTGAGGGGAGGCTATGGCTACACCTTC	TRBV28	TRBD2	TRBJ1-2	TRBV28*00	TRBJ1	CASSLRGGYGYTF	TGTGCCAGCAGTCTGAGGGGAGGCTATGGCTACACCTTC	:::::::::0::12:17:::23:23::39:::
1265	TGTGCCAGCAGTCTTAAACCCGACGGTTACGAGCAGTACGTC	TRBV6-2		TRBJ2-7	TRBV6	TRBJ2	CASSLKPDGYEQYV	TGTGCCAGCAGTCTTAAACCCGACGGTTACGAGCAGTACGTC	:::::::::0::12:::::27::42:::
1266	TGTGCCAGCAGTGAAAACGGACAGACTGAAGCTTTCTTT	TRBV6-1	TRBD1	TRBJ1-1	TRBV6	TRBJ1	CASSENGQTEAFF	TGTGCCAGCAGTGAAAACGGACAGACTGAAGCTTTCTTT	:::::::::0::15:18:::24:24::39:::
1267	TGTGCCAGCAGTGAAAATGAAGGGAACTATGGCTACACCTTC	TRBV7-2		TRBJ1-2	TRBV7	TRBJ1	CASSENEGNYGYTF	TGTGCCAGCAGTGAAAATGAAGGGAACTATGGCTACACCTTC	:::::::::0::11:::::24::42:::
1268	TGTGCCAGCAGTGAACCGGGAGGGATTGAAGCTTTCTTT	TRBV6-1	TRBD2	TRBJ1-1	TRBV6	TRBJ1	CASSEPGGIEAFF	TGTGCCAGCAGTGAACCGGGAGGGATTGAAGCTTTCTTT	:::::::::0:17:18:18::24:24:26::39:::
1269	TGTGCCAGCAGTGAAGCCACAGGGATTGCCTACGAGCAGTACTTC	TRBV6-1	TRBD1	TRBJ2-7	TRBV6	TRBJ2	CASSEATGIAYEQYF	TGTGCCAGCAGTGAAGCCACAGGGATTGCCTACGAGCAGTACTTC	:::::::::0:17:17:18:::24:28::45:::
1270	TGTGCCAGCAGTGAAGCCCCTAGCGGGGGCTACGAGCAGTACTTC	TRBV2	TRBD2	TRBJ2-7	TRBV2*00	TRBJ2	CASSEAPSGGYEQYF	TGTGCCAGCAGTGAAGCCCCTAGCGGGGGCTACGAGCAGTACTTC	:::::::::0:17:17:19:::27:29::45:::
1271	TGTGCCAGCAGTGAAGCGATAGGGGGAATTGCCTACGAGCAGTACGTC	TRBV6-1	TRBD1	TRBJ2-7	TRBV6	TRBJ2	CASSEAIGGIAYEQYV	TGTGCCAGCAGTGAAGCGATAGGGGGAATTGCCTACGAGCAGTACGTC	:::::::::0:17:18:20:::26:31::48:::
1272	TGTGCCAGCAGTGAAGCGCGGGCAGCCTATGGCTACACCTTC	TRBV2		TRBJ1-2	TRBV2*00	TRBJ1	CASSEARAAYGYTF	TGTGCCAGCAGTGAAGCGCGGGCAGCCTATGGCTACACCTTC	:::::::::0:17:19:::::26::42:::
1273	TGTGCCAGCAGTGAAGCGCTTCAGGGGGTAGCCTATGGCTACACCTTC	TRBV6-1	TRBD1	TRBJ1-2	TRBV6	TRBJ1	CASSEALQGVAYGYTF	TGTGCCAGCAGTGAAGCGCTTCAGGGGGTAGCCTATGGCTACACCTTC	:::::::::0:17:23:23:::28:32::48:::
1274	TGTGCCAGCAGTGAAGCGGTACAGGGTACGGGTTACGAGCAGTACGTC	TRBV6-1	TRBD1	TRBJ2-7	TRBV6	TRBJ2	CASSEAVQGTGYEQYV	TGTGCCAGCAGTGAAGCGGTACAGGGTACGGGTTACGAGCAGTACGTC	:::::::::0:17:18:20:::26:33::48:::
1275	TGTGCCAGCAGTGAAGGATCCGGATTCTCTGGATACACCATATATTTT	TRBV2		TRBJ1-3	TRBV2*00	TRBJ1	CASSEGSGFSGYTIYF	TGTGCCAGCAGTGAAGGATCCGGATTCTCTGGATACACCATATATTTT	:::::::::0::16:::::26:26:48:::
1276	TGTGCCAGCAGTGAAGGGGGGTCCTACGAGCAGTACTTC	TRBV6-1	TRBD1	TRBJ2-7	TRBV6	TRBJ2	CASSEGGSYEQYF	TGTGCCAGCAGTGAAGGGGGGTCCTACGAGCAGTACTTC	:::::::::0::16:16:::21:21::39:::
1277	TGTGCCAGCAGTGAAGGGGGGTGCTACGAGCAGTACTTC	TRBV6-1	TRBD1	TRBJ2-7	TRBV6	TRBJ2	CASSEGGCYEQYF	TGTGCCAGCAGTGAAGGGGGGTGCTACGAGCAGTACTTC	:::::::::0::16:16:::21:23::39:::
1278	TGTGCCAGCAGTGAAGGGGTGGTAGGTGTTTATGGCTACACCTTC	TRBV6-1		TRBJ1-2	TRBV6	TRBJ1	CASSEGVVGVYGYTF	TGTGCCAGCAGTGAAGGGGTGGTAGGTGTTTATGGCTACACCTTC	:::::::::0::16:::::30::45:::
1279	TGTGCCAGCAGTGAAGGGTCAGCCTACGAGCAGTACTTC	TRBV2		TRBJ2-7	TRBV2*00	TRBJ2	CASSEGSAYEQYF	TGTGCCAGCAGTGAAGGGTCAGCCTACGAGCAGTACTTC	:::::::::0::16:::::22::39:::
1280	TGTGCCAGCAGTGAATGGGGTCCGGGTGGCTACACCTTC	TRBV2	TRBD1	TRBJ1-2	TRBV2*00	TRBJ1	CASSEWGPGGYTF	TGTGCCAGCAGTGAATGGGGTCCGGGTGGCTACACCTTC	:::::::::0::15:21:23::26:26::39:::
1281	TGTGCCAGCAGTGACACCGGGACAGGGGCCTACGAGCAGTACTTC	TRBV6-2	TRBD1	TRBJ2-7	TRBV6	TRBJ2	CASSDTGTGAYEQYF	TGTGCCAGCAGTGACACCGGGACAGGGGCCTACGAGCAGTACTTC	:::::::::0::15:16:18::28:28::45:::
1282	TGTGCCAGCAGTGACAGGGAGGTATATGGCTACACCTTC	TRBV6-1	TRBD2	TRBJ1-2	TRBV6	TRBJ1	CASSDREVYGYTF	TGTGCCAGCAGTGACAGGGAGGTATATGGCTACACCTTC	:::::::::0::14:16:::22:24::39:::
1283	TGTGCCAGCAGTGACAGGGAGGTCTATGGCTACACCTTC	TRBV6-1	TRBD2	TRBJ1-2	TRBV6	TRBJ1	CASSDREVYGYTF	TGTGCCAGCAGTGACAGGGAGGTCTATGGCTACACCTTC	:::::::::0::14:16:::22:23::39:::
1284	TGTGCCAGCAGTGACGCCGCAGGGATTGGCTACGAGCAGTACTTC	TRBV6-1	TRBD1	TRBJ2-7	TRBV6	TRBJ2	CASSDAAGIGYEQYF	TGTGCCAGCAGTGACGCCGCAGGGATTGGCTACGAGCAGTACTTC	:::::::::0:17:17:19:::24:29::45:::
1285	TGTGCCAGCAGTGACGGACAGGGGGCGTCCTATGGCTACACCTTC	TRBV6-1	TRBD1	TRBJ1-2	TRBV6	TRBJ1	CASSDGQGASYGYTF	TGTGCCAGCAGTGACGGACAGGGGGCGTCCTATGGCTACACCTTC	:::::::::0::14:15::26:27:29::45:::
1286	TGTGCCAGCAGTGACGGGGTGGTAGGTGTTTATGGCTACACCTTC	TRBV6-5		TRBJ1-2	TRBV6	TRBJ1	CASSDGVVGVYGYTF	TGTGCCAGCAGTGACGGGGTGGTAGGTGTTTATGGCTACACCTTC	:::::::::0::15:::::30::45:::
1287	TGTGCCAGCAGTGACGGTCCCTCCTACGAGCAGTACGTC	TRBV6-2		TRBJ2-7	TRBV6	TRBJ2	CASSDGPSYEQYV	TGTGCCAGCAGTGACGGTCCCTCCTACGAGCAGTACGTC	:::::::::0::15:::::20:20:39:::
1288	TGTGCCAGCAGTGACTCTCATACAGGGGCCTATGGCTACACCTTC	TRBV6-4	TRBD1	TRBJ1-2	TRBV6	TRBJ1	CASSDSHTGAYGYTF	TGTGCCAGCAGTGACTCTCATACAGGGGCCTATGGCTACACCTTC	:::::::::0:17:17:21:::28:29::45:::
1289	TGTGCCAGCAGTGAGCAAATCTATGGCTACACCTTC	TRBV6-1		TRBJ1-2	TRBV6	TRBJ1	CASSEQIYGYTF	TGTGCCAGCAGTGAGCAAATCTATGGCTACACCTTC	:::::::::0::14:::::0:15:36:::
1290	TGTGCCAGCAGTGAGCACGGCAGAGGCTACACCTTC	TRBV25-1		TRBJ1-2	TRBV25	TRBJ1	CASSEHGRGYTF	TGTGCCAGCAGTGAGCACGGCAGAGGCTACACCTTC	:::::::::0::14:::::24::36:::
1291	TGTGCCAGCAGTGAGCTAGGGGGGTCTTTATACGAGCAGTACTTC	TRBV6-1	TRBD1	TRBJ2-7	TRBV6	TRBJ2	CASSELGGSLYEQYF	TGTGCCAGCAGTGAGCTAGGGGGGTCTTTATACGAGCAGTACTTC	:::::::::0::14:17:::23:30::45:::
1292	TGTGCCAGCAGTGAGGGACAGGGAAGCAATCAGCCCCAGCATTTT	TRBV25-1	TRBD1	TRBJ1-5	TRBV25	TRBJ1	CASSEGQGSNQPQHF	TGTGCCAGCAGTGAGGGACAGGGAAGCAATCAGCCCCAGCATTTT	:::::::::0::14:14:14::23:24::45:::
1293	TGTGCCAGCAGTGAGGGACCGGGAAGCAATCAGCCCCAGCATTTT	TRBV25-1	TRBD1	TRBJ1-5	TRBV25	TRBJ1	CASSEGPGSNQPQHF	TGTGCCAGCAGTGAGGGACCGGGAAGCAATCAGCCCCAGCATTTT	:::::::::0::14:14:14::23:24::45:::
1294	TGTGCCAGCAGTGAGTGGGTGCAAAGTCCCACTGAAGCTTTCTTT	TRBV2	TRBD2	TRBJ1-1	TRBV2*00	TRBJ1	CASSEWVQSPTEAFF	TGTGCCAGCAGTGAGTGGGTGCAAAGTCCCACTGAAGCTTTCTTT	:::::::::0::14:24:::29:29::45:::
1295	TGTGCCAGCAGTGATGGGACCTTCTGGGAGCAGTACTTC	TRBV6-1	TRBD1	TRBJ2-7	TRBV6	TRBJ2	CASSDGTFWEQYF	TGTGCCAGCAGTGATGGGACCTTCTGGGAGCAGTACTTC	:::::::::0::14:15:15::20:27::39:::
1296	TGTGCCAGCAGTGATGGGATTTCCTACGAGCAGTACGTC	TRBV6-2		TRBJ2-7	TRBV6	TRBJ2	CASSDGISYEQYV	TGTGCCAGCAGTGATGGGATTTCCTACGAGCAGTACGTC	:::::::::0::12:::::21::39:::
1297	TGTGCCAGCAGTGATTACGTAGCTAATGAGCAGTTCTTC	TRBV6-4		TRBJ2-1	TRBV6	TRBJ2	CASSDYVANEQFF	TGTGCCAGCAGTGATTACGTAGCTAATGAGCAGTTCTTC	:::::::::0::14:::::24::39:::
1298	TGTGCCAGCAGTGCACAGGGGGCATATGGCTACACCTTC	TRBV6-1	TRBD1	TRBJ1-2	TRBV6	TRBJ1	CASSAQGAYGYTF	TGTGCCAGCAGTGCACAGGGGGCATATGGCTACACCTTC	:::::::::0::13:14::23:23:24::39:::
1299	TGTGCCAGCAGTGCAGGAGGGGCATACGAGCAGTACTTC	TRBV6-6	TRBD2	TRBJ2-7	TRBV6	TRBJ2	CASSAGGAYEQYF	TGTGCCAGCAGTGCAGGAGGGGCATACGAGCAGTACTTC	:::::::::0::12:12::21:21:24::39:::
1300	TGTGCCAGCAGTGCAGGAGGGGCCTACGAGCAGTACTTC	TRBV6-6	TRBD2	TRBJ2-7	TRBV6	TRBJ2	CASSAGGAYEQYF	TGTGCCAGCAGTGCAGGAGGGGCCTACGAGCAGTACTTC	:::::::::0::12:12::21:21:22::39:::
1301	TGTGCCAGCAGTGCAGGGACAGGGGAGGCCTACGAGCAGTACTTC	TRBV27	TRBD1	TRBJ2-7	TRBV27*00	TRBJ2	CASSAGTGEAYEQYF	TGTGCCAGCAGTGCAGGGACAGGGGAGGCCTACGAGCAGTACTTC	:::::::::0::12:15:15::25:28::45:::
1302	TGTGCCAGCAGTGCCACAGGGGGCACTGAAGCTTTCTTT	TRBV12-3	TRBD1	TRBJ1-1	TRBV12	TRBJ1	CASSATGGTEAFF	TGTGCCAGCAGTGCCACAGGGGGCACTGAAGCTTTCTTT	:::::::::0::12:15:::23:23::39:::
1303	TGTGCCAGCAGTGCCCTTAGACAGGCCTATGGCTACACCTTC	TRBV6-5	TRBD1	TRBJ1-2	TRBV6	TRBJ1	CASSALRQAYGYTF	TGTGCCAGCAGTGCCCTTAGACAGGCCTATGGCTACACCTTC	:::::::::0::12:19:::25:26::42:::
1304	TGTGCCAGCAGTGCCGCACCAGGGGATCGGAATGAGCAGTTCTTC	TRBV25-1	TRBD1	TRBJ2-1	TRBV25	TRBJ2	CASSAAPGDRNEQFF	TGTGCCAGCAGTGCCGCACCAGGGGATCGGAATGAGCAGTTCTTC	:::::::::0::13:19:::25:30::45:::
1305	TGTGCCAGCAGTGCCGCCGGGACCCCTGCCTACGAGCAGTACTTC	TRBV27	TRBD1	TRBJ2-7	TRBV27*00	TRBJ2	CASSAAGTPAYEQYF	TGTGCCAGCAGTGCCGCCGGGACCCCTGCCTACGAGCAGTACTTC	:::::::::0::12:16:18::23:28::45:::
1306	TGTGCCAGCAGTGCCGGGGGGGGTCAGCCCCAGCATTTT	TRBV28	TRBD2	TRBJ1-5	TRBV28*00	TRBJ1	CASSAGGGQPQHF	TGTGCCAGCAGTGCCGGGGGGGGTCAGCCCCAGCATTTT	:::::::::0::12:14::22:22:23::39:::
1307	TGTGCCAGCAGTGCCTATGAAAAACTGTTTTTT	TRBV2		TRBJ1-4	TRBV2*00	TRBJ1	CASSAYEKLFF	TGTGCCAGCAGTGCCTATGAAAAACTGTTTTTT	:::::::::0::13:::::16::33:::
1308	TGTGCCAGCAGTGCCTCACCAGGGGATCGTAATGAGCAGTTCTTC	TRBV25-1	TRBD1	TRBJ2-1	TRBV25	TRBJ2	CASSASPGDRNEQFF	TGTGCCAGCAGTGCCTCACCAGGGGATCGTAATGAGCAGTTCTTC	:::::::::0::13:19:::25:30::45:::
1309	TGTGCCAGCAGTGCCTGGACAGGGGGCACAGATACGCAGTATTTT	TRBV6-1	TRBD1	TRBJ2-3	TRBV6	TRBJ2	CASSAWTGGTDTQYF	TGTGCCAGCAGTGCCTGGACAGGGGGCACAGATACGCAGTATTTT	:::::::::0::13:13:15::25:25::45:::
1310	TGTGCCAGCAGTGCGGGACAGGCCGCCTACGAGCAGTACTTC	TRBV6-1	TRBD1	TRBJ2-7	TRBV6	TRBJ2	CASSAGQAAYEQYF	TGTGCCAGCAGTGCGGGACAGGCCGCCTACGAGCAGTACTTC	:::::::::0::13:13:14::22:25::42:::
1311	TGTGCCAGCAGTGCGGGGCCCAATCAGCCCCAGCATTTT	TRBV12-3	TRBD1	TRBJ1-5	TRBV12	TRBJ1	CASSAGPNQPQHF	TGTGCCAGCAGTGCGGGGCCCAATCAGCCCCAGCATTTT	:::::::::0::12:14::19:19:20::39:::
1312	TGTGCCAGCAGTGCGGGGGCTGGCCAGCCCCAGCATTTT	TRBV6-3	TRBD1	TRBJ1-5	TRBV6	TRBJ1	CASSAGAGQPQHF	TGTGCCAGCAGTGCGGGGGCTGGCCAGCCCCAGCATTTT	:::::::::0::12:14::20:20:24::39:::
1313	TGTGCCAGCAGTGCGGTACGGACAGGGAACTACGAGCAGTACGTC	TRBV2	TRBD1	TRBJ2-7	TRBV2*00	TRBJ2	CASSAVRTGNYEQYV	TGTGCCAGCAGTGCGGTACGGACAGGGAACTACGAGCAGTACGTC	:::::::::0::13:19:::27:29::45:::
1314	TGTGCCAGCAGTGCTACAGGGGCAACGGAAGCTTTCTTT	TRBV25-1	TRBD1	TRBJ1-1	TRBV25	TRBJ1	CASSATGATEAFF	TGTGCCAGCAGTGCTACAGGGGCAACGGAAGCTTTCTTT	:::::::::0::13:15:::22:24::39:::
1315	TGTGCCAGCAGTGCTACCGGGACAGGGGCATATGGCTACACCTTC	TRBV6-6	TRBD1	TRBJ1-2	TRBV6	TRBJ1	CASSATGTGAYGYTF	TGTGCCAGCAGTGCTACCGGGACAGGGGCATATGGCTACACCTTC	:::::::::0::12:16:18::28:30::45:::
1316	TGTGCCAGCAGTGCTCAGGGGGCCTACGAGCAGTACTTC	TRBV12-4	TRBD1	TRBJ2-7	TRBV12	TRBJ2	CASSAQGAYEQYF	TGTGCCAGCAGTGCTCAGGGGGCCTACGAGCAGTACTTC	:::::::::0::12:15:::22:22::39:::
1317	TGTGCCAGCAGTGGACAGGCGGCCTACGAGCAGTACGTC	TRBV6-2	TRBD1	TRBJ2-7	TRBV6	TRBJ2	CASSGQAAYEQYV	TGTGCCAGCAGTGGACAGGCGGCCTACGAGCAGTACGTC	:::::::::0::12:12:::22:22::39:::
1318	TGTGCCAGCAGTGGACAGGGCTCCTACGAGCAGTACGTC	TRBV6-2		TRBJ2-7	TRBV6	TRBJ2	CASSGQGSYEQYV	TGTGCCAGCAGTGGACAGGGCTCCTACGAGCAGTACGTC	:::::::::0::12:::::16:20:39:::
1319	TGTGCCAGCAGTGGACAGGGGGCATATGAGCAGTTCTTC	TRBV6-2	TRBD1	TRBJ2-1	TRBV6	TRBJ2	CASSGQGAYEQFF	TGTGCCAGCAGTGGACAGGGGGCATATGAGCAGTTCTTC	:::::::::0::12:12::23:23:25::39:::
1320	TGTGCCAGCAGTGGACAGGGGGCTTACGAGCAGTACTTC	TRBV6-1	TRBD1	TRBJ2-7	TRBV6	TRBJ2	CASSGQGAYEQYF	TGTGCCAGCAGTGGACAGGGGGCTTACGAGCAGTACTTC	:::::::::0::13:13::23:23:24::39:::
1321	TGTGCCAGCAGTGGACAGGGGGCTTATGAGCAGTTCTTC	TRBV6-1	TRBD1	TRBJ2-1	TRBV6	TRBJ2	CASSGQGAYEQFF	TGTGCCAGCAGTGGACAGGGGGCTTATGAGCAGTTCTTC	:::::::::0::13:13::23:23:25::39:::
1322	TGTGCCAGCAGTGGACAGGGTATCGCCTACGAGCAGTACTTC	TRBV6-1	TRBD1	TRBJ2-7	TRBV6	TRBJ2	CASSGQGIAYEQYF	TGTGCCAGCAGTGGACAGGGTATCGCCTACGAGCAGTACTTC	:::::::::0::13:13:::20:25::42:::
1323	TGTGCCAGCAGTGGAGCAGGGGGCGCCTATGGCTACACCTTC	TRBV6-1	TRBD1	TRBJ1-2	TRBV6	TRBJ1	CASSGAGGAYGYTF	TGTGCCAGCAGTGGAGCAGGGGGCGCCTATGGCTACACCTTC	:::::::::0:17:17:17::24:26:26::42:::
1324	TGTGCCAGCAGTGGAGCAGGGGGCGCCTATGGCTACTTCTTC	TRBV6-1	TRBD1	TRBJ1-2	TRBV6	TRBJ1	CASSGAGGAYGYFF	TGTGCCAGCAGTGGAGCAGGGGGCGCCTATGGCTACTTCTTC	:::::::::0:17:17:17::24:26:26::42:::
1325	TGTGCCAGCAGTGGAGCGGGGGCCTACGAGCAGTACGTC	TRBV6-1		TRBJ2-7	TRBV6	TRBJ2	CASSGAGAYEQYV	TGTGCCAGCAGTGGAGCGGGGGCCTACGAGCAGTACGTC	:::::::::0:17:18:::::22::39:::
1326	TGTGCCAGCAGTGGAGGGACGGGGAATGCCTACGAGCAGTACTTC	TRBV2	TRBD1	TRBJ2-7	TRBV2*00	TRBJ2	CASSGGTGNAYEQYF	TGTGCCAGCAGTGGAGGGACGGGGAATGCCTACGAGCAGTACTTC	:::::::::0::16:16:::24:28::45:::
1327	TGTGCCAGCAGTGGCACAGGGGCTTATGGCTACACCTTC	TRBV27	TRBD1	TRBJ1-2	TRBV27*00	TRBJ1	CASSGTGAYGYTF	TGTGCCAGCAGTGGCACAGGGGCTTATGGCTACACCTTC	:::::::::0::12:12:12::22:24::39:::
1328	TGTGCCAGCAGTGGCCAGCCTTCGGTTACTGAAGCTTTCTTT	TRBV6-1		TRBJ1-1	TRBV6	TRBJ1	CASSGQPSVTEAFF	TGTGCCAGCAGTGGCCAGCCTTCGGTTACTGAAGCTTTCTTT	:::::::::0::13:::::27::42:::
1329	TGTGCCAGCAGTGGCCTAGCGGGATCGGGCGATACGCAGTATTTT	TRBV2	TRBD2	TRBJ2-3	TRBV2*00	TRBJ2	CASSGLAGSGDTQYF	TGTGCCAGCAGTGGCCTAGCGGGATCGGGCGATACGCAGTATTTT	:::::::::0::13:15:::24:30::45:::
1330	TGTGCCAGCAGTGGCGGGGGGGCCTACGAGCAGTACTTC	TRBV27	TRBD2	TRBJ2-7	TRBV27*00	TRBJ2	CASSGGGAYEQYF	TGTGCCAGCAGTGGCGGGGGGGCCTACGAGCAGTACTTC	:::::::::0::12:13::22:22:22::39:::
1331	TGTGCCAGCAGTGGGACAGAGGCCTACGAGCAGTACTTC	TRBV27	TRBD1	TRBJ2-7	TRBV27*00	TRBJ2	CASSGTEAYEQYF	TGTGCCAGCAGTGGGACAGAGGCCTACGAGCAGTACTTC	:::::::::0::12:12:12::22:22::39:::
1332	TGTGCCAGCAGTGGGGGACAGGGCTATGGCTACACCTTC	TRBV6-1	TRBD1	TRBJ1-2	TRBV6	TRBJ1	CASSGGQGYGYTF	TGTGCCAGCAGTGGGGGACAGGGCTATGGCTACACCTTC	:::::::::0::13:14:14::23:23::39:::
1333	TGTGCCAGCAGTGGGGGACAGGGGTACAATGAGCAGTTCTTC	TRBV9	TRBD1	TRBJ2-1	TRBV9*00	TRBJ2	CASSGGQGYNEQFF	TGTGCCAGCAGTGGGGGACAGGGGTACAATGAGCAGTTCTTC	:::::::::0::11:14:14::24:24::42:::
1334	TGTGCCAGCAGTGGGGGGACGGTTGCCTACGAGCAGTACTTC	TRBV6-2	TRBD1	TRBJ2-7	TRBV6	TRBJ2	CASSGGTVAYEQYF	TGTGCCAGCAGTGGGGGGACGGTTGCCTACGAGCAGTACTTC	:::::::::0::12:15:15::20:25::42:::
1335	TGTGCCAGCAGTGTAGCGGGGGACTCCTACGAGCAGTACTTC	TRBV2		TRBJ2-7	TRBV2*00	TRBJ2	CASSVAGDSYEQYF	TGTGCCAGCAGTGTAGCGGGGGACTCCTACGAGCAGTACTTC	:::::::::0:17:18:::::20:23:42:::
1336	TGTGCCAGCAGTGTCGGCGGTATCCCTAACTATGGCTACACCTTC	TRBV13		TRBJ1-2	TRBV13*00	TRBJ1	CASSVGGIPNYGYTF	TGTGCCAGCAGTGTCGGCGGTATCCCTAACTATGGCTACACCTTC	:::::::::0::11:::::25:25:45:::
1337	TGTGCCAGCAGTGTGGTAGGGACAGGGGCCTACGAGCAGTACGTC	TRBV2	TRBD1	TRBJ2-7	TRBV2*00	TRBJ2	CASSVVGTGAYEQYV	TGTGCCAGCAGTGTGGTAGGGACAGGGGCCTACGAGCAGTACGTC	:::::::::0::13:18:18::28:28::45:::
1338	TGTGCCAGCAGTGTTCGGGGAGGGAATGAGCAGTTCTTC	TRBV2	TRBD2	TRBJ2-1	TRBV2*00	TRBJ2	CASSVRGGNEQFF	TGTGCCAGCAGTGTTCGGGGAGGGAATGAGCAGTTCTTC	:::::::::0::13:17::24:24:24::39:::
1339	TGTGCCAGCAGTTACAAGGTTAACAATGAGCAGTTCTTC	TRBV6-5		TRBJ2-1	TRBV6	TRBJ2	CASSYKVNNEQFF	TGTGCCAGCAGTTACAAGGTTAACAATGAGCAGTTCTTC	:::::::::0::15:::::22::39:::
1340	TGTGCCAGCAGTTACACAGGGGCCTACGAGCAGTACGTC	TRBV6-2	TRBD1	TRBJ2-7	TRBV6	TRBJ2	CASSYTGAYEQYV	TGTGCCAGCAGTTACACAGGGGCCTACGAGCAGTACGTC	:::::::::0::15:15:::22:22::39:::
1341	TGTGCCAGCAGTTACACGGAAGCCTACGAGCAGTACTTC	TRBV6-2		TRBJ2-7	TRBV6	TRBJ2	CASSYTEAYEQYF	TGTGCCAGCAGTTACACGGAAGCCTACGAGCAGTACTTC	:::::::::0:17:18:::::22::39:::
1342	TGTGCCAGCAGTTACACGGTTAACAATGAGCAGTTCTTC	TRBV6-5		TRBJ2-1	TRBV6	TRBJ2	CASSYTVNNEQFF	TGTGCCAGCAGTTACACGGTTAACAATGAGCAGTTCTTC	:::::::::0:17:24:::::22::39:::
1343	TGTGCCAGCAGTTACACGGTTGGTGCGACCCAGTACTTC	TRBV6-2		TRBJ2-5	TRBV6	TRBJ2	CASSYTVGATQYF	TGTGCCAGCAGTTACACGGTTGGTGCGACCCAGTACTTC	:::::::::0:17:18:::::26::39:::
1344	TGTGCCAGCAGTTACATCGGGGGGGAGACTAAGAGGGCAAACTATGGCTACACCTTC	TRBV6-5	TRBD1	TRBJ1-2	TRBV6	TRBJ1	CASSYIGGETKRANYGYTF	TGTGCCAGCAGTTACATCGGGGGGGAGACTAAGAGGGCAAACTATGGCTACACCTTC	:::::::::0:18:19:19:::24:36:37:57:::
1345	TGTGCCAGCAGTTACCCCGGGACGGCCTATGGCTACACCTTC	TRBV6-2	TRBD1	TRBJ1-2	TRBV6	TRBJ1	CASSYPGTAYGYTF	TGTGCCAGCAGTTACCCCGGGACGGCCTATGGCTACACCTTC	:::::::::0::15:15:18::23:26::42:::
1346	TGTGCCAGCAGTTACCCGAAACAGCCCCAGCATTTT	TRBV6-2		TRBJ1-5	TRBV6	TRBJ1	CASSYPKQPQHF	TGTGCCAGCAGTTACCCGAAACAGCCCCAGCATTTT	:::::::::0:17:19:::::18::36:::
1347	TGTGCCAGCAGTTACCTACAGACCGCCAACTACGAGCAGTACTTC	TRBV6-5		TRBJ2-7	TRBV6	TRBJ2	CASSYLQTANYEQYF	TGTGCCAGCAGTTACCTACAGACCGCCAACTACGAGCAGTACTTC	:::::::::0::15:::::29::45:::
1348	TGTGCCAGCAGTTACCTCGAGACAGGGTCCTACGAGCAGTACTTC	TRBV6-5	TRBD1	TRBJ2-7	TRBV6	TRBJ2	CASSYLETGSYEQYF	TGTGCCAGCAGTTACCTCGAGACAGGGTCCTACGAGCAGTACTTC	:::::::::0:18:21:21:::27:27::45:::
1349	TGTGCCAGCAGTTACCTCGGGACTAGTCTCTACGAGCAGTACGTC	TRBV6-2	TRBD2	TRBJ2-7	TRBV6	TRBJ2	CASSYLGTSLYEQYV	TGTGCCAGCAGTTACCTCGGGACTAGTCTCTACGAGCAGTACGTC	:::::::::0:18:19:19:::26:29::45:::
1350	TGTGCCAGCAGTTACGCACTTAATCAGCCCCAGCATTTT	TRBV6-2		TRBJ1-5	TRBV6	TRBJ1	CASSYALNQPQHF	TGTGCCAGCAGTTACGCACTTAATCAGCCCCAGCATTTT	:::::::::0::15:::::21::39:::
1351	TGTGCCAGCAGTTACGCCGGGACAGCCTACGAGCAGTACTTC	TRBV6-5	TRBD1	TRBJ2-7	TRBV6	TRBJ2	CASSYAGTAYEQYF	TGTGCCAGCAGTTACGCCGGGACAGCCTACGAGCAGTACTTC	:::::::::0::15:16:18::25:25::42:::
1352	TGTGCCAGCAGTTACGCGGGGGCCTATGGCTACACCTTC	TRBV6-5	TRBD1	TRBJ1-2	TRBV6	TRBJ1	CASSYAGAYGYTF	TGTGCCAGCAGTTACGCGGGGGCCTATGGCTACACCTTC	:::::::::0:17:18:18::23:23:23::39:::
1353	TGTGCCAGCAGTTACGGGACAGCCTACGAGCAGTACTTC	TRBV6-2	TRBD1	TRBJ2-7	TRBV6	TRBJ2	CASSYGTAYEQYF	TGTGCCAGCAGTTACGGGACAGCCTACGAGCAGTACTTC	:::::::::0::15:15:15::22:22::39:::
1354	TGTGCCAGCAGTTACGGGACAGCCTGCGAGCAGTACTTC	TRBV6-2	TRBD1	TRBJ2-7	TRBV6	TRBJ2	CASSYGTACEQYF	TGTGCCAGCAGTTACGGGACAGCCTGCGAGCAGTACTTC	:::::::::0::15:15:15::22:22::39:::
1355	TGTGCCAGCAGTTACGGGACAGCGTATGGCTACAACTTC	TRBV6-2	TRBD1	TRBJ1-2	TRBV6	TRBJ1	CASSYGTAYGYNF	TGTGCCAGCAGTTACGGGACAGCGTATGGCTACAACTTC	:::::::::0::15:15:15::22:24::39:::
1356	TGTGCCAGCAGTTACGGGACAGCGTATGGCTACACCTTC	TRBV6-2	TRBD1	TRBJ1-2	TRBV6	TRBJ1	CASSYGTAYGYTF	TGTGCCAGCAGTTACGGGACAGCGTATGGCTACACCTTC	:::::::::0::15:15:15::22:24::39:::
1357	TGTGCCAGCAGTTACGGGACATCGTATGGCTACACCTTC	TRBV6-2	TRBD1	TRBJ1-2	TRBV6	TRBJ1	CASSYGTSYGYTF	TGTGCCAGCAGTTACGGGACATCGTATGGCTACACCTTC	:::::::::0::15:15:15::21:24::39:::
1358	TGTGCCAGCAGTTACGGGGACAGCTACGAGCAGTACTTC	TRBV6-2	TRBD1	TRBJ2-7	TRBV6	TRBJ2	CASSYGDSYEQYF	TGTGCCAGCAGTTACGGGGACAGCTACGAGCAGTACTTC	:::::::::0::15:16:16::23:23::39:::
1359	TGTGCCAGCAGTTACGGGGTCTCGGGACAGTTCTATGGCTACACCTTC	TRBV6-2	TRBD1	TRBJ1-2	TRBV6	TRBJ1	CASSYGVSGQFYGYTF	TGTGCCAGCAGTTACGGGGTCTCGGGACAGTTCTATGGCTACACCTTC	:::::::::0::15:18:23::30:32::48:::
1360	TGTGCCAGCAGTTACTCAACCGCCGCCTACGAGCAGTACTTC	TRBV6-2		TRBJ2-7	TRBV6	TRBJ2	CASSYSTAAYEQYF	TGTGCCAGCAGTTACTCAACCGCCGCCTACGAGCAGTACTTC	:::::::::0:17:17:::::25::42:::
1361	TGTGCCAGCAGTTACTCCGACGGGTACACCGGGGAGCTGTTTTTT	TRBV6-5		TRBJ2-2	TRBV6	TRBJ2	CASSYSDGYTGELFF	TGTGCCAGCAGTTACTCCGACGGGTACACCGGGGAGCTGTTTTTT	:::::::::0:17:17:::::25::45:::
1362	TGTGCCAGCAGTTACTCCGAGGGCGGGGGGCGGGATACGCAGTATTTT	TRBV6-5	TRBD1	TRBJ2-3	TRBV6	TRBJ2	CASSYSEGGGRDTQYF	TGTGCCAGCAGTTACTCCGAGGGCGGGGGGCGGGATACGCAGTATTTT	:::::::::0:18:21:25::31:32:33::48:::
1363	TGTGCCAGCAGTTACTCCGGGACTAGCGGGGGGGCTTACGAGCAGTACTTC	TRBV6-5	TRBD2	TRBJ2-7	TRBV6	TRBJ2	CASSYSGTSGGAYEQYF	TGTGCCAGCAGTTACTCCGGGACTAGCGGGGGGGCTTACGAGCAGTACTTC	:::::::::0:17:17:17:18:34:35:36::51:::
1364	TGTGCCAGCAGTTACTCCGGGGGCGGGGGGCGGGATACGCAGTATTTT	TRBV6-5	TRBD1	TRBJ2-3	TRBV6	TRBJ2	CASSYSGGGGRDTQYF	TGTGCCAGCAGTTACTCCGGGGGCGGGGGGCGGGATACGCAGTATTTT	:::::::::0:17:17:19:19:31:32:33::48:::
1365	TGTGCCAGCAGTTACTCGACCGCCTACGAGCAGTACTTC	TRBV6-2		TRBJ2-7	TRBV6	TRBJ2	CASSYSTAYEQYF	TGTGCCAGCAGTTACTCGACCGCCTACGAGCAGTACTTC	:::::::::0:17:19:::::22::39:::
1366	TGTGCCAGCAGTTACTCGACCGCCTACGAGCATTACTTC	TRBV6-2		TRBJ2-7	TRBV6	TRBJ2	CASSYSTAYEHYF	TGTGCCAGCAGTTACTCGACCGCCTACGAGCATTACTTC	:::::::::0:17:19:::::22::39:::
1367	TGTGCCAGCAGTTACTCGAGGACAGGCGCCTATGGCTACACCTTC	TRBV6-5	TRBD1	TRBJ1-2	TRBV6	TRBJ1	CASSYSRTGAYGYTF	TGTGCCAGCAGTTACTCGAGGACAGGCGCCTATGGCTACACCTTC	:::::::::0:17:20:20:::26:29::45:::
1368	TGTGCCAGCAGTTACTCGATTGCGGGGGCTTCCTACGAGCAGTACTTC	TRBV6-6	TRBD1	TRBJ2-7	TRBV6	TRBJ2	CASSYSIAGASYEQYF	TGTGCCAGCAGTTACTCGATTGCGGGGGCTTCCTACGAGCAGTACTTC	:::::::::0:17:19:23::29:29:30::48:::
1369	TGTGCCAGCAGTTACTCGCCAGGGGGTGCCTCACCCCTCCACTTT	TRBV6-5	TRBD1	TRBJ1-6	TRBV6	TRBJ1	CASSYSPGGASPLHF	TGTGCCAGCAGTTACTCGCCAGGGGGTGCCTCACCCCTCCACTTT	:::::::::0:17:18:19::27:30:30::45:::
1370	TGTGCCAGCAGTTACTCGCCAGGGGGTGCCTCCCCCCTCCACTTT	TRBV6-5	TRBD1	TRBJ1-6	TRBV6	TRBJ1	CASSYSPGGASPLHF	TGTGCCAGCAGTTACTCGCCAGGGGGTGCCTCCCCCCTCCACTTT	:::::::::0:17:18:19::27:30:30::45:::
1371	TGTGCCAGCAGTTACTCGGGAGACCCTGAAGCTTTCTTT	TRBV6-5		TRBJ1-1	TRBV6	TRBJ1	CASSYSGDPEAFF	TGTGCCAGCAGTTACTCGGGAGACCCTGAAGCTTTCTTT	:::::::::0:17:18:::::22::39:::
1372	TGTGCCAGCAGTTACTCGGGGGGGTACGAGCAGTACGTC	TRBV6-2	TRBD1	TRBJ2-7	TRBV6	TRBJ2	CASSYSGGYEQYV	TGTGCCAGCAGTTACTCGGGGGGGTACGAGCAGTACGTC	:::::::::0:17:18:18:::23:24::39:::
1373	TGTGCCAGCAGTTACTCGGGTACAGGGGTCTATGGCTACACCTTC	TRBV6-5	TRBD1	TRBJ1-2	TRBV6	TRBJ1	CASSYSGTGVYGYTF	TGTGCCAGCAGTTACTCGGGTACAGGGGTCTATGGCTACACCTTC	:::::::::0:17:22:22:::28:29::45:::
1374	TGTGCCAGCAGTTACTCGTCGACTGGGGCCTACGAGCAGTACTTC	TRBV6-5	TRBD1	TRBJ2-7	TRBV6	TRBJ2	CASSYSSTGAYEQYF	TGTGCCAGCAGTTACTCGTCGACTGGGGCCTACGAGCAGTACTTC	:::::::::0:17:18:20:::28:28::45:::
1375	TGTGCCAGCAGTTACTCGTCTGCTGGGTATGGCTACACCTTC	TRBV6-5		TRBJ1-2	TRBV6	TRBJ1	CASSYSSAGYGYTF	TGTGCCAGCAGTTACTCGTCTGCTGGGTATGGCTACACCTTC	:::::::::0:17:18:::::27::42:::
1376	TGTGCCAGCAGTTACTGGGGTTCGGGTTCTGAGCAGTTCTTC	TRBV6-2		TRBJ2-1	TRBV6	TRBJ2	CASSYWGSGSEQFF	TGTGCCAGCAGTTACTGGGGTTCGGGTTCTGAGCAGTTCTTC	:::::::::0::16:::::29::42:::
1377	TGTGCCAGCAGTTACTTAACAGGGGGAACAGGTGAAGCTTTCTTT	TRBV6-3	TRBD1	TRBJ1-1	TRBV6	TRBJ1	CASSYLTGGTGEAFF	TGTGCCAGCAGTTACTTAACAGGGGGAACAGGTGAAGCTTTCTTT	:::::::::0::16:18:::25:25::45:::
1378	TGTGCCAGCAGTTATCCCAATCAGCCCCAGCATTTT	TRBV12-3		TRBJ1-5	TRBV12	TRBJ1	CASSYPNQPQHF	TGTGCCAGCAGTTATCCCAATCAGCCCCAGCATTTT	:::::::::0::13:::::17::36:::
1379	TGTGCCAGCAGTTATTCGGACGGTGGCACCGGGGAGCTGTTTTTT	TRBV6-5		TRBJ2-2	TRBV6	TRBJ2	CASSYSDGGTGELFF	TGTGCCAGCAGTTATTCGGACGGTGGCACCGGGGAGCTGTTTTTT	:::::::::0:17:18:::::26::45:::
1380	TGTGCCAGCAGTTATTCGGCCGGTGGCACCGGGGAGCTGTTTTTT	TRBV6-5		TRBJ2-2	TRBV6	TRBJ2	CASSYSAGGTGELFF	TGTGCCAGCAGTTATTCGGCCGGTGGCACCGGGGAGCTGTTTTTT	:::::::::0:17:18:::::26::45:::
1381	TGTGCCAGCAGTTCACAGGGGCCGGCCTATGGCTACACCTTC	TRBV6-5	TRBD1	TRBJ1-2	TRBV6	TRBJ1	CASSSQGPAYGYTF	TGTGCCAGCAGTTCACAGGGGCCGGCCTATGGCTACACCTTC	:::::::::0::13:14::23:24:26::42:::
1382	TGTGCCAGCAGTTCACAGGGGGCATATGGCTACACCTTC	TRBV6-5	TRBD1	TRBJ1-2	TRBV6	TRBJ1	CASSSQGAYGYTF	TGTGCCAGCAGTTCACAGGGGGCATATGGCTACACCTTC	:::::::::0::13:14::23:23:24::39:::
1383	TGTGCCAGCAGTTCAGGACTAGCCTACGAGCAGTACTTC	TRBV12-3	TRBD2	TRBJ2-7	TRBV12	TRBJ2	CASSSGLAYEQYF	TGTGCCAGCAGTTCAGGACTAGCCTACGAGCAGTACTTC	:::::::::0::16:16:::22:22::39:::
1384	TGTGCCAGCAGTTCCGGAATCTATGGCTACACCTTC	TRBV28		TRBJ1-2	TRBV28*00	TRBJ1	CASSSGIYGYTF	TGTGCCAGCAGTTCCGGAATCTATGGCTACACCTTC	:::::::::0::13:::::20::36:::
1385	TGTGCCAGCAGTTCCGGACTAGCCGGGGAGCTGTTTTTT	TRBV6-2	TRBD2	TRBJ2-2	TRBV6	TRBJ2	CASSSGLAGELFF	TGTGCCAGCAGTTCCGGACTAGCCGGGGAGCTGTTTTTT	:::::::::0::13:15:::22:22::39:::
1386	TGTGCCAGCAGTTCCGGGACAGAGGCCTACGAGCAGTACTTC	TRBV6-2	TRBD1	TRBJ2-7	TRBV6	TRBJ2	CASSSGTEAYEQYF	TGTGCCAGCAGTTCCGGGACAGAGGCCTACGAGCAGTACTTC	:::::::::0::13:13:15::25:25::42:::
1387	TGTGCCAGCAGTTCCGGGACAGCCTACGAGCAGTACGTC	TRBV6-2	TRBD1	TRBJ2-7	TRBV6	TRBJ2	CASSSGTAYEQYV	TGTGCCAGCAGTTCCGGGACAGCCTACGAGCAGTACGTC	:::::::::0::13:13:15::22:22::39:::
1388	TGTGCCAGCAGTTCCGGGACAGCCTACGAGCAGTACTTC	TRBV28	TRBD1	TRBJ2-7	TRBV28*00	TRBJ2	CASSSGTAYEQYF	TGTGCCAGCAGTTCCGGGACAGCCTACGAGCAGTACTTC	:::::::::0::13:13:15::22:22::39:::
1389	TGTGCCAGCAGTTCCGGGGGGGCCGCCTACGAGCAGTACGTC	TRBV6-5	TRBD2	TRBJ2-7	TRBV6	TRBJ2	CASSSGGAAYEQYV	TGTGCCAGCAGTTCCGGGGGGGCCGCCTACGAGCAGTACGTC	:::::::::0::13:14::22:24:25::42:::
1390	TGTGCCAGCAGTTCCTCCCCCGGGGGTAGCTCCTACGAGCAGTACTTC	TRBV27	TRBD1	TRBJ2-7	TRBV27*00	TRBJ2	CASSSSPGGSSYEQYF	TGTGCCAGCAGTTCCTCCCCCGGGGGTAGCTCCTACGAGCAGTACTTC	:::::::::0::13:18:21::24:27:29:48:::
1391	TGTGCCAGCAGTTCCTCCGGGACAGGCTCCTACGAGCAGTACTTC	TRBV27	TRBD1	TRBJ2-7	TRBV27*00	TRBJ2	CASSSSGTGSYEQYF	TGTGCCAGCAGTTCCTCCGGGACAGGCTCCTACGAGCAGTACTTC	:::::::::0::13:16:18::25:25:26:45:::
1392	TGTGCCAGCAGTTCGACAGGGGCCTACGAGCAGTACTTC	TRBV27	TRBD1	TRBJ2-7	TRBV27*00	TRBJ2	CASSSTGAYEQYF	TGTGCCAGCAGTTCGACAGGGGCCTACGAGCAGTACTTC	:::::::::0::13:14:::22:22::39:::
1393	TGTGCCAGCAGTTCGGCAGGGGGTTACGAGCAGTACTTC	TRBV27	TRBD1	TRBJ2-7	TRBV27*00	TRBJ2	CASSSAGGYEQYF	TGTGCCAGCAGTTCGGCAGGGGGTTACGAGCAGTACTTC	:::::::::0::13:16:::23:24::39:::
1394	TGTGCCAGCAGTTCGGCGGGGGGCTACGAGCAGTACGTC	TRBV6-2	TRBD2	TRBJ2-7	TRBV6	TRBJ2	CASSSAGGYEQYV	TGTGCCAGCAGTTCGGCGGGGGGCTACGAGCAGTACGTC	:::::::::0::13:15::23:23:23::39:::
1395	TGTGCCAGCAGTTCGGGACAGGGGGCCTCCTACGAGCAGTACTTC	TRBV27	TRBD1	TRBJ2-7	TRBV27*00	TRBJ2	CASSSGQGASYEQYF	TGTGCCAGCAGTTCGGGACAGGGGGCCTCCTACGAGCAGTACTTC	:::::::::0::13:13:14:26:26:26:26:45:::
1396	TGTGCCAGCAGTTCGGGACTAGCCTACGAGCAGTACTTC	TRBV6-2	TRBD2	TRBJ2-7	TRBV6	TRBJ2	CASSSGLAYEQYF	TGTGCCAGCAGTTCGGGACTAGCCTACGAGCAGTACTTC	:::::::::0::13:13:14::22:22::39:::
1397	TGTGCCAGCAGTTCGGGAGGACAGGGGTATGGCTACACCTTC	TRBV6-5	TRBD1	TRBJ1-2	TRBV6	TRBJ1	CASSSGGQGYGYTF	TGTGCCAGCAGTTCGGGAGGACAGGGGTATGGCTACACCTTC	:::::::::0::13:18:::27:27::42:::
1398	TGTGCCAGCAGTTCGGGGACAGTATCCTACGAGCAGTACTTC	TRBV6-2	TRBD1	TRBJ2-7	TRBV6	TRBJ2	CASSSGTVSYEQYF	TGTGCCAGCAGTTCGGGGACAGTATCCTACGAGCAGTACTTC	:::::::::0::13:15:15::22:24::42:::
1399	TGTGCCAGCAGTTCGTCCGGGACAGGGGGCTATGGCTACACCTTC	TRBV6-2	TRBD1	TRBJ1-2	TRBV6	TRBJ1	CASSSSGTGGYGYTF	TGTGCCAGCAGTTCGTCCGGGACAGGGGGCTATGGCTACACCTTC	:::::::::0::13:16:18::29:29::45:::
1400	TGTGCCAGCAGTTCGTGGGGGGGGGATACGCAGTATTTT	TRBV12-4	TRBD1	TRBJ2-3	TRBV12	TRBJ2	CASSSWGGDTQYF	TGTGCCAGCAGTTCGTGGGGGGGGGATACGCAGTATTTT	:::::::::0::13:16:::21:24::39:::
1401	TGTGCCAGCAGTTCTAGCGGGGGATACGAGCAGTACGTC	TRBV6-2	TRBD2	TRBJ2-7	TRBV6	TRBJ2	CASSSSGGYEQYV	TGTGCCAGCAGTTCTAGCGGGGGATACGAGCAGTACGTC	:::::::::0::13:13:::21:24::39:::
1402	TGTGCCAGCAGTTCTCCGGGACCCATCTATGGCTACACCTTC	TRBV28	TRBD1	TRBJ1-2	TRBV28*00	TRBJ1	CASSSPGPIYGYTF	TGTGCCAGCAGTTCTCCGGGACCCATCTATGGCTACACCTTC	:::::::::0::13:15:17::22:26::42:::
1403	TGTGCCAGCAGTTCTGGACGTGGGGGGGGCAGCACAGATACGCAGTATTTT	TRBV27	TRBD1	TRBJ2-3	TRBV27*00	TRBJ2	CASSSGRGGGSTDTQYF	TGTGCCAGCAGTTCTGGACGTGGGGGGGGCAGCACAGATACGCAGTATTTT	:::::::::0::13:24::30:30:30:30:51:::
1404	TGTGCCAGCAGTTCTGGATTTGCATTTACGCAGTATTTT	TRBV27		TRBJ2-3	TRBV27*00	TRBJ2	CASSSGFAFTQYF	TGTGCCAGCAGTTCTGGATTTGCATTTACGCAGTATTTT	:::::::::0::13:::::26::39:::
1405	TGTGCCAGCAGTTCTGGCCCCGGACAGGCCCTCGGCTACACCTTC	TRBV27	TRBD1	TRBJ1-2	TRBV27*00	TRBJ1	CASSSGPGQALGYTF	TGTGCCAGCAGTTCTGGCCCCGGACAGGCCCTCGGCTACACCTTC	:::::::::0::13:13:20::28:33::45:::
1406	TGTGCCAGCAGTTCTGGGACTAGCGGAGCCTACGAGCAGTACTTC	TRBV6-5	TRBD2	TRBJ2-7	TRBV6	TRBJ2	CASSSGTSGAYEQYF	TGTGCCAGCAGTTCTGGGACTAGCGGAGCCTACGAGCAGTACTTC	:::::::::0::13:15:15::26:28::45:::
1407	TGTGCCAGCAGTTGGACCGGGACAGGGGCCTATGGCTACACCTTC	TRBV12-4	TRBD1	TRBJ1-2	TRBV12	TRBJ1	CASSWTGTGAYGYTF	TGTGCCAGCAGTTGGACCGGGACAGGGGCCTATGGCTACACCTTC	:::::::::0::13:16:18::28:29::45:::
1408	TGTGCCAGCAGTTGGGATCGACAGCTTGGGGCCAACGTCCTGACTTTC	TRBV5-4		TRBJ2-6	TRBV5	TRBJ2	CASSWDRQLGANVLTF	TGTGCCAGCAGTTGGGATCGACAGCTTGGGGCCAACGTCCTGACTTTC	:::::::::0:15:15:::::22:24:48:::
1409	TGTGCCAGCAGTTTAAATGCCGAGTCTAGCGGCTACACCTGC	TRBV27	TRBD2	TRBJ1-2	TRBV27*00	TRBJ1	CASSLNAESSGYTC	TGTGCCAGCAGTTTAAATGCCGAGTCTAGCGGCTACACCTGC	:::::::::0::15:19:21::30:30::42:::
1410	TGTGCCAGCAGTTTAAATGCCGAGTCTAGCGGCTACACCTTC	TRBV27	TRBD2	TRBJ1-2	TRBV27*00	TRBJ1	CASSLNAESSGYTF	TGTGCCAGCAGTTTAAATGCCGAGTCTAGCGGCTACACCTTC	:::::::::0::15:19:21::30:30::42:::
1411	TGTGCCAGCAGTTTAATACAGGGGGCCGATGAGCAGTTCTTC	TRBV6-4	TRBD1	TRBJ2-1	TRBV6	TRBJ2	CASSLIQGADEQFF	TGTGCCAGCAGTTTAATACAGGGGGCCGATGAGCAGTTCTTC	:::::::::0::12:17::26:26:28::42:::
1412	TGTGCCAGCAGTTTACAGGGATCTGGGTCCCACACAGATACGCAGTATTTT	TRBV27	TRBD1	TRBJ2-3	TRBV27*00	TRBJ2	CASSLQGSGSHTDTQYF	TGTGCCAGCAGTTTACAGGGATCTGGGTCCCACACAGATACGCAGTATTTT	:::::::::0::15:26:31::31:32::51:::
1413	TGTGCCAGCAGTTTACAGGGGGCGGGTGGAAACACCATATATTTT	TRBV12-3	TRBD1	TRBJ1-3	TRBV12	TRBJ1	CASSLQGAGGNTIYF	TGTGCCAGCAGTTTACAGGGGGCGGGTGGAAACACCATATATTTT	:::::::::0::15:15::23:24:26::45:::
1414	TGTGCCAGCAGTTTACCCAATCAGCCCGATCATTTT	TRBV12-3		TRBJ1-5	TRBV12	TRBJ1	CASSLPNQPDHF	TGTGCCAGCAGTTTACCCAATCAGCCCGATCATTTT	:::::::::0::15:::::17::36:::
1415	TGTGCCAGCAGTTTAGAGGGGTTTCAAGAGACCCAGTACTTC	TRBV12-4	TRBD1	TRBJ2-5	TRBV12	TRBJ2	CASSLEGFQETQYF	TGTGCCAGCAGTTTAGAGGGGTTTCAAGAGACCCAGTACTTC	:::::::::0::16:16:::21:24::42:::
1416	TGTGCCAGCAGTTTAGCCCCCCTGGCCCAGGCGAACATTCAGTACTTC	TRBV12-3	TRBD1	TRBJ2-4	TRBV12	TRBJ2	CASSLAPLAQANIQYF	TGTGCCAGCAGTTTAGCCCCCCTGGCCCAGGCGAACATTCAGTACTTC	:::::::::0:17:17:17:28::31:33::48:::
1417	TGTGCCAGCAGTTTAGGCGGACAGGCGGGGGAGACCCAGTACTTC	TRBV12-4	TRBD1	TRBJ2-5	TRBV12	TRBJ2	CASSLGGQAGETQYF	TGTGCCAGCAGTTTAGGCGGACAGGCGGGGGAGACCCAGTACTTC	:::::::::0::16:18:::29:30::45:::
1418	TGTGCCAGCAGTTTAGGCGGACAGGGGTTTAATTCACCCCTCCACTTT	TRBV27	TRBD1	TRBJ1-6	TRBV27*00	TRBJ1	CASSLGGQGFNSPLHF	TGTGCCAGCAGTTTAGGCGGACAGGGGTTTAATTCACCCCTCCACTTT	:::::::::0::15:18:::27:29::48:::
1419	TGTGCCAGCAGTTTAGGGGACAGCCGAGAGACCCAGTACTTC	TRBV27	TRBD1	TRBJ2-5	TRBV27*00	TRBJ2	CASSLGDSRETQYF	TGTGCCAGCAGTTTAGGGGACAGCCGAGAGACCCAGTACTTC	:::::::::0::15:16:16::23:23::42:::
1420	TGTGCCAGCAGTTTATACCCCGAATATGGCTACACCTTC	TRBV27		TRBJ1-2	TRBV27*00	TRBJ1	CASSLYPEYGYTF	TGTGCCAGCAGTTTATACCCCGAATATGGCTACACCTTC	:::::::::0::16:::::24::39:::
1421	TGTGCCAGCAGTTTATCGACGGGGGGCCTCACCGGGGAGCTGTTTTTT	TRBV27	TRBD2	TRBJ2-2	TRBV27*00	TRBJ2	CASSLSTGGLTGELFF	TGTGCCAGCAGTTTATCGACGGGGGGCCTCACCGGGGAGCTGTTTTTT	:::::::::0:17:19:19::26:28:29::48:::
1422	TGTGCCAGCAGTTTATTAGGGACAGGGGCGAACACCGGGGAGCTGTTTTTT	TRBV27	TRBD1	TRBJ2-2	TRBV27*00	TRBJ2	CASSLLGTGANTGELFF	TGTGCCAGCAGTTTATTAGGGACAGGGGCGAACACCGGGGAGCTGTTTTTT	:::::::::0::16:18:18::27:27:28:51:::
1423	TGTGCCAGCAGTTTCAGAACAGGGGGGACAGATACGCAGTATTTT	TRBV27	TRBD1	TRBJ2-3	TRBV27*00	TRBJ2	CASSFRTGGTDTQYF	TGTGCCAGCAGTTTCAGAACAGGGGGGACAGATACGCAGTATTTT	:::::::::0::14:18:::26:27::45:::
1424	TGTGCCAGCAGTTTCATACCCGGGGGCAATCAGCCCCAGCATTTT	TRBV28	TRBD1	TRBJ1-5	TRBV28*00	TRBJ1	CASSFIPGGNQPQHF	TGTGCCAGCAGTTTCATACCCGGGGGCAATCAGCCCCAGCATTTT	:::::::::0::14:18:21::24:25::45:::
1425	TGTGCCAGCAGTTTCCAGGGCTCCTACGAGCAGTACGTC	TRBV12-3		TRBJ2-7	TRBV12	TRBJ2	CASSFQGSYEQYV	TGTGCCAGCAGTTTCCAGGGCTCCTACGAGCAGTACGTC	:::::::::0::14:::::16:20:39:::
1426	TGTGCCAGCAGTTTCCTCGGGACTGGAGCCTACGAGCAGTACTTC	TRBV6-5	TRBD2	TRBJ2-7	TRBV6	TRBJ2	CASSFLGTGAYEQYF	TGTGCCAGCAGTTTCCTCGGGACTGGAGCCTACGAGCAGTACTTC	:::::::::0::13:13:18::24:28::45:::
1427	TGTGCCAGCAGTTTCGGCAGGGCCTACGAGCAGTACGTC	TRBV28	TRBD2	TRBJ2-7	TRBV28*00	TRBJ2	CASSFGRAYEQYV	TGTGCCAGCAGTTTCGGCAGGGCCTACGAGCAGTACGTC	:::::::::0::14:14::22:22:22::39:::
1428	TGTGCCAGCAGTTTCGGGACCCTAAACACTGAAGCTTTCTTT	TRBV12-4	TRBD1	TRBJ1-1	TRBV12	TRBJ1	CASSFGTLNTEAFF	TGTGCCAGCAGTTTCGGGACCCTAAACACTGAAGCTTTCTTT	:::::::::0::14:14:15::20:24::42:::
1429	TGTGCCAGCAGTTTCTACACCCTGACCTATGGCTACACCTTC	TRBV12-4	TRBD1	TRBJ1-2	TRBV12	TRBJ1	CASSFYTLTYGYTF	TGTGCCAGCAGTTTCTACACCCTGACCTATGGCTACACCTTC	:::::::::0::14:19:::24:26::42:::
1430	TGTGCCAGCAGTTTCTCAGGGGGAGACGCCTACGAGCAGTACTTC	TRBV27		TRBJ2-7	TRBV27*00	TRBJ2	CASSFSGGDAYEQYF	TGTGCCAGCAGTTTCTCAGGGGGAGACGCCTACGAGCAGTACTTC	:::::::::0:17:17:::::21:26:45:::
1431	TGTGCCAGCAGTTTGACCGCGACGACCTACAATGAGCAGTTCTTC	TRBV6-5		TRBJ2-1	TRBV6	TRBJ2	CASSLTATTYNEQFF	TGTGCCAGCAGTTTGACCGCGACGACCTACAATGAGCAGTTCTTC	:::::::::0::13:::::25::45:::
1432	TGTGCCAGCAGTTTGACCGGGACGACCTACAATGAGCAGTTCTTC	TRBV6-5	TRBD1	TRBJ2-1	TRBV6	TRBJ2	CASSLTGTTYNEQFF	TGTGCCAGCAGTTTGACCGGGACGACCTACAATGAGCAGTTCTTC	:::::::::0::13:16:18::23:25::45:::
1433	TGTGCCAGCAGTTTGGGAATCTATGGCTACACCTTC	TRBV28		TRBJ1-2	TRBV28*00	TRBJ1	CASSLGIYGYTF	TGTGCCAGCAGTTTGGGAATCTATGGCTACACCTTC	:::::::::0::14:::::20::36:::
1434	TGTGCCAGCAGTTTGGGGAGCGGGGGGAGCTACAATGAGCAGTTCTTC	TRBV12-3	TRBD2	TRBJ2-1	TRBV12	TRBJ2	CASSLGSGGSYNEQFF	TGTGCCAGCAGTTTGGGGAGCGGGGGGAGCTACAATGAGCAGTTCTTC	:::::::::0::14:18::27:27:29::48:::
1435	TGTGCCAGCAGTTTGGGGCCCTACGAGCAGTACTTC	TRBV12-3	TRBD1	TRBJ2-7	TRBV12	TRBJ2	CASSLGPYEQYF	TGTGCCAGCAGTTTGGGGCCCTACGAGCAGTACTTC	:::::::::0::14:14::19:19:19::36:::
1436	TGTGCCAGCAGTTTGGGGGGGACAGGCACCTACGAGCAGTACTTC	TRBV12-3	TRBD1	TRBJ2-7	TRBV12	TRBJ2	CASSLGGTGTYEQYF	TGTGCCAGCAGTTTGGGGGGGACAGGCACCTACGAGCAGTACTTC	:::::::::0::14:18:18::25:25:26:45:::
1437	TGTGCCAGCAGTTTTAACTCTGGAAACACCATATATTTT	TRBV28		TRBJ1-3	TRBV28*00	TRBJ1	CASSFNSGNTIYF	TGTGCCAGCAGTTTTAACTCTGGAAACACCATATATTTT	:::::::::0::14:::::17:17:39:::
1438	TGTGCCAGCAGTTTTACAGGGAACACTGAAGCTTTCTTT	TRBV27	TRBD1	TRBJ1-1	TRBV27*00	TRBJ1	CASSFTGNTEAFF	TGTGCCAGCAGTTTTACAGGGAACACTGAAGCTTTCTTT	:::::::::0::14:15:::20:20::39:::
1439	TGTGCCAGCAGTTTTCCCAATCAGCCCCAGCATTTT	TRBV12-4		TRBJ1-5	TRBV12	TRBJ1	CASSFPNQPQHF	TGTGCCAGCAGTTTTCCCAATCAGCCCCAGCATTTT	:::::::::0::14:::::17::36:::
1440	TGTGCCAGCAGTTTTCCCAATCAGGACCAGTATTTT	TRBV12-3		TRBJ1-5	TRBV12	TRBJ1	CASSFPNQDQYF	TGTGCCAGCAGTTTTCCCAATCAGGACCAGTATTTT	:::::::::0::14:::::17::36:::
1441	TGTGCCAGCAGTTTTGGATCTGAAGCTTTCTTT	TRBV12-3		TRBJ1-1	TRBV12	TRBJ1	CASSFGSEAFF	TGTGCCAGCAGTTTTGGATCTGAAGCTTTCTTT	:::::::::0::14:::::19::33:::
1442	TGTGCCAGCAGTTTTGGATTCACAGATACGCAGTATTTT	TRBV27		TRBJ2-3	TRBV27*00	TRBJ2	CASSFGFTDTQYF	TGTGCCAGCAGTTTTGGATTCACAGATACGCAGTATTTT	:::::::::0::14:::::20::39:::
1443	TGTGCCAGCAGTTTTGGGGCTAACTATGGCTACACCTTC	TRBV28		TRBJ1-2	TRBV28*00	TRBJ1	CASSFGANYGYTF	TGTGCCAGCAGTTTTGGGGCTAACTATGGCTACACCTTC	:::::::::0::14:::::18:19:39:::
1444	TGTGCCAGCAGTTTTTACAGGGCCACGGATTACACCTTC	TRBV27	TRBD1	TRBJ1-2	TRBV27*00	TRBJ1	CASSFYRATDYTF	TGTGCCAGCAGTTTTTACAGGGCCACGGATTACACCTTC	:::::::::0::14:16:::22:30::39:::
1445	TGTGCCAGCAGTTTTTCGGCGAACACCGGGGAGCTGTTTTTT	TRBV2		TRBJ2-2	TRBV2*00	TRBJ2	CASSFSANTGELFF	TGTGCCAGCAGTTTTTCGGCGAACACCGGGGAGCTGTTTTTT	:::::::::0::12:::::14:19:42:::
1446	TGTGCCAGCAGTTTTTGGGCGAACACAGGGGAGCTGTTTTTT	TRBV2		TRBJ2-2	TRBV2*00	TRBJ2	CASSFWANTGELFF	TGTGCCAGCAGTTTTTGGGCGAACACAGGGGAGCTGTTTTTT	:::::::::0::12:::::18:19:42:::
1447	TGTGCCAGCAGTTTTTGGGCGAACACCGGGGAGCTGTTTTTT	TRBV2		TRBJ2-2	TRBV2*00	TRBJ2	CASSFWANTGELFF	TGTGCCAGCAGTTTTTGGGCGAACACCGGGGAGCTGTTTTTT	:::::::::0::12:::::18:19:42:::
1448	TGTGCCAGCATAGGGCAGGGTCACGGGGAGCTGTTTTTT	TRBV28	TRBD1	TRBJ2-2	TRBV28*00	TRBJ2	CASIGQGHGELFF	TGTGCCAGCATAGGGCAGGGTCACGGGGAGCTGTTTTTT	:::::::::0::10:12:12::20:23::39:::
1449	TGTGCCAGCATCATGGGGAGCGGGGCCTCCTACAATGAGCAGTTCTTC	TRBV21-1	TRBD2	TRBJ2-1	TRBV21	TRBJ2	CASIMGSGASYNEQFF	TGTGCCAGCATCATGGGGAGCGGGGCCTCCTACAATGAGCAGTTCTTC	:::::::::0::13:18:::24:26:26:48:::
1450	TGTGCCAGCATCCGAAGCGCAGCGGGGGGCACTAGCACAGATACGCAGTATTTT	TRBV3-1	TRBD2	TRBJ2-3	TRBV3	TRBJ2	CASIRSAAGGTSTDTQYF	TGTGCCAGCATCCGAAGCGCAGCGGGGGGCACTAGCACAGATACGCAGTATTTT	:::::::::0::17:20::29:30:31:33:54:::
1451	TGTGCCAGCATCCTAGCGGGGTTCTACGAGCAGTACTTC	TRBV6-1	TRBD2	TRBJ2-7	TRBV6	TRBJ2	CASILAGFYEQYF	TGTGCCAGCATCCTAGCGGGGTTCTACGAGCAGTACTTC	:::::::::0::10:12:::20:23::39:::
1452	TGTGCCAGCATGGAGCAGGCCTCCTACGAGCAGTACTTC	TRBV6-1		TRBJ2-7	TRBV6	TRBJ2	CASMEQASYEQYF	TGTGCCAGCATGGAGCAGGCCTCCTACGAGCAGTACTTC	:::::::::0:16:16:::::20:20:39:::
1453	TGTGCCAGCATTCCAAGGATAGCGGAGGAAGGGGGCGGGGAGCTGTTTTTT	TRBV12-3	TRBD2	TRBJ2-2	TRBV12	TRBJ2	CASIPRIAEEGGGELFF	TGTGCCAGCATTCCAAGGATAGCGGAGGAAGGGGGCGGGGAGCTGTTTTTT	:::::::::0::10:16:::28:35::51:::
1454	TGTGCCAGCATTCCAAGGATAGCGGGGGAAGGGGGCGGGGAGCTGTTTTTT	TRBV12-3	TRBD1	TRBJ2-2	TRBV12	TRBJ2	CASIPRIAGEGGGELFF	TGTGCCAGCATTCCAAGGATAGCGGGGGAAGGGGGCGGGGAGCTGTTTTTT	:::::::::0::10:25:25::35:35::51:::
1455	TGTGCCAGCCACAGGGGAATAGCTTACGAGCAGTACTTC	TRBV28	TRBD1	TRBJ2-7	TRBV28*00	TRBJ2	CASHRGIAYEQYF	TGTGCCAGCCACAGGGGAATAGCTTACGAGCAGTACTTC	:::::::::0::9:10:::17:24::39:::
1456	TGTGCCAGCCCCCAAGCCACTGCGTACGAGCAGTACTTC	TRBV4-2		TRBJ2-7	TRBV4	TRBJ2	CASPQATAYEQYF	TGTGCCAGCCCCCAAGCCACTGCGTACGAGCAGTACTTC	:::::::::0::16:::::24::39:::
1457	TGTGCCAGCCCTAGCGGGGAGTCGCCTAGCACAGATACGCAGTATTTT	TRBV9	TRBD2	TRBJ2-3	TRBV9*00	TRBJ2	CASPSGESPSTDTQYF	TGTGCCAGCCCTAGCGGGGAGTCGCCTAGCACAGATACGCAGTATTTT	:::::::::0::9:10:::18:25:27:48:::
1458	TGTGCCAGCCGTTACTCCGAGGGCGGGGGGCGGGATACGCAGTATTTT	TRBV6-8	TRBD1	TRBJ2-3	TRBV6	TRBJ2	CASRYSEGGGRDTQYF	TGTGCCAGCCGTTACTCCGAGGGCGGGGGGCGGGATACGCAGTATTTT	:::::::::0:18:21:25::31:32:33::48:::
1459	TGTGCCAGCGCAGCTTTCGGGACGGCCTATGGCTACACCTTC	TRBV6-1	TRBD2	TRBJ1-2	TRBV6	TRBJ1	CASAAFGTAYGYTF	TGTGCCAGCGCAGCTTTCGGGACGGCCTATGGCTACACCTTC	:::::::::0::9:17::25:26:26::42:::
1460	TGTGCCAGCGCCAAGACAGTTAACAATGAGCAGTTCTTC	TRBV7-8	TRBD1	TRBJ2-1	TRBV7	TRBJ2	CASAKTVNNEQFF	TGTGCCAGCGCCAAGACAGTTAACAATGAGCAGTTCTTC	:::::::::0::9:14:::19:22::39:::
1461	TGTGCCAGCGCCAGCGGGCCGGCCTACGAGCAGTACTTC	TRBV6-2	TRBD2	TRBJ2-7	TRBV6	TRBJ2	CASASGPAYEQYF	TGTGCCAGCGCCAGCGGGCCGGCCTACGAGCAGTACTTC	:::::::::0::9:12:::18:22::39:::
1462	TGTGCCAGCGCCTCCGGGGGCCCCGCCTACGAGCAGTACTTC	TRBV11-2	TRBD1	TRBJ2-7	TRBV11	TRBJ2	CASASGGPAYEQYF	TGTGCCAGCGCCTCCGGGGGCCCCGCCTACGAGCAGTACTTC	:::::::::0::9:15::21:24:25::42:::
1463	TGTGCCAGCGCGGCAGGGCTAAGCTACGAGCAGTACTTC	TRBV6-2	TRBD2	TRBJ2-7	TRBV6	TRBJ2	CASAAGLSYEQYF	TGTGCCAGCGCGGCAGGGCTAAGCTACGAGCAGTACTTC	:::::::::0::9:9::18:19:23::39:::
1464	TGTGCCAGCGGAAGGGGTCCGAATGAGCAGTTCTTC	TRBV2		TRBJ2-1	TRBV2*00	TRBJ2	CASGRGPNEQFF	TGTGCCAGCGGAAGGGGTCCGAATGAGCAGTTCTTC	:::::::::0::14:::::21::36:::
1465	TGTGCCAGCGGACCACAGGGAGCCTACGAGCAGTACTTC	TRBV6-1	TRBD1	TRBJ2-7	TRBV6	TRBJ2	CASGPQGAYEQYF	TGTGCCAGCGGACCACAGGGAGCCTACGAGCAGTACTTC	:::::::::0::9:14:::20:22::39:::
1466	TGTGCCAGCGGAGCTAAAGCCGGGACAGGGGCCTATGGCTACACCTTC	TRBV6-1	TRBD1	TRBJ1-2	TRBV6	TRBJ1	CASGAKAGTGAYGYTF	TGTGCCAGCGGAGCTAAAGCCGGGACAGGGGCCTATGGCTACACCTTC	:::::::::0::9:19:21::31:32::48:::
1467	TGTGCCAGCGGCGGACAGGGGGCCTACGAGCAGTACTTC	TRBV6-2	TRBD1	TRBJ2-7	TRBV6	TRBJ2	CASGGQGAYEQYF	TGTGCCAGCGGCGGACAGGGGGCCTACGAGCAGTACTTC	:::::::::0::9:12:::22:22::39:::
1468	TGTGCCAGCGGCTCAACAGGGAGCAATCAGCCCCAGCATTTT	TRBV6-5	TRBD1	TRBJ1-5	TRBV6	TRBJ1	CASGSTGSNQPQHF	TGTGCCAGCGGCTCAACAGGGAGCAATCAGCCCCAGCATTTT	:::::::::0::9:15:::21:21::42:::
1469	TGTGCCAGCGGGATCACCTCCCTCGGCGCCTACGAGCAGTACTTC	TRBV27	TRBD2	TRBJ2-7	TRBV27*00	TRBJ2	CASGITSLGAYEQYF	TGTGCCAGCGGGATCACCTCCCTCGGCGCCTACGAGCAGTACTTC	:::::::::0::9:16:::22:25:26:45:::
1470	TGTGCCAGCGGTGCGGGGCCTGCCTACGAGCAGTACGTC	TRBV28	TRBD1	TRBJ2-7	TRBV28*00	TRBJ2	CASGAGPAYEQYV	TGTGCCAGCGGTGCGGGGCCTGCCTACGAGCAGTACGTC	:::::::::0::12:14::19:19:22::39:::
1471	TGTGCCAGCGGTGGACAGGGCTCCTACGAGCAGTACGTC	TRBV6-1		TRBJ2-7	TRBV6	TRBJ2	CASGGQGSYEQYV	TGTGCCAGCGGTGGACAGGGCTCCTACGAGCAGTACGTC	:::::::::0::13:::::16:20:39:::
1472	TGTGCCAGCGGTTACGCCGAGGGCGGGGGGCGGGATACGCAGTATTTT	TRBV6-5	TRBD1	TRBJ2-3	TRBV6	TRBJ2	CASGYAEGGGRDTQYF	TGTGCCAGCGGTTACGCCGAGGGCGGGGGGCGGGATACGCAGTATTTT	:::::::::0::15:25::31:32:33::48:::
1473	TGTGCCAGCGTACGGCCGGGTTCGAACACTGAAGCTTTCTTT	TRBV6-1	TRBD1	TRBJ1-1	TRBV6	TRBJ1	CASVRPGSNTEAFF	TGTGCCAGCGTACGGCCGGGTTCGAACACTGAAGCTTTCTTT	:::::::::0::9:15:17::20:23::42:::
1474	TGTGCCAGCGTCCTACAGGGGGCAACTGAAGCTTTCTTT	TRBV28	TRBD1	TRBJ1-1	TRBV28*00	TRBJ1	CASVLQGATEAFF	TGTGCCAGCGTCCTACAGGGGGCAACTGAAGCTTTCTTT	:::::::::0::9:14::23:23:24::39:::
1475	TGTGCCAGCGTCGGCGGGGGTTCCTACGAGCAGTACTTC	TRBV6-1	TRBD1	TRBJ2-7	TRBV6	TRBJ2	CASVGGGSYEQYF	TGTGCCAGCGTCGGCGGGGGTTCCTACGAGCAGTACTTC	:::::::::0::9:15:::20:21::39:::
1476	TGTGCCAGCTCACCGACCGGGACAGGGGCCTACGAGCAGTACTTC	TRBV18	TRBD1	TRBJ2-7	TRBV18*00	TRBJ2	CASSPTGTGAYEQYF	TGTGCCAGCTCACCGACCGGGACAGGGGCCTACGAGCAGTACTTC	:::::::::0:18:20:20:::28:28::45:::
1477	TGTGCCAGCTCACCGGCCGGGACAGGGGCCTATGGCTACACCTTC	TRBV18	TRBD1	TRBJ1-2	TRBV18*00	TRBJ1	CASSPAGTGAYGYTF	TGTGCCAGCTCACCGGCCGGGACAGGGGCCTATGGCTACACCTTC	:::::::::0::14:16:18::28:29::45:::
1478	TGTGCCAGCTCACCGGCGATAGGGACAGCCTACGAGCAGTACTTC	TRBV18	TRBD1	TRBJ2-7	TRBV18*00	TRBJ2	CASSPAIGTAYEQYF	TGTGCCAGCTCACCGGCGATAGGGACAGCCTACGAGCAGTACTTC	:::::::::0::14:21:21::28:28::45:::
1479	TGTGCCAGCTCACCGGGACAGGCCTACGAGCAGTACTTC	TRBV18	TRBD1	TRBJ2-7	TRBV18*00	TRBJ2	CASSPGQAYEQYF	TGTGCCAGCTCACCGGGACAGGCCTACGAGCAGTACTTC	:::::::::0::14:14:14::22:22::39:::
1480	TGTGCCAGCTCACCGGGGGCCGCTTACGAGCAGTACTTC	TRBV18	TRBD1	TRBJ2-7	TRBV18*00	TRBJ2	CASSPGAAYEQYF	TGTGCCAGCTCACCGGGGGCCGCTTACGAGCAGTACTTC	:::::::::0::14:14::20:20:24::39:::
1481	TGTGCCAGCTCACCTCAGGGGGTCTCCTACGAGCAGTACTTC	TRBV18		TRBJ2-7	TRBV18*00	TRBJ2	CASSPQGVSYEQYF	TGTGCCAGCTCACCTCAGGGGGTCTCCTACGAGCAGTACTTC	:::::::::0:17:23:::::23:23:42:::
1482	TGTGCCAGCTCATCGGGACAGGCCTACGAGCAGTACTTC	TRBV18	TRBD1	TRBJ2-7	TRBV18*00	TRBJ2	CASSSGQAYEQYF	TGTGCCAGCTCATCGGGACAGGCCTACGAGCAGTACTTC	:::::::::0::12:13:14::22:22::39:::
1483	TGTGCCAGCTCCTTCACTCTAAACAATGAGCAGTTCTTC	TRBV6-2		TRBJ2-1	TRBV6	TRBJ2	CASSFTLNNEQFF	TGTGCCAGCTCCTTCACTCTAAACAATGAGCAGTTCTTC	:::::::::0::9:::::22::39:::
1484	TGTGCCAGCTCGAGCGGGGGGGCCTACGAGCAGTACTTC	TRBV6-2	TRBD2	TRBJ2-7	TRBV6	TRBJ2	CASSSGGAYEQYF	TGTGCCAGCTCGAGCGGGGGGGCCTACGAGCAGTACTTC	:::::::::0::9:12::22:22:22::39:::
1485	TGTGCCAGCTCTCCTAGCGGGGCCTACGAGCAGTACTTC	TRBV6-2	TRBD2	TRBJ2-7	TRBV6	TRBJ2	CASSPSGAYEQYF	TGTGCCAGCTCTCCTAGCGGGGCCTACGAGCAGTACTTC	:::::::::0::9:13:::21:22::39:::
1486	TGTGCCAGCTGCCAAGGAGGGGCCTACGAGCAGTACTTC	TRBV3-1	TRBD1	TRBJ2-7	TRBV3	TRBJ2	CASCQGGAYEQYF	TGTGCCAGCTGCCAAGGAGGGGCCTACGAGCAGTACTTC	:::::::::0::16:17:::22:22::39:::
1487	TGTGCCAGCTGTTATCCCATTCAGCCCCAGCATTTT	TRBV12-3		TRBJ1-5	TRBV12	TRBJ1	CASCYPIQPQHF	TGTGCCAGCTGTTATCCCATTCAGCCCCAGCATTTT	:::::::::0::13:::::17::36:::
1488	TGTGCCAGCTTAAACCCAGGCTCCTACGAGCAGTACTTC	TRBV6-5		TRBJ2-7	TRBV6	TRBJ2	CASLNPGSYEQYF	TGTGCCAGCTTAAACCCAGGCTCCTACGAGCAGTACTTC	:::::::::0::9:::::19:20:39:::
1489	TGTGCCAGCTTACCGGGACTAGCCTACGAGCAGTACTTC	TRBV6-2	TRBD2	TRBJ2-7	TRBV6	TRBJ2	CASLPGLAYEQYF	TGTGCCAGCTTACCGGGACTAGCCTACGAGCAGTACTTC	:::::::::0::9:12:14::22:22::39:::
1490	TGTGCCAGCTTCGAGGGGGGCACAGATACGCAGTATTTT	TRBV6-1	TRBD1	TRBJ2-3	TRBV6	TRBJ2	CASFEGGTDTQYF	TGTGCCAGCTTCGAGGGGGGCACAGATACGCAGTATTTT	:::::::::0::9:13:::19:19::39:::
1491	TGTGCCAGGAGCGAGCCGCGACACCACGAGCAGTACTTC	TRBV6-1	TRBD1	TRBJ2-7	TRBV6	TRBJ2	CARSEPRHHEQYF	TGTGCCAGGAGCGAGCCGCGACACCACGAGCAGTACTTC	:::::::::0::14:15:17::23:25::39:::
1492	TGTGCCAGTACCCCGGGGACCGCATATGGCTACACCTTC	TRBV28	TRBD1	TRBJ1-2	TRBV28*00	TRBJ1	CASTPGTAYGYTF	TGTGCCAGTACCCCGGGGACCGCATATGGCTACACCTTC	:::::::::0::8:11:14::17:24::39:::
1493	TGTGCCAGTACCTTAGAAGGGGCGGCTGAAGCTTTCTTT	TRBV19	TRBD1	TRBJ1-1	TRBV19*00	TRBJ1	CASTLEGAAEAFF	TGTGCCAGTACCTTAGAAGGGGCGGCTGAAGCTTTCTTT	:::::::::0::10:18::23:24:25::39:::
1494	TGTGCCAGTACGGGGACAAGCTCCTACGAGCAGTACTTC	TRBV19	TRBD1	TRBJ2-7	TRBV19*00	TRBJ2	CASTGTSSYEQYF	TGTGCCAGTACGGGGACAAGCTCCTACGAGCAGTACTTC	:::::::::0::10:12:12::18:18:20:39:::
1495	TGTGCCAGTACTGGGGCCGCCTTGGGTCAGCCCCAGCATTTT	TRBV19	TRBD1	TRBJ1-5	TRBV19*00	TRBJ1	CASTGAALGQPQHF	TGTGCCAGTACTGGGGCCGCCTTGGGTCAGCCCCAGCATTTT	:::::::::0::10:12::18:21:26::42:::
1496	TGTGCCAGTAGCACCGGGAGGGCCTACGAGCAGTACTTC	TRBV19		TRBJ2-7	TRBV19*00	TRBJ2	CASSTGRAYEQYF	TGTGCCAGTAGCACCGGGAGGGCCTACGAGCAGTACTTC	:::::::::0::11:::::16:20:39:::
1497	TGTGCCAGTAGCACGGGACTAGCCTATGAGCAGTTCTTC	TRBV19	TRBD2	TRBJ2-1	TRBV19*00	TRBJ2	CASSTGLAYEQFF	TGTGCCAGTAGCACGGGACTAGCCTATGAGCAGTTCTTC	:::::::::0::11:13:14::23:25::39:::
1498	TGTGCCAGTAGCAGGGGTGATGCCTACGAGCAGTACTTC	TRBV27	TRBD1	TRBJ2-7	TRBV27*00	TRBJ2	CASSRGDAYEQYF	TGTGCCAGTAGCAGGGGTGATGCCTACGAGCAGTACTTC	:::::::::0::11:11:::17:22::39:::
1499	TGTGCCAGTAGCCCACAGGATTCCAGCAATCAGCCCCAGCATTTT	TRBV19	TRBD1	TRBJ1-5	TRBV19*00	TRBJ1	CASSPQDSSNQPQHF	TGTGCCAGTAGCCCACAGGATTCCAGCAATCAGCCCCAGCATTTT	:::::::::0::11:14:::19:24::45:::
1500	TGTGCCAGTAGCCCTTATTTGGGTGACGGAAACACCATATATTTT	TRBV19		TRBJ1-3	TRBV19*00	TRBJ1	CASSPYLGDGNTIYF	TGTGCCAGTAGCCCTTATTTGGGTGACGGAAACACCATATATTTT	:::::::::0::11:::::27::45:::
1501	TGTGCCAGTAGCCGTGACTGCGCCTACGAGCAGTACTTC	TRBV12-3	TRBD2	TRBJ2-7	TRBV12	TRBJ2	CASSRDCAYEQYF	TGTGCCAGTAGCCGTGACTGCGCCTACGAGCAGTACTTC	:::::::::0::11:11:13::19:19:20:39:::
1502	TGTGCCAGTAGTACAACAGGGGCCTACGAGCAGTACTTC	TRBV19	TRBD1	TRBJ2-7	TRBV19*00	TRBJ2	CASSTTGAYEQYF	TGTGCCAGTAGTACAACAGGGGCCTACGAGCAGTACTTC	:::::::::0::13:15:::22:22::39:::
1503	TGTGCCAGTAGTACAGGGGGGGCCTACGAGCAGTACTTC	TRBV19	TRBD1	TRBJ2-7	TRBV19*00	TRBJ2	CASSTGGAYEQYF	TGTGCCAGTAGTACAGGGGGGGCCTACGAGCAGTACTTC	:::::::::0::16:16:::21:22::39:::
1504	TGTGCCAGTAGTATAGATTCGCTGGGCGCGAACTATGGCTACACCTTC	TRBV19		TRBJ1-2	TRBV19*00	TRBJ1	CASSIDSLGANYGYTF	TGTGCCAGTAGTATAGATTCGCTGGGCGCGAACTATGGCTACACCTTC	:::::::::0:17:18:::::27:28:48:::
1505	TGTGCCAGTAGTATCTGGGGGAACACTGAAGAGTTCTTT	TRBV19		TRBJ1-1	TRBV19*00	TRBJ1	CASSIWGNTEEFF	TGTGCCAGTAGTATCTGGGGGAACACTGAAGAGTTCTTT	:::::::::0::14:::::20::39:::
1506	TGTGCCAGTAGTATCTGGGGGAACACTGAAGCTTTCTTT	TRBV19		TRBJ1-1	TRBV19*00	TRBJ1	CASSIWGNTEAFF	TGTGCCAGTAGTATCTGGGGGAACACTGAAGCTTTCTTT	:::::::::0::14:::::20::39:::
1507	TGTGCCAGTAGTATTCCTGCCGGGGGCGCCTATGGCTACACCTTC	TRBV19	TRBD1	TRBJ1-2	TRBV19*00	TRBJ1	CASSIPAGGAYGYTF	TGTGCCAGTAGTATTCCTGCCGGGGGCGCCTATGGCTACACCTTC	:::::::::0::14:21::27:29:29::45:::
1508	TGTGCCAGTAGTCTTTCCGGGACACAAGCCTACGAGCAGTACTTC	TRBV19	TRBD1	TRBJ2-7	TRBV19*00	TRBJ2	CASSLSGTQAYEQYF	TGTGCCAGTAGTCTTTCCGGGACACAAGCCTACGAGCAGTACTTC	:::::::::0::12:16:18::24:28::45:::
1509	TGTGCCAGTAGTGCGGGGGGCGCCTACGAGCAGTACGTC	TRBV19		TRBJ2-7	TRBV19*00	TRBJ2	CASSAGGAYEQYV	TGTGCCAGTAGTGCGGGGGGCGCCTACGAGCAGTACGTC	:::::::::0::12:::::16:20:39:::
1510	TGTGCCAGTAGTGGGGGACCGGGATCCTACGAGCAGTACTTC	TRBV19	TRBD1	TRBJ2-7	TRBV19*00	TRBJ2	CASSGGPGSYEQYF	TGTGCCAGTAGTGGGGGACCGGGATCCTACGAGCAGTACTTC	:::::::::0::12:14:14::23:24::42:::
1511	TGTGCCAGTAGTTACTCGAGGACAGGCGCCTATGGCTACACCTTC	TRBV6-5	TRBD1	TRBJ1-2	TRBV6	TRBJ1	CASSYSRTGAYGYTF	TGTGCCAGTAGTTACTCGAGGACAGGCGCCTATGGCTACACCTTC	:::::::::0:17:20:20:::26:29::45:::
1512	TGTGCCAGTAGTTACTGGGGTTCGGGTTCTGAGCAGTTCTTC	TRBV6-2		TRBJ2-1	TRBV6	TRBJ2	CASSYWGSGSEQFF	TGTGCCAGTAGTTACTGGGGTTCGGGTTCTGAGCAGTTCTTC	:::::::::0::16:::::29::42:::
1513	TGTGCCAGTAGTTCCCCCGGGACAGGGGCCTACGAGCAGTACTTC	TRBV19	TRBD1	TRBJ2-7	TRBV19*00	TRBJ2	CASSSPGTGAYEQYF	TGTGCCAGTAGTTCCCCCGGGACAGGGGCCTACGAGCAGTACTTC	:::::::::0::12:15:18::28:28::45:::
1514	TGTGCCAGTAGTTCCTCCAGGACAGGGGCCTACGAGCAGTACTTC	TRBV19	TRBD1	TRBJ2-7	TRBV19*00	TRBJ2	CASSSSRTGAYEQYF	TGTGCCAGTAGTTCCTCCAGGACAGGGGCCTACGAGCAGTACTTC	:::::::::0::12:16:18::28:28::45:::
1515	TGTGCCAGTCGGGTCCTTTTGGACATCTACGAGCAGTACGTC	TRBV19	TRBD1	TRBJ2-7	TRBV19*00	TRBJ2	CASRVLLDIYEQYV	TGTGCCAGTCGGGTCCTTTTGGACATCTACGAGCAGTACGTC	:::::::::0::9:20:::25:26::42:::
1516	TGTGCCAGTGCCCCGTTCGGGGGGGCGGGCTACACCTTC	TRBV27	TRBD1	TRBJ1-2	TRBV27*00	TRBJ1	CASAPFGGAGYTF	TGTGCCAGTGCCCCGTTCGGGGGGGCGGGCTACACCTTC	:::::::::0::8:20::26:27:27::39:::
1517	TGTGCCAGTGCTGGCGGGACGGCCTACGAGCAGTACTTC	TRBV19	TRBD2	TRBJ2-7	TRBV19*00	TRBJ2	CASAGGTAYEQYF	TGTGCCAGTGCTGGCGGGACGGCCTACGAGCAGTACTTC	:::::::::0::9:10::22:22:22::39:::
1518	TGTGCCAGTGGGGACAGGGCTAAGCCCCAGTATTTT	TRBV2	TRBD1	TRBJ1-5	TRBV2*00	TRBJ1	CASGDRAKPQYF	TGTGCCAGTGGGGACAGGGCTAAGCCCCAGTATTTT	:::::::::0::8:10:10::19:22::36:::
1519	TGTGCCATCAGCAGTGACAGCGCCTACGAGCAGTACTTC	TRBV12-3		TRBJ2-7	TRBV12	TRBJ2	CAISSDSAYEQYF	TGTGCCATCAGCAGTGACAGCGCCTACGAGCAGTACTTC	:::::::::0::11:::::18:20:39:::
1520	TGTGCCATCAGCGACGGGGGGCTGGCCTATGGCTACACCTTC	TRBV10-3	TRBD1	TRBJ1-2	TRBV10	TRBJ1	CAISDGGLAYGYTF	TGTGCCATCAGCGACGGGGGGCTGGCCTATGGCTACACCTTC	:::::::::0::14:16::22:22:26::42:::
1521	TGTGCCATCAGCGGGGGGATCTCCTACGAGCAGTACGTC	TRBV28		TRBJ2-7	TRBV28*00	TRBJ2	CAISGGISYEQYV	TGTGCCATCAGCGGGGGGATCTCCTACGAGCAGTACGTC	:::::::::0::11:::::16:20:39:::
1522	TGTGCCATCAGTGAAGAGGGGCTATGGGTAGGCTACACCTTC	TRBV10-3	TRBD1	TRBJ1-2	TRBV10	TRBJ1	CAISEEGLWVGYTF	TGTGCCATCAGTGAAGAGGGGCTATGGGTAGGCTACACCTTC	:::::::::0::14:16:::21:30::42:::
1523	TGTGCCATCAGTGAATGGACACTGGGTGAAGCTTTCTTT	TRBV10-3		TRBJ1-1	TRBV10	TRBJ1	CAISEWTLGEAFF	TGTGCCATCAGTGAATGGACACTGGGTGAAGCTTTCTTT	:::::::::0:17:20:::::26::39:::
1524	TGTGCCATCAGTGACGGCGGACAAGAGACCCAGTACTTC	TRBV10-3		TRBJ2-5	TRBV10	TRBJ2	CAISDGGQETQYF	TGTGCCATCAGTGACGGCGGACAAGAGACCCAGTACTTC	:::::::::0::14:::::21::39:::
1525	TGTGCCATCAGTGACGGCGGGGGGGCATATGAGCAGTTCTTC	TRBV10-3	TRBD2	TRBJ2-1	TRBV10	TRBJ2	CAISDGGGAYEQFF	TGTGCCATCAGTGACGGCGGGGGGGCATATGAGCAGTTCTTC	:::::::::0::14:16::25:26:28::42:::
1526	TGTGCCATCAGTGAGACCGGTACAGGGAGCTATGGCTACACCTTC	TRBV10-3	TRBD1	TRBJ1-2	TRBV10	TRBJ1	CAISETGTGSYGYTF	TGTGCCATCAGTGAGACCGGTACAGGGAGCTATGGCTACACCTTC	:::::::::0::15:16:18::27:29::45:::
1527	TGTGCCATCAGTGAGACCGGTACCGGGAGCTATGGCTACACCTTC	TRBV10-3	TRBD1	TRBJ1-2	TRBV10	TRBJ1	CAISETGTGSYGYTF	TGTGCCATCAGTGAGACCGGTACCGGGAGCTATGGCTACACCTTC	:::::::::0::15:16:24::28:29::45:::
1528	TGTGCCATCAGTGAGGGGCGGGGCGAAACCGGGGAGCTGTTTTTT	TRBV10-3	TRBD1	TRBJ2-2	TRBV10	TRBJ2	CAISEGRGETGELFF	TGTGCCATCAGTGAGGGGCGGGGCGAAACCGGGGAGCTGTTTTTT	:::::::::0::15:15::19:20:22:23:45:::
1529	TGTGCCATCAGTGAGGTCCAGACAGGGGCCTATGGCTACACCTTC	TRBV10-3	TRBD1	TRBJ1-2	TRBV10	TRBJ1	CAISEVQTGAYGYTF	TGTGCCATCAGTGAGGTCCAGACAGGGGCCTATGGCTACACCTTC	:::::::::0::15:20:::28:29::45:::
1530	TGTGCCATCAGTGAGTCGCCGGAACAGGGGGCGTACGAGCAGTACTTC	TRBV10-3	TRBD1	TRBJ2-7	TRBV10	TRBJ2	CAISESPEQGAYEQYF	TGTGCCATCAGTGAGTCGCCGGAACAGGGGGCGTACGAGCAGTACTTC	:::::::::0:17:18:18:20:32:33:33::48:::
1531	TGTGCCATCAGTGAGTCGGGGACAGGGGCCTACGAGCAGTACTTC	TRBV10-3	TRBD1	TRBJ2-7	TRBV10	TRBJ2	CAISESGTGAYEQYF	TGTGCCATCAGTGAGTCGGGGACAGGGGCCTACGAGCAGTACTTC	:::::::::0:17:18:18:18::28:28::45:::
1532	TGTGCCATCAGTGTCGAGGGGACAGGCCTGGGATATGGCTACACCTTC	TRBV10-3	TRBD1	TRBJ1-2	TRBV10	TRBJ1	CAISVEGTGLGYGYTF	TGTGCCATCAGTGTCGAGGGGACAGGCCTGGGATATGGCTACACCTTC	:::::::::0::13:18:18::26:33::48:::
1533	TGTGCCATCGGGACTAGCGGGGGCTATGAGCAGTTCTTC	TRBV6-1	TRBD2	TRBJ2-1	TRBV6	TRBJ2	CAIGTSGGYEQFF	TGTGCCATCGGGACTAGCGGGGGCTATGAGCAGTTCTTC	:::::::::0::7:8:9::21:25::39:::
1534	TGTGCCATTTCGCTAGCGGGAGGGAACAATGAGCAGTTCTTC	TRBV15	TRBD2	TRBJ2-1	TRBV15*00	TRBJ2	CAISLAGGNNEQFF	TGTGCCATTTCGCTAGCGGGAGGGAACAATGAGCAGTTCTTC	:::::::::0::7:12::24:24:25::42:::
1535	TGTGCCATTTCGCTAGCGGGGGGGAACAATGAGCAGTTCTTC	TRBV15	TRBD2	TRBJ2-1	TRBV15*00	TRBJ2	CAISLAGGNNEQFF	TGTGCCATTTCGCTAGCGGGGGGGAACAATGAGCAGTTCTTC	:::::::::0::7:12::24:24:25::42:::
1536	TGTGCCGCAAACCAGCAGGGTGACTATGGCTACACCTTC	TRBV10-3	TRBD1	TRBJ1-2	TRBV10	TRBJ1	CAANQQGDYGYTF	TGTGCCGCAAACCAGCAGGGTGACTATGGCTACACCTTC	:::::::::0::6:15:::20:22::39:::
1537	TGTGCCGCCAGCAGAGCTATGAACACTGAAGCGTTCTTT	TRBV15		TRBJ1-1	TRBV15*00	TRBJ1	CAASRAMNTEAFF	TGTGCCGCCAGCAGAGCTATGAACACTGAAGCGTTCTTT	:::::::::0::16:::::18:19:39:::
1538	TGTGCCGGAGGCCAAGAATCGACTAGCGGGGGGGTACCGAATTATTTG	TRBV4-2	TRBD2	TRBJ2-4	TRBV4	TRBJ2	CAGGQESTSGGVPNYL	TGTGCCGGAGGCCAAGAATCGACTAGCGGGGGGGTACCGAATTATTTG	:::::::::0:17:17:20::34:34:42::48:::
1539	TGTGCCGGCCGTCACGGGGCTTCCTACGAGCAGTACGTC	TRBV28	TRBD1	TRBJ2-7	TRBV28*00	TRBJ2	CAGRHGASYEQYV	TGTGCCGGCCGTCACGGGGCTTCCTACGAGCAGTACGTC	:::::::::0::12:12::20:20:21::39:::
1540	TGTGCCGTGGCGGGACAGGGCTCCTACGAGCAGTACTTC	TRBV6-1	TRBD1	TRBJ2-7	TRBV6	TRBJ2	CAVAGQGSYEQYF	TGTGCCGTGGCGGGACAGGGCTCCTACGAGCAGTACTTC	:::::::::0::6:10:11::16:16:20:39:::
1541	TGTGCCTCTGGGACTAGCGGGGCCTACGAGCAGTACTTC	TRBV19	TRBD2	TRBJ2-7	TRBV19*00	TRBJ2	CASGTSGAYEQYF	TGTGCCTCTGGGACTAGCGGGGCCTACGAGCAGTACTTC	:::::::::0::6:9:9::21:22::39:::
1542	TGTGCCTGCGGGGAAGCGCCAGCCTACGAGCAGTACTTC	TRBV6-2	TRBD1	TRBJ2-7	TRBV6	TRBJ2	CACGEAPAYEQYF	TGTGCCTGCGGGGAAGCGCCAGCCTACGAGCAGTACTTC	:::::::::0::9:15::17:20:22::39:::
1543	TGTGCCTGCTCCGGGGGGGCTGGACAGCCCCAGCATTTT	TRBV2	TRBD2	TRBJ1-5	TRBV2*00	TRBJ1	CACSGGAGQPQHF	TGTGCCTGCTCCGGGGGGGCTGGACAGCCCCAGCATTTT	:::::::::0::9:11::19:20:24::39:::
1544	TGTGCCTGGAACGGGGGGCGGGGACAGCCCCAGCATTTT	TRBV30	TRBD1	TRBJ1-5	TRBV30*00	TRBJ1	CAWNGGRGQPQHF	TGTGCCTGGAACGGGGGGCGGGGACAGCCCCAGCATTTT	:::::::::0::10:10::19:20:24::39:::
1545	TGTGCCTGGAGCACCGGGGCCGCCTACGAGCAGTACTTC	TRBV30	TRBD1	TRBJ2-7	TRBV30*00	TRBJ2	CAWSTGAAYEQYF	TGTGCCTGGAGCACCGGGGCCGCCTACGAGCAGTACTTC	:::::::::0::11:13:15::18:22::39:::
1546	TGTGCCTGGAGCCCCTCTGTCGGGGGCTCTCAGCCCCAGCATTTT	TRBV30	TRBD1	TRBJ1-5	TRBV30*00	TRBJ1	CAWSPSVGGSQPQHF	TGTGCCTGGAGCCCCTCTGTCGGGGGCTCTCAGCCCCAGCATTTT	:::::::::0::11:11:::21:29::45:::
1547	TGTGCCTGGAGCGAGGGGCCGAAAGGGGCCTACGAGCAGTACTTC	TRBV30	TRBD1	TRBJ2-7	TRBV30*00	TRBJ2	CAWSEGPKGAYEQYF	TGTGCCTGGAGCGAGGGGCCGAAAGGGGCCTACGAGCAGTACTTC	:::::::::0::11:20:::28:28::45:::
1548	TGTGCCTGGAGGTGGGGGTTAGGGACTGAAGCTTTCTTT	TRBV30	TRBD1	TRBJ1-1	TRBV30*00	TRBJ1	CAWRWGLGTEAFF	TGTGCCTGGAGGTGGGGGTTAGGGACTGAAGCTTTCTTT	:::::::::0::11:13:::18:24::39:::
1549	TGTGCCTGGAGTAGAAACGGGAAGGAAGCTTTCTTT	TRBV30	TRBD1	TRBJ1-1	TRBV30*00	TRBJ1	CAWSRNGKEAFF	TGTGCCTGGAGTAGAAACGGGAAGGAAGCTTTCTTT	:::::::::0::12:17:18::22:24::36:::
1550	TGTGCCTGGAGTGCGGGCCTGGCCTACGAGCAGTACTTC	TRBV30	TRBD2	TRBJ2-7	TRBV30*00	TRBJ2	CAWSAGLAYEQYF	TGTGCCTGGAGTGCGGGCCTGGCCTACGAGCAGTACTTC	:::::::::0::13:14::17:19:22::39:::
1551	TGTGCCTGGAGTGTACCAGTAGCCCAGGCCGGGGGGAAGGACACAGATACGCAGTATTTT	TRBV30	TRBD1	TRBJ2-3	TRBV30*00	TRBJ2	CAWSVPVAQAGGKDTDTQYF	TGTGCCTGGAGTGTACCAGTAGCCCAGGCCGGGGGGAAGGACACAGATACGCAGTATTTT	:::::::::0:14:16:22:25::36:41::60:::
1552	TGTGCCTGTAACTGGGGGCGGGGACAGCCCCAGCATTTT	TRBV30	TRBD1	TRBJ1-5	TRBV30*00	TRBJ1	CACNWGRGQPQHF	TGTGCCTGTAACTGGGGGCGGGGACAGCCCCAGCATTTT	:::::::::0::8:10::19:20:24::39:::
1553	TGTGCGAGCAGTTCTGGACCCGGACAGGCCCTCGGCTACACCTTC	TRBV27	TRBD1	TRBJ1-2	TRBV27*00	TRBJ1	CASSSGPGQALGYTF	TGTGCGAGCAGTTCTGGACCCGGACAGGCCCTCGGCTACACCTTC	:::::::::0::13:18:21::28:33::45:::
1554	TGTGCTACCAGCATGGCGAGCAATCAGCCCCAGCATTTT	TRBV15		TRBJ1-5	TRBV15*00	TRBJ1	CATSMASNQPQHF	TGTGCTACCAGCATGGCGAGCAATCAGCCCCAGCATTTT	:::::::::0::13:::::18::39:::
1555	TGTGCTAGAAGCTCTGGGTGCACCAACTGCAATGAGCAGTTCTTC	TRBV5-3		TRBJ2-1	TRBV5	TRBJ2	CARSSGCTNCNEQFF	TGTGCTAGAAGCTCTGGGTGCACCAACTGCAATGAGCAGTTCTTC	:::::::::0:17:17:::::26::45:::
1556	TGTGCTAGCAGCGAGGGTTCCCCCTACAATGAGCAGTTCTTC	TRBV9		TRBJ2-1	TRBV9*00	TRBJ2	CASSEGSPYNEQFF	TGTGCTAGCAGCGAGGGTTCCCCCTACAATGAGCAGTTCTTC	:::::::::0::13:::::22::42:::
1557	TGTGCTAGCAGCTTAAAGGGGCTGAACACTGAAGCTTTCTTT	TRBV7-7	TRBD1	TRBJ1-1	TRBV7	TRBJ1	CASSLKGLNTEAFF	TGTGCTAGCAGCTTAAAGGGGCTGAACACTGAAGCTTTCTTT	:::::::::0::15:16:::21:22:22:42:::
1558	TGTGCTAGCAGTTATGAGAGGAACACTGAAGCTTTCTTT	TRBV15		TRBJ1-1	TRBV15*00	TRBJ1	CASSYERNTEAFF	TGTGCTAGCAGTTATGAGAGGAACACTGAAGCTTTCTTT	:::::::::0::11:::::20::39:::
1559	TGTGCTAGTGGTGCGACGGGCGGAACTGAAGTTTTCTTT	TRBV12-5	TRBD1	TRBJ1-1	TRBV12	TRBJ1	CASGATGGTEVFF	TGTGCTAGTGGTGCGACGGGCGGAACTGAAGTTTTCTTT	:::::::::0::12:17::21:22:24::39:::
1560	TGTGCTAGTGGTGGGACGGGCGGAACTGAAGTTTTCTTT	TRBV12-5	TRBD1	TRBJ1-1	TRBV12	TRBJ1	CASGGTGGTEVFF	TGTGCTAGTGGTGGGACGGGCGGAACTGAAGTTTTCTTT	:::::::::0::12:12:12::20:24::39:::
1561	TGTGGCAGCAGCTTAGCGGGGTCCACTGAAGCTTTCTTT	TRBV5-5		TRBJ1-1	TRBV5	TRBJ1	CGSSLAGSTEAFF	TGTGGCAGCAGCTTAGCGGGGTCCACTGAAGCTTTCTTT	:::::::::0:16:17:::::23::39:::
1562	TGTGGCAGCAGTCCCGGGACGGCTAATCAGGCCCAGCATTTT	TRBV27	TRBD1	TRBJ1-5	TRBV27*00	TRBJ1	CGSSPGTANQAQHF	TGTGGCAGCAGTCCCGGGACGGCTAATCAGGCCCAGCATTTT	:::::::::0::12:12:15::20:24::42:::
1563	TGTGTCAGCAGTGAGGGACAGGGAAGCAATCAGCCCCAGCATTTT	TRBV25-1	TRBD1	TRBJ1-5	TRBV25	TRBJ1	CVSSEGQGSNQPQHF	TGTGTCAGCAGTGAGGGACAGGGAAGCAATCAGCCCCAGCATTTT	:::::::::0::14:14:14::23:24::45:::
1564	TGTGTCAGTAGTATTTCGGCGAACACTGAAGCTTTCTTT	TRBV19		TRBJ1-1	TRBV19*00	TRBJ1	CVSSISANTEAFF	TGTGTCAGTAGTATTTCGGCGAACACTGAAGCTTTCTTT	:::::::::0::14:::::20::39:::
1565	TGTTCCACCAGCAGAGATCTCCCGACAGGACGACCAGAGACCCAGTACTTC	TRBV15	TRBD1	TRBJ2-5	TRBV15*00	TRBJ2	CSTSRDLPTGRPETQYF	TGTTCCACCAGCAGAGATCTCCCGACAGGACGACCAGAGACCCAGTACTTC	:::::::::0:17:21:23:::29:32:32:51:::
1566	TGTTCCAGCAGCCGAGGCCCGGGACAGGCCTACGAGCAGTACTTC	TRBV12-1	TRBD1	TRBJ2-7	TRBV12	TRBJ2	CSSSRGPGQAYEQYF	TGTTCCAGCAGCCGAGGCCCGGGACAGGCCTACGAGCAGTACTTC	:::::::::0::12:17:20::28:28::45:::
1567	TGTTCCAGCAGCTTGTTGAGCGGGGGGGCCTACGAGCAGTACTTC	TRBV11-1	TRBD2	TRBJ2-7	TRBV11	TRBJ2	CSSSLLSGGAYEQYF	TGTTCCAGCAGCTTGTTGAGCGGGGGGGCCTACGAGCAGTACTTC	:::::::::0::14:18::28:28:28::45:::
1568	TGTTCCAGCAGTGAGGGACAGGGAAGCAATCAGCCCCAGCATTTT	TRBV25-1	TRBD1	TRBJ1-5	TRBV25	TRBJ1	CSSSEGQGSNQPQHF	TGTTCCAGCAGTGAGGGACAGGGAAGCAATCAGCCCCAGCATTTT	:::::::::0::14:14:14::23:24::45:::
1569	TGTTCCATCAGTGATGGGACTAGTGGTAGCTCCAACGATGAGCAGTTCTTC	TRBV10-3	TRBD2	TRBJ2-1	TRBV10	TRBJ2	CSISDGTSGSSNDEQFF	TGTTCCATCAGTGATGGGACTAGTGGTAGCTCCAACGATGAGCAGTTCTTC	:::::::::0::14:15:15::26:27:29:51:::
1570	TTCAGCGTTCCGACTAGCGGGGGGCACAATGAGCAGTTCTTC	TRBV29-1	TRBD2	TRBJ2-1	TRBV29	TRBJ2	FSVPTSGGHNEQFF	TTCAGCGTTCCGACTAGCGGGGGGCACAATGAGCAGTTCTTC	:::::::::0::9:11::24:25:25::42:::
1571	TTTGCCAGCAGGCTATTGGAGGGGGGCCTCTACGCCCACTACTTC	TRBV12-3	TRBD1	TRBJ2-7	TRBV12	TRBJ2	FASRLLEGGLYAHYF	TTTGCCAGCAGGCTATTGGAGGGGGGCCTCTACGCCCACTACTTC	:::::::::0::11:19::25:28:29::45:::
1572	AGTGCCAGCAACCCGGGGGGGGGCTATGAGCAGTTCTTC	TRBV9	TRBD1	TRBJ2-1	TRBV9*00	TRBJ2	SASNPGGGYEQFF	AGTGCCAGCAACCCGGGGGGGGGCTATGAGCAGTTCTTC	:::::::::0::10:11:14::17:25::39:::
1573	CGTGCCAGCAGCCAAGAAGGGACAGGGACTATTTCACCCCTCCACTTT	TRBV3-1	TRBD1	TRBJ1-6	TRBV3	TRBJ1	RASSQEGTGTISPLHF	CGTGCCAGCAGCCAAGAAGGGACAGGGACTATTTCACCCCTCCACTTT	:::::::::0:17:17:18:18::27:29::48:::
1574	GGTGCCAGCAGCACTCCGGGACAGAGCTCTGGAAACACCATATATTTT	TRBV6-1	TRBD1	TRBJ1-3	TRBV6	TRBJ1	GASSTPGQSSGNTIYF	GGTGCCAGCAGCACTCCGGGACAGAGCTCTGGAAACACCATATATTTT	:::::::::0::11:15:17::21:21:26:48:::
1575	TGCAGCGCCAGTGCGGGCATATCCTACGAGCAGTACTTC	TRBV29-1	TRBD2	TRBJ2-7	TRBV29	TRBJ2	CSASAGISYEQYF	TGCAGCGCCAGTGCGGGCATATCCTACGAGCAGTACTTC	:::::::::0::7:12:::17:21::39:::
1576	TGCAGCGTCTCTGAGGGCCCGGCAGATACGCAGTATTTT	TRBV29-1	TRBD2	TRBJ2-3	TRBV29	TRBJ2	CSVSEGPADTQYF	TGCAGCGTCTCTGAGGGCCCGGCAGATACGCAGTATTTT	:::::::::0::8:12::17:20:22::39:::
1577	TGCAGCGTTGCTCTAGCGGGGGGTAGCAATGAGCAGTTCTTC	TRBV29-1	TRBD2	TRBJ2-1	TRBV29	TRBJ2	CSVALAGGSNEQFF	TGCAGCGTTGCTCTAGCGGGGGGTAGCAATGAGCAGTTCTTC	:::::::::0::10:12::23:23:26::42:::
1578	TGCAGCGTTGGACAGGGCGAGGCCTATGGCTACACCTTC	TRBV29-1	TRBD1	TRBJ1-2	TRBV29	TRBJ1	CSVGQGEAYGYTF	TGCAGCGTTGGACAGGGCGAGGCCTATGGCTACACCTTC	:::::::::0::10:10:::17:23::39:::
1579	TGCAGCGTTGGAGGTTCACAGCCCTACGAGCAGTACTTC	TRBV29-1		TRBJ2-7	TRBV29	TRBJ2	CSVGGSQPYEQYF	TGCAGCGTTGGAGGTTCACAGCCCTACGAGCAGTACTTC	:::::::::0::13:::::19:21:39:::
1580	TGCAGCGTTGGGGACAAGGCAGATACGCAGTATTTT	TRBV29-1	TRBD1	TRBJ2-3	TRBV29	TRBJ2	CSVGDKADTQYF	TGCAGCGTTGGGGACAAGGCAGATACGCAGTATTTT	:::::::::0::10:10:10::19:19::36:::
1581	TGCAGTGCGCCACTAGCGGGGGGGCCAAATGAGCAGTTCTTC	TRBV20-1	TRBD2	TRBJ2-1	TRBV20	TRBJ2	CSAPLAGGPNEQFF	TGCAGTGCGCCACTAGCGGGGGGGCCAAATGAGCAGTTCTTC	:::::::::0::8:11::24:26:27::42:::
1582	TGCAGTGCTAGAGATCGGAGGGGCAGGGGAAACATTCAGTACTTC	TRBV20-1	TRBD1	TRBJ2-4	TRBV20	TRBJ2	CSARDRRGRGNIQYF	TGCAGTGCTAGAGATCGGAGGGGCAGGGGAAACATTCAGTACTTC	:::::::::0:14:16:19:19::29:29::45:::
1583	TGCAGTGCTAGCGGGGGACGGGGCACAGATACGCAGTATTTT	TRBV20-1	TRBD1	TRBJ2-3	TRBV20	TRBJ2	CSASGGRGTDTQYF	TGCAGTGCTAGCGGGGGACGGGGCACAGATACGCAGTATTTT	:::::::::0::11:14:14::22:22::42:::
1584	TGCAGTGCTAGCGGTGGGCGGGGAACAGATACGCAGTATTTT	TRBV20-1	TRBD1	TRBJ2-3	TRBV20	TRBJ2	CSASGGRGTDTQYF	TGCAGTGCTAGCGGTGGGCGGGGAACAGATACGCAGTATTTT	:::::::::0::11:15::19:20:24::42:::
1585	TGCAGTGCTGCGGGGGGGAGGGGCACAGATACGCAGTATTTT	TRBV20-1	TRBD2	TRBJ2-3	TRBV20	TRBJ2	CSAAGGRGTDTQYF	TGCAGTGCTGCGGGGGGGAGGGGCACAGATACGCAGTATTTT	:::::::::0::9:15::22:22:22::42:::
1586	TGCAGTGTAAGTGACAGAGATTATAGCAATCAGCCCCAGCATTTT	TRBV20-1	TRBD1	TRBJ1-5	TRBV20	TRBJ1	CSVSDRDYSNQPQHF	TGCAGTGTAAGTGACAGAGATTATAGCAATCAGCCCCAGCATTTT	:::::::::0::7:12:::17:21:23:45:::
1587	TGCAGTGTTCCGACTAGCGGGGGGCAAAACATTCAGTACTTC	TRBV20-1	TRBD2	TRBJ2-4	TRBV20	TRBJ2	CSVPTSGGQNIQYF	TGCAGTGTTCCGACTAGCGGGGGGCAAAACATTCAGTACTTC	:::::::::0::7:11::24:25:25::42:::
1588	TGCGCCAGCAGCCAAACCGAAGGGGGTCCTTATGGCTACACCTTC	TRBV4-3	TRBD1	TRBJ1-2	TRBV4	TRBJ1	CASSQTEGGPYGYTF	TGCGCCAGCAGCCAAACCGAAGGGGGTCCTTATGGCTACACCTTC	:::::::::0::15:20:::26:30::45:::
1589	TGCGCCAGCAGCCAACCAGGGGGTCTGAACACTGAAGCTTTCTTT	TRBV4-1	TRBD1	TRBJ1-1	TRBV4	TRBJ1	CASSQPGGLNTEAFF	TGCGCCAGCAGCCAACCAGGGGGTCTGAACACTGAAGCTTTCTTT	:::::::::0::15:16:::23:25:25:45:::
1590	TGCGCCAGCAGCCAAGATCAAGGCGGACAGGGGGCCTATGGCTACTCCTTC	TRBV4-3	TRBD1	TRBJ1-2	TRBV4	TRBJ1	CASSQDQGGQGAYGYSF	TGCGCCAGCAGCCAAGATCAAGGCGGACAGGGGGCCTATGGCTACTCCTTC	:::::::::0:17:19:24::35:35:35::51:::
1591	TGCGCCAGCAGCCAAGATCAGGGGGGGGCTTATGGCTACACCTTC	TRBV4-3	TRBD1	TRBJ1-2	TRBV4	TRBJ1	CASSQDQGGAYGYTF	TGCGCCAGCAGCCAAGATCAGGGGGGGGCTTATGGCTACACCTTC	:::::::::0:17:19:19:::25:30::45:::
1592	TGCGCCAGCAGCCAAGGACCGACAACCGGGAGCTATGGCTACACCTTC	TRBV4-3	TRBD2	TRBJ1-2	TRBV4	TRBJ1	CASSQGPTTGSYGYTF	TGCGCCAGCAGCCAAGGACCGACAACCGGGAGCTATGGCTACACCTTC	:::::::::0::16:20:::32:32::48:::
1593	TGCGCCAGCAGCCAAGGGATGTCAGGTACTGGGGCCAACGTCCTGACTTTC	TRBV4-3		TRBJ2-6	TRBV4	TRBJ2	CASSQGMSGTGANVLTF	TGCGCCAGCAGCCAAGGGATGTCAGGTACTGGGGCCAACGTCCTGACTTTC	:::::::::0::16:::::28::51:::
1594	TGCGCCAGCAGCCAAGGGTCGGCCAGGGGGCAGGACGAGCAGTACTTC	TRBV4-3	TRBD1	TRBJ2-7	TRBV4	TRBJ2	CASSQGSARGQDEQYF	TGCGCCAGCAGCCAAGGGTCGGCCAGGGGGCAGGACGAGCAGTACTTC	:::::::::0::16:20::31:31:34::48:::
1595	TGCGCCAGCAGCCAAGTGGTCTTCGGGATGGGGGGACAGGACACTGAAGCTTTCTTT	TRBV4-1	TRBD1	TRBJ1-1	TRBV4	TRBJ1	CASSQVVFGMGGQDTEAFF	TGCGCCAGCAGCCAAGTGGTCTTCGGGATGGGGGGACAGGACACTGAAGCTTTCTTT	:::::::::0::16:32:32::40:40::57:::
1596	TGCGCCAGCAGCCAAGTTCCGGGACAGGGGGTCGATGGCTACACCTTC	TRBV4-1	TRBD1	TRBJ1-2	TRBV4	TRBJ1	CASSQVPGQGVDGYTF	TGCGCCAGCAGCCAAGTTCCGGGACAGGGGGTCGATGGCTACACCTTC	:::::::::0:17:19:19:20::31:34::48:::
1597	TGCGCCAGCAGCCACCTCCCGGGGGCGCTCTACGAGCAGTACTTC	TRBV4-3	TRBD1	TRBJ2-7	TRBV4	TRBJ2	CASSHLPGALYEQYF	TGCGCCAGCAGCCACCTCCCGGGGGCGCTCTACGAGCAGTACTTC	:::::::::0::14:16:20::23:23:27:45:::
1598	TGCGCCAGCAGCCAGCCCGGGGGCTACGAGCAGTACTTC	TRBV4-1	TRBD1	TRBJ2-7	TRBV4	TRBJ2	CASSQPGGYEQYF	TGCGCCAGCAGCCAGCCCGGGGGCTACGAGCAGTACTTC	:::::::::0::14:15:18::21:23::39:::
1599	TGCGCCAGCAGCCAGGGTGGGTATGGCTACACCTTC	TRBV4-3		TRBJ1-2	TRBV4	TRBJ1	CASSQGGYGYTF	TGCGCCAGCAGCCAGGGTGGGTATGGCTACACCTTC	:::::::::0::14:::::21::36:::
1600	TGCGCCAGCAGCCCAGGACAGGGGTCCTACGAGCAGTACTTC	TRBV4-3	TRBD1	TRBJ2-7	TRBV4	TRBJ2	CASSPGQGSYEQYF	TGCGCCAGCAGCCCAGGACAGGGGTCCTACGAGCAGTACTTC	:::::::::0::16:16:::24:24::42:::
1601	TGCGCCAGCAGCCCCTGGACAGGGTATAAAGCTTTCTTT	TRBV4-3	TRBD1	TRBJ1-1	TRBV4	TRBJ1	CASSPWTGYKAFF	TGCGCCAGCAGCCCCTGGACAGGGTATAAAGCTTTCTTT	:::::::::0::13:13:15::24:28::39:::
1602	TGCGCCAGCAGCCGGGAGAGGGACTCCTACTACGAGCAGTACTTC	TRBV5-1	TRBD1	TRBJ2-7	TRBV5	TRBJ2	CASSRERDSYYEQYF	TGCGCCAGCAGCCGGGAGAGGGACTCCTACTACGAGCAGTACTTC	:::::::::0::12:12:13::22:26:26:45:::
1603	TGCGCCAGCAGCTCAGCGACAGGGTTTGCCTACGAGCAGTACTTC	TRBV5-1	TRBD1	TRBJ2-7	TRBV5	TRBJ2	CASSSATGFAYEQYF	TGCGCCAGCAGCTCAGCGACAGGGTTTGCCTACGAGCAGTACTTC	:::::::::0::13:17:::24:28::45:::
1604	TGCGCCAGCAGCTCCGCGGAGGCCTACGAGCAGTACTTC	TRBV5-1	TRBD2	TRBJ2-7	TRBV5	TRBJ2	CASSSAEAYEQYF	TGCGCCAGCAGCTCCGCGGAGGCCTACGAGCAGTACTTC	:::::::::0::13:17:::22:22::39:::
1605	TGCGCCAGCAGTATAGCGTACGAGCAGTACTTC	TRBV5-1	TRBD2	TRBJ2-7	TRBV5	TRBJ2	CASSIAYEQYF	TGCGCCAGCAGTATAGCGTACGAGCAGTACTTC	:::::::::0::11:13:::18:18::33:::
1606	TGCGCCAGCAGTCCAAGGACAGGGAACACTGAAGCTTTCTTT	TRBV4-3	TRBD1	TRBJ1-1	TRBV4	TRBJ1	CASSPRTGNTEAFF	TGCGCCAGCAGTCCAAGGACAGGGAACACTGAAGCTTTCTTT	:::::::::0::17:17:::23:23::42:::
1607	TGCGCCAGCAGTGTTGAGCGGGAAACTTACGAGCAGTACTTC	TRBV10-2	TRBD2	TRBJ2-7	TRBV10	TRBJ2	CASSVERETYEQYF	TGCGCCAGCAGTGTTGAGCGGGAAACTTACGAGCAGTACTTC	:::::::::0::13:16:::23:27::42:::
1608	TGCGCCAGTAGCCTAGGGACAGGGGATGAGCAGTTCTTC	TRBV5-1	TRBD1	TRBJ2-1	TRBV5	TRBJ2	CASSLGTGDEQFF	TGCGCCAGTAGCCTAGGGACAGGGGATGAGCAGTTCTTC	:::::::::0::12:15:15::25:25::39:::
1609	TGCGCCATAGAAGGATCGAACACCGGGGAGCTGTTTTTT	TRBV4-1		TRBJ2-2	TRBV4	TRBJ2	CAIEGSNTGELFF	TGCGCCATAGAAGGATCGAACACCGGGGAGCTGTTTTTT	:::::::::0::7:::::16:16:39:::
1610	TGTGACAGCAGCGTAGGGGGGGTCCCCTACAATGAGCAGTTCTTC	TRBV9	TRBD1	TRBJ2-1	TRBV9*00	TRBJ2	CDSSVGGVPYNEQFF	TGTGACAGCAGCGTAGGGGGGGTCCCCTACAATGAGCAGTTCTTC	:::::::::0:16:16:16:::21:25::45:::
1611	TGTGCCACCACGCATGGGGGCCCTAACTATGGCTACACCTTC	TRBV2	TRBD1	TRBJ1-2	TRBV2*00	TRBJ1	CATTHGGPNYGYTF	TGTGCCACCACGCATGGGGGCCCTAACTATGGCTACACCTTC	:::::::::0::10:15::21:21:22:22:42:::
1612	TGTGCCACCAGCACCCGGGCCGCCGGCGAGCAGTACTTC	TRBV15	TRBD1	TRBJ2-7	TRBV15*00	TRBJ2	CATSTRAAGEQYF	TGTGCCACCAGCACCCGGGCCGCCGGCGAGCAGTACTTC	:::::::::0::13:13:16::19:26::39:::
1613	TGTGCCACCAGCAGAGATCAAGTGGGAGCCAATCAGCCCCAGCATTTT	TRBV15	TRBD2	TRBJ1-5	TRBV15*00	TRBJ1	CATSRDQVGANQPQHF	TGTGCCACCAGCAGAGATCAAGTGGGAGCCAATCAGCCCCAGCATTTT	:::::::::0:17:19:20:::28:29::48:::
1614	TGTGCCACCAGCAGAGATGGGGGGGCTAGCGGGGCCTACGAGCAGTACTTC	TRBV15	TRBD2	TRBJ2-7	TRBV15*00	TRBJ2	CATSRDGGASGAYEQYF	TGTGCCACCAGCAGAGATGGGGGGGCTAGCGGGGCCTACGAGCAGTACTTC	:::::::::0:17:18:21:21::33:34::51:::
1615	TGTGCCACCAGCAGAGCCCCAGGGTACGAGCAGTACGTC	TRBV15	TRBD1	TRBJ2-7	TRBV15*00	TRBJ2	CATSRAPGYEQYV	TGTGCCACCAGCAGAGCCCCAGGGTACGAGCAGTACGTC	:::::::::0::16:19:::24:24::39:::
1616	TGTGCCACCAGCAGAGCGCCGGGCAATCAGCCCCAGCATTTT	TRBV15		TRBJ1-5	TRBV15*00	TRBJ1	CATSRAPGNQPQHF	TGTGCCACCAGCAGAGCGCCGGGCAATCAGCCCCAGCATTTT	:::::::::0::16:::::22::42:::
1617	TGTGCCACCAGCAGAGGAGTGGGCTACGAGCAGTACTTC	TRBV15		TRBJ2-7	TRBV15*00	TRBJ2	CATSRGVGYEQYF	TGTGCCACCAGCAGAGGAGTGGGCTACGAGCAGTACTTC	:::::::::0::16:::::23::39:::
1618	TGTGCCACCAGCAGAGGGCCGGGCAATCAGCCCCAGCATTTT	TRBV15		TRBJ1-5	TRBV15*00	TRBJ1	CATSRGPGNQPQHF	TGTGCCACCAGCAGAGGGCCGGGCAATCAGCCCCAGCATTTT	:::::::::0::16:::::22::42:::
1619	TGTGCCACCAGCAGAGGGGGGGCCGGGGAGCTGTTTTTT	TRBV15	TRBD1	TRBJ2-2	TRBV15*00	TRBJ2	CATSRGGAGELFF	TGTGCCACCAGCAGAGGGGGGGCCGGGGAGCTGTTTTTT	:::::::::0::16:16:::21:22::39:::
1620	TGTGCCACCAGCAGAGGTAGTGCCTACGAGCAGTACGTC	TRBV15		TRBJ2-7	TRBV15*00	TRBJ2	CATSRGSAYEQYV	TGTGCCACCAGCAGAGGTAGTGCCTACGAGCAGTACGTC	:::::::::0::16:::::22::39:::
1621	TGTGCCACCAGCAGCGCAGTAAACTATGGCTACACCTTC	TRBV15		TRBJ1-2	TRBV15*00	TRBJ1	CATSSAVNYGYTF	TGTGCCACCAGCAGCGCAGTAAACTATGGCTACACCTTC	:::::::::0::14:::::21::39:::
1622	TGTGCCACCAGCAGCGCGACAGGGGCTCAGCCCCAGCATTTT	TRBV15	TRBD1	TRBJ1-5	TRBV15*00	TRBJ1	CATSSATGAQPQHF	TGTGCCACCAGCAGCGCGACAGGGGCTCAGCCCCAGCATTTT	:::::::::0::14:14:15::25:26::42:::
1623	TGTGCCACCAGCAGCGGGACAGCCTACGAGCAGTACTTC	TRBV15	TRBD1	TRBJ2-7	TRBV15*00	TRBJ2	CATSSGTAYEQYF	TGTGCCACCAGCAGCGGGACAGCCTACGAGCAGTACTTC	:::::::::0::14:14:15::22:22::39:::
1624	TGTGCCACCAGCCCGGGGAGCTCCTACGAGCAGTACTTC	TRBV15		TRBJ2-7	TRBV15*00	TRBJ2	CATSPGSSYEQYF	TGTGCCACCAGCCCGGGGAGCTCCTACGAGCAGTACTTC	:::::::::0::12:::::16:20:39:::
1625	TGTGCCACCAGCGGAGGGGTGGGTTACGCGCAGTACGTC	TRBV15		TRBJ2-7	TRBV15*00	TRBJ2	CATSGGVGYAQYV	TGTGCCACCAGCGGAGGGGTGGGTTACGCGCAGTACGTC	:::::::::0::16:::::24::39:::
1626	TGTGCCACCAGCGGCGGAAGCTCCTACGAGCAGTACTTC	TRBV15		TRBJ2-7	TRBV15*00	TRBJ2	CATSGGSSYEQYF	TGTGCCACCAGCGGCGGAAGCTCCTACGAGCAGTACTTC	:::::::::0::12:::::18:20:39:::
1627	TGTGCCACCAGTTCGGCGGGGGCTTACGAGCAGTACTTC	TRBV15	TRBD1	TRBJ2-7	TRBV15*00	TRBJ2	CATSSAGAYEQYF	TGTGCCACCAGTTCGGCGGGGGCTTACGAGCAGTACTTC	:::::::::0::11:17::23:23:24::39:::
1628	TGTGCCACCGCGATGGGGGCGGCTAACAATGAGCAGTTCTTC	TRBV9	TRBD1	TRBJ2-1	TRBV9*00	TRBJ2	CATAMGAANNEQFF	TGTGCCACCGCGATGGGGGCGGCTAACAATGAGCAGTTCTTC	:::::::::0::7:14::20:21:25::42:::
1629	TGTGCCACCGGAGGACGGACGGGCGGGGAGCTGTTTTTT	TRBV15	TRBD2	TRBJ2-2	TRBV15*00	TRBJ2	CATGGRTGGELFF	TGTGCCACCGGAGGACGGACGGGCGGGGAGCTGTTTTTT	:::::::::0::9:9:::14:23::39:::
1630	TGTGCCACCGGAGGCGGCATCTCCTACGAGCAGTACTTC	TRBV15	TRBD2	TRBJ2-7	TRBV15*00	TRBJ2	CATGGGISYEQYF	TGTGCCACCGGAGGCGGCATCTCCTACGAGCAGTACTTC	:::::::::0::9:9:::14:20:20:39:::
1631	TGTGCCAGAGAGGGACGGTTTGAAGCTTTCTTT	TRBV19	TRBD1	TRBJ1-1	TRBV19*00	TRBJ1	CAREGRFEAFF	TGTGCCAGAGAGGGACGGTTTGAAGCTTTCTTT	:::::::::0::8:11:11::16:20::33:::
1632	TGTGCCAGATACTGGGAACGGGTTTTCGAAGCTTTCTTT	TRBV11-1		TRBJ1-1	TRBV11	TRBJ1	CARYWERVFEAFF	TGTGCCAGATACTGGGAACGGGTTTTCGAAGCTTTCTTT	:::::::::0::8:::::27::39:::
1633	TGTGCCAGCAACCCCGCGGGGGGCGAGACCCAGTACTTC	TRBV6-1	TRBD2	TRBJ2-5	TRBV6	TRBJ2	CASNPAGGETQYF	TGTGCCAGCAACCCCGCGGGGGGCGAGACCCAGTACTTC	:::::::::0::10:15::23:24:24::39:::
1634	TGTGCCAGCAATGTAGGGAACACCGGGGAGCTGTTTTTT	TRBV9		TRBJ2-2	TRBV9*00	TRBJ2	CASNVGNTGELFF	TGTGCCAGCAATGTAGGGAACACCGGGGAGCTGTTTTTT	:::::::::0:16:16:::::17::39:::
1635	TGTGCCAGCACCCCGGGACCAGCCTACGAGCAGTACTTC	TRBV7-2	TRBD2	TRBJ2-7	TRBV7	TRBJ2	CASTPGPAYEQYF	TGTGCCAGCACCCCGGGACCAGCCTACGAGCAGTACTTC	:::::::::0::10:11:14::22:22::39:::
1636	TGTGCCAGCACCCTAGCGGGGACGTACGAGCAGTACTTC	TRBV12-3	TRBD2	TRBJ2-7	TRBV12	TRBJ2	CASTLAGTYEQYF	TGTGCCAGCACCCTAGCGGGGACGTACGAGCAGTACTTC	:::::::::0::10:12:::20:24::39:::
1637	TGTGCCAGCACCCTCGGCGCGGGAGGCACCTACGAGCAGTACTTC	TRBV27	TRBD1	TRBJ2-7	TRBV27*00	TRBJ2	CASTLGAGGTYEQYF	TGTGCCAGCACCCTCGGCGCGGGAGGCACCTACGAGCAGTACTTC	:::::::::0::10:15::18:20:21:26:45:::
1638	TGTGCCAGCACTCCCGGGACAGAAAGCTACGAGCAGTACTTC	TRBV6-2	TRBD1	TRBJ2-7	TRBV6	TRBJ2	CASTPGTESYEQYF	TGTGCCAGCACTCCCGGGACAGAAAGCTACGAGCAGTACTTC	:::::::::0::10:11:15::22:26::42:::
1639	TGTGCCAGCACTCGGGGGACAGGGGGAACAGATACGCAGTATTTT	TRBV27	TRBD1	TRBJ2-3	TRBV27*00	TRBJ2	CASTRGTGGTDTQYF	TGTGCCAGCACTCGGGGGACAGGGGGAACAGATACGCAGTATTTT	:::::::::0::10:15:15::26:27::45:::
1640	TGTGCCAGCAGCAAAAACCGTGGCAGGTTGGAAGAGACCCAGTACTTC	TRBV21-1		TRBJ2-5	TRBV21	TRBJ2	CASSKNRGRLEETQYF	TGTGCCAGCAGCAAAAACCGTGGCAGGTTGGAAGAGACCCAGTACTTC	:::::::::0::15:::::31::48:::
1641	TGTGCCAGCAGCAAAAAGTTCGGGGGGCGAGGTGGAAACACCATATATTTT	TRBV21-1	TRBD1	TRBJ1-3	TRBV21	TRBJ1	CASSKKFGGRGGNTIYF	TGTGCCAGCAGCAAAAAGTTCGGGGGGCGAGGTGGAAACACCATATATTTT	:::::::::0::15:22::28:29:32::51:::
1642	TGTGCCAGCAGCAAAGGGGGCTCTTCGCAGGCTTTCTTT	TRBV6-1	TRBD1	TRBJ1-1	TRBV6	TRBJ1	CASSKGGSSQAFF	TGTGCCAGCAGCAAAGGGGGCTCTTCGCAGGCTTTCTTT	:::::::::0::11:14::21:21:30::39:::
1643	TGTGCCAGCAGCACCGGGGGGGCGCCCTACAATGAGCAGTTCTTC	TRBV9	TRBD1	TRBJ2-1	TRBV9*00	TRBJ2	CASSTGGAPYNEQFF	TGTGCCAGCAGCACCGGGGGGGCGCCCTACAATGAGCAGTTCTTC	:::::::::0::12:17::23:25:25::45:::
1644	TGTGCCAGCAGCACGAGCGGGGGGGGAACCGGGGAGCTGTTTTTT	TRBV6-1	TRBD2	TRBJ2-2	TRBV6	TRBJ2	CASSTSGGGTGELFF	TGTGCCAGCAGCACGAGCGGGGGGGGAACCGGGGAGCTGTTTTTT	:::::::::0::11:12::25:25:27::45:::
1645	TGTGCCAGCAGCAGGACTAGCGGGGGGGCCTACGAGCAGTACGTC	TRBV6-1	TRBD2	TRBJ2-7	TRBV6	TRBJ2	CASSRTSGGAYEQYV	TGTGCCAGCAGCAGGACTAGCGGGGGGGCCTACGAGCAGTACGTC	:::::::::0::11:13::28:28:28::45:::
1646	TGTGCCAGCAGCATAGCCGGCCTGCCCTACTATGAGCAGTTCTTC	TRBV9		TRBJ2-1	TRBV9*00	TRBJ2	CASSIAGLPYYEQFF	TGTGCCAGCAGCATAGCCGGCCTGCCCTACTATGAGCAGTTCTTC	:::::::::0:16:17:::::25::45:::
1647	TGTGCCAGCAGCATGGGAGTTCCGTACGAGCAGTACTTC	TRBV7-6		TRBJ2-7	TRBV7	TRBJ2	CASSMGVPYEQYF	TGTGCCAGCAGCATGGGAGTTCCGTACGAGCAGTACTTC	:::::::::0::12:::::15:19:39:::
1648	TGTGCCAGCAGCCAAAACCCCCCCGGTGGCCACACCTTC	TRBV12-3	TRBD2	TRBJ1-2	TRBV12	TRBJ1	CASSQNPPGGHTF	TGTGCCAGCAGCCAAAACCCCCCCGGTGGCCACACCTTC	:::::::::0::11:17:::25:26::39:::
1649	TGTGCCAGCAGCCAAAACCCCCCCGGTGGCTACACCATC	TRBV12-3	TRBD2	TRBJ1-2	TRBV12	TRBJ1	CASSQNPPGGYTI	TGTGCCAGCAGCCAAAACCCCCCCGGTGGCTACACCATC	:::::::::0::11:17:::25:26::39:::
1650	TGTGCCAGCAGCCAACGGCGGGGGAGGCATTTT	TRBV9	TRBD2	TRBJ2-3	TRBV9*00	TRBJ2	CASSQRRGRHF	TGTGCCAGCAGCCAACGGCGGGGGAGGCATTTT	:::::::::0::12:21:::27:28::33:::
1651	TGTGCCAGCAGCCAAGAACCGGAGACATACGGGCAGTTCTTC	TRBV14	TRBD1	TRBJ2-1	TRBV14*00	TRBJ2	CASSQEPETYGQFF	TGTGCCAGCAGCCAAGAACCGGAGACATACGGGCAGTTCTTC	:::::::::0:17:17:18:20::27:32::42:::
1652	TGTGCCAGCAGCCAAGAACCGGAGACGTACGGGCAGTTCTTC	TRBV14		TRBJ2-1	TRBV14*00	TRBJ2	CASSQEPETYGQFF	TGTGCCAGCAGCCAAGAACCGGAGACGTACGGGCAGTTCTTC	:::::::::0:17:17:::::32::42:::
1653	TGTGCCAGCAGCCAAGAAGAATGGGCTGGCGCTGAAGCTTTCTTT	TRBV4-2		TRBJ1-1	TRBV4	TRBJ1	CASSQEEWAGAEAFF	TGTGCCAGCAGCCAAGAAGAATGGGCTGGCGCTGAAGCTTTCTTT	:::::::::0:17:17:::::31::45:::
1654	TGTGCCAGCAGCCAAGAAGCGGGGACGAATTCACCCCTCCACTTT	TRBV3-1	TRBD2	TRBJ1-6	TRBV3	TRBJ1	CASSQEAGTNSPLHF	TGTGCCAGCAGCCAAGAAGCGGGGACGAATTCACCCCTCCACTTT	:::::::::0:17:17:17:::23:27::45:::
1655	TGTGCCAGCAGCCAAGAAGGTTCCGAGGGGTTGGAGACCCAGTACTTC	TRBV4-2	TRBD1	TRBJ2-5	TRBV4	TRBJ2	CASSQEGSEGLETQYF	TGTGCCAGCAGCCAAGAAGGTTCCGAGGGGTTGGAGACCCAGTACTTC	:::::::::0:17:17:25:::30:33::48:::
1656	TGTGCCAGCAGCCAAGATATCTTCTATGGCTACACCTTC	TRBV3-1		TRBJ1-2	TRBV3	TRBJ1	CASSQDIFYGYTF	TGTGCCAGCAGCCAAGATATCTTCTATGGCTACACCTTC	:::::::::0:17:18:::::9:20:39:::
1657	TGTGCCAGCAGCCAAGATCTCCGCCGGCCTTCCTACGAGCAGTACTTC	TRBV3-1		TRBJ2-7	TRBV3	TRBJ2	CASSQDLRRPSYEQYF	TGTGCCAGCAGCCAAGATCTCCGCCGGCCTTCCTACGAGCAGTACTTC	:::::::::0:17:20:::::30::48:::
1658	TGTGCCAGCAGCCAAGCTCTAGCATATGAGCAGTACTTC	TRBV4-2		TRBJ2-7	TRBV4	TRBJ2	CASSQALAYEQYF	TGTGCCAGCAGCCAAGCTCTAGCATATGAGCAGTACTTC	:::::::::0:17:20:::::24::39:::
1659	TGTGCCAGCAGCCAAGCTCTAGCCTATGAGCAGTTCTTC	TRBV4-2		TRBJ2-1	TRBV4	TRBJ2	CASSQALAYEQFF	TGTGCCAGCAGCCAAGCTCTAGCCTATGAGCAGTTCTTC	:::::::::0:17:20:::::25::39:::
1660	TGTGCCAGCAGCCAGGACGACGACAGGGGAATAACAGATACGCAGTATTTT	TRBV4-2	TRBD1	TRBJ2-3	TRBV4	TRBJ2	CASSQDDDRGITDTQYF	TGTGCCAGCAGCCAGGACGACGACAGGGGAATAACAGATACGCAGTATTTT	:::::::::0:17:17:21:::29:33::51:::
1661	TGTGCCAGCAGCCATACAGGGGTTAGCACTGAAGCTTTCTTT	TRBV4-2	TRBD1	TRBJ1-1	TRBV4	TRBJ1	CASSHTGVSTEAFF	TGTGCCAGCAGCCATACAGGGGTTAGCACTGAAGCTTTCTTT	:::::::::0::14:15:::22:26::42:::
1662	TGTGCCAGCAGCCATAGTAGCGGGAGCGCCTACGAGCAGTACTTC	TRBV4-2	TRBD2	TRBJ2-7	TRBV4	TRBJ2	CASSHSSGSAYEQYF	TGTGCCAGCAGCCATAGTAGCGGGAGCGCCTACGAGCAGTACTTC	:::::::::0::14:17:::22:22:26:45:::
1663	TGTGCCAGCAGCCCATCCCTAGGGGGGGCAGATGGCTACACCTTC	TRBV3-1	TRBD1	TRBJ1-2	TRBV3	TRBJ1	CASSPSLGGADGYTF	TGTGCCAGCAGCCCATCCCTAGGGGGGGCAGATGGCTACACCTTC	:::::::::0::13:20::27:29:31::45:::
1664	TGTGCCAGCAGCCCCACCGGGGGCCAGCCCCAGCATTTT	TRBV6-2	TRBD1	TRBJ1-5	TRBV6	TRBJ1	CASSPTGGQPQHF	TGTGCCAGCAGCCCCACCGGGGGCCAGCCCCAGCATTTT	:::::::::0::11:15::24:24:24::39:::
1665	TGTGCCAGCAGCCCCCCCGCCGGGGCGAGCACTGAAGCTTTCTTT	TRBV9	TRBD2	TRBJ1-1	TRBV9*00	TRBJ1	CASSPPAGASTEAFF	TGTGCCAGCAGCCCCCCCGCCGGGGCGAGCACTGAAGCTTTCTTT	:::::::::0::12:12:::20:26::45:::
1666	TGTGCCAGCAGCCCCGCCTCTGGGTTTTACGAGCAGTACTTC	TRBV9	TRBD2	TRBJ2-7	TRBV9*00	TRBJ2	CASSPASGFYEQYF	TGTGCCAGCAGCCCCGCCTCTGGGTTTTACGAGCAGTACTTC	:::::::::0::12:12:::17:27::42:::
1667	TGTGCCAGCAGCCCCGGGACAGGGTCCTACGAGCAGTACTTC	TRBV9	TRBD1	TRBJ2-7	TRBV9*00	TRBJ2	CASSPGTGSYEQYF	TGTGCCAGCAGCCCCGGGACAGGGTCCTACGAGCAGTACTTC	:::::::::0::12:12:15::24:24::42:::
1668	TGTGCCAGCAGCCCGACGGGGAACACTGAAGCTTTCTTT	TRBV11-2		TRBJ1-1	TRBV11	TRBJ1	CASSPTGNTEAFF	TGTGCCAGCAGCCCGACGGGGAACACTGAAGCTTTCTTT	:::::::::0::12:::::20::39:::
1669	TGTGCCAGCAGCCCGGAATCTAGCGGGGGGGACAGTGAGCAGTTCTTC	TRBV4-2	TRBD2	TRBJ2-1	TRBV4	TRBJ2	CASSPESSGGDSEQFF	TGTGCCAGCAGCCCGGAATCTAGCGGGGGGGACAGTGAGCAGTTCTTC	:::::::::0::13:19::31:31:31::48:::
1670	TGTGCCAGCAGCCCGGAGGGGGTCTCCTACAATGAGCAGTTCTTC	TRBV9	TRBD1	TRBJ2-1	TRBV9*00	TRBJ2	CASSPEGVSYNEQFF	TGTGCCAGCAGCCCGGAGGGGGTCTCCTACAATGAGCAGTTCTTC	:::::::::0::12:16:::22:23:23:45:::
1671	TGTGCCAGCAGCCCGGGACCGTACTATGGCTACACCTTC	TRBV7-2	TRBD1	TRBJ1-2	TRBV7	TRBJ1	CASSPGPYYGYTF	TGTGCCAGCAGCCCGGGACCGTACTATGGCTACACCTTC	:::::::::0::12:12:14::19:22::39:::
1672	TGTGCCAGCAGCCCGGGACGATTAGGAAATCAGCCCCAGCATTTT	TRBV27	TRBD1	TRBJ1-5	TRBV27*00	TRBJ1	CASSPGRLGNQPQHF	TGTGCCAGCAGCCCGGGACGATTAGGAAATCAGCCCCAGCATTTT	:::::::::0::11:11:14::19:27::45:::
1673	TGTGCCAGCAGCCCGGGGGCGGCCTACGAGCAGTACTTC	TRBV7-2	TRBD1	TRBJ2-7	TRBV7	TRBJ2	CASSPGAAYEQYF	TGTGCCAGCAGCCCGGGGGCGGCCTACGAGCAGTACTTC	:::::::::0::12:14::20:21:22::39:::
1674	TGTGCCAGCAGCCGCACCGGACTGGGCCCCAACTACGCGCCGTACTTC	TRBV13	TRBD2	TRBJ2-7	TRBV13*00	TRBJ2	CASSRTGLGPNYAPYF	TGTGCCAGCAGCCGCACCGGACTGGGCCCCAACTACGCGCCGTACTTC	:::::::::0::12:23::26:29:32::48:::
1675	TGTGCCAGCAGCCTAAGTTACCTAGCGGGGGGACCCCAAGAGACCCAGTACTTC	TRBV3-1	TRBD2	TRBJ2-5	TRBV3	TRBJ2	CASSLSYLAGGPQETQYF	TGTGCCAGCAGCCTAAGTTACCTAGCGGGGGGACCCCAAGAGACCCAGTACTTC	:::::::::0::17:21::32:35:35::54:::
1676	TGTGCCAGCAGCCTACAGGGATCTGGGGCCAACGTCCTGACTTTC	TRBV12-3		TRBJ2-6	TRBV12	TRBJ2	CASSLQGSGANVLTF	TGTGCCAGCAGCCTACAGGGATCTGGGGCCAACGTCCTGACTTTC	:::::::::0::11:::::15:20:45:::
1677	TGTGCCAGCAGCCTCCCCGGGCCCCAGCATTTT	TRBV7-3	TRBD1	TRBJ1-5	TRBV7	TRBJ1	CASSLPGPQHF	TGTGCCAGCAGCCTCCCCGGGCCCCAGCATTTT	:::::::::0::12:15:18::20:20::33:::
1678	TGTGCCAGCAGCCTCCCGGGGGGTTATGGCTACACCTTC	TRBV6-1	TRBD1	TRBJ1-2	TRBV6	TRBJ1	CASSLPGGYGYTF	TGTGCCAGCAGCCTCCCGGGGGGTTATGGCTACACCTTC	:::::::::0::11:13:17::20:24::39:::
1679	TGTGCCAGCAGCCTGGGGGGGGCCTACGAGCAGTACTTC	TRBV7-8	TRBD1	TRBJ2-7	TRBV7	TRBJ2	CASSLGGAYEQYF	TGTGCCAGCAGCCTGGGGGGGGCCTACGAGCAGTACTTC	:::::::::0::12:14:::19:22::39:::
1680	TGTGCCAGCAGCGAGGGGGGAAACTATGGCTACACCTTC	TRBV9	TRBD1	TRBJ1-2	TRBV9*00	TRBJ1	CASSEGGNYGYTF	TGTGCCAGCAGCGAGGGGGGAAACTATGGCTACACCTTC	:::::::::0::13:13:::19:21::39:::
1681	TGTGCCAGCAGCGCAGCCGGGAACCAGCCCCAGCATTTT	TRBV11-2	TRBD1	TRBJ1-5	TRBV11	TRBJ1	CASSAAGNQPQHF	TGTGCCAGCAGCGCAGCCGGGAACCAGCCCCAGCATTTT	:::::::::0::12:16:18::21:21::39:::
1682	TGTGCCAGCAGCGCCAGACTAGGCAATGAGCAGTTCTTC	TRBV7-3	TRBD2	TRBJ2-1	TRBV7	TRBJ2	CASSARLGNEQFF	TGTGCCAGCAGCGCCAGACTAGGCAATGAGCAGTTCTTC	:::::::::0::12:16:::22:23::39:::
1683	TGTGCCAGCAGCGCCGGGGGGGATGCTTATGGCTACACCTTC	TRBV9	TRBD2	TRBJ1-2	TRBV9*00	TRBJ1	CASSAGGDAYGYTF	TGTGCCAGCAGCGCCGGGGGGGATGCTTATGGCTACACCTTC	:::::::::0::13:14::22:22:27::42:::
1684	TGTGCCAGCAGCGGACAGGGGGTCCCCTACAATGAGCAGTTCTTC	TRBV9	TRBD1	TRBJ2-1	TRBV9*00	TRBJ2	CASSGQGVPYNEQFF	TGTGCCAGCAGCGGACAGGGGGTCCCCTACAATGAGCAGTTCTTC	:::::::::0::13:13:::22:25::45:::
1685	TGTGCCAGCAGCGGGGGGACACACTACAATGAGCAGTTCTTC	TRBV9	TRBD1	TRBJ2-1	TRBV9*00	TRBJ2	CASSGGTHYNEQFF	TGTGCCAGCAGCGGGGGGACACACTACAATGAGCAGTTCTTC	:::::::::0::13:15:15::21:23::42:::
1686	TGTGCCAGCAGCGGGGGGGCATTGGCCGGGGAGCTGTTTTTT	TRBV9	TRBD1	TRBJ2-2	TRBV9*00	TRBJ2	CASSGGALAGELFF	TGTGCCAGCAGCGGGGGGGCATTGGCCGGGGAGCTGTTTTTT	:::::::::0::13:14::20:20:25::42:::
1687	TGTGCCAGCAGCGTAAGTATTATGGCGGAGCAGTACTTC	TRBV9		TRBJ2-7	TRBV9*00	TRBJ2	CASSVSIMAEQYF	TGTGCCAGCAGCGTAAGTATTATGGCGGAGCAGTACTTC	:::::::::0::15:::::27::39:::
1688	TGTGCCAGCAGCGTACTAGCCGGGGGAGCAGATACGCAGTATTTT	TRBV9	TRBD1	TRBJ2-3	TRBV9*00	TRBJ2	CASSVLAGGADTQYF	TGTGCCAGCAGCGTACTAGCCGGGGGAGCAGATACGCAGTATTTT	:::::::::0:15:18:19:21::24:28::45:::
1689	TGTGCCAGCAGCGTAGACGGTATACCCCAAGAGACCCAGTACTTC	TRBV9		TRBJ2-5	TRBV9*00	TRBJ2	CASSVDGIPQETQYF	TGTGCCAGCAGCGTAGACGGTATACCCCAAGAGACCCAGTACTTC	:::::::::0:16:16:::::26::45:::
1690	TGTGCCAGCAGCGTAGCCGGGAGCTCCTACGAGCAGTACTTC	TRBV9		TRBJ2-7	TRBV9*00	TRBJ2	CASSVAGSSYEQYF	TGTGCCAGCAGCGTAGCCGGGAGCTCCTACGAGCAGTACTTC	:::::::::0:16:17:::::19:23:42:::
1691	TGTGCCAGCAGCGTAGCCGGTAACTATGGCTACACCTTC	TRBV9		TRBJ1-2	TRBV9*00	TRBJ1	CASSVAGNYGYTF	TGTGCCAGCAGCGTAGCCGGTAACTATGGCTACACCTTC	:::::::::0:16:17:::::20::39:::
1692	TGTGCCAGCAGCGTAGCTGTAGGGGCTAACTATGGCTACACCTTC	TRBV9		TRBJ1-2	TRBV9*00	TRBJ1	CASSVAVGANYGYTF	TGTGCCAGCAGCGTAGCTGTAGGGGCTAACTATGGCTACACCTTC	:::::::::0:16:18:::::24:25:45:::
1693	TGTGCCAGCAGCGTAGGGGGTGTCCCTTACAATGAGCAGTTCTTC	TRBV9	TRBD1	TRBJ2-1	TRBV9*00	TRBJ2	CASSVGGVPYNEQFF	TGTGCCAGCAGCGTAGGGGGTGTCCCTTACAATGAGCAGTTCTTC	:::::::::0:16:16:20:26::26:27::45:::
1694	TGTGCCAGCAGCGTAGGTGGGGTATCCTACAATGAGCAGTTCTTC	TRBV9		TRBJ2-1	TRBV9*00	TRBJ2	CASSVGGVSYNEQFF	TGTGCCAGCAGCGTAGGTGGGGTATCCTACAATGAGCAGTTCTTC	:::::::::0:16:16:::::24::45:::
1695	TGTGCCAGCAGCGTAGGTGGGGTCTCCTACTATGAGCAGTTCTTC	TRBV9		TRBJ2-1	TRBV9*00	TRBJ2	CASSVGGVSYYEQFF	TGTGCCAGCAGCGTAGGTGGGGTCTCCTACTATGAGCAGTTCTTC	:::::::::0:16:16:::::23:23:45:::
1696	TGTGCCAGCAGCGTAGTAGGATCCCCCTACAATGAGCAGTTCTTC	TRBV9		TRBJ2-1	TRBV9*00	TRBJ2	CASSVVGSPYNEQFF	TGTGCCAGCAGCGTAGTAGGATCCCCCTACAATGAGCAGTTCTTC	:::::::::0:16:16:::::15:22:45:::
1697	TGTGCCAGCAGCGTAGTTGGGGAGTCCTACGAGCAGTACTTC	TRBV9		TRBJ2-7	TRBV9*00	TRBJ2	CASSVVGESYEQYF	TGTGCCAGCAGCGTAGTTGGGGAGTCCTACGAGCAGTACTTC	:::::::::0:16:16:::::20:24:42:::
1698	TGTGCCAGCAGCGTAGTTGGGGGTCCTGGGGCCAACGTCCTGACTTTC	TRBV9	TRBD1	TRBJ2-6	TRBV9*00	TRBJ2	CASSVVGGPGANVLTF	TGTGCCAGCAGCGTAGTTGGGGGTCCTGGGGCCAACGTCCTGACTTTC	:::::::::0:16:16:18:::23:25::48:::
1699	TGTGCCAGCAGCGTGGGACAGGGGAATCAGCCCCAGCATTTT	TRBV5-5	TRBD1	TRBJ1-5	TRBV5	TRBJ1	CASSVGQGNQPQHF	TGTGCCAGCAGCGTGGGACAGGGGAATCAGCCCCAGCATTTT	:::::::::0:16:16:16:::24:24::42:::
1700	TGTGCCAGCAGCGTTACTAGCGGGGCGGCAGATACGCAGTATTTT	TRBV9	TRBD2	TRBJ2-3	TRBV9*00	TRBJ2	CASSVTSGAADTQYF	TGTGCCAGCAGCGTTACTAGCGGGGCGGCAGATACGCAGTATTTT	:::::::::0::14:15:::24:28::45:::
1701	TGTGCCAGCAGCGTTGAGGGAGACGCCTACGAGCAGTACTTC	TRBV9		TRBJ2-7	TRBV9*00	TRBJ2	CASSVEGDAYEQYF	TGTGCCAGCAGCGTTGAGGGAGACGCCTACGAGCAGTACTTC	:::::::::0::14:::::18:23:42:::
1702	TGTGCCAGCAGCGTTGGGGGCGTCCCCTACAATGAGCAGTTCTTC	TRBV9	TRBD1	TRBJ2-1	TRBV9*00	TRBJ2	CASSVGGVPYNEQFF	TGTGCCAGCAGCGTTGGGGGCGTCCCCTACAATGAGCAGTTCTTC	:::::::::0::14:15::21:25:25::45:::
1703	TGTGCCAGCAGCGTTTCTGGGGCCAACGTCCTGACTTTC	TRBV9		TRBJ2-6	TRBV9*00	TRBJ2	CASSVSGANVLTF	TGTGCCAGCAGCGTTTCTGGGGCCAACGTCCTGACTTTC	:::::::::0::14:::::15::39:::
1704	TGTGCCAGCAGCTCACAGGGCTACGAGCAGTACGTC	TRBV5-6	TRBD1	TRBJ2-7	TRBV5	TRBJ2	CASSSQGYEQYV	TGTGCCAGCAGCTCACAGGGCTACGAGCAGTACGTC	:::::::::0::13:14:::20:20::36:::
1705	TGTGCCAGCAGCTCCGGGACAGGGATCTACGAGCAGTACTTC	TRBV9	TRBD1	TRBJ2-7	TRBV9*00	TRBJ2	CASSSGTGIYEQYF	TGTGCCAGCAGCTCCGGGACAGGGATCTACGAGCAGTACTTC	:::::::::0::12:13:15::24:26::42:::
1706	TGTGCCAGCAGCTCTAGCGGGGCGTACGAGCAGTACTTC	TRBV11-2	TRBD1	TRBJ2-7	TRBV11	TRBJ2	CASSSSGAYEQYF	TGTGCCAGCAGCTCTAGCGGGGCGTACGAGCAGTACTTC	:::::::::0::17:18::23:24:24::39:::
1707	TGTGCCAGCAGCTGGCCCGGAGGGGGCAATGAGCAGTTCTTC	TRBV5-5	TRBD1	TRBJ2-1	TRBV5	TRBJ2	CASSWPGGGNEQFF	TGTGCCAGCAGCTGGCCCGGAGGGGGCAATGAGCAGTTCTTC	:::::::::0:15:17:20:::26:26::42:::
1708	TGTGCCAGCAGCTTAACAACGGGGAGCACTGAAGCTTTCTTT	TRBV7-6		TRBJ1-1	TRBV7	TRBJ1	CASSLTTGSTEAFF	TGTGCCAGCAGCTTAACAACGGGGAGCACTGAAGCTTTCTTT	:::::::::0::15:::::23::42:::
1709	TGTGCCAGCAGCTTAACTGGTCAGGGTAAGTTCTTC	TRBV7-2	TRBD1	TRBJ2-1	TRBV7	TRBJ2	CASSLTGQGKFF	TGTGCCAGCAGCTTAACTGGTCAGGGTAAGTTCTTC	:::::::::0::15:18:::26:28::36:::
1710	TGTGCCAGCAGCTTAGCGGGGGGGTATGAGCAGTTCTTC	TRBV11-3	TRBD2	TRBJ2-1	TRBV11	TRBJ2	CASSLAGGYEQFF	TGTGCCAGCAGCTTAGCGGGGGGGTATGAGCAGTTCTTC	:::::::::0::16:16::24:24:25::39:::
1711	TGTGCCAGCAGCTTAGGACCGGCCTACGAGCAGTACTTC	TRBV11-3		TRBJ2-7	TRBV11	TRBJ2	CASSLGPAYEQYF	TGTGCCAGCAGCTTAGGACCGGCCTACGAGCAGTACTTC	:::::::::0::16:::::22::39:::
1712	TGTGCCAGCAGCTTAGGGCCGTACGAGCAGTACTTC	TRBV13		TRBJ2-7	TRBV13*00	TRBJ2	CASSLGPYEQYF	TGTGCCAGCAGCTTAGGGCCGTACGAGCAGTACTTC	:::::::::0:17:17:::::13:18:36:::
1713	TGTGCCAGCAGCTTAGGGCGGCTAGCGGGGGGGCCGAGAGTGGAGACCCAGTACTTC	TRBV11-2	TRBD2	TRBJ2-5	TRBV11	TRBJ2	CASSLGRLAGGPRVETQYF	TGTGCCAGCAGCTTAGGGCGGCTAGCGGGGGGGCCGAGAGTGGAGACCCAGTACTTC	:::::::::0::16:21::33:35:42::57:::
1714	TGTGCCAGCAGCTTAGGGGGGGCCTCCTACAATGAGCAGTTCTTC	TRBV7-3	TRBD1	TRBJ2-1	TRBV7	TRBJ2	CASSLGGASYNEQFF	TGTGCCAGCAGCTTAGGGGGGGCCTCCTACAATGAGCAGTTCTTC	:::::::::0::15:17::23:23:23:23:45:::
1715	TGTGCCAGCAGCTTAGTAAGAGATCAGCACGAGCAGTACTTC	TRBV7-6		TRBJ2-7	TRBV7	TRBJ2	CASSLVRDQHEQYF	TGTGCCAGCAGCTTAGTAAGAGATCAGCACGAGCAGTACTTC	:::::::::0::16:::::28::42:::
1716	TGTGCCAGCAGCTTCCCAAACAATGAGCAGTTCTTC	TRBV7-9		TRBJ2-1	TRBV7	TRBJ2	CASSFPNNEQFF	TGTGCCAGCAGCTTCCCAAACAATGAGCAGTTCTTC	:::::::::0::14:::::19::36:::
1717	TGTGCCAGCAGCTTGCAGGTAGATACGCAGGATTTT	TRBV5-6		TRBJ2-3	TRBV5	TRBJ2	CASSLQVDTQDF	TGTGCCAGCAGCTTGCAGGTAGATACGCAGGATTTT	:::::::::0::15:::::20::36:::
1718	TGTGCCAGCAGCTTGGAATCCATTGGGAATCAGCCCCAGCATTTT	TRBV5-5		TRBJ1-5	TRBV5	TRBJ1	CASSLESIGNQPQHF	TGTGCCAGCAGCTTGGAATCCATTGGGAATCAGCCCCAGCATTTT	:::::::::0:16:16:::::27::45:::
1719	TGTGCCAGCAGCTTGGAGGTTCCAGCGGGGGTGTACGAGCAGTACTTC	TRBV5-5	TRBD2	TRBJ2-7	TRBV5	TRBJ2	CASSLEVPAGVYEQYF	TGTGCCAGCAGCTTGGAGGTTCCAGCGGGGGTGTACGAGCAGTACTTC	:::::::::0:16:16:23:::29:33::48:::
1720	TGTGCCAGCAGCTTGGCAGGGTCCAATGAGCAGTTCTTC	TRBV5-6		TRBJ2-1	TRBV5	TRBJ2	CASSLAGSNEQFF	TGTGCCAGCAGCTTGGCAGGGTCCAATGAGCAGTTCTTC	:::::::::0:16:17:::::23::39:::
1721	TGTGCCAGCAGCTTGGGGCGGGAAGCTTTCTTT	TRBV5-6		TRBJ1-1	TRBV5	TRBJ1	CASSLGREAFF	TGTGCCAGCAGCTTGGGGCGGGAAGCTTTCTTT	:::::::::0:16:16:::::21::33:::
1722	TGTGCCAGCAGCTTGTCTGGGATGGGTGAGCAGTACTTC	TRBV5-5		TRBJ2-7	TRBV5	TRBJ2	CASSLSGMGEQYF	TGTGCCAGCAGCTTGTCTGGGATGGGTGAGCAGTACTTC	:::::::::0::15:::::27::39:::
1723	TGTGCCAGCAGCTTTACCGGGACAGGGTACAATGAGCAGTTCTTC	TRBV9	TRBD1	TRBJ2-1	TRBV9*00	TRBJ2	CASSFTGTGYNEQFF	TGTGCCAGCAGCTTTACCGGGACAGGGTACAATGAGCAGTTCTTC	:::::::::0::12:16:18::27:27::45:::
1724	TGTGCCAGCAGCTTTAGGGGTGAAGAGACCCAGTACTTC	TRBV13		TRBJ2-5	TRBV13*00	TRBJ2	CASSFRGEETQYF	TGTGCCAGCAGCTTTAGGGGTGAAGAGACCCAGTACTTC	:::::::::0:18:18:::::22::39:::
1725	TGTGCCAGCAGCTTTGCACTAGCCTACGAGCAGTACTTC	TRBV7-2		TRBJ2-7	TRBV7	TRBJ2	CASSFALAYEQYF	TGTGCCAGCAGCTTTGCACTAGCCTACGAGCAGTACTTC	:::::::::0:17:21:::::22::39:::
1726	TGTGCCAGCAGGGCCGGGACAGTTAACAATGAGCAGTTCTTC	TRBV12-4	TRBD1	TRBJ2-1	TRBV12	TRBJ2	CASRAGTVNNEQFF	TGTGCCAGCAGGGCCGGGACAGTTAACAATGAGCAGTTCTTC	:::::::::0::11:13:15::22:25::42:::
1727	TGTGCCAGCAGGGGGGGAGCGAACACCGGGGAGCTGTTTTTT	TRBV13	TRBD1	TRBJ2-2	TRBV13*00	TRBJ2	CASRGGANTGELFF	TGTGCCAGCAGGGGGGGAGCGAACACCGGGGAGCTGTTTTTT	:::::::::0::11:11:::16:18:19:42:::
1728	TGTGCCAGCAGTAACACAGATACGCAGTATTTT	TRBV5-6		TRBJ2-3	TRBV5	TRBJ2	CASSNTDTQYF	TGTGCCAGCAGTAACACAGATACGCAGTATTTT	:::::::::0::11:::::11:12:33:::
1729	TGTGCCAGCAGTACGGCAGGCAATCAGCCCCAGCATTTT	TRBV27		TRBJ1-5	TRBV27*00	TRBJ1	CASSTAGNQPQHF	TGTGCCAGCAGTACGGCAGGCAATCAGCCCCAGCATTTT	:::::::::0::12:::::19::39:::
1730	TGTGCCAGCAGTCAGCTCGGGGACACTGAAGCTTTCTTT	TRBV6-1		TRBJ1-1	TRBV6	TRBJ1	CASSQLGDTEAFF	TGTGCCAGCAGTCAGCTCGGGGACACTGAAGCTTTCTTT	:::::::::0::12:::::22::39:::
1731	TGTGCCAGCAGTCAGGGGATCGATGGCTACACCTTC	TRBV6-6	TRBD1	TRBJ1-2	TRBV6	TRBJ1	CASSQGIDGYTF	TGTGCCAGCAGTCAGGGGATCGATGGCTACACCTTC	:::::::::0::12:12:::18:22::36:::
1732	TGTGCCAGCAGTCATCAGGGAGGCTACGAGCAGTACTTC	TRBV6-2	TRBD2	TRBJ2-7	TRBV6	TRBJ2	CASSHQGGYEQYF	TGTGCCAGCAGTCATCAGGGAGGCTACGAGCAGTACTTC	:::::::::0::12:17:::23:23::39:::
1733	TGTGCCAGCAGTCCCGCGGGAGGGGAGGCCTACGAGCAGTACTTC	TRBV12-3	TRBD2	TRBJ2-7	TRBV12	TRBJ2	CASSPAGGEAYEQYF	TGTGCCAGCAGTCCCGCGGGAGGGGAGGCCTACGAGCAGTACTTC	:::::::::0::12:15::24:24:28::45:::
1734	TGTGCCAGCAGTCGTGGACAGGGTTACGAGCAGTACTTC	TRBV6-2	TRBD1	TRBJ2-7	TRBV6	TRBJ2	CASSRGQGYEQYF	TGTGCCAGCAGTCGTGGACAGGGTTACGAGCAGTACTTC	:::::::::0::12:15:::23:24::39:::
1735	TGTGCCAGCAGTCTCAACCCCGGGACAGATACGCAGTATTTT	TRBV27	TRBD1	TRBJ2-3	TRBV27*00	TRBJ2	CASSLNPGTDTQYF	TGTGCCAGCAGTCTCAACCCCGGGACAGATACGCAGTATTTT	:::::::::0::12:18:21::24:24::42:::
1736	TGTGCCAGCAGTGAAGCAGGAGCCTACGAGCAGTACGTC	TRBV6-1		TRBJ2-7	TRBV6	TRBJ2	CASSEAGAYEQYV	TGTGCCAGCAGTGAAGCAGGAGCCTACGAGCAGTACGTC	:::::::::0:17:17:::::17:22:39:::
1737	TGTGCCAGCAGTGAAGCGGTACAGGGCACGGGTTACGAGCAGTACGTC	TRBV6-1	TRBD1	TRBJ2-7	TRBV6	TRBJ2	CASSEAVQGTGYEQYV	TGTGCCAGCAGTGAAGCGGTACAGGGCACGGGTTACGAGCAGTACGTC	:::::::::0:17:18:20:::26:33::48:::
1738	TGTGCCAGCAGTGAAGCTCCAGGCAATCAGCCCCAGCATTTT	TRBV2		TRBJ1-5	TRBV2*00	TRBJ1	CASSEAPGNQPQHF	TGTGCCAGCAGTGAAGCTCCAGGCAATCAGCCCCAGCATTTT	:::::::::0:17:17:::::22::42:::
1739	TGTGCCAGCAGTGAAGGGGGGGCCTACGAGCAGTACTTC	TRBV6-1	TRBD1	TRBJ2-7	TRBV6	TRBJ2	CASSEGGAYEQYF	TGTGCCAGCAGTGAAGGGGGGGCCTACGAGCAGTACTTC	:::::::::0::16:16:::21:22::39:::
1740	TGTGCCAGCAGTGAGCAGGGGGCTTATGGCTACACCTTC	TRBV6-1	TRBD1	TRBJ1-2	TRBV6	TRBJ1	CASSEQGAYGYTF	TGTGCCAGCAGTGAGCAGGGGGCTTATGGCTACACCTTC	:::::::::0::14:15::23:23:24::39:::
1741	TGTGCCAGCAGTGATATATCTGAGAGTAGAGGCTACACCTTC	TRBV25-1		TRBJ1-2	TRBV25	TRBJ1	CASSDISESRGYTF	TGTGCCAGCAGTGATATATCTGAGAGTAGAGGCTACACCTTC	:::::::::0:16:19:::::30::42:::
1742	TGTGCCAGCAGTGATTCAGGGACGGGCAGCTATGGCTACACCTTC	TRBV6-1	TRBD1	TRBJ1-2	TRBV6	TRBJ1	CASSDSGTGSYGYTF	TGTGCCAGCAGTGATTCAGGGACGGGCAGCTATGGCTACACCTTC	:::::::::0::14:18:18::26:29::45:::
1743	TGTGCCAGCAGTGCCGGGACAGGTCAAAGCTATGGCTACACCTTC	TRBV6-1	TRBD1	TRBJ1-2	TRBV6	TRBJ1	CASSAGTGQSYGYTF	TGTGCCAGCAGTGCCGGGACAGGTCAAAGCTATGGCTACACCTTC	:::::::::0::13:13:15::23:29::45:::
1744	TGTGCCAGCAGTGGGGGAGAGGCTTACGAGCAGTACGTC	TRBV6-1	TRBD2	TRBJ2-7	TRBV6	TRBJ2	CASSGGEAYEQYV	TGTGCCAGCAGTGGGGGAGAGGCTTACGAGCAGTACGTC	:::::::::0::13:14::22:23:24::39:::
1745	TGTGCCAGCAGTGTAAATGGGGCAGTTGAGCAGTTCTTC	TRBV27	TRBD1	TRBJ2-1	TRBV27*00	TRBJ2	CASSVNGAVEQFF	TGTGCCAGCAGTGTAAATGGGGCAGTTGAGCAGTTCTTC	:::::::::0::15:18::23:23:26::39:::
1746	TGTGCCAGCAGTGTTTCGGGAAATCAGCCCCAGCATTTT	TRBV25-1	TRBD1	TRBJ1-5	TRBV25	TRBJ1	CASSVSGNQPQHF	TGTGCCAGCAGTGTTTCGGGAAATCAGCCCCAGCATTTT	:::::::::0::13:16:17::21:21::39:::
1747	TGTGCCAGCAGTTACCTGGTTTCCTACGAGCAGTACTTC	TRBV6-2		TRBJ2-7	TRBV6	TRBJ2	CASSYLVSYEQYF	TGTGCCAGCAGTTACCTGGTTTCCTACGAGCAGTACTTC	:::::::::0::15:::::21::39:::
1748	TGTGCCAGCAGTTACGAGAGGGGCGGCACTGAAGCTTTCTTT	TRBV6-5	TRBD1	TRBJ1-1	TRBV6	TRBJ1	CASSYERGGTEAFF	TGTGCCAGCAGTTACGAGAGGGGCGGCACTGAAGCTTTCTTT	:::::::::0::15:19::24:25:26::42:::
1749	TGTGCCAGCAGTTACGGTGAGGCTTATGGCTACACCTTC	TRBV6-5		TRBJ1-2	TRBV6	TRBJ1	CASSYGEAYGYTF	TGTGCCAGCAGTTACGGTGAGGCTTATGGCTACACCTTC	:::::::::0::15:::::24::39:::
1750	TGTGCCAGCAGTTACGTGACGGCGGGGGCCTATGGCTACACCTTC	TRBV6-5	TRBD1	TRBJ1-2	TRBV6	TRBJ1	CASSYVTAGAYGYTF	TGTGCCAGCAGTTACGTGACGGCGGGGGCCTATGGCTACACCTTC	:::::::::0::15:23::29:29:29::45:::
1751	TGTGCCAGCAGTTACTCAACCACAGGGGGCGCAAACACTGAAGCTTTCTTT	TRBV6-5	TRBD1	TRBJ1-1	TRBV6	TRBJ1	CASSYSTTGGANTEAFF	TGTGCCAGCAGTTACTCAACCACAGGGGGCGCAAACACTGAAGCTTTCTTT	:::::::::0:17:17:21::30:32:33::51:::
1752	TGTGCCAGCAGTTACTCCCCGGCGGGTGAAAGTCGCTTC	TRBV6-2	TRBD1	TRBJ2-7	TRBV6	TRBJ2	CASSYSPAGESRF	TGTGCCAGCAGTTACTCCCCGGCGGGTGAAAGTCGCTTC	:::::::::0:17:17:17:20::22:35::39:::
1753	TGTGCCAGCAGTTACTCCGGGACAGGGCGCTACGAGCAGTACTTC	TRBV6-5	TRBD1	TRBJ2-7	TRBV6	TRBJ2	CASSYSGTGRYEQYF	TGTGCCAGCAGTTACTCCGGGACAGGGCGCTACGAGCAGTACTTC	:::::::::0:17:17:17:18::27:29::45:::
1754	TGTGCCAGCAGTTACTCGAACACAGCCTACGAGCAGTACTTC	TRBV6-5		TRBJ2-7	TRBV6	TRBJ2	CASSYSNTAYEQYF	TGTGCCAGCAGTTACTCGAACACAGCCTACGAGCAGTACTTC	:::::::::0:17:19:::::25::42:::
1755	TGTGCCAGCAGTTACTCGCAGGGGTACGAGCAGTACTTC	TRBV6-5	TRBD1	TRBJ2-7	TRBV6	TRBJ2	CASSYSQGYEQYF	TGTGCCAGCAGTTACTCGCAGGGGTACGAGCAGTACTTC	:::::::::0:17:18:18:::24:24::39:::
1756	TGTGCCAGCAGTTACTCGGCAGCCTATGGCTACACCTTC	TRBV6-2		TRBJ1-2	TRBV6	TRBJ1	CASSYSAAYGYTF	TGTGCCAGCAGTTACTCGGCAGCCTATGGCTACACCTTC	:::::::::0:17:18:::::23::39:::
1757	TGTGCCAGCAGTTACTGGGGGGATCAGCCCCAGCATTTT	TRBV6-2	TRBD1	TRBJ1-5	TRBV6	TRBJ1	CASSYWGDQPQHF	TGTGCCAGCAGTTACTGGGGGGATCAGCCCCAGCATTTT	:::::::::0::16:16:::21:22::39:::
1758	TGTGCCAGCAGTTATGGCAGTTACGAGCAGTACTTC	TRBV6-6		TRBJ2-7	TRBV6	TRBJ2	CASSYGSYEQYF	TGTGCCAGCAGTTATGGCAGTTACGAGCAGTACTTC	:::::::::0::14:::::21::36:::
1759	TGTGCCAGCAGTTCAGGGGGCGGCCAGCCCCAGTATTTT	TRBV28	TRBD1	TRBJ1-5	TRBV28*00	TRBJ1	CASSSGGGQPQYF	TGTGCCAGCAGTTCAGGGGGCGGCCAGCCCCAGTATTTT	:::::::::0::13:13::21:22:24::39:::
1760	TGTGCCAGCAGTTCCGCAGGAGCCTACGAGCAGTACGTC	TRBV6-2		TRBJ2-7	TRBV6	TRBJ2	CASSSAGAYEQYV	TGTGCCAGCAGTTCCGCAGGAGCCTACGAGCAGTACGTC	:::::::::0::13:::::14:22:39:::
1761	TGTGCCAGCAGTTCGGGGGTGAACACTGAAGCTTTCTTT	TRBV27	TRBD1	TRBJ1-1	TRBV27*00	TRBJ1	CASSSGVNTEAFF	TGTGCCAGCAGTTCGGGGGTGAACACTGAAGCTTTCTTT	:::::::::0::13:14:::19:19:19:39:::
1762	TGTGCCAGCAGTTCGTCCACTAGCGCGTACGAGCAGTACTTC	TRBV27		TRBJ2-7	TRBV27*00	TRBJ2	CASSSSTSAYEQYF	TGTGCCAGCAGTTCGTCCACTAGCGCGTACGAGCAGTACTTC	:::::::::0::13:::::21:23:42:::
1763	TGTGCCAGCAGTTTAAGGTCTTACAATGAGCAGTTCTTC	TRBV27		TRBJ2-1	TRBV27*00	TRBJ2	CASSLRSYNEQFF	TGTGCCAGCAGTTTAAGGTCTTACAATGAGCAGTTCTTC	:::::::::0::15:::::15:17:39:::
1764	TGTGCCAGCAGTTTAATCCAGGGGGGTACAGGGGTGCAGTACTTC	TRBV27	TRBD1	TRBJ2-7	TRBV27*00	TRBJ2	CASSLIQGGTGVQYF	TGTGCCAGCAGTTTAATCCAGGGGGGTACAGGGGTGCAGTACTTC	:::::::::0::15:23:23::34:35::45:::
1765	TGTGCCAGCAGTTTAATTACAGGGGCTAGCACAGATACGCAGTATTTT	TRBV27	TRBD1	TRBJ2-3	TRBV27*00	TRBJ2	CASSLITGASTDTQYF	TGTGCCAGCAGTTTAATTACAGGGGCTAGCACAGATACGCAGTATTTT	:::::::::0::15:18:::24:24:27:48:::
1766	TGTGCCAGCAGTTTACAGGGATCCTACGAGCAGTACTTC	TRBV12-3	TRBD1	TRBJ2-7	TRBV12	TRBJ2	CASSLQGSYEQYF	TGTGCCAGCAGTTTACAGGGATCCTACGAGCAGTACTTC	:::::::::0::15:15:::20:21::39:::
1767	TGTGCCAGCAGTTTCCAGGTGCCTAACTATGGCTACACCTTC	TRBV28		TRBJ1-2	TRBV28*00	TRBJ1	CASSFQVPNYGYTF	TGTGCCAGCAGTTTCCAGGTGCCTAACTATGGCTACACCTTC	:::::::::0::14:::::22:22:42:::
1768	TGTGCCAGCAGTTTCTCAGGCGCCTACGAGCAGTACTTC	TRBV6-2		TRBJ2-7	TRBV6	TRBJ2	CASSFSGAYEQYF	TGTGCCAGCAGTTTCTCAGGCGCCTACGAGCAGTACTTC	:::::::::0:17:17:::::19:20:39:::
1769	TGTGCCAGCAGTTTTTCCGGGACAGGGAATCAGCCCCAGCATTTT	TRBV27	TRBD1	TRBJ1-5	TRBV27*00	TRBJ1	CASSFSGTGNQPQHF	TGTGCCAGCAGTTTTTCCGGGACAGGGAATCAGCCCCAGCATTTT	:::::::::0:17:17:17:18::27:27::45:::
1770	TGTGCCAGCATCCCGGCAGGGGGCTACGAGCAGTACGTC	TRBV11-2	TRBD1	TRBJ2-7	TRBV11	TRBJ2	CASIPAGGYEQYV	TGTGCCAGCATCCCGGCAGGGGGCTACGAGCAGTACGTC	:::::::::0::10:10:14::23:23::39:::
1771	TGTGCCAGCCGGGGGGGGCCGGGGAATGAGCAGTTCTTC	TRBV6-5	TRBD1	TRBJ2-1	TRBV6	TRBJ2	CASRGGPGNEQFF	TGTGCCAGCCGGGGGGGGCCGGGGAATGAGCAGTTCTTC	:::::::::0::9:11::17:20:24::39:::
1772	TGTGCCAGCGGAAAGGCGGCCGGCTACGAGCAGTACGTC	TRBV6-2	TRBD1	TRBJ2-7	TRBV6	TRBJ2	CASGKAAGYEQYV	TGTGCCAGCGGAAAGGCGGCCGGCTACGAGCAGTACGTC	:::::::::0::9:9::20:20:23::39:::
1773	TGTGCCAGCGGGGCAGGCCTAAGCTACGAGCAGTACTTC	TRBV6-2	TRBD1	TRBJ2-7	TRBV6	TRBJ2	CASGAGLSYEQYF	TGTGCCAGCGGGGCAGGCCTAAGCTACGAGCAGTACTTC	:::::::::0::9:9:9::17:23::39:::
1774	TGTGCCAGCTTAACCCCAGGCTCCTACGAGCAGTACTTC	TRBV6-1		TRBJ2-7	TRBV6	TRBJ2	CASLTPGSYEQYF	TGTGCCAGCTTAACCCCAGGCTCCTACGAGCAGTACTTC	:::::::::0::9:::::19:20:39:::
1775	TGTGCCAGGAGCGCGTCTGGGATAGGTGAGCAGTACTTC	TRBV5-5	TRBD1	TRBJ2-7	TRBV5	TRBJ2	CARSASGIGEQYF	TGTGCCAGGAGCGCGTCTGGGATAGGTGAGCAGTACTTC	:::::::::0::12:18:18::26:27::39:::
1776	TGTGCCAGTAGATGGGGTGGTAATTCACCCCTCCACTTT	TRBV19		TRBJ1-6	TRBV19*00	TRBJ1	CASRWGGNSPLHF	TGTGCCAGTAGATGGGGTGGTAATTCACCCCTCCACTTT	:::::::::0::11:::::20::39:::
1777	TGTGCCAGTAGTACTCCGACAGGGGGATATGGCTACACCTTC	TRBV19	TRBD1	TRBJ1-2	TRBV19*00	TRBJ1	CASSTPTGGYGYTF	TGTGCCAGTAGTACTCCGACAGGGGGATATGGCTACACCTTC	:::::::::0::13:17:::26:27::42:::
1778	TGTGCCAGTAGTGAAAACGGACAGACTGAAGCTTTCTTT	TRBV6-1	TRBD1	TRBJ1-1	TRBV6	TRBJ1	CASSENGQTEAFF	TGTGCCAGTAGTGAAAACGGACAGACTGAAGCTTTCTTT	:::::::::0::15:18:::24:24::39:::
1779	TGTGCCAGTTCGGCTAGCGGGGCGTACGAGCAGTACTTC	TRBV6-2	TRBD2	TRBJ2-7	TRBV6	TRBJ2	CASSASGAYEQYF	TGTGCCAGTTCGGCTAGCGGGGCGTACGAGCAGTACTTC	:::::::::0::8:13:::21:24::39:::
1780	TGTGCCATCACGGGCGGGGGGGCGTATGAGCAGTTCTTC	TRBV10-3	TRBD2	TRBJ2-1	TRBV10	TRBJ2	CAITGGGAYEQFF	TGTGCCATCACGGGCGGGGGGGCGTATGAGCAGTTCTTC	:::::::::0::10:13::22:23:25::39:::
1781	TGTGCCATCAGTGAATGTACACTGGGTGAAGCTTTCTTT	TRBV10-3		TRBJ1-1	TRBV10	TRBJ1	CAISECTLGEAFF	TGTGCCATCAGTGAATGTACACTGGGTGAAGCTTTCTTT	:::::::::0::14:::::26::39:::
1782	TGTGCCATCAGTGAGTCTGAGGGGGCGAGAGGCTACACCTTC	TRBV10-3	TRBD1	TRBJ1-2	TRBV10	TRBJ1	CAISESEGARGYTF	TGTGCCATCAGTGAGTCTGAGGGGGCGAGAGGCTACACCTTC	:::::::::0:17:17:19::26:27:30::42:::
1783	TGTGCCATCAGTGCGGGGGAAGGCTACGAGCAGTACTTC	TRBV10-3	TRBD1	TRBJ2-7	TRBV10	TRBJ2	CAISAGEGYEQYF	TGTGCCATCAGTGCGGGGGAAGGCTACGAGCAGTACTTC	:::::::::0::13:14:::19:23::39:::
1784	TGTGCCATCAGTGTCGAGGGGACAGGCCTGGGATCTGGCTACACCTTC	TRBV10-3	TRBD1	TRBJ1-2	TRBV10	TRBJ1	CAISVEGTGLGSGYTF	TGTGCCATCAGTGTCGAGGGGACAGGCCTGGGATCTGGCTACACCTTC	:::::::::0::13:18:18::26:35::48:::
1785	TGTGCCATCGGGACTAGCGGTTCCGACGAGCAGTACTTC	TRBV2	TRBD2	TRBJ2-7	TRBV2*00	TRBJ2	CAIGTSGSDEQYF	TGTGCCATCGGGACTAGCGGTTCCGACGAGCAGTACTTC	:::::::::0::7:8:9::20:21::39:::
1786	TGTGCCTCTGGGAATAGCGGGGCCTACGAGCAGTACTTC	TRBV19	TRBD2	TRBJ2-7	TRBV19*00	TRBJ2	CASGNSGAYEQYF	TGTGCCTCTGGGAATAGCGGGGCCTACGAGCAGTACTTC	:::::::::0::6:9:9::21:22::39:::
1787	TGTGCCTGGGGAGCGGGGGGCGCGTACGAGCAGTACTTC	TRBV30	TRBD1	TRBJ2-7	TRBV30*00	TRBJ2	CAWGAGGAYEQYF	TGTGCCTGGGGAGCGGGGGGCGCGTACGAGCAGTACTTC	:::::::::0::9:15::21:23:24::39:::
1788	TGTGCTAGCAGCTTAGAGCGGGGGCCGTACTACGAGCCGTACTTC	TRBV7-6	TRBD1	TRBJ2-7	TRBV7	TRBJ2	CASSLERGPYYEPYF	TGTGCTAGCAGCTTAGAGCGGGGGCCGTACTACGAGCCGTACTTC	:::::::::0:17:19:19::25:25:29::45:::
1789	TGTGGCAGCAGCCAAGATTCCCCAGGCTACAATGAGCAGTTCTTC	TRBV3-1		TRBJ2-1	TRBV3	TRBJ2	CGSSQDSPGYNEQFF	TGTGGCAGCAGCCAAGATTCCCCAGGCTACAATGAGCAGTTCTTC	:::::::::0:17:18:::::26::45:::
1790	TTTGCCAGCAGCGTAGGTGCAGGGGCAGCGACCACTGAAGCGTTCTTT	TRBV7-6	TRBD1	TRBJ1-1	TRBV7	TRBJ1	FASSVGAGAATTEAFF	TTTGCCAGCAGCGTAGGTGCAGGGGCAGCGACCACTGAAGCGTTCTTT	:::::::::0::16:19:::25:29::48:::

## Sheet: NS4B+ TCRalpha donor P30
	CDR3.nucleotide.sequence	bestVGene	bestDGene	bestJGene	bestVFamily	bestJFamily	CDR3.amino.acid.sequence	nSeqCDR3	refPoints
1	TCTTTAAAGGGCATGCGCTTT	TRAV5		TRAJ43	TRAV5	TRAJ43	SLKGMRF	TCTTTAAAGGGCATGCGCTTT	:::::::::0:-12:1:::::11:-13:21:::
2	TGCCTCGTGGGTGACAAGCCGCATGACATGCGCTTT	TRAV4		TRAJ43	TRAV4	TRAJ43	CLVGDKPHDMRF	TGCCTCGTGGGTGACAAGCCGCATGACATGCGCTTT	:::::::::0:0:16:::::22:-9:36:::
3	TGCGCTGTGAGACCTAATAACTATGGTCAGAATTTTGTCTTT	TRAV1-1		TRAJ26	TRAV1	TRAJ26	CAVRPNNYGQNFVF	TGCGCTGTGAGACCTAATAACTATGGTCAGAATTTTGTCTTT	:::::::::0:-2:12:::::16:-3:42:::
4	TGCGCTGTGAGAGATCCGGGTGCTACAAACAAGCTCATCTTT	TRAV1-1		TRAJ32	TRAV1	TRAJ32	CAVRDPGATNKLIF	TGCGCTGTGAGAGATCCGGGTGCTACAAACAAGCTCATCTTT	:::::::::0:2:16:::::18:-11:42:::
5	TGCGCTGTGAGAGGGCCAAATTCTGGGGGTTACCAGAAAGTTACCTTT	TRAV1-1		TRAJ13	TRAV1	TRAJ13	CAVRGPNSGGYQKVTF	TGCGCTGTGAGAGGGCCAAATTCTGGGGGTTACCAGAAAGTTACCTTT	:::::::::0:-1:13:::::18:-2:48:::
6	TGCGCTGTGGGCTATGGGAACAACAGACTCGCTTTT	TRAV1-1		TRAJ7	TRAV1	TRAJ7	CAVGYGNNRLAF	TGCGCTGTGGGCTATGGGAACAACAGACTCGCTTTT	:::::::::0:-5:9:::::11:-3:36:::
7	TGTACCGCCTCGATTAACACCGACAAGCTCATCTTT	TRAV12-2		TRAJ34	TRAV12	TRAJ34	CTASINTDKLIF	TGTACCGCCTCGATTAACACCGACAAGCTCATCTTT	:::::::::0:-6:7:::::14:-5:36:::
8	TGTGCACCAGGAGGAGGAGGTGCTGACGGACTCACCTTT	TRAV13-2		TRAJ45	TRAV13	TRAJ45	CAPGGGGADGLTF	TGTGCACCAGGAGGAGGAGGTGCTGACGGACTCACCTTT	:::::::::0:-7:6:::::11:-7:39:::
9	TGTGCAGAAATTTATGGAAACAAGCTGGTCTTT	TRAV27		TRAJ47	TRAV27	TRAJ47	CAEIYGNKLVF	TGTGCAGAAATTTATGGAAACAAGCTGGTCTTT	:::::::::0:-3:7:::::12:-5:33:::
10	TGTGCAGAGAATTTAGGCACCGGTAACCAGTTCTATTTT	TRAV13-2		TRAJ49	TRAV13	TRAJ49	CAENLGTGNQFYF	TGTGCAGAGAATTTAGGCACCGGTAACCAGTTCTATTTT	:::::::::0:-1:12:::::17:-3:39:::
11	TGTGCAGAGAGTCATACGGGGTACAGCAGTGCTTCCAAGATAATCTTT	TRAV5		TRAJ3	TRAV5	TRAJ3	CAESHTGYSSASKIIF	TGTGCAGAGAGTCATACGGGGTACAGCAGTGCTTCCAAGATAATCTTT	:::::::::0:-1:12:::::16:1:48:::
12	TGTGCAGATCTAGAAGGAAACACACCTCTTGTCTTT	TRAV13-2		TRAJ29	TRAV13	TRAJ29	CADLEGNTPLVF	TGTGCAGATCTAGAAGGAAACACACCTCTTGTCTTT	:::::::::0:-5:8:::::14:-7:36:::
13	TGTGCAGCAAACGATAACACCGACAAGCTCATCTTT	TRAV29DV5		TRAJ34	TRAV29	TRAJ34	CAANDNTDKLIF	TGTGCAGCAAACGATAACACCGACAAGCTCATCTTT	:::::::::0:-3:10:::::13:-4:36:::
14	TGTGCAGCAAGGCAATGGGGAGGTGCTGACGGACTCACCTTT	TRAV23DV6		TRAJ45	TRAV23	TRAJ45	CAARQWGGADGLTF	TGTGCAGCAAGGCAATGGGGAGGTGCTGACGGACTCACCTTT	:::::::::0:-2:11:::::18:-11:42:::
15	TGTGCAGCAAGTGATTACTTTGGAAATGAGAAATTAACCTTT	TRAV13-1		TRAJ48	TRAV13	TRAJ48	CAASDYFGNEKLTF	TGTGCAGCAAGTGATTACTTTGGAAATGAGAAATTAACCTTT	:::::::::0:-1:12:::::16:-6:42:::
16	TGTGCAGCAAGTGCGGGAGGAAGCCAAGGAAATCTCATCTTT	TRAV23DV6		TRAJ42	TRAV23	TRAJ42	CAASAGGSQGNLIF	TGTGCAGCAAGTGCGGGAGGAAGCCAAGGAAATCTCATCTTT	:::::::::0:-2:11:::::15:-8:42:::
17	TGTGCAGCAGAAGGTGGTACTAGCTATGGAAAGCTGACATTT	TRAV29DV5		TRAJ52	TRAV29	TRAJ52	CAAEGGTSYGKLTF	TGTGCAGCAGAAGGTGGTACTAGCTATGGAAAGCTGACATTT	:::::::::0:-4:9:::::12:-8:42:::
18	TGTGCAGCCCTCGAAACCCTTGGCTCTAGCAACACAGGCAAACTAATCTTT	TRAV13-1	TRDD1	TRAJ37	TRAV13	TRAJ37	CAALETLGSSNTGKLIF	TGTGCAGCCCTCGAAACCCTTGGCTCTAGCAACACAGGCAAACTAATCTTT	:::::::::0:-5:8:10:2:-4:16:20:0:51:::
19	TGTGCAGCGTCGGGCAGGAGAGCACTTACTTTT	TRAV13-1		TRAJ5	TRAV13	TRAJ5	CAASGRRALTF	TGTGCAGCGTCGGGCAGGAGAGCACTTACTTTT	:::::::::0:-5:8:::::10:-6:33:::
20	TGTGCAGCTAAGCGGGGAGGAAAGCTTATCTTC	TRAV29DV5		TRAJ23	TRAV29	TRAJ23	CAAKRGGKLIF	TGTGCAGCTAAGCGGGGAGGAAAGCTTATCTTC	:::::::::0:0:14:::::14:-13:33:::
21	TGTGCAGCTTATTATGGCCAGAAGCTGCTCTTT	TRAV13-1		TRAJ16	TRAV13	TRAJ16	CAAYYGQKLLF	TGTGCAGCTTATTATGGCCAGAAGCTGCTCTTT	:::::::::0:-5:8:::::13:-9:33:::
22	TGTGCAGGAGCCGACACCTTTTCAGATGGCCAGAAGCTGCTCTTT	TRAV27		TRAJ16	TRAV27	TRAJ16	CAGADTFSDGQKLLF	TGTGCAGGAGCCGACACCTTTTCAGATGGCCAGAAGCTGCTCTTT	:::::::::0:1:11:::::18:-2:45:::
23	TGTGCAGGAGTGGGCTCTAGCAACACAGGCAAACTAATCTTT	TRAV27		TRAJ37	TRAV27	TRAJ37	CAGVGSSNTGKLIF	TGTGCAGGAGTGGGCTCTAGCAACACAGGCAAACTAATCTTT	:::::::::0:0:10:::::12:-1:42:::
24	TGTGCAGTCCTATCAGGAGGAAGCTACATACCTACATTT	TRAV5		TRAJ6	TRAV5	TRAJ6	CAVLSGGSYIPTF	TGTGCAGTCCTATCAGGAGGAAGCTACATACCTACATTT	:::::::::0:-6:7:::::11:-3:39:::
25	TGTGCAGTCTTTCCCAACACCAATGCAGGCAAATCAACCTTT	TRAV12-2		TRAJ27	TRAV12	TRAJ27	CAVFPNTNAGKSTF	TGTGCAGTCTTTCCCAACACCAATGCAGGCAAATCAACCTTT	:::::::::0:-8:5:::::15:-1:42:::
26	TGTGCAGTGACGAAGGAGAATAGAGGCTCAACCCTGGGGGGGCTATACTTT	TRAV12-2	TRDD2	TRAJ18	TRAV12	TRAJ18	CAVTKENRGSTLGGLYF	TGTGCAGTGACGAAGGAGAATAGAGGCTCAACCCTGGGGGGGCTATACTTT	:::::::::0:-3:10:11:5:-9:16:21:-5:51:::
27	TGTGCCATGACGGGAACCTACAAATACATCTTT	TRAV12-2		TRAJ40	TRAV12	TRAJ40	CAMTGTYKYIF	TGTGCCATGACGGGAACCTACAAATACATCTTT	:::::::::0:-3:10:::::12:-9:33:::
28	TGTGCCCCAAAGGGTGGAGGCTTCAAAACTATCTTT	TRAV13-1		TRAJ9	TRAV13	TRAJ9	CAPKGGGFKTIF	TGTGCCCCAAAGGGTGGAGGCTTCAAAACTATCTTT	:::::::::0:-8:5:::::14:-8:36:::
29	TGTGCCCCAGGAAGCCAAGGAAATCTCATCTTT	TRAV25		TRAJ42	TRAV25	TRAJ42	CAPGSQGNLIF	TGTGCCCCAGGAAGCCAAGGAAATCTCATCTTT	:::::::::0:-4:5:::::8:-10:33:::
30	TGTGCCCCAGTTGGAGGAAAGCTTATCTTC	TRAV12-2	TRDD3	TRAJ23	TRAV12	TRAJ23	CAPVGGKLIF	TGTGCCCCAGTTGGAGGAAAGCTTATCTTC	:::::::::0:-7:6:6:5:-13:11:12:-14:30:::
31	TGTGCCGCCAAATACATGTATTCAGGAGGAGGTGCTGACGGACTCACCTTT	TRAV12-2		TRAJ45	TRAV12	TRAJ45	CAAKYMYSGGGADGLTF	TGTGCCGCCAAATACATGTATTCAGGAGGAGGTGCTGACGGACTCACCTTT	:::::::::0:-6:7:::::10:6:51:::
32	TGTGCCGCCAAATACATGTATTCAGGAGGAGGTGCTGACGGACTCCTGTCT	TRAV12-2		TRAJ45	TRAV12	TRAJ45	CAAKYMYSGGGADGLLS	TGTGCCGCCAAATACATGTATTCAGGAGGAGGTGCTGACGGACTCCTGTCT	:::::::::0:-6:7:::::10:6:51:::
33	TGTGCCGCCAGTGCTTCCAAGATAATCTTT	TRAV12-2		TRAJ3	TRAV12	TRAJ3	CAASASKIIF	TGTGCCGCCAGTGCTTCCAAGATAATCTTT	:::::::::0:-6:7:::::8:-9:30:::
34	TGTGCCGCCGCAGACAGCACCCTCACCTTT	TRAV12-2		TRAJ11	TRAV12	TRAJ11	CAAADSTLTF	TGTGCCGCCGCAGACAGCACCCTCACCTTT	:::::::::0:-6:7:::::13:-12:30:::
35	TGTGCCGCCTCGATTAACACCGACAAGCTCATCTTT	TRAV12-2		TRAJ34	TRAV12	TRAJ34	CAASINTDKLIF	TGTGCCGCCTCGATTAACACCGACAAGCTCATCTTT	:::::::::0:-6:7:::::14:-5:36:::
36	TGTGCCGGCGGAGATGACAAGATCATCTTT	TRAV12-2		TRAJ30	TRAV12	TRAJ30	CAGGDDKIIF	TGTGCCGGCGGAGATGACAAGATCATCTTT	:::::::::0:-6:7:::::10:-6:30:::
37	TGTGCCGGGAACAATGCCAGACTCATGTTT	TRAV12-2		TRAJ31	TRAV12	TRAJ31	CAGNNARLMF	TGTGCCGGGAACAATGCCAGACTCATGTTT	:::::::::0:0:13:::::9:-5:30:::
38	TGTGCCGGTCCCGGCGACGGACTCACCTTT	TRAV12-2		TRAJ45	TRAV12	TRAJ45	CAGPGDGLTF	TGTGCCGGTCCCGGCGACGGACTCACCTTT	:::::::::0:-6:7:::::15:-20:30:::
39	TGTGCCGTAGGAGGAAGCTACATACCTACATTT	TRAV12-2		TRAJ6	TRAV12	TRAJ6	CAVGGSYIPTF	TGTGCCGTAGGAGGAAGCTACATACCTACATTT	:::::::::0:-5:8:::::8:-6:33:::
40	TGTGCCGTATCCAATGACAAGATCATCTTT	TRAV12-2		TRAJ30	TRAV12	TRAJ30	CAVSNDKIIF	TGTGCCGTATCCAATGACAAGATCATCTTT	:::::::::0:-5:8:::::13:-9:30:::
41	TGTGCCGTCTTTCCCAACACCAATGCAGGCAAATCAACCTTT	TRAV12-2		TRAJ27	TRAV12	TRAJ27	CAVFPNTNAGKSTF	TGTGCCGTCTTTCCCAACACCAATGCAGGCAAATCAACCTTT	:::::::::0:-5:8:::::15:-1:42:::
42	TGTGCCGTGAAAAATAACAATGTCAGACTCATGTTT	TRAV12-2		TRAJ31	TRAV12	TRAJ31	CAVKNNNVRLMF	TGTGCCGTGAAAAATAACAATGTCAGACTCATGTTT	:::::::::0:-2:11:::::12:-2:36:::
43	TGTGCCGTGAACAGTCGGTCTGACAGCTGGGGGAAATTGCAGTTT	TRAV12-2		TRAJ24	TRAV12	TRAJ24	CAVNSRSDSWGKLQF	TGTGCCGTGAACAGTCGGTCTGACAGCTGGGGGAAATTGCAGTTT	:::::::::0:0:13:::::19:-6:45:::
44	TGTGCCGTGAACGCTGACAAGATCATCTTT	TRAV12-2		TRAJ30	TRAV12	TRAJ30	CAVNADKIIF	TGTGCCGTGAACGCTGACAAGATCATCTTT	:::::::::0:-1:12:::::14:-10:30:::
45	TGTGCCGTGAACGGGGACAGCTTTCAGAAACTTGTATTT	TRAV12-2	TRDD3	TRAJ8	TRAV12	TRAJ8	CAVNGDSFQKLVF	TGTGCCGTGAACGGGGACAGCTTTCAGAAACTTGTATTT	:::::::::0:-1:12:12:-4:-4:17:19:-9:39:::
46	TGTGCCGTGACATCAGGATACAGCACCCTCACCTTT	TRAV12-2		TRAJ11	TRAV12	TRAJ11	CAVTSGYSTLTF	TGTGCCGTGACATCAGGATACAGCACCCTCACCTTT	:::::::::0:-3:10:::::12:-5:36:::
47	TGTGCCGTGACCAGTGGCTCTAGGTTGACCTTT	TRAV12-2		TRAJ58	TRAV12	TRAJ58	CAVTSGSRLTF	TGTGCCGTGACCAGTGGCTCTAGGTTGACCTTT	:::::::::0:-3:10:::::9:-8:33:::
48	TGTGCCGTGACCCCCCACGACAAGCTCATCTTT	TRAV12-2	TRDD3	TRAJ34	TRAV12	TRAJ34	CAVTPHDKLIF	TGTGCCGTGACCCCCCACGACAAGCTCATCTTT	:::::::::0:-3:10:11:8:-15:17:17:-11:33:::
49	TGTGCCGTGACCCTTCGTTCAGGAAACACACCTCTTGTCTTT	TRAV12-2	TRDD2	TRAJ29	TRAV12	TRAJ29	CAVTLRSGNTPLVF	TGTGCCGTGACCCTTCGTTCAGGAAACACACCTCTTGTCTTT	:::::::::0:-3:10:11:0:-4:16:17:-4:42:::
50	TGTGCCGTGACGCCAGGAACTACTCTGATCTTT	TRAV12-2		TRAJ15	TRAV12	TRAJ15	CAVTPGTTLIF	TGTGCCGTGACGCCAGGAACTACTCTGATCTTT	:::::::::0:-3:10:::::13:-9:33:::
51	TGTGCCGTGACGCCAGGAACTGCTCTGATCTTT	TRAV12-2		TRAJ15	TRAV12	TRAJ15	CAVTPGTALIF	TGTGCCGTGACGCCAGGAACTGCTCTGATCTTT	:::::::::0:-3:10:::::13:-9:33:::
52	TGTGCCGTGACGGGAACCTACAAATACATCTTT	TRAV12-2		TRAJ40	TRAV12	TRAJ40	CAVTGTYKYIF	TGTGCCGTGACGGGAACCTACAAATACATCTTT	:::::::::0:-3:10:::::12:-9:33:::
53	TGTGCCGTGACTAGAGCCAGACTCATGTTT	TRAV12-2		TRAJ31	TRAV12	TRAJ31	CAVTRARLMF	TGTGCCGTGACTAGAGCCAGACTCATGTTT	:::::::::0:-3:10:::::15:-11:30:::
54	TGTGCCGTGAGAGACAACTTCAACAAATTTTACTTT	TRAV8-1		TRAJ21	TRAV8	TRAJ21	CAVRDNFNKFYF	TGTGCCGTGAGAGACAACTTCAACAAATTTTACTTT	:::::::::0:-4:10:::::13:-1:36:::
55	TGTGCCGTGAGAGATGACAAGATCATCTTT	TRAV12-2		TRAJ30	TRAV12	TRAJ30	CAVRDDKIIF	TGTGCCGTGAGAGATGACAAGATCATCTTT	:::::::::0:-3:10:::::9:-5:30:::
56	TGTGCCGTGAGCCCTGGTGGCTACAATAAGCTGATTTTT	TRAV12-2		TRAJ4	TRAV12	TRAJ4	CAVSPGGYNKLIF	TGTGCCGTGAGCCCTGGTGGCTACAATAAGCTGATTTTT	:::::::::0:-3:10:::::13:-6:39:::
57	TGTGCCGTGAGCGGCGACAAGCTCATCTTT	TRAV12-2		TRAJ34	TRAV12	TRAJ34	CAVSGDKLIF	TGTGCCGTGAGCGGCGACAAGCTCATCTTT	:::::::::0:-3:10:::::14:-11:30:::
58	TGTGCCGTGAGTGCTTCCAAGATAATCTTT	TRAV12-2		TRAJ3	TRAV12	TRAJ3	CAVSASKIIF	TGTGCCGTGAGTGCTTCCAAGATAATCTTT	:::::::::0:-3:10:::::9:-10:30:::
59	TGTGCCGTGATAGGAGGAAAGCTTATCTTC	TRAV12-2		TRAJ23	TRAV12	TRAJ23	CAVIGGKLIF	TGTGCCGTGATAGGAGGAAAGCTTATCTTC	:::::::::0:-3:10:::::12:-14:30:::
60	TGTGCCGTGATCTCCGGCACTGCCAGTAAACTCACCTTT	TRAV12-2		TRAJ44	TRAV12	TRAJ44	CAVISGTASKLTF	TGTGCCGTGATCTCCGGCACTGCCAGTAAACTCACCTTT	:::::::::0:-3:10:::::13:-6:39:::
61	TGTGCCGTGGCGGATGACAAGATCATCTTT	TRAV12-2		TRAJ30	TRAV12	TRAJ30	CAVADDKIIF	TGTGCCGTGGCGGATGACAAGATCATCTTT	:::::::::0:-4:9:::::12:-8:30:::
62	TGTGCCGTGGGAGGCTTCAAAACTATCTTT	TRAV12-2		TRAJ9	TRAV12	TRAJ9	CAVGGFKTIF	TGTGCCGTGGGAGGCTTCAAAACTATCTTT	:::::::::0:-4:9:::::9:-9:30:::
63	TGTGCCGTGGGGGATGACAAGATCATCTTT	TRAV12-2		TRAJ30	TRAV12	TRAJ30	CAVGDDKIIF	TGTGCCGTGGGGGATGACAAGATCATCTTT	:::::::::0:-4:9:::::12:-8:30:::
64	TGTGCCGTGGTAGATGACAAGATCATCTTT	TRAV12-2		TRAJ30	TRAV12	TRAJ30	CAVVDDKIIF	TGTGCCGTGGTAGATGACAAGATCATCTTT	:::::::::0:-4:9:::::11:-7:30:::
65	TGTGCCGTGGTGGCAAGCAAACTAATCTTT	TRAV12-2		TRAJ37	TRAV12	TRAJ37	CAVVASKLIF	TGTGCCGTGGTGGCAAGCAAACTAATCTTT	:::::::::0:-4:9:::::16:-17:30:::
66	TGTGCCGTGTCAGATGACAAGATCATCTTT	TRAV12-2		TRAJ30	TRAV12	TRAJ30	CAVSDDKIIF	TGTGCCGTGTCAGATGACAAGATCATCTTT	:::::::::0:-4:9:::::11:-7:30:::
67	TGTGCCGTTAACAATGCCAGACTCATGTTT	TRAV12-2		TRAJ31	TRAV12	TRAJ31	CAVNNARLMF	TGTGCCGTTAACAATGCCAGACTCATGTTT	:::::::::0:0:13:::::8:-4:30:::
68	TGTGCCGTTGATGGTCAGAATTTTGTCTTT	TRAV12-2		TRAJ26	TRAV12	TRAJ26	CAVDGQNFVF	TGTGCCGTTGATGGTCAGAATTTTGTCTTT	:::::::::0:-5:8:::::10:-9:30:::
69	TGTGCCGTTTTCCCCGCTTTCCTCATCTTT	TRAV12-2	TRDD3	TRAJ34	TRAV12	TRAJ34	CAVFPAFLIF	TGTGCCGTTTTCCCCGCTTTCCTCATCTTT	:::::::::0:-5:8:10:9:-17:15:21:-18:30:::
70	TGTGCCTCCTCTAACGACTACAAGCTCAGCTTT	TRAV12-2		TRAJ20	TRAV12	TRAJ20	CASSNDYKLSF	TGTGCCTCCTCTAACGACTACAAGCTCAGCTTT	:::::::::0:-7:6:::::9:-2:33:::
71	TGTGCCTCCTCTAACGACTGCAAGCTCAGCTTT	TRAV12-2		TRAJ20	TRAV12	TRAJ20	CASSNDCKLSF	TGTGCCTCCTCTAACGACTGCAAGCTCAGCTTT	:::::::::0:-7:6:::::9:-2:33:::
72	TGTGCCTCTCCGAGTTCAGATGGCCAGAAGCTGCTCTTT	TRAV24		TRAJ16	TRAV24	TRAJ16	CASPSSDGQKLLF	TGTGCCTCTCCGAGTTCAGATGGCCAGAAGCTGCTCTTT	:::::::::0:-3:7:::::14:-4:39:::
73	TGTGCCTGGGGGGCTTCCAAGATAATCTTT	TRAV12-2	TRDD3	TRAJ3	TRAV12	TRAJ3	CAWGASKIIF	TGTGCCTGGGGGGCTTCCAAGATAATCTTT	:::::::::0:-7:6:6:-2:-5:12:12:-13:30:::
74	TGTGCCTGTGACACGTTAAACAGTGGGGATGCGACTGACGCCGATAAACTCATCTTT	TRDV2	TRDD3	TRDJ1	TRDV2	TRDJ1	CACDTLNSGDATDADKLIF	TGTGCCTGTGACACGTTAAACAGTGGGGATGCGACTGACGCCGATAAACTCATCTTT	:::::::::0:-1:14:24:-4:-3:30:40:-3:57:::
75	TGTGCCTGTGACACTCTCTCGTCGTTACTGGGGGATAAAGGTACCGATAAACTCATCTTT	TRDV2	TRDD3	TRDJ1	TRDV2	TRDJ1	CACDTLSSLLGDKGTDKLIF	TGTGCCTGTGACACTCTCTCGTCGTTACTGGGGGATAAAGGTACCGATAAACTCATCTTT	:::::::::0:-1:14:25:1:-2:37:42:-2:60:::
76	TGTGCCTGTGACGCGTTAAACAGTGGGGATGCGACTGACGCCGATAAACTCATCTTT	TRDV2	TRDD3	TRDJ1	TRDV2	TRDJ1	CACDALNSGDATDADKLIF	TGTGCCTGTGACGCGTTAAACAGTGGGGATGCGACTGACGCCGATAAACTCATCTTT	:::::::::0:-3:12:24:-4:-3:30:40:-3:57:::
77	TGTGCCTGTGACGCGTTAAACAGTGGGGATGCGACTGACGCCGATAAACTCCTCTTT	TRDV2	TRDD3	TRDJ1	TRDV2	TRDJ1	CACDALNSGDATDADKLLF	TGTGCCTGTGACGCGTTAAACAGTGGGGATGCGACTGACGCCGATAAACTCCTCTTT	:::::::::0:-3:12:24:-4:-3:30:40:-3:57:::
78	TGTGCCTGTGACTCGGTACTGGGGGAAGGGTACACCGATAAACTCATCTTT	TRDV2	TRDD3	TRDJ1	TRDV2	TRDJ1	CACDSVLGEGYTDKLIF	TGTGCCTGTGACTCGGTACTGGGGGAAGGGTACACCGATAAACTCATCTTT	:::::::::0:-3:12:15:2:-4:26:29:2:51:::
79	TGTGCCTTCGAGGGGGGAAAGCTTATCTTC	TRAV12-2		TRAJ23	TRAV12	TRAJ23	CAFEGGKLIF	TGTGCCTTCGAGGGGGGAAAGCTTATCTTC	:::::::::0:-7:6:::::10:-12:30:::
80	TGTGCCTTGAGCGGCGACAAGCTCATCTTT	TRAV12-3		TRAJ34	TRAV12	TRAJ34	CALSGDKLIF	TGTGCCTTGAGCGGCGACAAGCTCATCTTT	:::::::::0:0:13:::::14:-11:30:::
81	TGTGCCTTTGAGGGAGGAAAGCTTATCTTC	TRAV12-2		TRAJ23	TRAV12	TRAJ23	CAFEGGKLIF	TGTGCCTTTGAGGGAGGAAAGCTTATCTTC	:::::::::0:-7:6:::::10:-12:30:::
82	TGTGCCTTTGAGGGGGGAAAGCTTATCTTC	TRAV12-2		TRAJ23	TRAV12	TRAJ23	CAFEGGKLIF	TGTGCCTTTGAGGGGGGAAAGCTTATCTTC	:::::::::0:-7:6:::::10:-12:30:::
83	TGTGCGTCGTCTGGGGGTTACCAGAAAGTTACCTTT	TRAV20		TRAJ13	TRAV20	TRAJ13	CASSGGYQKVTF	TGTGCGTCGTCTGGGGGTTACCAGAAAGTTACCTTT	:::::::::0:-8:5:::::9:-5:36:::
84	TGTGCTCTAAGTGGCGGTCGGGCTGGCAACAACCGTAAGCTGATTTGG	TRAV16		TRAJ38	TRAV16	TRAJ38	CALSGGRAGNNRKLIW	TGTGCTCTAAGTGGCGGTCGGGCTGGCAACAACCGTAAGCTGATTTGG	:::::::::0:1:15:::::21:-4:48:::
85	TGTGCTCTACTAGCAAATTCCGGGTATGCACTCAACCTC	TRAV6		TRAJ41	TRAV6	TRAJ41	CALLANSGYALNL	TGTGCTCTACTAGCAAATTCCGGGTATGCACTCAACCTC	:::::::::0:-4:9:::::13:-5:39:::
86	TGTGCTCTACTAGCAAATTCCGGGTATGCACTCAACTTC	TRAV6		TRAJ41	TRAV6	TRAJ41	CALLANSGYALNF	TGTGCTCTACTAGCAAATTCCGGGTATGCACTCAACTTC	:::::::::0:-4:9:::::13:-5:39:::
87	TGTGCTCTAGCCCTGAACACAGGCTTTCAGAAACTTGTATTT	TRAV6		TRAJ8	TRAV6	TRAJ8	CALALNTGFQKLVF	TGTGCTCTAGCCCTGAACACAGGCTTTCAGAAACTTGTATTT	:::::::::0:-3:10:::::13:0:42:::
88	TGTGCTCTCGCGAATTCTGGGGGTTACCAGAAAGTTACCTTT	TRAV9-2		TRAJ13	TRAV9	TRAJ13	CALANSGGYQKVTF	TGTGCTCTCGCGAATTCTGGGGGTTACCAGAAAGTTACCTTT	:::::::::0:-6:8:::::11:-1:42:::
89	TGTGCTCTGAGCACCGTTTCAGGAAACACACCTCTTGTCTTT	TRAV9-2		TRAJ29	TRAV9	TRAJ29	CALSTVSGNTPLVF	TGTGCTCTGAGCACCGTTTCAGGAAACACACCTCTTGTCTTT	:::::::::0:-3:11:::::17:-4:42:::
90	TGTGCTCTGAGCGATGCGGGGGCGAGAGGAGGTGCTGACGGACTCACCTTT	TRAV9-2	TRDD3	TRAJ45	TRAV9	TRAJ45	CALSDAGARGGADGLTF	TGTGCTCTGAGCGATGCGGGGGCGAGAGGAGGTGCTGACGGACTCACCTTT	:::::::::0:1:15:17:-3:-5:22:25:-9:51:::
91	TGTGCTCTGAGTGTAAAAGGAGGAAGCCAAGGAAATCTCATCTTT	TRAV9-2		TRAJ42	TRAV9	TRAJ42	CALSVKGGSQGNLIF	TGTGCTCTGAGTGTAAAAGGAGGAAGCCAAGGAAATCTCATCTTT	:::::::::0:-1:13:::::18:-8:45:::
92	TGTGCTCTTGGGGATCTCTACTGGCATCCTAAAGACTGGGGGATACTGGGCGGCGATAAACTCATCTTT	TRDV1	TRDD3	TRDJ1	TRDV1	TRDJ1	CALGDLYWHPKDWGILGGDKLIF	TGTGCTCTTGGGGATCTCTACTGGCATCCTAAAGACTGGGGGATACTGGGCGGCGATAAACTCATCTTT	:::::::::0:-3:14:34:0:-1:46:53:-4:69:::
93	TGTGCTGGCGCAACTGACAGCTGGGGGAAATTGCAGTTT	TRAV2		TRAJ24	TRAV2	TRAJ24	CAGATDSWGKLQF	TGTGCTGGCGCAACTGACAGCTGGGGGAAATTGCAGTTT	:::::::::0:-7:7:::::10:-3:39:::
94	TGTGCTGTGAAAGATGGGGGAGGTGCTACAAACAAGCTCATCTTT	TRAV1-2	TRDD3	TRAJ32	TRAV1	TRAJ32	CAVKDGGGATNKLIF	TGTGCTGTGAAAGATGGGGGAGGTGCTACAAACAAGCTCATCTTT	:::::::::0:1:15:15:-3:-4:21:21:-11:45:::
95	TGTGCTGTGAAAGGATACAGCACCCTCACCTTT	TRAV21		TRAJ11	TRAV21	TRAJ11	CAVKGYSTLTF	TGTGCTGTGAAAGGATACAGCACCCTCACCTTT	:::::::::0:-2:10:::::11:-7:33:::
96	TGTGCTGTGACCAAGGATTCTGCAAGGCAACTGACCTTT	TRAV3		TRAJ22	TRAV3	TRAJ22	CAVTKDSARQLTF	TGTGCTGTGACCAAGGATTCTGCAAGGCAACTGACCTTT	:::::::::0:-6:10:::::17:-10:39:::
97	TGTGCTGTGAGAGACACGGATAACTATGGTCAGAATTTTGTCTTT	TRAV3		TRAJ26	TRAV3	TRAJ26	CAVRDTDNYGQNFVF	TGTGCTGTGAGAGACACGGATAACTATGGTCAGAATTTTGTCTTT	:::::::::0:0:16:::::17:-1:45:::
98	TGTGCTGTGAGAGACCGGGGAGCCAGACTCATGTTT	TRAV3	TRDD3	TRAJ31	TRAV3	TRAJ31	CAVRDRGARLMF	TGTGCTGTGAGAGACCGGGGAGCCAGACTCATGTTT	:::::::::0:-1:15:16:-4:-4:21:21:-11:36:::
99	TGTGCTGTGAGAGACGGGGATAGCAACTATCAGTTAATCTGG	TRAV3		TRAJ33	TRAV3	TRAJ33	CAVRDGDSNYQLIW	TGTGCTGTGAGAGACGGGGATAGCAACTATCAGTTAATCTGG	:::::::::0:-1:15:::::17:-1:42:::
100	TGTGCTGTGAGAGCTGGCCGGAATAACAATGCCAGACTCATGTTT	TRAV3		TRAJ31	TRAV3	TRAJ31	CAVRAGRNNNARLMF	TGTGCTGTGAGAGCTGGCCGGAATAACAATGCCAGACTCATGTTT	:::::::::0:-3:13:::::17:2:45:::
101	TGTGCTGTGAGAGCTGGCCGGAATAACAATGCCAGATTCATGTTT	TRAV3		TRAJ31	TRAV3	TRAJ31	CAVRAGRNNNARFMF	TGTGCTGTGAGAGCTGGCCGGAATAACAATGCCAGATTCATGTTT	:::::::::0:-3:13:::::17:2:45:::
102	TGTGCTGTGAGAGGACCTTCTGGGGGTTACCAGAAAGTTACCTTT	TRAV3		TRAJ13	TRAV3	TRAJ13	CAVRGPSGGYQKVTF	TGTGCTGTGAGAGGACCTTCTGGGGGTTACCAGAAAGTTACCTTT	:::::::::0:-3:13:::::17:-4:45:::
103	TGTGCTGTGAGGGGTGGGGGAGGTAGCAACTATAAACTGACATTT	TRAV22		TRAJ53	TRAV22	TRAJ53	CAVRGGGGSNYKLTF	TGTGCTGTGAGGGGTGGGGGAGGTAGCAACTATAAACTGACATTT	:::::::::0:-4:9:::::18:-8:45:::
104	TGTGCTGTGAGTGATAGCTTGAACAGAGATGACAAGATCATCTTT	TRAV8-6		TRAJ30	TRAV8	TRAJ30	CAVSDSLNRDDKIIF	TGTGCTGTGAGTGATAGCTTGAACAGAGATGACAAGATCATCTTT	:::::::::0:1:15:::::19:0:45:::
105	TGTGCTGTGAGTGATCTAGGCAATGACATGCGCTTT	TRAV8-4		TRAJ43	TRAV8	TRAJ43	CAVSDLGNDMRF	TGTGCTGTGAGTGATCTAGGCAATGACATGCGCTTT	:::::::::0:2:16:::::20:-7:36:::
106	TGTGCTGTGAGTGTTCTATCAGGAGGAAGCTACATACCTACATTT	TRAV8-4		TRAJ6	TRAV8	TRAJ6	CAVSVLSGGSYIPTF	TGTGCTGTGAGTGTTCTATCAGGAGGAAGCTACATACCTACATTT	:::::::::0:-1:13:::::17:-3:45:::
107	TGTGCTGTGGATTCGAGGTATGGAGGAAGCCAAGGAAATCTCATCTTT	TRAV21	TRDD1	TRAJ42	TRAV21	TRAJ42	CAVDSRYGGSQGNLIF	TGTGCTGTGGATTCGAGGTATGGAGGAAGCCAAGGAAATCTCATCTTT	:::::::::0:-3:9:11:3:-6:16:18:-5:48:::
108	TGTGCTGTGGGGGACTTCAACAAATTTTACTTT	TRAV2		TRAJ21	TRAV2	TRAJ21	CAVGDFNKFYF	TGTGCTGTGGGGGACTTCAACAAATTTTACTTT	:::::::::0:0:14:::::13:-4:33:::
109	TGTGCTGTGGGTGACGATTATGGAGGAAGCCAAGGAAATCTCATCTTT	TRAV8-3		TRAJ42	TRAV8	TRAJ42	CAVGDDYGGSQGNLIF	TGTGCTGTGGGTGACGATTATGGAGGAAGCCAAGGAAATCTCATCTTT	:::::::::0:-1:13:::::16:-3:48:::
110	TGTGCTGTGGGTGCGGCTTCTGGTGGCTACAATAAGCTGATTTTT	TRAV8-3		TRAJ4	TRAV8	TRAJ4	CAVGAASGGYNKLIF	TGTGCTGTGGGTGCGGCTTCTGGTGGCTACAATAAGCTGATTTTT	:::::::::0:1:15:::::17:-4:45:::
111	TGTGCTTATAGAAGGCTATACAACTTCAACAAATTTTACTTT	TRAV38-2DV8	TRDD2	TRAJ21	TRAV38	TRAJ21	CAYRRLYNFNKFYF	TGTGCTTATAGAAGGCTATACAACTTCAACAAATTTTACTTT	:::::::::0:-5:11:11:4:-8:16:16:2:42:::
112	TGTGCTTATAGGAGCGAACGAGGAAGCCAAGGAAATCTCATCTTT	TRAV38-2DV8		TRAJ42	TRAV38	TRAJ42	CAYRSERGSQGNLIF	TGTGCTTATAGGAGCGAACGAGGAAGCCAAGGAAATCTCATCTTT	:::::::::0:0:16:::::19:-9:45:::
113	TGTGCTTATTCGCGGCGTCGGGGGAAGCTGACATTT	TRAV38-2DV8	TRDD3	TRAJ52	TRAV38	TRAJ52	CAYSRRRGKLTF	TGTGCTTATTCGCGGCGTCGGGGGAAGCTGACATTT	:::::::::0:-7:9:19:-3:-5:24:24:-26:36:::
114	TGTGCTTTCGGGGCGGGCAGAGATGACAAGATCATCTTT	TRAV38-1		TRAJ30	TRAV38	TRAJ30	CAFGAGRDDKIIF	TGTGCTTTCGGGGCGGGCAGAGATGACAAGATCATCTTT	:::::::::0:-8:9:::::17:-4:39:::
115	TGTGCTTTCTCAAAAGCTGCAGGCAACAAGCTAACTTTT	TRAV38-2DV8		TRAJ17	TRAV38	TRAJ17	CAFSKAAGNKLTF	TGTGCTTTCTCAAAAGCTGCAGGCAACAAGCTAACTTTT	:::::::::0:-9:7:::::12:-5:39:::
116	TGTGGCGGGGGGAACTATGGTCAGAATTTTGTCTTT	TRAV12-2	TRDD3	TRAJ26	TRAV12	TRAJ26	CGGGNYGQNFVF	TGTGGCGGGGGGAACTATGGTCAGAATTTTGTCTTT	:::::::::0:-9:4:6:-3:-5:11:12:-5:36:::
117	TGTGTCTCCTCTAACGACTACAAGCTCAGCTTT	TRAV12-2		TRAJ20	TRAV12	TRAJ20	CVSSNDYKLSF	TGTGTCTCCTCTAACGACTACAAGCTCAGCTTT	:::::::::0:-9:4:::::9:-2:33:::
118	TGTGTGGTGAACAGGGACAGCTATAAATTGATCTTC	TRAV12-1		TRAJ12	TRAV12	TRAJ12	CVVNRDSYKLIF	TGTGTGGTGAACAGGGACAGCTATAAATTGATCTTC	:::::::::0:0:13:::::17:-10:36:::
119	TGTGTGGTGAACCAGGCAGGAACTGCTCTGATCTTT	TRAV12-1		TRAJ15	TRAV12	TRAJ15	CVVNQAGTALIF	TGTGTGGTGAACCAGGCAGGAACTGCTCTGATCTTT	:::::::::0:-1:12:::::9:-2:36:::
120	TGTGTGGTGAACGACTACAAGCTCAGCTTT	TRAV12-1		TRAJ20	TRAV12	TRAJ20	CVVNDYKLSF	TGTGTGGTGAACGACTACAAGCTCAGCTTT	:::::::::0:-1:12:::::9:-5:30:::
121	TGTGTGGTGACGGGGGGAAAGCTTATCTTC	TRAV12-1		TRAJ23	TRAV12	TRAJ23	CVVTGGKLIF	TGTGTGGTGACGGGGGGAAAGCTTATCTTC	:::::::::0:-3:10:::::11:-13:30:::
122	TGTGTGGTGAGCTACGACAAGCTCATCTTT	TRAV12-1		TRAJ34	TRAV12	TRAJ34	CVVSYDKLIF	TGTGTGGTGAGCTACGACAAGCTCATCTTT	:::::::::0:-3:10:::::14:-11:30:::
123	TGTGTGGTGGGAGATGACAAGATCATCTTT	TRAV12-1		TRAJ30	TRAV12	TRAJ30	CVVGDDKIIF	TGTGTGGTGGGAGATGACAAGATCATCTTT	:::::::::0:-4:9:::::10:-6:30:::
124	TGTGTGGTGGGTGATGACAAGATCATCTTT	TRAV12-1		TRAJ30	TRAV12	TRAJ30	CVVGDDKIIF	TGTGTGGTGGGTGATGACAAGATCATCTTT	:::::::::0:-4:9:::::12:-8:30:::
125	TGTGTGGTTACGGGGGGAAAGCTTATCTTC	TRAV12-1		TRAJ23	TRAV12	TRAJ23	CVVTGGKLIF	TGTGTGGTTACGGGGGGAAAGCTTATCTTC	:::::::::0:-5:8:::::11:-13:30:::
126	TGTGTGGTTTCCTCAGGAACCTACAAATACATCTTT	TRAV12-1		TRAJ40	TRAV12	TRAJ40	CVVSSGTYKYIF	TGTGTGGTTTCCTCAGGAACCTACAAATACATCTTT	:::::::::0:-5:8:::::10:-4:36:::
127	TGTGTTGTGAGCCTCATGAACACAGGCTTTCAGAAACTTGTATTT	TRAV8-2		TRAJ8	TRAV8	TRAJ8	CVVSLMNTGFQKLVF	TGTGTTGTGAGCCTCATGAACACAGGCTTTCAGAAACTTGTATTT	:::::::::0:-3:11:::::13:3:45:::
128	TGTGTTGTGAGTGAGGAAAACAACTTCAACAAATTTTACTTT	TRAV8-2		TRAJ21	TRAV8	TRAJ21	CVVSEENNFNKFYF	TGTGTTGTGAGTGAGGAAAACAACTTCAACAAATTTTACTTT	:::::::::0:0:14:::::19:-1:42:::
129	TGTGTTGTGAGTGATCTAGGCAATGACATGCGCTTT	TRAV8-4		TRAJ43	TRAV8	TRAJ43	CVVSDLGNDMRF	TGTGTTGTGAGTGATCTAGGCAATGACATGCGCTTT	:::::::::0:2:16:::::20:-7:36:::
130	TGTTCGAATTCTGGGGGTTACCAGAAAGTTACCTTT	TRAV5		TRAJ13	TRAV5	TRAJ13	CSNSGGYQKVTF	TGTTCGAATTCTGGGGGTTACCAGAAAGTTACCTTT	:::::::::0:-10:3:::::5:-1:36:::

## Sheet: NS4B+ TCRbeta donor P30
	CDR3.nucleotide.sequence	bestVGene	bestDGene	bestJGene	bestVFamily	bestJFamily	CDR3.amino.acid.sequence	nSeqCDR3	refPoints
1	CGTGCCAGCAGCCACGGACTGGGTCACACCGGGGAGCTGTTTTTT	TRBV7-9	TRBD2	TRBJ2-2	TRBV7	TRBJ2	RASSHGLGHTGELFF	CGTGCCAGCAGCCACGGACTGGGTCACACCGGGGAGCTGTTTTTT	:::::::::0:-5:12:15:-1:-10:20:25:-3:45:::
2	TGCAGCGTTGAACTAGGGGTTTCCTACGAGCAGTACTTC	TRBV29-1	TRBD1	TRBJ2-7	TRBV29	TRBJ2	CSVELGVSYEQYF	TGCAGCGTTGAACTAGGGGTTTCCTACGAGCAGTACTTC	:::::::::0:-2:12:14:-5:-2:19:21:-1:39:::
3	TGCAGCGTTGCGCTAGCGGGAGGCTCCAATGAGCAGTTCTTC	TRBV29-1	TRBD2	TRBJ2-1	TRBV29	TRBJ2	CSVALAGGSNEQFF	TGCAGCGTTGCGCTAGCGGGAGGCTCCAATGAGCAGTTCTTC	:::::::::0:-4:10:12:-4:-1:23:26:-6:42:::
4	TGCAGCGTTGGGGACACCTTCTACGAGCAGTACTTC	TRBV29-1	TRBD1	TRBJ2-7	TRBV29	TRBJ2	CSVGDTFYEQYF	TGCAGCGTTGGGGACACCTTCTACGAGCAGTACTTC	:::::::::0:-4:10:10:0:-6:16:20:-3:36:::
5	TGCAGTGACCCTATGGACAGGGGAGCAGATACGCAGTATTTT	TRBV20-1	TRBD1	TRBJ2-3	TRBV20	TRBJ2	CSDPMDRGADTQYF	TGCAGTGACCCTATGGACAGGGGAGCAGATACGCAGTATTTT	:::::::::0:-7:7:14:-1:-2:23:25:-4:42:::
6	TGCAGTGCCCCTATGGACAGGGGAGCAGATACGCAGTATTTT	TRBV20-1	TRBD1	TRBJ2-3	TRBV20	TRBJ2	CSAPMDRGADTQYF	TGCAGTGCCCCTATGGACAGGGGAGCAGATACGCAGTATTTT	:::::::::0:-6:8:14:-1:-2:23:25:-4:42:::
7	TGCAGTGCCCCTGTCGGGGGGGACATCACCTACGAGCAGTACTTC	TRBV20-1	TRBD1	TRBJ2-7	TRBV20	TRBJ2	CSAPVGGDITYEQYF	TGCAGTGCCCCTGTCGGGGGGGACATCACCTACGAGCAGTACTTC	:::::::::0:-6:8:8:9:-14:15:28:-2:45:::
8	TGCAGTGCCTTCCGTGACTCTTATGAGCAGTTCTTC	TRBV20-1		TRBJ2-1	TRBV20	TRBJ2	CSAFRDSYEQFF	TGCAGTGCCTTCCGTGACTCTTATGAGCAGTTCTTC	:::::::::0:-6:8:::::22:-8:36:::
9	TGCAGTGCTAACCCCCCCGGGCGGCCTTCCCCCTACGAGCAGTACTTC	TRBV20-1	TRBD1	TRBJ2-7	TRBV20	TRBJ2	CSANPPGRPSPYEQYF	TGCAGTGCTAACCCCCCCGGGCGGCCTTCCCCCTACGAGCAGTACTTC	:::::::::0:-4:10:15:3:-9:21:31:-2:48:::
10	TGCAGTGCTAGAGAGGAAGGGGGCTATGGCTACACCTTC	TRBV20-1	TRBD1	TRBJ1-2	TRBV20	TRBJ1	CSAREEGGYGYTF	TGCAGTGCTAGAGAGGAAGGGGGCTATGGCTACACCTTC	:::::::::0:0:14:17:-5:-1:23:23:-4:39:::
11	TGCAGTGCTAGAGAGGCAAGCGGCCGAGGCACCGGTGAGCTGTTTTTT	TRBV20-1	TRBD2	TRBJ2-2	TRBV20	TRBJ2	CSAREASGRGTGELFF	TGCAGTGCTAGAGAGGCAAGCGGCCGAGGCACCGGTGAGCTGTTTTTT	:::::::::0:0:14:18:-6:-5:23:29:-4:48:::
12	TGCAGTGCTAGAGATCCCGGGACCGGGGAGCTGTTTTTT	TRBV20-1	TRBD1	TRBJ2-2	TRBV20	TRBJ2	CSARDPGTGELFF	TGCAGTGCTAGAGATCCCGGGACCGGGGAGCTGTTTTTT	:::::::::0:2:16:16:2:-9:21:21:-5:39:::
13	TGCAGTGCTAGAGATCTCGGGAGGTCCGGGGAGCTGTTTTTT	TRBV20-1	TRBD2	TRBJ2-2	TRBV20	TRBJ2	CSARDLGRSGELFF	TGCAGTGCTAGAGATCTCGGGAGGTCCGGGGAGCTGTTTTTT	:::::::::0:4:18:18:-9:-1:24:25:-6:42:::
14	TGCAGTGCTAGAGTAGGGGAGCATGGCTACACCTTC	TRBV20-1	TRBD1	TRBJ1-2	TRBV20	TRBJ1	CSARVGEHGYTF	TGCAGTGCTAGAGTAGGGGAGCATGGCTACACCTTC	:::::::::0:-1:13:14:-5:-2:19:22:-6:36:::
15	TGCAGTGCTAGCCTGACTAGCGGGAGGGCCGACGAGCAGTACTTC	TRBV20-1	TRBD2	TRBJ2-7	TRBV20	TRBJ2	CSASLTSGRADEQYF	TGCAGTGCTAGCCTGACTAGCGGGAGGGCCGACGAGCAGTACTTC	:::::::::0:-3:11:14:-2:2:30:31:-5:45:::
16	TGCAGTGCTAGCCTGACTAGCGGGAGGGTCGACGAGCAGTACTTC	TRBV20-1	TRBD2	TRBJ2-7	TRBV20	TRBJ2	CSASLTSGRVDEQYF	TGCAGTGCTAGCCTGACTAGCGGGAGGGTCGACGAGCAGTACTTC	:::::::::0:-3:11:14:-2:0:28:31:-5:45:::
17	TGCAGTGCTAGGGAGGAAGCGGGCGCCTCGGGTGGGCAGTTCTTC	TRBV20-1	TRBD1	TRBJ2-1	TRBV20	TRBJ2	CSAREEAGASGGQFF	TGCAGTGCTAGGGAGGAAGCGGGCGCCTCGGGTGGGCAGTTCTTC	:::::::::0:-3:11:20:-8:3:27:35:-12:45:::
18	TGCAGTGCTAGGGAGGTAGCGGGCGCCTCGGGTGGGCAGTTCTTC	TRBV20-1	TRBD1	TRBJ2-1	TRBV20	TRBJ2	CSAREVAGASGGQFF	TGCAGTGCTAGGGAGGTAGCGGGCGCCTCGGGTGGGCAGTTCTTC	:::::::::0:-3:11:20:-8:3:27:35:-12:45:::
19	TGCAGTGCTCCGCTAGCGGGAGGGGGAAATGAGCAGTTCATC	TRBV20-1	TRBD2	TRBJ2-1	TRBV20	TRBJ2	CSAPLAGGGNEQFI	TGCAGTGCTCCGCTAGCGGGAGGGGGAAATGAGCAGTTCATC	:::::::::0:-5:9:12:-4:0:24:27:-7:42:::
20	TGCAGTGCTCCGCTAGCGGGAGGGGGAAATGAGCAGTTCTTC	TRBV20-1	TRBD2	TRBJ2-1	TRBV20	TRBJ2	CSAPLAGGGNEQFF	TGCAGTGCTCCGCTAGCGGGAGGGGGAAATGAGCAGTTCTTC	:::::::::0:-5:9:12:-4:0:24:27:-7:42:::
21	TGCAGTGCTCCGCTAGCGGGAGGGGGGAATGAGCAGTTCTTC	TRBV20-1	TRBD2	TRBJ2-1	TRBV20	TRBJ2	CSAPLAGGGNEQFF	TGCAGTGCTCCGCTAGCGGGAGGGGGGAATGAGCAGTTCTTC	:::::::::0:-5:9:12:-4:0:24:27:-7:42:::
22	TGCAGTGCTCCTCAGGGTTTCGGTCAGCCCCAGCATTTT	TRBV20-1	TRBD1	TRBJ1-5	TRBV20	TRBJ1	CSAPQGFGQPQHF	TGCAGTGCTCCTCAGGGTTTCGGTCAGCCCCAGCATTTT	:::::::::0:-5:9:12:-4:-3:17:23:-6:39:::
23	TGCAGTGCTCTTCCCGGGACTAGGGGCTACGAGCAGTACTTC	TRBV20-1	TRBD2	TRBJ2-7	TRBV20	TRBJ2	CSALPGTRGYEQYF	TGCAGTGCTCTTCCCGGGACTAGGGGCTACGAGCAGTACTTC	:::::::::0:-5:9:11:4:-8:23:26:-3:42:::
24	TGCAGTGCTGGCCCCTTTGGTAGTAGCGGGAGAGGTGGGGCCAACGTCCTGACTTTC	TRBV20-1	TRBD2	TRBJ2-6	TRBV20	TRBJ2	CSAGPFGSSGRGGANVLTF	TGCAGTGCTGGCCCCTTTGGTAGTAGCGGGAGAGGTGGGGCCAACGTCCTGACTTTC	:::::::::0:-5:9:23:-5:-2:32:35:-3:57:::
25	TGCAGTGTCATTCTAGAGCGGTTTCCCACAGATACGCAGTATTTT	TRBV20-1	TRBD2	TRBJ2-3	TRBV20	TRBJ2	CSVILERFPTDTQYF	TGCAGTGTCATTCTAGAGCGGTTTCCCACAGATACGCAGTATTTT	:::::::::0:-7:7:16:-6:-5:21:26:-2:45:::
26	TGCGCCAGCAGCACACAGGGAGGGACTAGCTCCTACAATGAGCAGTTCTTC	TRBV5-4	TRBD2	TRBJ2-1	TRBV5	TRBJ2	CASSTQGGTSSYNEQFF	TGCGCCAGCAGCACACAGGGAGGGACTAGCTCCTACAATGAGCAGTTCTTC	:::::::::0:-4:12:17:-9:0:24:27:2:51:::
27	TGCGCCAGCAGCCAAACCGGGACGAACTCCTACGAGCAGTACTTC	TRBV4-1	TRBD1	TRBJ2-7	TRBV4	TRBJ2	CASSQTGTNSYEQYF	TGCGCCAGCAGCCAAACCGGGACGAACTCCTACGAGCAGTACTTC	:::::::::0:-2:15:16:2:-7:23:26:0:45:::
28	TGCGCCAGCAGCCAACAGGGTTACGAGCAGTACTTC	TRBV5-1	TRBD1	TRBJ2-7	TRBV5	TRBJ2	CASSQQGYEQYF	TGCGCCAGCAGCCAACAGGGTTACGAGCAGTACTTC	:::::::::0:-4:12:14:-3:-3:20:21:-4:36:::
29	TGCGCCAGCAGCCAAGAGCACCTAGCGGGAATGTACGAGCAGTACTTC	TRBV4-1	TRBD2	TRBJ2-7	TRBV4	TRBJ2	CASSQEHLAGMYEQYF	TGCGCCAGCAGCCAAGAGCACCTAGCGGGAATGTACGAGCAGTACTTC	:::::::::0:0:17:21:-4:-3:30:33:-4:48:::
30	TGCGCCAGCAGCCAAGATCATGGGGGAGTAGGCTATGGCTACACCTTC	TRBV4-3	TRBD2	TRBJ1-2	TRBV4	TRBJ1	CASSQDHGGVGYGYTF	TGCGCCAGCAGCCAAGATCATGGGGGAGTAGGCTATGGCTACACCTTC	:::::::::0:6:23:23:-9:-2:28:32:-4:48:::
31	TGCGCCAGCAGCCAAGATGTATCTGGGGCCAACGTCCTGACTTTC	TRBV4-3		TRBJ2-6	TRBV4	TRBJ2	CASSQDVSGANVLTF	TGCGCCAGCAGCCAAGATGTATCTGGGGCCAACGTCCTGACTTTC	:::::::::0:1:18:::::21:-1:45:::
32	TGCGCCAGCAGCCAGACGACAGGGGGCTACGAGCAGTACTTC	TRBV4-3	TRBD1	TRBJ2-7	TRBV4	TRBJ2	CASSQTTGGYEQYF	TGCGCCAGCAGCCAGACGACAGGGGGCTACGAGCAGTACTTC	:::::::::0:-3:14:17:-2:-1:26:26:-3:42:::
33	TGCGCCAGCAGCCCCGGACAGGGGACTTACGAGCAGTACTTC	TRBV4-3	TRBD1	TRBJ2-7	TRBV4	TRBJ2	CASSPGQGTYEQYF	TGCGCCAGCAGCCCCGGACAGGGGACTTACGAGCAGTACTTC	:::::::::0:-4:13:15:-1:-2:24:27:-4:42:::
34	TGCGCCAGCAGCTTGGAGGCAGCCAAAAACATTCAGTACTTC	TRBV5-1		TRBJ2-4	TRBV5	TRBJ2	CASSLEAAKNIQYF	TGCGCCAGCAGCTTGGAGGCAGCCAAAAACATTCAGTACTTC	:::::::::0:0:16:::::20:0:42:::
35	TGCGCCAGCAGCTTGGATCTAGCCAACGAGCAGTACTTC	TRBV5-1	TRBD2	TRBJ2-7	TRBV5	TRBJ2	CASSLDLANEQYF	TGCGCCAGCAGCTTGGATCTAGCCAACGAGCAGTACTTC	:::::::::0:0:16:18:-4:-7:23:25:-5:39:::
36	TGCGCCAGCAGCTTGGATCTAGCCTACGAGCAGTACTTC	TRBV5-1		TRBJ2-7	TRBV5	TRBJ2	CASSLDLAYEQYF	TGCGCCAGCAGCTTGGATCTAGCCTACGAGCAGTACTTC	:::::::::0:0:16:::::22:-2:39:::
37	TGCGCCAGCAGCTTGGCGGCTAGCGGGAGCTACGAGCAGTACTTC	TRBV5-1	TRBD2	TRBJ2-7	TRBV5	TRBJ2	CASSLAASGSYEQYF	TGCGCCAGCAGCTTGGCGGCTAGCGGGAGCTACGAGCAGTACTTC	:::::::::0:1:17:19:-4:-2:29:29:-3:45:::
38	TGCGCCAGCAGTGACCGGGACAGGGCGGCGCCCCAGCCCCAGCATTTT	TRBV10-1	TRBD1	TRBJ1-5	TRBV10	TRBJ1	CASSDRDRAAPQPQHF	TGCGCCAGCAGTGACCGGGACAGGGCGGCGCCCCAGCCCCAGCATTTT	:::::::::0:-3:14:14:2:4:33:33:-7:48:::
39	TGCGCCAGCAGTGAGACAGGGGAGGGAGAAACGCAGTATTTT	TRBV10-1	TRBD1	TRBJ2-3	TRBV10	TRBJ2	CASSETGEGETQYF	TGCGCCAGCAGTGAGACAGGGGAGGGAGAAACGCAGTATTTT	:::::::::0:-2:15:15:-3:-2:22:26:-5:42:::
40	TGCGCCAGCAGTGAGACAGGGGAGGGAGATACGCAGTATTTT	TRBV10-1	TRBD1	TRBJ2-3	TRBV10	TRBJ2	CASSETGEGDTQYF	TGCGCCAGCAGTGAGACAGGGGAGGGAGATACGCAGTATTTT	:::::::::0:-2:15:15:-3:-2:22:26:-5:42:::
41	TGCGCCAGCTCTTACGGGCAGGGTAACGGCTACACCTTC	TRBV4-3	TRBD1	TRBJ1-2	TRBV4	TRBJ1	CASSYGQGNGYTF	TGCGCCAGCTCTTACGGGCAGGGTAACGGCTACACCTTC	:::::::::0:-8:9:18:-4:-3:23:27:-8:39:::
42	TGTCCCAGCAGTCCGGGGCCCAACAATGAGCAGTTCTTC	TRBV6-5	TRBD2	TRBJ2-1	TRBV6	TRBJ2	CPSSPGPNNEQFF	TGTCCCAGCAGTCCGGGGCCCAACAATGAGCAGTTCTTC	:::::::::0:-5:12:15:-13:3:21:22:-5:39:::
43	TGTGCCAACGGGGACAGGGCCCACGAGCAGTACTTC	TRBV2	TRBD1	TRBJ2-7	TRBV2	TRBJ2	CANGDRAHEQYF	TGTGCCAACGGGGACAGGGCCCACGAGCAGTACTTC	:::::::::0:-10:7:10:0:-3:19:22:-5:36:::
44	TGTGCCACCAACAGGGGAATCTACGAGCAGTACTTC	TRBV27	TRBD1	TRBJ2-7	TRBV27	TRBJ2	CATNRGIYEQYF	TGTGCCACCAACAGGGGAATCTACGAGCAGTACTTC	:::::::::0:-10:7:10:-3:-2:17:20:-3:36:::
45	TGTGCCACCAGCAGACTTGATGGTCAGTCCCAGCATTTT	TRBV15		TRBJ1-5	TRBV15	TRBJ1	CATSRLDGQSQHF	TGTGCCACCAGCAGACTTGATGGTCAGTCCCAGCATTTT	:::::::::0:-2:15:::::23:-6:39:::
46	TGTGCCACCAGCAGAGCTCCCGGATACGAGCAGTACTTC	TRBV15	TRBD1	TRBJ2-7	TRBV15	TRBJ2	CATSRAPGYEQYF	TGTGCCACCAGCAGAGCTCCCGGATACGAGCAGTACTTC	:::::::::0:-1:16:17:4:-10:23:24:-4:39:::
47	TGTGCCACCAGCAGAGCTCCCGGATACGAGCTGTACTTC	TRBV15	TRBD1	TRBJ2-7	TRBV15	TRBJ2	CATSRAPGYELYF	TGTGCCACCAGCAGAGCTCCCGGATACGAGCTGTACTTC	:::::::::0:-1:16:17:4:-10:23:24:-4:39:::
48	TGTGCCACCAGCAGATCGGTTGGGAATCAGCCCCAGCATTTT	TRBV15		TRBJ1-5	TRBV15	TRBJ1	CATSRSVGNQPQHF	TGTGCCACCAGCAGATCGGTTGGGAATCAGCCCCAGCATTTT	:::::::::0:-2:15:::::24:-4:42:::
49	TGTGCCACCAGCGTAAGGCCGGGGGGCGAGCAGTACTTC	TRBV15	TRBD1	TRBJ2-7	TRBV15	TRBJ2	CATSVRPGGEQYF	TGTGCCACCAGCGTAAGGCCGGGGGGCGAGCAGTACTTC	:::::::::0:-5:12:18:2:-9:23:26:-6:39:::
50	TGTGCCACCAGTACGGGACTAGCGGTCTACGAGCAGTACTTC	TRBV15	TRBD2	TRBJ2-7	TRBV15	TRBJ2	CATSTGLAVYEQYF	TGTGCCACCAGTACGGGACTAGCGGTCTACGAGCAGTACTTC	:::::::::0:-6:11:13:1:-5:25:26:-3:42:::
51	TGTGCCACCAGTGATTCCCTTCCCCCTGGGGCCAACGTCCTGACTTTC	TRBV24-1		TRBJ2-6	TRBV24	TRBJ2	CATSDSLPPGANVLTF	TGTGCCACCAGTGATTCCCTTCCCCCTGGGGCCAACGTCCTGACTTTC	:::::::::0:-2:16:::::25:-2:48:::
52	TGTGCCACCGGGCAGGACAGGGCCTACGAGCAGTACTTC	TRBV15	TRBD1	TRBJ2-7	TRBV15	TRBJ2	CATGQDRAYEQYF	TGTGCCACCGGGCAGGACAGGGCCTACGAGCAGTACTTC	:::::::::0:-8:9:14:-1:-3:22:22:-2:39:::
53	TGTGCCACGGGGGTGAGAGGAAACAATGAGCAGTTCTTC	TRBV15	TRBD1	TRBJ2-1	TRBV15	TRBJ2	CATGVRGNNEQFF	TGTGCCACGGGGGTGAGAGGAAACAATGAGCAGTTCTTC	:::::::::0:-9:8:8:-6:-1:13:22:-5:39:::
54	TGTGCCACTAATGCGGGGGAAGGGTACGAGCAGTACTTC	TRBV15	TRBD1	TRBJ2-7	TRBV15	TRBJ2	CATNAGEGYEQYF	TGTGCCACTAATGCGGGGGAAGGGTACGAGCAGTACTTC	:::::::::0:-9:8:14:-6:-1:19:24:-4:39:::
55	TGTGCCAGCAACGCTGGAGGGGGCTACGAGCAGTACTTC	TRBV6-5	TRBD1	TRBJ2-7	TRBV6	TRBJ2	CASNAGGGYEQYF	TGTGCCAGCAACGCTGGAGGGGGCTACGAGCAGTACTTC	:::::::::0:-7:10:17:-5:-1:23:23:-3:39:::
56	TGTGCCAGCAACTGGAGGGCAACGCAGTGGAACACTGAAGCTTTCTTT	TRBV5-6	TRBD2	TRBJ1-1	TRBV5	TRBJ1	CASNWRATQWNTEAFF	TGTGCCAGCAACTGGAGGGCAACGCAGTGGAACACTGAAGCTTTCTTT	:::::::::0:-6:10:13:-10:1:20:29:-1:48:::
57	TGTGCCAGCACCCAGGGACTAGCGGGAGGTTTTTACGAGCAGTACTTC	TRBV3-1	TRBD2	TRBJ2-7	TRBV3	TRBJ2	CASTQGLAGGFYEQYF	TGTGCCAGCACCCAGGGACTAGCGGGAGGTTTTTACGAGCAGTACTTC	:::::::::0:-3:14:14:0:-1:29:33:-4:48:::
58	TGTGCCAGCACCCCAGGATCGAGCTCCTACGAGCAGTACTTC	TRBV28		TRBJ2-7	TRBV28	TRBJ2	CASTPGSSSYEQYF	TGTGCCAGCACCCCAGGATCGAGCTCCTACGAGCAGTACTTC	:::::::::0:-7:10:::::20:3:42:::
59	TGTGCCAGCACCTCTAAGGGCGGGAGGGACAATGAGCAGTTCTTC	TRBV6-4	TRBD2	TRBJ2-1	TRBV6	TRBJ2	CASTSKGGRDNEQFF	TGTGCCAGCACCTCTAAGGGCGGGAGGGACAATGAGCAGTTCTTC	:::::::::0:-7:10:19:-7:0:28:28:-5:45:::
60	TGTGCCAGCAGAGGACTAGCCGAAGAGACCCAGTACTTC	TRBV6-5	TRBD2	TRBJ2-5	TRBV6	TRBJ2	CASRGLAEETQYF	TGTGCCAGCAGAGGACTAGCCGAAGAGACCCAGTACTTC	:::::::::0:-6:11:12:-1:-7:20:22:-3:39:::
61	TGTGCCAGCAGCAATGGGGCAGGACCGAGGAATGAGCAGTTCTTC	TRBV4-2	TRBD1	TRBJ2-1	TRBV4	TRBJ2	CASSNGAGPRNEQFF	TGTGCCAGCAGCAATGGGGCAGGACCGAGGAATGAGCAGTTCTTC	:::::::::0:-5:12:15:-7:0:20:30:-7:45:::
62	TGTGCCAGCAGCACACAGGGAGGGACTAGCTCCTACAATGAGCAGTTCTTC	TRBV5-4	TRBD2	TRBJ2-1	TRBV5	TRBJ2	CASSTQGGTSSYNEQFF	TGTGCCAGCAGCACACAGGGAGGGACTAGCTCCTACAATGAGCAGTTCTTC	:::::::::0:-4:12:17:-9:0:24:27:2:51:::
63	TGTGCCAGCAGCACCGACAGGGACGCTGGGAGGGCCCAGCATTTT	TRBV7-9	TRBD1	TRBJ1-5	TRBV7	TRBJ1	CASSTDRDAGRAQHF	TGTGCCAGCAGCACCGACAGGGACGCTGGGAGGGCCCAGCATTTT	:::::::::0:-5:12:15:-2:-3:22:34:-11:45:::
64	TGTGCCAGCAGCACGACAGGGGGGCAAGATCCGTTCTTC	TRBV11-3	TRBD1	TRBJ2-1	TRBV11	TRBJ2	CASSTTGGQDPFF	TGTGCCAGCAGCACGACAGGGGGGCAAGATCCGTTCTTC	:::::::::0:-5:12:14:-2:-1:23:32:-15:39:::
65	TGTGCCAGCAGCAGGGAAGATGGCTACACCTTC	TRBV12-3	TRBD1	TRBJ1-2	TRBV12	TRBJ1	CASSREDGYTF	TGTGCCAGCAGCAGGGAAGATGGCTACACCTTC	:::::::::0:-6:11:11:-4:-3:16:19:-6:33:::
66	TGTGCCAGCAGCCAAACAGCGGGGCGGACAGATACGCAGTATTTT	TRBV3-1	TRBD1	TRBJ2-3	TRBV3	TRBJ2	CASSQTAGRTDTQYF	TGTGCCAGCAGCCAAACAGCGGGGCGGACAGATACGCAGTATTTT	:::::::::0:-2:15:20:-7:1:26:27:-3:45:::
67	TGTGCCAGCAGCCAAACTAGCGGGAGGAGCTCCTACGAGCAGTACTTC	TRBV3-1	TRBD2	TRBJ2-7	TRBV3	TRBJ2	CASSQTSGRSSYEQYF	TGTGCCAGCAGCCAAACTAGCGGGAGGAGCTCCTACGAGCAGTACTTC	:::::::::0:-2:15:15:-3:-4:24:24:5:48:::
68	TGTGCCAGCAGCCAAGTAGGAGGACTACACACCGGGGAGCTGTTTTTT	TRBV14	TRBD2	TRBJ2-2	TRBV14	TRBJ2	CASSQVGGLHTGELFF	TGTGCCAGCAGCCAAGTAGGAGGACTACACACCGGGGAGCTGTTTTTT	:::::::::0:-1:16:21:-1:-9:27:28:-3:48:::
69	TGTGCCAGCAGCCACGGACTGGGTCACACCGGGGAGCTGTTTTTT	TRBV7-9	TRBD2	TRBJ2-2	TRBV7	TRBJ2	CASSHGLGHTGELFF	TGTGCCAGCAGCCACGGACTGGGTCACACCGGGGAGCTGTTTTTT	:::::::::0:-5:12:15:-1:-10:20:25:-3:45:::
70	TGTGCCAGCAGCCAGACGGGAGGGTCCTACGAGCAGTACTTC	TRBV3-1	TRBD2	TRBJ2-7	TRBV3	TRBJ2	CASSQTGGSYEQYF	TGTGCCAGCAGCCAGACGGGAGGGTCCTACGAGCAGTACTTC	:::::::::0:-3:14:16:-8:0:24:24:-1:42:::
71	TGTGCCAGCAGCCAGGGGGGCGAGCAGTACTTC	TRBV9	TRBD1	TRBJ2-7	TRBV9	TRBJ2	CASSQGGEQYF	TGTGCCAGCAGCCAGGGGGGCGAGCAGTACTTC	:::::::::0:-4:12:12:-4:-1:19:20:-6:33:::
72	TGTGCCAGCAGCCAGGGGGGGGAAGGGGTCCAAGAGACCCAGTACTTC	TRBV3-1	TRBD1	TRBJ2-5	TRBV3	TRBJ2	CASSQGGEGVQETQYF	TGTGCCAGCAGCCAGGGGGGGGAAGGGGTCCAAGAGACCCAGTACTTC	:::::::::0:-3:14:23:-5:-2:28:29:-1:48:::
73	TGTGCCAGCAGCCCAGGACAGCTATCCTACGAGCAGTACTTC	TRBV5-4	TRBD1	TRBJ2-7	TRBV5	TRBJ2	CASSPGQLSYEQYF	TGTGCCAGCAGCCCAGGACAGCTATCCTACGAGCAGTACTTC	:::::::::0:-4:12:15:-1:-5:21:24:-1:42:::
74	TGTGCCAGCAGCCCCACTAGCGGGCCTTCCTACGAGCAGTACTTC	TRBV3-1	TRBD2	TRBJ2-7	TRBV3	TRBJ2	CASSPTSGPSYEQYF	TGTGCCAGCAGCCCCACTAGCGGGCCTTCCTACGAGCAGTACTTC	:::::::::0:-4:13:15:-3:-4:24:27:-1:45:::
75	TGTGCCAGCAGCCCCGCGGAGGACGATACCGGGGAGCTGTTTTTT	TRBV4-2	TRBD2	TRBJ2-2	TRBV4	TRBJ2	CASSPAEDDTGELFF	TGTGCCAGCAGCCCCGCGGAGGACGATACCGGGGAGCTGTTTTTT	:::::::::0:-4:13:17:-10:-1:22:27:-5:45:::
76	TGTGCCAGCAGCCCGACGGGACTACGCTACGAGCAGTACTTC	TRBV5-6	TRBD2	TRBJ2-7	TRBV5	TRBJ2	CASSPTGLRYEQYF	TGTGCCAGCAGCCCGACGGGACTACGCTACGAGCAGTACTTC	:::::::::0:-4:12:16:1:-9:24:26:-3:42:::
77	TGTGCCAGCAGCCCGGGACTAGCGGCCTACGAGCAGTACTTC	TRBV3-1	TRBD2	TRBJ2-7	TRBV3	TRBJ2	CASSPGLAAYEQYF	TGTGCCAGCAGCCCGGGACTAGCGGCCTACGAGCAGTACTTC	:::::::::0:-4:13:13:1:-5:25:25:-2:42:::
78	TGTGCCAGCAGCCCGGGACTAGCGGTCAACAATGAGCAGTTCTTC	TRBV6-5	TRBD2	TRBJ2-1	TRBV6	TRBJ2	CASSPGLAVNNEQFF	TGTGCCAGCAGCCCGGGACTAGCGGTCAACAATGAGCAGTTCTTC	:::::::::0:-6:11:11:3:-5:25:28:-5:45:::
79	TGTGCCAGCAGCCCTCGGACTAGCGGAGCGGATCAAGAGACCCAGTACTTC	TRBV9	TRBD2	TRBJ2-5	TRBV9	TRBJ2	CASSPRTSGADQETQYF	TGTGCCAGCAGCCCTCGGACTAGCGGAGCGGATCAAGAGACCCAGTACTTC	:::::::::0:-4:12:16:-1:-5:26:33:-2:51:::
80	TGTGCCAGCAGCCGGGGACAGGGCTACGAGCAGTACTTC	TRBV13	TRBD1	TRBJ2-7	TRBV13	TRBJ2	CASSRGQGYEQYF	TGTGCCAGCAGCCGGGGACAGGGCTACGAGCAGTACTTC	:::::::::0:-5:12:14:0:-3:23:23:-3:39:::
81	TGTGCCAGCAGCCTCTCCGGGACCCCATACAATGAGCAGTTCTTC	TRBV9	TRBD1	TRBJ2-1	TRBV9	TRBJ2	CASSLSGTPYNEQFF	TGTGCCAGCAGCCTCTCCGGGACCCCATACAATGAGCAGTTCTTC	:::::::::0:-4:12:16:2:-7:23:27:-4:45:::
82	TGTGCCAGCAGCCTTGGGACAGCCTTCAGACAGCCCCAGCATTTT	TRBV28	TRBD1	TRBJ1-5	TRBV28	TRBJ1	CASSLGTAFRQPQHF	TGTGCCAGCAGCCTTGGGACAGCCTTCAGACAGCCCCAGCATTTT	:::::::::0:-6:11:15:0:-5:22:30:-7:45:::
83	TGTGCCAGCAGCGCCGGGACAGTCTACGAGCAGTACTTC	TRBV9	TRBD1	TRBJ2-7	TRBV9	TRBJ2	CASSAGTVYEQYF	TGTGCCAGCAGCGCCGGGACAGTCTACGAGCAGTACTTC	:::::::::0:-3:13:13:2:-5:22:23:-3:39:::
84	TGTGCCAGCAGCGGAGCGGGACCCGCCTACGAGCAGTACTTC	TRBV9	TRBD1	TRBJ2-7	TRBV9	TRBJ2	CASSGAGPAYEQYF	TGTGCCAGCAGCGGAGCGGGACCCGCCTACGAGCAGTACTTC	:::::::::0:1:17:17:0:-7:22:25:-2:42:::
85	TGTGCCAGCAGCGTACTGGCGGGAGGGGCAGATGAGCAGTTCTTC	TRBV9	TRBD2	TRBJ2-1	TRBV9	TRBJ2	CASSVLAGGADEQFF	TGTGCCAGCAGCGTACTGGCGGGAGGGGCAGATGAGCAGTTCTTC	:::::::::0:-1:15:18:-7:0:27:31:-8:45:::
86	TGTGCCAGCAGCGTAGAAGGGCAAAGATACTACAATGAGCAGTTCTTC	TRBV9	TRBD2	TRBJ2-1	TRBV9	TRBJ2	CASSVEGQRYYNEQFF	TGTGCCAGCAGCGTAGAAGGGCAAAGATACTACAATGAGCAGTTCTTC	:::::::::0:0:16:17:-12:1:22:29:-3:48:::
87	TGTGCCAGCAGCGTAGCAGCTAGCGGAACCTACGAGCAGTACTTC	TRBV9	TRBD2	TRBJ2-7	TRBV9	TRBJ2	CASSVAASGTYEQYF	TGTGCCAGCAGCGTAGCAGCTAGCGGAACCTACGAGCAGTACTTC	:::::::::0:1:17:19:-4:-5:26:28:-2:45:::
88	TGTGCCAGCAGCGTAGCGGGAGAAGCCTACGAGCAGTACTTC	TRBV9	TRBD2	TRBJ2-7	TRBV9	TRBJ2	CASSVAGEAYEQYF	TGTGCCAGCAGCGTAGCGGGAGAAGCCTACGAGCAGTACTTC	:::::::::0:1:17:17:-9:-2:22:25:-2:42:::
89	TGTGCCAGCAGCGTAGCTGCCCAAGGGTACGAGCAGTACTTC	TRBV9		TRBJ2-7	TRBV9	TRBJ2	CASSVAAQGYEQYF	TGTGCCAGCAGCGTAGCTGCCCAAGGGTACGAGCAGTACTTC	:::::::::0:2:18:::::27:-4:42:::
90	TGTGCCAGCAGCGTAGGTTCCGCGGCCTACGAGCAGTACTTC	TRBV9		TRBJ2-7	TRBV9	TRBJ2	CASSVGSAAYEQYF	TGTGCCAGCAGCGTAGGTTCCGCGGCCTACGAGCAGTACTTC	:::::::::0:0:16:::::25:-2:42:::
91	TGTGCCAGCAGCGTATCGGGACTGGGCTACAATGAGCAGTTCTTC	TRBV9	TRBD2	TRBJ2-1	TRBV9	TRBJ2	CASSVSGLGYNEQFF	TGTGCCAGCAGCGTATCGGGACTGGGCTACAATGAGCAGTTCTTC	:::::::::0:-1:15:16:1:-10:23:26:-3:45:::
92	TGTGCCAGCAGCGTATTGGCGGGAGGGGCAGATGAGCAGTTCTTC	TRBV9	TRBD2	TRBJ2-1	TRBV9	TRBJ2	CASSVLAGGADEQFF	TGTGCCAGCAGCGTATTGGCGGGAGGGGCAGATGAGCAGTTCTTC	:::::::::0:-1:15:18:-7:0:27:31:-8:45:::
93	TGTGCCAGCAGCGTCCAGACAGGGTTTGCTGAAGCTTTCTTT	TRBV9	TRBD1	TRBJ1-1	TRBV9	TRBJ1	CASSVQTGFAEAFF	TGTGCCAGCAGCGTCCAGACAGGGTTTGCTGAAGCTTTCTTT	:::::::::0:-2:14:17:-2:-3:24:28:-6:42:::
94	TGTGCCAGCAGCGTGGGACAAGAGGCCTACGAGCAGTACTTC	TRBV9	TRBD1	TRBJ2-7	TRBV9	TRBJ2	CASSVGQEAYEQYF	TGTGCCAGCAGCGTGGGACAAGAGGCCTACGAGCAGTACTTC	:::::::::0:-2:14:14:0:-6:20:25:-2:42:::
95	TGTGCCAGCAGCGTGGGACAGGAGGCCTACGAGCAGTACTTC	TRBV9	TRBD1	TRBJ2-7	TRBV9	TRBJ2	CASSVGQEAYEQYF	TGTGCCAGCAGCGTGGGACAGGAGGCCTACGAGCAGTACTTC	:::::::::0:-2:14:14:0:-4:22:25:-2:42:::
96	TGTGCCAGCAGCTACCCAGGGACCTACGAGCAGTACTTC	TRBV5-1	TRBD1	TRBJ2-7	TRBV5	TRBJ2	CASSYPGTYEQYF	TGTGCCAGCAGCTACCCAGGGACCTACGAGCAGTACTTC	:::::::::0:-3:13:16:-4:-3:21:22:-2:39:::
97	TGTGCCAGCAGCTACCCCGAATACCAAGAGACCCAGTACTTC	TRBV2		TRBJ2-5	TRBV2	TRBJ2	CASSYPEYQETQYF	TGTGCCAGCAGCTACCCCGAATACCAAGAGACCCAGTACTTC	:::::::::0:-6:11:::::21:1:42:::
98	TGTGCCAGCAGCTCCATGGACAGGGGCTCCTACAATGAGCAGTTCTTC	TRBV12-3		TRBJ2-1	TRBV12	TRBJ2	CASSSMDRGSYNEQFF	TGTGCCAGCAGCTCCATGGACAGGGGCTCCTACAATGAGCAGTTCTTC	:::::::::0:-6:11:::::21:5:48:::
99	TGTGCCAGCAGCTCCCGACTAAGACTGACTAGCGGGACCATTTTGTACGAGCAGTACTTC	TRBV11-2	TRBD2	TRBJ2-7	TRBV11	TRBJ2	CASSSRLRLTSGTILYEQYF	TGTGCCAGCAGCTCCCGACTAAGACTGACTAGCGGGACCATTTTGTACGAGCAGTACTTC	:::::::::0:-4:13:26:-2:-3:37:45:-4:60:::
100	TGTGCCAGCAGCTCCGGACGGGAAGGCAGACGGTACGAGCAGTACTTC	TRBV5-6	TRBD2	TRBJ2-7	TRBV5	TRBJ2	CASSSGREGRRYEQYF	TGTGCCAGCAGCTCCGGACGGGAAGGCAGACGGTACGAGCAGTACTTC	:::::::::0:-3:13:18:-8:1:27:33:-4:48:::
101	TGTGCCAGCAGCTCCGGGACTAGCGGGAGTCAGACCCAGTACTTC	TRBV7-3	TRBD2	TRBJ2-5	TRBV7	TRBJ2	CASSSGTSGSQTQYF	TGTGCCAGCAGCTCCGGGACTAGCGGGAGTCAGACCCAGTACTTC	:::::::::0:-4:13:13:2:-2:29:31:-6:45:::
102	TGTGCCAGCAGCTCCGGGGGGAGCTCCTACAATGAGCAGTTCTTC	TRBV27	TRBD1	TRBJ2-1	TRBV27	TRBJ2	CASSSGGSSYNEQFF	TGTGCCAGCAGCTCCGGGGGGAGCTCCTACAATGAGCAGTTCTTC	:::::::::0:-6:11:13:2:-9:18:19:4:45:::
103	TGTGCCAGCAGCTCCTCCGGGACAGGGTACGAAAAACTGTTTTTT	TRBV9	TRBD1	TRBJ1-4	TRBV9	TRBJ1	CASSSSGTGYEKLFF	TGTGCCAGCAGCTCCTCCGGGACAGGGTACGAAAAACTGTTTTTT	:::::::::0:-4:12:16:2:-3:27:30:-8:45:::
104	TGTGCCAGCAGCTGGAGGGCAACGCAGTGGAACACTGAAGCTTTCTTT	TRBV5-6	TRBD2	TRBJ1-1	TRBV5	TRBJ1	CASSWRATQWNTEAFF	TGTGCCAGCAGCTGGAGGGCAACGCAGTGGAACACTGAAGCTTTCTTT	:::::::::0:-3:13:13:-10:1:20:29:-1:48:::
105	TGTGCCAGCAGCTGGGGTTCGGGTCAGCCCCAGCATTTT	TRBV5-6		TRBJ1-5	TRBV5	TRBJ1	CASSWGSGQPQHF	TGTGCCAGCAGCTGGGGTTCGGGTCAGCCCCAGCATTTT	:::::::::0:-3:13:::::23:-6:39:::
106	TGTGCCAGCAGCTTAACGGGGGCAACTAATGAAAAACTGTTTTTT	TRBV11-3		TRBJ1-4	TRBV11	TRBJ1	CASSLTGATNEKLFF	TGTGCCAGCAGCTTAACGGGGGCAACTAATGAAAAACTGTTTTTT	:::::::::0:-2:15:::::21:1:45:::
107	TGTGCCAGCAGCTTAAGGACTTTTCAAAACACAGATACGCAGTATTTT	TRBV7-8	TRBD2	TRBJ2-3	TRBV7	TRBJ2	CASSLRTFQNTDTQYF	TGTGCCAGCAGCTTAAGGACTTTTCAAAACACAGATACGCAGTATTTT	:::::::::0:-2:15:16:-1:-10:21:29:-2:48:::
108	TGTGCCAGCAGCTTACACACTAGCGCCTACGAGCAGTACTTC	TRBV11-2		TRBJ2-7	TRBV11	TRBJ2	CASSLHTSAYEQYF	TGTGCCAGCAGCTTACACACTAGCGCCTACGAGCAGTACTTC	:::::::::0:-2:15:::::21:2:42:::
109	TGTGCCAGCAGCTTACCCGCTGAGCAGCCGAGTATCACTGAAGCTTTCTTT	TRBV7-2	TRBD2	TRBJ1-1	TRBV7	TRBJ1	CASSLPAEQPSITEAFF	TGTGCCAGCAGCTTACCCGCTGAGCAGCCGAGTATCACTGAAGCTTTCTTT	:::::::::0:-2:15:15:12:-22:21:35:-4:51:::
110	TGTGCCAGCAGCTTAGAAGATAGGCTAGTCGTAGATACGCAGTATTTT	TRBV7-8	TRBD2	TRBJ2-3	TRBV7	TRBJ2	CASSLEDRLVVDTQYF	TGTGCCAGCAGCTTAGAAGATAGGCTAGTCGTAGATACGCAGTATTTT	:::::::::0:-1:16:23:9:-18:30:32:-5:48:::
111	TGTGCCAGCAGCTTAGAGAGGACTAGCGGGAACACCGGGGAGCTGTTTTTT	TRBV11-2	TRBD2	TRBJ2-2	TRBV11	TRBJ2	CASSLERTSGNTGELFF	TGTGCCAGCAGCTTAGAGAGGACTAGCGGGAACACCGGGGAGCTGTTTTTT	:::::::::0:0:17:19:-1:-5:29:29:-1:51:::
112	TGTGCCAGCAGCTTAGATGCGGGTCAGCACCAGCATTTT	TRBV11-2	TRBD2	TRBJ1-5	TRBV11	TRBJ1	CASSLDAGQHQHF	TGTGCCAGCAGCTTAGATGCGGGTCAGCACCAGCATTTT	:::::::::0:1:18:18:-7:-4:23:23:-6:39:::
113	TGTGCCAGCAGCTTAGATGCGGGTCAGCCCCAGCATTTT	TRBV11-2	TRBD2	TRBJ1-5	TRBV11	TRBJ1	CASSLDAGQPQHF	TGTGCCAGCAGCTTAGATGCGGGTCAGCCCCAGCATTTT	:::::::::0:1:18:18:-7:-4:23:23:-6:39:::
114	TGTGCCAGCAGCTTAGCGGGGGCAGCCTACGAGCAGTACTTC	TRBV11-2	TRBD1	TRBJ2-7	TRBV11	TRBJ2	CASSLAGAAYEQYF	TGTGCCAGCAGCTTAGCGGGGGCAGCCTACGAGCAGTACTTC	:::::::::0:-1:16:17:-6:0:23:25:-2:42:::
115	TGTGCCAGCAGCTTAGGCGTGAACAATGAGCAGTTCTTC	TRBV11-3		TRBJ2-1	TRBV11	TRBJ2	CASSLGVNNEQFF	TGTGCCAGCAGCTTAGGCGTGAACAATGAGCAGTTCTTC	:::::::::0:-1:16:::::22:-5:39:::
116	TGTGCCAGCAGCTTAGGGACAGGGACGGAAGCTTTCTTT	TRBV13	TRBD1	TRBJ1-1	TRBV13	TRBJ1	CASSLGTGTEAFF	TGTGCCAGCAGCTTAGGGACAGGGACGGAAGCTTTCTTT	:::::::::0:0:17:17:-2:-3:24:27:-8:39:::
117	TGTGCCAGCAGCTTCCCGGGACAAGGGTACGAGCAGTACTTC	TRBV7-2	TRBD1	TRBJ2-7	TRBV7	TRBJ2	CASSFPGQGYEQYF	TGTGCCAGCAGCTTCCCGGGACAAGGGTACGAGCAGTACTTC	:::::::::0:-3:14:14:3:-2:27:27:-4:42:::
118	TGTGCCAGCAGCTTCCCGGGACAGGGGTACGAGCAGTACTTC	TRBV7-2	TRBD1	TRBJ2-7	TRBV7	TRBJ2	CASSFPGQGYEQYF	TGTGCCAGCAGCTTCCCGGGACAGGGGTACGAGCAGTACTTC	:::::::::0:-3:14:14:3:-2:27:27:-4:42:::
119	TGTGCCAGCAGCTTCCGAACTTACGAGCAGTACTTC	TRBV7-2		TRBJ2-7	TRBV7	TRBJ2	CASSFRTYEQYF	TGTGCCAGCAGCTTCCGAACTTACGAGCAGTACTTC	:::::::::0:-3:14:::::21:-4:36:::
120	TGTGCCAGCAGCTTGTCACCCAGTGAGCAGTACTTC	TRBV5-6		TRBJ2-7	TRBV5	TRBJ2	CASSLSPSEQYF	TGTGCCAGCAGCTTGTCACCCAGTGAGCAGTACTTC	:::::::::0:-1:15:::::24:-7:36:::
121	TGTGCCAGCAGCTTGTCGCCCAGTGAGCAGTACTTC	TRBV5-6	TRBD1	TRBJ2-7	TRBV5	TRBJ2	CASSLSPSEQYF	TGTGCCAGCAGCTTGTCGCCCAGTGAGCAGTACTTC	:::::::::0:-1:15:16:-11:4:21:24:-7:36:::
122	TGTGCCAGCAGGCCTCTAGCGGGACCGGAGACCCAGTACTTC	TRBV7-6	TRBD2	TRBJ2-5	TRBV7	TRBJ2	CASRPLAGPETQYF	TGTGCCAGCAGGCCTCTAGCGGGACCGGAGACCCAGTACTTC	:::::::::0:-6:11:15:-4:-3:24:27:-5:42:::
123	TGTGCCAGCAGGCCTCTAGTGGGACCAGAGACCCAGTACTTC	TRBV7-6	TRBD2	TRBJ2-5	TRBV7	TRBJ2	CASRPLVGPETQYF	TGTGCCAGCAGGCCTCTAGTGGGACCAGAGACCCAGTACTTC	:::::::::0:-6:11:15:-4:-3:24:26:-4:42:::
124	TGTGCCAGCAGGGCGGGAAGGGAATCCGGTTCACCCCTCCACTTT	TRBV6-1	TRBD2	TRBJ1-6	TRBV6	TRBJ1	CASRAGRESGSPLHF	TGTGCCAGCAGGGCGGGAAGGGAATCCGGTTCACCCCTCCACTTT	:::::::::0:-6:11:12:-7:-3:18:29:-9:45:::
125	TGTGCCAGCAGGGCGGGGAGGGAATCCGGTTCACCCCTCCACTTT	TRBV6-1	TRBD2	TRBJ1-6	TRBV6	TRBJ1	CASRAGRESGSPLHF	TGTGCCAGCAGGGCGGGGAGGGAATCCGGTTCACCCCTCCACTTT	:::::::::0:-6:11:15:-9:0:22:29:-9:45:::
126	TGTGCCAGCAGTCAAGCACTAGCGGGAGGGTCCGGACGGGAGACCCAGTACTTC	TRBV6-1	TRBD2	TRBJ2-5	TRBV6	TRBJ2	CASSQALAGGSGRETQYF	TGTGCCAGCAGTCAAGCACTAGCGGGAGGGTCCGGACGGGAGACCCAGTACTTC	:::::::::0:0:17:17:-3:0:30:39:-5:54:::
127	TGTGCCAGCAGTCCGCATACACAGGGGTTCGAGCAGTACTTC	TRBV27	TRBD1	TRBJ2-7	TRBV27	TRBJ2	CASSPHTQGFEQYF	TGTGCCAGCAGTCCGCATACACAGGGGTTCGAGCAGTACTTC	:::::::::0:-5:12:20:-3:-2:27:29:-6:42:::
128	TGTGCCAGCAGTCCGGGCCCCGCAGGGTCCTACGAGCAGTACTTC	TRBV12-4	TRBD2	TRBJ2-7	TRBV12	TRBJ2	CASSPGPAGSYEQYF	TGTGCCAGCAGTCCGGGCCCCGCAGGGTCCTACGAGCAGTACTTC	:::::::::0:-5:12:14:-13:3:20:27:-1:45:::
129	TGTGCCAGCAGTCCGGGGCCCAACAATGAGCAGTTCTTC	TRBV6-5	TRBD2	TRBJ2-1	TRBV6	TRBJ2	CASSPGPNNEQFF	TGTGCCAGCAGTCCGGGGCCCAACAATGAGCAGTTCTTC	:::::::::0:-5:12:15:-13:3:21:22:-5:39:::
130	TGTGCCAGCAGTCGAAACAATGAGCAGTTCTTC	TRBV7-3		TRBJ2-1	TRBV7	TRBJ2	CASSRNNEQFF	TGTGCCAGCAGTCGAAACAATGAGCAGTTCTTC	:::::::::0:-6:11:::::16:-5:33:::
131	TGTGCCAGCAGTCGATCAAGCTACGAGCAGTACTTC	TRBV5-6		TRBJ2-7	TRBV5	TRBJ2	CASSRSSYEQYF	TGTGCCAGCAGTCGATCAAGCTACGAGCAGTACTTC	:::::::::0:-5:11:::::20:-3:36:::
132	TGTGCCAGCAGTCTCACAGGGCTAGGCTCCTACGAGCAGTACTTC	TRBV6-2	TRBD1	TRBJ2-7	TRBV6	TRBJ2	CASSLTGLGSYEQYF	TGTGCCAGCAGTCTCACAGGGCTAGGCTCCTACGAGCAGTACTTC	:::::::::0:-5:12:15:-3:-3:21:25:1:45:::
133	TGTGCCAGCAGTCTCGGGACAGGGTCCTACGAGCAGTACTTC	TRBV6-5	TRBD1	TRBJ2-7	TRBV6	TRBJ2	CASSLGTGSYEQYF	TGTGCCAGCAGTCTCGGGACAGGGTCCTACGAGCAGTACTTC	:::::::::0:-5:12:14:1:-3:24:24:-1:42:::
134	TGTGCCAGCAGTGAAAAAGCACTAGCGGGGGTATACGAGCAGTACTTC	TRBV25-1	TRBD2	TRBJ2-7	TRBV25	TRBJ2	CASSEKALAGVYEQYF	TGTGCCAGCAGTGAAAAAGCACTAGCGGGGGTATACGAGCAGTACTTC	:::::::::0:-2:15:20:-3:-4:29:33:-4:48:::
135	TGTGCCAGCAGTGAAGCGGAGCTAGCCTACGAGCAGTACTTC	TRBV2	TRBD2	TRBJ2-7	TRBV2	TRBJ2	CASSEAELAYEQYF	TGTGCCAGCAGTGAAGCGGAGCTAGCCTACGAGCAGTACTTC	:::::::::0:1:18:20:9:-20:25:25:-2:42:::
136	TGTGCCAGCAGTGAAGCTCCGACTTTGAAAGATACGCAGTATTTT	TRBV2		TRBJ2-3	TRBV2	TRBJ2	CASSEAPTLKDTQYF	TGTGCCAGCAGTGAAGCTCCGACTTTGAAAGATACGCAGTATTTT	:::::::::0:0:17:::::29:-5:45:::
137	TGTGCCAGCAGTGAATACAGGGACACCGGGGAGCTGTTTTTT	TRBV25-1	TRBD1	TRBJ2-2	TRBV25	TRBJ2	CASSEYRDTGELFF	TGTGCCAGCAGTGAATACAGGGACACCGGGGAGCTGTTTTTT	:::::::::0:0:17:17:-4:-3:22:22:-3:42:::
138	TGTGCCAGCAGTGAGGGGCCTGCGCCCAATGAGCAGTTCTTC	TRBV6-4	TRBD1	TRBJ2-1	TRBV6	TRBJ2	CASSEGPAPNEQFF	TGTGCCAGCAGTGAGGGGCCTGCGCCCAATGAGCAGTTCTTC	:::::::::0:-3:14:14:-7:0:19:26:-6:42:::
139	TGTGCCAGCAGTGGCCAGGTTAATTCACCCCTCCACTTT	TRBV6-5		TRBJ1-6	TRBV6	TRBJ1	CASSGQVNSPLHF	TGTGCCAGCAGTGGCCAGGTTAATTCACCCCTCCACTTT	:::::::::0:-5:12:::::20:-6:39:::
140	TGTGCCAGCAGTGTATCAGGAGTCTCCTACGAGCAGTACTTC	TRBV12-3		TRBJ2-7	TRBV12	TRBJ2	CASSVSGVSYEQYF	TGTGCCAGCAGTGTATCAGGAGTCTCCTACGAGCAGTACTTC	:::::::::0:-5:12:::::17:5:42:::
141	TGTGCCAGCAGTTACAGTAGCGGCTCCTACGAGCAGTACTTC	TRBV6-5	TRBD2	TRBJ2-7	TRBV6	TRBJ2	CASSYSSGSYEQYF	TGTGCCAGCAGTTACAGTAGCGGCTCCTACGAGCAGTACTTC	:::::::::0:-2:15:17:-5:-6:22:22:1:42:::
142	TGTGCCAGCAGTTACGGCTCCTCCTACGAGCAGTACTTC	TRBV6-6		TRBJ2-7	TRBV6	TRBJ2	CASSYGSSYEQYF	TGTGCCAGCAGTTACGGCTCCTCCTACGAGCAGTACTTC	:::::::::0:-2:15:::::20:0:39:::
143	TGTGCCAGCAGTTACGGGGTCTCCTACGAGCAGTACTTC	TRBV6-2		TRBJ2-7	TRBV6	TRBJ2	CASSYGVSYEQYF	TGTGCCAGCAGTTACGGGGTCTCCTACGAGCAGTACTTC	:::::::::0:-2:15:::::20:0:39:::
144	TGTGCCAGCAGTTACTCACCTACCTACGAGCAGTACTTC	TRBV6-2		TRBJ2-7	TRBV6	TRBJ2	CASSYSPTYEQYF	TGTGCCAGCAGTTACTCACCTACCTACGAGCAGTACTTC	:::::::::0:0:17:::::22:-2:39:::
145	TGTGCCAGCAGTTACTCGAATACTGAAGCTTTCTTT	TRBV6-2		TRBJ1-1	TRBV6	TRBJ1	CASSYSNTEAFF	TGTGCCAGCAGTTACTCGAATACTGAAGCTTTCTTT	:::::::::0:2:19:::::17:-1:36:::
146	TGTGCCAGCAGTTACTCGGGGCCCACAGATACGCAGTATTTT	TRBV6-2	TRBD2	TRBJ2-3	TRBV6	TRBJ2	CASSYSGPTDTQYF	TGTGCCAGCAGTTACTCGGGGCCCACAGATACGCAGTATTTT	:::::::::0:1:18:18:-13:2:23:23:-2:42:::
147	TGTGCCAGCAGTTACTCGGGGGGCGGGGAGCTGTTTTTT	TRBV6-2	TRBD1	TRBJ2-2	TRBV6	TRBJ2	CASSYSGGGELFF	TGTGCCAGCAGTTACTCGGGGGGCGGGGAGCTGTTTTTT	:::::::::0:1:18:18:-6:-1:23:23:-7:39:::
148	TGTGCCAGCAGTTCCCCCTCCAGCTCTGGGGCCAACGTCCTGACTTTC	TRBV6-5	TRBD1	TRBJ2-6	TRBV6	TRBJ2	CASSSPSSSGANVLTF	TGTGCCAGCAGTTCCCCCTCCAGCTCTGGGGCCAACGTCCTGACTTTC	:::::::::0:-4:13:13:11:-17:19:21:2:48:::
149	TGTGCCAGCAGTTTACAACTAGCGGGAGTAGTCGAGCAGTACTTC	TRBV27	TRBD2	TRBJ2-7	TRBV27	TRBJ2	CASSLQLAGVVEQYF	TGTGCCAGCAGTTTACAACTAGCGGGAGTAGTCGAGCAGTACTTC	:::::::::0:-2:15:17:-3:-2:28:32:-6:45:::
150	TGTGCCAGCAGTTTACCGGGCCAGCCCCAGCATTTT	TRBV12-3	TRBD1	TRBJ1-5	TRBV12	TRBJ1	CASSLPGQPQHF	TGTGCCAGCAGTTTACCGGGCCAGCCCCAGCATTTT	:::::::::0:-2:15:15:2:-9:20:21:-7:36:::
151	TGTGCCAGCAGTTTATCGCGACAGGATGGCCACGAGCAGTACTTC	TRBV27	TRBD1	TRBJ2-7	TRBV27	TRBJ2	CASSLSRQDGHEQYF	TGTGCCAGCAGTTTATCGCGACAGGATGGCCACGAGCAGTACTTC	:::::::::0:1:18:19:-2:-4:25:31:-5:45:::
152	TGTGCCAGCAGTTTTTCTAGCGGAAACTACGAGCAGTACTTC	TRBV12-3	TRBD2	TRBJ2-7	TRBV12	TRBJ2	CASSFSSGNYEQYF	TGTGCCAGCAGTTTTTCTAGCGGAAACTACGAGCAGTACTTC	:::::::::0:-3:14:16:-4:-5:23:26:-3:42:::
153	TGTGCCAGCATCAAAAGGGAGGAAAGGACCGCATTTTTT	TRBV6-2	TRBD2	TRBJ1-4	TRBV6	TRBJ1	CASIKREERTAFF	TGTGCCAGCATCAAAAGGGAGGAAAGGACCGCATTTTTT	:::::::::0:-7:10:16:-9:-1:22:33:-17:39:::
154	TGTGCCAGCCGACTAGCGGGAGACAATGAGCAGTTCTTC	TRBV19	TRBD2	TRBJ2-1	TRBV19	TRBJ2	CASRLAGDNEQFF	TGTGCCAGCCGACTAGCGGGAGACAATGAGCAGTTCTTC	:::::::::0:-9:8:10:-2:-2:22:22:-5:39:::
155	TGTGCCAGCGCCCCTGACAGGGCGTACGAGCAGTACTTC	TRBV4-2	TRBD1	TRBJ2-7	TRBV4	TRBJ2	CASAPDRAYEQYF	TGTGCCAGCGCCCCTGACAGGGCGTACGAGCAGTACTTC	:::::::::0:-8:9:15:-2:-3:22:24:-4:39:::
156	TGTGCCAGCGGATCACGCAACTACGAGCAGTACTTC	TRBV2		TRBJ2-7	TRBV2	TRBJ2	CASGSRNYEQYF	TGTGCCAGCGGATCACGCAACTACGAGCAGTACTTC	:::::::::0:-8:9:::::20:-3:36:::
157	TGTGCCAGCTCACCACCGATATCAAACACTGAAGCTTTCTTT	TRBV18		TRBJ1-1	TRBV18	TRBJ1	CASSPPISNTEAFF	TGTGCCAGCTCACCACCGATATCAAACACTGAAGCTTTCTTT	:::::::::0:1:18:::::24:-2:42:::
158	TGTGCCAGCTCACCCCCGACGGGACTCTCCTACGAGCAGTACTTC	TRBV18	TRBD2	TRBJ2-7	TRBV18	TRBJ2	CASSPPTGLSYEQYF	TGTGCCAGCTCACCCCCGACGGGACTCTCCTACGAGCAGTACTTC	:::::::::0:1:18:19:1:-10:26:26:0:45:::
159	TGTGCCAGCTCCGGAGGTGGCGCCTACGAGCAGTACTTC	TRBV18	TRBD2	TRBJ2-7	TRBV18	TRBJ2	CASSGGGAYEQYF	TGTGCCAGCTCCGGAGGTGGCGCCTACGAGCAGTACTTC	:::::::::0:-6:11:12:-10:-1:17:22:-2:39:::
160	TGTGCCAGCTCGAACGGGGCGGGCGCCAACTACGAGCAGTACTTC	TRBV6-5	TRBD1	TRBJ2-7	TRBV6	TRBJ2	CASSNGAGANYEQYF	TGTGCCAGCTCGAACGGGGCGGGCGCCAACTACGAGCAGTACTTC	:::::::::0:-8:9:20:-8:3:27:29:-3:45:::
161	TGTGCCAGGGGCGTGTGCACACATCTAGCCAAAAACATTCAGTACTTC	TRBV9	TRBD1	TRBJ2-4	TRBV9	TRBJ2	CARGVCTHLAKNIQYF	TGTGCCAGGGGCGTGTGCACACATCTAGCCAAAAACATTCAGTACTTC	:::::::::0:-8:8:8:-8:1:13:24:2:48:::
162	TGTGCCAGTAGCTGGAGGGCAACGCAGTGGAACACTGAAGCTTTCTTT	TRBV5-6	TRBD2	TRBJ1-1	TRBV5	TRBJ1	CASSWRATQWNTEAFF	TGTGCCAGTAGCTGGAGGGCAACGCAGTGGAACACTGAAGCTTTCTTT	:::::::::0:-3:13:13:-10:1:20:29:-1:48:::
163	TGTGCCAGTAGCTTACACACTAGCGCCTACGAGCAGTACTTC	TRBV11-2		TRBJ2-7	TRBV11	TRBJ2	CASSLHTSAYEQYF	TGTGCCAGTAGCTTACACACTAGCGCCTACGAGCAGTACTTC	:::::::::0:-2:15:::::21:2:42:::
164	TGTGCCAGTAGCTTCCGAACTTACGAGCAGTACTTC	TRBV7-2		TRBJ2-7	TRBV7	TRBJ2	CASSFRTYEQYF	TGTGCCAGTAGCTTCCGAACTTACGAGCAGTACTTC	:::::::::0:-3:14:::::21:-4:36:::
165	TGTGCCAGTAGTAATGGCCCCTCCTACGAGCAGTACTTC	TRBV19	TRBD2	TRBJ2-7	TRBV19	TRBJ2	CASSNGPSYEQYF	TGTGCCAGTAGTAATGGCCCCTCCTACGAGCAGTACTTC	:::::::::0:-4:13:15:-14:3:20:20:0:39:::
166	TGTGCCAGTAGTATACGTTCTTCTTACGAGCAGTACTTC	TRBV19		TRBJ2-7	TRBV19	TRBJ2	CASSIRSSYEQYF	TGTGCCAGTAGTATACGTTCTTCTTACGAGCAGTACTTC	:::::::::0:-2:15:::::24:-4:39:::
167	TGTGCCAGTAGTATAGGAAGGGGGCGGAGCACAGATACGCAGTATTTT	TRBV19	TRBD1	TRBJ2-3	TRBV19	TRBJ2	CASSIGRGRSTDTQYF	TGTGCCAGTAGTATAGGAAGGGGGCGGAGCACAGATACGCAGTATTTT	:::::::::0:-1:16:18:-5:1:26:27:0:48:::
168	TGTGCCAGTAGTCCTGGGGTAGCCGAGCAGTACTTC	TRBV19		TRBJ2-7	TRBV19	TRBJ2	CASSPGVAEQYF	TGTGCCAGTAGTCCTGGGGTAGCCGAGCAGTACTTC	:::::::::0:-5:12:::::23:-6:36:::
169	TGTGCCAGTAGTTGGTCGGGACAGGGTAATTCACCCCTCCACTTT	TRBV19	TRBD1	TRBJ1-6	TRBV19	TRBJ1	CASSWSGQGNSPLHF	TGTGCCAGTAGTTGGTCGGGACAGGGTAATTCACCCCTCCACTTT	:::::::::0:-5:12:16:1:-3:26:26:-6:45:::
170	TGTGCCATCAGCCAACAGGGGGCGGGCACTGAAGCTTTCTTT	TRBV10-3	TRBD1	TRBJ1-1	TRBV10	TRBJ1	CAISQQGAGTEAFF	TGTGCCATCAGCCAACAGGGGGCGGGCACTGAAGCTTTCTTT	:::::::::0:-6:11:14:-3:1:24:26:-4:42:::
171	TGTGCCATCAGTGACGGGAGGGGGCCCTCCTACGAGCAGTACTTC	TRBV10-3	TRBD2	TRBJ2-7	TRBV10	TRBJ2	CAISDGRGPSYEQYF	TGTGCCATCAGTGACGGGAGGGGGCCCTCCTACGAGCAGTACTTC	:::::::::0:-3:14:14:-8:0:22:26:0:45:::
172	TGTGCCATCAGTGAGTCCGTAGGGGCTGAAGCTTTCTTT	TRBV10-3	TRBD1	TRBJ1-1	TRBV10	TRBJ1	CAISESVGAEAFF	TGTGCCATCAGTGAGTCCGTAGGGGCTGAAGCTTTCTTT	:::::::::0:0:17:20:-5:-2:25:25:-6:39:::
173	TGTGCCGCCAGCAATACGAGAGCCTACGAGCAGTACTTC	TRBV6-1		TRBJ2-7	TRBV6	TRBJ2	CAASNTRAYEQYF	TGTGCCGCCAGCAATACGAGAGCCTACGAGCAGTACTTC	:::::::::0:-11:6:::::22:-2:39:::
174	TGTGCCGCCAGCAATACGGGAGCCTACGAGCAGTACTTC	TRBV6-1	TRBD2	TRBJ2-7	TRBV6	TRBJ2	CAASNTGAYEQYF	TGTGCCGCCAGCAATACGGGAGCCTACGAGCAGTACTTC	:::::::::0:-11:6:16:-8:-2:22:22:-2:39:::
175	TGTGCCGGCAGCCCGACGGGACTACGCTACGAGCAGTACTTC	TRBV5-6	TRBD2	TRBJ2-7	TRBV5	TRBJ2	CAGSPTGLRYEQYF	TGTGCCGGCAGCCCGACGGGACTACGCTACGAGCAGTACTTC	:::::::::0:-4:12:16:1:-9:24:26:-3:42:::
176	TGTGCCTGGAGTGCTGGGACCGGGGAGCTGTTTTTT	TRBV30		TRBJ2-2	TRBV30	TRBJ2	CAWSAGTGELFF	TGTGCCTGGAGTGCTGGGACCGGGGAGCTGTTTTTT	:::::::::0:-1:13:::::18:-5:36:::
177	TGTGCCTGGAGTGTAGGTCCTGGCGAGCAGTACTTC	TRBV30		TRBJ2-7	TRBV30	TRBJ2	CAWSVGPGEQYF	TGTGCCTGGAGTGTAGGTCCTGGCGAGCAGTACTTC	:::::::::0:1:15:::::23:-6:36:::
