# Supplementary material for: Primary and secondary anti-viral response captured by the dynamics and phenotype of individual T cell clones
Source: eLife journal article supplement (doi:10.7554/elife.53704), 2020-02-21
Supplement: supp [file elife-53704-supp-v1.zip › elife_poa_e53704_Figure_4_source_data_2.csv]

clonotype_id	frequency	proportion	cdr3s_aa	cdr3s_nt	aaTRA	aaTRB	ntTRA	ntTRB	a_changed	b_changed	a_dextramer_bulk	b_dextramer_bulk	TRBV	TRBJ	TRAV	TRAJ	M1_45_F1	M1_v2_0_F1	clust1_fraction	clust1_frac_simulation	cluster
clonotype1	152	0,046855734	TRA:CAGAKEEGADGLTF;TRB:CATSAGPEMYEQYF	TRA:TGTGCGGGGGCCAAGGAGGAAGGTGCTGACGGACTCACCTTT;TRB:TGTGCCACCAGCGCTGGGCCGGAGATGTACGAGCAGTACTTC	CAGAKEEGADGLTF	CATSAGPEMYEQYF	TGTGCGGGGGCCAAGGAGGAAGGTGCTGACGGACTCACCTTT	TGTGCCACCAGCGCTGGGCCGGAGATGTACGAGCAGTACTTC	TRUE	TRUE	TRUE	TRUE	TRBV15	TRBJ2-7	TRAV25	TRAJ45	0,000474336	9,68E-05	0,856164384	0,616438356	1
clonotype2	151	0,046547472	TRA:CAVNANKLIF;TRB:CSAPRRQDEQFF	TRA:TGTGCCGTGAACGCAAACAAGCTCATCTTT;TRB:TGCAGTGCCCCCCGGCGGCAGGATGAGCAGTTCTTC	CAVNANKLIF	CSAPRRQDEQFF	TGTGCCGTGAACGCAAACAAGCTCATCTTT	TGCAGTGCCCCCCGGCGGCAGGATGAGCAGTTCTTC	TRUE	TRUE	TRUE	TRUE	TRBV20-1	TRBJ2-1	TRAV12-2	TRAJ32	0,000158995	4,33E-05	0,878378378	0,567567568	1
clonotype3	77	0,023736128	TRA:CAVNNARLMF;TRB:CASSPSPGEAYGYTF	TRA:TGTGCCGTGAACAATGCCAGACTCATGTTT;TRB:TGCGCCAGCAGCCCCTCTCCAGGGGAGGCCTATGGCTACACCTTC	CAVNNARLMF	CASSPSPGEAYGYTF	TGTGCCGTGAACAATGCCAGACTCATGTTT	TGCGCCAGCAGCCCCTCTCCAGGGGAGGCCTATGGCTACACCTTC	FALSE	TRUE	TRUE	TRUE	TRBV4-3	TRBJ1-2	TRAV12-2	TRAJ31	7,55E-05	1,78E-05	0,621621622	0,567567568	1
clonotype4	71	0,02188656	TRA:CAGEETSGSRLTF;TRB:CASSVGGVSYNEQFF	TRA:TGTGCAGGAGAAGAAACCAGTGGCTCTAGGTTGACCTTT;TRB:TGTGCCAGCAGCGTAGGGGGGGTCTCCTACAATGAGCAGTTCTTC	CAGEETSGSRLTF	CASSVGGVSYNEQFF	TGTGCAGGAGAAGAAACCAGTGGCTCTAGGTTGACCTTT	TGTGCCAGCAGCGTAGGGGGGGTCTCCTACAATGAGCAGTTCTTC	FALSE	TRUE	TRUE	TRUE	TRBV9	TRBJ2-1	TRAV27	TRAJ58	4,64E-05	1,27E-05	0,633802817	0,577464789	1
clonotype5	62	0,019112207	TRA:CAAAGGKLIF;TRB:CSAVLPGLAGYNEQFF	TRA:TGTGCCGCCGCAGGAGGAAAGCTTATCTTC;TRB:TGCAGTGCCGTCCTTCCGGGACTAGCGGGTTACAATGAGCAGTTCTTC	CAAAGGKLIF	CSAVLPGLAGYNEQFF	TGTGCCGCCGCAGGAGGAAAGCTTATCTTC	TGCAGTGCCGTCCTTCCGGGACTAGCGGGTTACAATGAGCAGTTCTTC	TRUE	TRUE	TRUE	TRUE	TRBV20-1	TRBJ2-1	TRAV12-2	TRAJ23	0,000105997	1,66E-05	0,868852459	0,68852459	1
clonotype6	60	0,018495684	TRA:CAVCGNQFYF;TRB:CAWSAGLAYEQYF	TRA:TGTGCCGTGTGTGGTAACCAGTTCTATTTT;TRB:TGTGCCTGGAGTGCGGGCCTGGCCTACGAGCAGTACTTC	CAVCGNQFYF	CAWSAGLAYEQYF	TGTGCCGTGTGTGGTAACCAGTTCTATTTT	TGTGCCTGGAGTGCGGGCCTGGCCTACGAGCAGTACTTC	TRUE	TRUE	TRUE	TRUE	TRBV30	TRBJ2-7	TRAV12-2	TRAJ49	6,09E-05	5,09E-06	0,677966102	0,593220339	1
clonotype9	37	0,011405672	TRA:CAGEGIRGADGLTF;TRB:CASSVGGVSYNEQFF	TRA:TGTGCAGGAGAAGGTATAAGAGGTGCTGACGGACTCACCTTT;TRB:TGTGCCAGCAGCGTAGGAGGGGTTTCCTACAATGAGCAGTTCTTC	CAGEGIRGADGLTF	CASSVGGVSYNEQFF	TGTGCAGGAGAAGGTATAAGAGGTGCTGACGGACTCACCTTT	TGTGCCAGCAGCGTAGGAGGGGTTTCCTACAATGAGCAGTTCTTC	TRUE	TRUE	TRUE	TRUE	TRBV9	TRBJ2-1	TRAV27	TRAJ45	5,56E-05	6,37E-06	0,810810811	0,675675676	1
clonotype8	37	0,011405672	TRA:CAVNRDGNQFYF;TRB:CASSGQGAYEQYF	TRA:TGTGCCGTGAACCGAGACGGTAACCAGTTCTATTTT;TRB:TGTGCCAGCAGCGGACAGGGGGCGTACGAGCAGTACTTC	CAVNRDGNQFYF	CASSGQGAYEQYF	TGTGCCGTGAACCGAGACGGTAACCAGTTCTATTTT	TGTGCCAGCAGCGGACAGGGGGCGTACGAGCAGTACTTC	TRUE	TRUE	TRUE	TRUE	TRBV6-1	TRBJ2-7	TRAV12-2	TRAJ49	5,56E-05	5,09E-06	0,486486486	0,540540541	2
clonotype10	35	0,010789149	TRA:CAVNNARLMF;TRB:CASSQDVAGGYGYTF	TRA:TGTGCCGTGAACAATGCCAGACTCATGTTT;TRB:TGTGCCAGCAGCCAAGATGTGGCAGGGGGCTATGGCTACACCTTC	CAVNNARLMF	CASSQDVAGGYGYTF	TGTGCCGTGAACAATGCCAGACTCATGTTT	TGTGCCAGCAGCCAAGATGTGGCAGGGGGCTATGGCTACACCTTC	FALSE	TRUE	TRUE	TRUE	TRBV4-2	TRBJ1-2	TRAV12-2	TRAJ31	4,50E-05	2,55E-06	0,314285714	0,628571429	2
clonotype11	32	0,009864365	TRA:CAVSASKIIF;TRB:CATSGSGNYEQYF	TRA:TGTGCCGTGAGTGCTTCCAAGATAATCTTT;TRB:TGTGCCACCAGCGGGTCCGGCAACTACGAGCAGTACTTC	CAVSASKIIF	CATSGSGNYEQYF	TGTGCCGTGAGTGCTTCCAAGATAATCTTT	TGTGCCACCAGCGGGTCCGGCAACTACGAGCAGTACTTC	TRUE	TRUE	TRUE	TRUE	TRBV15	TRBJ2-7	TRAV12-2	TRAJ3	0,000129846	1,53E-05	0,5625	0,5625	2
clonotype13	30	0,009247842	TRA:CAVNSNTDKLIF;TRB:CASGDRAMPQHF	TRA:TGTGCCGTGAACAGCAACACCGACAAGCTCATCTTT;TRB:TGTGCCAGTGGGGACAGGGCGATGCCCCAGCATTTT	CAVNSNTDKLIF	CASGDRAMPQHF	TGTGCCGTGAACAGCAACACCGACAAGCTCATCTTT	TGTGCCAGTGGGGACAGGGCGATGCCCCAGCATTTT	TRUE	TRUE	TRUE	TRUE	TRBV2	TRBJ1-5	TRAV12-2	TRAJ34	2,38E-05	5,09E-06	0,827586207	0,620689655	1
clonotype12	30	0,009247842	TRA:CVVGDDKIIF;TRB:CASSGQGAYEQFF	TRA:TGTGTGGTGGGGGATGACAAGATCATCTTT;TRB:TGTGCCAGCAGTGGACAGGGGGCATATGAGCAGTTCTTC	CVVGDDKIIF	CASSGQGAYEQFF	TGTGTGGTGGGGGATGACAAGATCATCTTT	TGTGCCAGCAGTGGACAGGGGGCATATGAGCAGTTCTTC	TRUE	TRUE	TRUE	TRUE	TRBV6-2	TRBJ2-1	TRAV12-1	TRAJ30	2,78E-05	3,82E-06	0,2	0,733333333	2
clonotype14	29	0,008939581	TRA:CAGAPVWNNDMRF;TRB:CASSVGGQGYNEQFF	TRA:TGTGCAGGAGCCCCGGTTTGGAACAATGACATGCGCTTT;TRB:TGTGCCAGCAGCGTCGGGGGACAGGGCTACAATGAGCAGTTCTTC	CAGAPVWNNDMRF	CASSVGGQGYNEQFF	TGTGCAGGAGCCCCGGTTTGGAACAATGACATGCGCTTT	TGTGCCAGCAGCGTCGGGGGACAGGGCTACAATGAGCAGTTCTTC	TRUE	TRUE	TRUE	TRUE	TRBV9	TRBJ2-1	TRAV27	TRAJ43	1,99E-05	5,09E-06	0,517241379	0,724137931	2
clonotype18	25	0,007706535	TRA:CAVGDDKVIF;TRB:CSAPLAGGGNEQFF	TRA:TGTGCCGTGGGGGACGACAAGGTGATATTT;TRB:TGCAGCGCCCCACTAGCGGGGGGAGGGAATGAGCAGTTCTTC	CAVGDDKVIF	CSAPLAGGGNEQFF	TGTGCCGTGGGGGACGACAAGGTGATATTT	TGCAGCGCCCCACTAGCGGGGGGAGGGAATGAGCAGTTCTTC	TRUE	TRUE	TRUE	TRUE	TRBV29-1	TRBJ2-1	TRAV12-2	TRAJ50	3,44E-05	1,27E-05	0,8	0,72	1
clonotype17	25	0,007706535	TRA:CAVEDDKIIF;TRB:CASSESGTGYEQFF	TRA:TGTGCCGTGGAGGATGACAAGATCATCTTT;TRB:TGTGCCAGCAGCGAGTCCGGGACAGGGTATGAGCAGTTCTTC	CAVEDDKIIF	CASSESGTGYEQFF	TGTGCCGTGGAGGATGACAAGATCATCTTT	TGTGCCAGCAGCGAGTCCGGGACAGGGTATGAGCAGTTCTTC	TRUE	FALSE	TRUE	TRUE	TRBV9	TRBJ2-1	TRAV12-2	TRAJ30	0	0	0,652173913	0,47826087	1
clonotype16	25	0,007706535	TRA:CATNSDGQKLLF;TRB:CASSGQGSYEQYV	TRA:TGTGCCACTAATTCAGATGGCCAGAAGCTGCTCTTT;TRB:TGTGCCAGCAGTGGACAGGGCTCCTACGAGCAGTACGTC	CATNSDGQKLLF	CASSGQGSYEQYV	TGTGCCACTAATTCAGATGGCCAGAAGCTGCTCTTT	TGTGCCAGCAGTGGACAGGGCTCCTACGAGCAGTACGTC	TRUE	TRUE	TRUE	TRUE	TRBV6-2	TRBJ2-7	TRAV12-2	TRAJ16	1,32E-05	1,27E-06	0,142857143	0,666666667	2
clonotype20	24	0,007398274	TRA:CAVRSDTDKLIF;TRB:CASSLAQGSYEQYF	TRA:TGTGCTGTCAGATCGGACACCGACAAGCTCATCTTT;TRB:TGTGCCAGCAGCTTAGCGCAAGGTAGCTACGAGCAGTACTTC	CAVRSDTDKLIF	CASSLAQGSYEQYF	TGTGCTGTCAGATCGGACACCGACAAGCTCATCTTT	TGTGCCAGCAGCTTAGCGCAAGGTAGCTACGAGCAGTACTTC	TRUE	TRUE	TRUE	TRUE	TRBV7-6	TRBJ2-7	TRAV41	TRAJ34	0,000124546	1,53E-05	0,869565217	0,565217391	1
clonotype21	23	0,007090012	TRA:CAVEADKLIF;TRB:CASNGAGGYEQYF	TRA:TGTGCCGTGGAGGCCGACAAGCTCATCTTT;TRB:TGTGCCAGCAATGGAGCGGGGGGATACGAGCAGTACTTC	CAVEADKLIF	CASNGAGGYEQYF	TGTGCCGTGGAGGCCGACAAGCTCATCTTT	TGTGCCAGCAATGGAGCGGGGGGATACGAGCAGTACTTC	TRUE	TRUE	TRUE	TRUE	TRBV9	TRBJ2-7	TRAV12-2	TRAJ34	4,64E-05	8,91E-06	0,727272727	0,772727273	2
clonotype22	21	0,00647349	TRA:CALSASKIIF;TRB:CASTPGTESYEQYF	TRA:TGTGCCCTCAGTGCTTCCAAGATAATCTTT;TRB:TGTGCCAGCACCCCCGGGACAGAAAGCTACGAGCAGTACTTC	CALSASKIIF	CASTPGTESYEQYF	TGTGCCCTCAGTGCTTCCAAGATAATCTTT	TGTGCCAGCACCCCCGGGACAGAAAGCTACGAGCAGTACTTC	TRUE	TRUE	TRUE	TRUE	TRBV6-2	TRBJ2-7	TRAV12-2	TRAJ3	1,06E-05	1,27E-06	0,523809524	0,666666667	2
clonotype23	19	0,005856967	TRA:CVVSNEKLTF;TRB:CATGGGISYEQYF	TRA:TGTGTGGTCTCCAATGAGAAATTAACCTTT;TRB:TGTGCCACCGGAGGCGGCATCTCCTACGAGCAGTACTTC	CVVSNEKLTF	CATGGGISYEQYF	TGTGTGGTCTCCAATGAGAAATTAACCTTT	TGTGCCACCGGAGGCGGCATCTCCTACGAGCAGTACTTC	FALSE	FALSE	TRUE	TRUE	0	0	0	0	0	0	0,684210526	0,842105263	1
clonotype24	18	0,005548705	TRA:CAVSQARLMF;TRB:CASSVVGTGAYEQYV	TRA:TGTGCCGTGAGTCAAGCCAGACTCATGTTT;TRB:TGTGCCAGCAGTGTGGTAGGGACAGGGGCCTACGAGCAGTACGTC	CAVSQARLMF	CASSVVGTGAYEQYV	TGTGCCGTGAGTCAAGCCAGACTCATGTTT	TGTGCCAGCAGTGTGGTAGGGACAGGGGCCTACGAGCAGTACGTC	TRUE	TRUE	TRUE	TRUE	TRBV2	TRBJ2-7	TRAV12-2	TRAJ31	0,000125871	1,27E-06	0,4375	0,6875	1
clonotype25	18	0,005548705	TRA:CAVGDDKIIF;TRB:CSAPTGGGSNEQYF	TRA:TGTGCCGTGGGAGATGACAAGATCATCTTT;TRB:TGCAGTGCTCCGACTGGCGGGGGGTCCAACGAGCAGTACTTC	CAVGDDKIIF	CSAPTGGGSNEQYF	TGTGCCGTGGGAGATGACAAGATCATCTTT	TGCAGTGCTCCGACTGGCGGGGGGTCCAACGAGCAGTACTTC	TRUE	TRUE	TRUE	TRUE	TRBV20-1	TRBJ2-7	TRAV12-2	TRAJ30	6,23E-05	8,91E-06	0,555555556	0,5	1
clonotype26	18	0,005548705	TRA:CAVRPDKLIF;TRB:CASSPENSNQPQHF	TRA:TGTGCCGTGAGACCCGACAAGCTCATCTTT;TRB:TGTGCCAGCAGCCCAGAGAATAGCAATCAGCCCCAGCATTTT	CAVRPDKLIF	CASSPENSNQPQHF	TGTGCCGTGAGACCCGACAAGCTCATCTTT	TGTGCCAGCAGCCCAGAGAATAGCAATCAGCCCCAGCATTTT	TRUE	TRUE	TRUE	TRUE	TRBV4-2	TRBJ1-5	TRAV12-2	TRAJ34	2,52E-05	0	0,588235294	0,705882353	1
clonotype27	18	0,005548705	TRA:CAVNNNDMRF;TRB:CATSASTGLEQFF	TRA:TGTGCCGTGAATAACAATGACATGCGCTTT;TRB:TGTGCCACCAGCGCCAGCACAGGGCTTGAGCAGTTCTTC	CAVNNNDMRF	CATSASTGLEQFF	TGTGCCGTGAATAACAATGACATGCGCTTT	TGTGCCACCAGCGCCAGCACAGGGCTTGAGCAGTTCTTC	TRUE	TRUE	TRUE	TRUE	TRBV15	TRBJ2-1	TRAV12-2	TRAJ43	7,68E-05	6,37E-06	0,444444444	0,611111111	2
clonotype34	17	0,005240444	TRA:CVVSSYKLIF;TRB:CASSQTEGGAYGYTF	TRA:TGTGTGGTGAGCAGCTATAAATTGATCTTC;TRB:TGCGCCAGCAGCCAAACCGAAGGGGGTGCTTATGGCTACACCTTC	CVVSSYKLIF	CASSQTEGGAYGYTF	TGTGTGGTGAGCAGCTATAAATTGATCTTC	TGCGCCAGCAGCCAAACCGAAGGGGGTGCTTATGGCTACACCTTC	TRUE	TRUE	TRUE	TRUE	TRBV4-3	TRBJ1-2	TRAV12-1	TRAJ12	9,27E-06	3,82E-06	0,823529412	0,529411765	1
clonotype33	17	0,005240444	TRA:CAVIHARLMF;TRB:CASSPAGGYEQYV	TRA:TGTGCCGTGATCCATGCCAGACTCATGTTT;TRB:TGTGCCAGCAGCCCGGCAGGGGGCTACGAGCAGTACGTC	CAVIHARLMF	CASSPAGGYEQYV	TGTGCCGTGATCCATGCCAGACTCATGTTT	TGTGCCAGCAGCCCGGCAGGGGGCTACGAGCAGTACGTC	TRUE	TRUE	TRUE	TRUE	TRBV11-2	TRBJ2-7	TRAV12-2	TRAJ31	9,27E-06	2,55E-06	0,705882353	0,588235294	1
clonotype32	17	0,005240444	TRA:CAGARVSNYQLIW;TRB:CAISESGTAYNEQFF	TRA:TGTGCAGGAGCGAGGGTTAGCAACTATCAGTTAATCTGG;TRB:TGTGCCATCAGTGAATCCGGGACAGCATACAATGAGCAGTTCTTC	CAGARVSNYQLIW	CAISESGTAYNEQFF	TGTGCAGGAGCGAGGGTTAGCAACTATCAGTTAATCTGG	TGTGCCATCAGTGAATCCGGGACAGCATACAATGAGCAGTTCTTC	TRUE	TRUE	TRUE	TRUE	TRBV10-3	TRBJ2-1	TRAV27	TRAJ33	4,37E-05	7,64E-06	0,25	0,5	2
clonotype31	17	0,005240444	TRA:CVVSDSALIF;TRB:CASSAAGTPAYEQYF	TRA:TGTGTGGTGTCCGATTCTGCTCTGATCTTT;TRB:TGTGCCAGCAGTGCCGCCGGGACCCCTGCCTACGAGCAGTACTTC	CVVSDSALIF	CASSAAGTPAYEQYF	TGTGTGGTGTCCGATTCTGCTCTGATCTTT	TGTGCCAGCAGTGCCGCCGGGACCCCTGCCTACGAGCAGTACTTC	TRUE	TRUE	TRUE	TRUE	TRBV27	TRBJ2-7	TRAV12-1	TRAJ15	1,46E-05	5,09E-06	0,933333333	0,6	1
clonotype30	17	0,005240444	TRA:CAVMNARLMF;TRB:CATSYERNTEAFF	TRA:TGTGCCGTGATGAATGCCAGACTCATGTTT;TRB:TGTGCCACCAGTTATGAGAGGAACACTGAAGCTTTCTTT	CAVMNARLMF	CATSYERNTEAFF	TGTGCCGTGATGAATGCCAGACTCATGTTT	TGTGCCACCAGTTATGAGAGGAACACTGAAGCTTTCTTT	TRUE	TRUE	TRUE	TRUE	TRBV15	TRBJ1-1	TRAV12-2	TRAJ31	3,18E-05	2,55E-06	1	0,625	1
clonotype29	17	0,005240444	TRA:CAVTGYSTLTF;TRB:CASSAAGAYEQYF	TRA:TGTGCCGTGACAGGATACAGCACCCTCACCTTT;TRB:TGTGCCAGCAGTGCCGCAGGGGCCTACGAGCAGTACTTC	CAVTGYSTLTF	CASSAAGAYEQYF	TGTGCCGTGACAGGATACAGCACCCTCACCTTT	TGTGCCAGCAGTGCCGCAGGGGCCTACGAGCAGTACTTC	TRUE	TRUE	TRUE	TRUE	TRBV6-1	TRBJ2-7	TRAV12-2	TRAJ11	1,06E-05	1,27E-06	0,411764706	0,705882353	2
clonotype36	16	0,004932182	TRA:CAGATIRGQKLLF;TRB:CASSVGGSPYNEQFF	TRA:TGTGCAGGAGCAACGATTCGGGGCCAGAAGCTGCTCTTT;TRB:TGTGCCAGCAGCGTAGGAGGATCCCCCTACAATGAGCAGTTCTTC	CAGATIRGQKLLF	CASSVGGSPYNEQFF	TGTGCAGGAGCAACGATTCGGGGCCAGAAGCTGCTCTTT	TGTGCCAGCAGCGTAGGAGGATCCCCCTACAATGAGCAGTTCTTC	TRUE	TRUE	TRUE	TRUE	TRBV9	TRBJ2-1	TRAV27	TRAJ16	2,52E-05	0	0,4	0,466666667	2
clonotype40	15	0,004623921	TRA:CAVNRATDSWGKLQF;TRB:CASLNPGSYEQYF	TRA:TGTGCCGTGAACAGGGCAACTGACAGCTGGGGGAAATTGCAGTTT;TRB:TGTGCCAGCTTAAACCCAGGCTCCTACGAGCAGTACTTC	CAVNRATDSWGKLQF	CASLNPGSYEQYF	TGTGCCGTGAACAGGGCAACTGACAGCTGGGGGAAATTGCAGTTT	TGTGCCAGCTTAAACCCAGGCTCCTACGAGCAGTACTTC	TRUE	TRUE	TRUE	TRUE	TRBV6-5	TRBJ2-7	TRAV12-2	TRAJ24	1,85E-05	2,55E-06	0,307692308	0,538461538	2
clonotype39	15	0,004623921	TRA:CAAMPQRNNDMRF;TRB:CASSAGTGYTEAFF	TRA:TGTGCAGCTATGCCCCAACGGAACAATGACATGCGCTTT;TRB:TGTGCCAGCAGCGCCGGGACAGGGTACACTGAAGCTTTCTTT	CAAMPQRNNDMRF	CASSAGTGYTEAFF	TGTGCAGCTATGCCCCAACGGAACAATGACATGCGCTTT	TGTGCCAGCAGCGCCGGGACAGGGTACACTGAAGCTTTCTTT	TRUE	TRUE	TRUE	TRUE	TRBV9	TRBJ1-1	TRAV27	TRAJ43	2,38E-05	2,55E-06	0,5	0,642857143	2
clonotype42	14	0,00431566	TRA:CAVNGDGQKLLF;TRB:CAISEGGAYEQYF	TRA:TGTGCCGTGAACGGAGATGGCCAGAAGCTGCTCTTT;TRB:TGTGCCATCAGTGAAGGTGGGGCCTACGAGCAGTACTTC	CAVNGDGQKLLF	CAISEGGAYEQYF	TGTGCCGTGAACGGAGATGGCCAGAAGCTGCTCTTT	TGTGCCATCAGTGAAGGTGGGGCCTACGAGCAGTACTTC	TRUE	TRUE	TRUE	TRUE	TRBV10-3	TRBJ2-7	TRAV12-2	TRAJ16	3,05E-05	1,27E-06	0,153846154	0,538461538	2
clonotype43	14	0,00431566	TRA:CAAAGNMLTF;TRB:CASSAGWISYEQYF	TRA:TGTGCCGCTGCAGGCAACATGCTCACCTTT;TRB:TGTGCCAGCAGTGCCGGGTGGATCTCCTACGAGCAGTACTTC	CAAAGNMLTF	CASSAGWISYEQYF	TGTGCCGCTGCAGGCAACATGCTCACCTTT	TGTGCCAGCAGTGCCGGGTGGATCTCCTACGAGCAGTACTTC	TRUE	TRUE	TRUE	TRUE	TRBV2	TRBJ2-7	TRAV12-2	TRAJ39	5,56E-05	1,27E-06	0,857142857	0,571428571	1
clonotype41	14	0,00431566	TRA:CAVIGDSSYKLIF;TRB:CASSGQGAYEQYF	TRA:TGTGCCGTGATCGGGGATAGCAGCTATAAATTGATCTTC;TRB:TGTGCCAGCAGCGGACAGGGGGCCTACGAGCAGTACTTC	CAVIGDSSYKLIF	CASSGQGAYEQYF	TGTGCCGTGATCGGGGATAGCAGCTATAAATTGATCTTC	TGTGCCAGCAGCGGACAGGGGGCCTACGAGCAGTACTTC	TRUE	TRUE	TRUE	TRUE	TRBV6-5	TRBJ2-7	TRAV12-2	TRAJ12	1,59E-05	3,82E-06	0,357142857	0,571428571	2
clonotype46	13	0,004007398	TRA:CAVNGDKIIF;TRB:CASSPAPAYEQYF	TRA:TGTGCCGTGAACGGTGACAAGATCATCTTT;TRB:TGTGCCAGCAGCCCTGCCCCCGCGTACGAGCAGTACTTC	CAVNGDKIIF	CASSPAPAYEQYF	TGTGCCGTGAACGGTGACAAGATCATCTTT	TGTGCCAGCAGCCCTGCCCCCGCGTACGAGCAGTACTTC	TRUE	TRUE	TRUE	TRUE	TRBV7-2	TRBJ2-7	TRAV12-2	TRAJ30	4,77E-05	5,09E-06	0,384615385	0,461538462	2
clonotype47	13	0,004007398	TRA:CAVNANTDKLIF;TRB:CASSPGTGAGYGYTF	TRA:TGTGCCGTGAACGCGAACACCGACAAGCTCATCTTT;TRB:TGCGCCAGCAGCCCCGGGACAGGAGCGGGCTATGGCTACACCTTC	CAVNANTDKLIF	CASSPGTGAGYGYTF	TGTGCCGTGAACGCGAACACCGACAAGCTCATCTTT	TGCGCCAGCAGCCCCGGGACAGGAGCGGGCTATGGCTACACCTTC	TRUE	TRUE	TRUE	TRUE	TRBV5-1	TRBJ1-2	TRAV12-2	TRAJ34	3,97E-05	2,55E-06	0,230769231	0,538461538	2
clonotype44	13	0,004007398	TRA:CAVVGARLMF;TRB:CASSPGTANQPQHF	TRA:TGTGCCGTAGTGGGGGCCAGACTCATGTTT;TRB:TGTGCCAGCAGTCCCGGGACGGCTAATCAGCCCCAGCATTTT	CAVVGARLMF	CASSPGTANQPQHF	TGTGCCGTAGTGGGGGCCAGACTCATGTTT	TGTGCCAGCAGTCCCGGGACGGCTAATCAGCCCCAGCATTTT	TRUE	TRUE	TRUE	TRUE	TRBV27	TRBJ1-5	TRAV12-2	TRAJ31	1,06E-05	2,55E-06	0,083333333	0,666666667	2
clonotype45	13	0,004007398	TRA:CVVDPHARLMF;TRB:CASSYGVSGQFYGYTF	TRA:TGTGTGGTGGATCCCCATGCCAGACTCATGTTT;TRB:TGTGCCAGCAGTTACGGGGTCTCGGGACAGTTCTATGGCTACACCTTC	CVVDPHARLMF	CASSYGVSGQFYGYTF	TGTGTGGTGGATCCCCATGCCAGACTCATGTTT	TGTGCCAGCAGTTACGGGGTCTCGGGACAGTTCTATGGCTACACCTTC	TRUE	TRUE	TRUE	TRUE	TRBV6-2	TRBJ1-2	TRAV12-1	TRAJ31	9,27E-06	1,27E-06	0,307692308	0,461538462	2
clonotype48	13	0,004007398	TRA:CATDAWDSNYQLIW;TRB:CASSFLTPGQVHSGNTIYF	TRA:TGTGCTACGGACGCGTGGGATAGCAACTATCAGTTAATCTGG;TRB:TGTGCCAGCAGCTTCCTTACTCCGGGACAGGTTCACTCTGGAAACACCATATATTTT	CATDAWDSNYQLIW	CASSFLTPGQVHSGNTIYF	TGTGCTACGGACGCGTGGGATAGCAACTATCAGTTAATCTGG	TGTGCCAGCAGCTTCCTTACTCCGGGACAGGTTCACTCTGGAAACACCATATATTTT	FALSE	TRUE	TRUE	TRUE	TRBV11-1	TRBJ1-3	TRAV17	TRAJ33	2,65E-06	2,55E-06	0,615384615	0,538461538	2
clonotype49	13	0,004007398	TRA:CVVTDDKIIF;TRB:CASSLEVLAGVYEQYF	TRA:TGTGTGGTGACCGATGACAAGATCATCTTT;TRB:TGTGCCAGCAGCTTGGAGGTTCTAGCGGGGGTGTACGAGCAGTACTTC	CVVTDDKIIF	CASSLEVLAGVYEQYF	TGTGTGGTGACCGATGACAAGATCATCTTT	TGTGCCAGCAGCTTGGAGGTTCTAGCGGGGGTGTACGAGCAGTACTTC	TRUE	TRUE	TRUE	TRUE	TRBV5-5	TRBJ2-7	TRAV12-1	TRAJ30	3,97E-06	3,82E-06	0,583333333	0,833333333	2
clonotype51	13	0,004007398	TRA:CAGGGLNNNDMRF;TRB:CASSAGGVGYNEQFF	TRA:TGTGCAGGAGGGGGGCTCAATAACAATGACATGCGCTTT;TRB:TGTGCCAGCAGCGCCGGGGGGGTCGGATACAATGAGCAGTTCTTC	CAGGGLNNNDMRF	CASSAGGVGYNEQFF	TGTGCAGGAGGGGGGCTCAATAACAATGACATGCGCTTT	TGTGCCAGCAGCGCCGGGGGGGTCGGATACAATGAGCAGTTCTTC	TRUE	TRUE	TRUE	TRUE	TRBV9	TRBJ2-1	TRAV27	TRAJ43	1,32E-05	0	0	0,5	2
clonotype50	13	0,004007398	TRA:CAGASDKVIF;TRB:CASSAAGEAYEQYF	TRA:TGTGCCGGGGCGAGCGACAAGGTGATATTT;TRB:TGTGCCAGCAGCGCGGCGGGGGAGGCCTACGAGCAGTACTTC	CAGASDKVIF	CASSAAGEAYEQYF	TGTGCCGGGGCGAGCGACAAGGTGATATTT	TGTGCCAGCAGCGCGGCGGGGGAGGCCTACGAGCAGTACTTC	TRUE	TRUE	TRUE	TRUE	TRBV9	TRBJ2-7	TRAV12-2	TRAJ50	6,62E-06	2,55E-06	0	0,461538462	2
clonotype53	13	0,004007398	TRA:CVVSTDKLIF;TRB:CASSAGQNAYEQYF	TRA:TGTGTGGTGTCCACCGACAAGCTCATCTTT;TRB:TGTGCCAGCAGTGCGGGACAGAACGCCTACGAGCAGTACTTC	CVVSTDKLIF	CASSAGQNAYEQYF	TGTGTGGTGTCCACCGACAAGCTCATCTTT	TGTGCCAGCAGTGCGGGACAGAACGCCTACGAGCAGTACTTC	TRUE	TRUE	TRUE	TRUE	TRBV6-1	TRBJ2-7	TRAV12-1	TRAJ34	1,99E-05	0	0,583333333	0,666666667	1
clonotype55	12	0,003699137	TRA:CAGNTDKLIF;TRB:CASSPGGATEAFF	TRA:TGTGCCGGTAACACCGACAAGCTCATCTTT;TRB:TGTGCCAGCAGCCCAGGAGGGGCCACTGAAGCTTTCTTT	CAGNTDKLIF	CASSPGGATEAFF	TGTGCCGGTAACACCGACAAGCTCATCTTT	TGTGCCAGCAGCCCAGGAGGGGCCACTGAAGCTTTCTTT	TRUE	TRUE	TRUE	TRUE	TRBV9	TRBJ1-1	TRAV12-2	TRAJ34	5,30E-06	1,27E-06	0,416666667	0,416666667	2
clonotype56	12	0,003699137	TRA:CAVVASKIIF;TRB:CASFGGAGQPQHF	TRA:TGTGCCGTGGTTGCTTCCAAGATAATCTTT;TRB:TGTGCCAGCTTCGGGGGGGCTGGACAGCCCCAGCATTTT	CAVVASKIIF	CASFGGAGQPQHF	TGTGCCGTGGTTGCTTCCAAGATAATCTTT	TGTGCCAGCTTCGGGGGGGCTGGACAGCCCCAGCATTTT	TRUE	TRUE	TRUE	TRUE	TRBV2	TRBJ1-5	TRAV12-2	TRAJ3	2,78E-05	0	0,75	0,583333333	1
clonotype60	11	0,003390875	TRA:CAVGDDKIIF;TRB:CASGQGAYEQYF	TRA:TGTGCCGTGGGAGATGACAAGATCATCTTT;TRB:TGTGCCAGTGGACAGGGAGCCTACGAGCAGTACTTC	CAVGDDKIIF	CASGQGAYEQYF	TGTGCCGTGGGAGATGACAAGATCATCTTT	TGTGCCAGTGGACAGGGAGCCTACGAGCAGTACTTC	TRUE	TRUE	TRUE	TRUE	TRBV6-2	TRBJ2-7	TRAV12-2	TRAJ30	2,78E-05	5,09E-06	0,454545455	0,636363636	2
clonotype61	11	0,003390875	TRA:CAVSGSKLTF;TRB:CASSPNLQGAWGYTF	TRA:TGTGCCGTCTCGGGGAGTAAACTCACCTTT;TRB:TGTGCCAGCAGCCCCAATCTACAGGGGGCGTGGGGCTACACCTTC	CAVSGSKLTF	CASSPNLQGAWGYTF	TGTGCCGTCTCGGGGAGTAAACTCACCTTT	TGTGCCAGCAGCCCCAATCTACAGGGGGCGTGGGGCTACACCTTC	TRUE	TRUE	TRUE	TRUE	TRBV6-5	TRBJ1-2	TRAV12-2	TRAJ44	1,32E-06	1,27E-06	0,454545455	0,545454545	2
clonotype59	11	0,003390875	TRA:CAVTLYGNKLVF;TRB:CATSRAMNTEAFF	TRA:TGTGCCGTTACACTATATGGAAACAAACTGGTCTTT;TRB:TGTGCCACCAGCAGAGCTATGAACACTGAAGCTTTCTTT	CAVTLYGNKLVF	CATSRAMNTEAFF	TGTGCCGTTACACTATATGGAAACAAACTGGTCTTT	TGTGCCACCAGCAGAGCTATGAACACTGAAGCTTTCTTT	TRUE	TRUE	TRUE	TRUE	TRBV15	TRBJ1-1	TRAV12-2	TRAJ47	3,31E-05	7,64E-06	0,818181818	0,636363636	1
clonotype58	11	0,003390875	TRA:CAVNGDGQKLLF;TRB:CASSYTGAYEQYV	TRA:TGTGCCGTGAACGGTGATGGCCAGAAGCTGCTCTTT;TRB:TGTGCCAGCAGTTACACAGGGGCCTACGAGCAGTACGTC	CAVNGDGQKLLF	CASSYTGAYEQYV	TGTGCCGTGAACGGTGATGGCCAGAAGCTGCTCTTT	TGTGCCAGCAGTTACACAGGGGCCTACGAGCAGTACGTC	TRUE	TRUE	TRUE	TRUE	TRBV6-2	TRBJ2-7	TRAV12-2	TRAJ16	6,62E-06	0	0,4	0,4	2
clonotype57	11	0,003390875	TRA:CAVNGEADSWGKLQF;TRB:CASSKQGEAEAFF	TRA:TGTGCCGTGAACGGGGAAGCCGACAGCTGGGGGAAATTGCAGTTT;TRB:TGTGCCAGCAGTAAGCAGGGGGAAGCTGAAGCTTTCTTT	CAVNGEADSWGKLQF	CASSKQGEAEAFF	TGTGCCGTGAACGGGGAAGCCGACAGCTGGGGGAAATTGCAGTTT	TGTGCCAGCAGTAAGCAGGGGGAAGCTGAAGCTTTCTTT	TRUE	TRUE	TRUE	TRUE	TRBV6-1	TRBJ1-1	TRAV12-2	TRAJ24	7,95E-06	0	0,363636364	0,545454545	2
clonotype63	10	0,003082614	TRA:CAVPLGGYQKVTF;TRB:CASSHGASYEQYV	TRA:TGTGCCGTTCCCCTCGGGGGTTACCAGAAAGTTACCTTT;TRB:TGTGCCAGCAGTCACGGGGCTTCCTACGAGCAGTACGTC	CAVPLGGYQKVTF	CASSHGASYEQYV	TGTGCCGTTCCCCTCGGGGGTTACCAGAAAGTTACCTTT	TGTGCCAGCAGTCACGGGGCTTCCTACGAGCAGTACGTC	TRUE	TRUE	TRUE	TRUE	TRBV28	TRBJ2-7	TRAV12-2	TRAJ13	2,38E-05	5,09E-06	1	0,4	1
clonotype64	10	0,003082614	TRA:CVVTSSIPTF;TRB:CASSGLRGPNEQFF	TRA:TGTGTGGTGACCTCCTCCATACCTACATTT;TRB:TGTGCCAGCAGCGGCCTGAGAGGGCCCAATGAGCAGTTCTTC	CVVTSSIPTF	CASSGLRGPNEQFF	TGTGTGGTGACCTCCTCCATACCTACATTT	TGTGCCAGCAGCGGCCTGAGAGGGCCCAATGAGCAGTTCTTC	TRUE	TRUE	TRUE	TRUE	TRBV9	TRBJ2-1	TRAV12-1	TRAJ6	2,12E-05	0	0,666666667	0,777777778	1
clonotype65	10	0,003082614	TRA:CAVIEARLMF;TRB:CATSRAGAYEQYF	TRA:TGTGCCGTGATAGAAGCCAGACTCATGTTT;TRB:TGTGCCACCAGCAGAGCCGGGGCCTACGAGCAGTACTTC	CAVIEARLMF	CATSRAGAYEQYF	TGTGCCGTGATAGAAGCCAGACTCATGTTT	TGTGCCACCAGCAGAGCCGGGGCCTACGAGCAGTACTTC	TRUE	TRUE	TRUE	TRUE	TRBV15	TRBJ2-7	TRAV12-2	TRAJ31	1,72E-05	2,55E-06	0,3	0,7	2
clonotype66	10	0,003082614	TRA:CVVTSDKLIF;TRB:CAVDSSGVTDTQYF	TRA:TGTGTGGTGACCTCCGACAAGCTCATCTTT;TRB:TGTGCCGTCGACTCTAGCGGGGTCACAGATACGCAGTATTTT	CVVTSDKLIF	CAVDSSGVTDTQYF	TGTGTGGTGACCTCCGACAAGCTCATCTTT	TGTGCCGTCGACTCTAGCGGGGTCACAGATACGCAGTATTTT	TRUE	TRUE	TRUE	TRUE	TRBV2	TRBJ2-3	TRAV12-1	TRAJ34	9,14E-05	2,55E-05	0,75	0,5	1
clonotype73	9	0,002774353	TRA:CAGLSGGYQKVTF;TRB:CASSEWGPGGYTF	TRA:TGTGCAGGACTTTCTGGGGGTTACCAGAAAGTTACCTTT;TRB:TGTGCCAGCAGTGAATGGGGTCCGGGTGGCTACACCTTC	CAGLSGGYQKVTF	CASSEWGPGGYTF	TGTGCAGGACTTTCTGGGGGTTACCAGAAAGTTACCTTT	TGTGCCAGCAGTGAATGGGGTCCGGGTGGCTACACCTTC	TRUE	TRUE	TRUE	TRUE	TRBV2	TRBJ1-2	TRAV27	TRAJ13	1,19E-05	1,27E-06	0,444444444	0,444444444	2
clonotype70	9	0,002774353	TRA:CAVSDDKIIF;TRB:CASSDGTNSYEQYF	TRA:TGTGCCGTGTCAGATGACAAGATCATCTTT;TRB:TGTGCCAGCAGCGATGGGACAAACTCCTACGAGCAGTACTTC	CAVSDDKIIF	CASSDGTNSYEQYF	TGTGCCGTGTCAGATGACAAGATCATCTTT	TGTGCCAGCAGCGATGGGACAAACTCCTACGAGCAGTACTTC	TRUE	TRUE	TRUE	TRUE	TRBV11-2	TRBJ2-7	TRAV12-2	TRAJ30	2,78E-05	2,55E-06	0,555555556	0,555555556	1
clonotype75	9	0,002774353	TRA:CVGGDDKIIF;TRB:CASSQTLSYEQYF	TRA:TGTGTGGGGGGAGATGACAAGATCATCTTT;TRB:TGCGCCAGCAGCCAAACCCTCTCCTACGAGCAGTACTTC	CVGGDDKIIF	CASSQTLSYEQYF	TGTGTGGGGGGAGATGACAAGATCATCTTT	TGCGCCAGCAGCCAAACCCTCTCCTACGAGCAGTACTTC	TRUE	TRUE	TRUE	TRUE	TRBV4-1	TRBJ2-7	TRAV12-1	TRAJ30	9,27E-06	1,27E-06	1	0,333333333	1
clonotype74	9	0,002774353	TRA:CVVSDDKIIF;TRB:CASSDSPGLAYEQYF	TRA:TGTGTGGTGTCAGATGACAAGATCATCTTT;TRB:TGTGCCAGCAGTGACTCCCCGGGACTAGCCTACGAGCAGTACTTC	CVVSDDKIIF	CASSDSPGLAYEQYF	TGTGTGGTGTCAGATGACAAGATCATCTTT	TGTGCCAGCAGTGACTCCCCGGGACTAGCCTACGAGCAGTACTTC	TRUE	TRUE	TRUE	TRUE	TRBV6-6	TRBJ2-7	TRAV12-1	TRAJ30	1,19E-05	0	0,888888889	0,555555556	1
clonotype68	9	0,002774353	TRA:CAGVPDTGNQFYF;TRB:CASSQESVSYNEQFF	TRA:TGTGCAGGAGTGCCCGACACCGGTAACCAGTTCTATTTT;TRB:TGTGCCAGCAGCCAAGAGTCAGTCTCCTACAATGAGCAGTTCTTC	CAGVPDTGNQFYF	CASSQESVSYNEQFF	TGTGCAGGAGTGCCCGACACCGGTAACCAGTTCTATTTT	TGTGCCAGCAGCCAAGAGTCAGTCTCCTACAATGAGCAGTTCTTC	TRUE	TRUE	TRUE	TRUE	TRBV4-2	TRBJ2-1	TRAV27	TRAJ49	0,000100697	8,91E-06	0,5	0,75	2
clonotype69	9	0,002774353	TRA:CAVSGNQFYF;TRB:CASSPGLAYEQYV	TRA:TGTGCCGTGAGCGGTAACCAGTTCTATTTT;TRB:TGTGCCAGCAGTCCCGGGCTAGCCTACGAGCAGTACGTC	CAVSGNQFYF	CASSPGLAYEQYV	TGTGCCGTGAGCGGTAACCAGTTCTATTTT	TGTGCCAGCAGTCCCGGGCTAGCCTACGAGCAGTACGTC	TRUE	TRUE	TRUE	TRUE	TRBV6-5	TRBJ2-7	TRAV12-2	TRAJ49	1,32E-06	0	0,75	0,625	1
clonotype67	9	0,002774353	TRA:CAVGDDKIIF;TRB:CASSPGTGAYEQYF	TRA:TGTGCCGTGGGAGATGACAAGATCATCTTT;TRB:TGTGCCAGCAGTCCGGGGACAGGGGCTTACGAGCAGTACTTC	CAVGDDKIIF	CASSPGTGAYEQYF	TGTGCCGTGGGAGATGACAAGATCATCTTT	TGTGCCAGCAGTCCGGGGACAGGGGCTTACGAGCAGTACTTC	TRUE	TRUE	TRUE	TRUE	TRBV27	TRBJ2-7	TRAV12-2	TRAJ30	2,12E-05	0	0,666666667	0,333333333	1
clonotype79	8	0,002466091	TRA:CAGDNYGQNFVF;TRB:CATSVTGGNSPLHF	TRA:TGTGCCGGGGATAACTATGGTCAGAATTTTGTCTTT;TRB:TGTGCCACCAGCGTGACAGGGGGGAATTCACCCCTCCACTTT	CAGDNYGQNFVF	CATSVTGGNSPLHF	TGTGCCGGGGATAACTATGGTCAGAATTTTGTCTTT	TGTGCCACCAGCGTGACAGGGGGGAATTCACCCCTCCACTTT	TRUE	TRUE	TRUE	TRUE	TRBV15	TRBJ1-6	TRAV12-2	TRAJ26	3,97E-05	5,09E-06	1	0,571428571	1
clonotype78	8	0,002466091	TRA:CVVGDYKLSF;TRB:CATSRDQEGANQPQHF	TRA:TGTGTGGTGGGGGACTACAAGCTCAGCTTT;TRB:TGTGCCACCAGCAGAGATCAAGAGGGAGCCAATCAGCCCCAGCATTTT	CVVGDYKLSF	CATSRDQEGANQPQHF	TGTGTGGTGGGGGACTACAAGCTCAGCTTT	TGTGCCACCAGCAGAGATCAAGAGGGAGCCAATCAGCCCCAGCATTTT	TRUE	TRUE	TRUE	TRUE	TRBV15	TRBJ1-5	TRAV12-1	TRAJ20	2,91E-05	0	0,5	0,875	1
clonotype76	8	0,002466091	TRA:CAVVDDKIIF;TRB:CASSPGAAYEQYF	TRA:TGTGCCGTGGTAGATGACAAGATCATCTTT;TRB:TGTGCCAGCAGCCCCGGGGCGGCCTACGAGCAGTACTTC	CAVVDDKIIF	CASSPGAAYEQYF	TGTGCCGTGGTAGATGACAAGATCATCTTT	TGTGCCAGCAGCCCCGGGGCGGCCTACGAGCAGTACTTC	TRUE	TRUE	TRUE	TRUE	TRBV7-2	TRBJ2-7	TRAV12-2	TRAJ30	5,56E-05	5,09E-06	0,375	0,625	2
clonotype77	8	0,002466091	TRA:CAVAAAGLTF;TRB:CASSPSTSGASYEQYV	TRA:TGTGCCGTGGCTGCGGCCGGGCTCACCTTT;TRB:TGTGCCAGCAGCCCATCAACTAGCGGGGCCTCCTACGAGCAGTACGTC	CAVAAAGLTF	CASSPSTSGASYEQYV	TGTGCCGTGGCTGCGGCCGGGCTCACCTTT	TGTGCCAGCAGCCCATCAACTAGCGGGGCCTCCTACGAGCAGTACGTC	TRUE	TRUE	TRUE	TRUE	TRBV27	TRBJ2-7	TRAV12-2	TRAJ39	1,72E-05	6,37E-06	0,875	0,75	1
clonotype84	8	0,002466091	TRA:CAGAGVRNNDMRF;TRB:CASSVGGTNYNEQFF	TRA:TGTGCAGGAGCGGGGGTTCGGAACAATGACATGCGCTTT;TRB:TGTGCCAGCAGCGTAGGCGGGACAAACTACAATGAGCAGTTCTTC	CAGAGVRNNDMRF	CASSVGGTNYNEQFF	TGTGCAGGAGCGGGGGTTCGGAACAATGACATGCGCTTT	TGTGCCAGCAGCGTAGGCGGGACAAACTACAATGAGCAGTTCTTC	TRUE	TRUE	TRUE	TRUE	TRBV9	TRBJ2-1	TRAV27	TRAJ43	5,30E-06	2,55E-06	0	0,428571429	2
clonotype83	8	0,002466091	TRA:CVVTHDKIIF;TRB:CASSPSGGTAYEQYF	TRA:TGTGTGGTGACCCATGACAAGATCATCTTT;TRB:TGCGCCAGCAGCCCTAGCGGGGGGACCGCCTACGAGCAGTACTTC	CVVTHDKIIF	CASSPSGGTAYEQYF	TGTGTGGTGACCCATGACAAGATCATCTTT	TGCGCCAGCAGCCCTAGCGGGGGGACCGCCTACGAGCAGTACTTC	TRUE	TRUE	TRUE	TRUE	TRBV4-3	TRBJ2-7	TRAV12-1	TRAJ30	2,25E-05	8,91E-06	0,75	0,625	1
clonotype80	8	0,002466091	TRA:CAVGDYKLSF;TRB:CSAPSGGGLNEQFF	TRA:TGTGCCGTAGGCGACTACAAGCTCAGCTTT;TRB:TGCAGTGCCCCGTCCGGAGGGGGCCTTAATGAGCAGTTCTTC	CAVGDYKLSF	CSAPSGGGLNEQFF	TGTGCCGTAGGCGACTACAAGCTCAGCTTT	TGCAGTGCCCCGTCCGGAGGGGGCCTTAATGAGCAGTTCTTC	TRUE	TRUE	TRUE	TRUE	TRBV20-1	TRBJ2-1	TRAV12-2	TRAJ20	1,59E-05	0	0,714285714	0,714285714	1
clonotype91	7	0,00215783	TRA:CAVEDDKIIF;TRB:CASSPGQGAYEQYF	TRA:TGTGCCGTGGAGGATGACAAGATCATCTTT;TRB:TGTGCCAGCAGCCCGGGACAGGGGGCCTACGAGCAGTACTTC	CAVEDDKIIF	CASSPGQGAYEQYF	TGTGCCGTGGAGGATGACAAGATCATCTTT	TGTGCCAGCAGCCCGGGACAGGGGGCCTACGAGCAGTACTTC	TRUE	TRUE	TRUE	TRUE	TRBV3-2	TRBJ2-7	TRAV12-2	TRAJ30	3,97E-06	3,82E-06	1	0,857142857	1
clonotype90	7	0,00215783	TRA:CAVGAQKLVF;TRB:CASTSTGTGAYGYTF	TRA:TGTGCCGTGGGAGCCCAGAAGCTGGTATTT;TRB:TGTGCCAGCACCAGCACCGGGACAGGGGCCTATGGCTACACCTTC	CAVGAQKLVF	CASTSTGTGAYGYTF	TGTGCCGTGGGAGCCCAGAAGCTGGTATTT	TGTGCCAGCACCAGCACCGGGACAGGGGCCTATGGCTACACCTTC	TRUE	TRUE	TRUE	TRUE	TRBV2	TRBJ1-2	TRAV12-2	TRAJ54	5,30E-06	0	0,571428571	0,428571429	2
clonotype93	7	0,00215783	TRA:CAGVPNNNNDMRF;TRB:CASSGGVSYNEQFF	TRA:TGTGCAGGAGTCCCAAACAATAACAATGACATGCGCTTT;TRB:TGTGCCAGCAGCGGGGGCGTCTCCTACAATGAGCAGTTCTTC	CAGVPNNNNDMRF	CASSGGVSYNEQFF	TGTGCAGGAGTCCCAAACAATAACAATGACATGCGCTTT	TGTGCCAGCAGCGGGGGCGTCTCCTACAATGAGCAGTTCTTC	TRUE	TRUE	TRUE	TRUE	TRBV9	TRBJ2-1	TRAV27	TRAJ43	9,27E-06	0	0,428571429	0,571428571	2
clonotype92	7	0,00215783	TRA:CAVSGNKLVF;TRB:CASSTSSTGAYGYTF	TRA:TGTGCCGTGAGTGGAAACAAACTGGTCTTT;TRB:TGCGCCAGCAGCACCTCCTCGACAGGGGCCTATGGCTACACCTTC	CAVSGNKLVF	CASSTSSTGAYGYTF	TGTGCCGTGAGTGGAAACAAACTGGTCTTT	TGCGCCAGCAGCACCTCCTCGACAGGGGCCTATGGCTACACCTTC	TRUE	TRUE	TRUE	TRUE	TRBV5-1	TRBJ1-2	TRAV12-2	TRAJ47	1,32E-06	6,37E-06	0,5	0,833333333	2
clonotype95	7	0,00215783	TRA:CAVTDDKIIF;TRB:CASSPTFVAGANVLTF	TRA:TGTGCCGTGACGGATGACAAGATCATCTTT;TRB:TGTGCCAGCAGCCCCACTTTCGTTGCTGGGGCCAACGTCCTGACTTTC	CAVTDDKIIF	CASSPTFVAGANVLTF	TGTGCCGTGACGGATGACAAGATCATCTTT	TGTGCCAGCAGCCCCACTTTCGTTGCTGGGGCCAACGTCCTGACTTTC	TRUE	TRUE	TRUE	TRUE	TRBV9	TRBJ2-6	TRAV12-2	TRAJ30	1,32E-05	1,27E-06	0,428571429	1	2
clonotype94	7	0,00215783	TRA:CAVGDDKIIF;TRB:CASSPPAGGQGAYEQYF	TRA:TGTGCCGTCGGGGATGACAAGATCATCTTT;TRB:TGTGCCAGCAGCCCCCCCGCTGGGGGACAGGGGGCTTACGAGCAGTACTTC	CAVGDDKIIF	CASSPPAGGQGAYEQYF	TGTGCCGTCGGGGATGACAAGATCATCTTT	TGTGCCAGCAGCCCCCCCGCTGGGGGACAGGGGGCTTACGAGCAGTACTTC	TRUE	TRUE	TRUE	TRUE	TRBV6-1	TRBJ2-7	TRAV12-2	TRAJ30	0	0	0,428571429	0,571428571	2
clonotype97	7	0,00215783	TRA:CAVSGSRLTF;TRB:CASSEGTEAYEQYF	TRA:TGTGCCGTCAGTGGCTCTAGGTTGACCTTT;TRB:TGTGCCAGCAGTGAGGGGACGGAGGCCTACGAGCAGTACTTC	CAVSGSRLTF	CASSEGTEAYEQYF	TGTGCCGTCAGTGGCTCTAGGTTGACCTTT	TGTGCCAGCAGTGAGGGGACGGAGGCCTACGAGCAGTACTTC	TRUE	TRUE	TRUE	TRUE	TRBV6-2	TRBJ2-7	TRAV12-2	TRAJ58	2,12E-05	3,82E-06	0,142857143	0,714285714	2
clonotype96	7	0,00215783	TRA:CAVNTAGQKLLF;TRB:CASSPGWGNYGYTF	TRA:TGTGCCGTGAATACTGCTGGCCAGAAGCTGCTCTTT;TRB:TGTGCCAGCAGCCCCGGTTGGGGAAACTATGGCTACACCTTC	CAVNTAGQKLLF	CASSPGWGNYGYTF	TGTGCCGTGAATACTGCTGGCCAGAAGCTGCTCTTT	TGTGCCAGCAGCCCCGGTTGGGGAAACTATGGCTACACCTTC	TRUE	TRUE	TRUE	TRUE	TRBV28	TRBJ1-2	TRAV12-2	TRAJ16	2,65E-06	0	0,714285714	0,571428571	1
clonotype86	7	0,00215783	TRA:CAGEETSGSRLTF;TRB:CASSVGGVSYNEQFF	TRA:TGTGCAGGAGAAGAAACCAGTGGCTCTAGGTTGACCTTT;TRB:TGTGCCAGCAGCGTAGGAGGGGTCTCCTACAATGAGCAGTTCTTC	CAGEETSGSRLTF	CASSVGGVSYNEQFF	TGTGCAGGAGAAGAAACCAGTGGCTCTAGGTTGACCTTT	TGTGCCAGCAGCGTAGGAGGGGTCTCCTACAATGAGCAGTTCTTC	FALSE	TRUE	TRUE	TRUE	TRBV9	TRBJ2-1	TRAV27	TRAJ58	1,06E-05	0	0,142857143	0,714285714	2
clonotype88	7	0,00215783	TRA:CAVTGDKVIF;TRB:CASSRGDPAYEQYF	TRA:TGTGCCGTGACAGGCGACAAGGTGATATTT;TRB:TGCGCCAGCAGCCGCGGGGACCCAGCCTACGAGCAGTACTTC	CAVTGDKVIF	CASSRGDPAYEQYF	TGTGCCGTGACAGGCGACAAGGTGATATTT	TGCGCCAGCAGCCGCGGGGACCCAGCCTACGAGCAGTACTTC	FALSE	TRUE	TRUE	TRUE	TRBV4-3	TRBJ2-7	TRAV12-2	TRAJ50	7,95E-06	1,27E-06	0,285714286	0,142857143	2
clonotype87	7	0,00215783	TRA:CAVEDNNARLMF;TRB:CASSLAPGSYEQYF	TRA:TGTGCTGTCGAGGATAACAATGCCAGACTCATGTTT;TRB:TGTGCCAGCAGCCTGGCTCCGGGCTCCTACGAGCAGTACTTC	CAVEDNNARLMF	CASSLAPGSYEQYF	TGTGCTGTCGAGGATAACAATGCCAGACTCATGTTT	TGTGCCAGCAGCCTGGCTCCGGGCTCCTACGAGCAGTACTTC	TRUE	TRUE	TRUE	TRUE	TRBV9	TRBJ2-7	TRAV41	TRAJ31	2,12E-05	6,37E-06	1	0,333333333	1
clonotype98	6	0,001849568	TRA:CAVTDDKIIF;TRB:CASSSGTVSYEQYF	TRA:TGTGCCGTGACAGATGACAAGATCATCTTT;TRB:TGTGCCAGCAGCTCAGGGACAGTCTCCTACGAGCAGTACTTC	CAVTDDKIIF	CASSSGTVSYEQYF	TGTGCCGTGACAGATGACAAGATCATCTTT	TGTGCCAGCAGCTCAGGGACAGTCTCCTACGAGCAGTACTTC	TRUE	FALSE	TRUE	TRUE	TRBV6-2	TRBJ2-7	TRAV12-2	TRAJ30	0	0	0,6	0,6	1
clonotype108	6	0,001849568	TRA:CAVTGANNLFF;TRB:CASSPSGGAYGYTF	TRA:TGTGCCGTGACGGGGGCAAACAACCTCTTCTTT;TRB:TGTGCCAGCAGCCCCTCAGGGGGTGCCTATGGCTACACCTTC	CAVTGANNLFF	CASSPSGGAYGYTF	TGTGCCGTGACGGGGGCAAACAACCTCTTCTTT	TGTGCCAGCAGCCCCTCAGGGGGTGCCTATGGCTACACCTTC	TRUE	TRUE	TRUE	TRUE	TRBV6-6	TRBJ1-2	TRAV12-2	TRAJ36	0	0	0,166666667	0,833333333	2
clonotype109	6	0,001849568	TRA:CVVTGSDMRF;TRB:CASSSGPNGAYEQYF	TRA:TGTGTGGTGACGGGCAGTGACATGCGCTTT;TRB:TGTGCCAGCAGTTCAGGGCCGAACGGCGCCTACGAGCAGTACTTC	CVVTGSDMRF	CASSSGPNGAYEQYF	TGTGTGGTGACGGGCAGTGACATGCGCTTT	TGTGCCAGCAGTTCAGGGCCGAACGGCGCCTACGAGCAGTACTTC	TRUE	TRUE	TRUE	TRUE	TRBV6-5	TRBJ2-7	TRAV12-1	TRAJ43	7,95E-06	1,27E-06	0,5	0,833333333	2
clonotype103	6	0,001849568	TRA:CAVTAGANNLFF;TRB:CASSAGGAYEQYF	TRA:TGTGCCGTGACGGCTGGGGCAAACAACCTCTTCTTT;TRB:TGTGCCAGCAGTGCAGGAGGGGCCTACGAGCAGTACTTC	CAVTAGANNLFF	CASSAGGAYEQYF	TGTGCCGTGACGGCTGGGGCAAACAACCTCTTCTTT	TGTGCCAGCAGTGCAGGAGGGGCCTACGAGCAGTACTTC	FALSE	TRUE	TRUE	TRUE	TRBV6-6	TRBJ2-7	TRAV12-2	TRAJ36	5,30E-06	0	0,5	0,333333333	2
clonotype100	6	0,001849568	TRA:CAVTGDDKIIF;TRB:CASTGQGAYEQYF	TRA:TGTGCCGTGACCGGAGATGACAAGATCATCTTT;TRB:TGTGCCAGCACAGGACAGGGGGCCTACGAGCAGTACTTC	CAVTGDDKIIF	CASTGQGAYEQYF	TGTGCCGTGACCGGAGATGACAAGATCATCTTT	TGTGCCAGCACAGGACAGGGGGCCTACGAGCAGTACTTC	TRUE	TRUE	TRUE	TRUE	TRBV6-2	TRBJ2-7	TRAV12-2	TRAJ30	2,65E-06	0	0,666666667	0,666666667	1
clonotype101	6	0,001849568	TRA:CAVAGGKLIF;TRB:CASSDREVYGYTF	TRA:TGTGCCGTGGCGGGAGGAAAGCTTATCTTC;TRB:TGTGCCAGCAGTGACAGGGAGGTCTATGGCTACACCTTC	CAVAGGKLIF	CASSDREVYGYTF	TGTGCCGTGGCGGGAGGAAAGCTTATCTTC	TGTGCCAGCAGTGACAGGGAGGTCTATGGCTACACCTTC	TRUE	TRUE	TRUE	TRUE	TRBV6-1	TRBJ1-2	TRAV12-2	TRAJ23	1,32E-06	0	0	0,75	2
clonotype106	6	0,001849568	TRA:CATDGEGYQKVTF;TRB:CASTGGGAPYNEQFF	TRA:TGTGCTACGGACGGTGAGGGTTACCAGAAAGTTACCTTT;TRB:TGTGCCAGCACTGGGGGAGGTGCCCCCTACAATGAGCAGTTCTTC	CATDGEGYQKVTF	CASTGGGAPYNEQFF	TGTGCTACGGACGGTGAGGGTTACCAGAAAGTTACCTTT	TGTGCCAGCACTGGGGGAGGTGCCCCCTACAATGAGCAGTTCTTC	FALSE	FALSE	TRUE	TRUE	TRBV9	TRBJ2-1	TRAV17	TRAJ13	0	0	0,166666667	0,666666667	2
clonotype107	6	0,001849568	TRA:CAGAGLGNDMRF;TRB:CASSVGGAVYNEQFF	TRA:TGTGCAGGAGCGGGTCTTGGCAATGACATGCGCTTT;TRB:TGTGCCAGCAGCGTAGGGGGGGCTGTCTACAATGAGCAGTTCTTC	CAGAGLGNDMRF	CASSVGGAVYNEQFF	TGTGCAGGAGCGGGTCTTGGCAATGACATGCGCTTT	TGTGCCAGCAGCGTAGGGGGGGCTGTCTACAATGAGCAGTTCTTC	TRUE	TRUE	TRUE	TRUE	TRBV9	TRBJ2-1	TRAV27	TRAJ43	1,46E-05	0	0,333333333	0,666666667	2
clonotype104	6	0,001849568	TRA:CAVGDDKIIF;TRB:CASSSAGGYEQYV	TRA:TGTGCCGTGGGCGATGACAAGATCATCTTT;TRB:TGTGCCAGCAGTTCGGCGGGGGGCTACGAGCAGTACGTC	CAVGDDKIIF	CASSSAGGYEQYV	TGTGCCGTGGGCGATGACAAGATCATCTTT	TGTGCCAGCAGTTCGGCGGGGGGCTACGAGCAGTACGTC	TRUE	FALSE	TRUE	TRUE	TRBV6-2	TRBJ2-7	TRAV12-2	TRAJ30	0	0	0,333333333	0,5	2
clonotype105	6	0,001849568	TRA:CALSIYGGSQGNLIF;TRB:CASSLGQGASIEQYF	TRA:TGTGCTCTGAGCATCTATGGAGGAAGCCAAGGAAATCTCATCTTT;TRB:TGTGCCAGCAGCTTAGGACAGGGGGCGTCCATCGAGCAGTACTTC	CALSIYGGSQGNLIF	CASSLGQGASIEQYF	TGTGCTCTGAGCATCTATGGAGGAAGCCAAGGAAATCTCATCTTT	TGTGCCAGCAGCTTAGGACAGGGGGCGTCCATCGAGCAGTACTTC	FALSE	TRUE	TRUE	TRUE	TRBV13	TRBJ2-7	TRAV19	TRAJ42	3,97E-06	1,27E-06	0,5	0,833333333	2
clonotype125	6	0,001849568	TRA:CAVGTDKLIF;TRB:CASSYGTAYGYTF	TRA:TGTGCCGTGGGCACCGACAAGCTCATCTTT;TRB:TGTGCCAGCAGTTACGGGACAGCGTATGGCTACACCTTC	CAVGTDKLIF	CASSYGTAYGYTF	TGTGCCGTGGGCACCGACAAGCTCATCTTT	TGTGCCAGCAGTTACGGGACAGCGTATGGCTACACCTTC	TRUE	TRUE	TRUE	TRUE	TRBV6-2	TRBJ1-2	TRAV12-2	TRAJ34	1,32E-06	1,27E-06	0,666666667	0,833333333	1
clonotype115	6	0,001849568	TRA:CAVGDDKIIF;TRB:CASSDSHTGAYGYTF	TRA:TGTGCCGTAGGAGATGACAAGATCATCTTT;TRB:TGTGCCAGCAGTGACTCTCATACAGGGGCCTATGGCTACACCTTC	CAVGDDKIIF	CASSDSHTGAYGYTF	TGTGCCGTAGGAGATGACAAGATCATCTTT	TGTGCCAGCAGTGACTCTCATACAGGGGCCTATGGCTACACCTTC	TRUE	FALSE	TRUE	TRUE	TRBV6-4	TRBJ1-2	TRAV12-2	TRAJ30	0	0	0,333333333	0,333333333	2
clonotype114	6	0,001849568	TRA:CVVSPTDKLIF;TRB:CASSLGIYGYTF	TRA:TGTGTGGTGAGCCCCACCGACAAGCTCATCTTT;TRB:TGTGCCAGCAGTTTGGGAATCTATGGCTACACCTTC	CVVSPTDKLIF	CASSLGIYGYTF	TGTGTGGTGAGCCCCACCGACAAGCTCATCTTT	TGTGCCAGCAGTTTGGGAATCTATGGCTACACCTTC	TRUE	TRUE	TRUE	TRUE	TRBV28	TRBJ1-2	TRAV12-1	TRAJ34	2,65E-06	0	0,166666667	0,666666667	2
clonotype117	6	0,001849568	TRA:CAVSAGQFYF;TRB:CASSAGTGSYEQYF	TRA:TGTGCCGTGAGCGCGGGCCAGTTCTATTTT;TRB:TGTGCCAGCAGCGCAGGGACAGGGTCCTACGAGCAGTACTTC	CAVSAGQFYF	CASSAGTGSYEQYF	TGTGCCGTGAGCGCGGGCCAGTTCTATTTT	TGTGCCAGCAGCGCAGGGACAGGGTCCTACGAGCAGTACTTC	TRUE	TRUE	TRUE	TRUE	TRBV9	TRBJ2-7	TRAV12-2	TRAJ49	5,30E-05	7,64E-06	0,333333333	0,833333333	1
clonotype116	6	0,001849568	TRA:CATDGDNNARLMF;TRB:CASSRGGAPYNEQFF	TRA:TGTGCTACGGACGGGGATAACAATGCCAGACTCATGTTT;TRB:TGTGCCAGCAGCCGCGGCGGGGCACCCTACAATGAGCAGTTCTTC	CATDGDNNARLMF	CASSRGGAPYNEQFF	TGTGCTACGGACGGGGATAACAATGCCAGACTCATGTTT	TGTGCCAGCAGCCGCGGCGGGGCACCCTACAATGAGCAGTTCTTC	TRUE	TRUE	TRUE	TRUE	TRBV7-3	TRBJ2-1	TRAV17	TRAJ31	2,65E-06	0	0,5	0,333333333	1
clonotype111	6	0,001849568	TRA:CAVTGTYKYIF;TRB:CASSGQGAYEQYF	TRA:TGTGCCGTGACAGGAACCTACAAATACATCTTT;TRB:TGTGCCAGCAGTGGACAGGGGGCCTACGAGCAGTACTTC	CAVTGTYKYIF	CASSGQGAYEQYF	TGTGCCGTGACAGGAACCTACAAATACATCTTT	TGTGCCAGCAGTGGACAGGGGGCCTACGAGCAGTACTTC	TRUE	TRUE	TRUE	TRUE	TRBV6-3	TRBJ2-7	TRAV12-2	TRAJ40	5,30E-06	0	0,666666667	0,5	1
clonotype110	6	0,001849568	TRA:CAGARDTGNQFYF;TRB:CSAGLGLPYEQYF	TRA:TGTGCAGGAGCTCGCGACACCGGTAACCAGTTCTATTTT;TRB:TGCAGTGCCGGGTTGGGCCTCCCCTACGAGCAGTACTTC	CAGARDTGNQFYF	CSAGLGLPYEQYF	TGTGCAGGAGCTCGCGACACCGGTAACCAGTTCTATTTT	TGCAGTGCCGGGTTGGGCCTCCCCTACGAGCAGTACTTC	TRUE	TRUE	TRUE	TRUE	TRBV20-1	TRBJ2-7	TRAV27	TRAJ49	2,52E-05	2,55E-06	0,333333333	0,666666667	2
clonotype113	6	0,001849568	TRA:CAVNQPSF;TRB:CASSPGGEAYGYTF	TRA:TGTGCCGTGAATCAACCCAGCTTT;TRB:TGTGCCAGCAGCCCCGGAGGGGAAGCCTATGGCTACACCTTC	CAVNQPSF	CASSPGGEAYGYTF	TGTGCCGTGAATCAACCCAGCTTT	TGTGCCAGCAGCCCCGGAGGGGAAGCCTATGGCTACACCTTC	TRUE	TRUE	TRUE	TRUE	TRBV6-2	TRBJ1-2	TRAV12-2	TRAJ20	2,65E-06	0	0,333333333	0,333333333	2
clonotype112	6	0,001849568	TRA:CAVTDDKIIF;TRB:CASSQEGRGAFF	TRA:TGTGCCGTGACTGATGACAAGATCATCTTT;TRB:TGTGCCAGCAGCCAAGAAGGCCGGGGAGCTTTCTTT	CAVTDDKIIF	CASSQEGRGAFF	TGTGCCGTGACTGATGACAAGATCATCTTT	TGTGCCAGCAGCCAAGAAGGCCGGGGAGCTTTCTTT	TRUE	TRUE	TRUE	TRUE	TRBV4-2	TRBJ1-1	TRAV12-2	TRAJ30	6,62E-06	0	0,333333333	0,5	2
clonotype119	6	0,001849568	TRA:CAVTGDKIIF;TRB:CASSDGPSYEQYV	TRA:TGTGCCGTTACGGGGGACAAGATCATCTTT;TRB:TGTGCCAGCAGTGACGGTCCCTCCTACGAGCAGTACGTC	CAVTGDKIIF	CASSDGPSYEQYV	TGTGCCGTTACGGGGGACAAGATCATCTTT	TGTGCCAGCAGTGACGGTCCCTCCTACGAGCAGTACGTC	TRUE	TRUE	TRUE	TRUE	TRBV6-2	TRBJ2-7	TRAV12-2	TRAJ30	6,62E-06	0	0,5	0,666666667	1
clonotype118	6	0,001849568	TRA:CAVNGARLMF;TRB:CATSPSAGGYGYTF	TRA:TGTGCCGTGAACGGCGCCAGACTCATGTTT;TRB:TGTGCCACCAGCCCCTCAGCAGGGGGCTATGGCTACACCTTC	CAVNGARLMF	CATSPSAGGYGYTF	TGTGCCGTGAACGGCGCCAGACTCATGTTT	TGTGCCACCAGCCCCTCAGCAGGGGGCTATGGCTACACCTTC	FALSE	TRUE	TRUE	TRUE	TRBV15	TRBJ1-2	TRAV12-2	TRAJ31	2,65E-06	0	0,5	0,5	1
clonotype126	6	0,001849568	TRA:CAVTYGGSQGNLIF;TRB:CASSQALAYEQYF	TRA:TGTGCCGTGACGTATGGAGGAAGCCAAGGAAATCTCATCTTT;TRB:TGTGCCAGCAGCCAAGCTCTAGCATACGAGCAGTACTTC	CAVTYGGSQGNLIF	CASSQALAYEQYF	TGTGCCGTGACGTATGGAGGAAGCCAAGGAAATCTCATCTTT	TGTGCCAGCAGCCAAGCTCTAGCATACGAGCAGTACTTC	FALSE	FALSE	TRUE	TRUE	TRBV4-2	TRBJ2-7	TRAV8-1	TRAJ42	0	0	0,333333333	0,833333333	2
clonotype120	6	0,001849568	TRA:CAVTDYQLTF;TRB:CASSSSGTGGYGYTF	TRA:TGTGCCGTGACCGATTACCAACTCACTTTC;TRB:TGTGCCAGCAGTTCGTCCGGGACAGGGGGCTATGGCTACACCTTC	CAVTDYQLTF	CASSSSGTGGYGYTF	TGTGCCGTGACCGATTACCAACTCACTTTC	TGTGCCAGCAGTTCGTCCGGGACAGGGGGCTATGGCTACACCTTC	TRUE	FALSE	TRUE	TRUE	TRBV6-2	TRBJ1-2	TRAV12-2	TRAJ28	0	0	0,166666667	0,666666667	2
clonotype121	6	0,001849568	TRA:CATDLQGAQKLVF;TRB:CASSVGGVGYNEQFF	TRA:TGTGCTACGGACCTTCAGGGAGCCCAGAAGCTGGTATTT;TRB:TGTGCCAGCAGCGTCGGAGGGGTGGGATACAATGAGCAGTTCTTC	CATDLQGAQKLVF	CASSVGGVGYNEQFF	TGTGCTACGGACCTTCAGGGAGCCCAGAAGCTGGTATTT	TGTGCCAGCAGCGTCGGAGGGGTGGGATACAATGAGCAGTTCTTC	FALSE	TRUE	TRUE	TRUE	TRBV9	TRBJ2-1	TRAV17	TRAJ54	1,32E-06	0	0	0,4	2
clonotype123	6	0,001849568	TRA:CAVTGNQFYF;TRB:CASSAGTGAYEQYF	TRA:TGTGCCGTTACCGGTAACCAGTTCTATTTT;TRB:TGTGCCAGCAGCGCCGGGACAGGGGCCTACGAGCAGTACTTC	CAVTGNQFYF	CASSAGTGAYEQYF	TGTGCCGTTACCGGTAACCAGTTCTATTTT	TGTGCCAGCAGCGCCGGGACAGGGGCCTACGAGCAGTACTTC	TRUE	FALSE	TRUE	TRUE	TRBV9	TRBJ2-7	TRAV12-2	TRAJ49	0	0	0,4	0,4	2
clonotype137	5	0,001541307	TRA:CAVNNNDMRF;TRB:CATSSGTAYEQYF	TRA:TGTGCCGTGAATAACAATGACATGCGCTTT;TRB:TGTGCCACCAGCAGTGGGACAGCCTACGAGCAGTACTTC	CAVNNNDMRF	CATSSGTAYEQYF	TGTGCCGTGAATAACAATGACATGCGCTTT	TGTGCCACCAGCAGTGGGACAGCCTACGAGCAGTACTTC	TRUE	TRUE	TRUE	TRUE	TRBV15	TRBJ2-7	TRAV12-2	TRAJ43	1,32E-05	1,27E-06	0,4	0,8	2
clonotype136	5	0,001541307	TRA:CAVNRDARLMF;TRB:CSVNRGIGNTEAFF	TRA:TGTGCCGTGAACAGGGATGCCAGACTCATGTTT;TRB:TGCAGCGTAAACAGGGGGATAGGGAACACTGAAGCTTTCTTT	CAVNRDARLMF	CSVNRGIGNTEAFF	TGTGCCGTGAACAGGGATGCCAGACTCATGTTT	TGCAGCGTAAACAGGGGGATAGGGAACACTGAAGCTTTCTTT	TRUE	TRUE	TRUE	TRUE	TRBV29-1	TRBJ1-1	TRAV12-2	TRAJ31	1,32E-06	0	0,6	0,6	1
clonotype135	5	0,001541307	TRA:CAFLDDKIIF;TRB:CASSLGGAGSQPQHF	TRA:TGTGCCTTTCTAGATGACAAGATCATCTTT;TRB:TGTGCCAGCAGTTTGGGGGGGGCTGGAAGTCAGCCCCAGCATTTT	CAFLDDKIIF	CASSLGGAGSQPQHF	TGTGCCTTTCTAGATGACAAGATCATCTTT	TGTGCCAGCAGTTTGGGGGGGGCTGGAAGTCAGCCCCAGCATTTT	TRUE	TRUE	TRUE	TRUE	TRBV27	TRBJ1-5	TRAV12-2	TRAJ30	2,52E-05	3,82E-06	1	0,8	1
clonotype134	5	0,001541307	TRA:CAVNWDDKIIF;TRB:CATSRGQGYEQYF	TRA:TGTGCCGTGAATTGGGATGACAAGATCATCTTT;TRB:TGTGCCACCAGCAGAGGACAGGGGTACGAGCAGTACTTC	CAVNWDDKIIF	CATSRGQGYEQYF	TGTGCCGTGAATTGGGATGACAAGATCATCTTT	TGTGCCACCAGCAGAGGACAGGGGTACGAGCAGTACTTC	FALSE	TRUE	TRUE	TRUE	TRBV15	TRBJ2-7	TRAV12-2	TRAJ30	5,30E-06	0	0	0,25	2
clonotype133	5	0,001541307	TRA:CAVNGETDSWGKLQF;TRB:CASSQQGSHEQYV	TRA:TGTGCCGTGAACGGGGAGACTGACAGCTGGGGGAAATTGCAGTTT;TRB:TGTGCCAGCAGTCAACAGGGGAGCCACGAGCAGTACGTC	CAVNGETDSWGKLQF	CASSQQGSHEQYV	TGTGCCGTGAACGGGGAGACTGACAGCTGGGGGAAATTGCAGTTT	TGTGCCAGCAGTCAACAGGGGAGCCACGAGCAGTACGTC	TRUE	TRUE	TRUE	TRUE	TRBV6-1	TRBJ2-7	TRAV12-2	TRAJ24	2,65E-06	0	0,6	0,8	1
clonotype132	5	0,001541307	TRA:CAVIFSGGYQKVTF;TRB:CASSVGGVSYNEQFF	TRA:TGTGCCGTGATTTTTTCTGGGGGTTACCAGAAAGTTACCTTT;TRB:TGTGCCAGCAGCGTAGGTGGGGTCTCCTACAATGAGCAGTTCTTC	CAVIFSGGYQKVTF	CASSVGGVSYNEQFF	TGTGCCGTGATTTTTTCTGGGGGTTACCAGAAAGTTACCTTT	TGTGCCAGCAGCGTAGGTGGGGTCTCCTACAATGAGCAGTTCTTC	TRUE	TRUE	TRUE	TRUE	TRBV9	TRBJ2-1	TRAV27	TRAJ13	1,85E-05	5,09E-06	0,2	0,2	2
clonotype131	5	0,001541307	TRA:CAVNINTDKLIF;TRB:CASSGAGGYEQYF	TRA:TGTGCCGTGAACATCAACACCGACAAGCTCATCTTT;TRB:TGCGCCAGCAGCGGGGCGGGGGGGTACGAGCAGTACTTC	CAVNINTDKLIF	CASSGAGGYEQYF	TGTGCCGTGAACATCAACACCGACAAGCTCATCTTT	TGCGCCAGCAGCGGGGCGGGGGGGTACGAGCAGTACTTC	TRUE	TRUE	TRUE	TRUE	TRBV5-1	TRBJ2-7	TRAV12-2	TRAJ34	4,11E-05	0	0,6	0,8	1
clonotype130	5	0,001541307	TRA:CVADSWGKLQF;TRB:CASSIPAGGAYGYTF	TRA:TGTGTGGCCGACAGCTGGGGGAAATTGCAGTTT;TRB:TGTGCCAGTAGTATTCCTGCCGGGGGCGCCTATGGCTACACCTTC	CVADSWGKLQF	CASSIPAGGAYGYTF	TGTGTGGCCGACAGCTGGGGGAAATTGCAGTTT	TGTGCCAGTAGTATTCCTGCCGGGGGCGCCTATGGCTACACCTTC	TRUE	TRUE	TRUE	TRUE	TRBV19	TRBJ1-2	TRAV12-1	TRAJ24	2,65E-06	0	0,2	0,8	2
clonotype128	5	0,001541307	TRA:CAATHSTLTF;TRB:CSASMEAASTYEQYF	TRA:TGTGCAGCAACTCACAGCACCCTCACCTTT;TRB:TGCAGTGCTTCGATGGAGGCAGCCAGCACTTACGAGCAGTACTTC	CAATHSTLTF	CSASMEAASTYEQYF	TGTGCAGCAACTCACAGCACCCTCACCTTT	TGCAGTGCTTCGATGGAGGCAGCCAGCACTTACGAGCAGTACTTC	TRUE	TRUE	TRUE	TRUE	TRBV20-1	TRBJ2-7	TRAV13-1	TRAJ11	9,27E-06	1,27E-06	0	0,2	2
clonotype129	5	0,001541307	TRA:CAVTSDKLIF;TRB:CASSAASGGAYEQYF	TRA:TGTGCCGTGACATCAGACAAGCTCATCTTT;TRB:TGTGCCAGCAGCGCGGCTAGCGGGGGGGCGTACGAGCAGTACTTC	CAVTSDKLIF	CASSAASGGAYEQYF	TGTGCCGTGACATCAGACAAGCTCATCTTT	TGTGCCAGCAGCGCGGCTAGCGGGGGGGCGTACGAGCAGTACTTC	TRUE	TRUE	TRUE	TRUE	TRBV9	TRBJ2-7	TRAV12-2	TRAJ34	1,85E-05	2,55E-06	0,4	0,2	2
clonotype127	5	0,001541307	TRA:CAANNARLMF;TRB:CASSSRIEGTEAFF	TRA:TGTGCCGCCAACAATGCCAGACTCATGTTT;TRB:TGTGCCAGCAGCTCTCGGATAGAAGGCACTGAAGCTTTCTTT	CAANNARLMF	CASSSRIEGTEAFF	TGTGCCGCCAACAATGCCAGACTCATGTTT	TGTGCCAGCAGCTCTCGGATAGAAGGCACTGAAGCTTTCTTT	FALSE	TRUE	TRUE	TRUE	TRBV7-8	TRBJ1-1	TRAV12-2	TRAJ31	2,65E-06	0	0	0,4	2
clonotype146	4	0,001233046	TRA:CATDARGNEKLTF;TRB:CASSLGGIPVNEQFF	TRA:TGTGCTACGGACGCGAGGGGAAATGAGAAATTAACCTTT;TRB:TGTGCCAGCAGCCTAGGAGGGATCCCTGTCAATGAGCAGTTCTTC	CATDARGNEKLTF	CASSLGGIPVNEQFF	TGTGCTACGGACGCGAGGGGAAATGAGAAATTAACCTTT	TGTGCCAGCAGCCTAGGAGGGATCCCTGTCAATGAGCAGTTCTTC	TRUE	TRUE	TRUE	TRUE	TRBV9	TRBJ2-1	TRAV17	TRAJ48	3,05E-05	1,27E-06	1	1	1
clonotype147	4	0,001233046	TRA:CAVGDDKIIF;TRB:CASGTSGAYEQYF	TRA:TGTGCCGTGGGAGATGACAAGATCATCTTT;TRB:TGTGCCTCTGGGACTAGCGGGGCCTACGAGCAGTACTTC	CAVGDDKIIF	CASGTSGAYEQYF	TGTGCCGTGGGAGATGACAAGATCATCTTT	TGTGCCTCTGGGACTAGCGGGGCCTACGAGCAGTACTTC	TRUE	TRUE	TRUE	TRUE	TRBV19	TRBJ2-7	TRAV12-2	TRAJ30	1,32E-06	0	0	0,5	2
clonotype144	4	0,001233046	TRA:CAVIDDKIIF;TRB:CASSYTEAYEQYF	TRA:TGTGCCGTGATAGATGACAAGATCATCTTT;TRB:TGTGCCAGCAGTTACACGGAAGCCTACGAGCAGTACTTC	CAVIDDKIIF	CASSYTEAYEQYF	TGTGCCGTGATAGATGACAAGATCATCTTT	TGTGCCAGCAGTTACACGGAAGCCTACGAGCAGTACTTC	TRUE	FALSE	TRUE	TRUE	TRBV6-2	TRBJ2-7	TRAV12-2	TRAJ30	0	0	0,75	0,5	1
clonotype145	4	0,001233046	TRA:CLVGAPIEEDSNYQLIW;TRB:CASRILAGVLYEQYF	TRA:TGCCTCGTGGGTGCCCCGATAGAAGAGGATAGCAACTATCAGTTAATCTGG;TRB:TGTGCCAGCAGGATACTAGCGGGGGTTCTCTACGAGCAGTACTTC	CLVGAPIEEDSNYQLIW	CASRILAGVLYEQYF	TGCCTCGTGGGTGCCCCGATAGAAGAGGATAGCAACTATCAGTTAATCTGG	TGTGCCAGCAGGATACTAGCGGGGGTTCTCTACGAGCAGTACTTC	TRUE	TRUE	TRUE	TRUE	TRBV2	TRBJ2-7	TRAV4	TRAJ33	2,91E-05	3,82E-06	1	0,75	1
clonotype142	4	0,001233046	TRA:CAVNRASDSWGKLQF;TRB:CASSEPGHHEQYF	TRA:TGTGCCGTGAACAGGGCGTCTGACAGCTGGGGGAAATTGCAGTTT;TRB:TGTGCCAGCAGCGAGCCGGGACACCACGAGCAGTACTTC	CAVNRASDSWGKLQF	CASSEPGHHEQYF	TGTGCCGTGAACAGGGCGTCTGACAGCTGGGGGAAATTGCAGTTT	TGTGCCAGCAGCGAGCCGGGACACCACGAGCAGTACTTC	TRUE	TRUE	TRUE	TRUE	TRBV6-1	TRBJ2-7	TRAV12-2	TRAJ24	2,65E-06	0	1	0	1
clonotype143	4	0,001233046	TRA:CALRGFMNSGGYQKVTF;TRB:CASSIGLGGTSEQFF	TRA:TGTGCTCTAAGGGGTTTCATGAATTCTGGGGGTTACCAGAAAGTTACCTTT;TRB:TGTGCCAGCAGCATAGGACTAGGAGGCACAAGTGAGCAGTTCTTC	CALRGFMNSGGYQKVTF	CASSIGLGGTSEQFF	TGTGCTCTAAGGGGTTTCATGAATTCTGGGGGTTACCAGAAAGTTACCTTT	TGTGCCAGCAGCATAGGACTAGGAGGCACAAGTGAGCAGTTCTTC	TRUE	TRUE	TRUE	TRUE	TRBV5-4	TRBJ2-1	TRAV16	TRAJ13	4,77E-05	1,15E-05	0,75	0,25	1
clonotype141	4	0,001233046	TRA:CAVNEDGQKLLF;TRB:CASSYSGTSGGAYEQYF	TRA:TGTGCCGTGAACGAGGATGGCCAGAAGCTGCTCTTT;TRB:TGTGCCAGCAGTTACTCCGGGACTAGCGGGGGGGCTTACGAGCAGTACTTC	CAVNEDGQKLLF	CASSYSGTSGGAYEQYF	TGTGCCGTGAACGAGGATGGCCAGAAGCTGCTCTTT	TGTGCCAGCAGTTACTCCGGGACTAGCGGGGGGGCTTACGAGCAGTACTTC	TRUE	FALSE	TRUE	TRUE	TRBV6-5	TRBJ2-7	TRAV12-2	TRAJ16	0	0	1	0,75	1
clonotype159	4	0,001233046	TRA:CAVSDDKIIF;TRB:CASSEEGLAGTGELFF	TRA:TGTGCCGTGAGTGATGACAAGATCATCTTT;TRB:TGTGCCAGCAGTGAAGAGGGTCTAGCGGGGACCGGGGAGCTGTTTTTT	CAVSDDKIIF	CASSEEGLAGTGELFF	TGTGCCGTGAGTGATGACAAGATCATCTTT	TGTGCCAGCAGTGAAGAGGGTCTAGCGGGGACCGGGGAGCTGTTTTTT	TRUE	TRUE	TRUE	TRUE	TRBV6-1	TRBJ2-2	TRAV12-2	TRAJ30	1,32E-06	0	0,75	0,75	2
clonotype158	4	0,001233046	TRA:CAGLRVQGAQKLVF;TRB:CASSLGPYEQYF	TRA:TGTGCAGGACTAAGGGTCCAGGGAGCCCAGAAGCTGGTATTT;TRB:TGTGCCAGCAGCTTAGGGCCGTACGAGCAGTACTTC	CAGLRVQGAQKLVF	CASSLGPYEQYF	TGTGCAGGACTAAGGGTCCAGGGAGCCCAGAAGCTGGTATTT	TGTGCCAGCAGCTTAGGGCCGTACGAGCAGTACTTC	FALSE	FALSE	TRUE	TRUE	0	0	TRAV27	TRAJ54	0	0	0	0,75	2
clonotype151	4	0,001233046	TRA:CAGDNAGNMLTF;TRB:CASSDYNEQFF	TRA:TGTGCCGGGGATAATGCAGGCAACATGCTCACCTTT;TRB:TGTGCCAGCAGCGACTACAATGAGCAGTTCTTC	CAGDNAGNMLTF	CASSDYNEQFF	TGTGCCGGGGATAATGCAGGCAACATGCTCACCTTT	TGTGCCAGCAGCGACTACAATGAGCAGTTCTTC	TRUE	FALSE	TRUE	TRUE	TRBV9	TRBJ2-1	TRAV12-2	TRAJ39	0	0	0	0,75	2
clonotype152	4	0,001233046	TRA:CAVTDDKIIF;TRB:CASSHLAGGAGEQFF	TRA:TGTGCCGTGACTGACGACAAGATCATCTTT;TRB:TGCGCCAGCAGCCATCTCGCCGGGGGGGCGGGTGAGCAGTTCTTC	CAVTDDKIIF	CASSHLAGGAGEQFF	TGTGCCGTGACTGACGACAAGATCATCTTT	TGCGCCAGCAGCCATCTCGCCGGGGGGGCGGGTGAGCAGTTCTTC	FALSE	FALSE	TRUE	TRUE	TRBV4-1	TRBJ2-1	TRAV12-2	TRAJ30	0	0	0	0,25	2
clonotype155	4	0,001233046	TRA:CVVGRDQIIF;TRB:CASSGGGGGAYEQYF	TRA:TGTGTGGTGGGGAGGGATCAGATCATCTTT;TRB:TGTGCCAGCAGCGGAGGGGGCGGGGGGGCCTACGAGCAGTACTTC	CVVGRDQIIF	CASSGGGGGAYEQYF	TGTGTGGTGGGGAGGGATCAGATCATCTTT	TGTGCCAGCAGCGGAGGGGGCGGGGGGGCCTACGAGCAGTACTTC	TRUE	FALSE	TRUE	TRUE	TRBV6-1	TRBJ2-7	TRAV12-1	TRAJ30	0	0	0	0,25	2
clonotype154	4	0,001233046	TRA:CAVSDDKIIF;TRB:CASSVSGGAYEQYF	TRA:TGTGCCGTGTCAGATGACAAGATCATCTTT;TRB:TGTGCCAGCAGCGTAAGCGGGGGAGCTTACGAGCAGTACTTC	CAVSDDKIIF	CASSVSGGAYEQYF	TGTGCCGTGTCAGATGACAAGATCATCTTT	TGTGCCAGCAGCGTAAGCGGGGGAGCTTACGAGCAGTACTTC	TRUE	TRUE	TRUE	TRUE	TRBV9	TRBJ2-7	TRAV12-2	TRAJ30	7,95E-06	0	0,75	1	1
clonotype157	4	0,001233046	TRA:CAVSPDNYGQNFVF;TRB:CASSQTGSHEQYF	TRA:TGTGCTGTGAGCCCTGATAACTATGGTCAGAATTTTGTCTTT;TRB:TGTGCCAGCAGCCAGACAGGGTCCCACGAGCAGTACTTC	CAVSPDNYGQNFVF	CASSQTGSHEQYF	TGTGCTGTGAGCCCTGATAACTATGGTCAGAATTTTGTCTTT	TGTGCCAGCAGCCAGACAGGGTCCCACGAGCAGTACTTC	TRUE	TRUE	TRUE	TRUE	TRBV11-2	TRBJ2-7	TRAV22	TRAJ26	2,65E-06	1,27E-06	1	1	1
clonotype156	4	0,001233046	TRA:CAVSTDKLIF;TRB:CSVDRRSDEAFF	TRA:TGTGCCGTGAGCACCGACAAGCTCATCTTT;TRB:TGCAGCGTTGACAGGAGGTCTGATGAAGCTTTCTTT	CAVSTDKLIF	CSVDRRSDEAFF	TGTGCCGTGAGCACCGACAAGCTCATCTTT	TGCAGCGTTGACAGGAGGTCTGATGAAGCTTTCTTT	TRUE	TRUE	TRUE	TRUE	TRBV29-1	TRBJ1-1	TRAV12-2	TRAJ34	5,30E-06	0	0,25	0,75	2
clonotype161	4	0,001233046	TRA:CAVTSDDMRF;TRB:CASSVGLEAYEQYF	TRA:TGTGCCGTGACCAGCGATGACATGCGCTTT;TRB:TGTGCCAGCAGCGTAGGCCTGGAGGCCTACGAGCAGTACTTC	CAVTSDDMRF	CASSVGLEAYEQYF	TGTGCCGTGACCAGCGATGACATGCGCTTT	TGTGCCAGCAGCGTAGGCCTGGAGGCCTACGAGCAGTACTTC	TRUE	TRUE	TRUE	TRUE	TRBV9	TRBJ2-7	TRAV12-2	TRAJ43	2,12E-05	1,27E-06	1	0,5	1
clonotype163	4	0,001233046	TRA:CAMRDPGGGADGLTF;TRB:CAISVEGTGLGYGYTF	TRA:TGTGCAATGAGAGACCCAGGAGGAGGTGCTGACGGACTCACCTTT;TRB:TGTGCCATCAGTGTCGAGGGGACAGGCCTGGGATATGGCTACACCTTC	CAMRDPGGGADGLTF	CAISVEGTGLGYGYTF	TGTGCAATGAGAGACCCAGGAGGAGGTGCTGACGGACTCACCTTT	TGTGCCATCAGTGTCGAGGGGACAGGCCTGGGATATGGCTACACCTTC	TRUE	TRUE	TRUE	TRUE	TRBV10-3	TRBJ1-2	TRAV14DV4	TRAJ45	5,30E-06	1,27E-06	0,25	0,75	2
clonotype164	4	0,001233046	TRA:CAVPSGGYQKVTF;TRB:CASTLSGGAVFEQYF	TRA:TGTGCCGTTCCTTCTGGGGGTTACCAGAAAGTTACCTTT;TRB:TGTGCCAGCACCCTTAGCGGGGGGGCCGTCTTCGAGCAGTACTTC	CAVPSGGYQKVTF	CASTLSGGAVFEQYF	TGTGCCGTTCCTTCTGGGGGTTACCAGAAAGTTACCTTT	TGTGCCAGCACCCTTAGCGGGGGGGCCGTCTTCGAGCAGTACTTC	FALSE	FALSE	TRUE	TRUE	TRBV13	TRBJ2-7	TRAV12-2	TRAJ13	0	0	0	0,75	2
clonotype165	4	0,001233046	TRA:CATDASHNTDKLIF;TRB:CASSRGRNTEAFF	TRA:TGTGCTACGGACGCGTCACATAACACCGACAAGCTCATCTTT;TRB:TGTGCCAGCAGCCGAGGCCGGAACACTGAAGCTTTCTTT	CATDASHNTDKLIF	CASSRGRNTEAFF	TGTGCTACGGACGCGTCACATAACACCGACAAGCTCATCTTT	TGTGCCAGCAGCCGAGGCCGGAACACTGAAGCTTTCTTT	TRUE	TRUE	TRUE	TRUE	TRBV13	TRBJ1-1	TRAV17	TRAJ34	1,06E-05	0	0,5	0,5	1
clonotype166	4	0,001233046	TRA:CAVRDDKIIF;TRB:CASSQEGSAGLETQYF	TRA:TGTGCCGTGAGGGATGACAAGATCATCTTT;TRB:TGTGCCAGCAGCCAAGAAGGTTCCGCGGGGTTGGAGACCCAGTACTTC	CAVRDDKIIF	CASSQEGSAGLETQYF	TGTGCCGTGAGGGATGACAAGATCATCTTT	TGTGCCAGCAGCCAAGAAGGTTCCGCGGGGTTGGAGACCCAGTACTTC	TRUE	TRUE	TRUE	TRUE	TRBV4-2	TRBJ2-5	TRAV12-2	TRAJ30	1,46E-05	1,27E-06	0,333333333	0,666666667	2
clonotype173	3	0,000924784	TRA:CAGAGTNAGKSTF;TRB:CASSVGGVPYNEQFF	TRA:TGTGCAGGAGCAGGAACCAATGCAGGCAAATCAACCTTT;TRB:TGTGCCAGCAGCGTAGGGGGTGTCCCTTACAATGAGCAGTTCTTC	CAGAGTNAGKSTF	CASSVGGVPYNEQFF	TGTGCAGGAGCAGGAACCAATGCAGGCAAATCAACCTTT	TGTGCCAGCAGCGTAGGGGGTGTCCCTTACAATGAGCAGTTCTTC	FALSE	FALSE	TRUE	TRUE	0	0	0	0	0	0	0	1	2
clonotype172	3	0,000924784	TRA:CALSEADGQNFVF;TRB:CASSLERGPYYEQYF	TRA:TGTGCTCTGAGTGAGGCGGATGGTCAGAATTTTGTCTTT;TRB:TGTGCCAGCAGCTTAGAGCGGGGGCCATACTACGAGCAGTACTTC	CALSEADGQNFVF	CASSLERGPYYEQYF	TGTGCTCTGAGTGAGGCGGATGGTCAGAATTTTGTCTTT	TGTGCCAGCAGCTTAGAGCGGGGGCCATACTACGAGCAGTACTTC	TRUE	TRUE	TRUE	TRUE	TRBV7-6	TRBJ2-7	TRAV19	TRAJ26	2,38E-05	0	0,666666667	0,666666667	1
clonotype177	3	0,000924784	TRA:CAGAEVMDARLMF;TRB:CASSVGGTGYNEQFF	TRA:TGTGCAGGAGCTGAGGTAATGGATGCCAGACTCATGTTT;TRB:TGTGCCAGCAGCGTTGGGGGGACAGGGTACAATGAGCAGTTCTTC	CAGAEVMDARLMF	CASSVGGTGYNEQFF	TGTGCAGGAGCTGAGGTAATGGATGCCAGACTCATGTTT	TGTGCCAGCAGCGTTGGGGGGACAGGGTACAATGAGCAGTTCTTC	TRUE	TRUE	TRUE	TRUE	TRBV9	TRBJ2-1	TRAV27	TRAJ31	1,32E-06	0	1	0,666666667	1
clonotype174	3	0,000924784	TRA:CAVTTDKLIF;TRB:CASSSGLAYEQYF	TRA:TGTGCCGTGACGACCGACAAGCTCATCTTT;TRB:TGTGCCAGCAGTTCGGGACTAGCCTACGAGCAGTACTTC	CAVTTDKLIF	CASSSGLAYEQYF	TGTGCCGTGACGACCGACAAGCTCATCTTT	TGTGCCAGCAGTTCGGGACTAGCCTACGAGCAGTACTTC	TRUE	TRUE	TRUE	TRUE	TRBV6-2	TRBJ2-7	TRAV12-2	TRAJ34	3,97E-06	0	0,666666667	0,666666667	2
clonotype179	3	0,000924784	TRA:CAVGDDKIIF;TRB:CASSPGQGYEQYF	TRA:TGTGCCGTCGGAGATGACAAGATCATCTTT;TRB:TGTGCCAGCAGTCCCGGACAGGGCTACGAGCAGTACTTC	CAVGDDKIIF	CASSPGQGYEQYF	TGTGCCGTCGGAGATGACAAGATCATCTTT	TGTGCCAGCAGTCCCGGACAGGGCTACGAGCAGTACTTC	TRUE	FALSE	TRUE	TRUE	TRBV6-4	TRBJ2-7	0	0	0	0	0,333333333	0,333333333	2
clonotype178	3	0,000924784	TRA:CAVGDDKIIF;TRB:CAISAGEGYEQYF	TRA:TGTGCCGTGGGAGATGACAAGATCATCTTT;TRB:TGTGCCATCAGTGCGGGGGAAGGCTACGAGCAGTACTTC	CAVGDDKIIF	CAISAGEGYEQYF	TGTGCCGTGGGAGATGACAAGATCATCTTT	TGTGCCATCAGTGCGGGGGAAGGCTACGAGCAGTACTTC	TRUE	TRUE	TRUE	TRUE	0	0	TRAV12-2	TRAJ30	2,65E-06	1,27E-06	0	0	2
clonotype182	3	0,000924784	TRA:CAVKDDKIIF;TRB:CASSPESSGGDNEQFF	TRA:TGTGCCGTGAAAGATGACAAGATCATCTTT;TRB:TGTGCCAGCAGCCCGGAATCTAGCGGGGGGGACAATGAGCAGTTCTTC	CAVKDDKIIF	CASSPESSGGDNEQFF	TGTGCCGTGAAAGATGACAAGATCATCTTT	TGTGCCAGCAGCCCGGAATCTAGCGGGGGGGACAATGAGCAGTTCTTC	TRUE	TRUE	TRUE	TRUE	TRBV4-2	TRBJ2-1	TRAV12-2	TRAJ30	1,06E-05	1,27E-06	0,666666667	0,666666667	1
clonotype183	3	0,000924784	TRA:CVVNKDNFNKFYF;TRB:CASRPQQGKGSYEQYF	TRA:TGTGTGGTGAACAAGGACAACTTCAACAAATTTTACTTT;TRB:TGTGCCAGCAGACCACAACAGGGGAAGGGGTCCTACGAGCAGTACTTC	CVVNKDNFNKFYF	CASRPQQGKGSYEQYF	TGTGTGGTGAACAAGGACAACTTCAACAAATTTTACTTT	TGTGCCAGCAGACCACAACAGGGGAAGGGGTCCTACGAGCAGTACTTC	TRUE	TRUE	TRUE	TRUE	TRBV14	TRBJ2-7	TRAV12-1	TRAJ21	2,65E-06	1,27E-06	0,666666667	0,333333333	2
clonotype181	3	0,000924784	TRA:CAVQDDKIIF;TRB:CSAGEGEGQPQHF	TRA:TGTGCCGTTCAGGATGACAAGATCATCTTT;TRB:TGCAGTGCTGGGGAGGGCGAGGGCCAGCCCCAGCATTTT	CAVQDDKIIF	CSAGEGEGQPQHF	TGTGCCGTTCAGGATGACAAGATCATCTTT	TGCAGTGCTGGGGAGGGCGAGGGCCAGCCCCAGCATTTT	TRUE	TRUE	TRUE	TRUE	TRBV20-1	TRBJ1-5	TRAV12-2	TRAJ30	2,65E-06	0	0,333333333	0,666666667	2
clonotype187	3	0,000924784	TRA:CAGVWNTGNQFYF;TRB:CASSAGTPYNEQFF	TRA:TGTGCAGGAGTATGGAACACCGGTAACCAGTTCTATTTT;TRB:TGTGCCAGCAGCGCCGGGACCCCCTACAATGAGCAGTTCTTC	CAGVWNTGNQFYF	CASSAGTPYNEQFF	TGTGCAGGAGTATGGAACACCGGTAACCAGTTCTATTTT	TGTGCCAGCAGCGCCGGGACCCCCTACAATGAGCAGTTCTTC	TRUE	TRUE	TRUE	TRUE	TRBV9	TRBJ2-1	TRAV27	TRAJ49	9,27E-06	7,64E-06	1	0,333333333	1
clonotype184	3	0,000924784	TRA:CAVTGNQFYF;TRB:CASSVAAGASYGYTF	TRA:TGTGCCGTCACCGGTAACCAGTTCTATTTT;TRB:TGTGCCAGCAGCGTAGCCGCAGGGGCGAGCTATGGCTACACCTTC	CAVTGNQFYF	CASSVAAGASYGYTF	TGTGCCGTCACCGGTAACCAGTTCTATTTT	TGTGCCAGCAGCGTAGCCGCAGGGGCGAGCTATGGCTACACCTTC	TRUE	TRUE	TRUE	TRUE	TRBV9	TRBJ1-2	TRAV12-2	TRAJ49	1,32E-06	0	0,666666667	0,666666667	2
clonotype185	3	0,000924784	TRA:CLVGAPMFSGGYNKLIF;TRB:CASKPGQDYTGELFF	TRA:TGCCTCGTGGGTGCTCCTATGTTTTCTGGTGGCTACAATAAGCTGATTTTT;TRB:TGTGCCAGCAAGCCGGGACAGGACTACACCGGGGAGCTGTTTTTT	CLVGAPMFSGGYNKLIF	CASKPGQDYTGELFF	TGCCTCGTGGGTGCTCCTATGTTTTCTGGTGGCTACAATAAGCTGATTTTT	TGTGCCAGCAAGCCGGGACAGGACTACACCGGGGAGCTGTTTTTT	TRUE	TRUE	TRUE	TRUE	TRBV6-1	TRBJ2-2	TRAV4	TRAJ4	0	0	0	0,333333333	2
clonotype188	3	0,000924784	TRA:CAMSGHGANNLFF;TRB:CASSEGGVPYNEQFF	TRA:TGTGCAATGAGCGGCCATGGGGCAAACAACCTCTTCTTT;TRB:TGTGCCAGCAGCGAGGGGGGGGTCCCCTACAATGAGCAGTTCTTC	CAMSGHGANNLFF	CASSEGGVPYNEQFF	TGTGCAATGAGCGGCCATGGGGCAAACAACCTCTTCTTT	TGTGCCAGCAGCGAGGGGGGGGTCCCCTACAATGAGCAGTTCTTC	TRUE	TRUE	TRUE	TRUE	TRBV9	TRBJ2-1	TRAV14DV4	TRAJ36	1,32E-05	0	0	1	2
clonotype189	3	0,000924784	TRA:CAVIHDKLIF;TRB:CSANRGATEAFF	TRA:TGTGCCGTGATTCACGACAAGCTCATCTTT;TRB:TGCAGTGCCAACAGGGGAGCCACTGAAGCTTTCTTT	CAVIHDKLIF	CSANRGATEAFF	TGTGCCGTGATTCACGACAAGCTCATCTTT	TGCAGTGCCAACAGGGGAGCCACTGAAGCTTTCTTT	TRUE	TRUE	TRUE	TRUE	TRBV20-1	TRBJ1-1	TRAV12-2	TRAJ34	1,32E-06	0	0	0,333333333	2
clonotype201	3	0,000924784	TRA:CAVNPPTDSWGKLQF;TRB:CASRGQGNTEAFF	TRA:TGTGCCGTGAACCCCCCAACTGACAGCTGGGGGAAATTGCAGTTT;TRB:TGTGCCAGCAGGGGACAGGGGAACACTGAAGCTTTCTTT	CAVNPPTDSWGKLQF	CASRGQGNTEAFF	TGTGCCGTGAACCCCCCAACTGACAGCTGGGGGAAATTGCAGTTT	TGTGCCAGCAGGGGACAGGGGAACACTGAAGCTTTCTTT	TRUE	TRUE	TRUE	TRUE	TRBV6-1	TRBJ1-1	TRAV12-2	TRAJ24	7,95E-06	1,27E-06	0	0,666666667	2
clonotype203	3	0,000924784	TRA:CAVSGYALNF;TRB:CASGAQAGTGAYGYTF	TRA:TGTGCCGTCTCCGGGTATGCACTCAACTTC;TRB:TGTGCCAGCGGAGCTCAAGCCGGGACAGGGGCCTATGGCTACACCTTC	CAVSGYALNF	CASGAQAGTGAYGYTF	TGTGCCGTCTCCGGGTATGCACTCAACTTC	TGTGCCAGCGGAGCTCAAGCCGGGACAGGGGCCTATGGCTACACCTTC	TRUE	FALSE	TRUE	TRUE	TRBV6-1	TRBJ1-2	TRAV12-2	TRAJ41	0	0	0,333333333	0,666666667	2
clonotype202	3	0,000924784	TRA:CATDYQGAQKLVF;TRB:CASSAGGVPYNEQFF	TRA:TGTGCTACGGACTATCAGGGAGCCCAGAAGCTGGTATTT;TRB:TGTGCCAGCAGCGCGGGCGGGGTCCCCTACAATGAGCAGTTCTTC	CATDYQGAQKLVF	CASSAGGVPYNEQFF	TGTGCTACGGACTATCAGGGAGCCCAGAAGCTGGTATTT	TGTGCCAGCAGCGCGGGCGGGGTCCCCTACAATGAGCAGTTCTTC	FALSE	TRUE	TRUE	TRUE	0	0	TRAV17	TRAJ54	1,32E-06	0	0,666666667	1	1
clonotype205	3	0,000924784	TRA:CAVSDDKIIF;TRB:CATSRQANTDTQYF	TRA:TGTGCCGTCTCAGATGACAAGATCATCTTT;TRB:TGTGCCACCAGCAGACAGGCGAATACAGATACGCAGTATTTT	CAVSDDKIIF	CATSRQANTDTQYF	TGTGCCGTCTCAGATGACAAGATCATCTTT	TGTGCCACCAGCAGACAGGCGAATACAGATACGCAGTATTTT	TRUE	TRUE	TRUE	TRUE	TRBV15	TRBJ2-3	TRAV12-2	TRAJ30	3,97E-06	3,82E-06	0,666666667	0,333333333	1
clonotype204	3	0,000924784	TRA:CAVNLETDSWGKLQF;TRB:CASRVSGSHEQYV	TRA:TGTGCCGTGAACCTGGAGACTGACAGCTGGGGGAAATTGCAGTTT;TRB:TGTGCCAGCAGGGTTAGCGGGTCCCACGAGCAGTACGTC	CAVNLETDSWGKLQF	CASRVSGSHEQYV	TGTGCCGTGAACCTGGAGACTGACAGCTGGGGGAAATTGCAGTTT	TGTGCCAGCAGGGTTAGCGGGTCCCACGAGCAGTACGTC	TRUE	TRUE	TRUE	TRUE	TRBV6-5	TRBJ2-7	TRAV12-2	TRAJ24	9,27E-06	0	0	0	2
clonotype195	3	0,000924784	TRA:CAVGDDKIIF;TRB:CSASQAAAYEQYF	TRA:TGTGCCGTGGGAGATGACAAGATCATCTTT;TRB:TGCAGTGCTAGCCAGGCCGCGGCCTACGAGCAGTACTTC	CAVGDDKIIF	CSASQAAAYEQYF	TGTGCCGTGGGAGATGACAAGATCATCTTT	TGCAGTGCTAGCCAGGCCGCGGCCTACGAGCAGTACTTC	TRUE	TRUE	TRUE	TRUE	TRBV20-1	TRBJ2-7	TRAV12-2	TRAJ30	0	0	0	0,666666667	2
clonotype197	3	0,000924784	TRA:CVGGDDKIIF;TRB:CASSHGTAYGYTF	TRA:TGTGTGGGGGGAGATGACAAGATCATCTTT;TRB:TGCGCCAGCAGCCACGGGACGGCCTATGGCTACACCTTC	CVGGDDKIIF	CASSHGTAYGYTF	TGTGTGGGGGGAGATGACAAGATCATCTTT	TGCGCCAGCAGCCACGGGACGGCCTATGGCTACACCTTC	TRUE	TRUE	TRUE	TRUE	TRBV5-1	TRBJ1-2	TRAV12-1	TRAJ30	3,97E-06	0	0	0,666666667	2
clonotype196	3	0,000924784	TRA:CATDEVTNTGNQFYF;TRB:CASSVGGAFYNEQFF	TRA:TGTGCTACGGACGAAGTGACGAACACCGGTAACCAGTTCTATTTT;TRB:TGTGCCAGCAGCGTGGGGGGGGCCTTCTACAATGAGCAGTTCTTC	CATDEVTNTGNQFYF	CASSVGGAFYNEQFF	TGTGCTACGGACGAAGTGACGAACACCGGTAACCAGTTCTATTTT	TGTGCCAGCAGCGTGGGGGGGGCCTTCTACAATGAGCAGTTCTTC	TRUE	TRUE	TRUE	TRUE	TRBV9	TRBJ2-1	TRAV17	TRAJ49	3,97E-05	3,82E-06	0,666666667	0,666666667	2
clonotype191	3	0,000924784	TRA:CAVTGNQFYF;TRB:CASSPGLSYEQYV	TRA:TGTGCCGTGACCGGTAACCAGTTCTATTTT;TRB:TGTGCCAGCAGTCCGGGTCTCTCCTACGAGCAGTACGTC	CAVTGNQFYF	CASSPGLSYEQYV	TGTGCCGTGACCGGTAACCAGTTCTATTTT	TGTGCCAGCAGTCCGGGTCTCTCCTACGAGCAGTACGTC	FALSE	TRUE	TRUE	TRUE	TRBV6-2	TRBJ2-7	TRAV12-2	TRAJ49	0	0	0	0,666666667	2
clonotype190	3	0,000924784	TRA:CAGANARLMF;TRB:CASSEGLAGGPAGELFF	TRA:TGTGCCGGGGCCAATGCCAGACTCATGTTT;TRB:TGTGCCAGCAGCGAGGGACTAGCGGGGGGGCCGGCCGGGGAGCTGTTTTTT	CAGANARLMF	CASSEGLAGGPAGELFF	TGTGCCGGGGCCAATGCCAGACTCATGTTT	TGTGCCAGCAGCGAGGGACTAGCGGGGGGGCCGGCCGGGGAGCTGTTTTTT	TRUE	TRUE	TRUE	TRUE	TRBV7-6	TRBJ2-2	TRAV12-2	TRAJ31	1,19E-05	1,27E-06	0,666666667	0,333333333	1
clonotype193	3	0,000924784	TRA:CAGVLSRDDKIIF;TRB:CASSLSLGGQYNGYTF	TRA:TGTGCAGGCGTTCTCTCGAGGGATGACAAGATCATCTTT;TRB:TGTGCCAGCAGCTTATCCCTCGGGGGGCAATATAATGGCTACACCTTC	CAGVLSRDDKIIF	CASSLSLGGQYNGYTF	TGTGCAGGCGTTCTCTCGAGGGATGACAAGATCATCTTT	TGTGCCAGCAGCTTATCCCTCGGGGGGCAATATAATGGCTACACCTTC	TRUE	TRUE	TRUE	TRUE	TRBV7-6	TRBJ1-2	TRAV27	TRAJ30	5,30E-06	0	0	1	2
clonotype192	3	0,000924784	TRA:CAVTGARLMF;TRB:CASSSSGTGAYEQYF	TRA:TGTGCCGTGACAGGTGCCAGACTCATGTTT;TRB:TGTGCCAGTAGTTCCTCCGGGACAGGGGCCTACGAGCAGTACTTC	CAVTGARLMF	CASSSSGTGAYEQYF	TGTGCCGTGACAGGTGCCAGACTCATGTTT	TGTGCCAGTAGTTCCTCCGGGACAGGGGCCTACGAGCAGTACTTC	TRUE	FALSE	TRUE	TRUE	TRBV19	TRBJ2-7	TRAV12-2	TRAJ31	0	0	0,666666667	0,666666667	2
clonotype168	3	0,000924784	TRA:CAVSAGKSTF;TRB:CASSGQGIAYEQYF	TRA:TGTGCCGTCAGCGCAGGCAAATCAACCTTT;TRB:TGTGCCAGCAGTGGACAGGGTATCGCCTACGAGCAGTACTTC	CAVSAGKSTF	CASSGQGIAYEQYF	TGTGCCGTCAGCGCAGGCAAATCAACCTTT	TGTGCCAGCAGTGGACAGGGTATCGCCTACGAGCAGTACTTC	TRUE	TRUE	TRUE	TRUE	TRBV6-1	TRBJ2-7	TRAV12-2	TRAJ27	7,95E-06	0	0,333333333	1	2
