# Supplementary material for: Primary and secondary anti-viral response captured by the dynamics and phenotype of individual T cell clones
Source: eLife journal article supplement (doi:10.7554/elife.53704), 2020-02-21

**A** Percentage of cells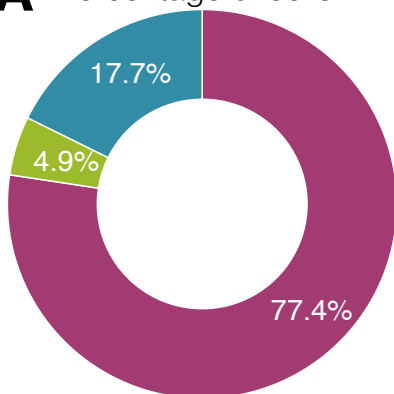

Percentage of clonotypes

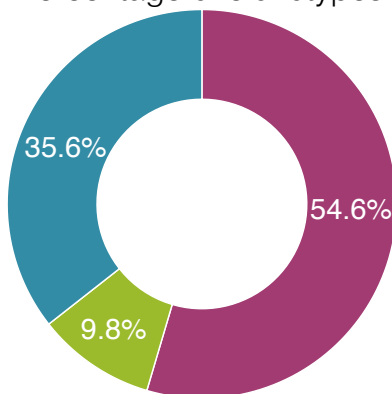

multiple TRA, multiple TRB  
no pair  
one TRA, one TRB

**B** Before TCR genes filtration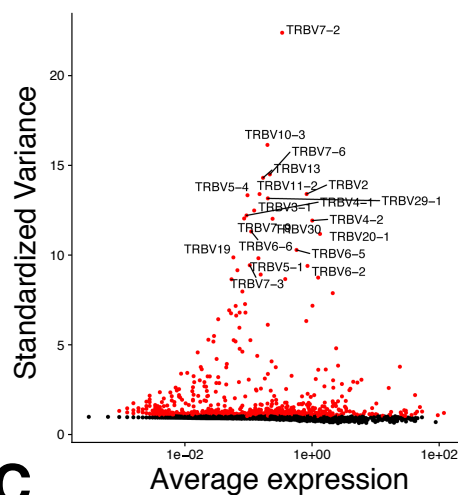

• Non-variable count: 12635  
• Variable count: 2000

After TCR genes filtration

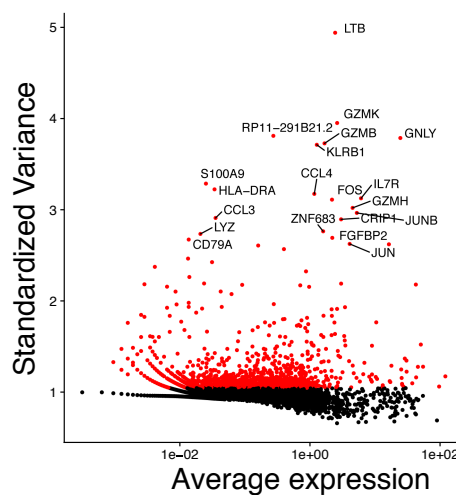

• Non-variable count: 12503  
• Variable count: 2000

**C**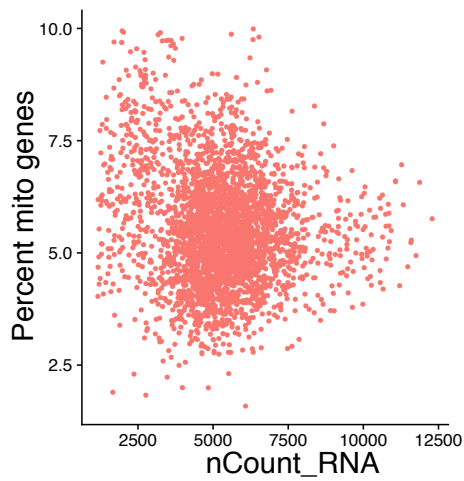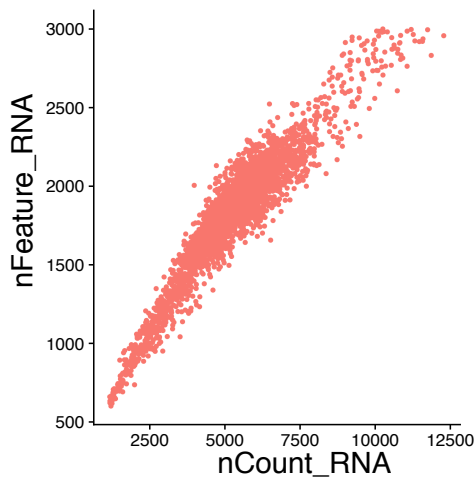

Supplement: supp [file elife-53704-supp-v1.zip › elife_poa_e53704_Figure_5_figure_supplement_3.pdf]
