# Supplementary material for: Primary and secondary anti-viral response captured by the dynamics and phenotype of individual T cell clones
Source: eLife journal article supplement (doi:10.7554/elife.53704), 2020-02-21
Supplement: supp [file elife-53704-supp-v1.zip › elife_poa_e53704_Figure_5_source_data_1.csv]

	p_val	avg_logFC	pct.1	pct.2	p_val_adj	cluster	gene
GZMH	0	1.52013022724111	0.978	0.356	0	1	GZMH
FGFBP2	0	1.39791334478888	0.893	0.263	0	1	FGFBP2
GNLY	0	1.12516209354828	0.998	0.703	0	1	GNLY
NKG7	0	1.09908399175767	1	0.915	0	1	NKG7
GZMB	3.21662162946906e-288	1.47444035232089	0.752	0.135	4.66506634921898e-284	1	GZMB
B2M	2.0303195736718e-226	0.283068050982407	1	1	2.94457247769621e-222	1	B2M
HLA-C	1.1055063757898e-225	0.329446743247069	1	1	1.60331589680795e-221	1	HLA-C
CST7	2.42350466471801e-215	0.620926932268041	0.998	0.89	3.51480881524053e-211	1	CST7
KLRD1	1.04918916988658e-201	0.835508775832545	0.921	0.533	1.52163905308651e-197	1	KLRD1
HLA-B	2.08132959372829e-201	0.299413045474048	1	0.999	3.01855230978415e-197	1	HLA-B
PRF1	7.56097848133957e-194	0.829776293576205	0.903	0.606	1.09656870914868e-189	1	PRF1
ZNF683	4.4990955384924e-173	1.05200335568984	0.711	0.233	6.52503825947553e-169	1	ZNF683
CX3CR1	3.81587090160653e-172	0.887301930626423	0.631	0.156	5.53415756859995e-168	1	CX3CR1
ADGRG1	7.90825225113081e-170	0.859085149479302	0.625	0.148	1.1469338239815e-165	1	ADGRG1
SH3BGRL3	2.26184530187142e-154	0.43123844006424	0.999	0.995	3.28035424130413e-150	1	SH3BGRL3
CD8A	1.58097935989433e-147	0.474876986717427	0.997	0.97	2.29289436565475e-143	1	CD8A
ZEB2	4.08577962904883e-142	0.777225607378745	0.701	0.288	5.92560619600952e-138	1	ZEB2
CCL4	3.63179922647773e-136	0.811603985348018	0.712	0.278	5.26719841816066e-132	1	CCL4
SPON2	2.3771667372795e-131	0.864875065795287	0.549	0.157	3.44760491907646e-127	1	SPON2
PRSS23	1.2412972767889e-122	0.585986791796179	0.375	0.041	1.80025344052694e-118	1	PRSS23
CD52	2.023904618809e-117	0.342605890536745	1	0.99	2.9352688686587e-113	1	CD52
S100A4	4.33530369480432e-101	0.439415958930359	0.997	0.959	6.28749094857471e-97	1	S100A4
HLA-A	2.98174814735288e-98	0.278855344028414	0.999	0.995	4.32442933810588e-94	1	HLA-A
EFHD2	4.8255286697652e-96	0.609651633829005	0.608	0.271	6.99846422976047e-92	1	EFHD2
CYBA	8.08476798757417e-93	0.399331250806282	0.985	0.946	1.17253390123788e-88	1	CYBA
S1PR5	9.84826331749882e-91	0.589998293961321	0.517	0.189	1.42829362893685e-86	1	S1PR5
FCRL6	1.66566317560854e-89	0.5482565502516	0.478	0.143	2.41571130358507e-85	1	FCRL6
PLEK	8.87363619004084e-88	0.544763495603585	0.77	0.512	1.28694345664162e-83	1	PLEK
FGR	5.34789909848941e-87	0.546707591533923	0.419	0.112	7.7560580625392e-83	1	FGR
SRGN	6.57644877177106e-83	0.429174013256337	0.938	0.81	9.53782365369957e-79	1	SRGN
LITAF	1.58754819652244e-80	0.412159478563198	0.937	0.846	2.30242114941649e-76	1	LITAF
ITGB2	2.66813672905194e-80	0.420252272069787	0.947	0.87	3.86959869814402e-76	1	ITGB2
ARPC2	5.24940184892857e-78	0.366304315401841	0.986	0.924	7.61320750150111e-74	1	ARPC2
CD3G	9.7545103088387e-78	0.406723479733797	0.947	0.831	1.41469663009088e-73	1	CD3G
RAP1B	2.58266176627129e-77	0.399090938669109	0.928	0.839	3.74563435962325e-73	1	RAP1B
TBX21	2.72478851472142e-77	0.530932695281618	0.615	0.307	3.95176078290048e-73	1	TBX21
TTC38	1.45443660868766e-73	0.470848841908686	0.33	0.069	2.10936941357972e-69	1	TTC38
APMAP	3.36103452505782e-71	0.451071737574969	0.749	0.527	4.87450837169135e-67	1	APMAP
TGFBR3	3.64050513562965e-69	0.510765685530163	0.603	0.322	5.27982459820368e-65	1	TGFBR3
GZMM	5.92514230726911e-67	0.375863897871599	0.91	0.781	8.59323388823239e-63	1	GZMM
PFN1	1.2592689767113e-62	0.26905563805526	1	0.999	1.8263177969244e-58	1	PFN1
TNFRSF1B	2.25532330126703e-62	0.442104502166713	0.656	0.424	3.27089538382757e-58	1	TNFRSF1B
LSP1	1.00947429235554e-60	0.311188881780687	0.972	0.924	1.46404056620323e-56	1	LSP1
CD99	1.57197906182536e-57	0.285536028340201	0.982	0.927	2.27984123336532e-53	1	CD99
CTSW	7.12504034009162e-55	0.316783442721038	0.964	0.918	1.03334460052349e-50	1	CTSW
PYHIN1	6.59890164602991e-54	0.426240267558175	0.621	0.413	9.57038705723717e-50	1	PYHIN1
CFL1	6.03899396749024e-52	0.254303078136263	0.997	0.984	8.75835295105109e-48	1	CFL1
LGALS1	1.74394680107217e-50	0.538899657431052	0.318	0.113	2.52924604559497e-46	1	LGALS1
S100A6	3.18027404328408e-50	0.308671903268769	0.978	0.944	4.6123514449749e-46	1	S100A6
CD3D	1.54099577085662e-48	0.29813432980767	0.972	0.936	2.23490616647335e-44	1	CD3D
ABI3	2.93540197774179e-47	0.370157264544617	0.389	0.178	4.25721348831892e-43	1	ABI3
ACTB	4.43440284106962e-47	0.305607164376393	1	1	6.43121444040328e-43	1	ACTB
C1orf21	8.80100416542651e-46	0.372445709396928	0.428	0.199	1.27640963411181e-41	1	C1orf21
ID2	1.56073392943469e-44	0.454856118663677	0.591	0.38	2.26353241785913e-40	1	ID2
FLNA	1.74698180028173e-44	0.368822084723656	0.818	0.686	2.53364770494859e-40	1	FLNA
LY6E	2.38415915401398e-42	0.290011060329156	0.913	0.848	3.45774602106648e-38	1	LY6E
KLRB1	8.23021414920101e-42	0.655395933759809	0.428	0.247	1.19362795805862e-37	1	KLRB1
IFITM2	8.22009145280509e-41	0.320256555577785	0.928	0.859	1.19215986340032e-36	1	IFITM2
SLC9A3R1	2.05299554074357e-39	0.300787847684846	0.858	0.761	2.97745943274039e-35	1	SLC9A3R1
TPST2	2.2898282279594e-38	0.335046323888021	0.591	0.428	3.32093787900952e-34	1	TPST2
BIN2	2.4274897260453e-38	0.293533483546918	0.83	0.727	3.5205883496835e-34	1	BIN2
CD2	4.15794331827462e-38	0.299928418569645	0.883	0.8	6.03026519449367e-34	1	CD2
SYNE1	1.29428544316999e-36	0.343607957179104	0.583	0.398	1.87710217822944e-32	1	SYNE1
C12orf75	2.13036089871345e-36	0.319507228340396	0.707	0.535	3.08966241140411e-32	1	C12orf75
SELPLG	4.41652783271458e-35	0.294404927986004	0.806	0.7	6.40529031578595e-31	1	SELPLG
CHST12	2.1545440766975e-34	0.31465821107039	0.509	0.338	3.12473527443438e-30	1	CHST12
HLA-DPB1	1.00717970620796e-33	0.304845997517199	0.684	0.55	1.4607127279134e-29	1	HLA-DPB1
GNG2	1.02862170432735e-33	0.312397674369824	0.709	0.565	1.49181005778596e-29	1	GNG2
CLIC1	5.6196552051188e-33	0.257822278287277	0.915	0.848	8.1501859439838e-29	1	CLIC1
MYO1G	2.18218342868905e-32	0.310062261883275	0.568	0.41	3.16482062662772e-28	1	MYO1G
AOAH	2.25200806697541e-32	0.322682767037293	0.279	0.129	3.26608729953444e-28	1	AOAH
RARRES3	5.14672186284836e-32	0.256505085660591	0.91	0.837	7.46429071768897e-28	1	RARRES3
SPN	5.77487521370696e-32	0.323714539833514	0.603	0.44	8.3753015224392e-28	1	SPN
OSTF1	2.48350981549534e-31	0.268858734080925	0.638	0.522	3.60183428541289e-27	1	OSTF1
PRR5L	4.21574489405751e-31	0.278635471725984	0.259	0.097	6.11409481985161e-27	1	PRR5L
MSN	5.45208411862584e-31	0.267791608075951	0.841	0.762	7.90715759724306e-27	1	MSN
PXN	1.38712350543735e-30	0.288085854611166	0.585	0.452	2.01174521993579e-26	1	PXN
CTSD	4.94658884081707e-29	0.264744768971729	0.606	0.489	7.174037795837e-25	1	CTSD
CTSC	5.50917849538223e-29	0.283210327180257	0.629	0.487	7.98996157185284e-25	1	CTSC
ITGAL	6.11479843848874e-29	0.300070495159427	0.534	0.378	8.86829217534022e-25	1	ITGAL
MYO1F	1.48869978448569e-28	0.277047107524569	0.631	0.502	2.1590612974396e-24	1	MYO1F
PTMS	1.92747410517482e-28	0.321521727220418	0.327	0.173	2.79541569473504e-24	1	PTMS
GLIPR2	1.93140114665614e-28	0.282693918627681	0.503	0.348	2.80111108299539e-24	1	GLIPR2
PTGDR	7.68537062607764e-28	0.296952827962556	0.266	0.112	1.11460930190004e-23	1	PTGDR
DOK2	9.94242031250752e-28	0.294442254347899	0.521	0.361	1.44194921792297e-23	1	DOK2
DYNLL1	1.84865337338306e-27	0.308540926325781	0.544	0.405	2.68110198741745e-23	1	DYNLL1
RASSF1	2.24853265330652e-27	0.290179185156676	0.499	0.352	3.26104690709044e-23	1	RASSF1
USP28	2.20040147191258e-26	0.272874320689626	0.305	0.159	3.19124225471481e-22	1	USP28
TSEN54	3.50589883082733e-26	0.250259907416676	0.465	0.347	5.08460507434888e-22	1	TSEN54
CLIC3	1.42140961121532e-25	0.330268805741764	0.39	0.246	2.06147035914558e-21	1	CLIC3
CLEC2D	3.13102038293154e-25	0.265534728718697	0.767	0.667	4.54091886136561e-21	1	CLEC2D
PLEKHF1	2.40102356335071e-24	0.259143612188542	0.259	0.119	3.48220447392753e-20	1	PLEKHF1
KIAA1551	4.50226448398285e-24	0.257778796046735	0.791	0.695	6.52963418112033e-20	1	KIAA1551
VCL	1.6085791229582e-23	0.262122264034109	0.276	0.151	2.33292230202628e-19	1	VCL
DNAJC1	2.13081503411331e-23	0.267849674536693	0.386	0.241	3.09032104397453e-19	1	DNAJC1
SH2D2A	2.31363014104814e-23	0.261616811474702	0.586	0.463	3.35545779356212e-19	1	SH2D2A
ITGAM	8.373460678189e-23	0.268882857459199	0.306	0.163	1.21440300215775e-18	1	ITGAM
APOBEC3G	9.35079062191471e-23	0.25181004023332	0.405	0.288	1.35614516389629e-18	1	APOBEC3G
BHLHE40	1.04375256461154e-22	0.27806850335938	0.371	0.218	1.51375434445611e-18	1	BHLHE40
CALR	1.44582970250465e-22	0.252521703003727	0.822	0.75	2.09688681754249e-18	1	CALR
ACTN4	1.649732009049e-22	0.267522905574197	0.423	0.274	2.39260633272377e-18	1	ACTN4
CRIP1	6.3670450435966e-17	0.258371678638197	0.859	0.769	9.23412542672815e-13	1	CRIP1
IRF1	6.90665822404477e-16	0.251382124436329	0.608	0.497	1.00167264223321e-11	1	IRF1
GZMK	0	1.78532342430022	0.892	0.109	0	2	GZMK
LTB	0	1.50713930183711	0.879	0.253	0	2	LTB
RPL13	6.45979324855539e-279	0.344407464228174	1	1	9.36863814837988e-275	2	RPL13
RPLP1	7.73983079315206e-244	0.388468359481154	1	0.999	1.12250765993084e-239	2	RPLP1
RPS12	5.2167249366261e-219	0.307796338140093	1	1	7.56581617558884e-215	2	RPS12
IL7R	8.85915389600351e-213	0.89676171110572	0.971	0.601	1.28484308953739e-208	2	IL7R
LDHB	2.52021454566686e-201	0.666399923070907	0.982	0.819	3.65506715558065e-197	2	LDHB
RPS18	7.40134696501158e-192	0.351653204965107	1	1	1.07341735033563e-187	2	RPS18
RPS8	9.17759287123305e-184	0.304933129695923	1	1	1.33102629411493e-179	2	RPS8
CCR7	2.56458379459732e-171	0.67174966507376	0.375	0.011	3.71941587730449e-167	2	CCR7
RPL32	1.54286193065904e-169	0.261002314572906	1	1	2.23761265803481e-165	2	RPL32
RPLP2	6.21197653893846e-157	0.277003046835361	1	1	9.00922957442245e-153	2	RPLP2
RPS6	2.85589851802763e-141	0.302542184381756	1	0.999	4.14190962069547e-137	2	RPS6
TPT1	6.34276280103914e-135	0.304775102749441	1	0.999	9.19890889034706e-131	2	TPT1
RCAN3	2.07511867417684e-123	0.490457719759811	0.309	0.017	3.00954461315866e-119	2	RCAN3
RPLP0	2.64129446968681e-121	0.310012000915567	1	0.999	3.83066936938678e-117	2	RPLP0
TCF7	2.7471751277477e-121	0.655906785345266	0.62	0.2	3.98422808777249e-117	2	TCF7
RPS5	1.60766504554822e-120	0.29151293694569	1	0.998	2.33159661555858e-116	2	RPS5
RPL36	2.31535040815909e-114	0.284172208104544	1	0.998	3.35795269695313e-110	2	RPL36
EEF1B2	3.04656654033152e-110	0.34769645548776	0.999	0.987	4.41843545344281e-106	2	EEF1B2
RPL10A	1.6935174973596e-108	0.27454512568175	1	0.996	2.45610842642063e-104	2	RPL10A
CD28	5.30805948696545e-107	0.460126545582499	0.334	0.037	7.69827867394599e-103	2	CD28
COTL1	1.29428057453475e-105	0.53147211164361	0.762	0.362	1.87709511724774e-101	2	COTL1
SELL	5.78437703138748e-102	0.48201648267453	0.91	0.575	8.38908200862127e-98	2	SELL
GPR183	1.06621492344442e-101	0.501365663380461	0.395	0.073	1.54633150347144e-97	2	GPR183
LEF1	3.18427850510686e-95	0.535896549009722	0.537	0.174	4.61815911595647e-91	2	LEF1
RPL9	2.64897714796561e-93	0.253337754504443	1	0.996	3.84181155769453e-89	2	RPL9
CAMK4	1.76877392378636e-91	0.492117990178138	0.67	0.295	2.56525282166735e-87	2	CAMK4
PABPC1	8.95916586090308e-89	0.328748109828485	0.998	0.968	1.29934782480677e-84	2	PABPC1
MYC	2.33231269411833e-88	0.438875668595098	0.287	0.033	3.38255310027982e-84	2	MYC
RPS9	3.87612826173932e-83	0.277301565821568	1	0.989	5.62154881800053e-79	2	RPS9
INPP4B	4.07955105007993e-75	0.457773229994502	0.379	0.096	5.91657288793092e-71	2	INPP4B
RPL4	1.80626659886496e-74	0.287276617337761	0.999	0.989	2.61962844833385e-70	2	RPL4
AQP3	1.01843683848444e-73	0.385624704012573	0.287	0.048	1.47703894685398e-69	2	AQP3
EEF1G	1.44107742418197e-68	0.271803317414091	0.998	0.975	2.08999458829111e-64	2	EEF1G
NOSIP	1.16738043870137e-64	0.458786318032065	0.797	0.527	1.69305185024859e-60	2	NOSIP
JUNB	1.95431323469761e-64	0.534757317624489	0.957	0.847	2.83434048428195e-60	2	JUNB
TRAT1	1.16694861004227e-62	0.305041853785849	0.253	0.046	1.69242556914431e-58	2	TRAT1
CD74	1.77977967112256e-61	0.429969183654076	0.947	0.795	2.58121445702904e-57	2	CD74
PASK	1.44067971253213e-60	0.402517460382041	0.293	0.066	2.08941778708535e-56	2	PASK
SH3YL1	1.58623334407734e-53	0.293184388818962	0.29	0.08	2.30051421891537e-49	2	SH3YL1
SATB1	1.78452325825454e-53	0.311886712555984	0.463	0.202	2.58809408144656e-49	2	SATB1
FOS	3.58870119556051e-50	0.483538113943985	0.757	0.495	5.2046933439214e-46	2	FOS
LDLRAP1	2.80203697361545e-49	0.351314392436857	0.534	0.264	4.06379422283449e-45	2	LDLRAP1
ABLIM1	7.66501953500252e-48	0.329779938843855	0.511	0.25	1.11165778316142e-43	2	ABLIM1
CNN2	3.7942297694506e-47	0.292440856370778	0.89	0.677	5.5027714346342e-43	2	CNN2
CD69	1.19269671700936e-46	0.320168213917589	0.79	0.536	1.72976804867868e-42	2	CD69
CCDC109B	8.45358998085951e-46	0.277543667572855	0.76	0.501	1.22602415492405e-41	2	CCDC109B
PAG1	1.29817041424323e-44	0.304210456754947	0.423	0.187	1.88273655177695e-40	2	PAG1
DGKA	2.24856423435741e-44	0.255997261098368	0.447	0.216	3.26109270908855e-40	2	DGKA
SNHG8	1.99247493990031e-43	0.311444769561568	0.63	0.37	2.88968640533742e-39	2	SNHG8
CLDND1	4.53722366592513e-42	0.390023153578557	0.61	0.357	6.58033548269121e-38	2	CLDND1
TMEM123	1.21565901996673e-40	0.289905821799735	0.776	0.539	1.76307027665775e-36	2	TMEM123
C6orf48	4.45648261532646e-40	0.261340630730112	0.496	0.263	6.46323673700796e-36	2	C6orf48
PDCD4	1.82329333164428e-35	0.262759201294394	0.701	0.469	2.6443223188837e-31	2	PDCD4
ARHGAP15	1.98112263039855e-34	0.269991189937224	0.661	0.43	2.87322215086702e-30	2	ARHGAP15
DUSP1	6.7381426854742e-34	0.292653647097537	0.876	0.696	9.77232833674323e-30	2	DUSP1
CXCR3	4.08335772198059e-31	0.257227413014707	0.489	0.279	5.92209370418844e-27	2	CXCR3
VPS26B	1.87551882819512e-37	0.251788153266699	0.278	0.309	2.72006495653139e-33	3	VPS26B
HIST1H1E	3.51984887022172e-34	0.571831597355418	0.419	0.441	5.10483681648256e-30	3	HIST1H1E
RPS26	1.58977053759636e-26	0.25198417222295	1	1	2.305644210676e-22	3	RPS26
MT-ND6	4.79588878883349e-26	0.265326003963025	0.671	0.867	6.95547751044521e-22	3	MT-ND6
RPL5	6.49302438159002e-19	0.254569340181146	0.996	1	9.41683326062e-15	3	RPL5
