# Supplementary material for: Primary and secondary anti-viral response captured by the dynamics and phenotype of individual T cell clones
Source: eLife journal article supplement (doi:10.7554/elife.53704), 2020-02-21
Supplement: supp [file elife-53704-supp-v1.zip › elife_poa_e53704_Figure_5_source_data_2.csv]

	p_val	avg_logFC	pct.1	pct.2	p_val_adj	cluster	gene
LTB	3.97145053468566e-25	1.00981966215538	1	0.956	5.36344394709299e-21	2	LTB
RPLP1	3.66758558720598e-23	0.31240805373614	1	1	4.95307433552167e-19	2	RPLP1
GZMK	2.21958308033578e-22	0.894808186394133	0.99	0.779	2.99754694999347e-18	2	GZMK
RPS12	7.86688297879114e-22	0.250957470332793	1	1	1.06242254628574e-17	2	RPS12
IL7R	1.58092859885268e-19	0.570801125371954	1	1	2.13504407275054e-15	2	IL7R
LDHB	1.57351470284491e-18	0.448787246128639	1	1	2.12503160619205e-14	2	LDHB
RPLP0	3.28205798398465e-18	0.263822417605865	1	1	4.43241930737126e-14	2	RPLP0
CCR7	2.05551619894804e-14	0.509442752836629	0.844	0.368	2.77597462667933e-10	2	CCR7
SELL	1.33203527873192e-13	0.44927326797386	1	0.985	1.79891364392746e-09	2	SELL
LEF1	2.6611396003049e-13	0.430449821131097	0.938	0.794	3.59386903021177e-09	2	LEF1
RCAN3	2.00170502348606e-12	0.369157976348501	0.833	0.412	2.70330263421792e-08	2	RCAN3
TCF7	1.7591379466034e-10	0.443619187711553	0.969	0.75	2.37571579688789e-06	2	TCF7
GPR183	5.85912243639605e-10	0.342439831784309	0.823	0.618	7.91274485035287e-06	2	GPR183
CD28	9.54461219438156e-10	0.305761675821096	0.844	0.515	1.28899987685123e-05	2	CD28
TMEM123	1.56176603546513e-07	0.25571851912252	1	0.971	0.00210916503089565	2	TMEM123
COTL1	1.81467013495407e-07	0.329802086604454	0.99	0.941	0.00245071201725547	2	COTL1
MYC	2.0220922271192e-07	0.287174119411677	0.792	0.5	0.00273083555272448	2	MYC
JUNB	2.42362937950584e-07	0.362456211623068	1	1	0.00327311147702264	2	JUNB
AQP3	2.48560177290531e-07	0.281153218453182	0.781	0.544	0.00335680519430862	2	AQP3
CAMK4	3.1623401780451e-07	0.280375762931156	0.99	0.897	0.00427074041044991	2	CAMK4
SATB1	3.5408702848407e-07	0.300532853348645	0.938	0.779	0.00478194531967737	2	SATB1
FOS	5.83459840016078e-07	0.388136196524104	1	0.971	0.00787962513941713	2	FOS
ARHGAP15	1.53786932170969e-06	0.266368415822989	1	0.971	0.0207689251896893	2	ARHGAP15
ABLIM1	3.21056470048319e-06	0.276442458949975	0.938	0.853	0.0433586762800254	2	ABLIM1
NOSIP	7.91623641470231e-06	0.270761748204052	1	0.985	0.106908772780555	2	NOSIP
PASK	1.2293564880276e-05	0.273308814984445	0.74	0.647	0.166024593708127	2	PASK
CLDND1	0.000119147624998636	0.254057306816709	1	0.926	1	2	CLDND1
FGFBP2	5.61683593757317e-32	1.05821561994835	1	0.823	7.58553693369256e-28	1	FGFBP2
GZMH	4.54886847427177e-29	1.13458407200076	1	0.885	6.14324687450402e-25	1	GZMH
NKG7	1.51259832073731e-26	0.876874806998883	1	1	2.04276403215573e-22	1	NKG7
GZMB	3.01475386908952e-25	1.10806856234939	1	0.625	4.07142510020539e-21	1	GZMB
ADGRG1	6.21423970582252e-23	0.731518122112194	0.941	0.604	8.39233072271332e-19	1	ADGRG1
SPON2	1.97374397004764e-21	0.71192092857938	0.956	0.677	2.66554123154934e-17	1	SPON2
CYBA	5.21052957118878e-20	0.390856482644049	1	1	7.03682018589044e-16	1	CYBA
KLRD1	2.33714648795272e-19	0.626051395302397	0.985	0.979	3.15631633198015e-15	1	KLRD1
CST7	5.2773977574588e-19	0.54240063528061	1	1	7.12712567144812e-15	1	CST7
ZEB2	6.12205475887698e-19	0.57679629324099	0.985	0.854	8.26783495186336e-15	1	ZEB2
TBX21	8.13150508368034e-19	0.462949535618718	1	0.854	1.09815976155103e-14	1	TBX21
CX3CR1	1.03918273678556e-18	0.639914339394434	0.985	0.729	1.4034162860289e-14	1	CX3CR1
SH3BGRL3	3.65340144906752e-18	0.353622639590449	1	1	4.93391865696569e-14	1	SH3BGRL3
PRSS23	8.48225186553285e-18	0.474438824968675	0.941	0.51	1.14552811444021e-13	1	PRSS23
LITAF	2.322226402025e-17	0.41889903431218	1	1	3.13616675593476e-13	1	LITAF
PRF1	6.85974844668718e-16	0.536971025224227	1	0.958	9.26409027725104e-12	1	PRF1
GNLY	1.48714330938589e-15	0.828067832031729	1	0.958	2.00838703932565e-11	1	GNLY
ITGB2	2.35605308324732e-15	0.378661410395083	1	1	3.18184968892551e-11	1	ITGB2
PLEK	5.87619687058322e-15	0.430658966840176	1	0.979	7.93580387372264e-11	1	PLEK
CD8A	1.34433196332581e-14	0.353822312623884	1	1	1.8155203164715e-10	1	CD8A
PFN1	5.37559495212704e-14	0.271656936797478	1	1	7.25974098284757e-10	1	PFN1
CCL4	9.8339513915796e-14	0.578114953493147	1	0.792	1.32807513543282e-09	1	CCL4
CTSC	1.09685207342477e-13	0.341283980690205	1	0.938	1.48129872516015e-09	1	CTSC
ARPC2	1.31656966216964e-13	0.295697821021968	1	1	1.7780273287601e-09	1	ARPC2
EFHD2	1.74179617944409e-13	0.436410332305856	1	0.854	2.35229574033925e-09	1	EFHD2
TTC38	1.32586219739001e-12	0.400977134456528	0.912	0.552	1.79057689757521e-08	1	TTC38
ZNF683	2.12267633943743e-12	0.711241005743788	0.971	0.719	2.86667439641026e-08	1	ZNF683
S1PR5	2.30342722099427e-12	0.389870854134819	0.985	0.771	3.11077846195276e-08	1	S1PR5
S100A4	2.56175756749341e-12	0.32729038329405	1	1	3.45965359489986e-08	1	S100A4
LSP1	4.99200613477356e-12	0.272255309928488	1	1	6.74170428501169e-08	1	LSP1
PYHIN1	7.03132675695046e-12	0.333064587376765	1	0.938	9.4958067852616e-08	1	PYHIN1
APMAP	9.24914761362404e-12	0.35368289505649	1	0.948	1.24909738521993e-07	1	APMAP
FCRL6	1.70946277048558e-11	0.395229803443258	0.912	0.656	2.30862947154078e-07	1	FCRL6
SRGN	2.31440587699324e-11	0.342429076793966	1	1	3.12560513687938e-07	1	SRGN
C1orf21	2.75434866799807e-11	0.365606076700289	0.941	0.646	3.71974787613139e-07	1	C1orf21
TNFRSF1B	3.01571456487206e-11	0.339367857865725	1	0.906	4.07272251985972e-07	1	TNFRSF1B
FGR	3.54062044680771e-11	0.324910914993467	0.912	0.698	4.78160791341381e-07	1	FGR
CTSW	9.80512525137152e-11	0.296657189196004	1	1	1.32418216519772e-06	1	CTSW
C12orf75	1.32379959311637e-10	0.359022606646896	1	0.948	1.78779135050366e-06	1	C12orf75
CD3G	1.38680489451212e-10	0.268340710712184	1	1	1.87288001003862e-06	1	CD3G
DBI	5.48398252324957e-10	0.292541148312834	1	0.958	7.40611839764855e-06	1	DBI
RAB1B	6.11448462685355e-10	0.271094523893645	0.956	0.917	8.25761148856572e-06	1	RAB1B
GLIPR2	6.27112481343307e-10	0.297274658740645	0.985	0.854	8.46915406054137e-06	1	GLIPR2
DYNLL1	8.20499270382744e-10	0.290030008431312	0.985	0.948	1.1080842646519e-05	1	DYNLL1
RAP1B	8.93701249876869e-10	0.272059661800176	1	1	1.20694353795871e-05	1	RAP1B
CD99	9.2688035391378e-10	0.257727226019041	1	1	1.25175191796056e-05	1	CD99
TGFBR3	1.1564202134115e-09	0.362589210745133	0.971	0.906	1.56174549821223e-05	1	TGFBR3
SLC9A3R1	1.85513748159046e-09	0.279317996662957	1	1	2.50536316888792e-05	1	SLC9A3R1
ASCL2	2.59450910608901e-09	0.259699630181575	0.765	0.323	3.5038845477732e-05	1	ASCL2
GZMM	7.59788240264065e-09	0.309456163579367	1	1	0.000102609401847662	1	GZMM
ABHD17A	9.32669324486014e-09	0.272654837173842	0.941	0.802	0.000125956992271836	1	ABHD17A
DOK2	4.10297482051422e-08	0.281573922966222	0.971	0.917	0.000554106749510445	1	DOK2
CLIC1	1.36606143298182e-07	0.250979229301495	1	0.99	0.00184486596524195	1	CLIC1
PTGDR	1.93397816540748e-07	0.258644908296541	0.824	0.521	0.0026118375123828	1	PTGDR
SPN	2.55175508661679e-07	0.280793357659782	1	0.969	0.00344614524447597	1	SPN
LAIR2	5.26489229888225e-07	0.252941529944892	0.706	0.344	0.00711023704964048	1	LAIR2
LGALS1	1.03378109008485e-06	0.360592340055393	0.838	0.521	0.0139612136215959	1	LGALS1
SH2D2A	1.32256554692506e-06	0.277147111150347	0.956	0.927	0.017861247711223	1	SH2D2A
TPST2	1.67131109847642e-06	0.253687226722051	1	0.885	0.0225710563849241	1	TPST2
FCGR3A	1.78876469431946e-06	0.279412852679037	0.779	0.479	0.0241572671967843	1	FCGR3A
CLIC3	1.85205473261073e-06	0.354720586528534	0.912	0.781	0.0250119991639079	1	CLIC3
FLNA	6.55333837872616e-06	0.257441554404893	1	0.99	0.0885028348046968	1	FLNA
KLRB1	0.000572751516757991	0.437291758907217	0.868	0.729	1	1	KLRB1
