# Supplementary figures and images for: Primary and secondary anti-viral response captured by the dynamics and phenotype of individual T cell clones
Source: eLife journal article supplement (doi:10.7554/elife.53704), 2020-02-21

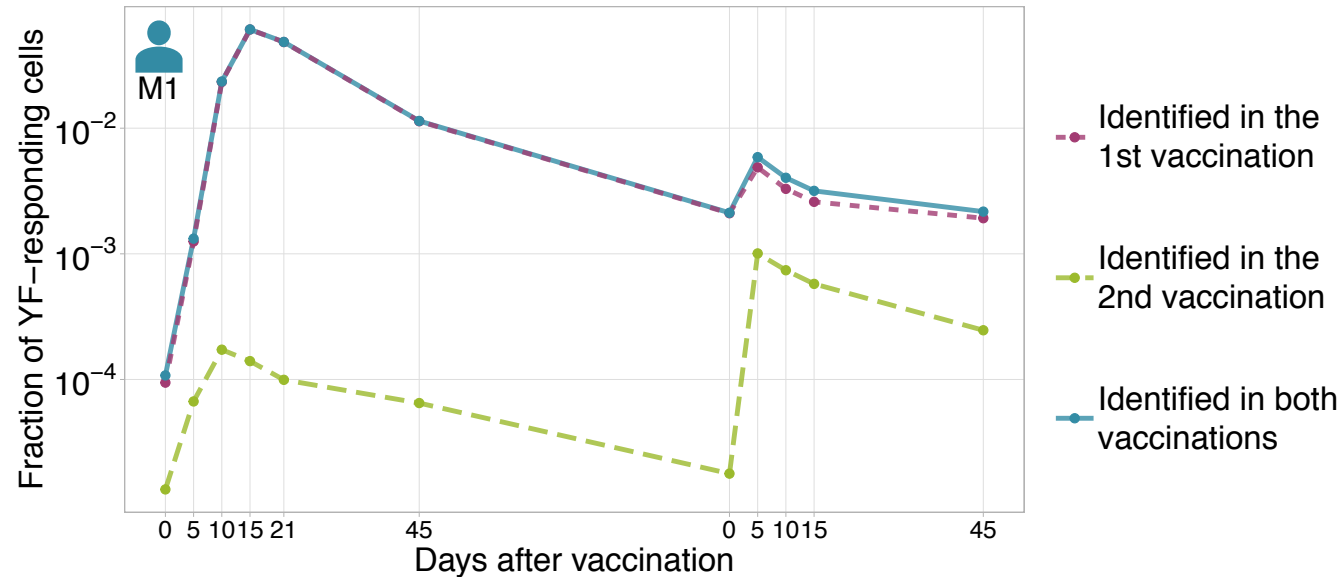

Supplement: supp [file elife-53704-supp-v1.zip › elife_poa_e53704_Figure_1_figure_supplement_1.pdf]

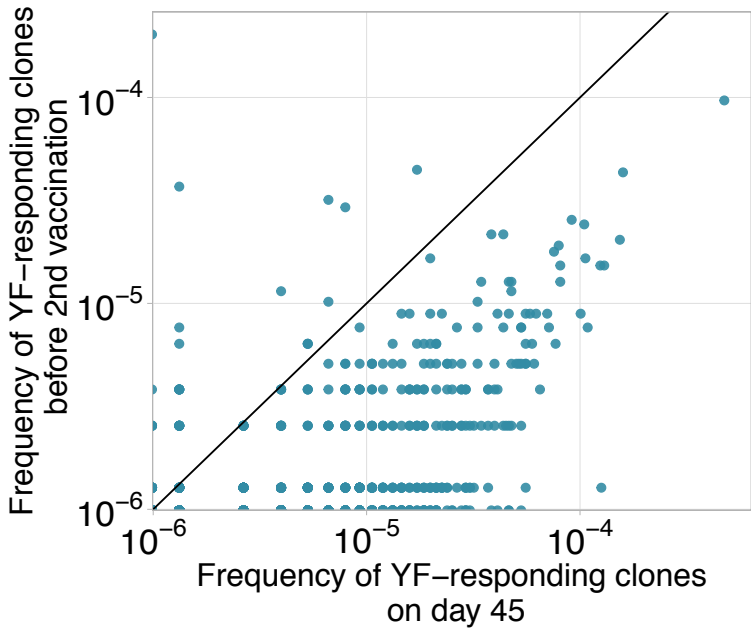

Supplement: supp [file elife-53704-supp-v1.zip › elife_poa_e53704_Figure_2_figure_supplement_2.pdf]

**A**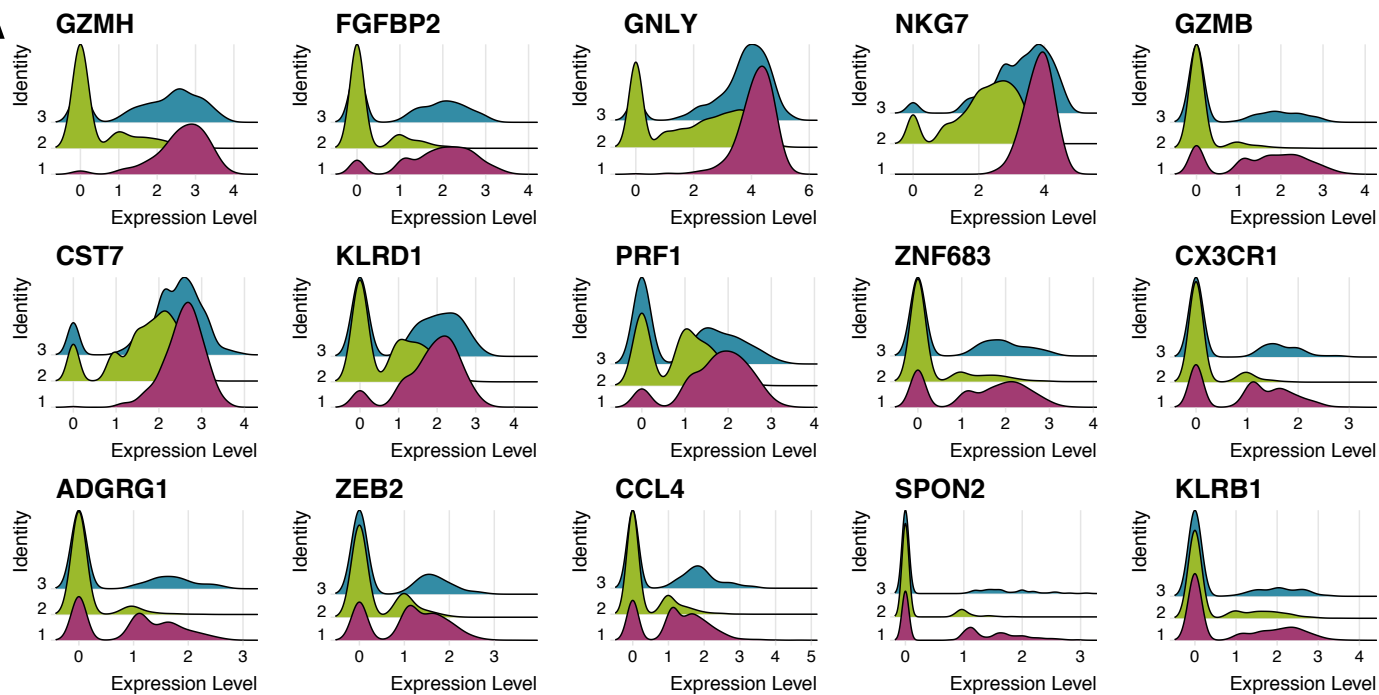**B**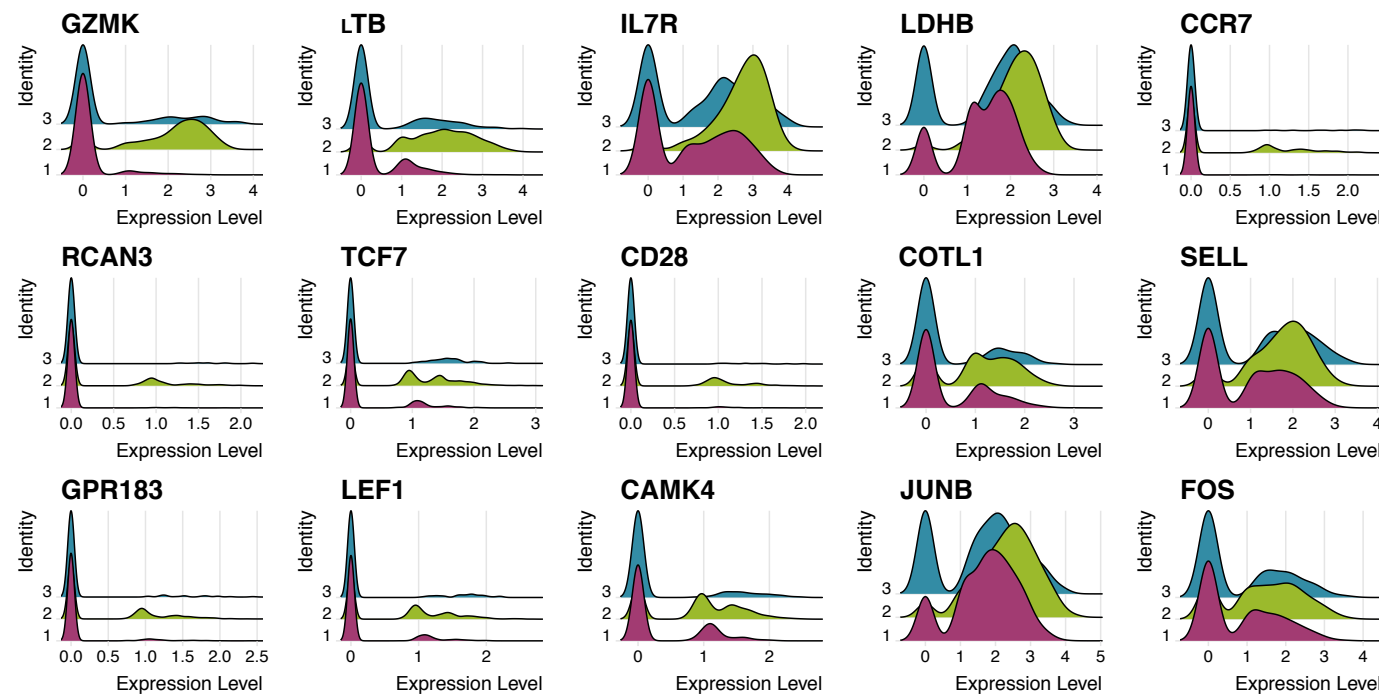

Supplement: supp [file elife-53704-supp-v1.zip › elife_poa_e53704_Figure_5_figure_supplement_1.pdf]

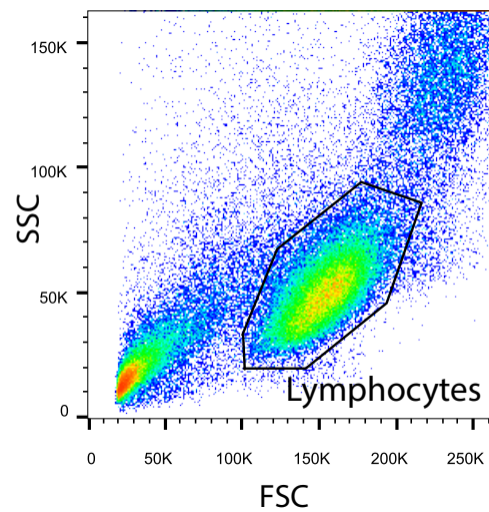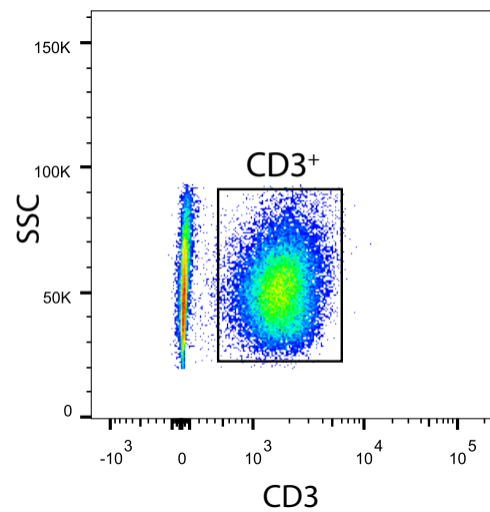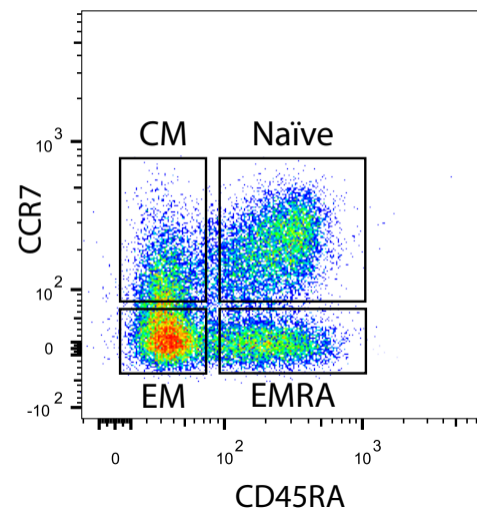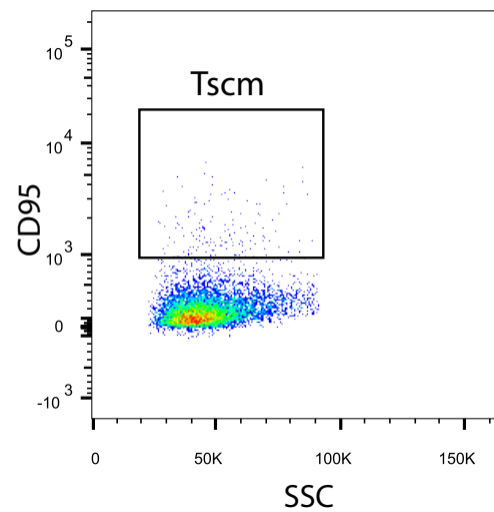

Supplement: supp [file elife-53704-supp-v1.zip › elife_poa_e53704_Figure_3_figure_supplement_1.pdf]

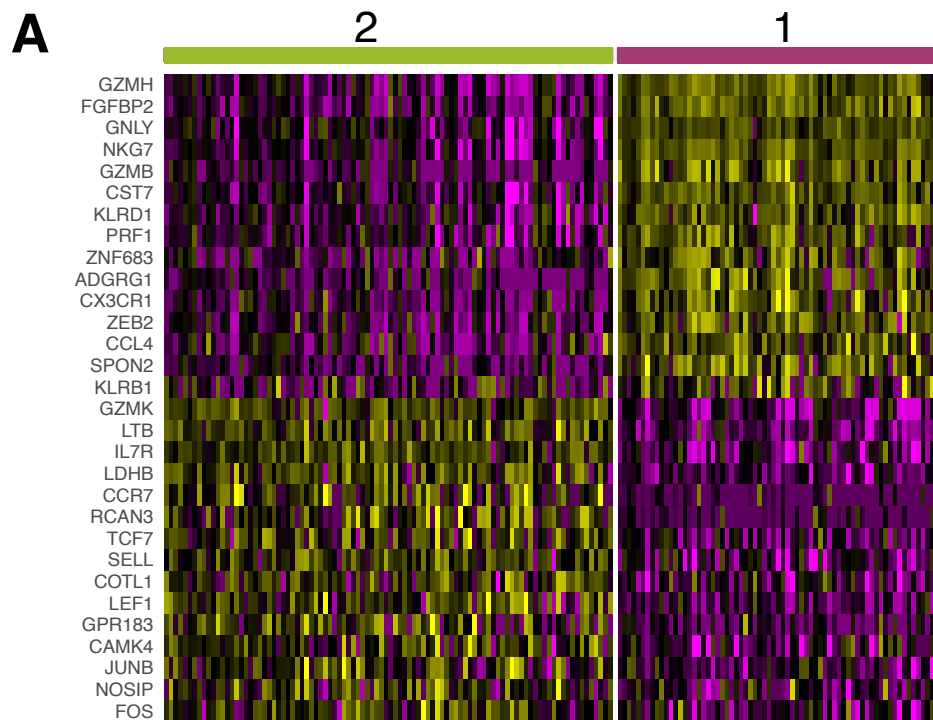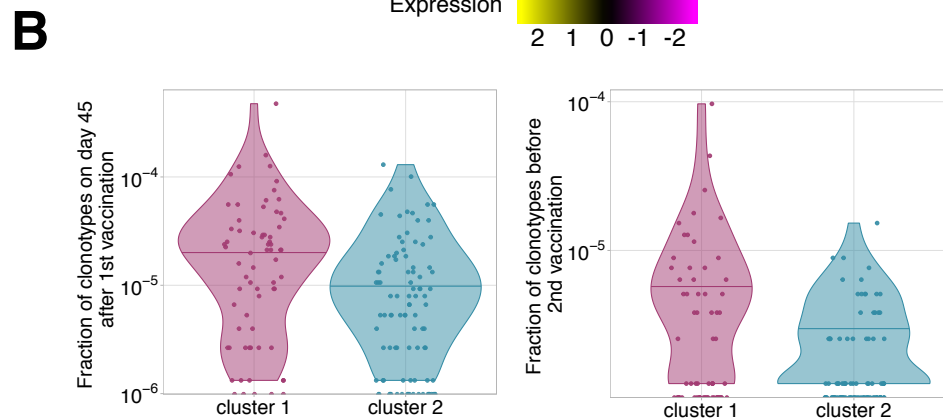

Supplement: supp [file elife-53704-supp-v1.zip › elife_poa_e53704_Figure_5_figure_supplement_2.pdf]

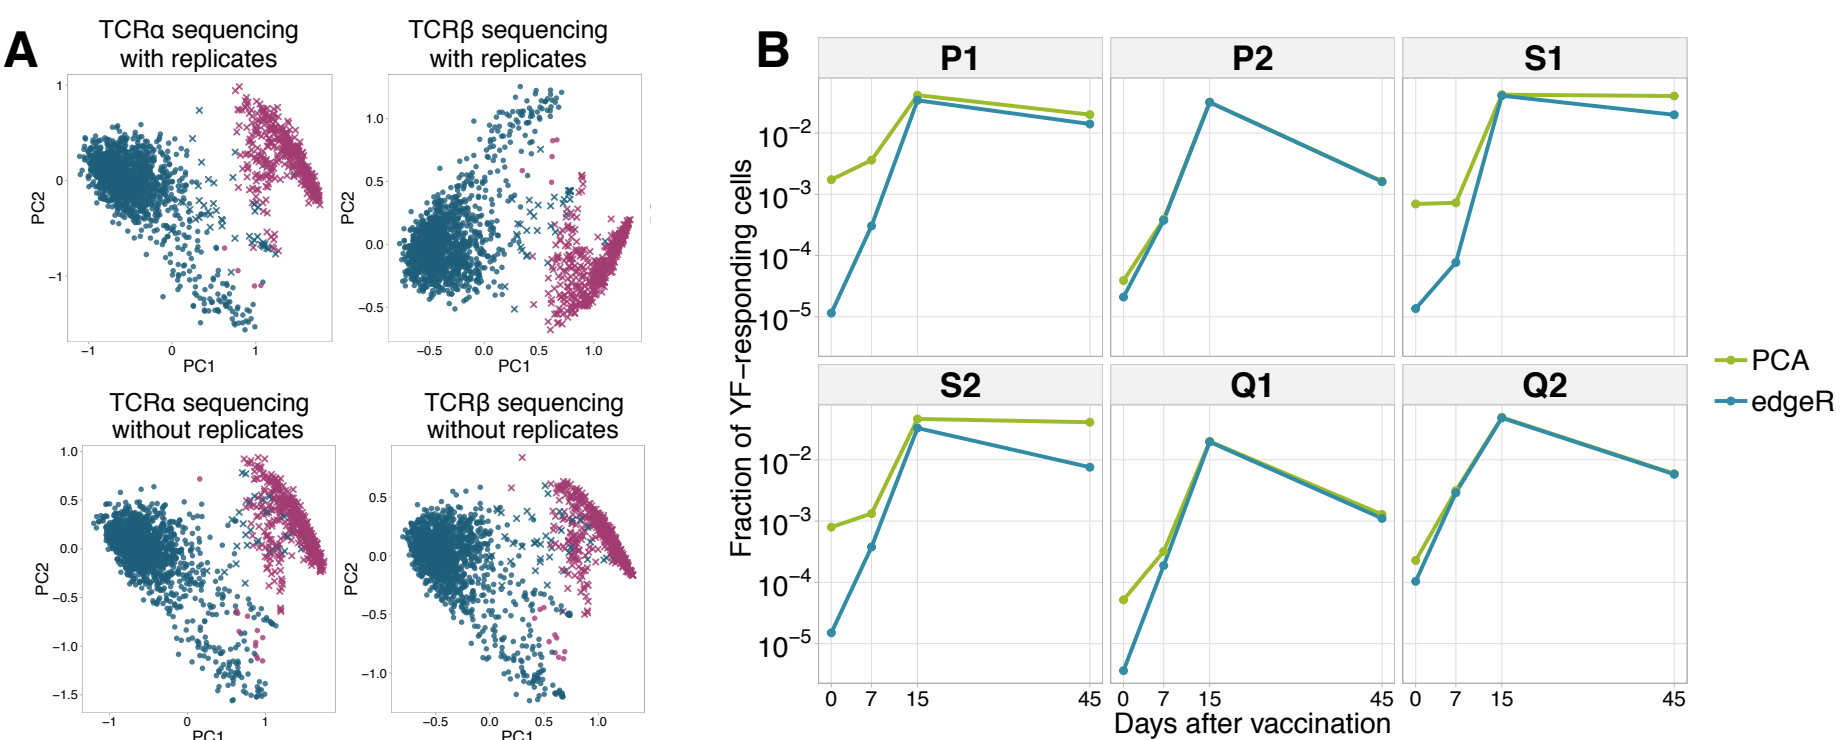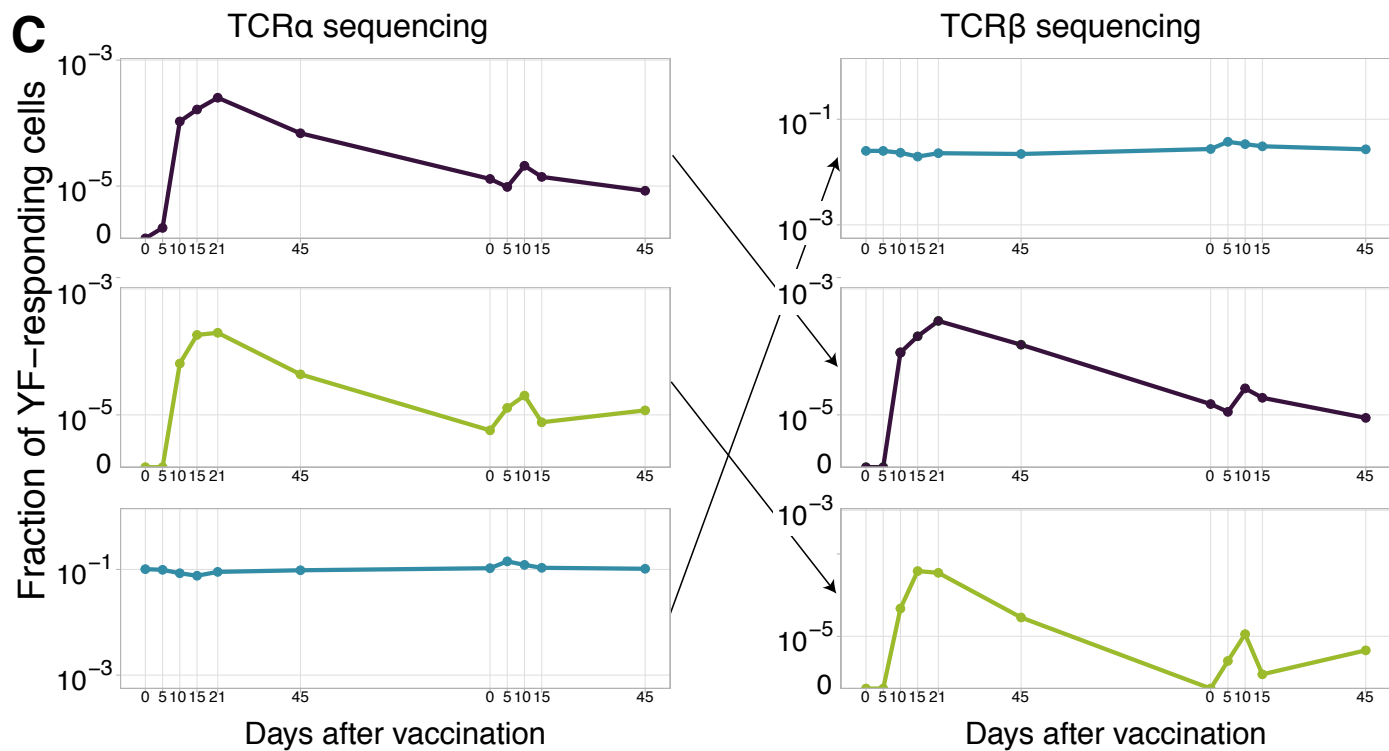

Supplement: supp [file elife-53704-supp-v1.zip › elife_poa_e53704_Figure_2_figure_supplement_4.pdf]

**A**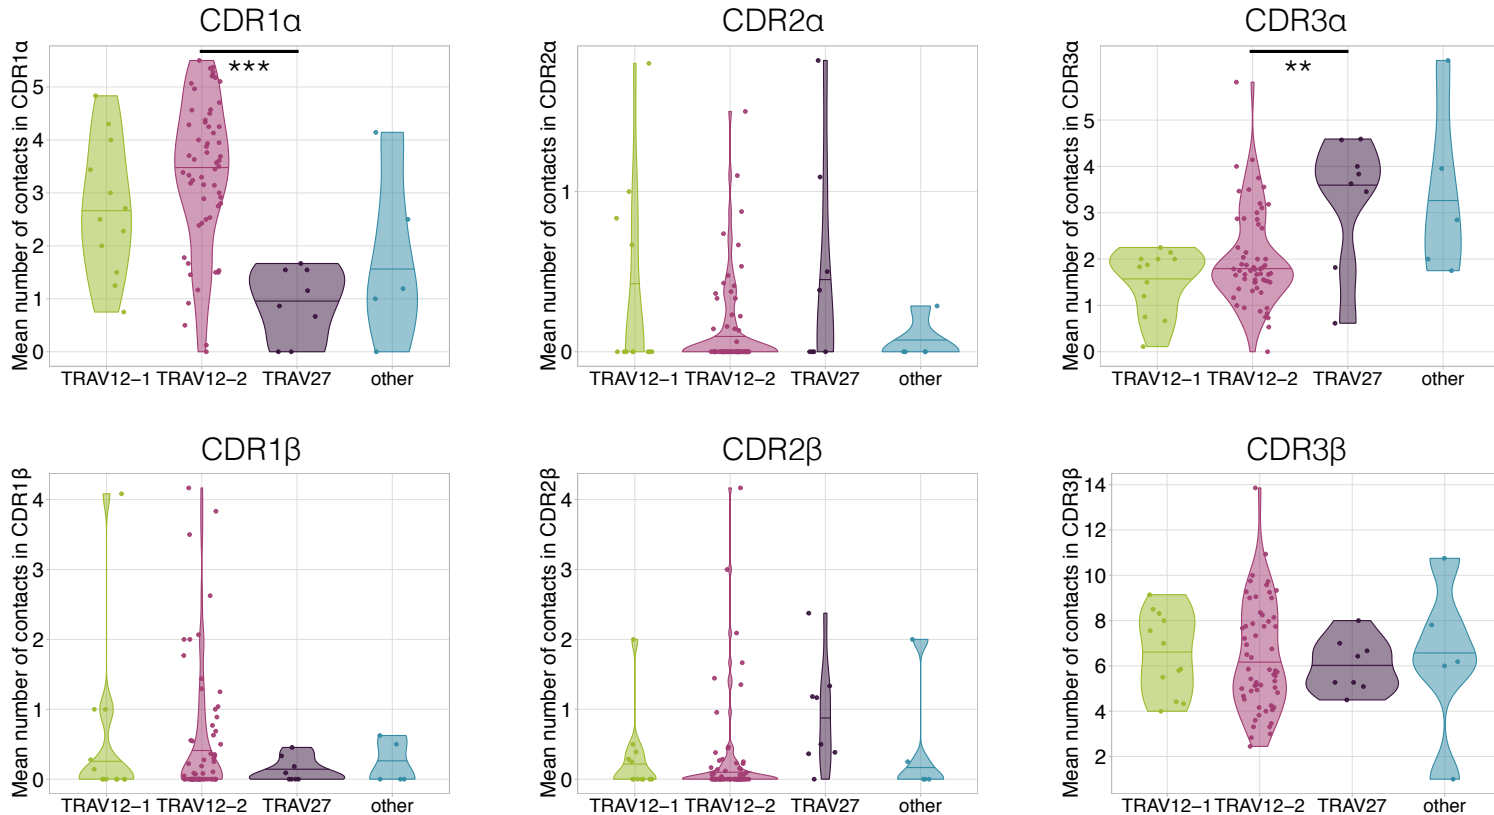**B**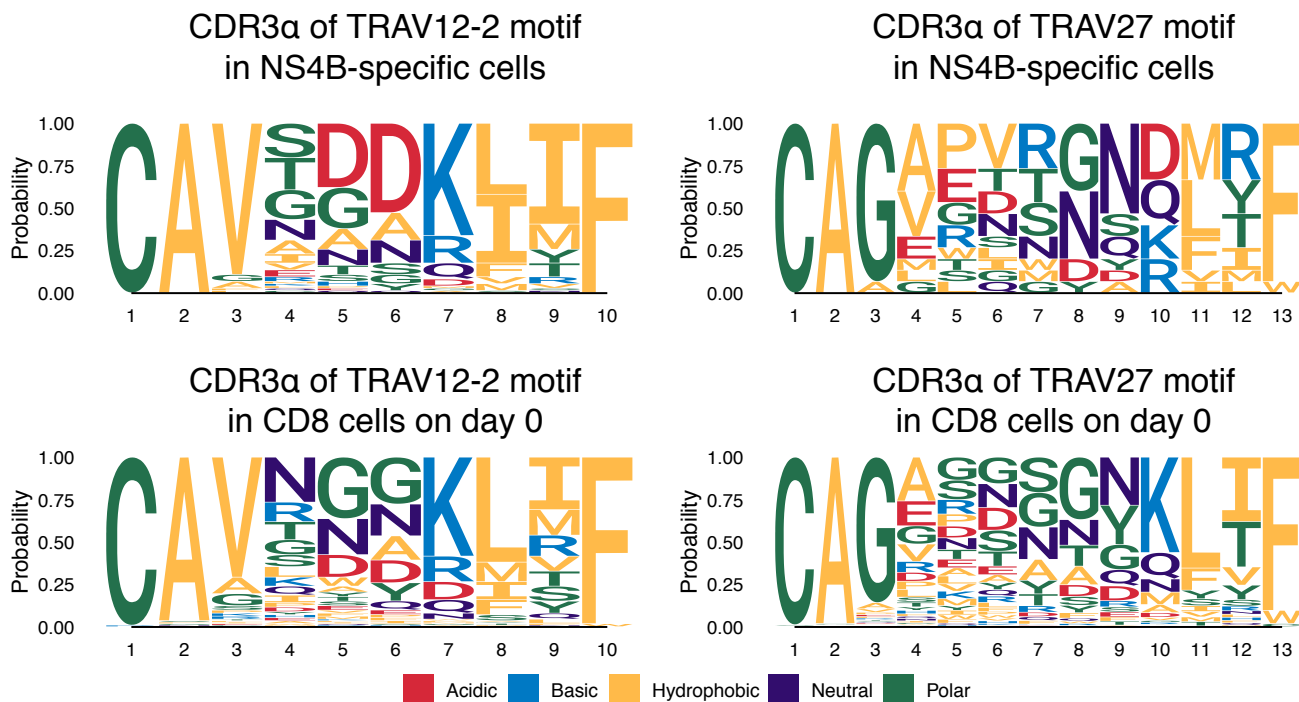

Supplement: supp [file elife-53704-supp-v1.zip › elife_poa_e53704_Figure_4_figure_supplement_4.pdf]

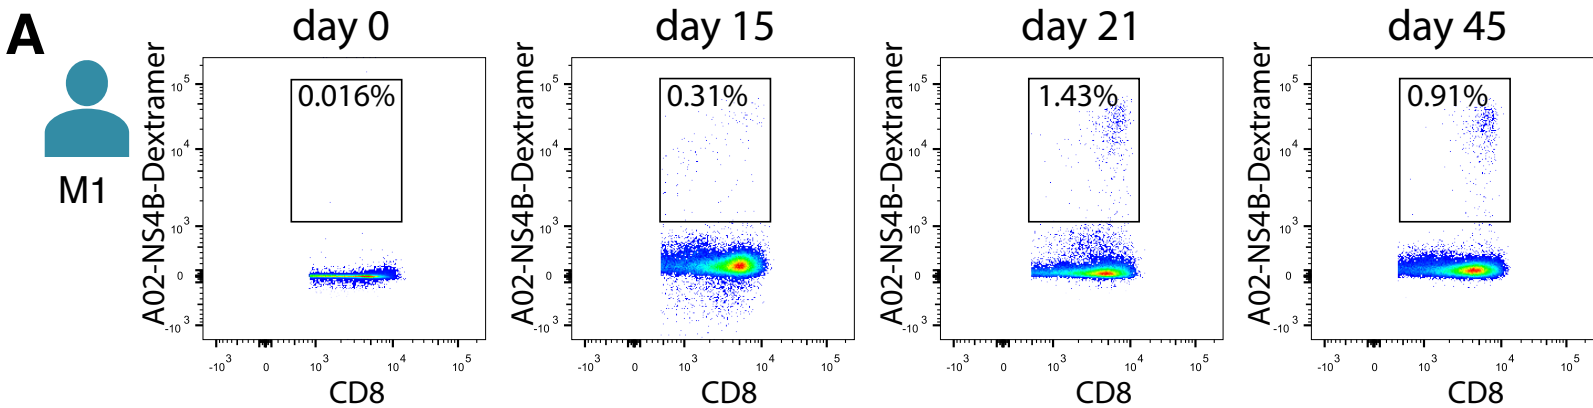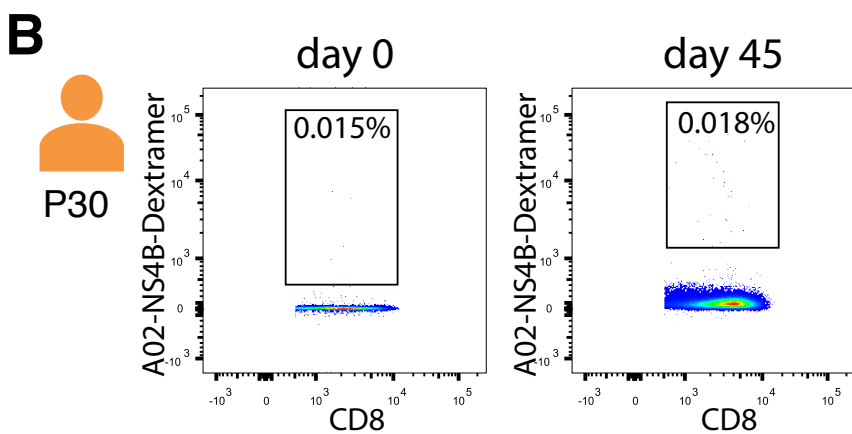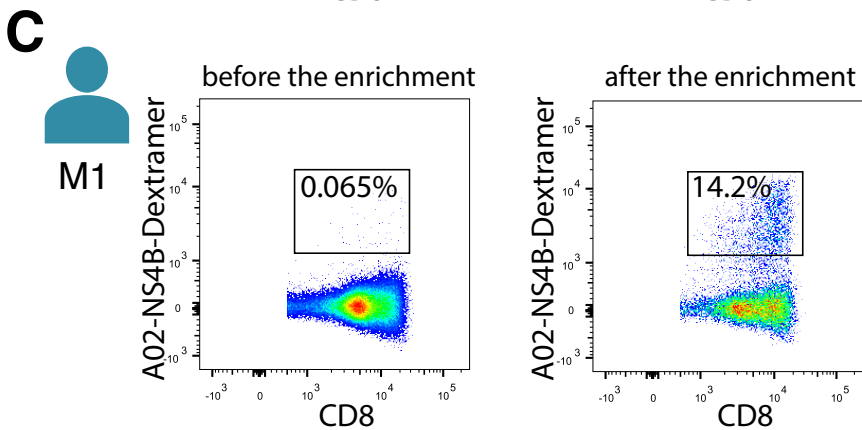

Supplement: supp [file elife-53704-supp-v1.zip › elife_poa_e53704_Figure_4_figure_supplement_1.pdf]

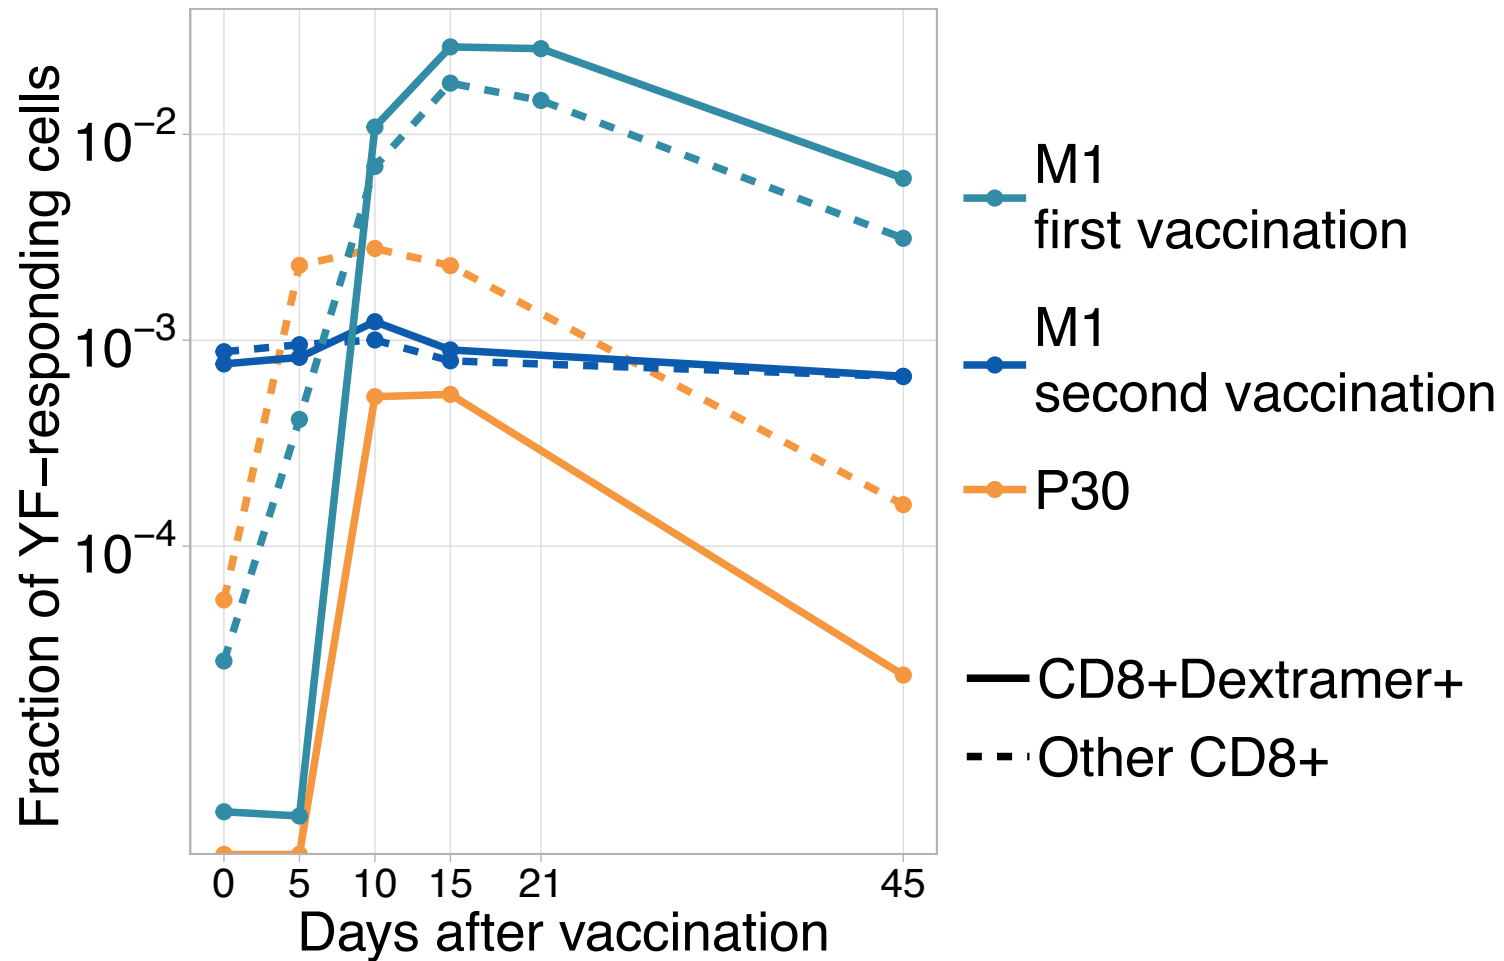

Supplement: supp [file elife-53704-supp-v1.zip › elife_poa_e53704_Figure_4_figure_supplement_2.pdf]

**A**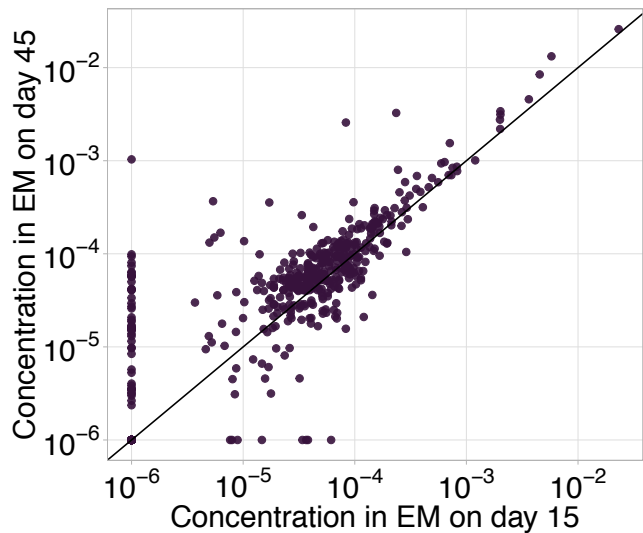**B**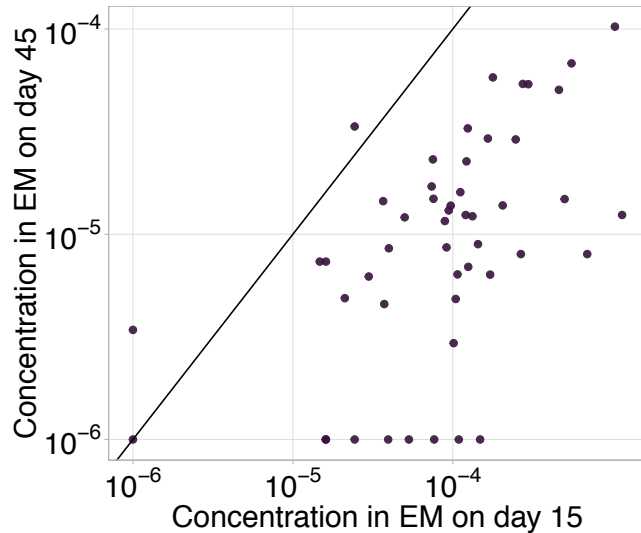**C**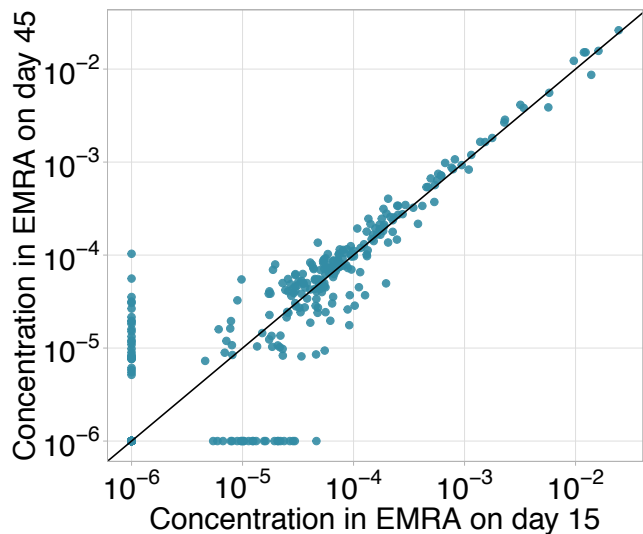**D**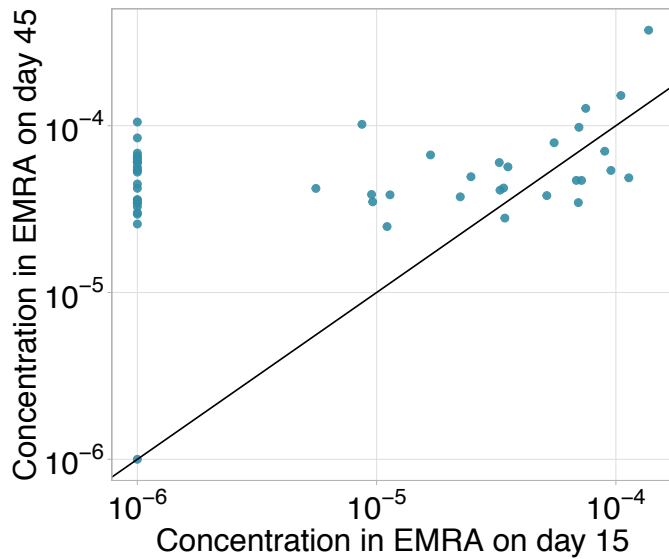

Supplement: supp [file elife-53704-supp-v1.zip › elife_poa_e53704_Figure_3_figure_supplement_2.pdf]

Number of expanded clones  
comparing to day 0

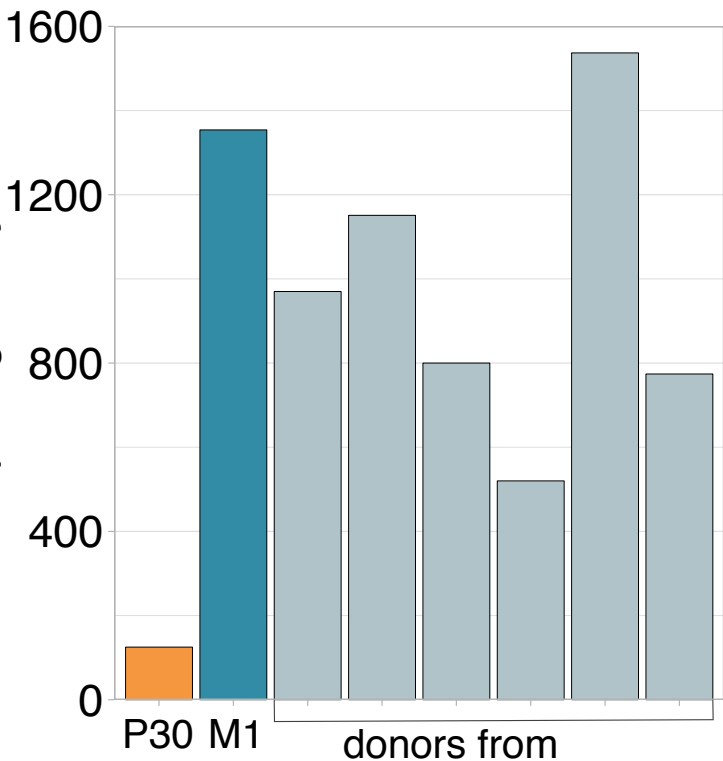

*Pogorelyy et al, 2018*

Supplement: supp [file elife-53704-supp-v1.zip › elife_poa_e53704_Figure_1_figure_supplement_2.pdf]

**A**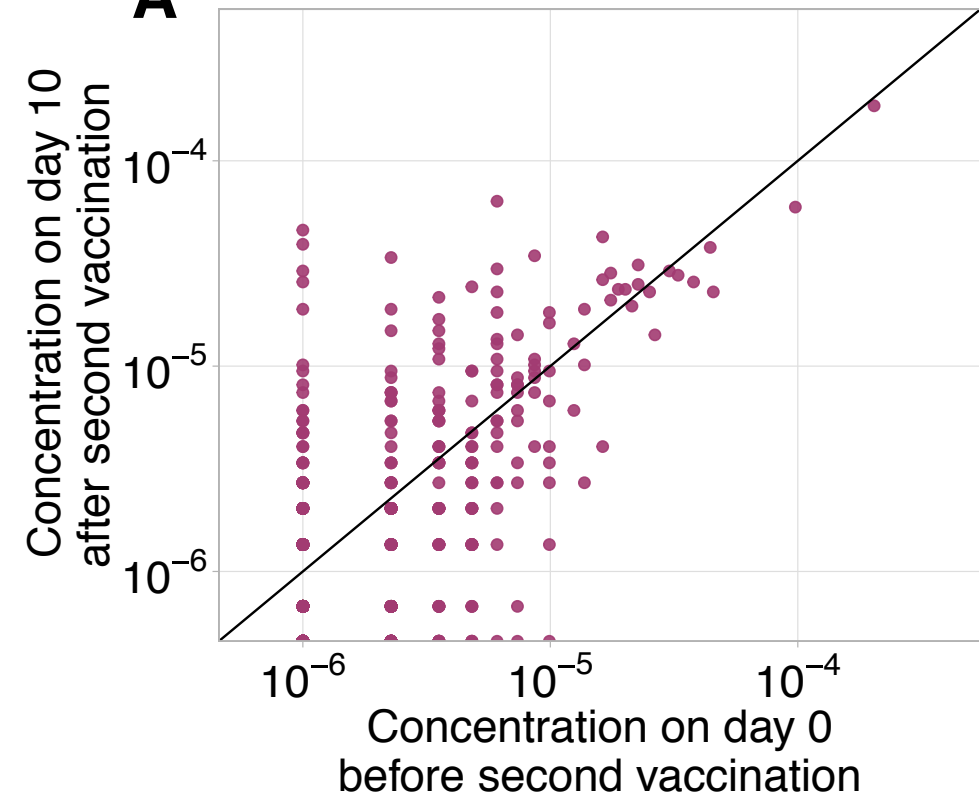**B**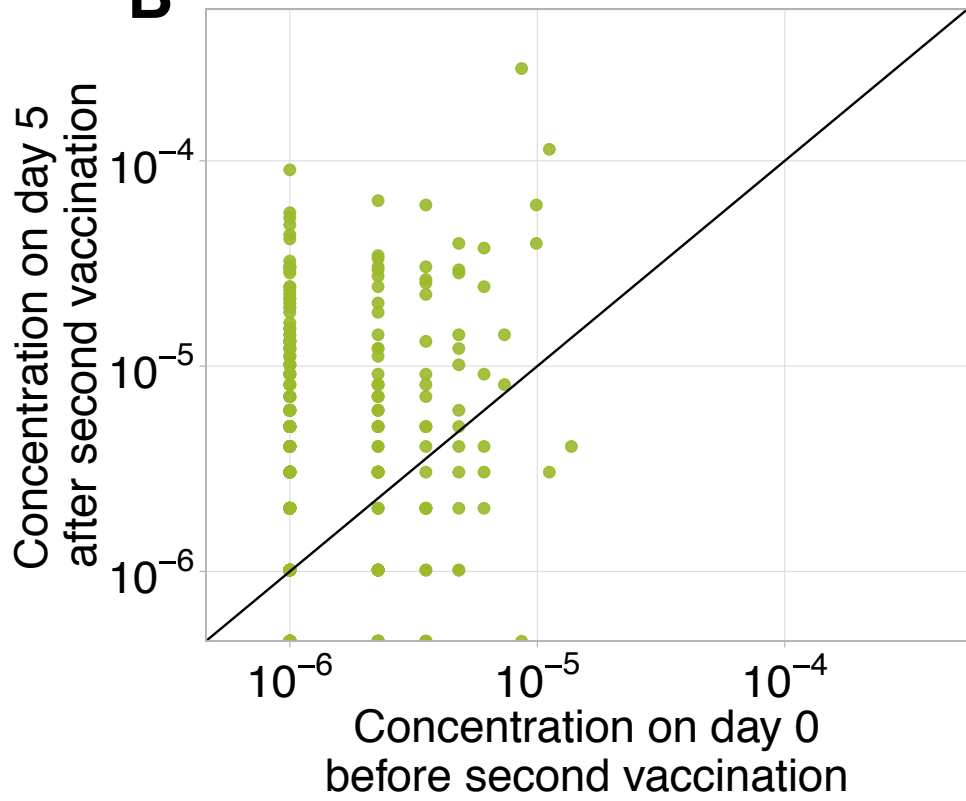

Supplement: supp [file elife-53704-supp-v1.zip › elife_poa_e53704_Figure_2_figure_supplement_3.pdf]

**A**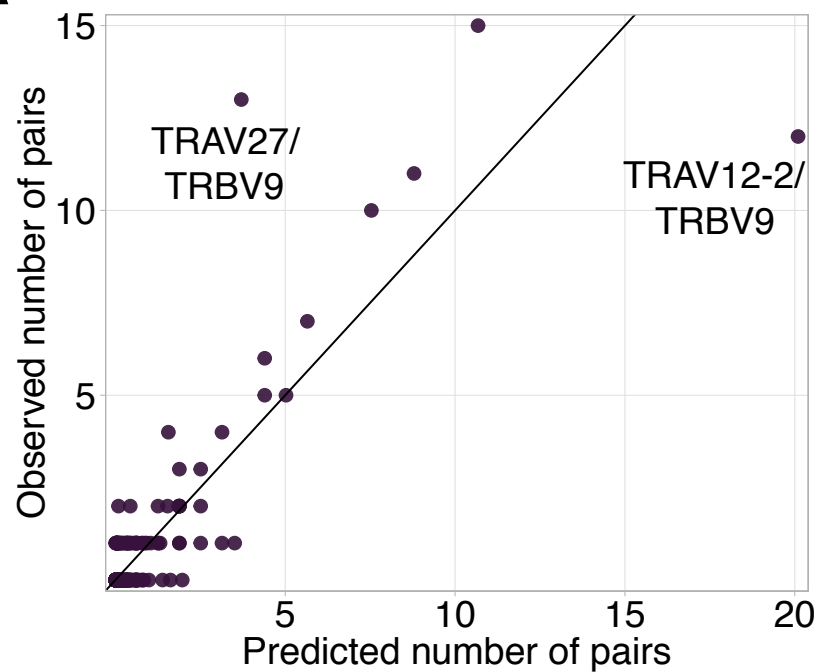**B**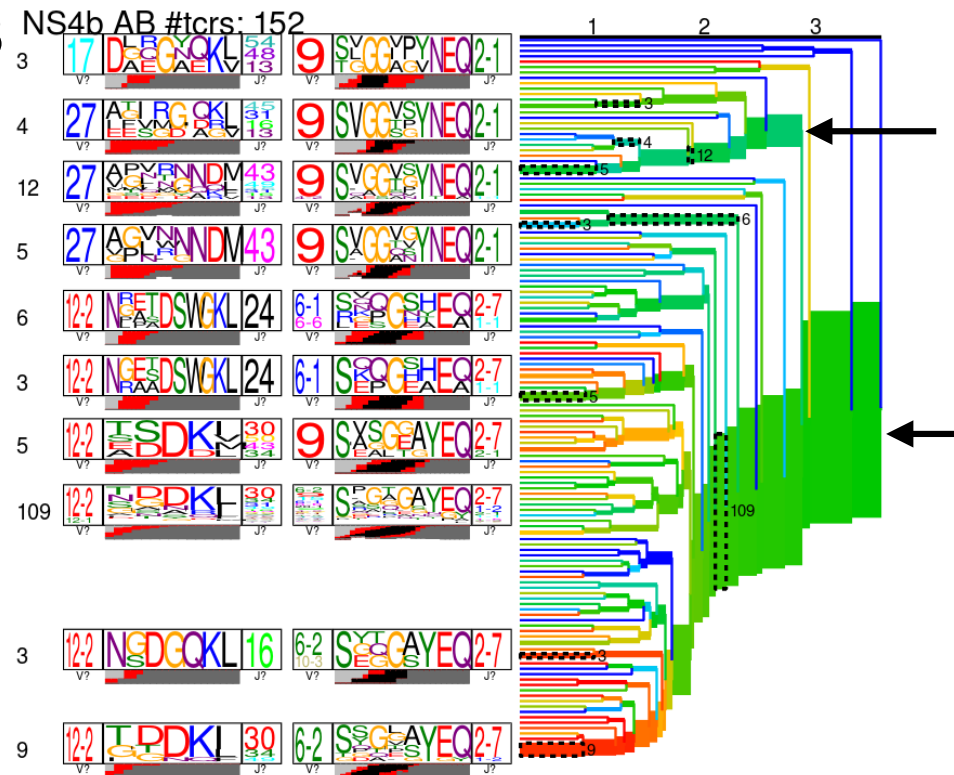**C**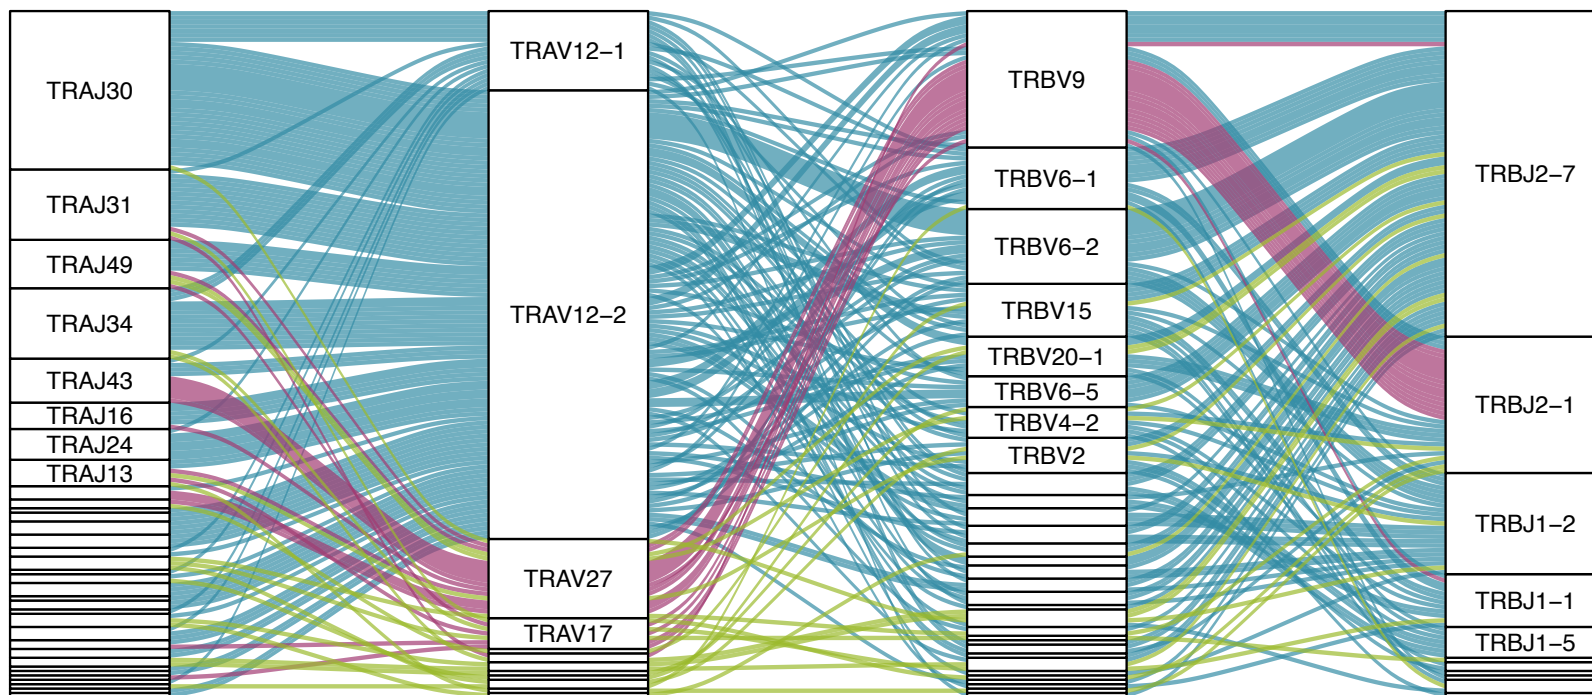

Supplement: supp [file elife-53704-supp-v1.zip › elife_poa_e53704_Figure_4_figure_supplement_3.pdf]

**A**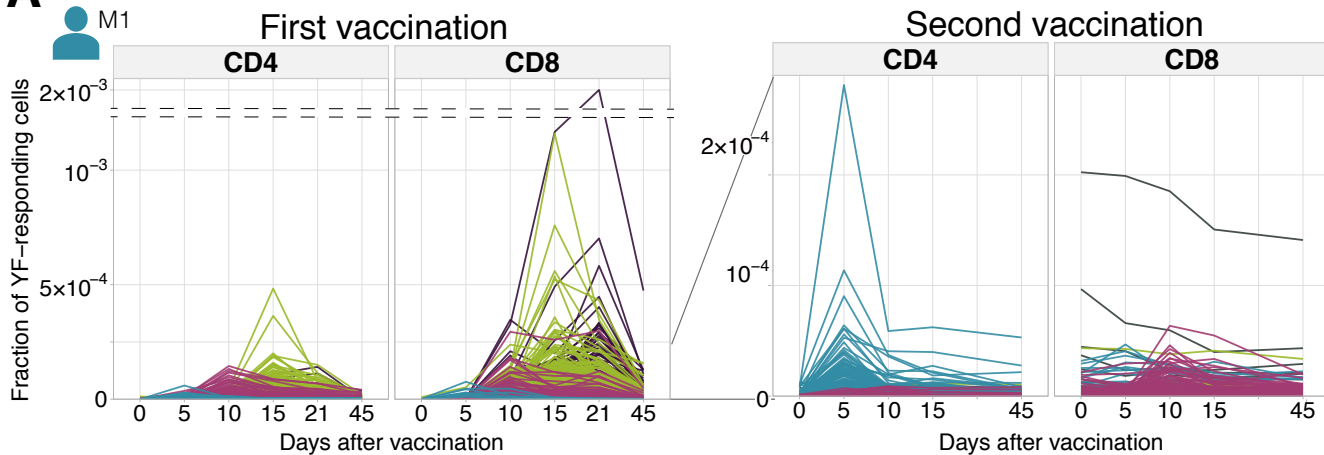**B**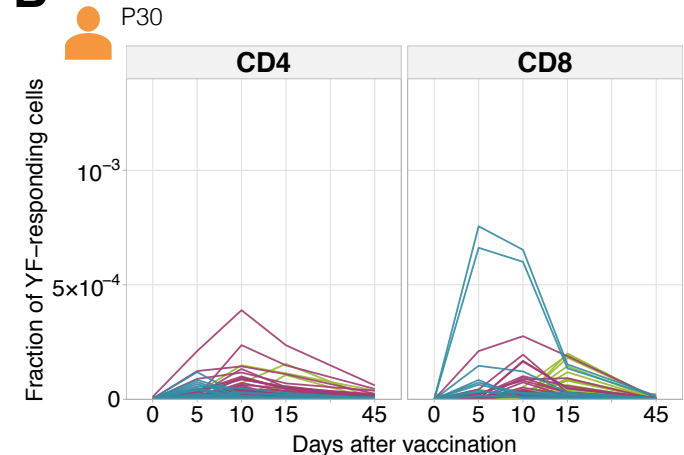

Supplement: supp [file elife-53704-supp-v1.zip › elife_poa_e53704_Figure_2_figure_supplement_1.pdf]
